# Supplementary material for: Quantitative Subcellular Proteome and Secretome Profiling of Influenza A Virus-Infected Human Primary Macrophages
Source: PubMed Central journal article supplement (PMC3093355; doi:10.1371/journal.ppat.1001340), 2011-05-12

**A** Mitochondrial up 6h  
62 distinct proteins

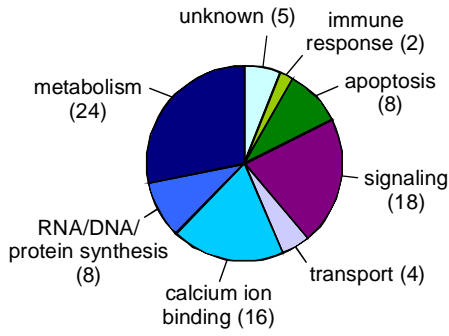

Mitochondrial up 12h  
128 distinct proteins

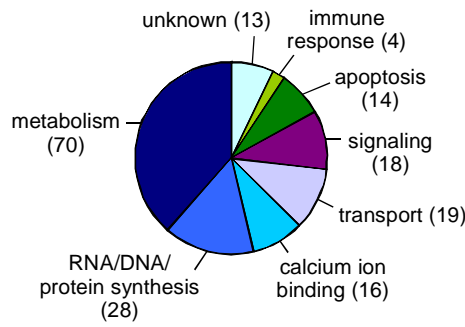

Mitochondrial up 18h  
186 distinct proteins

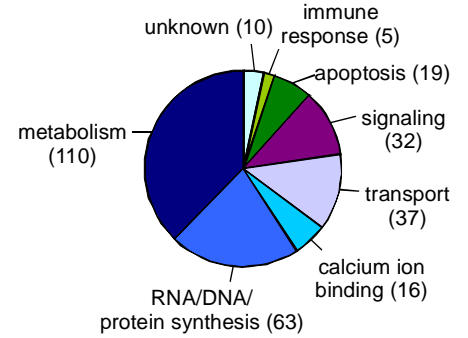

**B** Mitochondrial down 6h  
20 distinct proteins

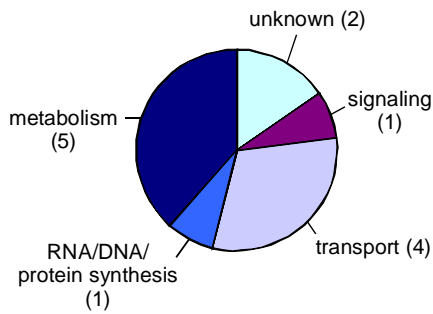

Mitochondrial down 12h  
58 distinct proteins

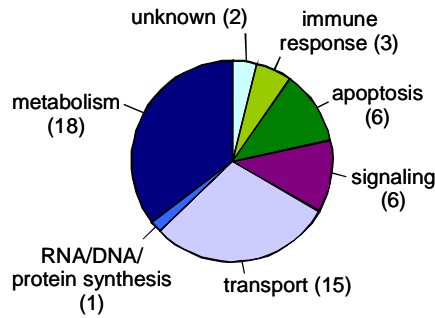

Mitochondrial down 18h  
97 distinct proteins

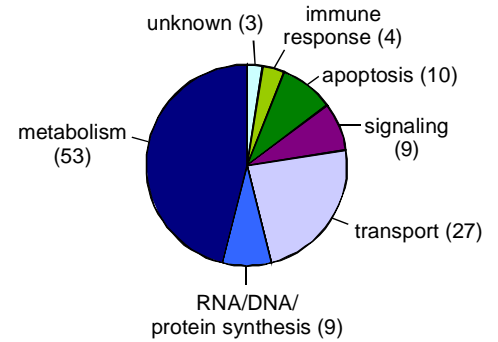

**C** Cytoplasmic up 6h  
211 distinct proteins

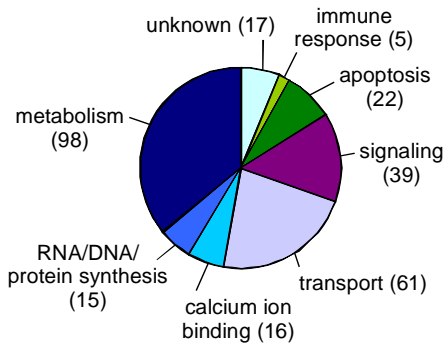

Cytoplasmic up 12h  
102 distinct proteins

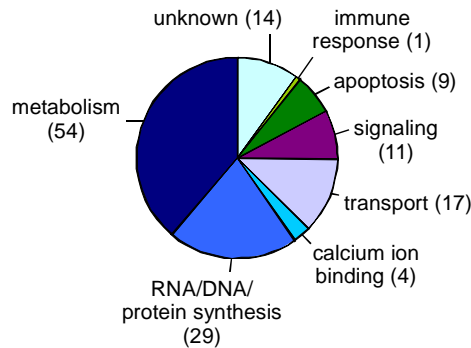

Cytoplasmic up 18h  
175 distinct proteins

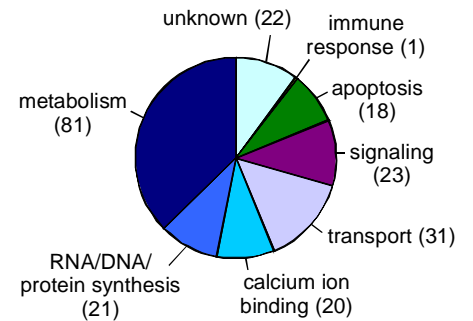

**D** Cytoplasmic down 6h  
49 distinct proteins

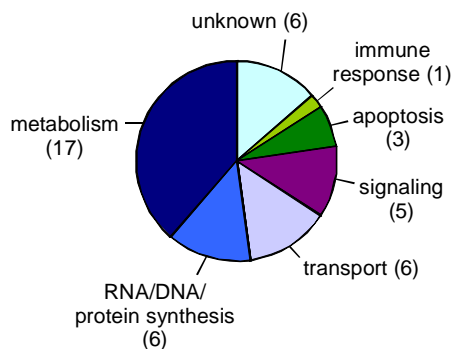

Cytoplasmic down 12h  
30 distinct proteins

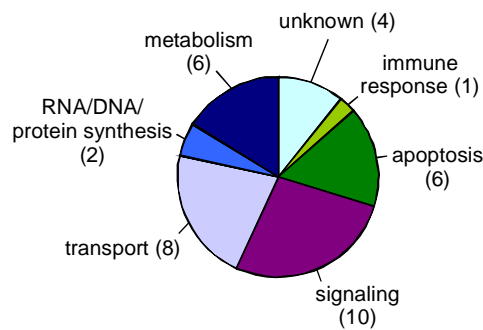

Cytoplasmic down 18h  
89 distinct proteins

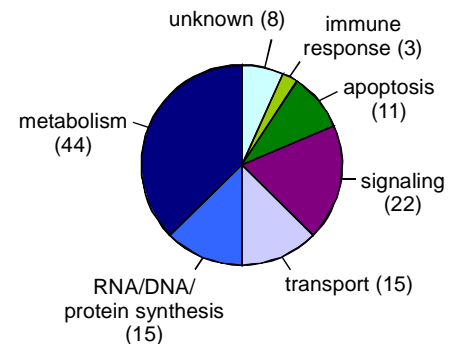

Supplement: ppat.1001340.s002.pdf [file ppat.1001340.s002.pdf]
