# Supplementary material for: Quantitative Subcellular Proteome and Secretome Profiling of Influenza A Virus-Infected Human Primary Macrophages
Source: PLoS Pathog. 2011 May 12;7(5):e1001340. doi: 10.1371/journal.ppat.1001340 (PMC3093355; doi:10.1371/journal.ppat.1001340)
Supplement: Table S1 — Protein identification and relative quantitation results from the iTRAQ experiments. A. intracellular fractions and B. secretome. Results from both biological replicates are shown. (0.58 MB PDF) [file ppat.1001340.s004.pdf]

**Table S1. Protein identification and relative quantitation results from the iTRAQ experiments.** A. intracellular fractions and B. secretome. Results from both biological replicates are shown

A. Intracellular fractions

| Protein name                                                                   | SwissProt access    | mitochondrial fraction      |                             |                           | cytoplasmic fraction       |                            |                            | nuclear fraction         |                            |                            |
|--------------------------------------------------------------------------------|---------------------|-----------------------------|-----------------------------|---------------------------|----------------------------|----------------------------|----------------------------|--------------------------|----------------------------|----------------------------|
|                                                                                |                     | 6h<br>(iTRAQ<br>115:114)    | 12h<br>(iTRAQ<br>116:114)   | 18h<br>(iTRAQ<br>117:114) | 6h<br>(iTRAQ<br>115:114)   | 12h<br>(iTRAQ<br>116:114)  | 18h<br>(iTRAQ<br>117:114)  | 6h<br>(iTRAQ<br>115:114) | 12h<br>(iTRAQ<br>116:114)  | 18h<br>(iTRAQ<br>117:114)  |
| [Pyruvate dehydrogenase [lipoamide]] kinase isozyme 1, mitochondrial precursor | Q15118 PDK1_HUMAN   | 0,67                        | <b>0,69</b>                 |                           |                            |                            |                            |                          |                            |                            |
| [Pyruvate dehydrogenase [lipoamide]] kinase isozyme 3, mitochondrial precursor | Q15120 PDK3_HUMAN   | 0,94                        | 0,88                        |                           |                            |                            |                            |                          |                            |                            |
| 14 kDa phosphohistidine phosphatase                                            | Q9NRX4 PHP14_HUMAN  |                             |                             |                           | 0,92                       | 1,00                       | 0,88                       |                          |                            |                            |
| 14-3-3 protein beta/alpha                                                      | P31946 1433B_HUMAN  | 0,00                        | 0,00                        |                           | 0,85<br><b>0,72</b>        | 1,02<br>0,90               | 0,98<br>0,66               | 1,00                     | 0,87                       | 0,63                       |
| 14-3-3 protein epsilon                                                         | P62258 1433E_HUMAN  | 0,00                        | 0,00                        |                           | 0,82<br>0,95               | 1,06<br>0,89               | 0,99<br>0,92               | 0,00                     | 0,00                       | 0,00                       |
| 14-3-3 protein eta                                                             | Q04917 1433F_HUMAN  |                             |                             |                           | 0,91<br><b>0,80</b>        | 0,98<br>0,91               | 0,80<br>0,96               |                          |                            |                            |
| 14-3-3 protein gamma                                                           | P61981 1433G_HUMAN  | 1,70<br>1,43                | 2,91<br>1,31                | 4,03                      | <b>0,86</b><br><b>0,70</b> | <b>0,83</b><br>0,89        | 0,87<br>0,96               | 1,19                     | 1,14                       | <b>0,56</b>                |
| 14-3-3 protein theta                                                           | P27348 1433T_HUMAN  |                             |                             |                           | 1,02<br><b>0,68</b>        | 1,16<br>0,83               | 1,14<br><b>0,65</b>        |                          |                            |                            |
| 14-3-3 protein zeta/delta                                                      | P63104 1433Z_HUMAN  | 1,51<br>0,00                | 1,64<br>0,00                | 1,92                      | <b>0,85</b><br>0,74        | 0,91<br>0,99               | 1,07<br>0,94               | 1,56                     | 1,44                       | 0,87                       |
| 15 kDa selenoprotein precursor                                                 | O60613 SEP15_HUMAN  | 0,79                        | 1,00                        | 0,95                      |                            |                            |                            |                          |                            |                            |
| 1-acylglycerophosphocholine O-acyltransferase 1                                | Q8NF37 PCAT1_HUMAN  |                             |                             |                           | 0,00                       | 0,00                       | 0,00                       |                          |                            |                            |
| 1-acyl-sn-glycerol-3-phosphate acyltransferase epsilon                         | Q9NUQ2 PLCE_HUMAN   | 0,00                        | 0,00                        | 0,00                      |                            |                            |                            |                          |                            |                            |
| 1-acyl-sn-glycerol-3-phosphate acyltransferase theta                           | Q53EU6 PLCH_HUMAN   | 0,92<br>0,70                | 0,81<br>0,93                | 1,07                      |                            |                            |                            |                          |                            |                            |
| 1-O-acylceramide synthase precursor                                            | Q8NCC3 LYPA3_HUMAN  |                             |                             |                           | 1,24                       | 0,93                       | 0,86                       |                          |                            |                            |
| 1-phosphatidylinositol-4,5-bisphosphate phosphodiesterase beta-2               | Q00722 PLCB2_HUMAN  |                             |                             |                           |                            |                            |                            | 0,85                     | 0,98                       | 0,81                       |
| 2',3'-cyclic-nucleotide 3'-phosphodiesterase                                   | P09543 CN37_HUMAN   | 1,18<br>1,11                | 1,24<br>1,09                | 1,28                      |                            |                            |                            |                          |                            |                            |
| 2,4-dienoyl CoA reductase 2, peroxisomal                                       | Q4VXZ8 Q4VXZ8_HUMAN | 0,91                        | 1,04                        |                           |                            |                            |                            |                          |                            |                            |
| 2,4-dienoyl-CoA reductase, mitochondrial precursor                             | Q16698 DECR_HUMAN   | 0,98<br>0,96                | 0,93<br>1,01                | <b>0,74</b>               | <b>1,91</b><br>2,14        | <b>1,47</b><br><b>1,35</b> | <b>2,48</b><br><b>2,06</b> | 0,87<br><b>0,58</b>      | <b>1,83</b><br><b>1,37</b> | <b>1,78</b><br><b>1,37</b> |
| 2',5'-phosphodiesterase                                                        | Q6L8Q7 PDE25_HUMAN  | 1,03<br>1,11                | 1,29<br>1,04                | 1,40                      |                            |                            |                            |                          |                            |                            |
| 24-dehydrocholesterol reductase precursor                                      | Q15392 DHC24_HUMAN  | 1,05<br>0,96                | 1,26<br>1,04                | 1,24                      |                            |                            |                            |                          |                            |                            |
| 24-kDa subunit of complex I (Fragment)                                         | Q9UEH5 Q9UEH5_HUMAN | 1,08                        | 0,78                        | 0,99                      |                            |                            |                            |                          |                            |                            |
| 26S protease regulatory subunit 6A                                             | P17980 PRS6A_HUMAN  |                             |                             |                           | 0,86<br>0,72               | 1,02<br>0,97               | 0,86<br><b>0,74</b>        |                          |                            |                            |
| 26S protease regulatory subunit 6B                                             | P43686 PRS6B_HUMAN  |                             |                             |                           | 0,92                       | 0,92                       | 0,79                       |                          |                            |                            |
| 26S protease regulatory subunit S10B                                           | P62333 PRS10_HUMAN  |                             |                             |                           | <b>0,78</b><br>0,94        | <b>0,81</b><br>0,90        | <b>0,73</b><br>0,82        |                          |                            |                            |
| 26S proteasome non-ATPase regulatory subunit 1                                 | Q99460 PSMD1_HUMAN  |                             |                             |                           | 0,89                       | 1,06                       | 0,89                       |                          |                            |                            |
| 26S proteasome non-ATPase regulatory subunit 12                                | O00232 PSD12_HUMAN  |                             |                             |                           | 1,18                       | 1,13                       | 0,80                       |                          |                            |                            |
| 26S proteasome non-ATPase regulatory subunit 6                                 | Q15008 PSMD6_HUMAN  |                             |                             |                           | 0,70<br>0,91               | 0,67<br>0,84               | 0,58<br>0,73               |                          |                            |                            |
| 26S proteasome non-ATPase regulatory subunit 7                                 | P51665 PSD7_HUMAN   | 0,97                        | <b>2,68</b>                 | <b>5,75</b>               | 0,86<br>0,82               | 1,05<br><b>0,85</b>        | 0,81<br><b>0,79</b>        | 0,94                     | <b>1,92</b>                | <b>1,50</b>                |
| 26S proteasome non-ATPase regulatory subunit 9                                 | O00233 PSMD9_HUMAN  |                             |                             |                           | <b>0,75</b>                | 0,76                       | 0,43                       |                          |                            |                            |
| 28 kDa heat- and acid-stable phosphoprotein                                    | Q13442 HAP28_HUMAN  |                             |                             |                           | <b>0,62</b>                | 0,88                       | 0,68                       | 0,93<br>1,18             | 1,06<br>1,29               | 0,61<br>1,08               |
| 28S ribosomal protein S15, mitochondrial precursor                             | P82914 RT15_HUMAN   | 0,88<br>1,00                | 0,81<br><b>0,83</b>         | 0,83                      |                            |                            |                            |                          |                            |                            |
| 28S ribosomal protein S16, mitochondrial precursor                             | Q9Y3D3 RT16_HUMAN   | 1,07<br>1,04                | 1,09<br>1,01                | 0,96                      |                            |                            |                            |                          |                            |                            |
| 28S ribosomal protein S17, mitochondrial precursor                             | Q9Y2R5 RT17_HUMAN   |                             |                             |                           |                            |                            |                            |                          |                            |                            |
| 28S ribosomal protein S18a, mitochondrial precursor                            | Q9NVS2 RT18A_HUMAN  | 1,12                        | 1,05                        |                           |                            |                            |                            |                          |                            |                            |
| 28S ribosomal protein S18b, mitochondrial precursor                            | Q9Y676 RT18B_HUMAN  | 0,94                        | 1,04                        |                           |                            |                            |                            |                          |                            |                            |
| 28S ribosomal protein S24, mitochondrial precursor                             | Q96EL2 RT24_HUMAN   | 0,84<br>1,22                | 0,88<br>1,09                | 0,93                      |                            |                            |                            |                          |                            |                            |
| 28S ribosomal protein S26, mitochondrial precursor                             | Q9BYN8 RT26_HUMAN   | <b>0,87</b><br>0,94<br>0,95 | 0,96<br>0,85<br><b>0,85</b> | 0,86                      |                            |                            |                            |                          |                            |                            |
| 28S ribosomal protein S35, mitochondrial precursor                             | P82673 RT35_HUMAN   | 1,55<br>0,99                | 1,36<br>1,00                | 1,25                      |                            |                            |                            |                          |                            |                            |
| 28S ribosomal protein S7, mitochondrial precursor                              | Q9Y2R9 RT07_HUMAN   | 0,88<br>0,92                | 0,95<br>0,90                | 0,80                      |                            |                            |                            |                          |                            |                            |
| 2-aminoethanethiol dioxigenase                                                 | Q96SZ5 AEDO_HUMAN   | 0,94                        | 0,99                        |                           | 0,89                       | 1,03                       | 0,73                       |                          |                            |                            |
| 2-hydroxyacyl-CoA lyase 1                                                      | Q9UJ83 HACL1_HUMAN  | 1,05                        | <b>1,28</b>                 |                           |                            |                            |                            |                          |                            |                            |
| 2-oxoglutarate dehydrogenase E1 component, mitochondrial precursor             | Q02218 ODO1_HUMAN   | 0,96<br><b>0,94</b>         | <b>0,88</b><br>1,02         | <b>0,80</b>               | 0,00                       | 0,00                       | 0,00                       |                          |                            |                            |
| 3 beta-hydroxysteroid dehydrogenase type 7                                     | Q9H2F3 3BHS7_HUMAN  | 0,00<br>0,92                | 0,00<br>1,15                | 0,00                      |                            |                            |                            |                          |                            |                            |
| 3,2-trans-enoyl-CoA isomerase, mitochondrial precursor                         | P42126 D3D2_HUMAN   | 0,93<br><b>0,84</b>         | 1,00<br><b>0,83</b>         | 0,61                      |                            |                            |                            |                          |                            |                            |
| 39S ribosomal protein 54, mitochondrial precursor                              | Q6P161 RM54_HUMAN   | 0,86                        | <b>0,86</b>                 | 0,70                      |                            |                            |                            |                          |                            |                            |
| 39S ribosomal protein L1, mitochondrial precursor                              | Q9BYD6 RM01_HUMAN   | 0,91                        | 0,85                        | 0,81                      |                            |                            |                            |                          |                            |                            |
| 39S ribosomal protein L10, mitochondrial precursor                             | Q7Z7H8 RM10_HUMAN   |                             |                             |                           |                            |                            |                            |                          |                            |                            |
| 39S ribosomal protein L11, mitochondrial precursor                             | Q9Y3B7 RM11_HUMAN   | 1,07<br>0,88<br>1,07        | 0,97<br>0,95<br><b>0,85</b> | 0,83                      |                            |                            |                            |                          |                            |                            |
| 39S ribosomal protein L12, mitochondrial precursor                             | P52815 RM12_HUMAN   | 0,91<br>0,98                | 0,92<br>0,99                | <b>0,75</b>               | <b>1,97</b>                | <b>1,54</b>                | <b>2,50</b>                | 0,92<br><b>1,66</b>      | <b>2,28</b><br><b>3,27</b> | <b>1,81</b><br><b>4,26</b> |
| 39S ribosomal protein L13, mitochondrial                                       | Q9BYD1 RM13_HUMAN   | 1,14<br>0,87                | 1,49<br>0,92                | 7,18                      |                            |                            |                            |                          |                            |                            |
| 39S ribosomal protein L14, mitochondrial precursor                             | Q6P1L8 RM14_HUMAN   |                             |                             |                           |                            |                            |                            |                          |                            |                            |
| 39S ribosomal protein L15, mitochondrial precursor                             | Q9P015 RM15_HUMAN   | 1,11<br>0,82<br>1,04        | 1,01<br><b>0,70</b><br>0,94 | <b>0,67</b>               |                            |                            |                            |                          |                            |                            |
| 39S ribosomal protein L16, mitochondrial precursor                             | Q9NX20 RM16_HUMAN   | 0,83<br>1,05                | 0,79<br>0,94                | 0,80                      |                            |                            |                            |                          |                            |                            |
| 39S ribosomal protein L17, mitochondrial precursor                             | Q9NRX2 RM17_HUMAN   | 1,17<br><b>0,80</b>         | 1,08<br>0,87                | 0,78                      |                            |                            |                            |                          |                            |                            |
| 39S ribosomal protein L18, mitochondrial precursor                             | Q9H0U6 RM18_HUMAN   | <b>0,97</b><br><b>0,69</b>  | 0,92<br>0,87                | 0,85                      |                            |                            |                            |                          |                            |                            |
| 39S ribosomal protein L19, mitochondrial precursor                             | P49406 RM19_HUMAN   | 0,89<br>0,98                | 0,82<br>0,93                | <b>0,72</b>               |                            |                            |                            |                          |                            |                            |

|                                                                    |                     |                            |                            |             |                            |                            |                            |                            |                            |                            |
|--------------------------------------------------------------------|---------------------|----------------------------|----------------------------|-------------|----------------------------|----------------------------|----------------------------|----------------------------|----------------------------|----------------------------|
| 39S ribosomal protein L2, mitochondrial precursor                  | Q5T653 RM02_HUMAN   | 1,19<br>0,93               | 1,05<br>0,95               | 0,97        |                            |                            |                            |                            |                            |                            |
| 39S ribosomal protein L20, mitochondrial precursor                 | Q9BYC9 RM20_HUMAN   | 1,16<br>0,86               | 1,08<br>0,89               | 1,00        |                            |                            |                            |                            |                            |                            |
| 39S ribosomal protein L21, mitochondrial precursor                 | Q7Z2W9 RM21_HUMAN   |                            | 0,96<br>0,99               |             |                            |                            |                            |                            |                            |                            |
| 39S ribosomal protein L22, mitochondrial precursor                 | Q9NWU5 RM22_HUMAN   |                            | 0,89<br>0,91               |             |                            |                            |                            |                            |                            |                            |
| 39S ribosomal protein L24, mitochondrial precursor                 | Q96A35 RM24_HUMAN   | 0,99<br>0,98               | <b>0,84</b><br>1,01        | <b>0,64</b> |                            |                            |                            |                            |                            |                            |
| 39S ribosomal protein L28, mitochondrial precursor                 | Q13084 RM28_HUMAN   | 0,84                       | 0,88                       | 0,78        |                            |                            |                            |                            |                            |                            |
| 39S ribosomal protein L30, mitochondrial precursor                 | Q8TCC3 RM30_HUMAN   | 0,98                       | 0,91                       | 0,92        |                            |                            |                            |                            |                            |                            |
| 39S ribosomal protein L32, mitochondrial precursor                 | Q9BYC8 RM32_HUMAN   | 1,02<br>1,00               | 1,03<br>1,04               | 0,77        |                            |                            |                            |                            |                            |                            |
| 39S ribosomal protein L34, mitochondrial precursor                 | Q9BQ48 RM34_HUMAN   |                            | 1,09<br>0,88               |             |                            |                            |                            |                            |                            |                            |
| 39S ribosomal protein L35, mitochondrial precursor                 | Q9NZE8 RM35_HUMAN   |                            | 1,20<br>1,02               |             |                            |                            |                            |                            |                            |                            |
| 39S ribosomal protein L37, mitochondrial precursor                 | Q9BZE1 RM37_HUMAN   | 0,89<br>0,95               | <b>0,72</b><br>1,00        | <b>0,69</b> |                            |                            |                            |                            |                            |                            |
| 39S ribosomal protein L38, mitochondrial precursor                 | Q96DV4 RM38_HUMAN   | 0,87<br>0,96               | 0,88<br>0,91               | <b>0,74</b> |                            |                            |                            |                            |                            |                            |
| 39S ribosomal protein L40, mitochondrial precursor                 | Q9NQ50 RM40_HUMAN   | 0,79<br>1,07               | 1,18<br>0,93               | 1,07        |                            |                            |                            |                            |                            |                            |
| 39S ribosomal protein L41, mitochondrial precursor                 | Q8IXM3 RM41_HUMAN   |                            | 0,76<br>0,97               |             |                            |                            |                            |                            |                            |                            |
| 39S ribosomal protein L43, mitochondrial precursor                 | Q8N983 RM43_HUMAN   | 0,95                       | 0,93                       | 0,81        |                            |                            |                            |                            |                            |                            |
| 39S ribosomal protein L44, mitochondrial precursor                 | Q9H9J2 RM44_HUMAN   | 0,77<br>0,94               | 0,86<br>1,09               | 1,04        |                            |                            |                            |                            |                            |                            |
| 39S ribosomal protein L45, mitochondrial precursor                 | Q9BRJ2 RM45_HUMAN   | 1,12<br>1,05               | 0,98<br>0,93               | 1,02        |                            |                            |                            |                            |                            |                            |
| 39S ribosomal protein L46, mitochondrial precursor                 | Q9H2W6 RM46_HUMAN   | 0,98<br>0,94               | 0,99<br>1,00               | 0,88        |                            |                            |                            |                            |                            |                            |
| 39S ribosomal protein L47, mitochondrial precursor                 | Q9HD33 RM47_HUMAN   | <b>0,76</b>                | <b>0,78</b>                | 0,81        |                            |                            |                            |                            |                            |                            |
| 39S ribosomal protein L48, mitochondrial precursor                 | Q96GC5 RM48_HUMAN   | 0,00<br>0,83               | 0,00<br>0,97               | 0,00        |                            |                            |                            |                            |                            |                            |
| 39S ribosomal protein L51, mitochondrial precursor                 | Q4U2R6 RM51_HUMAN   |                            | 1,03<br>0,92               |             |                            |                            |                            |                            |                            |                            |
| 39S ribosomal protein L53, mitochondrial precursor                 | Q96EL3 RM53_HUMAN   | 0,91                       | <b>0,83</b>                |             | 2,90                       | 1,69                       | 1,51                       |                            |                            |                            |
| 39S ribosomal protein L55, mitochondrial precursor                 | Q7Z7F7 RM55_HUMAN   | 1,09<br>0,92               | 1,02<br>0,92               |             |                            |                            |                            |                            |                            |                            |
| 39S ribosomal protein L9, mitochondrial precursor                  | Q9BYD2 RM09_HUMAN   | 0,92<br>1,02               | 1,02<br>0,92               | 0,84        |                            |                            |                            |                            |                            |                            |
| 3-hydroxyacyl-CoA dehydrogenase type-2                             | Q99714 HCD2_HUMAN   | 1,01<br>0,97               | 0,87<br>0,92               | <b>0,73</b> |                            |                            |                            |                            |                            |                            |
| 3-hydroxyisobutyryl-CoA hydrolase, mitochondrial precursor         | Q6NVY1 HIBCH_HUMAN  | 0,94<br><b>1,07</b>        | 0,84<br>1,01               | <b>0,57</b> | 0,00                       | 0,00                       | 0,00                       |                            |                            |                            |
| 3-ketoacyl-CoA thiolase, mitochondrial                             | P42765 THIM_HUMAN   | <b>0,91</b>                | <b>0,84</b>                | <b>0,68</b> | <b>2,24</b><br><b>1,78</b> | <b>1,75</b><br>1,19        | <b>3,26</b><br><b>1,90</b> | 1,10<br><b>0,62</b>        | 1,16<br>1,00               | <b>2,10</b><br><b>1,22</b> |
| 3-ketoacyl-CoA thiolase, peroxisomal precursor                     | P09110 THIK_HUMAN   | 1,01<br>0,96               | 0,86<br><b>0,82</b>        | <b>0,82</b> | 0,00<br>2,31               | 0,00<br>0,96               | 0,00<br>1,69               |                            |                            |                            |
| 3-mercaptopyruvate sulfurtransferase variant (Fragment)            | Q59HD5 Q59HD5_HUMAN |                            |                            |             |                            | 0,88                       | 1,09                       | 0,79                       |                            |                            |
| 3-oxoacyl-[acyl-carrier-protein] synthase, mitochondrial precursor | Q9NWW1 OXSM_HUMAN   |                            | 1,22<br>1,16               |             |                            |                            |                            |                            |                            |                            |
| 3-oxoacyl-CoA thiolase (Fragment)                                  | Q8NCW8 Q8NCW8_HUMAN |                            |                            |             |                            |                            |                            | 1,49<br>0,66               | 3,37<br>1,47               | <b>5,11</b><br>1,52        |
| 40S ribosomal protein S10                                          | P46783 RS10_HUMAN   |                            |                            |             | <b>1,16</b><br>1,02        | <b>0,89</b><br><b>0,88</b> | 0,98<br>1,00               | <b>0,87</b><br><b>1,42</b> | <b>1,24</b><br><b>1,95</b> | <b>0,73</b><br><b>1,49</b> |
| 40S ribosomal protein S11                                          | P62280 RS11_HUMAN   | 1,06                       | <b>1,75</b>                | <b>5,16</b> | <b>1,23</b><br><b>1,29</b> | 0,95<br><b>1,18</b>        | 0,97<br>1,08               | 0,94<br><b>0,40</b>        | <b>0,63</b><br><b>0,44</b> | <b>0,62</b><br><b>0,46</b> |
| 40S ribosomal protein S12                                          | Q76M58 Q76M58_HUMAN | 0,91                       | 0,62                       | 1,59        | <b>1,17</b>                | 0,97                       | <b>1,15</b>                | <b>0,58</b><br>0,70        | 0,62<br>1,37               | <b>0,42</b><br>0,62        |
| 40S ribosomal protein S13                                          | P62277 RS13_HUMAN   | 0,90                       | <b>1,23</b>                | <b>2,09</b> | <b>1,22</b><br><b>1,18</b> | <b>0,88</b><br>0,92        | 0,96<br>1,07               | 0,96<br><b>1,39</b>        | <b>0,61</b><br><b>0,54</b> | <b>0,39</b><br><b>0,53</b> |
| 40S ribosomal protein S14                                          | P62263 RS14_HUMAN   | 1,34<br>1,96               | 1,97<br>1,65               | <b>4,85</b> | <b>1,32</b><br><b>1,34</b> | 0,95<br>0,99               | 1,15<br>1,08               | <b>0,74</b><br><b>0,79</b> | 1,02<br>0,99               | <b>0,59</b><br>0,91        |
| 40S ribosomal protein S15                                          | P62841 RS15_HUMAN   | 0,98                       | 1,31                       | <b>3,10</b> |                            | 1,03<br>0,89               | 1,06                       |                            |                            |                            |
| 40S ribosomal protein S15a                                         | P62244 RS15A_HUMAN  | 1,27                       | <b>1,59</b>                | <b>3,12</b> | <b>1,22</b><br>0,91        | 0,91<br>0,82               | 1,03<br>1,08               | 0,76                       | 1,08                       | <b>0,63</b>                |
| 40S ribosomal protein S16                                          | P62249 RS16_HUMAN   | 0,89                       | <b>1,32</b>                | <b>2,47</b> | <b>1,48</b><br><b>1,42</b> | 1,12<br>1,01               | <b>1,45</b><br>1,29        | 0,99<br><b>1,62</b>        | 0,92<br>0,80               | <b>0,51</b><br>0,81        |
| 40S ribosomal protein S17                                          | P08708 RS17_HUMAN   |                            |                            |             | 1,45                       | 0,90                       | 1,10                       | 0,80<br>1,03               | 0,60<br>1,04               | 0,63<br>1,02               |
| 40S ribosomal protein S2                                           | P15880 RS2_HUMAN    | 1,20                       | 1,44                       | <b>2,70</b> |                            |                            |                            | 0,93                       | <b>0,77</b>                | <b>0,74</b>                |
| 40S ribosomal protein S20                                          | P60866 RS20_HUMAN   | 1,70                       | 1,63                       | 4,63        | 1,23<br>1,40               | 0,85<br>0,80               | 0,98<br>1,06               | 0,88<br><b>0,70</b>        | 0,87<br>0,67               | <b>0,61</b><br><b>0,56</b> |
| 40S ribosomal protein S23                                          | P62266 RS23_HUMAN   | 0,73                       | 1,19                       | 1,95        | 1,10<br>1,47               | 0,90<br>1,13               | 0,98<br>1,33               | 1,03<br><b>0,59</b>        | <b>0,63</b><br><b>0,62</b> | <b>0,79</b><br><b>0,71</b> |
| 40S ribosomal protein S24                                          | Q7Z3D1 Q7Z3D1_HUMAN | 0,00                       | 0,00                       | 0,00        | 0,88                       | 0,98                       | 0,96                       | <b>0,58</b>                | 0,96                       | 0,56                       |
| 40S ribosomal protein S25                                          | P62851 RS25_HUMAN   | 0,88                       | <b>1,68</b>                | <b>4,42</b> | 1,20<br>0,98               | 1,04<br>0,95               | 1,14<br>1,05               | 0,94<br><b>1,24</b>        | <b>1,22</b><br><b>1,73</b> | 1,00<br><b>1,87</b>        |
| 40S ribosomal protein S26                                          | P62854 RS26_HUMAN   | 0,71                       | 1,45                       | <b>3,43</b> | 1,11<br><b>1,41</b>        | 0,82<br>0,91               | 0,94<br>0,75               | 0,82                       | <b>0,60</b>                | <b>0,64</b>                |
| 40S ribosomal protein S27-like protein                             | Q71UM5 RS27L_HUMAN  | 0,00                       | 0,00                       | 0,00        |                            |                            |                            |                            |                            |                            |
| 40S ribosomal protein S28                                          | P62857 RS28_HUMAN   |                            |                            |             |                            | 0,98<br><b>0,74</b>        | 0,98                       | <b>0,76</b><br>1,15        | <b>0,71</b><br>0,96        | <b>0,35</b><br><b>0,59</b> |
| 40S ribosomal protein S3                                           | P23396 RS3_HUMAN    | 1,12<br>1,21               | 1,32<br>1,33               | <b>2,48</b> | <b>1,44</b><br>1,27        | 1,15<br>1,03               | 1,27<br>1,03               | 0,92<br><b>0,55</b>        | 0,83<br><b>0,68</b>        | <b>0,67</b><br><b>0,56</b> |
| 40S ribosomal protein S30                                          | P62861 RS30_HUMAN   |                            |                            |             | <b>0,00</b><br><b>1,28</b> | <b>0,00</b><br>0,93        | <b>0,00</b><br>1,00        |                            |                            |                            |
| 40S ribosomal protein S4, X isoform                                | P62701 RS4X_HUMAN   |                            |                            |             |                            |                            |                            |                            |                            |                            |
| 40S ribosomal protein S5                                           | P46782 RS5_HUMAN    | 1,12                       | <b>1,42</b>                | <b>3,66</b> | <b>1,23</b><br><b>1,19</b> | 0,89<br>0,90               | 1,05<br>1,08               | 0,90<br>0,94               | 0,93<br>0,99               | <b>0,68</b><br><b>0,75</b> |
| 40S ribosomal protein S6                                           | P62753 RS6_HUMAN    |                            |                            |             |                            |                            |                            | 1,00                       | 1,03                       | <b>1,21</b>                |
| 40S ribosomal protein S7                                           | P62081 RS7_HUMAN    | 1,05                       | <b>1,73</b>                | <b>3,77</b> | <b>1,23</b><br>1,43        | 1,01<br>0,93               | 1,20<br>1,39               | <b>0,74</b><br><b>1,36</b> | <b>1,80</b><br><b>1,38</b> | 0,89<br>1,15               |
| 40S ribosomal protein S9                                           | P46781 RS9_HUMAN    | 1,07<br><b>0,79</b>        | <b>1,47</b><br><b>1,37</b> | <b>2,88</b> | <b>1,27</b><br><b>1,54</b> | <b>0,84</b><br>1,18        | <b>0,81</b><br>1,40        | 0,92<br><b>0,85</b>        | <b>0,70</b><br><b>0,52</b> | <b>0,69</b><br><b>0,64</b> |
| 40S ribosomal protein SA                                           | P08865 RSSA_HUMAN   |                            |                            |             | <b>1,49</b><br>1,10        | 1,11<br><b>0,78</b>        | <b>1,34</b><br>0,93        | 1,10<br><b>1,38</b>        | <b>0,62</b><br>0,77        | <b>0,50</b><br>0,56        |
| 45 kDa calcium-binding protein precursor                           | Q9BRK5 CAB45_HUMAN  | <b>1,40</b><br><b>1,24</b> | 0,79<br>0,89               | <b>0,67</b> |                            |                            |                            |                            |                            |                            |
| 4F2 cell-surface antigen heavy chain                               | P08195 4F2_HUMAN    | <b>1,30</b><br><b>1,13</b> | 0,98<br>1,05               | 1,05        | <b>1,58</b><br>7,73        | 1,07<br>3,36               | <b>1,45</b>                |                            |                            |                            |
| 4-trimethylaminobutyraldehyde dehydrogenase                        | P49189 AL9A1_HUMAN  | 1,04<br>0,99               | 1,01<br>0,96               | 0,82        | 1,02<br>1,04               | 0,91<br><b>1,37</b>        | 1,00<br>1,24               |                            |                            |                            |
| 5'-3' exonuclease 2                                                | Q9H0D6 XRN2_HUMAN   |                            |                            |             |                            |                            |                            | 0,86                       | 0,13                       | 0,10                       |

|                                                                   |                     |                            |                            |                     |                            |                            |                            |                            |                            |                            |
|-------------------------------------------------------------------|---------------------|----------------------------|----------------------------|---------------------|----------------------------|----------------------------|----------------------------|----------------------------|----------------------------|----------------------------|
|                                                                   |                     |                            |                            | 0,00                | 0,00                       | 0,00                       | 0,91                       | 0,51                       | <b>0,30</b>                |                            |
| 5-formyltetrahydrofolate cyclo-ligase                             | P49914 MTHFS_HUMAN  | 1,07                       | 0,93                       |                     |                            |                            |                            |                            |                            |                            |
| 5-oxoprolinase                                                    | O14841 OPLA_HUMAN   |                            |                            | 1,20                |                            | 0,65                       |                            |                            |                            |                            |
| 6,8 kDa mitochondrial proteolipid                                 | P56378 68MP_HUMAN   | 0,83                       | 1,05                       |                     |                            |                            |                            |                            |                            |                            |
| 60 kDa heat shock protein, mitochondrial precursor                | P10809 CH60_HUMAN   | <b>0,89</b><br>1,01        | 0,95<br>1,01               | <b>0,83</b>         | <b>2,14</b><br>1,96        | <b>1,46</b><br>1,37        | <b>3,30</b><br>2,19        | <b>0,72</b><br>0,94        | <b>2,18</b><br><b>1,77</b> | <b>4,72</b><br><b>4,05</b> |
| 60S acidic ribosomal protein P0                                   | P05388 RLA0_HUMAN   | 0,87<br>1,09               | <b>1,19</b><br><b>1,16</b> | <b>1,52</b>         |                            |                            |                            |                            |                            |                            |
| 60S acidic ribosomal protein P0 (Fragment)                        | Q53HK9 Q53HK9_HUMAN |                            |                            |                     | 1,12<br>0,99               | <b>0,79</b><br><b>0,71</b> | 1,00<br><b>0,78</b>        | 1,00<br>1,14               | <b>1,60</b><br><b>1,28</b> | <b>1,53</b><br><b>1,53</b> |
| 60S ribosomal protein L10                                         | P27635 RL10_HUMAN   | 0,89                       | <b>1,41</b>                | <b>2,35</b>         |                            |                            |                            |                            | <b>0,49</b>                | <b>0,52</b><br><b>0,67</b> |
| 60S ribosomal protein L10a                                        | P62906 RL10A_HUMAN  | 0,94<br>1,14               | 1,08<br><b>1,23</b>        | <b>1,41</b>         | 1,01<br>0,93               | <b>0,76</b><br><b>0,82</b> | 0,88<br>0,73               | 0,94<br><b>1,28</b>        | <b>1,54</b><br><b>1,24</b> | <b>1,21</b><br><b>1,69</b> |
| 60S ribosomal protein L12                                         | P30050 RL12_HUMAN   |                            |                            |                     |                            |                            |                            |                            | <b>0,85</b>                | <b>1,51</b><br><b>1,26</b> |
| 60S ribosomal protein L13                                         | Q6NZ55 Q6NZ55_HUMAN | 1,20<br>0,00               | 1,27<br>0,00               | 2,37<br>0,00        | 1,00<br>1,65               | <b>0,71</b><br>0,95        | <b>0,51</b><br>0,75        | 1,04                       | <b>1,59</b>                | 0,91                       |
| 60S ribosomal protein L13                                         | Q567Q8 Q567Q8_HUMAN | 0,69<br>0,00               | 0,98<br>0,00               | 1,29<br>0,00        |                            |                            |                            |                            |                            |                            |
| 60S ribosomal protein L13a                                        | P40429 RL13A_HUMAN  |                            |                            |                     | 1,48                       | 0,87                       | <b>0,53</b>                | 1,17                       | 1,28                       | 1,22                       |
| 60S ribosomal protein L14                                         | P50914 RL14_HUMAN   | <b>1,52</b>                | 1,09                       |                     |                            |                            |                            |                            |                            |                            |
| 60S ribosomal protein L17                                         | P18621 RL17_HUMAN   | <b>0,85</b><br>1,17        | <b>1,42</b><br>1,49        | <b>2,53</b>         |                            |                            |                            |                            | 0,00                       | 0,00<br>0,00               |
| 60S ribosomal protein L18                                         | Q07020 RL18_HUMAN   | 1,13<br>1,04               | 1,20<br><b>1,20</b>        | <b>1,64</b>         | 0,97<br>1,23               | <b>0,86</b><br>0,99        | <b>0,71</b><br>1,04        | <b>0,89</b><br><b>0,58</b> | <b>0,65</b><br><b>0,83</b> | <b>0,62</b><br><b>1,14</b> |
| 60S ribosomal protein L18a                                        | Q02543 RL18A_HUMAN  | 1,09<br><b>1,15</b>        | 1,13<br><b>1,10</b>        | <b>1,44</b>         |                            |                            |                            |                            |                            |                            |
| 60S ribosomal protein L19                                         | P84098 RL19_HUMAN   | <b>0,74</b>                | 0,91                       | <b>1,17</b>         | 1,02                       | <b>0,78</b>                | <b>0,71</b>                | 0,98<br>1,00               | <b>0,75</b><br><b>0,58</b> | <b>0,75</b><br><b>0,76</b> |
| 60S ribosomal protein L21                                         | P46778 RL21_HUMAN   | 0,81<br>2,34               | <b>1,29</b><br>1,51        | <b>2,06</b>         | 1,04                       | <b>0,79</b>                | <b>0,69</b>                | 0,96<br><b>0,55</b>        | 0,99<br><b>0,69</b>        | <b>0,75</b><br><b>0,77</b> |
| 60S ribosomal protein L22                                         | P35268 RL22_HUMAN   |                            |                            |                     |                            |                            |                            |                            | <b>0,72</b>                | <b>1,67</b><br><b>1,39</b> |
| 60S ribosomal protein L23                                         | P62829 RL23_HUMAN   | <b>1,70</b>                | 1,63                       |                     |                            |                            |                            |                            |                            |                            |
| 60S ribosomal protein L23a                                        | P62750 RL23A_HUMAN  | 0,94                       | <b>1,35</b>                | <b>2,03</b>         | 0,93<br>0,86               | <b>0,85</b><br>0,99        | 0,94<br>1,17               | <b>0,59</b><br><b>0,90</b> | <b>0,48</b><br><b>1,65</b> | <b>0,37</b><br><b>1,50</b> |
| 60S ribosomal protein L24                                         | P83731 RL24_HUMAN   | 0,95                       | 1,25                       | <b>2,31</b>         | 0,89<br>1,26               | <b>0,75</b><br><b>0,84</b> | <b>0,69</b><br><b>0,82</b> | 0,95<br>0,98               | 0,95<br>0,96               | 0,82<br>1,10               |
| 60S ribosomal protein L26                                         | P61254 RL26_HUMAN   |                            |                            |                     | 1,06                       | <b>0,84</b>                | <b>0,82</b>                | <b>0,88</b>                | 1,11                       | <b>0,63</b><br><b>0,82</b> |
| 60S ribosomal protein L26-like 1                                  | Q9UNX3 RL26L_HUMAN  | 1,75<br>0,86               | 1,27<br>1,23               | <b>2,20</b>         |                            |                            |                            |                            |                            |                            |
| 60S ribosomal protein L27                                         | P61353 RL27_HUMAN   |                            |                            |                     | 1,11<br><b>1,27</b>        | 1,02<br>0,84               | 0,98<br>0,88               |                            |                            |                            |
| 60S ribosomal protein L27a                                        | P46776 RL27A_HUMAN  | 1,06<br><b>1,41</b>        | 1,04<br>1,17               | <b>1,40</b>         | 1,16<br>1,04               | 1,07<br>1,17               |                            | 0,81<br>1,07               | <b>1,47</b><br>1,14        | 0,88<br>1,14               |
| 60S ribosomal protein L28                                         | P46779 RL28_HUMAN   |                            |                            |                     | 1,17<br>0,98               | 0,74<br>0,92               | 0,65<br><b>0,69</b>        | 0,80<br><b>1,19</b>        | 0,49<br>1,01               | 0,91<br>0,94               |
| 60S ribosomal protein L3                                          | P39023 RL3_HUMAN    | 0,84<br>1,47               | <b>1,31</b><br>1,18        | <b>2,11</b>         | 1,28<br>1,18               | 0,92<br>0,92               |                            | <b>0,38</b>                | <b>0,58</b>                | <b>0,61</b>                |
| 60S ribosomal protein L30                                         | P62888 RL30_HUMAN   |                            |                            |                     |                            |                            |                            |                            |                            |                            |
| 60S ribosomal protein L31                                         | P62899 RL31_HUMAN   | <b>1,19</b><br>1,03        | <b>1,39</b><br>1,10        | <b>1,41</b>         | 1,32<br><b>1,49</b>        | 1,00<br>1,01               | <b>1,36</b><br>1,02        | <b>0,84</b><br>1,06        | <b>1,68</b><br><b>1,46</b> | 1,06<br><b>1,51</b>        |
| 60S ribosomal protein L32                                         | P62910 RL32_HUMAN   | <b>1,52</b><br><b>0,81</b> | <b>1,55</b><br>1,16        | <b>1,51</b>         | 1,06<br><b>1,30</b>        | <b>0,81</b><br>0,97        | <b>0,79</b><br>1,09        | <b>0,85</b><br><b>1,66</b> | <b>1,49</b><br><b>1,50</b> | 0,95<br><b>1,75</b>        |
| 60S ribosomal protein L34                                         | P49207 RL34_HUMAN   | <b>1,40</b><br>0,00        | 1,47<br>0,00               | 0,00                |                            |                            |                            | 0,91                       | 1,29                       | 0,70                       |
| 60S ribosomal protein L35                                         | P42766 RL35_HUMAN   | 0,87<br>1,15               | 1,21<br>1,21               | <b>2,76</b>         | 0,96<br>1,10               | 0,95<br>1,11               | 1,02<br>0,98               | 0,90<br><b>0,35</b>        | <b>2,39</b><br>1,16        | <b>2,24</b><br>1,20        |
| 60S ribosomal protein L35a                                        | P42766 RL35_HUMAN   | 0,77<br>1,15               | 1,47<br>1,21               | 2,77                | 0,00                       | 0,00                       | 0,00                       | 0,86                       | <b>0,75</b>                | <b>0,53</b>                |
| 60S ribosomal protein L36                                         | P18077 RL36_HUMAN   | 0,77<br>1,15               | 1,47<br><b>1,24</b>        | 2,77<br><b>1,53</b> | 1,09                       | 0,91                       | 0,69                       | <b>1,45</b><br><b>0,40</b> | <b>1,87</b><br><b>0,68</b> | <b>1,37</b><br><b>0,67</b> |
| 60S ribosomal protein L36a-like                                   | Q9Y3U8 RL36L_HUMAN  | 1,04<br>1,11               | <b>1,20</b><br><b>1,33</b> | <b>1,92</b>         | 1,09<br>0,97               | 0,91<br><b>0,65</b>        | 0,69<br><b>0,69</b>        | 0,89<br>1,12               | 1,41<br>1,11               | 0,96<br><b>1,49</b>        |
| 60S ribosomal protein L38                                         | Q969Q0 RL38_HUMAN   | 1,11<br><b>1,37</b>        | <b>1,33</b><br><b>1,21</b> | <b>1,92</b>         | 0,87<br>1,20               | 0,86<br>0,94               | 0,97<br>0,88               | 1,12<br><b>0,93</b>        | 1,11<br>0,94               | <b>1,49</b><br>0,80        |
| 60S ribosomal protein L38a-like                                   | Q969Q0 RL38L_HUMAN  |                            |                            |                     |                            |                            |                            |                            |                            |                            |
| 60S ribosomal protein L4                                          | P63173 RL4_HUMAN    |                            |                            |                     | 0,93<br><b>0,59</b>        | 0,94<br>0,61               | 0,88<br><b>0,67</b>        | 0,96<br>0,00               | 0,41<br>0,00               | 0,20<br>0,00               |
| 60S ribosomal protein L6                                          | P36578 RL4_HUMAN    | 0,00<br><b>1,52</b>        | 0,00<br>1,04               | 0,00                |                            |                            |                            |                            |                            |                            |
| 60S ribosomal protein L6                                          | Q9HBB3 Q9HBB3_HUMAN | 0,96<br><b>1,39</b>        | 1,14<br><b>1,16</b>        | <b>1,27</b>         | 1,00<br><b>1,29</b>        | <b>0,81</b><br>1,04        | <b>0,78</b><br>1,07        | 1,00<br><b>0,52</b>        | <b>1,53</b><br>1,03        | <b>1,26</b><br>1,08        |
| 60S ribosomal protein L7                                          | P18124 RL7_HUMAN    | <b>0,90</b>                | 0,98                       | <b>1,26</b>         |                            |                            |                            |                            |                            |                            |
| 60S ribosomal protein L8                                          | P62917 RL8_HUMAN    | 0,95<br><b>1,35</b>        | 1,13<br><b>1,25</b>        | <b>1,40</b>         | 1,17<br><b>1,15</b>        | 0,94<br><b>0,85</b>        | 1,02<br>0,94               | 1,15<br><b>0,74</b>        | <b>1,48</b><br><b>1,18</b> | <b>1,26</b><br>1,09        |
| 60S ribosome subunit biogenesis protein NIP7 homolog              | Q9Y221 NIP7_HUMAN   |                            |                            |                     | 1,29                       | 0,83                       | 1,00                       | 1,20                       | 0,94                       | 0,85                       |
| 6-phosphofructokinase, liver type                                 | P17858 K6PL_HUMAN   | 1,15                       | <b>3,18</b>                | <b>5,67</b>         | <b>0,64</b><br>0,92        | <b>0,75</b><br><b>0,81</b> | <b>0,62</b><br><b>0,66</b> |                            |                            |                            |
| 6-phosphogluconate dehydrogenase, decarboxylating                 | P52209 6PGD_HUMAN   | 1,18<br><b>1,59</b>        | <b>1,80</b><br><b>1,67</b> | <b>3,03</b>         | <b>0,83</b><br><b>0,83</b> | 0,97<br>1,04               | <b>0,92</b><br>0,91        | 1,64                       | 2,30                       | <b>5,94</b>                |
| 6-phosphogluconolactonase                                         | Q95336 6PGL_HUMAN   |                            |                            |                     | 0,80                       | 0,99                       | 0,53                       |                            |                            |                            |
| 70 kDa SHP-1L protein                                             | Q9UK67 Q9UK67_HUMAN | 1,34                       | <b>2,85</b>                | <b>5,75</b>         | <b>0,85</b><br>0,97        | 0,92<br><b>0,84</b>        | <b>0,67</b><br>0,66        | <b>0,49</b>                | 0,96                       | <b>0,61</b>                |
| 78 kDa glucose-regulated protein precursor                        | P11021 GRP78_HUMAN  | <b>0,92</b><br><b>0,95</b> | 1,00<br><b>1,18</b>        | 1,00                | <b>1,78</b><br>1,94        | <b>1,08</b><br>1,28        | <b>2,03</b><br>1,61        | 0,90<br><b>0,88</b>        | <b>3,22</b><br><b>2,70</b> | <b>5,22</b><br><b>4,83</b> |
| 7-dehydrocholesterol reductase                                    | Q9UBM7 DHCR7_HUMAN  | 1,01<br><b>0,85</b>        | 1,16<br><b>1,12</b>        | 1,07                |                            |                            |                            |                            |                            |                            |
| ABC-transporter                                                   | Q96PT8 Q96PT8_HUMAN | 0,96<br>1,12               | 1,11<br><b>1,16</b>        | <b>1,23</b>         |                            |                            |                            |                            |                            |                            |
| Abhydrolase domain-containing protein 10, mitochondrial precursor | Q9NUJ1 ABHDA_HUMAN  | <b>0,78</b><br>0,98        | <b>0,86</b><br>0,97        | <b>0,68</b>         |                            |                            |                            |                            |                            |                            |
| Abhydrolase domain-containing protein 11                          | Q8NFV4 ABHDB_HUMAN  | 1,04<br>0,87               | 0,89<br><b>0,85</b>        | 0,69                |                            |                            |                            |                            |                            |                            |
| Abhydrolase domain-containing protein 12                          | Q8N2K0 ABD12_HUMAN  | 0,99<br>0,82               | 1,16<br>0,98               | 1,54                |                            |                            |                            | 1,23<br>0,51               | <b>1,83</b><br>1,38        | <b>2,90</b><br>2,47        |
| Abhydrolase domain-containing protein 2                           | P08910 ABHD2_HUMAN  | 0,78                       | <b>0,41</b>                | 0,55                |                            |                            |                            |                            |                            |                            |
| Acetolactate synthase-like protein                                | A1L0T0 ILVBL_HUMAN  | 1,05<br>0,92               | <b>1,27</b><br><b>1,16</b> | <b>1,45</b>         |                            |                            |                            |                            |                            |                            |
| Acetyl-CoA acetyltransferase, cytosolic                           | Q9BWD1 THIC_HUMAN   |                            |                            |                     | <b>0,86</b><br>0,90        | <b>0,79</b><br>0,97        | <b>0,80</b><br><b>0,82</b> |                            |                            |                            |
| Acetyl-CoA acetyltransferase, mitochondrial precursor             | P24752 THIL_HUMAN   | <b>0,83</b><br><b>1,12</b> | <b>0,76</b><br><b>0,89</b> | <b>0,66</b>         | 1,56                       | 1,32                       | 1,74                       |                            |                            |                            |
| Acetyl-coenzyme A synthetase 2-like, mitochondrial precursor      | Q9NUB1 ACS2L_HUMAN  | 0,00                       | 0,00                       | 0,00                |                            |                            |                            |                            |                            |                            |
| Acid ceramidase precursor                                         | Q13510 ASAH1_HUMAN  | 1,02<br>1,03               | 1,00<br>1,09               | 0,86                |                            |                            |                            |                            |                            |                            |
| Acid phosphatase 1 isoform c variant (Fragment)                   | Q59EH3 Q59EH3_HUMAN |                            |                            |                     | <b>1,53</b>                | 0,99                       | 1,12                       |                            |                            |                            |
|                                                                   |                     |                            |                            |                     | 0,50                       | 0,94                       | 0,30                       |                            |                            |                            |

|                                                                         |                     |             |             |              |             |             |             |                                     |
|-------------------------------------------------------------------------|---------------------|-------------|-------------|--------------|-------------|-------------|-------------|-------------------------------------|
|                                                                         | Q92688 AN32B_HUMAN  |             |             |              | 1,11        | 0,96        | 0,75        |                                     |
| Acidic leucine-rich nuclear phosphoprotein 32 family member B           |                     |             |             |              | 0,79        | 0,91        | 0,73        |                                     |
| Acidic ribosomal phosphoprotein P1                                      | Q7Z612 Q7Z612_HUMAN | 1,02        | 1,02        |              |             |             |             |                                     |
| ACLY variant protein (Fragment)                                         | Q4LE36 Q4LE36_HUMAN | 1,04        | 2,05        | 6,42         | <b>0,81</b> | 1,05        | <b>0,87</b> |                                     |
|                                                                         |                     |             |             |              | 0,97        | <b>1,17</b> | 1,06        |                                     |
| Aconitase 1, soluble                                                    | Q5VZA7 Q5VZA7_HUMAN |             |             |              | <b>0,86</b> | 0,92        | <b>0,75</b> |                                     |
| Aconitate hydratase, mitochondrial precursor                            | Q99798 ACON_HUMAN   | 0,97        | 0,94        | <b>0,66</b>  | <b>1,74</b> | <b>1,55</b> | <b>2,38</b> |                                     |
|                                                                         |                     | <b>0,93</b> | <b>0,91</b> |              | 2,19        | 1,75        | 2,25        |                                     |
| ACTA2 protein (Fragment)                                                | Q13707 Q13707_HUMAN |             |             |              | 0,95        | 0,83        | 0,85        |                                     |
|                                                                         |                     | 0,00        | 0,00        |              |             |             |             | 0,62 <b>0,81</b> 0,66               |
| Actin related protein 2/3 complex                                       | Q2LE71 Q2LE71_HUMAN | <b>2,32</b> | <b>2,31</b> | <b>4,79</b>  | 0,94        | <b>0,89</b> | 1,00        | 1,04 <b>1,76</b> <b>1,39</b>        |
|                                                                         |                     |             |             |              | 0,93        | 0,93        | 0,83        | <b>1,40</b> <b>1,35</b> <b>1,19</b> |
| Actin, beta (Fragment)                                                  | Q8WVW5 Q8WVW5_HUMAN | <b>1,44</b> | <b>1,82</b> | <b>4,53</b>  |             |             |             | <b>0,91</b> <b>0,62</b> 0,90        |
| Actin, beta (Fragment)                                                  | Q96HG5 Q96HG5_HUMAN |             |             |              |             |             |             |                                     |
|                                                                         |                     | <b>1,36</b> | <b>1,48</b> |              |             |             |             |                                     |
| Actinin alpha 1 isoform b                                               | Q1HE25 Q1HE25_HUMAN | <b>1,68</b> | 1,28        | <b>2,08</b>  | <b>0,84</b> | <b>1,23</b> | <b>1,53</b> |                                     |
|                                                                         |                     | <b>2,27</b> | 1,29        |              | 0,93        | <b>1,22</b> | <b>1,24</b> | <b>0,41</b> <b>0,31</b> 0,25        |
| Actin-like protein (Fragment)                                           | Q562Y8 Q562Y8_HUMAN |             |             |              | 0,00        | 0,00        | 0,00        |                                     |
| Actin-like protein (Fragment)                                           | Q562Z4 Q562Z4_HUMAN |             |             |              | 0,00        | 0,00        | 0,00        |                                     |
| Actin-like protein (Fragment)                                           | Q562Z6 Q562Z6_HUMAN |             |             |              |             |             |             |                                     |
|                                                                         |                     |             |             |              | 0,00        | 0,00        | 0,00        |                                     |
| Actin-related protein 2                                                 | P61160 ARP2_HUMAN   | <b>2,08</b> | <b>1,84</b> | <b>3,46</b>  | 0,93        | 0,96        | <b>1,17</b> | 1,03 1,18 <b>1,45</b>               |
|                                                                         |                     | <b>1,57</b> | <b>1,47</b> |              | 0,99        | 1,01        | 0,98        | 0,88 1,18 1,16                      |
| Actin-related protein 2/3 complex subunit 1B                            | O15143 ARC1B_HUMAN  | <b>1,84</b> | <b>1,88</b> | <b>4,12</b>  | 1,02        | 1,13        | 1,10        | 1,12 1,08 1,69                      |
|                                                                         |                     | <b>1,37</b> | 1,35        |              | 1,12        | 1,26        | 1,07        | <b>0,35</b> 1,08 0,98               |
| Actin-related protein 2/3 complex subunit 2                             | O15144 ARPC2_HUMAN  | 1,37        | 1,24        | 1,92         | 1,06        | <b>1,15</b> | <b>1,25</b> | <b>0,86</b> <b>1,52</b> 1,21        |
|                                                                         |                     | 1,23        | 1,21        |              | 1,14        | 1,12        | <b>1,67</b> | 1,16 <b>1,27</b> 1,19               |
| Actin-related protein 2/3 complex subunit 4                             | P59998 ARPC4_HUMAN  | 0,84        | 0,81        | 1,29         | <b>1,23</b> | <b>1,28</b> | <b>1,65</b> | 0,98 <b>1,70</b> 1,25               |
|                                                                         |                     | <b>1,39</b> | 1,28        |              | <b>0,79</b> | 0,97        | <b>1,49</b> | 1,43 1,13 0,89                      |
| Actin-related protein 2/3 complex subunit 5                             | O15611 ARPC5_HUMAN  | <b>1,82</b> | <b>1,93</b> | <b>3,48</b>  | <b>0,84</b> | <b>0,90</b> | 1,04        | 0,99 <b>1,87</b> <b>1,47</b>        |
|                                                                         |                     | <b>1,51</b> | 1,21        |              | <b>0,77</b> | 0,92        | 0,93        | <b>1,56</b> <b>1,63</b> <b>1,42</b> |
| Actin-related protein 2/3 complex subunit 5-like protein                | Q9BPX5 ARP5L_HUMAN  |             |             |              |             |             |             | 0,86 <b>2,01</b> <b>1,53</b>        |
| Activated RNA polymerase II transcription cofactor 4 variant (Fragment) | Q59G24 Q59G24_HUMAN | 1,35        | 1,58        |              | 0,72        | 0,73        | 0,67        | <b>1,17</b> <b>2,54</b> <b>2,73</b> |
|                                                                         |                     |             |             |              | <b>0,69</b> | 0,88        | 1,07        |                                     |
| Activator of 90 kDa heat shock protein ATPase homolog 1                 | O95433 AHSA1_HUMAN  |             |             |              | 1,12        | 1,15        | 1,05        |                                     |
|                                                                         |                     |             |             |              | 0,00        | 0,00        | 0,00        |                                     |
| Activin receptor interacting protein 5                                  | Q49SH3 Q49SH3_HUMAN | 0,99        | 0,90        | 0,89         |             |             |             | 0,91 1,46 2,09                      |
|                                                                         |                     | 1,02        | 1,06        |              |             |             |             | 2,13 2,13 4,21                      |
| Activity-dependent neuroprotector homeobox protein                      | Q9H2P0 ADNP_HUMAN   |             |             |              |             |             |             | 0,00 0,00 0,00                      |
| Acyl carrier protein, mitochondrial precursor                           | O14561 ACPM_HUMAN   | 1,05        | 1,14        | <b>0,74</b>  | 1,13        | <b>1,82</b> | 1,75        | 1,03 1,26 <b>1,68</b>               |
|                                                                         |                     | 1,09        | 1,12        |              |             |             |             |                                     |
| Acylamino-acid-releasing enzyme                                         | P13798 ACPH_HUMAN   |             |             |              | 1,04        | 1,19        | 1,12        |                                     |
|                                                                         |                     |             |             |              | 0,74        | 1,46        | 1,01        |                                     |
| Acyl-CoA dehydrogenase family member 9, mitochondrial precursor         | Q9H845 ACAD9_HUMAN  | <b>0,84</b> | <b>0,82</b> | <b>0,77</b>  |             |             |             |                                     |
|                                                                         |                     | 0,98        | 1,02        |              |             |             |             |                                     |
| Acyl-CoA synthetase family member 2, mitochondrial precursor            | Q96CM8 ACSF2_HUMAN  | 1,21        | 1,25        | 1,05         |             |             |             |                                     |
|                                                                         |                     | 0,92        | <b>0,86</b> |              |             |             |             |                                     |
| Acyl-CoA synthetase family member 3, mitochondrial precursor            | Q4G176 ACSF3_HUMAN  | 1,12        | 0,86        | 0,79         |             |             |             |                                     |
|                                                                         |                     | 1,00        | 0,94        |              |             |             |             |                                     |
| Acyl-CoA synthetase long-chain family member 4                          | Q5JWV8 Q5JWV8_HUMAN |             |             |              |             |             |             |                                     |
|                                                                         |                     | 1,06        | 0,98        |              |             |             |             |                                     |
| Acyl-CoA synthetase short-chain family member 1                         | Q7Z5G3 Q7Z5G3_HUMAN |             |             |              |             |             |             |                                     |
|                                                                         |                     | 1,01        | <b>0,89</b> |              |             |             |             |                                     |
| Acyl-CoA:lysophosphatidylglycerol acyltransferase 1                     | Q92604 LGAT1_HUMAN  |             |             |              |             |             |             |                                     |
|                                                                         |                     | 0,90        | 1,05        |              |             |             |             |                                     |
| Acyl-CoA-binding domain-containing protein 5                            | Q5T8D3 ACBD5_HUMAN  |             |             |              |             |             |             |                                     |
|                                                                         |                     | 0,00        | <b>0,00</b> |              |             |             |             |                                     |
| Acyl-CoA-binding protein                                                | P07108 ACBP_HUMAN   |             |             |              | <b>0,77</b> | 0,95        | <b>0,83</b> |                                     |
|                                                                         |                     | 0,99        | 1,12        |              | 0,54        | <b>0,72</b> | <b>0,68</b> |                                     |
| Acyl-Coenzyme A dehydrogenase, C-4 to C-12 straight chain               | Q5T4U5 Q5T4U5_HUMAN | <b>0,89</b> | <b>0,85</b> | <b>0,80</b>  | 0,96        | 1,26        | 1,53        |                                     |
| Acyl-Coenzyme A dehydrogenase, short/branched chain                     | Q5SQN6 Q5SQN6_HUMAN | <b>0,91</b> | <b>0,94</b> |              | 1,52        | 1,07        | 1,38        |                                     |
|                                                                         |                     | 1,00        | 0,90        |              |             |             |             |                                     |
| Acyl-Coenzyme A dehydrogenase, very long chain variant (Fragment)       | Q53HR2 Q53HR2_HUMAN |             |             |              | 2,14        | 1,48        | 1,80        | 0,86 <b>2,88</b> <b>5,11</b>        |
|                                                                         |                     |             |             |              | <b>2,56</b> | 1,25        | 1,47        | 0,76 <b>2,63</b> <b>2,81</b>        |
| Acyl-coenzyme A oxidase 1, peroxisomal                                  | Q15067 ACOX1_HUMAN  |             |             |              |             |             |             |                                     |
|                                                                         |                     | 0,92        | 0,97        |              |             |             |             |                                     |
| Acyl-coenzyme A oxidase 3, peroxisomal                                  | O15254 ACOX3_HUMAN  | 0,91        | 0,88        | <b>0,76</b>  |             |             |             |                                     |
|                                                                         |                     | 1,08        | 1,00        |              |             |             |             |                                     |
| Acyl-coenzyme A thioesterase 9                                          | Q9Y305 ACOT9_HUMAN  | 1,00        | 1,24        | 0,82         |             |             |             |                                     |
|                                                                         |                     | 1,03        | 1,04        |              |             |             |             |                                     |
| Acylglycerol kinase, mitochondrial precursor                            | Q53H12 AGK_HUMAN    | 0,85        | 0,88        | <b>0,74</b>  |             |             |             |                                     |
|                                                                         |                     | 0,94        | 0,99        |              |             |             |             |                                     |
| ADAM 10 precursor                                                       | O14672 ADA10_HUMAN  | 1,00        | 0,65        | 0,74         |             |             |             |                                     |
|                                                                         |                     | 0,96        | 0,96        |              |             |             |             |                                     |
| Adaptin ear-binding coat-associated protein 2                           | Q9NVZ3 NECP2_HUMAN  |             |             |              |             |             |             |                                     |
|                                                                         |                     |             |             |              | 0,89        | 0,89        | 0,82        |                                     |
| Adaptor-related protein complex 2, alpha 2 subunit variant (Fragment)   | Q53ET1 Q53ET1_HUMAN |             |             |              |             |             |             |                                     |
|                                                                         |                     | 1,06        | <b>0,82</b> |              |             |             |             |                                     |
| Adenine phosphoribosyltransferase                                       | P07741 APT_HUMAN    | 0,99        | <b>4,66</b> | <b>11,01</b> | 0,93        | 0,99        | 0,91        |                                     |
|                                                                         |                     |             |             |              | <b>0,74</b> | 0,89        | <b>0,68</b> |                                     |
| Adenosine 3'-phospho 5'-phosphosulfate transporter 1                    | Q8TB61 S35B2_HUMAN  | <b>0,52</b> | 0,64        | 0,84         |             |             |             |                                     |
|                                                                         |                     | 1,03        | 1,00        |              |             |             |             |                                     |
| Adenosine deaminase, RNA-specific isoform ADAR-a variant (Fragment)     | Q59EC0 Q59EC0_HUMAN |             |             |              |             |             |             | 0,82 <b>0,30</b> <b>0,27</b>        |
|                                                                         |                     |             |             |              | <b>0,32</b> | <b>0,32</b> | <b>0,21</b> |                                     |
| Adenosine kinase                                                        | Q86U79 Q86U79_HUMAN |             |             |              | 0,79        | 0,97        | 0,87        |                                     |
|                                                                         |                     | 0,97        | <b>0,84</b> |              | 0,93        | 1,16        | <b>0,78</b> |                                     |
| Adenosine monophosphate deaminase 2                                     | Q5T694 Q5T694_HUMAN |             |             |              | 0,96        | 0,98        | 1,25        |                                     |
|                                                                         |                     |             |             |              | <b>0,79</b> | 1,02        | 1,26        |                                     |
| Adenosylhomocysteinase                                                  | P23526 SAHH_HUMAN   |             |             |              | 1,11        | <b>1,25</b> | 1,18        |                                     |
| Adenylate cyclase type 7                                                | P51828 ADCY7_HUMAN  |             |             |              |             |             |             |                                     |
|                                                                         |                     | 1,04        | 0,93        |              |             |             |             |                                     |
| Adenylate kinase 2                                                      | Q5EB54 Q5EB54_HUMAN | 0,80        | <b>0,63</b> | <b>0,25</b>  | <b>1,61</b> | <b>2,00</b> | <b>1,83</b> |                                     |
|                                                                         |                     |             |             |              | <b>1,67</b> | <b>2,33</b> | <b>1,78</b> |                                     |
| Adenylate kinase isoenzyme 4, mitochondrial                             | P27144 KAD4_HUMAN   | 0,00        | 0,00        | 0,00         |             |             |             |                                     |
|                                                                         |                     | 1,06        | 0,92        |              |             |             |             |                                     |
| Adenylosuccinate lyase                                                  | P30566 PUR8_HUMAN   |             |             |              |             |             |             |                                     |
|                                                                         |                     |             |             |              | 0,92        | 0,80        | 1,20        |                                     |
| Adenylosuccinate synthetase isozyme 2                                   | P30520 PURA2_HUMAN  |             |             |              | 0,83        | 0,91        | 0,92        |                                     |
| Adenylyl cyclase-associated protein                                     | Q5T0S2 Q5T0S2_HUMAN | 1,26        | 1,00        | 2,15         |             |             |             |                                     |
|                                                                         |                     |             |             |              | 0,94        | 1,10        | <b>1,33</b> |                                     |
| Adenylyl cyclase-associated protein 1                                   | Q01518 CAP1_HUMAN   |             |             |              | <b>0,89</b> | 1,06        | <b>1,21</b> |                                     |
|                                                                         |                     | 1,55        | 1,34        |              |             |             |             |                                     |
| Adipocyte plasma membrane-associated protein                            | Q9HDC9 APMAP_HUMAN  | 0,88        | 1,05        | 1,10         |             |             |             |                                     |
|                                                                         |                     | <b>0,94</b> | <b>1,16</b> |              |             |             |             |                                     |
| ADP,ATP carrier protein, liver isoform T2 variant (Fragment)            | Q59EI9 Q59EI9_HUMAN | 0,88        | 0,97        | <b>0,74</b>  |             |             |             |                                     |
|                                                                         |                     | 0,97        | 0,86        |              |             |             |             |                                     |
| ADP/ATP translocase 2                                                   | P05141 ADT2_HUMAN   | 0,92        | <b>0,89</b> | <b>0,80</b>  |             |             |             | 1,43 1,99 6,16                      |
|                                                                         |                     | 1,08        | 0,89        |              |             |             |             |                                     |
| ADP-dependent glucokinase                                               | Q9BRR6 ADPGK_HUMAN  | 0,81        | 0,93        | 0,90         |             |             |             |                                     |

|                                                                        |                     |                     |                            |             |                            |                            |                            |                            |                                                       |
|------------------------------------------------------------------------|---------------------|---------------------|----------------------------|-------------|----------------------------|----------------------------|----------------------------|----------------------------|-------------------------------------------------------|
|                                                                        |                     | 0,95                | 0,97                       |             |                            |                            |                            |                            |                                                       |
| ADP-ribose pyrophosphatase, mitochondrial precursor                    | Q9BW91 NUDT9_HUMAN  | 1,07                | 0,99                       |             |                            |                            |                            |                            |                                                       |
| ADP-ribosyl cyclase 2 precursor                                        | Q10588 BST1_HUMAN   |                     |                            |             |                            |                            |                            | <b>1,36</b>                | <b>0,77</b> 0,86                                      |
| ADP-ribosylation factor 3                                              | P61204 ARF3_HUMAN   | 1,21<br><b>1,48</b> | <b>1,30</b><br><b>1,26</b> | <b>2,58</b> | 1,22<br>0,88               | <b>1,41</b><br>0,96        | <b>1,31</b><br>0,57        | 1,38                       | <b>3,85</b> <b>5,11</b>                               |
| ADP-ribosylation factor 4                                              | P18085 ARF4_HUMAN   | 0,77                | 2,38                       | <b>5,40</b> |                            |                            |                            |                            |                                                       |
| ADP-ribosylation factor 5                                              | P84085 ARF5_HUMAN   |                     |                            |             | 0,78                       | 1,08                       | 0,69                       |                            |                                                       |
| ADP-ribosylation factor GTPase-activating protein 2                    | Q8N6H7 ARFG2_HUMAN  |                     |                            |             | 0,56                       | <b>0,66</b>                | 0,37                       |                            |                                                       |
| ADP-ribosylation factor-like protein 15                                | Q9NXU5 ARL15_HUMAN  | 1,25                | 1,13                       |             |                            |                            |                            |                            |                                                       |
| ADP-ribosylation factor-like protein 6-interacting protein 1           | Q15041 AR6P1_HUMAN  | <b>0,77</b>         | 1,09                       | <b>1,07</b> |                            |                            |                            |                            |                                                       |
| ADP-ribosylation factor-like protein 6-interacting protein 4           | Q66PJ3 AR6P4_HUMAN  |                     |                            |             |                            |                            |                            | 0,00                       | 0,00 0,00                                             |
| ADP-ribosylation factor-like protein 8A                                | Q96BM9 ARL8A_HUMAN  | 1,35<br>1,65        | 1,62<br>1,14               | 1,58        |                            |                            |                            |                            |                                                       |
| ADP-ribosylation factor-like protein 8B                                | Q9NVJ2 ARL8B_HUMAN  | 1,06<br>1,18        | <b>1,22</b><br>1,04        | 1,09        |                            |                            |                            |                            |                                                       |
| ADP-ribosylation factor-like 3                                         | Q5JSM2 Q5JSM2_HUMAN |                     |                            |             | 0,72                       | 0,91                       | 0,61                       |                            |                                                       |
| Adrenodoxin, mitochondrial precursor                                   | P10109 ADX_HUMAN    | <b>0,78</b><br>0,96 | <b>0,61</b><br><b>0,86</b> | <b>0,41</b> | <b>2,04</b><br><b>1,60</b> | <b>1,44</b><br>1,01        | <b>1,85</b><br><b>1,64</b> | 0,00                       | 0,00 0,00                                             |
| Adrenodoxin-like protein, mitochondrial precursor                      | Q6P4F2 ADXL_HUMAN   | 0,59                | 0,68                       |             |                            |                            |                            |                            |                                                       |
| Aflatoxin B1 aldehyde reductase member 2                               | O43488 ARK72_HUMAN  | 0,94<br>1,00        | 0,94<br>1,01               | 0,85        | 0,93<br>0,93               | 1,03<br>0,90               | <b>1,25</b><br>0,82        |                            |                                                       |
| Aging-associated gene 6 protein                                        | Q2TSD3 Q2TSD3_HUMAN | 4,20                | 7,49                       | 11,67       | <b>1,39</b><br><b>1,30</b> | 1,12<br>0,99               | 0,95<br>1,05               |                            |                                                       |
| Aging-associated gene 7 protein                                        |                     |                     |                            |             |                            |                            |                            | 0,00                       | 0,00 0,00                                             |
| Aging-associated protein 2                                             | Q2TU77 Q2TU77_HUMAN |                     |                            |             | <b>0,81</b><br><b>0,60</b> | <b>0,88</b><br><b>0,76</b> | 0,84<br>0,85               |                            |                                                       |
| AH receptor-interacting protein                                        | O00170 AIP_HUMAN    |                     |                            |             | 0,99                       | 1,03                       | 0,91                       |                            |                                                       |
| AHCY protein                                                           | Q1RMG2 Q1RMG2_HUMAN |                     |                            |             | 0,82                       | 1,05                       | 1,10                       |                            |                                                       |
| AKAP8 protein                                                          | Q8NE02 Q8NE02_HUMAN |                     |                            |             |                            |                            |                            | 0,94                       | 1,04 1,08                                             |
| A-kinase anchor protein 13                                             | Q12802 AKP13_HUMAN  |                     |                            |             | 0,93                       | 1,03                       | 0,88                       |                            |                                                       |
| AKR1A1 protein                                                         | Q6IAZ4 Q6IAZ4_HUMAN |                     |                            |             | 0,85<br><b>0,89</b>        | 0,91<br><b>0,89</b>        | 0,81<br><b>0,76</b>        |                            |                                                       |
| AKR1B1 protein                                                         | Q6FGA4 Q6FGA4_HUMAN |                     |                            |             | 0,95<br>0,95               | 1,01<br><b>1,30</b>        | 1,01<br>0,74               |                            |                                                       |
| Alanyl-tRNA synthetase, cytoplasmic                                    | P49588 SYAC_HUMAN   | 1,04                | 1,01                       |             | <b>0,88</b><br>0,92        | <b>0,82</b><br>1,03        | <b>0,77</b><br>0,81        |                            |                                                       |
| Alcohol dehydrogenase 5 (Class III), chi polypeptide                   | Q6IRT1 Q6IRT1_HUMAN |                     |                            |             | 0,88                       | 0,96                       | 0,95                       |                            |                                                       |
| Aldehyde dehydrogenase 1 family, member A1                             | Q5SYR1 Q5SYR1_HUMAN |                     |                            |             | 0,00                       | 0,00                       | 0,00                       |                            |                                                       |
| Aldehyde dehydrogenase 18 family, member A1                            | Q5T567 Q5T567_HUMAN | 0,96<br>1,01        | 0,86<br>1,00               | <b>0,69</b> |                            |                            |                            |                            |                                                       |
| Aldehyde dehydrogenase 3B1                                             | P43353 AL3B1_HUMAN  | 1,26<br>0,99        | 0,83<br><b>0,86</b>        | 0,88        |                            |                            |                            |                            |                                                       |
| Aldehyde dehydrogenase 4 family, member A1                             | Q5JNV6 Q5JNV6_HUMAN | 0,95<br>1,01        | 0,89<br><b>0,89</b>        | <b>0,75</b> |                            |                            |                            |                            |                                                       |
| Aldehyde dehydrogenase 6A1 variant (Fragment)                          | Q53H94 Q53H94_HUMAN | 1,01                | 0,94                       |             |                            |                            |                            |                            |                                                       |
| Aldehyde dehydrogenase family 16 member A1                             | Q8IZ83 A16A1_HUMAN  |                     |                            |             | 1,03<br>0,96               | 1,02<br>0,91               | 1,16<br>1,19               |                            |                                                       |
| Aldehyde dehydrogenase X, mitochondrial precursor                      | P30837 AL1B1_HUMAN  | 1,05                | 1,07                       |             |                            |                            |                            |                            |                                                       |
| ALDH3A2 protein                                                        | Q6I9T3 Q6I9T3_HUMAN | 0,93<br>1,02        | 1,10<br>1,07               | 1,01        |                            |                            |                            |                            |                                                       |
| Aldose 1-epimerase                                                     | Q96C23 GALM_HUMAN   |                     |                            |             | 0,99<br>0,00               | 0,96<br>0,00               | 0,90<br>0,00               |                            |                                                       |
| Alkylidihydroxyacetonephosphate synthase, peroxisomal precursor        | O00116 ADAS_HUMAN   | 1,05<br>0,94        | 1,00<br>1,00               | <b>0,86</b> |                            |                            |                            | 0,65                       | <b>1,80</b> <b>2,56</b>                               |
| Allograft inflammatory factor 1                                        | Q4V347 Q4V347_HUMAN |                     |                            |             | 0,92<br><b>0,71</b>        | 1,05<br><b>0,72</b>        | 0,91<br><b>0,64</b>        | <b>1,49</b>                | <b>0,44</b> <b>0,40</b>                               |
| Allograft inflammatory factor 1 (Fragment)                             | Q5STX8 Q5STX8_HUMAN |                     |                            |             |                            |                            |                            | <b>0,72</b>                | <b>0,19</b> <b>0,15</b>                               |
| All-trans-retinol 13,14-reductase precursor                            | Q6NUM9 RETST_HUMAN  | 0,91<br>0,99        | 0,66<br>1,07               | 0,57        |                            |                            |                            |                            |                                                       |
| Alpha subunit of GsGTP binding protein (Fragment)                      | Q14455 Q14455_HUMAN | 1,09                | 0,77                       | 0,99        |                            |                            |                            |                            |                                                       |
| Alpha-1,6-mannosyl-glycoprotein 2-beta-N-acetylglucosaminyltransferase | Q10469 MGAT2_HUMAN  | 1,11<br>1,15        | 0,71<br>0,84               | <b>0,64</b> |                            |                            |                            |                            |                                                       |
| Alpha-1-antitrypsin precursor                                          | P01009 A1AT_HUMAN   |                     |                            |             | <b>1,79</b>                | 1,17                       | <b>1,64</b>                |                            |                                                       |
| Alpha-2-HS-glycoprotein precursor                                      | P02765 FETUA_HUMAN  | 1,30                | 1,37                       | 2,24        |                            |                            |                            |                            |                                                       |
| Alpha-2-macroglobulin precursor                                        | P01023 A2MG_HUMAN   | 0,87<br>0,70        | 0,58<br>0,59               | 0,89        |                            |                            |                            |                            |                                                       |
| Alpha-2-macroglobulin receptor-associated protein precursor            | P30533 AMRP_HUMAN   | 1,03<br>1,02        | 0,94<br><b>1,15</b>        | 0,92        | 1,66                       | 0,90                       | 1,50                       | <b>1,54</b><br><b>1,49</b> | <b>6,37</b><br><b>4,93</b> <b>7,92</b><br><b>6,72</b> |
| Alpha-actinin-4                                                        | O43707 ACTN4_HUMAN  |                     |                            |             | 0,90<br>0,86               | <b>1,29</b><br><b>1,25</b> | <b>1,50</b><br><b>1,37</b> | 0,56                       | 0,14 <b>0,11</b>                                      |
| Alpha-centractin                                                       | P61163 ACTZ_HUMAN   |                     |                            |             | 0,88<br>0,91               | 0,91<br>1,16               | <b>1,28</b><br><b>1,40</b> |                            |                                                       |
| Alpha-enolase                                                          | P06733 ENOA_HUMAN   |                     |                            |             | <b>0,84</b><br><b>0,87</b> | 0,96<br>0,99               | <b>0,93</b><br><b>0,84</b> |                            |                                                       |
| Alpha-galactosidase A (Fragment)                                       | Q6LER7 Q6LER7_HUMAN | 1,04<br>0,99        | 1,20<br>0,96               | 1,03        |                            |                            |                            |                            |                                                       |
| Alpha-KG-E2                                                            | Q7LDY7 Q7LDY7_HUMAN | 0,97<br>0,95        | <b>0,88</b><br>1,07        | <b>0,77</b> | 1,74<br><b>2,03</b>        | 0,95<br>1,19               | 1,69<br><b>1,59</b>        | <b>1,48</b><br><b>1,55</b> | <b>2,92</b><br>1,48 <b>5,18</b><br><b>3,62</b>        |
| Alpha-L-iduronidase precursor                                          | P35475 IDUA_HUMAN   | 1,36                | 0,77                       | 1,64        |                            |                            |                            | 0,00                       | 0,00 0,00                                             |
| Alpha-mannosidase 2                                                    | Q16706 MA2A1_HUMAN  | 1,13<br><b>1,18</b> | <b>0,45</b><br>1,02        | <b>0,64</b> |                            |                            |                            |                            |                                                       |
| Alpha-N-acetylgalactosaminidase precursor                              | P17050 NAGAB_HUMAN  | <b>1,48</b><br>0,88 | <b>1,89</b><br>0,95        | <b>1,49</b> | 2,19                       | 1,36                       | 1,66                       |                            |                                                       |
| Alpha-N-acetylglucosaminidase precursor                                | P54802 ANAG_HUMAN   | 0,94                | <b>0,85</b>                |             |                            |                            |                            |                            |                                                       |
| Alpha-N-acetylglucosaminidase                                          | Q14769 Q14769_HUMAN | 1,33                | 1,71                       | 1,38        | <b>1,81</b>                | 1,27                       | 2,26                       |                            |                                                       |
| Alpha-soluble NSF attachment protein                                   | P54920 SNAA_HUMAN   | 0,88<br>0,97        | 1,01<br>0,92               | <b>0,83</b> | 1,13<br>1,15               | 1,10<br>1,04               | <b>1,44</b><br>0,88        |                            |                                                       |
| Alpha-taxilin                                                          | P40222 TXLNA_HUMAN  |                     |                            |             | 0,72                       | <b>0,50</b>                | 0,57                       | 0,89                       | 0,85 0,83                                             |
| Amine oxidase [flavin-containing] B                                    | P27338 AOFB_HUMAN   |                     |                            |             |                            |                            |                            |                            |                                                       |
| Aminopeptidase B                                                       | Q9H4A4 AMPB_HUMAN   | <b>0,87</b>         | 1,01                       |             | 0,52                       | 0,69                       | 0,74                       |                            |                                                       |

|                                                           |                     |                            |                            |             |                            |                            |                            |                            |                            |
|-----------------------------------------------------------|---------------------|----------------------------|----------------------------|-------------|----------------------------|----------------------------|----------------------------|----------------------------|----------------------------|
| Amplified in osteosarcoma                                 | Q9BW99 Q9BW99_HUMAN | 0,83                       | 0,79                       | 0,95        |                            |                            |                            |                            |                            |
| Amyloid-like protein 2 precursor                          | Q06481 APLP2_HUMAN  | 0,73                       | 0,33                       | 0,45        |                            |                            |                            |                            |                            |
| Anamorsin                                                 | Q6FI81 CPIN1_HUMAN  |                            |                            |             | 0,95                       | 0,91                       | 0,83                       |                            |                            |
| Angiotensin-converting enzyme, somatic isoform precursor  | P12821 ACE_HUMAN    | <b>1,35</b><br>1,14        | 1,06<br>0,95               | 1,10        |                            |                            |                            |                            |                            |
| Anion exchanger 2 type a variant (Fragment)               | Q59GF1 Q59GF1_HUMAN | 1,21                       | 0,87                       | 0,98        |                            |                            |                            |                            |                            |
| ANKRD26-like family C member 1A                           | Q6S8J3 A26CA_HUMAN  |                            |                            |             |                            |                            |                            | 1,87                       | 1,28                       |
| ANKRD26-like family C member 1B                           | A5A3E0 A26CB_HUMAN  |                            |                            |             | 0,00                       | 0,00                       | 0,00                       |                            |                            |
| Ankyrin repeat and SAM domain-containing protein 1A       | Q92625 ANS1A_HUMAN  | 0,00<br>0,00               | 0,00<br>0,00               | 0,00        |                            |                            |                            |                            |                            |
| Ankyrin repeat domain-containing protein 35               | Q8N283 ANR35_HUMAN  |                            |                            |             |                            |                            |                            |                            |                            |
| Ankyrin-2                                                 | Q01484 ANK2_HUMAN   | 0,90                       | 1,06                       |             |                            |                            |                            |                            |                            |
| Annexin A1                                                | P04083 ANXA1_HUMAN  | <b>1,95</b><br><b>1,66</b> | <b>2,78</b><br><b>1,88</b> | <b>5,45</b> | <b>1,11</b><br>0,95        | <b>1,08</b><br><b>1,06</b> | <b>1,46</b><br>1,28        | <b>1,66</b><br><b>1,20</b> | <b>4,13</b><br><b>3,37</b> |
| Annexin A11                                               | Q5T0G8 Q5T0G8_HUMAN | <b>1,31</b>                | 1,08                       | <b>1,47</b> |                            |                            |                            |                            |                            |
| Annexin A11 variant (Fragment)                            | Q59EP1 Q59EP1_HUMAN |                            |                            |             | <b>1,28</b>                | 1,00                       | <b>1,38</b>                |                            |                            |
| Annexin A2                                                | P07355 ANXA2_HUMAN  | <b>1,53</b><br>1,87        | <b>1,50</b><br>1,32        | <b>2,52</b> | <b>1,50</b><br><b>1,29</b> | <b>1,17</b><br>0,82        | <b>1,85</b><br><b>1,18</b> | <b>1,39</b><br><b>0,82</b> | <b>1,23</b><br><b>1,07</b> |
| Annexin A5                                                | P08758 ANXA5_HUMAN  | <b>2,42</b><br><b>1,83</b> | <b>3,26</b><br><b>1,95</b> | <b>6,40</b> | 1,06<br>0,95               | 1,02<br><b>1,11</b>        | <b>1,91</b><br>1,74        | <b>1,98</b><br>0,00        | <b>3,03</b><br>0,00        |
| Annexin A6                                                | P08133 ANXA6_HUMAN  | <b>1,70</b>                | <b>1,69</b>                |             |                            |                            |                            |                            |                            |
| Annexin A7                                                | Q5T0M7 Q5T0M7_HUMAN | 1,31                       | 1,27                       | 1,97        | <b>1,14</b><br><b>1,28</b> | <b>1,14</b><br><b>1,20</b> | <b>1,86</b><br><b>1,67</b> |                            |                            |
| Annexin VII isoform 1 variant (Fragment)                  | Q53HM8 Q53HM8_HUMAN | <b>1,74</b>                | 1,52                       |             |                            |                            |                            |                            |                            |
| Antigen KI-67                                             | P46013 KI67_HUMAN   |                            |                            |             |                            |                            |                            | 0,81<br>1,04               | 0,67<br>1,00               |
| ANXA11 protein (Fragment)                                 | Q6ICS0 Q6ICS0_HUMAN | <b>1,29</b>                | <b>1,24</b>                |             | <b>1,32</b>                | <b>0,88</b>                | <b>1,42</b>                | <b>3,16</b><br>0,77        | <b>1,20</b><br>1,15        |
| ANXA4 protein                                             | Q6P452 Q6P452_HUMAN | <b>1,22</b><br><b>1,39</b> | <b>1,20</b><br><b>1,18</b> | <b>1,37</b> | 1,25                       | 1,04                       | 1,47                       |                            |                            |
| ANXA4 protein (Fragment)                                  | Q6LES2 Q6LES2_HUMAN |                            |                            |             | <b>1,28</b>                | 1,07                       | <b>1,91</b>                |                            |                            |
| AP-1 complex subunit gamma-1                              | Q43747 AP1G1_HUMAN  | 1,10                       | 1,00                       |             | 1,24                       | 1,03                       | 1,25                       |                            |                            |
| AP1B1 protein                                             | Q86X54 Q86X54_HUMAN | 1,03<br>1,15               | 0,81<br>0,86               | 0,85        | 1,20<br>1,48               | 1,40<br>1,60               | 1,51<br>1,86               |                            |                            |
| AP-2 complex subunit alpha-1                              | Q95782 AP2A1_HUMAN  | 0,99<br>1,04               | <b>0,62</b><br><b>0,80</b> | <b>0,67</b> |                            |                            |                            | <b>0,43</b>                | <b>0,55</b>                |
| AP-2 complex subunit mu-1                                 | Q96CW1 AP2M1_HUMAN  | 1,12<br><b>1,18</b>        | <b>0,62</b><br><b>0,86</b> | <b>0,59</b> |                            |                            |                            |                            |                            |
| AP-3 complex subunit delta-1                              | O14617 AP3D1_HUMAN  |                            |                            |             |                            |                            |                            | 1,26                       | 1,38                       |
| AP-3 complex subunit sigma-1                              | Q92572 AP3S1_HUMAN  |                            |                            |             | <b>0,48</b>                | 0,67                       | 0,42                       | 1,16                       | 4,58                       |
| APEX nuclease (Multifunctional DNA repair enzyme) 1       | Q5TZP7 Q5TZP7_HUMAN |                            |                            |             | 0,82<br><b>0,68</b>        | 1,01<br>1,04               | <b>0,79</b><br>0,86        | <b>1,10</b><br><b>0,57</b> | <b>0,57</b><br><b>0,58</b> |
| Apolipoprotein A-II precursor                             | P02652 APOA2_HUMAN  | 0,93                       | 1,21                       | <b>2,59</b> |                            |                            |                            |                            |                            |
| Apolipoprotein B-100 receptor                             | Q0VD83 AB48R_HUMAN  |                            |                            |             | <b>1,99</b><br>1,41        | <b>1,48</b><br>1,10        | <b>1,38</b><br>0,98        |                            |                            |
| Apolipoprotein C-I precursor                              | P02654 APOC1_HUMAN  | 0,99<br>0,97               | 0,72<br>1,98               | 0,99        |                            |                            |                            |                            |                            |
| Apolipoprotein E precursor                                | P02649 APOE_HUMAN   | <b>0,76</b><br><b>0,81</b> | <b>0,26</b><br><b>0,68</b> | <b>0,30</b> | 0,96<br>1,21               | 0,44<br>0,38               | 0,63<br><b>0,40</b>        | 1,12<br>1,31               | <b>1,57</b><br>1,22        |
| Apolipoprotein L2 variant (Fragment)                      | Q59GW9 Q59GW9_HUMAN |                            |                            |             | <b>1,66</b>                | <b>1,16</b>                | 1,01                       |                            |                            |
| Apolipoprotein O precursor                                | Q9BUR5 APOO_HUMAN   | 0,00<br>0,91               | 0,00<br><b>0,83</b>        | 0,00        |                            |                            |                            | <b>0,70</b><br>1,57        | 0,93<br>1,00               |
| Apolipoprotein O-like precursor                           | Q6UXV4 APOOL_HUMAN  | 0,97                       | 1,07                       | 0,89        |                            |                            |                            |                            |                            |
| Apolipoprotein-L2                                         | Q9BQE5 APOL2_HUMAN  | 0,91<br><b>1,16</b>        | 1,19<br><b>1,12</b>        | <b>1,56</b> | <b>1,38</b>                | 1,07                       | 0,89                       | 0,80                       | 2,04                       |
| Apoptosis inhibitor 5                                     | Q9BZZ5 API5_HUMAN   |                            |                            |             | 1,21                       | 1,83                       | 1,11                       | 1,00<br>0,84               | <b>0,30</b><br><b>0,51</b> |
| Apoptosis-associated speck-like protein containing a CARD | Q9ULZ3 ASC_HUMAN    | 0,00                       | 0,00                       | 0,00        | <b>0,68</b><br>0,55        | 0,84<br><b>0,76</b>        | 0,86<br><b>0,58</b>        |                            |                            |
| Apoptosis-inducing factor 1, mitochondrial precursor      | Q95831 AIFM1_HUMAN  | <b>0,84</b><br><b>0,93</b> | 0,92<br><b>0,93</b>        | <b>0,67</b> |                            |                            |                            | 0,76<br>0,94               | 0,97<br><b>0,48</b>        |
| Apoptotic chromatin condensation inducer in the nucleus   | Q9UKV3 ACINU_HUMAN  |                            |                            |             | 1,79                       | 1,36                       | 1,32                       | <b>0,25</b><br>0,96        | <b>0,25</b><br><b>0,81</b> |
| Arachidonate 5-lipoxygenase                               | P09917 LOX5_HUMAN   | 1,09<br><b>0,81</b>        | 1,21<br>1,02               | <b>1,63</b> | 0,86                       | 0,83                       | 0,41                       | 1,26                       | <b>7,91</b>                |
| Arachidonate 5-lipoxygenase-activating protein            | P20292 AL5AP_HUMAN  | 1,13<br><b>0,76</b>        | <b>1,29</b><br>0,94        | 1,24        |                            |                            |                            |                            | <b>9,09</b>                |
| ARF GTPase-activating protein GIT2                        | Q14161 GIT2_HUMAN   | 0,99                       | 1,42                       | 2,64        |                            |                            |                            |                            |                            |
| ARF6 protein                                              | Q6FH17 Q6FH17_HUMAN | 0,00                       | 0,00                       | 0,00        | 0,00                       | 0,00                       | 0,00                       |                            |                            |
| Arginine and glutamate-rich protein 1                     | Q9NWB6 ARGL1_HUMAN  |                            |                            |             |                            |                            |                            | 1,12<br><b>1,23</b>        | <b>0,38</b><br><b>0,71</b> |
| Arginine/serine-rich coiled-coil protein 1                | Q96IZ7 RSRC1_HUMAN  |                            |                            |             |                            |                            |                            | 0,00<br>0,00               | 0,00<br>0,00               |
| Arginine/serine-rich coiled-coil protein 2                | Q7L4I2 RSRC2_HUMAN  |                            |                            |             |                            |                            |                            | 0,00<br>0,91               | 0,00<br>0,45               |
| Arginine/serine-rich splicing factor 6 variant (Fragment) | Q59GY3 Q59GY3_HUMAN |                            |                            |             |                            |                            |                            | <b>1,21</b>                | <b>0,47</b>                |
| Arginine/serine-rich splicing factor 7 type B             | Q564D3 Q564D3_HUMAN |                            |                            |             |                            |                            |                            | <b>0,85</b><br>1,14        | <b>0,30</b><br><b>0,67</b> |
| Arginyl-tRNA synthetase, cytoplasmic                      | P54136 SYRC_HUMAN   |                            |                            | 16,96       | <b>0,73</b><br>0,85        | 0,87<br>0,98               | <b>0,73</b><br>0,85        |                            |                            |
| ARHA protein (Fragment)                                   | Q9BVT0 Q9BVT0_HUMAN |                            |                            |             |                            |                            |                            | 1,28                       | 2,29                       |
| ARHG protein (Fragment)                                   | Q6ICQ8 Q6ICQ8_HUMAN | 1,10<br><b>1,14</b>        | 1,05<br>0,97               | 1,22        | 1,45                       | 1,04                       | 0,94                       | 1,58                       | 2,47                       |
| ARHGDI1 protein                                           | Q6IBM5 Q6IBM5_HUMAN |                            |                            |             | 0,94<br>0,93               | 1,02<br>1,12               | 1,01<br>1,07               |                            |                            |
| ARHGEF1 protein                                           | Q6NX52 Q6NX52_HUMAN |                            |                            |             | 0,77                       | 0,73                       | <b>0,47</b>                |                            |                            |
| Armado repeat-containing protein 1                        | Q9NVT9 ARMC1_HUMAN  |                            |                            |             |                            |                            |                            |                            |                            |
| Armado repeat-containing protein 10                       | Q8N2F6 ARM10_HUMAN  | 1,04                       | 0,98                       |             |                            |                            |                            |                            |                            |
| Armado repeat-containing X-linked protein 3               | Q9UH62 ARMX3_HUMAN  | 1,50                       | <b>1,40</b>                |             |                            |                            |                            |                            |                            |
| ARP3 actin-related protein 3 homolog variant (Fragment)   | Q9Y2Q5 MAPIP_HUMAN  | 1,08<br>1,42               | 1,15<br>1,24               | 1,39        | 0,92<br>1,05               | <b>0,83</b><br>1,04        | 1,03<br>1,10               | 1,15                       | <b>1,61</b>                |
| Arrestin beta 2 isoform 1 variant (Fragment)              | Q59EM5 Q59EM5_HUMAN |                            |                            |             |                            |                            |                            |                            |                            |

|                                                                                                 |                     |                            |                            |             |                            |                            |                            |                            |                                                       |
|-------------------------------------------------------------------------------------------------|---------------------|----------------------------|----------------------------|-------------|----------------------------|----------------------------|----------------------------|----------------------------|-------------------------------------------------------|
|                                                                                                 |                     | 1,01                       | 0,86                       |             |                            |                            |                            |                            |                                                       |
| Arsenite-resistance protein 2                                                                   | Q9BXP5 ARS2_HUMAN   |                            |                            |             |                            |                            |                            | 1,04                       | <b>0,39</b> <b>0,33</b>                               |
| Arsenate resistance protein ARS2                                                                | A4D2E6 A4D2E6_HUMAN |                            |                            |             |                            |                            |                            | <b>0,78</b>                | <b>0,45</b> <b>0,35</b>                               |
| Aryl hydrocarbon receptor interacting protein                                                   | A0SZW6 A0SZW6_HUMAN |                            |                            |             | 0,76                       | 0,97                       | 0,79                       |                            |                                                       |
| Arylacetamide deacetylase-like 1                                                                | Q6PIU2 ADCL1_HUMAN  | 0,97<br><b>0,91</b>        | <b>1,10</b><br><b>1,15</b> | 1,01        |                            |                            |                            |                            |                                                       |
| Arylsulfatase B precursor                                                                       | P15848 ARSB_HUMAN   | 1,20<br>1,05               | <b>1,62</b><br>0,92        | 1,14        | 1,78<br>1,61               | 0,89<br>0,83               | 1,56<br>1,14               |                            |                                                       |
| Asparaginyl-tRNA synthetase variant (Fragment)                                                  | Q53GU6 Q53GU6_HUMAN |                            |                            |             | <b>0,68</b>                | 0,96                       | <b>0,71</b>                |                            |                                                       |
| Aspartate aminotransferase, mitochondrial precursor                                             | P00505 AATM_HUMAN   | 0,93<br><b>0,87</b>        | <b>0,82</b><br><b>0,87</b> | <b>0,60</b> | <b>1,59</b><br><b>1,89</b> | <b>1,38</b><br><b>1,38</b> | <b>2,14</b><br><b>2,21</b> |                            |                                                       |
| Aspartyl/asparaginyl beta-hydroxylase                                                           | Q12797 ASPH_HUMAN   | 0,98<br>1,02               | 1,02<br>1,09               | 0,95        |                            |                            |                            | 0,94<br>0,88               | 1,39<br><b>2,19</b> 1,73<br><b>3,30</b>               |
| Aspartyl-tRNA synthetase, cytoplasmic                                                           | P14868 SYDC_HUMAN   |                            |                            |             | 0,80<br>1,69               | 0,98<br>1,50               | <b>0,80</b><br>1,88        |                            |                                                       |
| Ataxin-2-like protein                                                                           | Q8WWM7 ATX2L_HUMAN  |                            |                            |             | 1,07<br>1,04               | 0,89<br>0,85               | 0,81<br>0,84               |                            |                                                       |
| ATF3 protein (Fragment)                                                                         | Q6ICQ9 Q6ICQ9_HUMAN |                            |                            |             |                            |                            |                            | 0,78<br>0,93               | 0,54<br>0,45 0,62<br>0,18                             |
| Atlastin-3                                                                                      | Q6DD88 ATLA3_HUMAN  | 1,02<br>0,98               | <b>1,31</b><br><b>1,17</b> | <b>1,44</b> | <b>2,58</b>                | <b>1,30</b>                | <b>1,66</b>                |                            |                                                       |
| ATP synthase F0 subunit 6                                                                       | A6YWX8 A6YWX8_HUMAN | 1,00<br>1,10               | 1,08<br><b>0,63</b>        | 0,71        |                            |                            |                            |                            |                                                       |
| ATP synthase gamma chain                                                                        | Q6I9V2 Q6I9V2_HUMAN |                            |                            |             |                            |                            |                            |                            |                                                       |
| ATP synthase gamma chain (Fragment)                                                             | Q8TAS0 Q8TAS0_HUMAN | <b>0,70</b>                | <b>0,85</b>                | <b>0,78</b> | <b>2,15</b><br>1,86        | 1,06<br>0,92               | 1,28<br>1,32               | 0,88                       | 2,10 3,12                                             |
| ATP synthase lipid-binding protein, mitochondrial precursor                                     | Q06055 AT5G2_HUMAN  | 1,06<br>0,00               | <b>0,91</b><br>0,88        | 0,00        |                            |                            |                            |                            |                                                       |
| ATP synthase mitochondrial F1 complex assembly factor 2, mitochondrial precursor                | Q8N5M1 ATPF2_HUMAN  | 0,88<br>0,00               | 0,88<br>0,00               | 0,00        |                            |                            |                            |                            |                                                       |
| ATP synthase protein 8                                                                          | A0S8D6 A0S8D6_HUMAN | 0,00<br>0,90               | 0,00<br>1,06               | 0,00        |                            |                            |                            |                            |                                                       |
| ATP synthase subunit a                                                                          | Q4GDK0 Q4GDK0_HUMAN |                            |                            |             |                            |                            |                            |                            |                                                       |
| ATP synthase subunit alpha, mitochondrial precursor                                             | P25705 ATPA_HUMAN   | 1,04<br>1,00               | 0,92<br>0,97               |             |                            |                            |                            |                            |                                                       |
| ATP synthase subunit beta, mitochondrial precursor                                              | P06576 ATPB_HUMAN   | 1,01<br>0,98               | 1,02<br>0,95               | <b>0,84</b> | <b>2,45</b><br><b>1,91</b> | <b>1,37</b><br><b>1,12</b> | <b>1,75</b><br><b>1,55</b> | 1,11<br>0,86               | <b>2,53</b><br><b>2,08</b> 7,44<br><b>4,21</b>        |
| ATP synthase subunit d, mitochondrial                                                           | P06576 ATPB_HUMAN   | 1,01<br>0,98               | 1,02<br>0,95               | <b>0,84</b> | 2,61<br><b>1,91</b>        | 1,34<br><b>1,12</b>        | 1,58<br><b>1,11</b>        | 0,97<br>0,76               | <b>1,85</b><br><b>3,41</b> 7,94<br><b>4,75</b>        |
| ATP synthase subunit e, mitochondrial                                                           | O75947 ATP5H_HUMAN  | <b>0,96</b><br>0,93        | 0,97<br>0,94               | <b>0,79</b> | 2,11<br><b>1,37</b>        | <b>1,16</b><br>0,87        | 1,11<br>0,93               | 1,11<br>1,11               | <b>2,72</b><br><b>6,29</b>                            |
| ATP synthase subunit g, mitochondrial                                                           | P56385 ATP5I_HUMAN  | 0,93<br><b>1,06</b>        | 0,94<br><b>1,05</b>        | <b>0,79</b> | <b>1,37</b>                | 0,87                       | 0,93                       |                            |                                                       |
| ATP synthase subunit h, mitochondrial                                                           | P56385 ATP5I_HUMAN  | 1,06<br>0,96               | 1,00<br>0,97               | 0,89        | <b>2,62</b>                | <b>1,48</b>                | <b>1,33</b>                | 1,03                       | 7,53 15,51                                            |
| ATP synthase subunit i, mitochondrial                                                           | O75964 ATP5L_HUMAN  | 0,90<br>1,04               | 0,89<br>1,08               | <b>0,81</b> | <b>2,17</b>                | 0,99                       | <b>0,86</b>                | 0,75                       | 2,41 <b>4,68</b>                                      |
| ATP synthase subunit O, mitochondrial precursor                                                 | P48047 ATPO_HUMAN   | 0,96<br>0,94               | 0,94<br><b>0,87</b>        | <b>0,82</b> | <b>2,17</b><br>2,30        | 0,99<br><b>1,29</b>        | <b>0,86</b><br>1,17        | 0,87<br>1,31               | <b>2,53</b><br>2,13 <b>4,47</b>                       |
| ATP synthase subunit s, mitochondrial precursor                                                 | Q99766 ATP5S_HUMAN  | 0,96                       | 1,08                       |             |                            |                            |                            |                            |                                                       |
| ATP synthase subunit s-like protein                                                             | Q9NW81 AT5SL_HUMAN  |                            |                            |             |                            |                            |                            |                            |                                                       |
| ATP synthase, H+ transporting, mitochondrial F0 complex, subunit b isoform 1 variant (Fragment) | Q53GB3 Q53GB3_HUMAN | 1,11                       | 0,91                       |             |                            |                            |                            |                            |                                                       |
| ATP synthase, H+ transporting, mitochondrial F0 complex, subunit B1                             | Q53GB3 Q53GB3_HUMAN |                            |                            |             | <b>1,78</b><br><b>2,53</b> | 0,85<br>1,04               | 0,97<br>1,14               | 1,41                       | <b>5,46</b> <b>13,09</b>                              |
| ATP synthase, H+ transporting, mitochondrial F0 complex, subunit F6                             | Q5QN22 Q5QN22_HUMAN |                            |                            |             |                            |                            |                            | 1,57                       | <b>2,96</b> <b>9,05</b>                               |
| ATP synthase, H+ transporting, mitochondrial F0 complex, subunit B1                             | Q6NZ59 Q6NZ59_HUMAN | 0,88                       | <b>0,85</b>                | <b>0,70</b> |                            |                            |                            | 0,86                       | 3,89 <b>12,85</b>                                     |
| ATP synthase, H+ transporting, mitochondrial F0 complex, subunit F6                             | Q6NZ59 Q6NZ59_HUMAN |                            |                            |             | <b>1,87</b>                | 1,02                       | 1,31                       | 1,09                       | <b>3,53</b> <b>10,20</b>                              |
| ATP1B1 protein (Fragment)                                                                       | Q6LEU2 Q6LEU2_HUMAN | 1,73<br>1,06               | <b>1,30</b><br><b>1,17</b> | 1,32        |                            |                            |                            |                            |                                                       |
| ATP5D protein                                                                                   | Q6FG90 Q6FG90_HUMAN | 0,96<br>1,05               | 0,93<br>1,03               | <b>0,70</b> |                            |                            |                            | 0,78                       | <b>3,76</b> <b>6,39</b>                               |
| ATP5G3 protein (Fragment)                                                                       | Q6LEU9 Q6LEU9_HUMAN | 1,05<br><b>0,66</b>        | 1,03<br><b>0,84</b>        | <b>0,85</b> | 2,66<br><b>2,64</b>        | <b>1,44</b><br><b>1,26</b> | <b>1,53</b><br>1,31        | <b>1,95</b><br><b>3,24</b> | <b>3,71</b> <b>7,97</b><br><b>2,85</b> <b>6,52</b>    |
| ATP5J protein                                                                                   | Q6IB54 Q6IB54_HUMAN |                            |                            |             |                            |                            |                            |                            |                                                       |
| ATP5J2 protein                                                                                  | Q6IB54 Q6IB54_HUMAN | 1,07                       | <b>1,10</b>                |             |                            |                            |                            |                            |                                                       |
| ATP5J2 protein                                                                                  | Q6IBB3 Q6IBB3_HUMAN |                            |                            |             |                            |                            |                            |                            |                                                       |
| ATP6V1G1 protein                                                                                | Q6IB33 Q6IB33_HUMAN | 1,24<br><b>1,48</b>        | 1,27<br><b>1,99</b>        | <b>1,71</b> | 1,09<br>0,84               | <b>0,74</b><br><b>0,65</b> | 0,92<br>0,79               | <b>1,73</b><br><b>1,68</b> | <b>4,15</b><br><b>3,99</b> <b>6,58</b><br><b>6,37</b> |
| ATPase family, AAA domain containing 3A (Fragment)                                              | Q5SV24 Q5SV24_HUMAN |                            |                            |             | 0,00                       | <b>0,00</b>                | 0,00                       |                            |                                                       |
| ATPase family AAA domain-containing protein 1                                                   | Q8NBU5 ATAD1_HUMAN  | 0,75                       | 0,78                       | 0,65        |                            |                            |                            |                            |                                                       |
| ATPase family AAA domain-containing protein 3A                                                  | Q9NVI7 ATD3A_HUMAN  | 0,94<br>0,98               | 0,95<br>0,97               | <b>0,82</b> |                            |                            |                            | <b>0,80</b><br>1,08        | <b>0,56</b><br><b>0,57</b> <b>0,55</b><br><b>0,72</b> |
| ATPase family AAA domain-containing protein 3B                                                  | Q5T9A4 ATD3B_HUMAN  |                            |                            |             |                            |                            |                            |                            |                                                       |
| ATPase family AAA domain-containing protein 3B                                                  | Q5T9A4 ATD3B_HUMAN  | 0,89<br>0,87               | 1,01<br><b>0,87</b>        | <b>0,75</b> |                            |                            |                            |                            |                                                       |
| ATPase inhibitor, mitochondrial precursor                                                       | Q9UII2 ATIF1_HUMAN  | 1,21<br>1,21               | <b>1,20</b><br><b>1,20</b> |             | 1,91<br><b>1,61</b>        | 1,24<br>1,09               | <b>1,86</b><br>1,19        | 1,62                       | 2,14 3,51                                             |
| ATPase, Ca++ transporting, plasma membrane 4                                                    | B1APW6 B1APW6_HUMAN | 4,79                       | 3,58                       |             |                            |                            |                            |                            |                                                       |
| ATPase, H+ transporting, lysosomal 31kDa, V1 subunit E isoform 1                                | Q53Y06 Q53Y06_HUMAN | <b>1,31</b><br><b>0,89</b> | <b>1,82</b><br>0,98        | <b>1,68</b> | 1,12<br>1,12               | <b>0,82</b><br>0,95        | 0,93<br>1,11               | <b>1,50</b><br><b>1,49</b> | <b>3,72</b><br><b>2,92</b> <b>5,80</b><br><b>4,51</b> |
| ATP-binding cassette sub-family B member 10, mitochondrial precursor                            | Q9NRK6 ABCB10_HUMAN | 1,24<br><b>0,86</b>        | 1,09<br>0,90               | 1,09        |                            |                            |                            |                            |                                                       |
| ATP-binding cassette sub-family B member 7, mitochondrial precursor                             | O75027 ABCB7_HUMAN  | 1,15<br><b>0,86</b>        | 1,20<br>0,96               | 1,20        |                            |                            |                            |                            |                                                       |
| ATP-binding cassette sub-family B member 8, mitochondrial precursor                             | Q9NUT2 ABCB8_HUMAN  | 1,13<br>1,05               | 0,80<br>1,00               | 0,90        |                            |                            |                            |                            |                                                       |
| ATP-binding cassette sub-family D member 1                                                      | P33897 ABCD1_HUMAN  | 1,03<br><b>0,85</b>        | 0,91<br>0,89               | 0,81        |                            |                            |                            |                            |                                                       |
| ATP-binding cassette sub-family D member 3                                                      | P28288 ABCD3_HUMAN  | 1,11<br>0,98               | 1,04<br>1,12               | 0,98        |                            |                            |                            |                            |                                                       |
| ATP-binding cassette sub-family E member 1                                                      | P61221 ABCE1_HUMAN  | 0,62                       |                            | 2,81        | <b>0,83</b>                | 1,00                       | 0,97                       |                            |                                                       |
| ATP-binding cassette sub-family F member 1                                                      | Q8NE71 ABCF1_HUMAN  |                            |                            |             |                            |                            |                            | 0,00                       | 0,00 0,00                                             |
| ATP-binding cassette, sub-family C, member 3 isoform MRP3 variant (Fragment)                    | Q59H05 Q59H05_HUMAN |                            |                            |             |                            |                            |                            |                            |                                                       |
| ATP-dependent Clp protease ATP-binding subunit clpX-like, mitochondrial precursor               | O76031 CLPX_HUMAN   | 1,06<br>0,92               | 0,98<br>0,66               | 0,57        |                            |                            |                            |                            |                                                       |
| ATP-dependent DNA helicase 2 subunit 1                                                          | P12956 KU70_HUMAN   | <b>0,83</b>                | 0,83                       |             |                            |                            |                            |                            |                                                       |
| ATP-dependent DNA helicase 2 subunit 1                                                          | P12956 KU70_HUMAN   |                            |                            |             | 0,99<br>0,99               | <b>1,63</b><br><b>1,50</b> | <b>1,72</b><br>1,23        | <b>1,38</b><br><b>0,64</b> | <b>1,42</b><br><b>1,38</b> <b>1,96</b><br><b>1,48</b> |
| ATP-dependent DNA helicase 2 subunit 2                                                          | P13010 KU86_HUMAN   |                            |                            |             | <b>1,14</b>                | <b>1,53</b>                | <b>1,49</b>                | <b>1,25</b>                | <b>1,47</b> <b>2,35</b>                               |
| ATP-dependent metalloprotease YME1L1                                                            | Q96TA2 YME1L1_HUMAN | <b>0,83</b><br>1,03        | 0,85<br>1,10               | 0,94        |                            |                            |                            |                            |                                                       |
| ATP-dependent RNA helicase A                                                                    | Q08211 DHX9_HUMAN   |                            |                            |             |                            |                            |                            | <b>1,51</b><br><b>0,20</b> | <b>0,47</b><br><b>0,32</b> <b>0,68</b><br><b>0,29</b> |
| ATP-dependent RNA helicase DDX1                                                                 | Q92499 DDX1_HUMAN   |                            |                            |             |                            |                            |                            | 1,30                       | 0,24 0,60                                             |
| ATP-dependent RNA helicase DDX18                                                                | Q9NVP1 DDX18_HUMAN  |                            |                            |             | 0,00                       | 0,00                       | 0,00                       | 0,73                       | 0,41 0,43                                             |

|                                                                                              |                     |             |             |             |             |             |             |                                     |
|----------------------------------------------------------------------------------------------|---------------------|-------------|-------------|-------------|-------------|-------------|-------------|-------------------------------------|
|                                                                                              |                     |             |             |             |             | 0,38        | 0,71        | 0,48                                |
| ATP-dependent RNA helicase DDX19B                                                            | Q9UMR2 DD19B_HUMAN  |             |             |             | <b>0,77</b> | 0,90        | <b>0,55</b> |                                     |
| ATP-dependent RNA helicase SUPV3L1, mitochondrial precursor                                  | Q8IYB8 SUV3_HUMAN   | 1,06        | 1,00        |             |             |             |             |                                     |
| ATWD578                                                                                      | Q6UW11 Q6UW11_HUMAN | 0,90        | <b>0,85</b> |             |             |             |             |                                     |
| Autophagy-related protein 3                                                                  | Q9NT62 ATG3_HUMAN   |             |             |             | 0,78        | 0,82        | 0,92        |                                     |
| AVLL5809                                                                                     | Q6UWH2 Q6UWH2_HUMAN | 1,05        | 1,05        |             |             |             |             |                                     |
| B2M protein                                                                                  | Q6IAT8 Q6IAT8_HUMAN | 1,08        | 1,05        | 1,04        | <b>1,61</b> | 0,92        | <b>1,41</b> | 1,32 <b>3,48</b> <b>3,68</b>        |
| B3GAT3 protein (Fragment)                                                                    | Q5U676 Q5U676_HUMAN | 1,01        | 0,99        |             | 1,33        | 0,87        | 0,99        | 1,05 1,89 2,15                      |
| BAK1 protein                                                                                 | Q6I9T6 Q6I9T6_HUMAN | 0,95        | <b>0,82</b> |             |             |             |             |                                     |
| Band 4,1-like protein 3                                                                      | Q9Y2J2 E41L3_HUMAN  |             |             |             | 1,87        | <b>1,79</b> | 1,83        |                                     |
| Barrier-to-autointegration factor                                                            | O75531 BAF_HUMAN    | 0,89        | 0,99        |             |             |             |             | <b>0,90</b> <b>1,28</b> <b>1,26</b> |
| Basic leucine zipper and W2 domain-containing protein 1                                      | Q7L1Q6 BZW1_HUMAN   |             |             |             | <b>0,69</b> | <b>0,81</b> | <b>0,66</b> | 0,72 <b>1,61</b> <b>2,60</b>        |
| Basigin precursor                                                                            | P35613 BASI_HUMAN   |             |             |             | <b>0,57</b> | <b>0,68</b> | <b>0,45</b> | <b>2,21</b> <b>2,12</b> <b>2,89</b> |
| Bax-sigma                                                                                    | Q9NYG7 Q9NYG7_HUMAN | <b>1,72</b> | <b>3,38</b> | <b>4,40</b> | 0,90        | 0,56        | 0,34        | 0,82 1,46 <b>2,54</b>               |
| B-cell CLL/lymphoma 7 protein family member B                                                | Q9BQE9 BCL7B_HUMAN  |             |             |             |             |             |             | 0,00 0,00 0,00                      |
| B-cell CLL/lymphoma 7 protein family member C                                                | Q8WUZ0 BCL7C_HUMAN  |             |             |             |             |             |             | 0,78 <b>0,15</b> <b>0,11</b>        |
| B-cell receptor-associated protein 31                                                        | P51572 BAP31_HUMAN  | <b>0,90</b> | <b>0,82</b> | <b>0,61</b> | <b>1,78</b> | <b>1,67</b> | <b>1,78</b> | 1,10 <b>2,30</b> <b>2,27</b>        |
| B-cell receptor-associated protein 31 variant (Fragment)                                     | Q53HT6 Q53HT6_HUMAN | 1,02        | <b>1,13</b> |             | <b>1,70</b> | <b>1,41</b> | 1,47        |                                     |
| BCKDK protein                                                                                | Q96G95 Q96G95_HUMAN | 0,85        | 0,88        | 0,77        |             |             |             | <b>1,21</b> <b>1,70</b> <b>2,26</b> |
| Bcl10-interacting CARD protein                                                               | Q96LW7 BINCA_HUMAN  | 1,05        | 1,09        |             |             |             |             | 1,09 1,04 1,71                      |
| BCL2-associated athanogene 3 variant (Fragment)                                              | Q53GY1 Q53GY1_HUMAN | 0,95        | <b>0,71</b> | <b>0,49</b> |             |             |             | 0,49 1,40 1,88                      |
| Bcl-2-associated transcription factor 1                                                      | Q9NYF8 BCLF1_HUMAN  | 0,97        | 0,89        |             |             |             |             |                                     |
| Bcl-2-like 13 protein                                                                        | Q9BXX5 B2L13_HUMAN  |             |             |             | 0,43        | 0,20        |             | 0,97 <b>0,56</b> <b>0,25</b>        |
| Benzodiazepine receptor                                                                      | Q53Y59 Q53Y59_HUMAN | 1,08        | 1,01        | 1,10        |             |             |             | <b>1,18</b> <b>1,15</b> <b>0,67</b> |
| Beta actin variant (Fragment)                                                                | Q53GK6 Q53GK6_HUMAN | 1,15        | 1,17        |             |             |             |             |                                     |
| Beta-1-syntrophin                                                                            | Q13884 SNTB1_HUMAN  |             |             |             | 1,75        | 1,57        | 1,64        | 0,97 0,98 1,25                      |
| Beta-2-glycoprotein 1 precursor                                                              | P02749 APOH_HUMAN   |             |             |             | <b>0,92</b> | <b>1,10</b> | <b>0,95</b> | <b>0,72</b> <b>0,76</b> <b>0,67</b> |
| Beta-2-microglobulin                                                                         | Q540F8 Q540F8_HUMAN | <b>1,31</b> | 1,14        |             | <b>0,92</b> | <b>1,10</b> | 0,92        |                                     |
| Beta-centractin                                                                              | P42025 ACTY_HUMAN   | <b>1,19</b> | <b>1,85</b> | <b>3,15</b> | <b>1,98</b> | <b>1,89</b> | <b>3,95</b> | 1,32 <b>5,19</b> <b>6,26</b>        |
| Beta-galactosidase precursor                                                                 | P16278 BGAL_HUMAN   | <b>0,84</b> | <b>1,27</b> |             | <b>1,39</b> | <b>1,28</b> | <b>2,64</b> | 1,19 <b>6,71</b> <b>8,13</b>        |
| Beta-galactoside alpha-2,6-sialyltransferase 1                                               | P15907 SIAT1_HUMAN  | 1,11        | <b>1,27</b> |             |             |             |             |                                     |
| Beta-galactosidase (Fragment)                                                                | Q53G40 Q53G40_HUMAN |             |             |             | 0,00        | 0,00        | 0,00        |                                     |
| Beta-glucuronidase precursor                                                                 | P08236 BGLR_HUMAN   | 1,02        | 0,93        |             | <b>0,92</b> | <b>1,10</b> | <b>0,95</b> | <b>0,72</b> <b>0,76</b> <b>0,67</b> |
| Beta-hexosaminidase beta chain precursor                                                     | P07686 HEXB_HUMAN   | 1,03        | 0,92        |             |             |             |             |                                     |
| Beta-lactamase-like protein 2                                                                | Q53H82 LACB2_HUMAN  | 1,17        | <b>1,58</b> | <b>1,27</b> |             |             |             |                                     |
| BH3-interacting domain death agonist                                                         | P55957 BID_HUMAN    | 1,01        | <b>1,26</b> | <b>1,16</b> | <b>1,27</b> | 1,09        | 1,25        |                                     |
| Bifunctional aminoacyl-tRNA synthetase                                                       | P07814 SYEP_HUMAN   | 0,94        | 1,00        |             |             |             |             |                                     |
| Bifunctional coenzyme A synthase                                                             | Q13057 COASY_HUMAN  | 1,11        | <b>1,32</b> | 1,05        | <b>1,78</b> | 0,95        | <b>1,54</b> |                                     |
| Bifunctional methylenetetrahydrofolate dehydrogenase/cyclohydrolase, mitochondrial precursor | P13995 MTDC_HUMAN   | 1,00        | <b>0,88</b> |             | 1,58        | 1,00        | 1,30        |                                     |
| Bifunctional purine biosynthesis protein PURH                                                | P31939 PUR9_HUMAN   | 1,05        | 1,65        | 3,15        |             |             |             |                                     |
| Biliverdin reductase A precursor                                                             | P53004 BIEA_HUMAN   | 0,95        | <b>0,80</b> |             | 0,54        | <b>0,50</b> | 0,31        |                                     |
| Bladder cancer related CD9 variant                                                           | Q86TK9 Q86TK9_HUMAN |             |             |             | 0,00        | 0,00        | 0,00        | 1,37 <b>9999,00</b> <b>9999,00</b>  |
| Bleomycin hydrolase                                                                          | Q13867 BLMH_HUMAN   | 1,46        | <b>1,89</b> | <b>4,28</b> | <b>0,76</b> | <b>1,08</b> | <b>0,83</b> | 0,94 <b>0,70</b> <b>0,48</b>        |
| BolA-like protein 3                                                                          | Q53S33 BOLA3_HUMAN  | 0,58        | 0,94        |             | 0,89        | <b>1,19</b> | 0,99        |                                     |
| Bone marrow stromal antigen 2 precursor                                                      | Q10589 BST2_HUMAN   | 0,96        | 0,96        | 0,86        |             |             |             |                                     |
| BORIS-like protein                                                                           | A0S6W1 A0S6W1_HUMAN | 0,89        | <b>0,88</b> |             | 0,00        | 0,00        | 0,00        | <b>0,79</b> <b>0,58</b> <b>0,31</b> |
| Brain acid soluble protein 1                                                                 | P80723 BASP_HUMAN   | 0,87        | 0,80        | 0,69        | 1,29        | 1,09        | 0,93        | 0,94 <b>0,70</b> <b>0,48</b>        |
| Brain protein 44                                                                             | Q95563 BR44_HUMAN   | 1,01        | 0,95        |             | 0,97        | 1,09        | 0,93        |                                     |
| Brain protein 44-like protein                                                                | Q9Y5U8 BR44L_HUMAN  | 0,95        | 1,05        | 0,83        | <b>0,85</b> | 0,93        | <b>0,70</b> |                                     |
| Branched chain keto acid dehydrogenase E1, alpha polypeptide variant (Fragment)              | Q59EI3 Q59EI3_HUMAN | 0,00        | 0,00        | 0,00        |             |             |             | 2,57 2,28 2,07                      |
| Branched-chain-amino-acid aminotransferase, mitochondrial precursor                          | O15382 BCAT2_HUMAN  | 0,93        | 0,91        |             | 0,00        | 0,00        | 0,00        |                                     |
| Breast carcinoma-amplified sequence 2                                                        | O75934 BCAS2_HUMAN  | 0,82        | 0,81        | 0,63        | 0,86        | 1,10        | 1,31        | <b>2,03</b> 1,52 1,26               |
| Breast carcinoma amplified sequence 2 variant (Fragment)                                     | Q53HE3 Q53HE3_HUMAN | 1,09        | 0,96        |             |             |             |             | 2,26 1,89 2,29                      |
| BRI3-binding protein                                                                         | Q8WY22 BRI3B_HUMAN  | 1,03        | 1,04        | 1,08        |             |             |             |                                     |
| Bridging integrator 2                                                                        | Q9UBW5 BIN2_HUMAN   | 0,89        | 1,15        |             |             |             |             |                                     |
| BTB/POZ domain-containing protein 14A                                                        | Q96BF6 BTBDE_HUMAN  |             |             |             | <b>0,39</b> | 0,75        | 0,57        |                                     |
| BTB/POZ domain-containing protein KCTD12                                                     | Q96CX2 KCTD12_HUMAN | 0,00        | 0,00        | 0,00        | 0,73        | 0,81        | 1,16        | 0,00 0,00 0,00                      |
| BZRP protein                                                                                 | Q6ICF9 Q6ICF9_HUMAN | 0,00        | 0,00        | 0,00        | 1,02        | 1,65        | 1,18        | 0,00 0,00 0,00                      |
| C10orf54 protein (Fragment)                                                                  | Q2TA85 Q2TA85_HUMAN | 1,23        | 0,93        |             | 0,99        | <b>1,39</b> | 1,28        | 0,89 1,30 1,48                      |
| C14orf159 protein                                                                            | Q6IA66 Q6IA66_HUMAN | <b>1,21</b> | 1,03        |             |             |             |             | 1,54 1,17 1,54                      |

|                                                                            |                     |                             |                             |             |                            |                            |                            |                                                                            |
|----------------------------------------------------------------------------|---------------------|-----------------------------|-----------------------------|-------------|----------------------------|----------------------------|----------------------------|----------------------------------------------------------------------------|
| C1orf151 protein (Fragment)                                                | Q96G68 Q96G68_HUMAN | 0,84                        | 1,04                        |             |                            | 0,00                       | 0,00                       | 0,00                                                                       |
| C1orf212 protein                                                           | Q49AP7 Q49AP7_HUMAN | 0,00                        | 0,00                        | 0,00        |                            |                            |                            |                                                                            |
| C1-tetrahydrofolate synthase                                               | Q6UB35 Q6UB35_HUMAN | 0,93                        | 1,07                        | 0,96        |                            |                            |                            |                                                                            |
| C-1-tetrahydrofolate synthase, cytoplasmic                                 | P11586 C1TC_HUMAN   |                             |                             |             | 0,80<br>0,68               | 0,90<br><b>0,82</b>        | 0,83<br><b>0,71</b>        | 0,94<br>0,83<br>0,80                                                       |
| C5a anaphylatoxin chemotactic receptor                                     | P21730 C5AR_HUMAN   | 1,16<br>1,02                | 0,87<br>1,14                | 1,23        | 1,69                       | 0,81                       | 1,24                       |                                                                            |
| CAAX prenyl protease 1 homolog                                             | O75844 FACE1_HUMAN  | 0,92<br>0,98                | 1,15<br>0,96                | 1,07        |                            |                            |                            |                                                                            |
| CAG-1SL 7                                                                  | Q45RF0 Q45RF0_HUMAN |                             |                             |             | 0,00<br>0,00               | 0,00<br>0,00               | 0,00<br>0,00               |                                                                            |
| Calcium and integrin-binding protein 1                                     | Q99828 CIB1_HUMAN   | 0,91                        | <b>0,77</b>                 |             |                            |                            |                            |                                                                            |
| Calcium-binding atopy-related autoantigen 1                                | Q9BPX6 CBAA1_HUMAN  | <b>0,76</b><br><b>0,92</b>  | <b>0,73</b><br>0,94         | <b>0,63</b> |                            |                            |                            |                                                                            |
| Calcium-binding mitochondrial carrier protein Aralar2                      | Q9UJS0 CMC2_HUMAN   | 1,07<br>0,91                | 0,93<br>1,00                | <b>0,85</b> |                            |                            |                            |                                                                            |
| Calcium-binding mitochondrial carrier protein SCaMC-1                      | Q6NUK1 SCMC1_HUMAN  | 0,95<br>0,94                | 1,09<br><b>0,93</b>         | 0,98        |                            |                            |                            | 1,03<br>1,59<br><b>3,53</b>                                                |
| Calcium-binding mitochondrial carrier protein SCaMC-2                      | Q6KCM7 SCMC2_HUMAN  | 0,95<br>0,81                | 0,97<br>0,82                | 0,99        |                            |                            |                            |                                                                            |
| Calcium-binding protein 39                                                 | Q9Y376 CAB39_HUMAN  |                             |                             |             | 1,08<br>0,70               | 1,15<br><b>0,76</b>        | 0,87<br>0,72               |                                                                            |
| Calcium-binding protein p22                                                | Q99653 CHP1_HUMAN   | 0,93<br>0,93                | 1,00<br>1,01                | 1,08        | 0,99<br>0,00               | <b>0,62</b><br>0,00        | 0,73<br>0,00               | 1,89<br><b>4,85</b><br><b>6,08</b>                                         |
| Calcium-independent phospholipase A2-gamma                                 | Q9NP80 PLPL8_HUMAN  | 0,96<br>1,00                | 0,49<br>1,06                | 0,66        |                            |                            |                            |                                                                            |
| Calcium-transporting ATPase type 2C member 1                               | P98194 AT2C1_HUMAN  | 0,00<br>0,95                | 0,00<br>0,92                | 0,00        |                            |                            |                            |                                                                            |
| Calcyclin-binding protein                                                  | Q9HB71 CYBP_HUMAN   |                             |                             |             | 0,82                       | <b>0,81</b>                | 0,93                       |                                                                            |
| CALM3 protein                                                              | Q9BRL5 Q9BRL5_HUMAN | <b>1,50</b>                 | 1,14                        | 0,94        |                            |                            |                            | <b>1,30</b><br><b>2,32</b><br><b>2,73</b>                                  |
| Calmodulin                                                                 | P62158 CALM_HUMAN   |                             |                             |             | 1,05<br>0,72               | <b>1,10</b><br><b>0,73</b> | <b>1,51</b><br>1,06        | <b>1,80</b><br><b>3,92</b><br><b>4,60</b>                                  |
| Calnexin precursor                                                         | P27824 CALX_HUMAN   | <b>0,91</b><br><b>0,93</b>  | 1,05<br><b>1,24</b>         | 1,09        | <b>1,90</b><br>1,96        | 0,89<br>0,99               | 0,94<br>1,02               | 1,04<br>1,03<br><b>8,46</b><br><b>5,91</b><br><b>15,14</b><br><b>10,31</b> |
| Calpain 2, large [catalytic] subunit variant (Fragment)                    | Q59EF6 Q59EF6_HUMAN |                             |                             |             | 0,85<br>1,36               | 0,95<br>2,38               | 1,02<br>2,94               |                                                                            |
| Calpain small subunit 1                                                    | P04632 CPNS1_HUMAN  |                             |                             |             | <b>0,79</b><br><b>0,82</b> | <b>0,81</b><br>0,73        | 0,77<br>0,76               |                                                                            |
| Calpastatin                                                                | Q7Z4K0 Q7Z4K0_HUMAN |                             |                             |             | 0,00<br><b>0,66</b>        | 0,00<br>0,75               | 0,00<br>0,79               |                                                                            |
| Calpastatin isoform a variant (Fragment)                                   | Q59HE3 Q59HE3_HUMAN |                             |                             |             | <b>0,66</b>                | 0,77                       | <b>0,69</b>                | 1,27<br><b>1,89</b><br>1,49                                                |
| Calponin-2                                                                 | Q99439 CNN2_HUMAN   |                             |                             |             | <b>0,70</b>                | 0,98                       | 0,77                       |                                                                            |
| CALR protein                                                               | Q6IAT4 Q6IAT4_HUMAN | <b>0,85</b><br>0,96         | 0,96<br><b>1,20</b>         | <b>0,88</b> | <b>1,79</b><br>1,86        | <b>1,16</b><br><b>1,25</b> | <b>2,26</b><br>1,74        | 0,98<br>1,20<br><b>4,64</b><br><b>3,08</b><br><b>6,21</b><br><b>4,38</b>   |
| Calumenin precursor                                                        | O43852 CALU_HUMAN   | 1,11<br>0,96                | 0,97<br>1,04                | 0,91        | <b>2,08</b>                | <b>1,57</b>                | <b>2,46</b>                | 1,86<br>2,30<br>2,39                                                       |
| cAMP responsive element modulator                                          | Q59FC7 Q59FC7_HUMAN |                             |                             |             |                            |                            |                            | 0,00<br>0,00<br>0,00                                                       |
| cAMP-dependent protein kinase catalytic subunit alpha                      | P17612 KAPCA_HUMAN  | 0,00                        | 0,00                        | 0,00        | 0,86<br>0,00               | 1,13<br>0,00               | 0,94<br>0,00               |                                                                            |
| cAMP-dependent protein kinase type I-alpha regulatory subunit              | P10644 KAP0_HUMAN   |                             |                             |             | 0,77                       | <b>0,79</b>                | 0,74                       |                                                                            |
| cAMP-dependent protein kinase type II-alpha regulatory subunit             | P13861 KAP2_HUMAN   |                             |                             |             | 1,28                       | 0,92                       | 1,08                       |                                                                            |
| CAPN1 protein                                                              | Q6DHV4 Q6DHV4_HUMAN |                             |                             |             | 1,08<br>1,04               | 1,08<br>1,10               | 1,01<br>1,17               |                                                                            |
| Capping protein (Actin filament) muscle Z-line, alpha 2 variant (Fragment) | Q53GE2 Q53GE2_HUMAN | <b>1,48</b>                 | 1,24                        | <b>2,16</b> |                            |                            |                            |                                                                            |
| Capping protein (Actin filament) muscle Z-line, beta                       | Q32Q68 Q32Q68_HUMAN | <b>1,27</b><br><b>1,09</b>  | 1,16<br>1,08                | <b>1,88</b> | 1,02<br>1,06               | <b>1,11</b><br>1,13        | <b>1,12</b><br>1,07        | 1,15<br>1,32<br><b>1,69</b>                                                |
| Capping protein (Actin filament) muscle Z-line, beta                       | B1AK88 B1AK88_HUMAN |                             |                             |             |                            |                            |                            | 0,64<br>1,48<br>1,13                                                       |
| Caprin-1                                                                   | Q14444 CAPR1_HUMAN  |                             |                             |             | 1,57<br>1,10               | 1,38<br>0,82               | 1,64<br>0,82               | <b>0,74</b><br><b>0,39</b><br><b>0,30</b>                                  |
| Capz-interacting protein                                                   | Q6JBY9 CPZIP_HUMAN  |                             |                             |             | 0,88                       | 0,76                       | 0,78                       |                                                                            |
| Carbonic anhydrase 2                                                       | P00918 CAH2_HUMAN   |                             |                             |             | <b>0,73</b><br><b>0,85</b> | 1,04<br>1,13               | 1,01<br>1,11               |                                                                            |
| Carbonyl reductase [NADPH] 1                                               | P16152 CBR1_HUMAN   |                             |                             |             | 0,64<br>0,63               | 1,11<br>0,75               | 1,25<br>0,80               |                                                                            |
| Carbonyl reductase 4                                                       | Q8N4T8 CBR4_HUMAN   |                             |                             |             |                            |                            |                            |                                                                            |
| Carboxypeptidase D precursor                                               | O75976 CBPD_HUMAN   | 0,89                        | 0,99                        |             |                            |                            |                            |                                                                            |
| Carboxypeptidase M precursor                                               | P14384 CBPM_HUMAN   | 0,93<br>1,14<br><b>1,15</b> | 0,90<br>0,86<br>1,07        | 0,89        |                            |                            |                            |                                                                            |
| Carnitine acetyltransferase                                                | Q5T952 Q5T952_HUMAN | 1,03                        | 1,04                        | 0,67        | 0,00                       | 0,00                       | 0,00                       | <b>2,16</b><br><b>1,40</b><br>0,98<br>0,95<br>1,04<br>0,91                 |
| Carnitine O-acetyltransferase                                              | P43155 CACP_HUMAN   |                             |                             |             |                            |                            |                            |                                                                            |
| Carnitine O-palmitoyltransferase 2, mitochondrial precursor                | P23786 CPT2_HUMAN   | 1,07<br>1,01<br><b>0,90</b> | 1,01<br>0,96<br><b>0,96</b> | <b>0,86</b> |                            |                            |                            |                                                                            |
| Carnitine O-palmitoyltransferase I, liver isoform                          | P50416 CPT1A_HUMAN  | 1,06<br>0,97                | 1,07<br>1,11                | 0,97        |                            |                            |                            | 4,89<br>16,40                                                              |
| Carnitine O-palmitoyltransferase I, muscle isoform                         | Q92523 CPT1B_HUMAN  | 0,78                        | 0,87                        | 1,30        |                            |                            |                            |                                                                            |
| Carrier family 6 , member 8 variant (Fragment)                             | Q59EV6 Q59EV6_HUMAN | <b>1,24</b><br>0,95         | <b>1,43</b><br><b>0,90</b>  | 1,06        | 1,89                       | <b>1,10</b>                | <b>1,49</b>                |                                                                            |
| Casein kinase 2, beta polypeptide                                          | Q5SRQ6 Q5SRQ6_HUMAN |                             |                             |             |                            |                            |                            | <b>1,34</b><br><b>2,35</b><br><b>2,42</b>                                  |
| Caseinolytic peptidase B protein homolog                                   | Q9H078 CLPB_HUMAN   | <b>0,88</b><br><b>0,93</b>  | <b>0,61</b><br><b>0,89</b>  | <b>0,47</b> | <b>1,36</b>                | 0,97                       | 0,97                       | 0,72<br>0,29<br>0,28                                                       |
| Caspase-1 precursor                                                        | P29466 CASP1_HUMAN  |                             |                             |             | <b>0,70</b>                | <b>0,58</b>                | 0,42                       |                                                                            |
| CAST protein (Fragment)                                                    | Q05DE8 Q05DE8_HUMAN |                             |                             |             | 0,32                       | 0,62                       | 0,49                       | 0,87<br>0,90<br><b>0,50</b>                                                |
| Cat eye syndrome critical region protein 1 precursor                       | Q9NZK5 CECR1_HUMAN  | 1,07<br>0,96                | <b>1,30</b><br><b>0,89</b>  | <b>1,19</b> | <b>1,66</b><br><b>2,11</b> | 1,19<br>1,18               | <b>1,64</b><br><b>1,64</b> | 0,93<br>0,76<br>1,07<br><b>1,78</b><br><b>1,92</b>                         |
| Cat eye syndrome critical region protein 5 precursor                       | Q9BXW7 CECR5_HUMAN  | 0,93<br><b>0,86</b>         | 1,04<br><b>0,89</b>         | 0,74        |                            |                            |                            |                                                                            |
| Catalase                                                                   | P04040 CATA_HUMAN   | 0,95<br><b>0,91</b>         | 0,95<br>1,03                | <b>0,75</b> | 1,00<br><b>1,25</b>        | <b>0,87</b><br>0,99        | <b>1,11</b><br>1,03        |                                                                            |
| Catechol O-methyltransferase                                               | P21964 COMT_HUMAN   | 0,82<br>1,03                | 1,07<br><b>1,18</b>         | 0,97        | <b>1,59</b>                | 0,92                       | 0,94                       | 1,10<br>1,99<br>2,92                                                       |
| Catechol-O-methyltransferase domain-containing protein 1                   | Q86VU5 CMTD1_HUMAN  | 0,95                        | 0,76                        | 1,06        |                            |                            |                            |                                                                            |
| Cathelicidin antimicrobial peptide precursor                               | P49913 CAMP_HUMAN   | 1,04<br>0,91                | 0,82<br>0,89                | <b>1,35</b> | 1,42                       | 0,96                       | <b>2,56</b>                |                                                                            |
| Cathepsin B precursor                                                      | P07858 CATB_HUMAN   | 0,97<br><b>0,89</b>         | 1,00<br><b>0,79</b>         | <b>0,76</b> | <b>1,93</b><br><b>1,86</b> | <b>0,84</b><br>0,85        | <b>0,84</b><br><b>0,77</b> |                                                                            |
| Cathepsin D precursor                                                      | P07339 CATD_HUMAN   | <b>0,91</b>                 | <b>0,80</b>                 | <b>0,66</b> | <b>1,91</b>                | <b>0,87</b>                | <b>1,38</b>                | 1,25<br>1,38<br><b>1,50</b>                                                |

|                                                                                                                |                     |                            |                            |              |                     |                            |                            |                            |                            |                            |
|----------------------------------------------------------------------------------------------------------------|---------------------|----------------------------|----------------------------|--------------|---------------------|----------------------------|----------------------------|----------------------------|----------------------------|----------------------------|
|                                                                                                                |                     | <b>0,91</b>                | <b>0,78</b>                |              | 1,86                | <b>0,84</b>                | <b>1,26</b>                | 1,15                       | 0,87                       | 0,93                       |
| Cathepsin H precursor                                                                                          | P09668 CATH_HUMAN   | 0,95<br>1,06               | 1,22<br>0,91               | 0,95         | <b>1,64</b><br>1,78 | 1,02<br><b>1,17</b>        | <b>1,29</b><br><b>1,41</b> |                            |                            |                            |
| Cathepsin L1 precursor                                                                                         | P07711 CATL1_HUMAN  | 0,99<br>1,12               | <b>1,49</b><br>1,02        | 1,20         |                     |                            |                            |                            |                            |                            |
| Cathepsin L2 precursor                                                                                         | O60911 CATL2_HUMAN  |                            |                            |              | 1,34                | 1,05                       | 1,29                       | 1,22                       | <b>1,34</b>                | <b>1,52</b>                |
| Cathepsin Z precursor                                                                                          | Q9UBR2 CATZ_HUMAN   | 0,95<br><b>0,87</b>        | 0,77<br><b>0,81</b>        | <b>0,67</b>  | <b>1,77</b><br>1,94 | <b>0,82</b><br><b>0,83</b> | <b>0,70</b><br>0,83        |                            |                            |                            |
| Cation chloride cotransporter 6                                                                                | Q9BYI0 Q9BYI0_HUMAN | 1,09<br>1,06               | 0,91<br>0,95               | 1,07         |                     |                            |                            |                            |                            |                            |
| Cation-independent mannose-6-phosphate receptor precursor                                                      | P11717 MPRI_HUMAN   | 0,98<br><b>0,86</b>        | <b>0,70</b><br><b>0,74</b> | 0,81         | 0,00                | 0,00                       | 0,00                       | 0,00                       | 0,00                       | 0,00                       |
| CBX5 protein                                                                                                   | Q6I9T7 Q6I9T7_HUMAN |                            |                            |              |                     |                            |                            | <b>0,79</b><br>1,09        | <b>0,31</b><br>0,65        | <b>0,21</b><br><b>0,57</b> |
| CCAAT/enhancer-binding protein alpha                                                                           | P49715 CEBPA_HUMAN  |                            |                            |              |                     |                            |                            | 0,78                       | 0,43                       | 0,39                       |
| CCAAT/enhancer-binding protein beta                                                                            | P17676 CEBPB_HUMAN  |                            |                            |              |                     |                            |                            | 0,66<br>0,83               | <b>0,05</b><br><b>0,19</b> | <b>0,04</b><br><b>0,13</b> |
| CD14 antigen                                                                                                   | P08571 CD14_HUMAN   | <b>1,38</b><br><b>1,21</b> | <b>0,44</b><br><b>0,63</b> | <b>0,36</b>  | 1,75<br><b>1,87</b> | 0,49<br><b>0,53</b>        | 0,43<br><b>0,44</b>        | 1,02<br><b>1,22</b>        | <b>0,09</b><br><b>0,20</b> | <b>0,11</b><br><b>0,20</b> |
| CD166 antigen precursor                                                                                        | Q13740 CD166_HUMAN  | <b>1,25</b><br>1,12        | 0,92<br><b>1,23</b>        | 0,93         |                     |                            |                            |                            |                            |                            |
| CD2 antigen (P50), sheep red blood cell receptor variant (Fragment)                                            | Q53F96 Q53F96_HUMAN |                            |                            |              |                     |                            |                            | 0,00                       | 0,00                       | 0,00                       |
| CD2 antigen cytoplasmic tail-binding protein 2                                                                 | O95400 CD2B2_HUMAN  |                            |                            |              |                     |                            |                            | 1,11                       | 0,36                       | 0,18                       |
| CD209 protein                                                                                                  | Q2TB19 Q2TB19_HUMAN | 1,10                       | 0,86                       | 0,86         |                     |                            |                            |                            |                            |                            |
| CD276 antigen precursor                                                                                        | Q5ZPR3 CD276_HUMAN  | 1,21                       | 0,89                       | 1,04         |                     |                            |                            |                            |                            |                            |
| CD44 antigen precursor                                                                                         | P16070 CD44_HUMAN   |                            |                            |              | 1,42                | 0,99                       | <b>1,33</b>                |                            |                            |                            |
| CD44 molecule (Fragment)                                                                                       | Q9H5A7 Q9H5A7_HUMAN | <b>1,25</b><br><b>1,34</b> | <b>1,14</b><br><b>1,29</b> | <b>1,74</b>  | <b>1,63</b>         | 1,09                       | <b>1,70</b>                | <b>1,70</b><br><b>1,47</b> | <b>1,54</b><br>1,16        | <b>1,52</b><br>1,07        |
| CD48 protein                                                                                                   | Q8MGR0 Q8MGR0_HUMAN |                            |                            |              |                     |                            |                            | 0,00<br>0,00               | 0,00<br>0,00               | 0,00<br>0,00               |
| CD58 protein                                                                                                   | Q9BRW0 Q9BRW0_HUMAN | 1,28<br>1,07               | 1,10<br><b>1,10</b>        | 1,17         | 0,91                | 1,13                       | 0,84                       |                            |                            |                            |
| CD59 protein                                                                                                   | Q6FHM9 Q6FHM9_HUMAN | 1,21<br>1,05               | 0,78<br>1,16               | 0,80         |                     |                            |                            | <b>1,84</b><br><b>1,95</b> | 0,94<br><b>1,36</b>        | 1,14<br><b>1,71</b>        |
| CD74/ROS fusion protein                                                                                        | A9YLN4 A9YLN4_HUMAN |                            |                            |              | 1,70                | 0,97                       | 1,65                       |                            |                            |                            |
| CD9 antigen                                                                                                    | P21926 CD9_HUMAN    | <b>1,44</b><br><b>1,34</b> | 0,95<br><b>1,28</b>        | 1,19         | 2,07<br>1,73        | 1,21<br><b>0,77</b>        | <b>1,46</b><br>1,09        |                            |                            |                            |
| CD97 antigen precursor                                                                                         | P48960 CD97_HUMAN   | 1,13<br>0,00               | 0,99<br>0,00               |              |                     |                            |                            |                            |                            |                            |
| CD99 protein (Fragment)                                                                                        | Q6ICV7 Q6ICV7_HUMAN | <b>1,25</b><br>0,00        | 0,87<br>0,00               | 0,00         |                     | 0,83                       | 1,13                       |                            |                            |                            |
| CDC37 protein                                                                                                  | Q6FG59 Q6FG59_HUMAN |                            |                            |              | <b>0,81</b><br>0,69 | 0,98<br>0,82               | <b>0,86</b><br>0,70        |                            |                            |                            |
| CDGSH iron sulfur domain-containing protein 1                                                                  | Q9NZ45 CISD1_HUMAN  | 0,98<br>0,97               | 0,92<br>0,99               |              |                     |                            |                            |                            |                            |                            |
| CDGSH iron sulfur domain-containing protein 2                                                                  | Q8N5K1 CISD2_HUMAN  | 1,03<br><b>0,72</b>        | <b>1,14</b><br>1,04        | 1,03         |                     |                            |                            | 1,13<br>1,02               | <b>3,81</b><br>2,63        | <b>4,82</b><br>4,19        |
| CDK5 regulatory subunit-associated protein 3                                                                   | Q96JB5 CK5P3_HUMAN  |                            |                            | <b>1,47</b>  |                     |                            |                            | 1,28                       | <b>9,63</b>                | <b>8,70</b>                |
| CDKN2A-interacting protein                                                                                     | Q9NXV6 CARF_HUMAN   |                            |                            |              |                     |                            |                            | 0,72                       | 0,07                       | 0,03                       |
| cDNA FLJ11160 fis, clone PLACE1007014, weakly similar to 36 KD NUCLEOLAR PROTEIN HNP36                         | Q9NUS9 Q9NUS9_HUMAN | 0,89                       | <b>0,53</b>                |              |                     |                            |                            |                            |                            |                            |
| cDNA FLJ13286 fis, clone OVARC1001154, highly similar to Homo sapiens clone 24720 epithelin 1 and 2 mRNA       | Q9H8S1 Q9H8S1_HUMAN |                            |                            |              |                     |                            |                            | 0,00                       | 0,00                       | 0,00                       |
| cDNA FLJ14249 fis, clone OVARC1001200, weakly similar to Mus musculus HS1 binding protein 3                    | Q9H7U7 Q9H7U7_HUMAN |                            |                            |              | 0,86                | 0,70                       | 0,47                       |                            |                            |                            |
| cDNA FLJ16759 fis, clone BRACE3046450, highly similar to Interleukin-16                                        | Q6ZMQ7 Q6ZMQ7_HUMAN |                            |                            |              |                     |                            |                            | 1,04                       | <b>0,42</b>                | <b>0,35</b>                |
| cDNA FLJ25678 fis, clone TST04067, highly similar to PURINE NUCLEOSIDE PHOSPHORYLASE                           | Q8N7G1 Q8N7G1_HUMAN |                            |                            |              | 0,69<br>0,84        | 1,01<br>0,90               | 1,12<br>0,85               |                            |                            |                            |
| cDNA FLJ26554 fis, clone LNF01773, highly similar to Galactokinase                                             | Q6ZP37 Q6ZP37_HUMAN | 0,88                       | 0,99                       | 1,93         | <b>0,63</b><br>1,08 | 0,74<br>1,27               | <b>0,45</b><br>0,94        |                            |                            |                            |
| cDNA FLJ31051 fis, clone HSYRA2000605, weakly similar to MYOSIN HEAVY CHAIN, CLONE 203                         | Q96ND2 Q96ND2_HUMAN | 1,02<br>1,02               | 1,14<br>1,15               | 1,18         |                     |                            |                            | 1,07<br>1,30               | <b>2,32</b><br>1,76        | <b>4,45</b><br><b>2,86</b> |
| cDNA FLJ31747 fis, clone NT2R12007377, highly similar to RNA-BINDING PROTEIN EWS                               | Q96MX4 Q96MX4_HUMAN |                            |                            |              | 2,27<br>1,03        | 8,53<br>1,11               | 17,85<br>0,87              | 1,26<br>1,14               | 0,69<br>0,94               | 0,65<br>1,23               |
| cDNA FLJ34327 fis, clone FEBRA2009022, highly similar to TRANSLATION INITIATION FACTOR EIF-2B EPSILON          | Q541Z1 Q541Z1_HUMAN |                            |                            |              | 0,83                | 0,89                       | 0,85                       |                            |                            |                            |
| cDNA FLJ34453 fis, clone HLUNG2002429, highly similar to Homo sapiens cartilage-associated protein             | Q8NB01 Q8NB01_HUMAN | 0,54<br>1,02               | 0,99<br>1,23               | 0,65         |                     |                            |                            |                            |                            |                            |
| cDNA FLJ34850 fis, clone NT2NE2011758, highly similar to NADH-UBIQUINONE OXIDOREDUCTASE 20 kDa SUBUNIT         |                     |                            |                            |              |                     |                            |                            | 0,00                       | 0,00                       | 0,00                       |
| cDNA FLJ35689 fis, clone SPLEN2019379, highly similar to INTERFERON-REGULATED RESISTANCE GTP-BINDING           | Q8NAA8 Q8NAA8_HUMAN | 1,76                       | <b>4,84</b>                | <b>11,52</b> |                     |                            |                            |                            |                            |                            |
| cDNA FLJ36887 fis, clone BNGH42005504, highly similar to 26S PROTEASOME REGULATORY SUBUNIT S3                  | Q8N9M2 Q8N9M2_HUMAN |                            |                            |              | 0,62<br>1,02        | 0,83<br>1,25               | 0,64<br>1,02               | 0,00                       | 0,00                       | 0,00                       |
| cDNA FLJ37649 fis, clone BRHIP2000534, moderately similar to GAMMA-INTERFERON-INDUCIBLE PROTEIN IFI-16         | Q8N9E5 Q8N9E5_HUMAN |                            |                            |              |                     |                            |                            | 0,00                       | 0,00                       | 0,00                       |
| cDNA FLJ38696 fis, clone KIDNE2001931, highly similar to HETEROGENEOUS NUCLEAR RIBONUCLEOPROTEIN G             | Q8N8Y7 Q8N8Y7_HUMAN |                            |                            |              | 1,74<br>1,18        | <b>4,75</b><br>2,48        | <b>3,00</b><br>1,68        |                            |                            |                            |
| cDNA FLJ43203 fis, clone FEBRA2008468, highly similar to LYOSOMAL ACID LIPASE/CHOLESTERYL ESTER                | Q6ZUY8 Q6ZUY8_HUMAN | <b>0,64</b><br>0,79        | <b>0,53</b><br>0,83        | 0,60         |                     |                            |                            |                            |                            |                            |
| cDNA FLJ44592 fis, clone BLADE2002310, highly similar to Homo sapiens SH3-domain binding protein 1 (Fragment)  | Q6ZTJ5 Q6ZTJ5_HUMAN |                            |                            |              |                     |                            |                            | 0,79                       | 0,73                       | <b>0,85</b>                |
| cDNA FLJ45505 fis, clone BRTHA2020642, weakly similar to DRR1 protein                                          | Q6ZSI4 Q6ZSI4_HUMAN |                            |                            |              | 1,43                | 1,88                       | 1,92                       |                            |                            |                            |
| cDNA FLJ46155 fis, clone TEST14001517, moderately similar to Keratin, type I cytoskeletal 18                   | Q6ZRR8 Q6ZRR8_HUMAN | 0,70                       | 0,94                       | 3,38         |                     |                            |                            | <b>31,81</b>               |                            | <b>64,02</b>               |
| cDNA FLJ46672 fis, clone TRACH3009008, highly similar to Thioredoxin reductase                                 | Q6ZR44 Q6ZR44_HUMAN |                            |                            |              | <b>0,79</b><br>1,10 | 1,09<br>1,27               | 0,95<br>1,33               |                            |                            |                            |
| cDNA FLJ75087, highly similar to Homo sapiens sarcosine dehydrogenase (SARDH), mRNA                            | A8K596 A8K596_HUMAN | 1,06                       | 1,01                       |              |                     |                            |                            |                            |                            |                            |
| cDNA FLJ75299, highly similar to Xenopus laevis proteasome (prosome, macropain) 26S subunit, ATPase 3, mRNA    | A8K781 A8K781_HUMAN |                            |                            | 9999,00      |                     |                            |                            |                            |                            |                            |
| cDNA FLJ75460, highly similar to Homo sapiens phenylalanine-tRNA synthetase-like, beta subunit, mRNA           | A8K666 A8K666_HUMAN |                            |                            |              |                     |                            |                            | 0,92                       | 1,01                       | 1,19                       |
| cDNA FLJ75516, highly similar to Xenopus tropicalis ubiquitin C, mRNA                                          | A8K674 A8K674_HUMAN | <b>0,93</b>                | <b>1,09</b>                |              |                     |                            |                            |                            |                            |                            |
| cDNA FLJ75700, highly similar to Homo sapiens complement component 1, q subcomponent binding protein (C1QBP),  | A8K651 A8K651_HUMAN | 0,94                       | 0,65                       | 0,70         |                     |                            |                            |                            |                            |                            |
| cDNA FLJ75713, highly similar to Homo sapiens kynurenine 3-monoxygenase                                        | A8K693 A8K693_HUMAN | 1,01<br><b>1,15</b>        | 0,93<br>1,10               | 0,93         |                     |                            |                            |                            |                            |                            |
| cDNA FLJ75774, highly similar to Homo sapiens lectin, mannose-binding 2 (LMAN2), mRNA                          | A8K774 A8K774_HUMAN | 1,00                       | <b>1,11</b>                |              |                     |                            |                            |                            |                            |                            |
| cDNA FLJ75881, highly similar to Homo sapiens transferrin receptor                                             | A8K6Q8 A8K6Q8_HUMAN | 1,10<br>0,97               | 0,68<br><b>0,94</b>        | 0,62         | 1,36                | 1,09                       | 1,30                       |                            |                            |                            |
| cDNA FLJ75886, highly similar to Homo sapiens acyl-Coenzyme A oxidase 1, palmitoyl (ACOX1), transcript variant | A8K6X8 A8K6X8_HUMAN | 1,00                       | 0,90                       | <b>0,79</b>  |                     |                            |                            |                            |                            |                            |
| cDNA FLJ75945, highly similar to Homo sapiens heterogeneous nuclear ribonucleoprotein A2/B1 (HNRPA2B1),        | A8K064 A8K064_HUMAN |                            |                            |              |                     |                            |                            | 0,00                       | 0,00                       | 0,00                       |

|                                                                                                                            |                     |                            |                     |             |                            |              |                     |              |                                                    |
|----------------------------------------------------------------------------------------------------------------------------|---------------------|----------------------------|---------------------|-------------|----------------------------|--------------|---------------------|--------------|----------------------------------------------------|
| cDNA FLJ76028, highly similar to Homo sapiens regulator of G-protein signalling 10 (RGS10), transcript variant 1, mRNA     | A8K408 A8K408_HUMAN |                            |                     | 0,50        | 0,61                       | 0,56         |                     |              |                                                    |
| cDNA FLJ76053, highly similar to Homo sapiens Ras-GTPase activating protein SH3 domain-binding protein 2 (G3BP2),          | A8K6V7 A8K6V7_HUMAN |                            |                     |             |                            |              | 0,63                | 0,34         | <b>0,29</b>                                        |
| cDNA FLJ76079, highly similar to Homo sapiens lymphocyte-specific protein 1 (LSP1), mRNA                                   | A8K2L4 A8K2L4_HUMAN |                            |                     |             |                            |              | <b>1,54</b>         | <b>0,77</b>  | <b>0,51</b>                                        |
| cDNA FLJ76144, highly similar to Homo sapiens NADH dehydrogenase (ubiquinone) 1 alpha subcomplex, 10, 42kDa                | A8K413 A8K413_HUMAN | 0,95                       | 0,93                | <b>0,71</b> |                            |              |                     |              |                                                    |
| cDNA FLJ76156, highly similar to Homo sapiens aspartyl-tRNA synthetase 2 (DARS2), mRNA                                     | A8K4A8 A8K4A8_HUMAN | 0,99<br>1,03               | 0,93<br>0,91        | <b>0,86</b> |                            |              |                     |              |                                                    |
| cDNA FLJ76183                                                                                                              | A8K514 A8K514_HUMAN |                            |                     |             |                            |              |                     |              | 9999,00                                            |
| cDNA FLJ76254, highly similar to Homo sapiens gamma-glutamyl hydrolase (GGH), mRNA                                         | A8K335 A8K335_HUMAN | 1,02                       | 0,99                |             |                            |              |                     |              |                                                    |
| cDNA FLJ76270, highly similar to Homo sapiens platelet/endothelial cell adhesion molecule                                  | A8K3S7 A8K3S7_HUMAN | 1,10                       | 0,97                |             |                            |              |                     |              |                                                    |
| cDNA FLJ76298, highly similar to Homo sapiens serpin peptidase inhibitor, clade B (ovalbumin), member 1                    | A8K5L2 A8K5L2_HUMAN |                            |                     |             | 0,98                       | 0,96         | <b>0,84</b>         |              |                                                    |
| cDNA FLJ76462, highly similar to Homo sapiens heterogeneous nuclear ribonucleoprotein D                                    | A8K9J2 A8K9J2_HUMAN |                            |                     |             |                            |              | <b>1,15</b>         | <b>0,54</b>  | <b>0,56</b>                                        |
| cDNA FLJ76490, highly similar to Homo sapiens ancient ubiquitous protein 1 (AUP1), transcript variant 2, mRNA              | A8KAQ6 A8KAQ6_HUMAN | 1,01                       | 1,08                |             |                            |              |                     |              |                                                    |
| cDNA FLJ76536, highly similar to Homo sapiens TYRO protein tyrosine kinase binding protein (TYROBP), transcript variant 2, | A8K2X0 A8K2X0_HUMAN | 1,03                       | 1,05                | 0,93        |                            |              |                     |              |                                                    |
| cDNA FLJ76608, highly similar to Homo sapiens transmembrane protein 85, mRNA                                               | A8K3A9 A8K3A9_HUMAN |                            |                     |             |                            |              | 0,00                | 0,00         | 0,00                                               |
| cDNA FLJ76697                                                                                                              | A8K0M6 A8K0M6_HUMAN | 0,82                       | 0,81                |             |                            |              |                     |              |                                                    |
| cDNA FLJ76812, highly similar to Homo sapiens IQ motif containing GTPase activating protein 2 (IQGAP2), mRNA               | A8K4V1 A8K4V1_HUMAN |                            |                     |             | 1,24                       | 1,00         | 1,02                |              |                                                    |
| cDNA FLJ76817, highly similar to Homo sapiens non-POU domain containing, octamer-binding (NONO), mRNA                      | A8K525 A8K525_HUMAN | 0,63                       | 0,99                | 2,64        | 1,18                       | 2,15         | 1,42                | 0,94<br>1,01 | <b>0,23</b><br><b>0,37</b> <b>0,12</b> <b>0,31</b> |
| cDNA FLJ76820                                                                                                              | A8K544 A8K544_HUMAN | 0,99                       | 1,00                | 0,64        |                            |              |                     |              |                                                    |
| cDNA FLJ76859, highly similar to Homo sapiens splicing factor, arginine/serine-rich 4 (SFRS4), mRNA                        | A8K644 A8K644_HUMAN |                            |                     |             | 2,37                       | <b>2,36</b>  | 1,83                | <b>1,17</b>  | <b>0,69</b> <b>0,66</b>                            |
| cDNA FLJ76867, highly similar to Homo sapiens mannosidase, alpha, class 2B, member 1 (MAN2B1), mRNA                        | A8K6A7 A8K6A7_HUMAN |                            |                     |             | <b>1,68</b>                | 1,06         | <b>1,78</b>         |              |                                                    |
| cDNA FLJ77100                                                                                                              | A8K4E9 A8K4E9_HUMAN |                            |                     |             |                            |              |                     |              |                                                    |
| cDNA FLJ77138, highly similar to Homo sapiens golgi SNAP receptor complex member 1 (GOSR1), transcript variant 1,          | A8K5R6 A8K5R6_HUMAN | 1,03<br>1,21               | 1,01<br>0,82        | 0,89        |                            |              |                     |              |                                                    |
| cDNA FLJ77144, highly similar to Homo sapiens mitochondrial ribosome recycling factor (MRRF), transcript variant 1, mRNA   | A8K6D8 A8K6D8_HUMAN | 0,00                       | 0,00                | 0,00        |                            |              |                     |              |                                                    |
| cDNA FLJ77173, highly similar to Homo sapiens carboxylesterase 1                                                           | A8K844 A8K844_HUMAN |                            | <b>0,93</b>         | <b>1,15</b> |                            |              |                     |              |                                                    |
| cDNA FLJ77183                                                                                                              | A8K8K3 A8K8K3_HUMAN | 1,08                       | 0,88                |             |                            |              |                     |              |                                                    |
| cDNA FLJ77222, highly similar to Homo sapiens UDP-N-acetyl-alpha-D-galactosamine:polypeptide N-                            | A8KAJ7 A8KAJ7_HUMAN | 1,06                       | 0,88                |             |                            |              |                     |              |                                                    |
| cDNA FLJ77226, highly similar to Homo sapiens p21 activated kinase 1B (PAK1B) mRNA                                         | A8KAN3 A8KAN3_HUMAN |                            |                     |             | 0,41                       | 0,49         | 0,62                |              |                                                    |
| cDNA FLJ77282, highly similar to Homo sapiens SEH1-like (SEH1L), mRNA                                                      | A8K5B1 A8K5B1_HUMAN |                            |                     |             |                            |              |                     | 0,00         | 0,00 0,00                                          |
| cDNA FLJ77404, highly similar to Homo sapiens small nuclear ribonucleoprotein 70kDa polypeptide                            | A8KAQ5 A8KAQ5_HUMAN |                            |                     |             |                            |              |                     | 1,07         | <b>0,34</b> <b>0,30</b>                            |
| cDNA FLJ77459, highly similar to Homo sapiens interleukin enhancer binding factor 3, 90kDa, mRNA                           | A8K6F2 A8K6F2_HUMAN |                            |                     |             |                            |              |                     | 0,97         | 1,02 0,99                                          |
| cDNA FLJ77470, highly similar to Homo sapiens egf-like module containing, mucin-like, hormone receptor-like 2              | A8K6W1 A8K6W1_HUMAN | 0,00<br>0,95               | 0,00<br>1,00        | 0,00        |                            |              |                     | <b>0,43</b>  | <b>0,69</b> 0,59                                   |
| cDNA FLJ77498, highly similar to Homo sapiens nucleobindin 2 (NUCB2), mRNA                                                 | A8K642 A8K642_HUMAN | 1,18                       | 1,03                |             |                            |              |                     |              |                                                    |
| cDNA FLJ77562, highly similar to Homo sapiens STEAP family member 3 (STEAP3), transcript variant 1, mRNA                   | A8K6E3 A8K6E3_HUMAN | 0,88                       | 0,91                |             |                            |              |                     |              |                                                    |
| cDNA FLJ77574, highly similar to Homo sapiens iduronidase, alpha-L-(IDUA), mRNA                                            | A8K701 A8K701_HUMAN | 0,91                       | <b>0,86</b>         |             |                            |              |                     |              |                                                    |
| cDNA FLJ77615, highly similar to Homo sapiens nucleolar complex associated 3 homolog                                       | A8K905 A8K905_HUMAN |                            |                     |             |                            |              |                     | 0,90         | 0,59 0,55                                          |
| cDNA FLJ77650                                                                                                              | A8K111 A8K111_HUMAN | 1,23                       | 1,05                |             |                            |              |                     |              |                                                    |
| cDNA FLJ77654, highly similar to Homo sapiens guanine nucleotide binding protein (G protein), beta polypeptide 4           | A8K3F6 A8K3F6_HUMAN | 1,13                       | 1,45                |             |                            |              |                     |              |                                                    |
| cDNA FLJ77670, highly similar to Homo sapiens ribosomal protein S15a (RPS15A), mRNA                                        | A8K7H3 A8K7H3_HUMAN | 0,87                       | <b>1,26</b>         |             |                            |              |                     |              |                                                    |
| cDNA FLJ77708, highly similar to Homo sapiens coatomer protein complex, subunit gamma (COPG), mRNA                         | A8K6M8 A8K6M8_HUMAN |                            |                     |             | 0,85                       | 1,04         | 1,10                |              |                                                    |
| cDNA FLJ77725                                                                                                              | A8KAH5 A8KAH5_HUMAN |                            |                     |             | 0,72                       | 0,60         | 0,78                |              |                                                    |
| cDNA FLJ77757                                                                                                              | A8K968 A8K968_HUMAN | <b>2,09</b>                | <b>1,74</b>         |             |                            |              |                     |              |                                                    |
| cDNA FLJ77763, highly similar to Homo sapiens prolactin regulatory element binding (PREB), mRNA                            | A8K813 A8K813_HUMAN | 1,77                       | 1,52                | 1,36        |                            |              |                     |              |                                                    |
| cDNA FLJ78010, highly similar to Homo sapiens methylmalonyl Coenzyme A mutase, mRNA                                        | A8K953 A8K953_HUMAN | 0,00                       | 0,00                | 0,00        |                            |              |                     |              |                                                    |
| cDNA FLJ78048, highly similar to Homo sapiens torsin A interacting protein 1, mRNA                                         | A8K630 A8K630_HUMAN |                            |                     |             |                            |              |                     | <b>1,16</b>  | <b>0,68</b> 0,77                                   |
| cDNA FLJ78144                                                                                                              | A8K7K8 A8K7K8_HUMAN |                            |                     |             | 0,37                       | 0,55         | 0,44                |              |                                                    |
| cDNA FLJ78173, highly similar to Homo sapiens hexokinase 1 (HK1) mRNA                                                      | A8K7J7 A8K7J7_HUMAN | <b>1,16</b>                | <b>0,92</b>         |             |                            |              |                     |              |                                                    |
| cDNA FLJ78212, highly similar to Human prolidase (imido-peptidase) mRNA                                                    | A8K416 A8K416_HUMAN |                            |                     |             | 0,98                       | 0,93         | 1,02                |              |                                                    |
| cDNA FLJ78242, highly similar to Homo sapiens signal sequence receptor, alpha (translocon-associated protein               | A8K685 A8K685_HUMAN |                            |                     |             |                            |              |                     | 1,50         | <b>3,20</b> <b>4,61</b>                            |
| cDNA FLJ78246, highly similar to Homo sapiens splicing factor 3a, subunit 3, 60kDa (SF3A3), mRNA                           | A8K566 A8K566_HUMAN |                            |                     |             |                            |              |                     | 0,91         | <b>0,31</b> <b>0,25</b> <b>0,30</b>                |
| cDNA FLJ78303, highly similar to Homo sapiens CECR1 protein mRNA                                                           | A8K9H4 A8K9H4_HUMAN | 0,00                       | 0,00                | 0,00        |                            |              |                     |              |                                                    |
| cDNA FLJ78321                                                                                                              | A8K0V6 A8K0V6_HUMAN | <b>1,15</b>                | 1,00                | 0,94        |                            |              |                     |              |                                                    |
| cDNA FLJ78356, highly similar to Homo sapiens PIMIT isozyme I                                                              | A8K109 A8K109_HUMAN | 0,00                       | 0,00                | 0,00        | 0,98<br><b>0,79</b>        | 1,08<br>0,88 | 1,03<br><b>0,82</b> |              |                                                    |
| cDNA FLJ78366, highly similar to Homo sapiens leucine-rich PPR-motif containing (LRPPRC), mRNA                             | A8K1V1 A8K1V1_HUMAN | <b>0,93</b><br><b>0,94</b> | <b>0,93</b><br>0,97 | <b>0,74</b> |                            |              |                     | 0,00         | 0,00 0,00                                          |
| cDNA FLJ78417, highly similar to Homo sapiens low density lipoprotein receptor-related protein associated protein 1        | A8K8F6 A8K8F6_HUMAN |                            |                     |             | 1,36                       | 0,89         | 1,35                |              |                                                    |
| cDNA FLJ78433, highly similar to Homo sapiens chaperonin containing TCP1, subunit 5                                        | A8K2X8 A8K2X8_HUMAN |                            |                     |             | <b>0,70</b><br><b>0,73</b> | 0,99<br>0,92 | 1,09<br>0,99        | 8,60         | 18,84                                              |
| cDNA FLJ78475, highly similar to Homo sapiens glycerol-3-phosphate dehydrogenase 2                                         | A8K1Z2 A8K1Z2_HUMAN | <b>0,89</b>                | <b>0,89</b>         | <b>0,76</b> |                            |              |                     |              |                                                    |
| cDNA FLJ78481, highly similar to Homo sapiens adaptor-related protein complex 2, beta 1 subunit, mRNA                      | A8K916 A8K916_HUMAN | 1,07<br>1,14               | <b>0,69</b><br>1,06 | <b>0,73</b> |                            |              |                     |              |                                                    |
| cDNA FLJ78516                                                                                                              | A8K2W3 A8K2W3_HUMAN |                            |                     |             | 0,00                       | 0,00         | 0,00                |              |                                                    |
| cDNA FLJ78520, highly similar to Homo sapiens histone 1, H2bn (HIST1H2BN), mRNA                                            | A8K9J7 A8K9J7_HUMAN |                            |                     |             |                            |              |                     | 0,96<br>1,15 | 0,69<br>0,89 0,71<br>1,04                          |

|                                                                                                                        |                     |             |             |             |             |             |             |                                     |
|------------------------------------------------------------------------------------------------------------------------|---------------------|-------------|-------------|-------------|-------------|-------------|-------------|-------------------------------------|
| cDNA FLJ78528, highly similar to Homo sapiens vacuolar protein sorting 4B                                              | A8K4G7 A8K4G7_HUMAN |             |             |             | <b>0,56</b> | <b>0,59</b> | <b>0,36</b> |                                     |
| cDNA FLJ78533, highly similar to Homo sapiens dynamin 2 (DNM2), transcript variant 4, mRNA                             | A8K1B6 A8K1B6_HUMAN |             |             |             | 1,03        | <b>1,17</b> | 0,93        |                                     |
| cDNA FLJ78591, highly similar to Homo sapiens ribosomal protein S3A (RPS3A), mRNA                                      | A8K4W0 A8K4W0_HUMAN | 1,10        | 1,58        |             |             |             |             |                                     |
| cDNA FLJ78601, highly similar to Homo sapiens glycoprotein (transmembrane) nmb (GNPMB), transcript variant 2, mRNA     | A8K7R3 A8K7R3_HUMAN | 1,07        | 0,98        | <b>0,80</b> |             |             |             | <b>1,45</b> <b>1,55</b> <b>1,72</b> |
| cDNA FLJ78614, highly similar to Homo sapiens eukaryotic translation initiation factor 4A, isoform 1 (EIF4A1), mRNA    | A8K088 A8K088_HUMAN |             |             |             |             |             |             |                                     |
| cDNA FLJ78639                                                                                                          | A8K6Q6 A8K6Q6_HUMAN | 1,02        | 1,66        |             |             |             |             |                                     |
|                                                                                                                        |                     | 0,97        | 0,87        |             |             |             |             |                                     |
| cDNA FLJ78645, highly similar to Homo sapiens DEAH (Asp-Glu-Ala-His) box polypeptide 30 (DHX30), transcript variant 2, | A8K5F1 A8K5F1_HUMAN | 0,97        | 0,88        | 0,94        |             |             |             |                                     |
| cDNA FLJ78673, highly similar to Homo sapiens NOD9 protein (NOD9), transcript variant 1, mRNA                          | A8K6Q1 A8K6Q1_HUMAN |             |             |             |             |             |             |                                     |
|                                                                                                                        |                     | <b>1,20</b> | 0,99        |             |             |             |             |                                     |
| cDNA FLJ78677, highly similar to Homo sapiens splicing factor 3b, subunit 3, 130kDa (SF3B3), mRNA                      | A8K6V3 A8K6V3_HUMAN |             |             |             |             |             |             | <b>1,44</b> 0,51 0,79               |
| cDNA FLJ78679, highly similar to Homo sapiens DEAD (Asp-Glu-Ala-Asp) box polypeptide 46 (DDX46), mRNA                  | A8K6X3 A8K6X3_HUMAN |             |             |             |             |             |             | <b>0,31</b> <b>0,44</b> <b>0,42</b> |
|                                                                                                                        |                     |             |             |             |             |             |             | 1,07 <b>0,44</b> <b>0,38</b>        |
| cDNA FLJ90197 fis, clone MAMMA1001418                                                                                  | Q8NCK4 Q8NCK4_HUMAN | 1,10        | 0,78        | 0,84        |             |             |             |                                     |
| cDNA FLJ90278 fis, clone NT2RP1000325, highly similar to Phosphate carrier protein, mitochondrialprecursor             | Q8NCF7 Q8NCF7_HUMAN | <b>0,94</b> | <b>0,91</b> | <b>0,78</b> |             |             |             | <b>1,37</b> <b>3,70</b> <b>6,22</b> |
|                                                                                                                        |                     | 0,94        | 0,95        |             | 2,50        | <b>1,51</b> | 1,37        | 0,71 <b>2,53</b> <b>2,77</b>        |
| cDNA FLJ90803 fis, clone Y79AA1000270, highly similar to Vacuolar ATP synthase subunit S1                              | Q8NBT4 Q8NBT4_HUMAN | 0,98        | 0,75        | 0,76        |             |             |             |                                     |
|                                                                                                                        |                     | <b>0,87</b> | 0,87        |             |             |             |             |                                     |
| cDNA, FLJ79483, highly similar to Homo sapiens guanylate binding protein family, member 6 (GBP6), mRNA                 | B0AZP3 B0AZP3_HUMAN |             |             |             |             |             |             | 0,50 0,13 0,16                      |
| CDNA: FLJ20897 fis, clone ADKA03573                                                                                    | Q9H7G6 Q9H7G6_HUMAN |             |             |             |             |             |             | 0,87 <b>1,70</b> <b>1,62</b>        |
|                                                                                                                        |                     |             |             |             |             |             |             | 1,21 1,54 <b>1,56</b>               |
| CDNA: FLJ22728 fis, clone HSI15617, (Fragment)                                                                         | Q9H600 Q9H600_HUMAN |             |             |             |             |             |             | 0,00 0,00 0,00                      |
| CDP-diacylglycerol--inositol 3-phosphatidytransferase isoform 1 variant (Fragment)                                     | Q53HA5 Q53HA5_HUMAN | 0,98        | 1,30        | 1,38        |             |             |             |                                     |
|                                                                                                                        |                     | <b>0,73</b> | 0,81        |             |             |             |             |                                     |
| Cell cycle control protein 50A                                                                                         | Q9NV96 CC50A_HUMAN  | 1,06        | 0,70        | 0,62        |             |             |             |                                     |
| Cell division control protein 42 homolog precursor                                                                     | Q6ICS0 Q6ICS0_HUMAN | 1,02        | 1,00        | 1,01        | 0,84        | 0,80        | 0,72        | 0,98 0,92 <b>2,01</b>               |
|                                                                                                                        |                     | <b>1,24</b> | <b>1,28</b> |             | 1,13        | 1,06        | 0,92        | <b>0,45</b> 0,76 0,95               |
| Cell division cycle 5-like protein                                                                                     | Q99459 CDC5L_HUMAN  |             |             |             |             |             |             | <b>0,73</b> <b>0,28</b> <b>0,17</b> |
|                                                                                                                        |                     |             |             |             |             |             |             | 0,97 <b>0,50</b> <b>0,43</b>        |
| Cell division cycle and apoptosis regulator protein 1                                                                  | Q8IX12 CCAR1_HUMAN  |             |             |             |             |             |             | 1,00 0,66 0,68                      |
|                                                                                                                        |                     |             |             |             |             |             |             | 0,89 0,89 0,87                      |
| Cell growth-inhibiting protein 15                                                                                      | Q08ES5 Q08ES5_HUMAN |             |             |             |             |             |             | 1,18 1,12 1,33                      |
|                                                                                                                        |                     |             |             |             | 1,12        | 0,98        | 0,65        | <b>0,46</b> <b>0,57</b> 0,89        |
| Cell growth-inhibiting protein 34                                                                                      | Q08ES8 Q08ES8_HUMAN | <b>0,84</b> | <b>1,20</b> | <b>1,89</b> |             |             |             |                                     |
|                                                                                                                        |                     | <b>1,23</b> | <b>1,26</b> |             |             |             |             |                                     |
| Cell growth-regulating nucleolar protein                                                                               | Q9NX58 LYAR_HUMAN   |             |             |             |             |             |             | <b>0,80</b> <b>0,49</b> <b>0,49</b> |
|                                                                                                                        |                     |             |             |             |             |             |             | 0,84 <b>0,61</b> <b>0,46</b>        |
| Cell proliferation-inducing protein 47                                                                                 | Q08ET0 Q08ET0_HUMAN | <b>0,84</b> | <b>0,81</b> | <b>0,77</b> |             |             |             |                                     |
|                                                                                                                        |                     | 0,92        | 0,99        |             |             |             |             |                                     |
| Cell surface glycoprotein                                                                                              | Q29971 Q29971_HUMAN |             |             |             | <b>1,86</b> | 0,86        | 1,44        |                                     |
| Cellular retinoic acid-binding protein 2                                                                               | P29373 RABP2_HUMAN  |             |             |             | 0,91        | <b>1,17</b> | 1,12        |                                     |
|                                                                                                                        |                     |             |             |             | <b>0,76</b> | 1,11        | 1,23        |                                     |
| Centrin-2                                                                                                              | P41208 CETN2_HUMAN  |             |             |             |             |             |             | 0,90 <b>0,36</b> <b>0,22</b>        |
| Centrosomal protein 170kDa                                                                                             | A6H8X9 A6H8X9_HUMAN |             |             |             |             |             |             |                                     |
|                                                                                                                        |                     |             |             |             | 0,00        | 0,00        | 0,00        |                                     |
| Centrosomal protein of 170 kDa                                                                                         | Q5SW79 CE170_HUMAN  |             |             |             | 1,40        | 0,94        | 0,93        |                                     |
| Cerebral protein 1                                                                                                     | O43159 HUCE1_HUMAN  |             |             |             |             |             |             | 0,00 0,00 0,00                      |
| Ceroid-lipofuscinosis neuronal protein 5                                                                               | O75503 CLN5_HUMAN   | 0,88        | 1,19        | 1,22        |             |             |             |                                     |
| Cervical EMMPRIN                                                                                                       | Q54A51 Q54A51_HUMAN | <b>1,39</b> | 1,00        | 1,05        | <b>1,80</b> | 1,08        | <b>1,52</b> |                                     |
|                                                                                                                        |                     | 1,02        | <b>1,08</b> |             | <b>1,43</b> | 0,90        | 1,23        |                                     |
| CES2 protein (Fragment)                                                                                                | Q6IPK9 Q6IPK9_HUMAN |             |             |             |             |             |             | 0,90 <b>0,58</b> 0,80               |
| CGG triplet repeat-binding protein 1                                                                                   | Q9UFW8 CGBP1_HUMAN  |             |             |             |             |             |             | 1,05 0,30 <b>0,27</b>               |
| Chaperone activity of bcl1 complex-like, mitochondrial precursor                                                       | Q8NI60 ADCK3_HUMAN  |             |             |             |             |             |             |                                     |
|                                                                                                                        |                     | <b>1,25</b> | 1,00        |             |             |             |             |                                     |
| Chaperonin containing TCP1, subunit 3                                                                                  | Q5SZY0 Q5SZY0_HUMAN | 0,86        | 1,08        | <b>2,10</b> | <b>0,84</b> | 0,98        | 1,07        |                                     |
|                                                                                                                        |                     |             |             |             | 0,83        | 1,09        | 1,24        |                                     |
| Chaperonin containing TCP1, subunit 6A isoform a variant (Fragment)                                                    | Q59ET3 Q59ET3_HUMAN | 1,25        | <b>1,51</b> | 3,99        |             |             |             |                                     |
|                                                                                                                        |                     |             |             |             | 0,64        | 0,89        | 0,89        |                                     |
| Charged multivesicular body protein 1a                                                                                 | Q9HD42 CHM1A_HUMAN  |             |             |             |             |             |             | <b>1,27</b> <b>2,41</b> <b>2,25</b> |
|                                                                                                                        |                     |             |             |             |             |             |             | 1,05 <b>2,00</b> <b>2,63</b>        |
| Charged multivesicular body protein 1b                                                                                 | Q7LBR1 CHM1B_HUMAN  |             |             |             |             |             |             | 1,02 1,26 0,97                      |
| Charged multivesicular body protein 2a                                                                                 | O43633 CHM2A_HUMAN  |             |             |             |             |             |             | <b>1,25</b> <b>1,71</b> <b>1,42</b> |
|                                                                                                                        |                     |             |             |             | 1,06        | 0,69        | <b>0,62</b> | 1,64 <b>1,86</b> 1,77               |
| Charged multivesicular body protein 2b                                                                                 | Q9UQN3 CHM2B_HUMAN  |             |             |             |             |             |             |                                     |
|                                                                                                                        |                     |             |             |             | 0,88        | 0,82        | 0,93        |                                     |
| Charged multivesicular body protein 4b                                                                                 | Q9H444 CHM4B_HUMAN  | 0,00        | 0,00        | 0,00        | 0,92        | <b>0,75</b> | 0,80        | <b>1,64</b> <b>3,72</b> <b>3,25</b> |
|                                                                                                                        |                     | 0,76        | 0,94        |             | 0,65        | <b>0,66</b> | 0,60        | 0,87 2,91 3,65                      |
| Charged multivesicular body protein 5                                                                                  | Q9NZZ3 CHMP5_HUMAN  |             |             |             | 0,91        | <b>0,71</b> | <b>0,67</b> | 1,37 <b>2,22</b> 1,64               |
| Chitinase domain-containing protein 1 precursor                                                                        | Q9BWS9 CHID1_HUMAN  | <b>0,82</b> | <b>0,83</b> | <b>0,74</b> |             |             |             | 0,99 <b>1,49</b> <b>1,84</b>        |
|                                                                                                                        |                     | 0,92        | 1,00        |             |             |             |             | 0,97 <b>1,46</b> <b>1,97</b>        |
| Chitinase-3-like protein 1 precursor                                                                                   | P36222 CH3L1_HUMAN  | 0,68        | <b>0,21</b> | <b>0,19</b> |             |             |             | <b>0,80</b> <b>0,35</b> <b>0,49</b> |
|                                                                                                                        |                     | 0,83        | <b>0,74</b> |             |             |             |             |                                     |
| Chitobiase, di-N-acetyl-                                                                                               | Q5VX51 Q5VX51_HUMAN | 0,88        | <b>1,46</b> | 1,11        |             |             |             |                                     |
|                                                                                                                        |                     | 1,02        | 0,90        |             |             |             |             |                                     |
| Chitobiosyldiphosphodolichol beta-mannosyltransferase                                                                  | Q9BT22 ALG1_HUMAN   | 1,11        | <b>1,36</b> | 1,24        |             |             |             |                                     |
|                                                                                                                        |                     | 1,01        | 1,05        |             |             |             |             |                                     |
| Chloride channel CLIC-like protein 1 precursor                                                                         | Q96S66 CLCC1_HUMAN  | 1,01        | 1,02        | 1,14        |             |             |             |                                     |
| Chloride channel protein 7                                                                                             | P51798 CLCN7_HUMAN  | 1,01        | 1,07        | 0,88        |             |             |             |                                     |
|                                                                                                                        |                     | <b>0,85</b> | 0,90        |             |             |             |             |                                     |
| Chloride intracellular channel 1 protein                                                                               | O00299 CLIC1_HUMAN  |             |             |             | 0,84        | <b>0,77</b> | 0,68        |                                     |
|                                                                                                                        |                     | 1,17        | 1,26        |             | 0,85        | <b>0,80</b> | <b>0,69</b> |                                     |
| Chloride intracellular channel protein 4                                                                               | Q9Y696 CLIC4_HUMAN  |             |             |             | <b>0,77</b> | 0,91        | 0,79        |                                     |
|                                                                                                                        |                     | 1,21        | 0,99        |             | 0,89        | 0,84        | <b>0,72</b> |                                     |
| Choline/ethanolaminephosphotransferase 1                                                                               | Q9Y6K0 CEPT1_HUMAN  | 0,00        | 0,00        | 0,00        |             |             |             |                                     |
|                                                                                                                        |                     | 0,87        | 1,24        |             |             |             |             |                                     |
| Chondrosarcoma-associated protein 2                                                                                    | Q9UK43 Q9UK43_HUMAN |             |             |             |             |             |             | <b>0,78</b> <b>0,30</b> <b>0,18</b> |
|                                                                                                                        |                     |             |             |             |             |             |             | 0,86 <b>0,52</b> <b>0,35</b>        |
| Chromatin modifying protein 4A                                                                                         | Q14D22 Q14D22_HUMAN |             |             |             |             |             |             |                                     |
|                                                                                                                        |                     |             |             |             | 0,42        | 0,49        | 0,45        |                                     |
| Chromobox protein homolog 3                                                                                            | Q13185 CBX3_HUMAN   |             |             |             | <b>1,45</b> | 1,59        | 1,19        | 0,81 <b>0,31</b> <b>0,20</b>        |
|                                                                                                                        |                     |             |             |             | 0,58        | 0,97        | 1,15        | 0,80 <b>0,59</b> <b>0,48</b>        |
| Chromodomain-helicase-DNA-binding protein 4                                                                            | Q14839 CHD4_HUMAN   |             |             |             |             |             |             | 1,02 0,71 0,66                      |
|                                                                                                                        |                     |             |             |             |             |             |             | <b>0,60</b> <b>0,47</b> <b>0,47</b> |
| Cisplatin resistance-associated overexpressed protein                                                                  | O95232 CROP_HUMAN   |             |             |             |             |             |             | <b>0,88</b> <b>0,32</b> <b>0,23</b> |
|                                                                                                                        |                     |             |             |             |             |             |             | 1,17 <b>0,65</b> <b>0,65</b>        |
|                                                                                                                        | Q8N0X4 CLYBL_HUMAN  | 0,81        | 0,89        | 0,79        |             |             |             |                                     |
|                                                                                                                        |                     | 1,03        | 0,94        |             |             |             |             |                                     |
| Citrate lyase subunit beta-like protein, mitochondrial precursor                                                       |                     |             |             |             |             |             |             |                                     |
| Citrate synthase, mitochondrial precursor                                                                              | O75390 CISY_HUMAN   | <b>0,83</b> | <b>0,83</b> | <b>0,61</b> | <b>1,78</b> | <b>1,57</b> | <b>2,58</b> | 1,08 <b>2,66</b> <b>3,70</b>        |

|                                                                                          |                     |                            |                            |             |                            |                            |                            |                            |                            |                            |
|------------------------------------------------------------------------------------------|---------------------|----------------------------|----------------------------|-------------|----------------------------|----------------------------|----------------------------|----------------------------|----------------------------|----------------------------|
|                                                                                          |                     | 1,04                       | 1,02                       |             | 1,79                       | 1,36                       | 1,74                       | <b>0,76</b>                | <b>2,10</b>                | <b>2,47</b>                |
| C-jun-amino-terminal kinase-interacting protein 4                                        | O60271 JIP4_HUMAN   |                            |                            |             | 1,54                       | 1,02                       | 1,88                       |                            |                            |                            |
| CKLF-like MARVEL transmembrane domain-containing protein 3                               | Q96MX0 CKLF3_HUMAN  | 1,22<br>0,90               | 0,79<br>1,01               | 1,19        |                            |                            |                            |                            |                            |                            |
| CKLF-like MARVEL transmembrane domain-containing protein 6                               | Q9NX76 CKLF6_HUMAN  | 1,62<br><b>1,26</b>        | 1,35<br>0,94               |             |                            |                            |                            |                            |                            |                            |
| Clathrin heavy chain 1                                                                   | Q00610 CLH1_HUMAN   | <b>1,22</b><br><b>1,66</b> | <b>1,56</b><br><b>1,85</b> | <b>2,45</b> | <b>1,27</b><br>1,44        | <b>1,68</b><br>1,77        | <b>1,87</b><br>1,98        | <b>1,28</b><br><b>0,43</b> | 1,10<br>1,05               | <b>2,26</b><br><b>1,32</b> |
| Clathrin light chain A                                                                   | P09496 CLCA_HUMAN   | 1,08                       | 1,53                       | 3,15        | 1,20<br><b>0,80</b>        | 1,14<br>1,08               | 1,44<br><b>1,30</b>        | 1,01<br><b>1,44</b>        | <b>1,36</b><br><b>1,68</b> | <b>1,55</b><br><b>1,93</b> |
| Clathrin, light polypeptide                                                              | Q53Y37 Q53Y37_HUMAN |                            |                            |             | 1,46<br>0,91               | <b>1,37</b><br>1,03        | <b>1,98</b><br>1,25        | 1,02<br><b>1,38</b>        | <b>1,23</b><br><b>1,81</b> | <b>1,33</b><br><b>1,91</b> |
| Cleavage and polyadenylation specificity factor subunit 5                                | O43809 CPSF5_HUMAN  |                            |                            |             | <b>1,36</b>                | 2,38                       | 2,01                       | <b>1,24</b><br><b>1,27</b> | <b>0,78</b><br>0,88        | <b>0,48</b><br><b>0,79</b> |
| Cleavage and polyadenylation specificity factor subunit 6                                | Q16630 CPSF6_HUMAN  |                            |                            |             | 0,00                       | 0,00                       | 0,00                       | 1,06<br><b>1,49</b>        | <b>0,77</b><br><b>1,95</b> | <b>0,48</b><br><b>1,61</b> |
| Cleavage and polyadenylation specificity factor subunit 7                                | Q8N684 CPSF7_HUMAN  |                            |                            |             | 0,00                       | 0,00                       | 0,00                       | 0,74<br>1,04               | <b>0,31</b><br>0,70        | <b>0,21</b><br>0,47        |
| Cleavage stimulation factor 64 kDa subunit                                               | P33240 CSTF2_HUMAN  |                            |                            |             | 0,00                       | 0,00                       | 0,00                       | 1,02<br>1,40               | <b>0,27</b><br>0,75        | <b>0,17</b><br><b>0,36</b> |
| Cleft lip and palate transmembrane protein 1                                             | O96005 CLPT1_HUMAN  | 0,98<br>0,87               | 0,94<br>1,03               | 1,05        | 0,00<br>0,00               | 0,00<br>0,00               | 0,00<br>0,00               | 0,00<br>0,00               | 0,00<br>0,00               | 0,00<br>0,00               |
| CMRF35-like molecule 1 precursor                                                         | Q8TDQ1 CLM1_HUMAN   | 0,00                       | 0,00                       |             |                            |                            |                            |                            |                            |                            |
| C-Myc-binding protein                                                                    | Q99417 MYCBP_HUMAN  |                            |                            |             |                            |                            |                            | 0,81<br>1,42               | <b>2,01</b><br>5,18        | <b>1,75</b><br>5,30        |
| Coactosin-like protein                                                                   | Q14019 COTL1_HUMAN  | 0,00<br><b>2,25</b>        | 0,00<br><b>1,94</b>        | 0,00        | 0,92<br><b>0,86</b>        | 1,03<br>0,98               | 0,98<br>1,02               | 1,15                       | <b>0,32</b>                | <b>0,26</b>                |
| Coatomer subunit beta                                                                    | P53618 COPB_HUMAN   | 1,39                       | 1,91                       | <b>4,86</b> | 0,72<br>0,63               | 0,98<br>0,96               | 0,95<br>1,17               |                            |                            |                            |
| Coatomer subunit gamma                                                                   | Q9Y678 COPG_HUMAN   |                            |                            |             | <b>0,66</b>                | <b>0,92</b>                | 0,90                       |                            |                            |                            |
| Cob(II)yrinic acid a,c-diamide adenosyltransferase, mitochondrial precursor              | Q96EY8 MMAB_HUMAN   | 0,93<br>1,11               | 0,89<br>0,96               | <b>0,62</b> | 8,19<br>2,05               | 3,93<br>1,42               | 6,13<br>1,98               | 1,88                       | <b>2,80</b>                | <b>3,76</b>                |
| Co-chaperone protein HscB, mitochondrial precursor                                       | Q8IWL3 HSC20_HUMAN  | 1,03                       | 0,95                       |             |                            |                            |                            |                            |                            |                            |
| Coenzyme Q3 homolog, methyltransferase                                                   | Q5T061 Q5T061_HUMAN | 0,00                       |                            |             |                            |                            |                            |                            |                            |                            |
| Coenzyme Q7 homolog, ubiquinone                                                          | Q9BTT7 Q9BTT7_HUMAN | 0,92<br><b>0,80</b>        |                            |             |                            |                            |                            |                            |                            |                            |
| Cofilin-1                                                                                | P23528 COF1_HUMAN   | <b>1,88</b><br><b>2,11</b> | <b>1,63</b><br><b>1,64</b> | <b>2,18</b> | <b>0,85</b><br>0,68        | 1,02<br>0,82               | 0,99<br>0,75               | 0,94<br><b>1,45</b>        | <b>0,66</b><br><b>0,87</b> | 0,90<br><b>0,78</b>        |
| Cohesin subunit SA-1                                                                     | Q8WVM7 STAG1_HUMAN  |                            |                            |             |                            |                            |                            | 0,81                       | 1,49                       | 1,38                       |
| Coiled-coil domain containing 6                                                          | Q6GSG7 Q6GSG7_HUMAN |                            |                            |             | 0,94                       | 0,78                       | 0,72                       |                            |                            |                            |
| Coiled-coil domain-containing protein 109A                                               | Q8NE86 C109A_HUMAN  | 0,89<br>0,92               | 0,93<br>0,98               | 0,80        |                            |                            |                            |                            |                            |                            |
| Coiled-coil domain-containing protein 109B                                               | Q9NWR8 C109B_HUMAN  | 1,03                       | 0,83                       |             |                            |                            |                            |                            |                            |                            |
| Coiled-coil domain-containing protein 115                                                | Q96NT0 CC115_HUMAN  | 1,14                       | 1,13                       | 0,99        |                            |                            |                            |                            |                            |                            |
| Coiled-coil domain-containing protein 124                                                | Q96CT7 CC124_HUMAN  |                            |                            |             | 0,99<br><b>0,60</b>        | 0,69<br><b>0,68</b>        | 0,53<br><b>0,53</b>        | <b>1,08</b><br>1,18        | 0,94<br>1,25               | 0,55<br>0,91               |
| Coiled-coil domain-containing protein 44                                                 | Q9BSH4 CCD44_HUMAN  | 1,03<br>0,93               | 1,04<br>1,22               |             |                            |                            |                            |                            |                            |                            |
| Coiled-coil domain-containing protein 47 precursor                                       | Q96A33 CCD47_HUMAN  | <b>0,75</b>                | 0,99                       | 1,53        |                            |                            |                            | 0,83<br>1,03               | <b>2,39</b><br>2,01        | <b>3,16</b><br><b>2,48</b> |
| Coiled-coil domain-containing protein 51                                                 | Q96ER9 CCD51_HUMAN  | 0,94<br>0,98               | 0,92<br><b>0,86</b>        | <b>0,69</b> |                            |                            |                            |                            |                            |                            |
| Coiled-coil domain-containing protein 56                                                 | Q9Y2R0 CCD56_HUMAN  | 1,00<br>0,93               | <b>1,08</b><br>0,99        | 0,71        |                            |                            |                            | 0,94<br>1,83               | 1,04<br>2,53               | 1,05<br>3,92               |
| Coiled-coil domain-containing protein 58                                                 | Q4VC31 CCD58_HUMAN  | 0,00<br>0,87               | 0,00<br><b>0,87</b>        | 0,00        |                            |                            |                            |                            |                            |                            |
| Coiled-coil domain-containing protein 72                                                 | Q9Y2S6 CCD72_HUMAN  |                            |                            |             | 0,82<br><b>0,52</b>        | 0,82<br>0,79               | 0,86<br>0,79               | <b>0,75</b><br>0,86        | <b>0,44</b><br><b>0,69</b> | <b>0,32</b><br><b>0,66</b> |
| Coiled-coil domain-containing protein 86                                                 | Q9H6F5 CCD86_HUMAN  |                            |                            |             |                            |                            |                            | <b>1,23</b><br>1,27        | 0,82<br>1,22               | <b>0,64</b><br>1,46        |
| Coiled-coil domain-containing protein 90A, mitochondrial precursor                       | Q96AQ8 CC90A_HUMAN  | 1,17                       | 1,14                       |             |                            |                            |                            |                            |                            |                            |
| Coiled-coil domain-containing protein 90B, mitochondrial precursor                       | Q9GZT6 CC90B_HUMAN  | 1,15<br>0,94               | 0,86<br>0,84               | 0,76        |                            |                            |                            |                            |                            |                            |
| Coiled-coil domain-containing protein 93                                                 | Q567U6 CCD93_HUMAN  | 0,84                       | 0,89                       | 1,22        |                            |                            |                            |                            |                            |                            |
| Coiled-coil-helix-coiled-coil-helix domain-containing protein 3, mitochondrial precursor | Q9NX63 CHCH3_HUMAN  | <b>0,84</b><br>1,01        | <b>0,88</b><br><b>1,08</b> | <b>0,74</b> |                            |                            |                            | 0,99<br><b>0,78</b>        | 1,00<br>1,17               | 1,01<br><b>1,38</b>        |
| Coiled-coil-helix-coiled-coil-helix domain-containing protein 5                          | Q9BSY4 CHCH5_HUMAN  | 0,00                       | 0,00                       |             |                            |                            |                            |                            |                            |                            |
| Coiled-coil-helix-coiled-coil-helix domain-containing protein 6                          | Q9BRQ6 CHCH6_HUMAN  | 0,91                       | 1,14                       |             |                            |                            |                            |                            |                            |                            |
| Coiled-coil-helix-coiled-coil-helix domain-containing protein 8                          | Q9NYJ1 CHCH8_HUMAN  | 0,00                       | 0,00                       |             |                            |                            |                            |                            |                            |                            |
| Cold inducible RNA binding protein                                                       | Q53XX5 Q53XX5_HUMAN |                            |                            |             |                            |                            |                            | <b>1,39</b><br>1,78        | 0,50<br>0,58               | <b>0,32</b><br>0,66        |
| Collagen alpha-1(XI) chain precursor                                                     | P12107 COBA1_HUMAN  | 1,07                       | 1,07                       |             |                            |                            |                            |                            |                            |                            |
| Collagen type IV alpha-3-binding protein                                                 | Q9Y6P4 C43BP_HUMAN  |                            |                            |             | 0,95                       | 0,88                       | 0,65                       |                            |                            |                            |
| Collectin-12                                                                             | Q5KU26 COL12_HUMAN  | 0,88                       | 0,75                       |             |                            |                            |                            |                            |                            |                            |
| Complement component 1 Q subcomponent-binding protein, mitochondrial precursor           | Q07021 C1QBP_HUMAN  | 0,99                       | 1,00                       |             |                            |                            |                            | 0,00                       | 0,00                       | 0,00                       |
| Complex I intermediate-associated protein 30, mitochondrial precursor                    | Q9Y375 CIA30_HUMAN  | 1,01<br>1,02               | 0,88<br>0,99               | 0,71        |                            |                            |                            |                            |                            |                            |
| COMT protein                                                                             | Q9BWC7 Q9BWC7_HUMAN | 0,71<br>0,96               | 1,58<br>1,09               | 1,33        | <b>1,55</b>                | 0,93                       | 0,90                       |                            |                            |                            |
| COP9 signalosome complex subunit 4                                                       | Q9BT78 CSN4_HUMAN   |                            |                            |             | 0,84                       | 0,94                       | 0,77                       |                            |                            |                            |
| Copine-2                                                                                 | Q96FN4 CPNE2_HUMAN  |                            |                            |             | 0,00                       | 0,00                       | 0,00                       |                            |                            |                            |
| Copine-3                                                                                 | O75131 CPNE3_HUMAN  | 1,69<br>1,23               | 1,24<br>1,07               | 1,54        | 1,56                       | 1,30                       | 1,52                       |                            |                            |                            |
| Copper transport protein ATOX1                                                           | O00244 ATOX1_HUMAN  |                            |                            |             | 0,00                       | 0,00                       | 0,00                       |                            |                            |                            |
| Coproporphyrinogen oxidase variant (Fragment)                                            | Q53F08 Q53F08_HUMAN | <b>0,69</b><br>0,92        | <b>0,35</b><br><b>0,76</b> | <b>0,35</b> |                            |                            |                            |                            |                            |                            |
| Core histone macro-H2A,1                                                                 | O75367 H2AY_HUMAN   | 0,88<br><b>0,51</b>        | <b>0,38</b><br><b>0,64</b> | 1,02        | <b>2,01</b>                | <b>3,81</b>                | <b>6,46</b>                | <b>0,88</b><br>0,98        | <b>0,55</b><br><b>0,54</b> | <b>0,64</b><br><b>0,88</b> |
| Coronin 7                                                                                | Q17RK4 Q17RK4_HUMAN |                            |                            |             | 1,05<br>1,48               | 0,93<br>0,94               | 0,81<br>1,06               |                            |                            |                            |
| Coronin, actin binding protein, 1C variant (Fragment)                                    | Q59EA2 Q59EA2_HUMAN |                            |                            |             | <b>1,51</b><br><b>1,61</b> | <b>1,64</b><br><b>1,68</b> | <b>1,83</b><br><b>1,99</b> | 1,20                       | <b>0,60</b>                | 0,98                       |
| Coronin-1A                                                                               | P31146 COR1A_HUMAN  | 0,00<br>1,40               | 0,00<br>1,16               | 0,00        | 1,04<br>1,07               | <b>1,25</b><br>1,49        | <b>1,32</b><br><b>1,65</b> | <b>1,43</b><br><b>0,34</b> | 0,80<br><b>0,75</b>        | 1,13<br><b>0,68</b>        |
| Coronin-1B                                                                               | Q9BR76 COR1B_HUMAN  |                            |                            |             | 0,96<br>1,19               | 1,18<br><b>1,26</b>        | 1,03<br><b>1,36</b>        | <b>0,31</b>                | <b>0,42</b>                | <b>0,33</b>                |
| Coronin-1C, i3 protein                                                                   | A7MAP1 A7MAP1_HUMAN | <b>1,52</b><br>1,29        | 1,02<br>0,94               | <b>1,28</b> |                            |                            |                            | <b>0,33</b>                | <b>0,59</b>                | <b>0,43</b>                |

|                                                                            |                     |              |              |      |              |              |              |              |              |              |              |
|----------------------------------------------------------------------------|---------------------|--------------|--------------|------|--------------|--------------|--------------|--------------|--------------|--------------|--------------|
| Corticosteroid 11-beta-dehydrogenase isozyme 1                             | P28845 DHI1_HUMAN   | 0,92<br>0,84 | 1,24<br>0,96 | 1,20 | 1,24         | 1,16         | 0,96         |              |              |              |              |
| COX5B protein (Fragment)                                                   | Q6FHJ9 Q6FHJ9_HUMAN |              |              |      | 1,69         | 1,02         | 0,98         |              |              |              |              |
| COX7A2L protein                                                            | Q6FGA0 Q6FGA0_HUMAN | 0,90<br>0,90 | 0,79<br>0,90 | 0,81 |              |              |              | 1,12<br>0,00 | 0,93<br>0,00 | 1,70<br>0,00 |              |
| Crk-like protein                                                           | P46109 CRKL_HUMAN   |              |              |      |              | 0,00         | 0,00         | 0,00         |              |              |              |
| CSDA protein                                                               | Q96B76 Q96B76_HUMAN |              |              |      |              | 0,00         | 0,00         | 0,00         |              |              |              |
| CSTA protein                                                               | Q6IB90 Q6IB90_HUMAN |              |              |      | 0,91         | 0,96         | 0,78         |              |              |              |              |
| CTAGE family, member 5 isoform 1 variant (Fragment)                        | Q59FD2 Q59FD2_HUMAN | 0,95<br>1,04 | 1,19<br>1,05 | 1,21 |              |              |              |              |              |              |              |
| C-terminal binding protein 1                                               | Q7Z2Q5 Q7Z2Q5_HUMAN |              |              |      |              | 0,00         | 0,00         | 0,00         | 0,00         | 0,00         | 0,00         |
| Cathepsin G precursor                                                      | P08311 CATG_HUMAN   | 0,98         | 1,19         |      |              |              |              |              |              |              |              |
| Cathepsin S precursor                                                      | P25774 CATS_HUMAN   | 1,00<br>0,97 | 1,15<br>0,82 | 0,74 | 1,96<br>2,09 | 1,05<br>1,11 | 1,29<br>1,56 | 0,99<br>0,65 | 0,60<br>1,45 | 0,68<br>1,64 |              |
| CTTN protein                                                               | Q8N707 Q8N707_HUMAN |              |              |      |              |              |              | 0,91         | 0,23         | 0,23         |              |
| C-type lectin domain family 5 member A                                     | Q9NY25 CLCSA_HUMAN  | 1,79<br>1,33 | 2,85<br>1,08 | 3,20 |              | 0,00         | 0,00         | 0,00         |              |              |              |
| Cullin-4B                                                                  | Q13620 CUL4B_HUMAN  |              |              |      | 1,15         | 1,15         | 1,36         |              |              |              |              |
| Cullin-associated NEDD8-dissociated protein 1                              | Q86VP6 CAND1_HUMAN  |              |              |      | 0,97<br>0,91 | 1,05<br>0,89 | 1,14<br>0,99 |              |              |              |              |
| CYB5 protein                                                               | Q6IB14 Q6IB14_HUMAN | 0,87         | 1,17         | 0,86 |              |              |              |              |              |              |              |
| Cystatin B                                                                 | P04080 CYTB_HUMAN   | 1,01<br>1,10 | 1,43<br>1,25 | 1,66 | 0,92<br>0,77 | 1,01<br>0,75 | 0,94<br>1,10 | 0,95<br>2,17 | 2,00<br>1,90 | 2,05<br>1,84 |              |
| Cystatin-C precursor                                                       | P01034 CYTC_HUMAN   | 1,08         | 0,89         |      |              |              |              |              |              |              |              |
| Cysteine and glycine-rich protein 1                                        | Q5U0J2 Q5U0J2_HUMAN |              |              |      |              |              |              | 1,12         | 0,32         | 0,26         |              |
| Cysteine desulfurase, mitochondrial precursor                              | Q9Y697 NFS1_HUMAN   | 1,08         | 1,02         |      |              |              |              |              |              |              |              |
| Cysteine-rich protein 1                                                    | Q53XY7 Q53XY7_HUMAN |              |              |      | 0,87         | 1,06         | 1,01         |              |              |              |              |
| Cytidine deaminase                                                         | P32320 CDD_HUMAN    |              |              |      | 0,88         | 0,97         | 0,85         |              |              |              |              |
| Cytochrome b-245 heavy chain                                               | P04839 CY24B_HUMAN  | 1,30<br>1,04 | 1,05<br>1,14 | 1,10 | 1,98<br>2,55 | 1,29<br>1,29 | 1,40<br>1,51 | 2,21<br>0,53 | 2,06<br>1,89 | 4,37<br>2,06 |              |
| Cytochrome b-245 light chain                                               | P13498 CY24A_HUMAN  | 1,23<br>1,12 | 1,10<br>0,91 | 1,41 | 1,79<br>1,96 | 1,05<br>1,25 | 1,28<br>1,23 | 2,38<br>1,19 | 3,14<br>1,77 | 3,40<br>1,93 |              |
| Cytochrome b-5 isoform 1 variant (Fragment)                                | Q59F44 Q59F44_HUMAN | 1,06         | 1,10         |      |              |              |              |              |              |              |              |
| Cytochrome b5 type B precursor                                             | O43169 CYB5B_HUMAN  | 1,05         | 1,21         | 0,94 |              |              |              |              |              |              |              |
| Cytochrome b561 domain-containing protein 2                                | O14569 C56D2_HUMAN  | 0,91         | 1,07         |      |              |              |              |              |              |              |              |
| Cytochrome b-c1 complex subunit 1, mitochondrial precursor                 | P31930 QCR1_HUMAN   | 0,89<br>0,93 | 0,81<br>0,92 | 0,67 |              |              |              |              |              |              |              |
| Cytochrome b-c1 complex subunit 2, mitochondrial precursor                 | P22695 QCR2_HUMAN   | 0,85<br>0,96 | 0,86<br>0,98 | 0,84 |              |              |              | 0,97<br>1,34 | 0,75<br>0,67 | 1,49<br>1,24 |              |
| Cytochrome b-c1 complex subunit 6, mitochondrial precursor                 | P07919 QCR6_HUMAN   | 1,02<br>1,17 | 1,04<br>1,16 | 0,80 |              | 1,81         | 1,09         | 0,99         |              |              |              |
| Cytochrome b-c1 complex subunit 8                                          | O14949 QCR8_HUMAN   | 0,99<br>0,94 | 0,91<br>0,84 | 0,74 |              |              |              | 1,04<br>3,09 | 0,82<br>0,71 | 1,17<br>1,70 |              |
| Cytochrome b-c1 complex subunit 9                                          | Q9UDW1 QCR9_HUMAN   | 0,98<br>0,97 | 0,95<br>0,95 | 0,76 |              |              |              |              |              |              |              |
| Cytochrome b-c1 complex subunit Rieske, mitochondrial precursor            | P47985 UCR1_HUMAN   | 1,02<br>0,97 | 1,06<br>0,96 | 0,88 |              |              |              | 1,14         | 0,88         | 1,34         |              |
| Cytochrome c                                                               | P99999 CYC_HUMAN    | 0,74<br>0,79 | 0,68<br>0,88 | 0,30 | 1,98<br>2,23 | 2,45<br>2,43 | 2,46<br>2,44 | 1,06<br>1,65 | 0,54<br>0,85 | 0,41<br>0,68 |              |
| Cytochrome c oxidase assembly protein COX15 homolog                        | Q7KZN9 COX15_HUMAN  | 0,97<br>0,95 | 0,98<br>0,87 | 0,86 |              |              |              |              |              |              |              |
| Cytochrome c oxidase assembly protein COX19                                | Q49B96 COX19_HUMAN  | 1,34         | 0,82         |      |              |              |              |              |              |              |              |
| Cytochrome c oxidase copper chaperone                                      | Q14061 COX17_HUMAN  | 1,04         | 0,90         |      |              |              |              |              |              |              |              |
| Cytochrome c oxidase polypeptide 8A, mitochondrial                         | P10176 COX82_HUMAN  | 0,78         | 0,95         |      |              |              |              | 1,12<br>3,31 | 1,11<br>1,62 | 1,47<br>2,14 |              |
| Cytochrome c oxidase polypeptide VIa-liver, mitochondrial precursor        | P12074 CX6A1_HUMAN  | 0,00         | 0,00         |      |              |              |              |              |              |              |              |
| Cytochrome c oxidase polypeptide VIc precursor                             | P09669 COX6C_HUMAN  | 1,01<br>1,08 | 0,92<br>1,07 | 0,79 |              |              |              | 1,26<br>2,32 | 1,03<br>0,97 | 1,38<br>1,72 |              |
| Cytochrome c oxidase polypeptide VIIa-liver/heart, mitochondrial precursor | P14406 CX7A2_HUMAN  |              |              |      |              |              |              | 2,24         | 1,15         | 1,65         |              |
| Cytochrome c oxidase subunit 2                                             | Q4GQP0 Q4GQP0_HUMAN | 1,13<br>0,98 | 1,01<br>0,99 | 0,89 |              | 1,70         | 1,00         | 0,89         | 1,21<br>2,12 | 0,97<br>0,86 | 1,62<br>1,67 |
| Cytochrome c oxidase subunit 7C, mitochondrial precursor                   | P15954 COX7C_HUMAN  | 0,92<br>1,12 | 0,94<br>1,14 | 0,74 |              |              |              | 1,42<br>2,09 | 1,00<br>1,25 | 1,55<br>2,28 |              |
| Cytochrome c oxidase subunit IV isoform 1                                  | Q6P666 Q6P666_HUMAN | 0,87<br>1,04 | 0,96<br>1,03 | 0,82 |              |              |              | 1,29<br>2,54 | 0,96<br>1,46 | 1,61<br>2,32 |              |
| Cytochrome c oxidase subunit Va                                            | Q8TB65 Q8TB65_HUMAN | 0,98<br>0,99 | 0,88<br>1,05 | 0,68 |              | 0,00<br>1,82 | 0,00<br>1,09 | 0,00<br>1,17 | 1,19<br>1,96 | 0,90<br>1,23 | 1,41<br>2,02 |
| Cytochrome c oxidase subunit Vb                                            | Q53YB7 Q53YB7_HUMAN | 0,71<br>0,96 | 0,79<br>0,99 | 0,71 |              | 1,98         | 0,98         | 0,95         | 1,25<br>2,15 | 1,01<br>1,21 | 1,63<br>2,18 |
| Cytochrome c oxidase subunit VIb isoform 1                                 | P14854 CX6B1_HUMAN  | 1,00<br>0,98 | 0,91<br>1,04 | 0,77 |              | 1,72<br>1,99 | 0,96<br>1,04 | 0,84<br>0,94 | 1,25<br>2,30 | 0,66<br>1,07 | 0,98<br>1,64 |
| Cytochrome c oxidase subunit VIIa polypeptide 2                            | Q496I0 Q496I0_HUMAN | 1,10<br>0,88 | 0,97<br>0,79 | 1,14 |              |              |              |              | 1,43         | 1,09         | 1,25         |
| Cytochrome c-type heme lyase                                               | P53701 CCHL_HUMAN   | 0,94         | 1,04         |      |              |              |              |              |              |              |              |
| Cytochrome c1, heme protein, mitochondrial precursor                       | P08574 CY1_HUMAN    | 0,90         | 0,86         | 0,87 |              |              |              |              |              |              |              |
| Cytochrome P450 20A1                                                       | Q6UW02 CP20A_HUMAN  | 1,00         | 1,08         |      |              |              |              |              |              |              |              |
| Cytochrome P450 27, mitochondrial precursor                                | Q02318 CP27A_HUMAN  | 0,87<br>0,98 | 0,65<br>0,91 | 0,47 |              | 0,00<br>3,12 | 0,00<br>0,96 | 0,00<br>0,81 | 1,45<br>0,68 | 2,67<br>2,78 | 4,04<br>3,77 |
| Cytochrome P450 2S1                                                        | Q96SQ9 CP2S1_HUMAN  | 0,94<br>0,85 | 0,95<br>0,99 | 0,95 |              |              |              |              |              |              |              |
| Cytochrome P450 51A1                                                       | Q16850 CP51A_HUMAN  | 0,81         | 0,75         | 0,74 |              |              |              |              |              |              |              |
| Cytochrome P450, family 1, subfamily B, polypeptide 1                      | Q5TZW8 Q5TZW8_HUMAN | 0,87<br>0,87 | 0,78<br>0,43 | 0,63 |              |              |              |              |              |              |              |
| Cytokine receptor-like factor 3                                            | Q8IUI8 CRLF3_HUMAN  |              |              |      |              | 0,00         | 0,00         | 0,00         |              |              |              |
| Cytoplasmic dynein 1 heavy chain 1                                         | Q14204 DYHC1_HUMAN  | 0,89         | 1,13         | 1,53 |              | 0,90         | 0,98<br>0,91 | 0,80<br>0,81 | 1,07         | 0,74         | 1,14         |
| Cytoplasmic dynein intermediate chain 2C                                   | Q7Z4X1 Q7Z4X1_HUMAN | 0,00         | 0,00         | 0,00 |              | 0,97<br>0,87 | 0,93<br>1,14 | 0,85<br>0,93 |              |              |              |
| Cytoplasmic FMR1-interacting protein 1                                     | Q7L576 CYFP1_HUMAN  | 0,86<br>1,14 | 1,05<br>1,36 | 1,38 |              | 1,13         | 1,17         | 1,16         | 0,81         | 0,98         | 0,92         |
| Cytoskeleton-associated protein 4                                          | Q07065 CKAP4_HUMAN  | 0,97<br>0,98 | 1,04<br>1,14 | 1,04 |              | 1,85<br>1,61 | 0,96<br>1,12 | 1,16<br>1,21 | 0,72<br>1,21 | 2,68<br>2,76 | 3,30<br>3,84 |
| Cytoskeleton-associated protein 5                                          | Q14008 CKAP5_HUMAN  |              |              |      |              | 0,96         | 1,02         | 1,16         | 0,93         | 1,13         | 1,11         |
| Cytosol aminopeptidase                                                     | P28838 AMPL_HUMAN   | 1,02<br>1,01 | 1,02<br>1,07 | 1,53 |              | 0,97<br>0,90 | 1,14<br>1,07 | 1,18<br>0,98 |              |              |              |

|                                                                                                         |                     |             |             |             |             |             |             |             |             |             |
|---------------------------------------------------------------------------------------------------------|---------------------|-------------|-------------|-------------|-------------|-------------|-------------|-------------|-------------|-------------|
| Cytosolic non-specific dipeptidase                                                                      | Q96KP4 CNDP2_HUMAN  |             |             |             | <b>0,81</b> | <b>0,84</b> | <b>0,85</b> |             |             |             |
| DAP protein (Fragment)                                                                                  | Q6FGC3 Q6FGC3_HUMAN |             |             |             | <b>0,90</b> | 1,05        | 0,92        |             |             |             |
| DAZ-associated protein 1                                                                                | Q96EP5 DAZP1_HUMAN  |             |             |             | 0,00        | 0,00        | 0,00        |             |             |             |
|                                                                                                         |                     |             |             |             | 0,00        | 0,00        | 0,00        | 1,34        | 1,49        | 0,61        |
| D-beta-hydroxybutyrate dehydrogenase, mitochondrial precursor                                           | Q02338 BDH_HUMAN    | 0,86        | 0,94        | <b>0,73</b> |             |             |             |             |             |             |
| DDX48 protein                                                                                           | Q6IBQ2 Q6IBQ2_HUMAN | 0,99        | 1,02        |             |             |             |             | 0,92        | 0,26        | <b>0,27</b> |
|                                                                                                         |                     |             |             |             |             |             |             | <b>0,46</b> | <b>0,27</b> | <b>0,28</b> |
| DEAD (Asp-Glu-Ala-Asp) box polypeptide 17                                                               | B1AHM0 B1AHM0_HUMAN |             |             |             |             |             |             | 0,93        | <b>0,25</b> | <b>0,21</b> |
|                                                                                                         |                     |             |             |             |             |             |             | 0,67        | <b>0,40</b> | <b>0,35</b> |
| DEAD/H (Asp-Glu-Ala-Asp/His) box polypeptide 3 variant (Fragment)                                       | Q59GX6 Q59GX6_HUMAN | 0,84        | <b>1,46</b> | 1,90        | 0,74        | 0,77        | <b>0,55</b> | 1,30        | 0,27        | 0,22        |
|                                                                                                         |                     |             |             |             | 0,89        | 0,88        | 0,82        | <b>0,65</b> | <b>0,58</b> | <b>0,45</b> |
| Death-inducer obliterator 1                                                                             | Q9BTC0 DIDO1_HUMAN  |             |             |             |             |             |             | 0,82        | 0,45        | 0,44        |
|                                                                                                         |                     |             |             |             |             |             |             | 1,21        | <b>0,64</b> | 0,67        |
| Death-inducing protein                                                                                  | Q6IC98 DEAIN_HUMAN  |             |             |             |             |             |             |             |             |             |
| Dedicator of cytokinesis protein 2                                                                      | Q92608 DOCK2_HUMAN  | 0,00        | 0,00        |             | 0,00        | 0,00        | 0,00        |             |             |             |
| Dedicator of cytokinesis protein 8                                                                      | Q8NF50 DOCK8_HUMAN  | 1,05        | 1,04        |             |             |             |             |             |             |             |
|                                                                                                         |                     | 0,91        | 0,97        | <b>1,25</b> | 1,04        | 1,43        | 1,33        |             |             |             |
| Dehydrogenase/reductase SDR family member 1                                                             | Q96LJ7 DHRS1_HUMAN  | <b>0,83</b> | 0,99        |             |             |             |             |             |             |             |
| Dehydrogenase/reductase SDR family member 4                                                             | Q9BTZ2 DHRS4_HUMAN  | <b>1,20</b> | 1,05        |             |             |             |             |             |             |             |
|                                                                                                         |                     | 0,99        | 0,89        | 0,95        |             |             |             |             |             |             |
| Dehydrogenase/reductase SDR family member 7 precursor                                                   | Q9Y394 DHRS7_HUMAN  | <b>0,90</b> | 0,90        |             |             |             |             |             |             |             |
|                                                                                                         |                     | 0,99        | <b>1,22</b> | <b>1,23</b> |             |             |             |             |             |             |
| Dehydrogenase/reductase SDR family member 7B                                                            | Q6IAN0 DRS7B_HUMAN  | <b>0,89</b> | 1,03        |             |             |             |             |             |             |             |
|                                                                                                         |                     | 0,00        | 0,00        | 0,00        |             |             |             |             |             |             |
| Dehydrogenase/reductase SDR family member 9 precursor                                                   | Q9BPW9 DHRS9_HUMAN  | 0,87        | 0,94        |             |             |             |             |             |             |             |
|                                                                                                         |                     | <b>0,63</b> | 0,90        | 1,06        |             |             |             |             |             |             |
|                                                                                                         |                     | 0,85        | 1,06        |             |             |             |             |             |             |             |
| Delta(3,5)-Delta(2,4)-dienoyl-CoA isomerase, mitochondrial precursor                                    | Q13011 ECH1_HUMAN   | <b>0,79</b> | <b>0,84</b> | <b>0,64</b> | <b>2,44</b> | <b>1,94</b> | <b>4,15</b> | <b>0,80</b> | <b>1,60</b> | <b>1,95</b> |
|                                                                                                         |                     | 0,96        | <b>0,87</b> |             | <b>2,25</b> | <b>1,57</b> | <b>2,52</b> | 0,77        | 1,39        | 1,81        |
| Density-regulated protein                                                                               | Q43583 DENR_HUMAN   |             |             |             |             |             |             | 0,90        | 0,89        | 0,70        |
| Deoxynucleotidyltransferase terminal-interacting protein 2                                              | Q5QJE6 TDIF2_HUMAN  |             |             |             |             |             |             | 0,94        | 0,80        | <b>0,45</b> |
| Deoxyribonuclease-2-alpha precursor                                                                     | O00115 DNS2A_HUMAN  | 1,04        | 1,07        | 0,71        |             |             |             |             |             |             |
|                                                                                                         |                     | 1,03        | <b>0,79</b> |             | <b>1,46</b> | 0,79        | <b>1,24</b> |             |             |             |
| Deoxyuridine 5'-triphosphate nucleotidohydrolase, mitochondrial precursor                               | P33316 DUT_HUMAN    |             |             |             |             |             |             |             |             |             |
| Derlin-1                                                                                                | Q9BUN8 DERL1_HUMAN  | 1,04        | 0,90        |             |             |             |             |             |             |             |
|                                                                                                         |                     | 1,04        | 0,96        | 1,04        |             |             |             |             |             |             |
| Desmocollin-2 precursor                                                                                 | Q02487 DSC2_HUMAN   |             |             |             |             |             |             | 1,00        | <b>0,50</b> | 0,67        |
| Desmoplakin                                                                                             | P15924 DESP_HUMAN   |             |             |             |             |             |             |             |             |             |
|                                                                                                         |                     |             |             |             | <b>1,37</b> | <b>1,50</b> | 1,50        |             |             |             |
| Destrin                                                                                                 | P60981 DEST_HUMAN   |             |             |             | 0,88        | 1,11        | 1,02        |             |             |             |
| Diablo homolog, mitochondrial precursor                                                                 | Q9NR28 DBLOH_HUMAN  | 0,88        | 0,76        | 0,57        |             |             |             |             |             |             |
|                                                                                                         |                     | <b>0,90</b> | <b>0,83</b> |             |             |             |             |             |             |             |
| Diacylglycerol O-acyltransferase 1                                                                      | O75907 DGAT1_HUMAN  | 0,00        | 0,00        | 0,00        |             |             |             |             |             |             |
| Diaphanous 1 variant (Fragment)                                                                         | Q59FH8 Q59FH8_HUMAN |             |             |             | 0,81        | 0,90        | 0,88        |             |             |             |
| Dihydroipoamide branched chain transacylase E2                                                          | Q5VVL8 Q5VVL8_HUMAN | 0,94        | 0,83        | <b>0,70</b> |             |             |             |             |             |             |
| Dihydroipoamide S-acetyltransferase                                                                     | Q86YI5 Q86YI5_HUMAN | <b>0,86</b> | <b>0,85</b> | <b>0,72</b> |             |             |             |             |             |             |
| Dihydroipoamide S-acetyltransferase (E2 component of pyruvate dehydrogenase complex) variant (Fragment) | Q53EP3 Q53EP3_HUMAN | 1,02        | 1,08        |             | 3,25        | 1,79        | 3,56        |             |             |             |
| Dihydrolipoyl dehydrogenase, mitochondrial precursor                                                    | P09622 DLDH_HUMAN   | <b>0,86</b> | <b>0,86</b> | <b>0,73</b> | <b>2,16</b> | <b>1,59</b> | <b>2,59</b> | 0,94        | <b>2,41</b> | <b>5,15</b> |
|                                                                                                         |                     | 1,01        | 0,95        |             | 1,87        | 1,39        | 2,14        | 0,97        | <b>1,89</b> | <b>4,00</b> |
| Dihydroorotate dehydrogenase, mitochondrial precursor                                                   | Q02127 PYRD_HUMAN   | 0,74        | 0,77        | 0,47        |             |             |             |             |             |             |
|                                                                                                         |                     | 0,90        | <b>0,84</b> |             |             |             |             |             |             |             |
| Dihydropteridine reductase                                                                              | P09417 DHPR_HUMAN   | 0,49        | 0,35        | 0,30        |             |             |             |             |             |             |
|                                                                                                         |                     | 1,09        | 1,07        |             |             |             |             |             |             |             |
| Dihydropyrimidinase-like 2                                                                              | Q86U75 Q86U75_HUMAN | 1,02        | 1,41        | 1,77        |             |             |             |             |             |             |
|                                                                                                         |                     | 0,88        | <b>1,23</b> |             |             |             |             | 0,89        | <b>3,08</b> | <b>4,38</b> |
| Dihydropyrimidinase-like 2 variant (Fragment)                                                           | Q59GB4 Q59GB4_HUMAN |             |             |             | <b>0,87</b> | <b>0,87</b> | <b>0,81</b> |             |             |             |
|                                                                                                         |                     |             |             |             | 0,86        | 1,08        | 0,75        |             |             |             |
| Dipeptidyl peptidase 9                                                                                  | Q86TI2 DPP9_HUMAN   |             |             |             | 0,00        | 0,00        | 0,00        |             |             |             |
| Dipeptidyl-peptidase 1 precursor                                                                        | P53634 CATC_HUMAN   | 1,16        | <b>1,68</b> | 1,03        | 0,42        | 0,77        | 0,52        |             |             |             |
|                                                                                                         |                     | <b>0,82</b> | 0,92        |             |             |             |             |             |             |             |
| Dipeptidyl-peptidase 2 precursor                                                                        | Q9UHL4 DPP2_HUMAN   | 1,19        | 1,21        |             |             |             |             |             |             |             |
| Dipeptidyl-peptidase 3                                                                                  | Q9NY33 DPP3_HUMAN   |             |             |             | <b>0,87</b> | 0,94        | 0,94        |             |             |             |
|                                                                                                         |                     |             |             |             | 0,97        | 0,92        | 0,95        |             |             |             |
| Diphosphomevalonate decarboxylase                                                                       | P53602 ERG19_HUMAN  |             |             |             | 0,97        | 1,07        | <b>0,75</b> |             |             |             |
|                                                                                                         |                     |             |             |             | 0,98        | 1,14        | 0,81        |             |             |             |
| Disabled homolog 2                                                                                      | P98082 DAB2_HUMAN   | 0,78        | 0,47        | 0,57        | 0,76        | 0,63        | 0,44        | 0,69        | <b>0,33</b> | <b>0,45</b> |
|                                                                                                         |                     | <b>1,40</b> | 0,82        |             | <b>0,47</b> | <b>0,54</b> | <b>0,45</b> |             |             |             |
| Disrupted in renal carcinoma protein 2                                                                  | Q96SL1 DIRC2_HUMAN  | 0,00        | 0,00        | 0,00        |             |             |             |             |             |             |
|                                                                                                         |                     | 0,00        | 0,97        |             |             |             |             |             |             |             |
| DNA (cytosine-5)-methyltransferase 1                                                                    | P26358 DNMT1_HUMAN  |             |             |             |             |             |             | 0,00        | 0,00        | 0,00        |
|                                                                                                         |                     |             |             |             |             |             |             | 0,89        | 0,34        | <b>0,35</b> |
| DNA damage-binding protein 1                                                                            | Q16531 DDB1_HUMAN   |             |             |             | 1,23        | 1,84        | 1,17        |             |             |             |
| DNA topoisomerase 1                                                                                     | P11387 TOP1_HUMAN   |             |             |             |             |             |             | 0,98        | <b>0,48</b> | <b>0,87</b> |
|                                                                                                         |                     |             |             |             |             |             |             | <b>0,57</b> | <b>0,61</b> | <b>0,81</b> |
| DNA topoisomerase 2 (Fragment)                                                                          | Q71UH4 Q71UH4_HUMAN |             |             |             |             |             |             | 0,80        | <b>0,53</b> | 0,54        |
|                                                                                                         |                     |             |             |             |             |             |             | <b>0,42</b> | <b>0,59</b> | <b>0,57</b> |
| DNA-dependent protein kinase catalytic subunit                                                          | P78527 PRKDC_HUMAN  |             |             |             |             |             |             | 1,75        | 0,64        | <b>0,70</b> |
|                                                                                                         |                     |             |             |             |             |             |             | <b>0,35</b> | <b>0,48</b> | <b>0,40</b> |
| DNA-directed RNA polymerase, mitochondrial precursor                                                    | O00411 RPOM_HUMAN   |             |             |             |             |             |             |             |             |             |
|                                                                                                         |                     | 0,94        | 0,92        |             |             |             |             |             |             |             |
| DNA-directed RNA polymerase I subunit RPA34                                                             | O15446 RPA34_HUMAN  |             |             |             |             |             |             | 1,06        | 0,84        | 0,60        |
| DNA-directed RNA polymerase II subunit RPB2                                                             | P30876 RPB2_HUMAN   |             |             |             |             |             |             | 0,00        | 0,00        | 0,00        |
|                                                                                                         |                     |             |             |             |             |             |             | 0,92        | <b>0,41</b> | <b>0,22</b> |
| DNA-directed RNA polymerase II subunit RPB4                                                             | O15514 RPB4_HUMAN   |             |             |             |             |             |             |             |             |             |
| DNA-directed RNA polymerases I, II, and III subunit RPABC1                                              | P19388 RPAB1_HUMAN  |             |             |             |             |             |             | 0,96        | <b>0,42</b> | <b>0,31</b> |
|                                                                                                         |                     |             |             |             |             |             |             | 0,91        | <b>0,33</b> | <b>0,45</b> |
| DNA-directed RNA polymerases I, II, and III subunit RPABC3                                              | P52434 RPAB3_HUMAN  |             |             |             |             |             |             |             |             |             |
|                                                                                                         |                     |             |             |             |             |             |             | 0,00        | 0,00        | 0,00        |
| DnaJ (Hsp40) homolog, subfamily A, member 1                                                             | Q5T7Q0 Q5T7Q0_HUMAN |             |             |             |             |             |             |             |             |             |
|                                                                                                         |                     | 1,05        | 1,12        |             |             |             |             |             |             |             |
| DnaJ domain-containing protein RME-8                                                                    | Q3L0T1 Q3L0T1_HUMAN | 0,90        | 0,98        |             |             |             |             |             |             |             |
| DnaJ homolog subfamily A member 2                                                                       | O60884 DNJA2_HUMAN  |             |             |             | 0,69        | 0,76        | <b>0,62</b> |             |             |             |
|                                                                                                         |                     |             |             |             |             |             |             |             |             |             |
| DnaJ homolog subfamily A member 3, mitochondrial precursor                                              | Q96EY1 DNJA3_HUMAN  | 1,07        | 0,87        | 0,82        |             |             |             |             |             |             |
|                                                                                                         |                     | <b>1,20</b> | 1,12        |             |             |             |             |             |             |             |
| DnaJ homolog subfamily B member 11 precursor                                                            | Q9UBS4 DJB11_HUMAN  | 1,01        | 1,11        | <b>1,27</b> |             |             |             | 1,17        | <b>2,19</b> | <b>2,31</b> |
|                                                                                                         |                     | 1,00        | <b>1,15</b> |             |             |             |             | <b>1,40</b> | <b>2,69</b> | <b>3,82</b> |
| DnaJ homolog subfamily B member 12                                                                      | Q9NXW2 DJB12_HUMAN  | 0,83        | 0,97        | 0,97        |             |             |             |             |             |             |

|                                                                                    |                     |                      |                             |             |                            |                     |                            |                      |                                                     |
|------------------------------------------------------------------------------------|---------------------|----------------------|-----------------------------|-------------|----------------------------|---------------------|----------------------------|----------------------|-----------------------------------------------------|
|                                                                                    |                     | 0,78                 | 1,28                        |             |                            |                     |                            |                      |                                                     |
| DnaJ homolog subfamily B member 4                                                  | A1A5C4 A1A5C4_HUMAN |                      |                             |             |                            |                     |                            | 0,83                 | <b>2,48</b> <b>2,21</b>                             |
| DnaJ homolog subfamily C member 10 precursor                                       | Q8IXB1 DJC10_HUMAN  | 0,87<br>0,98         | 0,88<br>1,06                | 1,01        |                            |                     |                            |                      |                                                     |
| DnaJ homolog subfamily C member 11                                                 | Q9NVH1 DJC11_HUMAN  | 1,03<br>1,04         | 0,99<br>1,06                | 0,90        |                            |                     |                            |                      |                                                     |
| DnaJ homolog subfamily C member 13                                                 | O75165 DNJCD_HUMAN  | 0,96                 | 0,99                        | 1,18        |                            |                     |                            |                      |                                                     |
| DnaJ homolog subfamily C member 3 precursor                                        | Q13217 DNJC3_HUMAN  | <b>0,91</b><br>0,98  | 1,01<br><b>1,07</b>         | 1,00        | <b>2,02</b><br>1,23        | 1,24<br>1,09        | 1,84<br>1,14               | 1,13<br>0,99         | <b>4,32</b> <b>5,55</b><br><b>3,76</b> <b>5,46</b>  |
| DnaJ homolog subfamily C member 5                                                  | Q9H3Z4 DNJC5_HUMAN  | 1,10<br>0,98         | 1,00<br>0,98                | 1,19        | <b>2,13</b>                | 1,22                | 1,61                       |                      |                                                     |
| DnaJ homolog subfamily C member 7                                                  | Q99615 DNJC7_HUMAN  |                      |                             |             | 0,75<br><b>0,50</b>        | 0,73<br>0,55        | 0,53<br><b>0,40</b>        |                      |                                                     |
| DnaJ homolog subfamily C member 8                                                  | O75937 DNJC8_HUMAN  |                      |                             |             | 0,90<br><b>0,73</b>        | 0,99<br>0,91        | 0,92<br><b>0,77</b>        | 1,05<br>1,11         | <b>0,55</b> <b>0,27</b><br>0,90 <b>0,65</b>         |
| DNAJB1 protein                                                                     | Q6FI51 Q6FI51_HUMAN |                      |                             |             | 0,81                       | 1,09                | 1,04                       |                      |                                                     |
| DNCL1 protein                                                                      | Q6FGH9 Q6FGH9_HUMAN | 0,85                 | <b>1,47</b>                 | 2,56        | 1,11                       | 1,08                | 0,90                       | <b>0,81</b>          | <b>0,37</b> <b>0,20</b>                             |
| DNL-type zinc finger protein                                                       | Q5SXM8 DNLZ_HUMAN   |                      |                             |             |                            |                     |                            |                      |                                                     |
| DOC-1R protein                                                                     | Q6IAV4 Q6IAV4_HUMAN |                      |                             |             |                            |                     |                            | 0,84<br>1,31         | <b>0,17</b> <b>0,09</b><br><b>0,38</b> <b>0,35</b>  |
| Docking protein 2                                                                  | O60496 DOK2_HUMAN   |                      |                             |             | 0,83<br>0,79               | 0,63<br>0,73        | <b>0,58</b><br>0,58        |                      |                                                     |
| Docking protein 3                                                                  | Q7L591 DOK3_HUMAN   | 0,91                 | 0,98                        | 1,19        | 0,94<br><b>0,67</b>        | 0,62<br>0,58        | 0,66<br><b>0,32</b>        |                      |                                                     |
| DOK1 protein                                                                       | Q2TA81 Q2TA81_HUMAN |                      |                             |             | 0,00<br>0,00               | 0,00<br>0,00        | 0,00<br>0,00               |                      |                                                     |
| Dolichyl-diphosphooligosaccharide-protein glycosyltransferase                      | Q5VWA5 Q5VWA5_HUMAN | 1,04<br>0,98         | 1,03<br>1,07                | 0,93        |                            |                     |                            | 1,03<br>0,74         | <b>1,73</b> <b>2,51</b><br><b>1,51</b> <b>2,17</b>  |
| Dolichyl-diphosphooligosaccharide-protein glycosyltransferase subunit 2 precursor  | P04844 RPN2_HUMAN   | 1,02<br>0,96         | 1,03<br><b>1,12</b>         | 0,94        |                            |                     |                            |                      | <b>0,65</b> <b>1,73</b> <b>2,60</b>                 |
| Dolichyl-diphosphooligosaccharide-protein glycosyltransferase subunit DAD1         | P61803 DAD1_HUMAN   | 1,05<br><b>0,82</b>  | 0,92<br>0,96                | 0,90        |                            |                     |                            | 1,15<br>1,23         | <b>2,89</b> <b>2,80</b><br>2,31 <b>2,07</b>         |
| Dolichyl-diphosphooligosaccharide-protein glycosyltransferase subunit STT3A        | P46977 STT3A_HUMAN  | 0,97<br><b>0,88</b>  | 1,04<br>1,05                | 0,95        |                            |                     |                            |                      | 18,16                                               |
| Dolichyl-diphosphooligosaccharide-protein glycosyltransferase subunit STT3B        | Q8TCJ2 STT3B_HUMAN  | 0,99<br><b>0,86</b>  | 1,05<br><b>1,23</b>         | 1,03        |                            |                     |                            | 0,23                 | <b>2,38</b> <b>3,39</b>                             |
| Dolichyl-phosphate beta-glucosyltransferase                                        | Q9Y673 ALG5_HUMAN   | <b>0,87</b><br>0,95  | 1,10<br>1,01                | 0,89        |                            |                     |                            |                      |                                                     |
| Dolichyl-phosphate mannosyltransferase polypeptide 1, catalytic subunit            | Q96HK0 Q96HK0_HUMAN |                      |                             |             |                            |                     |                            |                      |                                                     |
| Dolichyl-phosphate mannosyltransferase polypeptide 1, catalytic subunit (Fragment) | Q5QPK0 Q5QPK0_HUMAN |                      |                             |             |                            |                     |                            |                      |                                                     |
| Dolichyl-phosphate mannosyltransferase polypeptide 3                               | Q5SR62 Q5SR62_HUMAN | 1,04<br>1,12<br>1,01 | <b>1,14</b><br>1,11<br>0,96 | 1,26        |                            |                     |                            |                      |                                                     |
| Dopamine receptor interacting protein 4                                            | Q4W4Y1 Q4W4Y1_HUMAN |                      |                             |             | 0,00                       | 0,00                | 0,00                       |                      |                                                     |
| Drebrin-like protein                                                               | Q9UUJ6 DBNL_HUMAN   |                      |                             |             |                            |                     |                            | 0,89<br>0,55<br>0,97 | 1,63<br><b>0,24</b> <b>0,23</b><br>0,62 <b>0,52</b> |
| DTYMK protein (Fragment)                                                           | Q6FGU2 Q6FGU2_HUMAN | 0,87<br><b>1,11</b>  | 0,97<br>1,09                | <b>1,24</b> |                            |                     |                            | 0,69                 | 0,68 0,56                                           |
| Dual specificity mitogen-activated protein kinase kinase 2                         | P36507 MP2K2_HUMAN  |                      |                             |             |                            |                     |                            | 0,88                 | 0,89 0,76                                           |
| Dual specificity protein phosphatase 23                                            | Q9BVJ7 DUS23_HUMAN  |                      |                             |             |                            |                     |                            | 0,00                 | 0,00 0,00                                           |
| DUSP3 protein                                                                      | Q8IYJ9 Q8IYJ9_HUMAN |                      |                             |             |                            |                     |                            | 0,00                 | 0,00 0,00                                           |
| DUTP pyrophosphatase                                                               | Q6NSA3 Q6NSA3_HUMAN |                      |                             |             | 1,04<br>0,90               | 0,72<br>1,04        | 1,09<br>1,22               |                      |                                                     |
| Dynactin 2 variant (Fragment)                                                      | Q53H88 Q53H88_HUMAN |                      |                             |             | <b>0,81</b><br><b>0,68</b> | 0,92<br>0,80        | 1,04<br>0,87               | 0,94<br>1,51         | <b>1,32</b> 0,94<br>1,05 0,83                       |
| Dynactin subunit 3                                                                 | O75935 DCTN3_HUMAN  |                      |                             |             |                            |                     |                            | 0,60                 | 0,73 <b>0,72</b>                                    |
| Dynamin-2                                                                          | P50570 DYN2_HUMAN   |                      |                             |             |                            |                     |                            |                      | <b>0,62</b> <b>0,75</b> <b>0,65</b>                 |
| Dynamin-like 120 kDa protein, mitochondrial precursor                              | O60313 OPA1_HUMAN   | 0,89<br>1,02         | <b>0,76</b><br>0,98         | <b>0,62</b> |                            |                     |                            |                      |                                                     |
| Dynamin-like protein DYNIV-11 variant (Fragment)                                   | Q59GN9 Q59GN9_HUMAN |                      |                             |             | 0,98                       | 0,98                | 1,09                       |                      |                                                     |
| Dynein heavy chain 12, axonemal                                                    | Q8WXK2 DYH12_HUMAN  |                      |                             |             |                            |                     |                            | 6,04                 | 4,42 5,43                                           |
| Dynein heavy chain 5, axonemal                                                     | Q8TE73 DYH5_HUMAN   |                      |                             |             |                            |                     |                            | 0,94                 | 0,81 0,81                                           |
| Dynein light chain 2, cytoplasmic                                                  | Q96FJ2 DYL2_HUMAN   |                      |                             |             |                            |                     |                            | 0,84                 | <b>0,48</b> <b>0,32</b>                             |
| Dysferlin_v1                                                                       | Q0H395 Q0H395_HUMAN |                      |                             |             |                            |                     |                            |                      |                                                     |
| E2-induced gene 5 protein                                                          | Q96A26 E2IG5_HUMAN  | 0,95<br>0,79<br>0,97 | 0,98<br>0,87<br>1,00        | 0,98        |                            |                     |                            | 1,31<br>1,78         | 1,52<br>1,46 <b>2,74</b>                            |
| E3 ubiquitin-protein ligase CBL                                                    | P22681 CBL_HUMAN    |                      |                             |             | 0,00                       | 0,00                | 0,00                       |                      |                                                     |
| E3 ubiquitin-protein ligase synoviolin precursor                                   | Q86TM6 SYVN1_HUMAN  | 0,89<br>0,95         | 1,23<br>1,11                | 1,36        |                            |                     |                            |                      |                                                     |
| EARS2 protein                                                                      | Q86YH3 Q86YH3_HUMAN | 1,08<br>0,95         | 0,85<br>0,91                | 0,67        |                            |                     |                            |                      |                                                     |
| EBNA-2 co-activator variant (Fragment)                                             | Q59FF0 Q59FF0_HUMAN |                      |                             |             |                            |                     |                            | 1,28<br><b>0,35</b>  | 1,01<br><b>0,54</b> <b>1,57</b><br><b>0,45</b>      |
| EBP protein (Fragment)                                                             | Q6FGL3 Q6FGL3_HUMAN | 0,94                 | 0,99                        | 0,92        |                            |                     |                            | 0,00                 | 0,00 0,00                                           |
| Ectonucleoside triphosphate diphosphohydrolase 1                                   | P49961 ENTP1_HUMAN  | 1,16<br>1,00         | 1,06<br>1,12                | <b>1,29</b> |                            |                     |                            |                      |                                                     |
| EEF1D protein                                                                      | Q96I38 Q96I38_HUMAN |                      |                             |             | <b>0,64</b><br>0,73        | 0,92<br>0,98        | <b>1,25</b><br>1,14        |                      |                                                     |
| EF-hand domain-containing protein D2                                               | Q96C19 EFHD2_HUMAN  | 1,68<br>1,08         | 2,00<br><b>1,20</b>         | 2,31        | 0,78<br>0,71               | <b>1,50</b><br>1,11 | <b>1,78</b><br>1,10        | 1,52                 | 0,73 0,74                                           |
| EH domain-binding protein 1-like protein 1                                         | Q8N3D4 EH1L1_HUMAN  |                      |                             |             |                            |                     |                            |                      |                                                     |
| EH domain-containing protein 4                                                     | Q9H223 EHD4_HUMAN   | 1,01                 | 1,06                        |             | <b>0,73</b><br><b>0,82</b> | 0,74<br><b>0,72</b> | <b>0,72</b><br><b>0,56</b> |                      |                                                     |
| EIF2S2 protein                                                                     | Q96I16 Q96I16_HUMAN |                      |                             |             | 0,70                       | 0,62                | <b>0,70</b>                | 0,91                 | <b>1,57</b> <b>1,65</b>                             |
| EIF3S3 protein                                                                     | Q6IB98 Q6IB98_HUMAN |                      |                             |             | <b>1,21</b><br>1,06        | 1,21<br>1,07        | <b>1,44</b><br>1,14        |                      |                                                     |
| EIF3S4 protein                                                                     | Q6IAM0 Q6IAM0_HUMAN |                      |                             |             | 1,25                       | 0,80                | 1,19                       | 0,60                 | 0,78 0,42                                           |
| EIF4G1 variant protein (Fragment)                                                  | Q4LE58 Q4LE58_HUMAN | 0,83                 | 0,92                        | 0,65        | <b>1,15</b>                | <b>1,16</b>         | 0,99                       | 1,08                 | 0,71 0,51                                           |
| EIF5 protein                                                                       | Q6IBU0 Q6IBU0_HUMAN |                      |                             |             | 0,92<br><b>0,69</b>        | 0,88<br>0,73        | <b>0,78</b><br><b>0,70</b> |                      |                                                     |
| ELAV (Embryonic lethal, abnormal vision, Drosophila)-like 1                        | Q53XN6 Q53XN6_HUMAN |                      |                             |             |                            |                     |                            | <b>0,85</b><br>1,15  | <b>0,18</b> <b>0,14</b><br><b>0,33</b> <b>0,31</b>  |
| Electron transfer flavoprotein subunit beta                                        | P38117 ETFB_HUMAN   | <b>0,86</b><br>0,95  | 0,99<br><b>0,95</b>         | <b>0,74</b> | <b>1,49</b><br>1,81        | <b>1,25</b><br>1,31 | 1,43<br>0,88               |                      |                                                     |
| Electron transfer flavoprotein ubiquinone oxidoreductase                           | Q547S8 Q547S8_HUMAN | 1,05<br>1,01         | 0,86<br>0,96                | 0,81        |                            |                     |                            |                      |                                                     |

|                                                                    |                     |                      |                      |       |                      |                      |                      |              |              |              |
|--------------------------------------------------------------------|---------------------|----------------------|----------------------|-------|----------------------|----------------------|----------------------|--------------|--------------|--------------|
| Electron-transfer-flavoprotein, alpha polypeptide                  | Q53XN3 Q53XN3_HUMAN | 0,87<br>1,01         | 0,93<br>0,89         | 0,87  | 1,97<br>1,80         | 1,73<br>1,37         | 1,76<br>1,42         |              |              |              |
| ELMO domain-containing protein 2                                   | Q8IZ81 ELMD2_HUMAN  | 0,00<br>0,96         | 0,00<br>1,13         | 0,00  |                      |                      |                      |              |              |              |
| Elongation factor 1-alpha                                          | Q6IPT9 Q6IPT9_HUMAN |                      |                      |       | 0,73<br>0,86         | 0,93<br>1,02         | 0,62<br>0,72         | 1,19         | 1,31         | 1,68         |
| Elongation factor 1-alpha (Fragment)                               | Q53HQ7 Q53HQ7_HUMAN | 1,37<br>1,49         | 3,76<br>2,83         | 10,04 |                      |                      |                      | 0,36         | 1,23         | 1,03         |
| Elongation factor 1-beta                                           | P24534 EF1B_HUMAN   |                      |                      |       | 0,70<br>0,54         | 1,01<br>0,89         | 1,17<br>0,96         | 0,70<br>0,91 | 1,99<br>1,90 | 1,92<br>1,54 |
| Elongation factor 2                                                | P13639 EF2_HUMAN    | 1,35<br>1,39         | 1,88<br>1,55         | 4,83  | 0,93<br>0,95         | 1,07<br>1,08         | 0,88<br>1,10         | 1,57<br>0,54 | 1,95<br>1,64 | 3,48<br>1,39 |
| Elongation factor G 1, mitochondrial precursor                     | Q96RP9 EFG1_HUMAN   | 0,94<br>0,97         | 0,90<br>0,97         | 0,74  |                      |                      |                      |              |              |              |
| Elongation factor G isoform                                        | A0AR28 A0AR28_HUMAN |                      |                      |       |                      |                      |                      |              |              |              |
| Elongation factor Ts, mitochondrial precursor                      | P43897 EFTS_HUMAN   | 0,94<br>0,79<br>0,99 | 1,05<br>0,81<br>0,95 | 0,73  |                      |                      |                      |              |              |              |
| Elongation factor Tu, mitochondrial precursor                      | P49411 EFTU_HUMAN   | 0,98<br>1,05         | 0,96<br>0,93         | 0,84  | 1,91<br>2,11         | 1,39<br>1,34         | 1,21<br>1,32         | 0,00         | 0,00         | 0,00         |
| Elongation of very long chain fatty acids protein 1                | Q9BW60 ELOV1_HUMAN  |                      |                      |       |                      |                      |                      |              |              |              |
| Elongation of very long chain fatty acids protein 5                | Q9NYP7 ELOV5_HUMAN  |                      |                      |       |                      |                      |                      |              |              |              |
| EMD protein                                                        | Q6FI02 Q6FI02_HUMAN | 0,86<br>0,82         | 0,68<br>1,05         | 1,16  |                      |                      |                      | 1,02<br>1,28 | 0,78<br>0,86 | 0,67<br>0,78 |
| Ena/VASP-like protein                                              | Q9UI08 EVL_HUMAN    | 1,81<br>0,98         | 2,54<br>1,10         | 9,31  | 0,86<br>0,84         | 1,12<br>1,03         | 1,08<br>0,92         | 0,85<br>0,98 | 0,90<br>1,10 | 0,38<br>0,63 |
| Endoglin                                                           | Q5T9C0 Q5T9C0_HUMAN | 0,00<br>0,89         | 0,00<br>0,80         | 0,00  |                      |                      |                      |              |              |              |
| Endophilin-B1                                                      | Q9Y371 SHLB1_HUMAN  |                      |                      |       | 0,73                 | 0,88                 | 0,63                 |              |              |              |
| Endoplasmic reticulum aminopeptidase 1                             | Q9NZ08 ERAP1_HUMAN  | 0,87<br>1,05         | 1,00<br>1,13         | 0,87  |                      |                      |                      |              |              |              |
| Endoplasmic reticulum aminopeptidase 2                             | Q6P179 ERAP2_HUMAN  | 1,07<br>0,99         | 1,14<br>1,06         | 0,83  |                      |                      |                      |              |              |              |
| Endoplasmic reticulum metalloproteinase 1                          | Q7Z2K6 ERMP1_HUMAN  | 0,78<br>1,05         | 1,04<br>0,98         | 0,99  |                      |                      |                      |              |              |              |
| Endoplasmic reticulum protein ERp29 precursor                      | P30040 ERP29_HUMAN  | 0,87<br>1,01         | 0,97<br>1,11         | 0,80  | 1,87<br>1,54         | 1,10<br>1,16         | 2,17<br>1,52         | 1,34<br>1,31 | 2,90<br>2,30 | 4,39<br>2,92 |
| Endoplasmic reticulum-Golgi intermediate compartment protein 1     | Q969X5 ERG1_HUMAN   |                      |                      |       |                      |                      |                      |              |              |              |
| Endoplasmic reticulum-Golgi intermediate compartment protein 3     | Q9Y282 ERGI3_HUMAN  | 1,18<br>1,41<br>1,13 | 1,23<br>0,84<br>1,25 | 0,96  |                      |                      |                      |              |              |              |
| Endothelial differentiation inhibitory protein D18                 | Q4G5Y3 Q4G5Y3_HUMAN |                      |                      |       |                      |                      |                      | 0,88         | 0,66         | 0,57         |
| Endothelial differentiation-related factor 1                       | O60869 EDF1_HUMAN   |                      |                      |       |                      |                      |                      | 0,97<br>1,03 | 0,39<br>0,57 | 0,29<br>0,61 |
| Engulfment and cell motility protein 1                             | Q92556 ELMO1_HUMAN  |                      |                      |       | 1,25                 | 1,27                 | 1,04                 |              |              |              |
| Enhancer of rudimentary homolog                                    | P84090 ERH_HUMAN    |                      |                      |       |                      |                      |                      | 0,86<br>0,97 | 0,56<br>1,04 | 0,25<br>0,65 |
| Enolase (Fragment)                                                 | Q53FT9 Q53FT9_HUMAN | 1,48<br>1,53         | 2,01<br>1,58         | 2,01  |                      |                      |                      | 0,88         | 0,61         | 0,44         |
| Enoyl Coenzyme A hydratase domain containing 3                     | Q96DC8 Q96DC8_HUMAN |                      |                      |       |                      |                      |                      |              |              |              |
| Enoyl-CoA hydratase, mitochondrial precursor                       | P30084 ECHM_HUMAN   | 0,69<br>0,85<br>1,05 | 0,88<br>0,88<br>1,04 | 0,68  | 1,72<br>1,62         | 1,47<br>1,23         | 2,82<br>1,68         |              |              |              |
| Enoyl-Coenzyme A, hydratase/3-hydroxyacyl Coenzyme A dehydrogenase | Q58EZ5 Q58EZ5_HUMAN |                      |                      |       |                      |                      |                      |              |              |              |
| Eosinophil cationic protein precursor                              | P12724 ECP_HUMAN    | 0,97                 | 1,12                 |       |                      |                      |                      |              |              |              |
| Epidermal growth factor receptor substrate 15-like 1               | Q9UBC2 EP15R_HUMAN  |                      |                      |       |                      |                      |                      |              |              |              |
| Epididymal secretory protein E1 precursor                          | P61916 NPC2_HUMAN   | 1,10<br>1,08<br>0,93 | 0,92<br>1,41<br>0,95 |       |                      |                      |                      |              |              |              |
| Epoxide hydrolase 1                                                | P07099 HYEP_HUMAN   | 1,10<br>0,93         | 0,92<br>1,16<br>1,18 | 1,11  | 1,65<br>1,37         | 1,07<br>0,97         | 1,55<br>1,55         |              |              |              |
| Equilibrative nucleoside transporter 3                             | Q9BZD2 S29A3_HUMAN  |                      |                      |       |                      |                      |                      |              |              |              |
| ER lipid raft associated 1                                         | B0QZ42 B0QZ42_HUMAN |                      |                      |       |                      |                      |                      |              |              |              |
| ER lumen protein retaining receptor                                | Q6IPC5 Q6IPC5_HUMAN | 0,95                 | 1,01                 |       |                      |                      |                      |              |              |              |
| ER lumen protein retaining receptor 2                              | P33947 ERD22_HUMAN  | 1,05<br>0,89         | 0,64<br>0,80         | 0,78  |                      |                      |                      |              |              |              |
| Erlin-1                                                            | O75477 ERLN1_HUMAN  |                      |                      |       |                      |                      |                      |              |              |              |
| Erlin-2                                                            | O94905 ERLN2_HUMAN  | 1,85<br>0,91<br>0,95 | 2,51<br>1,22<br>1,16 | 2,32  |                      |                      |                      |              |              |              |
| ERO1-like protein alpha precursor                                  | Q96HE7 ERO1A_HUMAN  | 0,91<br>0,95         | 1,22<br>1,16         | 1,11  |                      |                      |                      |              |              |              |
| Erythrocyte band 7 integral membrane protein                       | Q96HE7 ERO1A_HUMAN  | 0,92                 | 1,03                 | 0,96  | 1,62                 | 1,17                 | 1,51                 |              |              |              |
| Erythrocyte band 7 integral membrane protein                       | P27105 STOM_HUMAN   | 0,97<br>0,91         | 1,18<br>0,66         | 1,22  |                      |                      |                      | 1,17         | 2,04         | 2,70         |
| Erythrocyte membrane protein band 4,1-like 2                       | Q5T4F0 Q5T4F0_HUMAN | 0,98<br>1,02         | 0,91<br>1,22         | 1,03  |                      |                      |                      |              |              |              |
| ES1 protein homolog, mitochondrial precursor                       | P30042 ES1_HUMAN    | 0,94<br>0,93         | 0,80<br>0,89         | 0,62  | 2,30<br>1,74         | 2,08<br>1,81         | 3,19<br>1,95         |              |              |              |
| Estradiol 17-beta-dehydrogenase 11 precursor                       | Q8NBQ5 DHB11_HUMAN  | 1,11<br>1,00         | 1,12<br>1,12         | 1,26  |                      |                      |                      |              |              |              |
| Estradiol 17-beta-dehydrogenase 12                                 | Q53GQ0 DHB12_HUMAN  | 0,88<br>0,91         | 1,00<br>1,10         | 1,00  |                      |                      |                      | 0,98<br>0,78 | 3,65<br>3,63 | 6,67<br>7,03 |
| Estradiol 17-beta-dehydrogenase 8                                  | Q92506 DHB8_HUMAN   |                      |                      |       | 1,86                 | 1,09                 | 0,93                 |              |              |              |
| ETF1 protein                                                       | Q96CG1 Q96CG1_HUMAN | 0,92                 | 1,00                 |       |                      |                      |                      |              |              |              |
| Ethanolamine-phosphate cytidylyltransferase                        | Q99447 PCY2_HUMAN   |                      |                      |       | 0,89                 | 0,86                 | 0,78                 |              |              |              |
| ETHE1 protein, mitochondrial precursor                             | O95571 ETHE1_HUMAN  | 0,00                 | 0,00                 | 0,00  |                      |                      |                      |              |              |              |
| Eukaryotic initiation factor 4A-I                                  | P60842 IF4A1_HUMAN  | 1,03<br>1,00         | 1,06<br>0,91         | 0,68  | 1,73<br>0,81<br>0,89 | 1,14<br>0,90<br>0,80 | 1,30<br>0,62<br>0,85 |              |              |              |
| Eukaryotic initiation factor 4B                                    | Q8WYK5 Q8WYK5_HUMAN | 1,64                 | 6,42                 | 14,83 | 0,94<br>0,71         | 0,95<br>0,69         | 0,74<br>0,69         | 0,89<br>1,50 | 0,30<br>0,49 | 0,20<br>0,36 |
| Elongation factor 1- gamma                                         | P26641 EF1G_HUMAN   |                      |                      |       | 0,85<br>0,76         | 1,18<br>1,11         | 1,28<br>1,08         | 0,81<br>0,46 | 1,68<br>1,19 | 2,24<br>1,04 |
| Eukaryotic translation initiation factor 1A, X-chromosomal         | P47813 IF1AX_HUMAN  | 0,00                 | 0,00                 |       |                      |                      |                      | 0,97<br>1,20 | 1,28<br>1,42 | 1,11<br>1,41 |
| Eukaryotic translation initiation factor 2A                        | Q9BY44 EIF2A_HUMAN  |                      |                      |       |                      |                      |                      | 0,56<br>0,89 | 0,73<br>0,64 | 0,60<br>0,81 |
| Eukaryotic translation initiation factor 3 subunit A               | Q14152 EIF3A_HUMAN  |                      |                      |       |                      |                      |                      |              |              |              |
| Eukaryotic translation initiation factor 3 subunit B               | P55884 EIF3B_HUMAN  |                      |                      |       | 1,19<br>1,35         | 1,12<br>1,84         | 1,11<br>2,21         |              |              |              |
| Eukaryotic translation initiation factor 3 subunit C               | Q99613 EIF3C_HUMAN  |                      |                      |       | 0,89<br>1,88         | 1,05<br>2,39         | 1,24<br>1,85         | 0,82<br>0,98 | 0,69<br>0,87 | 0,68<br>0,65 |
| Eukaryotic translation initiation factor 3 subunit J               | O75822 EIF3J_HUMAN  |                      |                      |       | 0,77<br>0,52         | 0,92<br>0,81         | 1,01<br>0,93         | 0,73<br>1,04 | 0,64<br>0,86 | 0,69<br>0,89 |
|                                                                    | Q5U0F4 Q5U0F4_HUMAN |                      |                      |       | 1,16                 | 1,21                 | 1,14                 |              |              |              |

|                                                                                          |                     |                            |                            |             |                            |                            |                            |                            |                                                       |
|------------------------------------------------------------------------------------------|---------------------|----------------------------|----------------------------|-------------|----------------------------|----------------------------|----------------------------|----------------------------|-------------------------------------------------------|
| Eukaryotic translation initiation factor 3, subunit 2 beta, 36kDa                        |                     |                            |                            |             |                            |                            |                            |                            |                                                       |
| Eukaryotic translation initiation factor 3, subunit A                                    | Q24JU4 Q24JU4_HUMAN |                            |                            |             | 1,03<br><b>1,31</b>        | 1,10<br><b>1,23</b>        | 1,36<br><b>1,52</b>        |                            |                                                       |
| Eukaryotic translation initiation factor 3, subunit E                                    | Q8WVK4 Q8WVK4_HUMAN |                            |                            |             | 0,85                       | 0,89                       | 0,75                       |                            |                                                       |
| Eukaryotic translation initiation factor 3, subunit E interacting protein                | B0QY89 B0QY89_HUMAN |                            |                            |             | 0,88                       | 0,93                       | 0,95                       |                            |                                                       |
| Eukaryotic translation initiation factor 4 gamma 1                                       | Q04637 IF4G1_HUMAN  |                            |                            |             | 1,01                       | 0,97                       | 0,80                       | 0,88                       | 0,86 0,87                                             |
| Eukaryotic translation initiation factor 4 gamma, 2 variant (Fragment)                   | Q59G42 Q59G42_HUMAN |                            |                            |             | 0,75                       | 0,88                       | 0,38                       |                            |                                                       |
| Eukaryotic translation initiation factor 4E                                              | Q32Q75 Q32Q75_HUMAN |                            |                            |             |                            |                            |                            | 1,08                       | 0,68 0,75                                             |
| Eukaryotic translation initiation factor 4H                                              | Q15056 IF4H_HUMAN   |                            |                            |             | 0,91<br><b>0,57</b>        | 0,87<br><b>0,72</b>        | <b>0,62</b><br><b>0,67</b> | 1,10<br>0,89               | <b>0,68</b><br>0,63 <b>0,42</b><br><b>0,57</b>        |
| Eukaryotic translation initiation factor 5A-1                                            | P63241 IF5A1_HUMAN  | 0,94                       | <b>2,76</b>                | <b>7,19</b> | <b>0,79</b><br>0,57        | 0,90<br><b>0,72</b>        | <b>0,68</b><br>0,55        | <b>1,24</b><br><b>1,37</b> | <b>2,15</b><br><b>2,19</b> <b>1,44</b><br><b>1,53</b> |
| Eukaryotic translation initiation factor 5B                                              | Q8N5A0 Q8N5A0_HUMAN |                            |                            |             |                            |                            |                            | 1,14<br>1,10               | 2,31<br><b>2,20</b> <b>2,14</b><br><b>1,96</b>        |
| EVH1 domain binding protein                                                              | Q9NZI9 Q9NZI9_HUMAN |                            |                            |             | 1,08                       | 1,76                       | 1,98                       |                            |                                                       |
| Evolutionarily conserved signaling intermediate in Toll pathway, mitochondrial precursor | Q9BQ95 ECSIT_HUMAN  | 0,00<br>0,93               | 0,00<br>0,93               | 0,00        |                            |                            |                            |                            |                                                       |
| Exosome complex exonuclease MTR3                                                         | Q5RKV6 EXOS6_HUMAN  |                            |                            |             |                            |                            |                            | 0,00                       | 0,00 0,00                                             |
| Exportin-1                                                                               | O14980 XPO1_HUMAN   |                            |                            |             | 0,00                       | 0,00                       | 0,00                       |                            |                                                       |
| Exportin-2                                                                               | P55060 XPO2_HUMAN   |                            |                            |             | 1,28<br>0,85               | 1,43<br>0,62               | 1,51<br>0,60               |                            |                                                       |
| Extended-synaptotagmin-1                                                                 | Q9BSJ8 ESYT1_HUMAN  | 1,00<br>1,03               | 0,98<br><b>1,20</b>        | 1,03        | <b>2,03</b><br><b>2,43</b> | 1,30<br>1,88               | <b>1,40</b><br>1,44        | 2,19<br><b>0,70</b>        | <b>3,25</b><br>1,80 <b>4,15</b><br>2,72               |
| Extracellular signal-related kinase 1c                                                   | Q8NHX0 Q8NHX0_HUMAN |                            |                            |             |                            |                            |                            |                            |                                                       |
| Ezrin                                                                                    | P15311 EZR1_HUMAN   |                            |                            |             | 1,09<br>0,95               | 0,89<br>1,04               | 0,52<br><b>1,14</b>        | <b>1,50</b><br>1,04        | 1,01<br>1,03 <b>1,19</b><br><b>1,12</b>               |
| Ezrin-radixin-moesin-binding phosphoprotein 50                                           | O14745 NHERF_HUMAN  | <b>1,67</b>                | <b>1,48</b>                |             | <b>0,84</b><br>1,16        | 0,99<br>0,90               | 0,94<br><b>0,68</b>        |                            |                                                       |
| FABP3 protein                                                                            | Q6IBD7 Q6IBD7_HUMAN |                            |                            |             | 0,55<br>0,92               | 0,74<br>1,02               | <b>0,63</b><br>0,99        |                            |                                                       |
| FABP4 protein                                                                            | Q6IBA1 Q6IBA1_HUMAN |                            |                            |             | <b>1,23</b><br><b>0,77</b> | <b>1,65</b><br>1,14        | 1,20<br>1,01               |                            |                                                       |
| F-actin-capping protein subunit alpha-1                                                  | P52907 CAZA1_HUMAN  |                            |                            |             | 1,01                       | 1,15                       | 1,10                       | 1,23                       | <b>1,94</b> 1,49                                      |
| F-actin-capping protein subunit alpha-2                                                  | P47755 CAZA2_HUMAN  | 0,96                       | 0,96                       |             | 1,11                       | 1,12                       | 1,13                       | 1,18                       | 1,58 1,10                                             |
|                                                                                          | Q96CU9 FXRD1_HUMAN  |                            |                            |             | 1,04                       | 0,93                       | 0,89                       |                            |                                                       |
| FAD-dependent oxidoreductase domain-containing protein 1                                 |                     | 1,03                       | 0,95                       |             |                            |                            |                            |                            |                                                       |
| Family with sequence similarity 129, member B                                            | Q5VVW7 Q5VVW7_HUMAN |                            |                            |             | 0,88<br><b>0,81</b>        | 0,93<br>0,89               | 1,09<br>0,87               |                            |                                                       |
| Family with sequence similarity 39, member B                                             | Q76LA1 Q76LA1_HUMAN |                            |                            |             |                            |                            |                            | 0,87                       | 1,56 2,07                                             |
| Far upstream element-binding protein 1                                                   | Q96AE4 FUBP1_HUMAN  |                            |                            |             |                            |                            |                            |                            |                                                       |
| Far upstream element-binding protein 2                                                   | Q92945 FUBP2_HUMAN  |                            |                            |             | 1,08<br>1,07               | <b>1,43</b><br>1,27        | 1,22<br>1,17               | <b>1,54</b><br><b>1,16</b> | <b>0,53</b><br><b>0,33</b> <b>0,51</b><br><b>0,33</b> |
| Far upstream element-binding protein 3                                                   | Q96I24 FUBP3_HUMAN  |                            |                            |             | 1,06<br><b>1,39</b>        | 1,23                       |                            | <b>0,77</b><br><b>0,60</b> | <b>0,53</b><br><b>0,53</b>                            |
| Farnesyl diphosphate synthase                                                            | Q96G29 Q96G29_HUMAN |                            |                            |             |                            |                            |                            | 1,00                       | 0,17 0,12                                             |
| Fas apoptotic inhibitory molecule 2                                                      | Q9BWQ8 FAIM2_HUMAN  | 1,07                       | 0,97                       |             | 0,82<br>0,88               | <b>0,70</b><br>0,91        | 0,74<br><b>0,69</b>        |                            |                                                       |
| FASN variant protein (Fragment)                                                          | Q4LE83 Q4LE83_HUMAN | 0,82                       | <b>0,70</b>                | 0,74        | 0,00<br>1,76               | 0,00<br>1,17               | 0,00<br>1,36               |                            |                                                       |
| FAST kinase domain-containing protein 2                                                  | Q9NYY8 FAKD2_HUMAN  |                            |                            |             | <b>0,85</b><br>1,01        | 0,99<br><b>1,16</b>        | 1,00<br><b>1,20</b>        |                            |                                                       |
| FAST kinase domain-containing protein 5                                                  | Q7L8L6 FAKD5_HUMAN  | 1,05                       | 1,06                       |             |                            |                            |                            |                            |                                                       |
| Fatty acid-binding protein, epidermal                                                    | Q01469 FABP5_HUMAN  | 0,99<br>1,55               | 0,98<br><b>1,52</b>        | <b>1,90</b> | <b>0,80</b><br><b>0,63</b> | 1,03<br>0,91               | <b>0,86</b><br><b>0,76</b> |                            |                                                       |
| Fatty acyl-CoA reductase 1                                                               | Q8WVX9 FACR1_HUMAN  | 0,90<br>0,97               | 0,85<br>1,08               | <b>0,74</b> |                            |                            |                            |                            |                                                       |
| Fc gamma receptor I                                                                      | Q92637 Q92637_HUMAN | 0,00                       | 0,00                       | 0,00        |                            |                            |                            |                            |                                                       |
| Fc of IgG, low affinity IIa, receptor                                                    | Q8WW64 Q8WW64_HUMAN |                            |                            |             |                            |                            |                            |                            |                                                       |
| FCH and double SH3 domains protein 2                                                     | O94868 FCSD2_HUMAN  | 1,02                       | 0,92                       |             | 0,00<br>0,00               | 0,00<br>0,00               | 0,00<br>0,00               |                            |                                                       |
| FDF1 protein                                                                             | Q6IAX1 Q6IAX1_HUMAN | 0,98<br>0,88               | 1,03<br>0,98               | 1,05        |                            |                            |                            |                            |                                                       |
| FEN1 protein                                                                             | Q6FHX6 Q6FHX6_HUMAN |                            |                            |             |                            |                            |                            | 0,82                       | <b>0,31</b> <b>0,26</b>                               |
| Fermitin family homolog 3                                                                | Q86UX7 URP2_HUMAN   | <b>1,38</b><br>1,14        | <b>2,08</b><br><b>1,69</b> | <b>4,88</b> | 0,00<br>1,04               | 0,00<br>1,69               | 0,00<br>1,47               | 0,85                       | 1,79 1,50                                             |
| Ferredoxin reductase                                                                     | Q6GSK2 Q6GSK2_HUMAN | 0,89<br>0,96               | 0,80<br>0,95               | 0,60        |                            |                            |                            |                            |                                                       |
| Ferritin                                                                                 | Q6NZ44 Q6NZ44_HUMAN | 0,82                       | <b>0,63</b>                |             | 0,93                       | 0,95                       | 1,04                       |                            |                                                       |
| Ferritin (Fragment)                                                                      | Q6NS36 Q6NS36_HUMAN | 1,11                       | 1,41                       | 0,62        |                            |                            |                            |                            |                                                       |
| Ferritin, light polypeptide                                                              | Q8WU07 Q8WU07_HUMAN |                            |                            |             | 0,85                       | 1,46                       | 1,10                       |                            |                                                       |
| Ferritin light polypeptide variant                                                       | Q6S4P3 Q6S4P3_HUMAN | 1,08<br>0,94               | 0,93<br>1,01               | 0,83        | 0,88<br>1,09               | <b>0,88</b><br><b>0,91</b> | 1,00<br><b>1,11</b>        |                            |                                                       |
| Ferrochelatase                                                                           | Q7KZA3 Q7KZA3_HUMAN |                            |                            |             |                            |                            |                            |                            |                                                       |
| Ferrochelatase (Fragment)                                                                | Q53FU1 Q53FU1_HUMAN | 1,00<br>0,96               | 1,00<br>0,90               | 0,80        |                            |                            |                            |                            |                                                       |
| FH1/FH2 domain-containing protein 1                                                      | Q9Y613 FHOD1_HUMAN  |                            |                            |             | 1,29                       | 0,84                       | 0,81                       |                            |                                                       |
| Fibrinogen-like 2 variant (Fragment)                                                     | Q53GD2 Q53GD2_HUMAN | 0,94<br>0,92               | 0,91<br>0,89               | 1,20        |                            |                            |                            |                            |                                                       |
| Ficolin (Collagen/fibrinogen domain containing) 1                                        | Q5VYV5 Q5VYV5_HUMAN | 1,00                       | 0,99                       |             |                            |                            |                            |                            |                                                       |
| Filamin A                                                                                | P21333 FLNA_HUMAN   | <b>1,49</b><br><b>1,52</b> | <b>1,87</b><br><b>1,51</b> | <b>4,62</b> | <b>0,91</b><br>1,02        | 1,01<br>1,04               | <b>0,96</b><br>1,00        | <b>1,26</b><br>0,24        | <b>0,43</b><br>0,28 <b>0,76</b><br>0,26               |
| Filamin B                                                                                | Q60FE7 Q60FE7_HUMAN |                            |                            |             | 0,89<br>0,89               | 1,10<br>1,07               | 1,00<br>1,21               |                            |                                                       |
| FK506 binding protein 5                                                                  | Q5TGM6 Q5TGM6_HUMAN |                            |                            |             | 0,92<br>0,90               | 1,01<br>1,18               | 0,85<br>0,92               |                            |                                                       |
| FK506-binding protein 15                                                                 | Q5T1M5 FKB15_HUMAN  |                            |                            |             |                            |                            |                            | 0,86<br>0,82               | <b>0,51</b><br>0,68 <b>0,57</b><br><b>0,32</b>        |
| FK506-binding protein 3                                                                  | Q00688 FKBP3_HUMAN  |                            |                            |             | <b>0,71</b>                | <b>0,82</b>                | 0,89                       | <b>0,86</b><br><b>1,26</b> | <b>0,64</b><br>0,97 <b>0,48</b><br>0,90               |
| FK506-binding protein 4                                                                  | Q02790 FKBP4_HUMAN  |                            |                            |             | <b>0,78</b><br>0,97        | 0,89<br>0,88               | <b>0,78</b><br>0,99        |                            |                                                       |
| Flavin reductase                                                                         | P30043 BLVRB_HUMAN  |                            | 2,82                       | 6,52        | 0,83<br>0,80               | <b>0,74</b><br>0,82        | <b>0,59</b><br><b>0,53</b> |                            |                                                       |
| FLJ00395 protein (Fragment)                                                              | Q6ZNI9 Q6ZNI9_HUMAN | 1,13                       | 1,12                       |             |                            |                            |                            |                            |                                                       |

|                                                                                                              |                     |              |              |      |              |              |              |              |              |               |
|--------------------------------------------------------------------------------------------------------------|---------------------|--------------|--------------|------|--------------|--------------|--------------|--------------|--------------|---------------|
| FLOT2 protein                                                                                                | Q6FG43 Q6FG43_HUMAN | 1,17<br>1,20 | 1,26<br>1,19 | 1,29 |              |              |              | 1,35<br>0,92 | 0,95<br>1,20 | 2,49<br>1,27  |
| Flotillin 1                                                                                                  | Q5ST80 Q5ST80_HUMAN | 0,99<br>1,09 | 1,28<br>1,11 | 1,06 | 1,28         | 0,84         | 0,85         |              |              |               |
| Formin-like protein 1                                                                                        | Q95466 FMNL_HUMAN   | 1,14<br>1,04 | 2,14<br>1,07 | 2,94 |              |              |              |              |              |               |
| Frataxin, mitochondrial precursor                                                                            | Q16595 FRDA_HUMAN   | 1,01         | 0,94         |      |              |              |              |              |              |               |
| Fructose-bisphosphate aldolase A                                                                             | P04075 ALDOA_HUMAN  | 1,37<br>1,50 | 2,03<br>1,83 | 3,65 | 0,86<br>0,96 | 0,92<br>0,99 | 0,97<br>1,00 | 1,40<br>0,69 | 0,79<br>0,98 | 1,63<br>1,36  |
| Fructose-bisphosphate aldolase C                                                                             | P09972 ALDOC_HUMAN  |              |              |      | 0,00         | 0,00         | 0,00         |              |              |               |
| FSCN1 protein (Fragment)                                                                                     | Q96IH1 Q96IH1_HUMAN |              |              |      | 1,06         | 1,29         | 1,51         |              |              |               |
| FtsH homolog                                                                                                 | Q9Y2Q2 Q9Y2Q2_HUMAN |              |              |      |              |              |              | 0,80<br>1,31 | 0,80<br>1,60 | 0,74<br>1,40  |
| Full-length cDNA 5-PRIME end of clone CS0DF013YM24 of Fetal brain of Homo sapiens (Human) variant (Fragment) | Q53GF9 Q53GF9_HUMAN | 1,20         | 1,01         | 1,08 |              |              |              | 0,93<br>2,05 | 6,69<br>4,64 | 10,09<br>7,51 |
| Full-length cDNA clone CS0DC004YJ14 of Neuroblastoma of Homo sapiens (Fragment)                              | Q86TW1 Q86TW1_HUMAN |              |              |      |              |              |              | 0,00         | 0,00         | 0,00          |
| Full-length cDNA clone CS0DJ012YD11 of T cells (Jurkat cell line) of Homo sapiens                            | Q86SZ6 Q86SZ6_HUMAN | 0,97         | 0,91         |      |              |              |              |              |              |               |
| Full-length cDNA clone CS0DL010YH08 of B cells (Ramos cell line) of Homo sapiens                             | Q96QL0 Q96QL0_HUMAN | 0,79         | 0,53         | 0,85 |              |              |              | 0,95         | 1,39         | 2,08          |
| Full-length cDNA clone CS0DL010YH08 of B cells (Ramos cell line) of Homo sapiens                             | Q53XC0 Q53XC0_HUMAN |              |              |      | 0,81         | 0,71         | 0,76         |              |              |               |
| Full-length cDNA clone CS0DM004YH09 of Fetal liver of Homo sapiens                                           | Q53XB6 Q53XB6_HUMAN | 1,35         | 1,24         |      |              |              |              | 0,60<br>1,38 | 1,44<br>4,64 | 1,45<br>7,54  |
| Fumarate hydratase, mitochondrial precursor                                                                  | P07954 FUMH_HUMAN   | 1,23<br>1,01 | 1,63<br>0,92 | 0,77 | 0,88         | 1,11         | 1,08         | 0,56         | 2,91         | 3,18          |
| Fumarylacetoacetate hydrolase domain-containing protein 1                                                    | Q6P587 FAHD1_HUMAN  | 0,95<br>0,79 | 0,93<br>0,86 | 0,50 | 1,34<br>1,49 | 1,21<br>1,27 | 1,92<br>1,69 |              |              |               |
| Fumarylacetoacetate hydrolase domain-containing protein 2A                                                   | Q96GK7 FAH2A_HUMAN  | 0,94         | 0,90         |      |              |              |              |              |              |               |
| FUN14 domain containing 2 (Fragment)                                                                         | Q5HYP8 Q5HYP8_HUMAN | 0,99<br>1,02 | 1,12<br>1,04 | 0,85 |              |              |              |              | 11,42        | 12,61         |
| Fusion                                                                                                       | Q8TBR3 Q8TBR3_HUMAN | 1,07<br>1,09 |              |      |              |              |              |              |              |               |
| Fusion protein SYT-SSX2                                                                                      | Q8TBR3 Q8TBR3_HUMAN | 0,85         | 0,94         |      | 0,97         | 1,01         | 0,61         | 1,58         | 0,73         | 0,66          |
| FUS interacting protein (Serine/arginine-rich) 1                                                             | A4PIW0 A4PIW0_HUMAN |              |              |      |              |              |              | 1,15         | 0,62         | 0,64          |
| FUS interacting protein (Serine-arginine rich) 1 isoform 2 variant (Fragment)                                | Q5JRI0 Q5JRI0_HUMAN |              |              |      |              |              |              | 0,74         | 0,58         | 0,68          |
| FUS interacting protein (Serine-arginine rich) 1 isoform 2 variant (Fragment)                                | Q53GD7 Q53GD7_HUMAN |              |              |      |              |              |              | 0,83         | 0,27         | 0,20          |
| Fus-like protein (Fragment)                                                                                  | Q13344 Q13344_HUMAN | 1,18         | 1,50         | 2,30 | 1,18         | 1,28         | 0,61         | 1,32         | 0,38         | 0,14          |
| FWP004                                                                                                       | Q5QTS3 Q5QTS3_HUMAN |              |              |      |              |              |              |              |              |               |
| G3BP protein                                                                                                 | Q6FI03 Q6FI03_HUMAN |              |              |      | 1,24         | 1,10         | 0,91         |              |              |               |
| GABARAPL2 protein                                                                                            | Q6FG91 Q6FG91_HUMAN |              |              |      | 1,57<br>1,60 | 1,06<br>1,08 | 0,81<br>0,86 | 0,78         | 0,42         | 0,22          |
| Galactocerebrosidase precursor                                                                               | P54803 GALC_HUMAN   |              |              |      | 0,70         | 0,80         | 0,64         |              |              |               |
| Galactosidase, alpha                                                                                         | P54803 GALC_HUMAN   | 0,91         | 1,11         |      |              |              |              |              |              |               |
| Galectin-1                                                                                                   | Q53Y83 Q53Y83_HUMAN |              |              |      | 1,76         | 0,79         | 0,89         |              |              |               |
| Galectin-3                                                                                                   | P09382 LEG1_HUMAN   | 2,73<br>1,96 | 5,82<br>2,78 | 3,97 | 1,19<br>1,11 | 0,84<br>0,88 | 0,87<br>0,94 | 4,07<br>2,88 | 2,50<br>3,06 | 1,78<br>1,72  |
| Galectin-9                                                                                                   | P17931 LEG3_HUMAN   | 1,07<br>1,36 | 0,97<br>1,08 | 0,77 | 1,15         | 1,02         | 1,08         |              |              |               |
| Galectin-9-like protein                                                                                      | O00182 LEG9_HUMAN   | 1,59<br>1,07 | 1,29<br>1,42 | 1,12 |              |              |              | 2,09<br>0,66 | 0,92<br>0,49 | 1,13<br>0,56  |
| Galphai2 protein                                                                                             | Q3B8N2 LEG9L_HUMAN  |              |              |      | 0,00         | 0,00         | 0,00         |              |              |               |
| Gamma-glutamyl hydrolase precursor                                                                           | Q6B6N3 Q6B6N3_HUMAN |              |              |      |              |              |              | 1,00         | 1,21         | 1,21          |
| Gamma-interferon-inducible lysosomal thiol reductase precursor                                               | Q92820 GGH_HUMAN    | 0,68         | 1,32         | 0,99 | 1,47         | 1,41         | 1,30         | 0,00<br>1,94 | 0,00<br>0,63 | 0,00<br>0,92  |
| Gamma-interferon-inducible protein Ifi-16                                                                    | P13284 GILT_HUMAN   | 1,08         | 0,93         |      |              |              |              |              |              |               |
| Gamma-parvin                                                                                                 | Q16666 IF16_HUMAN   |              |              |      | 0,00         | 0,00         | 0,00         | 0,73<br>0,45 | 0,44<br>0,76 | 0,42<br>0,67  |
| Gamma-soluble NSF attachment protein                                                                         | Q9HBI0 PARVG_HUMAN  |              |              |      | 0,47         | 0,57         | 0,50         |              |              |               |
| Ganglioside GM2 activator precursor                                                                          | Q99747 SNAG_HUMAN   | 0,00<br>0,96 | 0,00<br>0,97 | 0,00 |              |              |              |              |              |               |
| GatC-like protein                                                                                            | P17900 SAP3_HUMAN   | 0,85<br>0,93 | 0,64<br>0,76 | 0,56 | 0,00         | 0,00         | 0,00         |              |              |               |
| GBAS protein (Fragment)                                                                                      | P17900 SAP3_HUMAN   | 0,85<br>0,93 | 0,64<br>0,76 | 0,56 | 1,91<br>1,33 | 0,77<br>0,62 | 0,98<br>0,82 |              |              |               |
| GBP2 protein                                                                                                 | O43716 GATCL_HUMAN  | 0,82<br>0,86 | 0,91<br>0,81 |      |              |              |              |              |              |               |
| GCN1-like protein 1                                                                                          | Q53X96 Q53X96_HUMAN | 0,86<br>0,91 | 0,81<br>0,93 | 0,72 |              |              |              | 1,03         | 2,34         | 1,59          |
| GDH/6PGL endoplasmic bifunctional protein precursor                                                          | Q6IAU2 Q6IAU2_HUMAN |              |              |      | 0,90<br>0,00 | 1,04<br>0,00 | 0,86<br>0,00 |              |              |               |
| GDI2 protein                                                                                                 | Q92616 GCN1L_HUMAN  | 0,85         | 0,83         | 0,93 |              |              |              |              |              |               |
| GDP-fucose protein O-fucosyltransferase 1 precursor                                                          | Q95479 G6PE_HUMAN   | 0,79<br>0,83 | 0,97<br>0,92 | 0,89 |              |              |              |              |              |               |
| GDP-L-fucose synthetase                                                                                      | Q6IAT1 Q6IAT1_HUMAN |              |              |      | 0,87<br>0,93 | 1,04<br>0,94 | 0,89<br>0,97 |              |              |               |
| Gelsolin                                                                                                     | Q9H488 OFUT1_HUMAN  | 1,06<br>0,81 | 1,11<br>1,11 | 1,06 |              |              |              |              |              |               |
| GEM-interacting protein                                                                                      | Q13630 FCL_HUMAN    |              |              |      | 0,92         | 1,07         | 0,65         |              |              |               |
| Gene expressed in odontoblast protein                                                                        | P06396 GELS_HUMAN   | 1,78<br>1,20 | 3,43<br>1,97 | 7,23 | 0,82<br>0,94 | 0,97<br>1,17 | 0,95<br>1,15 | 1,02<br>0,63 | 2,69<br>1,68 | 2,35<br>1,60  |
| GH3 domain-containing protein precursor                                                                      | Q9P107 GMIP_HUMAN   |              |              |      | 0,00         | 0,00         | 0,00         |              |              |               |
| Girdin                                                                                                       | Q6EVH4 Q6EVH4_HUMAN | 1,13         | 1,00         |      |              |              |              |              |              |               |
| Glia maturation factor gamma                                                                                 | Q8N2G8 GHDC_HUMAN   | 1,42<br>0,97 | 1,33<br>1,02 | 1,39 |              |              |              |              |              |               |
| Glucose-6-phosphate 1-dehydrogenase                                                                          | Q3V6T2 GRDN_HUMAN   |              |              |      | 1,05         | 1,09         | 1,16         |              |              |               |
| Glucose-6-phosphate 1-dehydrogenase                                                                          | Q8TDZ6 Q8TDZ6_HUMAN |              |              |      | 0,85<br>0,72 | 0,94<br>0,89 | 0,79<br>0,71 |              |              |               |
| Glucose-6-phosphate 1-dehydrogenase (Fragment)                                                               | P11413 G6PD_HUMAN   | 1,20         | 2,24         | 5,21 | 0,92<br>0,94 | 1,07<br>1,36 | 1,00<br>1,10 |              |              |               |
| Glucose-6-phosphate isomerase                                                                                | A8K8D9 A8K8D9_HUMAN |              |              |      |              |              |              |              |              |               |
| Glucosidase 2 subunit beta precursor                                                                         | Q2VF42 Q2VF42_HUMAN |              |              |      |              |              |              | 0,81         | 4,95         | 10,79         |
| Glucosidase I                                                                                                | P06744 G6PI_HUMAN   |              |              |      | 0,87<br>0,88 | 0,96<br>0,95 | 0,96<br>0,85 |              |              |               |
| Glucosylceramidase precursor                                                                                 | P14314 GLU2B_HUMAN  | 1,01<br>0,97 | 1,12<br>1,14 | 1,08 | 1,92<br>1,75 | 1,41<br>1,15 | 2,41<br>1,67 | 0,81<br>0,00 | 2,48<br>0,00 | 4,20<br>0,00  |
|                                                                                                              | Q58F09 Q58F09_HUMAN | 0,94         | 1,05         | 0,90 |              |              |              | 1,09<br>0,67 | 2,03<br>2,72 | 4,03<br>3,48  |
|                                                                                                              | P04062 GLCM_HUMAN   | 1,00         | 1,06         | 0,80 |              |              |              |              |              |               |

|                                                                            |                     |      |      |      |      |      |      |      |      |
|----------------------------------------------------------------------------|---------------------|------|------|------|------|------|------|------|------|
|                                                                            |                     | 0,94 | 1,02 |      | 2,76 | 1,01 | 1,20 |      |      |
| Glutamate dehydrogenase 1, mitochondrial precursor                         | P00367 DHE3_HUMAN   | 0,98 | 0,98 |      |      |      |      |      |      |
| Glutamate dehydrogenase 1 variant (Fragment)                               | Q53GW3 Q53GW3_HUMAN | 0,90 | 0,87 | 0,77 | 1,99 | 1,51 | 2,57 | 1,37 | 3,41 |
| Glutaminase kidney isoform, mitochondrial precursor                        | O94925 GLSK_HUMAN   | 0,81 | 0,83 | 0,68 | 2,43 | 1,49 | 2,20 | 0,56 | 3,11 |
| Glutamine synthetase                                                       | P15104 GLNA_HUMAN   | 0,93 | 0,95 |      |      |      |      |      |      |
| Glutaminyl-tRNA synthetase variant (Fragment)                              | Q53HS0 Q53HS0_HUMAN | 1,08 | 1,36 | 1,56 | 0,82 | 0,98 | 0,98 |      |      |
| Glutaredoxin-1                                                             | P35754 GLRX1_HUMAN  |      |      |      | 0,89 | 0,86 | 0,97 |      |      |
| Glutaredoxin-related protein 5                                             | Q86SX6 GLRX5_HUMAN  | 1,10 | 1,25 |      | 0,90 | 0,97 | 0,88 |      |      |
| Glutaryl-CoA dehydrogenase, mitochondrial precursor                        | Q92947 GCDH_HUMAN   | 0,88 | 0,83 | 0,61 |      |      |      |      |      |
| Glutathione peroxidase                                                     | Q6NSD4 Q6NSD4_HUMAN | 0,93 | 0,88 |      |      |      |      |      |      |
| Glutathione peroxidase 1                                                   | P07203 GPX1_HUMAN   | 0,92 | 0,97 | 0,87 |      |      |      |      |      |
| Glutathione reductase, mitochondrial precursor                             | P00390 GSHR_HUMAN   | 1,02 | 1,02 |      | 0,00 | 0,00 | 0,00 |      |      |
| Glutathione S-transferase kappa 1                                          | Q9Y2Q3 GSTK1_HUMAN  | 1,05 | 1,26 | 1,45 |      |      |      |      |      |
| Glutathione S-transferase P                                                | P09211 GSTP1_HUMAN  | 0,89 | 0,92 |      |      |      |      |      |      |
| Glutathione synthetase                                                     | P48637 GSHB_HUMAN   | 0,92 | 1,20 | 1,24 | 0,95 | 1,32 | 1,22 |      |      |
| Glutathione transferase omega-1                                            | P78417 GSTO1_HUMAN  | 0,97 | 0,99 |      | 1,01 | 1,13 | 1,22 |      |      |
| Glyceraldehyde 3-phosphate dehydrogenase (Fragment)                        | Q53X65 Q53X65_HUMAN | 1,85 | 1,25 | 1,30 | 1,64 | 4,39 | 2,99 | 1,42 | 3,45 |
| Glycerol kinase                                                            | Q61Q27 Q61Q27_HUMAN | 1,02 | 0,92 |      | 0,82 | 0,94 | 0,84 |      |      |
| Glycerol-3-phosphate dehydrogenase 1-like protein                          | Q8N335 GPD1L_HUMAN  | 0,70 | 0,87 | 0,89 | 1,10 | 0,91 | 1,01 |      |      |
| Glycerol-3-phosphate dehydrogenase, mitochondrial precursor                | P43304 GPDH_HUMAN   | 0,78 | 0,74 | 0,60 | 0,79 | 0,95 | 0,86 |      |      |
| Glyceronephosphate O-acyltransferase variant (Fragment)                    | Q59EC9 Q59EC9_HUMAN | 0,00 | 0,00 | 0,00 | 0,71 | 0,84 | 0,67 |      |      |
| Glycerophosphodiester phosphodiesterase 1                                  | Q9NZC3 GDE1_HUMAN   | 1,10 | 2,07 | 5,30 | 0,87 | 1,01 | 0,99 | 1,07 | 2,22 |
| Glycogen phosphorylase, liver form                                         | P06737 PYGL_HUMAN   | 1,23 | 1,65 |      | 0,98 | 1,09 | 1,10 | 0,73 | 1,71 |
| Glycolipid transfer protein                                                | Q9NZD2 GLTP_HUMAN   | 0,97 | 1,14 | 1,13 |      |      |      |      |      |
| Glycosyltransferase 25 family member 1 precursor                           | Q8NBJ5 GT251_HUMAN  | 1,01 | 1,02 |      |      |      |      |      |      |
| Glycyl-tRNA synthetase                                                     | P41250 SYG_HUMAN    | 1,15 | 1,13 |      |      |      |      |      |      |
| Glypican-4 precursor                                                       | O75487 GPC4_HUMAN   | 0,96 | 1,03 |      |      |      |      |      |      |
| GNAS complex locus                                                         | Q5FWY2 Q5FWY2_HUMAN | 0,99 | 1,11 |      |      |      |      |      |      |
| GNB1 protein (Fragment)                                                    | Q1RMY8 Q1RMY8_HUMAN | 1,07 | 1,08 | 1,23 | 0,86 | 0,92 | 0,88 |      |      |
| GNB2 protein                                                               | Q6FHM2 Q6FHM2_HUMAN | 0,94 | 1,06 |      | 0,80 | 0,94 | 0,96 |      |      |
| GNB2L1 protein (Fragment)                                                  | Q6FH47 Q6FH47_HUMAN |      |      |      | 0,92 | 0,94 | 0,79 |      |      |
| Golgi apparatus protein 1                                                  | Q6P9D1 Q6P9D1_HUMAN | 1,04 | 1,08 | 1,00 |      |      |      | 1,25 | 2,21 |
| Golgi apparatus protein 1 precursor                                        | Q92896 GSLG1_HUMAN  | 0,97 | 1,12 |      | 2,45 | 1,28 | 1,42 | 0,61 | 1,75 |
| Golgi autoantigen, golgin subfamily a, 2 (Fragment)                        | Q5SYX5 Q5SYX5_HUMAN | 1,03 | 1,06 | 1,16 | 0,83 | 0,89 | 0,94 |      |      |
| Golgi integral membrane protein 4                                          | O00461 GOLI4_HUMAN  | 0,99 | 0,99 |      | 0,96 | 1,04 | 1,07 |      |      |
| Golgi membrane protein 1                                                   | Q8NB44 GOLM1_HUMAN  | 0,81 | 0,75 |      |      |      |      |      |      |
| Golgi phosphoprotein 3                                                     | Q9H4A6 GOLP3_HUMAN  |      |      |      |      |      |      |      |      |
| Golgi reassembly-stacking protein 2                                        | Q9H8Y8 GORS2_HUMAN  |      |      |      |      |      |      |      |      |
| Golgi resident protein GCP60                                               | Q9H3P7 GCP60_HUMAN  |      |      |      |      |      |      |      |      |
| Golgi SNAP receptor complex member 1                                       | O95249 GOSR1_HUMAN  |      |      |      |      |      |      |      |      |
| Golgi-associated plant pathogenesis-related protein 1                      | Q9H4G4 GAPR1_HUMAN  | 1,19 | 1,00 |      |      |      |      |      |      |
| Golgin subfamily A member 5                                                | Q8TBA6 GOGA5_HUMAN  | 1,15 | 0,82 | 0,82 | 1,67 | 0,85 | 0,84 | 1,42 | 0,84 |
| Golgin subfamily B member 1                                                | Q14789 GOGB1_HUMAN  | 0,98 | 0,99 |      | 1,35 | 0,89 | 0,77 |      |      |
| Golgi-specific brefeldin A-resistance guanine nucleotide exchange factor 1 | Q92538 GBF1_HUMAN   | 1,08 | 0,64 | 0,70 |      |      |      |      |      |
| GPI transamidase component PIG-S                                           | Q96S52 PIGS_HUMAN   | 1,29 | 0,97 | 1,29 |      |      |      |      |      |
| GPI transamidase component PIG-T precursor                                 | Q969N2 PIGT_HUMAN   | 0,83 | 0,95 | 0,93 |      |      |      | 1,79 | 2,36 |
| GPI-anchor transamidase precursor                                          | Q92643 GPI8_HUMAN   | 1,04 | 0,96 |      |      |      |      | 1,93 | 1,50 |
| G-protein coupled receptor 98 precursor                                    | Q8WXG9 GPR98_HUMAN  | 1,26 | 1,06 |      |      |      |      |      |      |
| Grancalcin                                                                 | P28676 GRAN_HUMAN   |      |      |      |      |      |      |      |      |
| Graves disease carrier protein                                             | P16260 GDC_HUMAN    |      |      |      |      |      |      |      |      |
| GRB2 protein (Fragment)                                                    | Q61CN0 Q61CN0_HUMAN |      |      |      | 0,86 | 0,86 | 0,78 |      |      |
| GRHPR protein (Fragment)                                                   | Q5M7Z5 Q5M7Z5_HUMAN |      |      |      | 0,71 | 0,86 | 0,71 |      |      |
| G-rich sequence factor 1                                                   | Q12849 GRSF1_HUMAN  | 0,92 | 1,01 |      |      |      |      |      |      |
| GRIP1-associated protein 1                                                 | Q4V328 GRAP1_HUMAN  | 1,01 | 0,68 | 0,55 |      |      |      |      |      |
| Growth arrest and DNA-damage-inducible proteins-interacting protein 1      | Q8TAE8 G45IP_HUMAN  | 0,94 | 0,92 |      | 0,90 | 0,83 | 0,65 |      |      |
| Growth hormone inducible transmembrane protein                             | Q5VT94 Q5VT94_HUMAN |      |      |      |      |      |      |      |      |
| Growth-inhibiting protein 17                                               | Q2TU34 Q2TU34_HUMAN | 1,21 | 1,68 | 1,69 | 0,86 | 0,94 | 0,94 | 1,64 | 3,46 |
| GrpE protein homolog 1, mitochondrial precursor                            | Q9HAV7 GRPE1_HUMAN  | 1,62 | 1,79 |      | 0,83 | 0,91 | 0,88 | 0,80 | 3,72 |
| GSPT1 protein                                                              | Q96GF2 Q96GF2_HUMAN | 0,81 | 0,84 | 0,60 | 1,69 | 1,44 | 1,90 |      |      |
| GSTK1 protein                                                              | Q6P4H0 Q6P4H0_HUMAN | 0,98 | 1,05 |      |      |      |      |      |      |
|                                                                            |                     | 0,93 | 0,94 | 0,68 |      |      |      |      |      |

|                                                                                              |                     |                             |                             |              |                            |                             |                             |                                                                                        |
|----------------------------------------------------------------------------------------------|---------------------|-----------------------------|-----------------------------|--------------|----------------------------|-----------------------------|-----------------------------|----------------------------------------------------------------------------------------|
| GSTK1 protein (Fragment)                                                                     | Q2NLC8 Q2NLC8_HUMAN |                             |                             |              | <b>1,53</b>                | 1,23                        | <b>1,16</b>                 |                                                                                        |
| GSTZ1 protein                                                                                | Q6IB17 Q6IB17_HUMAN | 0,84<br>1,10                | 0,90<br>0,98                | 0,89         |                            |                             |                             |                                                                                        |
| GTF2F1 protein                                                                               | Q6IBK5 Q6IBK5_HUMAN |                             |                             |              | 0,94                       | 0,76                        | 0,65                        |                                                                                        |
| GTP:AMP phosphotransferase mitochondrial                                                     | Q9UIJ7 KAD3_HUMAN   | <b>0,84</b><br>1,05         | <b>0,75</b><br><b>0,88</b>  | <b>0,52</b>  | 1,63                       | 1,23                        | 1,39                        |                                                                                        |
| GTPase activating protein (SH3 domain) binding protein 1                                     | Q32P45 Q32P45_HUMAN |                             |                             |              |                            |                             |                             | 1,03 0,62 0,34                                                                         |
| GTPase IMAP family member 1                                                                  | Q8WWP7 GIMA1_HUMAN  | 0,93<br>0,95                | 1,03<br><b>1,18</b>         | 0,91         |                            |                             |                             |                                                                                        |
| GTPase IMAP family member 4                                                                  | Q9NUV9 GIMA4_HUMAN  |                             |                             |              | <b>0,74</b><br>0,00        | 0,95<br>0,00                | 0,94<br>0,00                |                                                                                        |
| GTPase IMAP family member 8                                                                  | Q8ND71 Q8ND71_HUMAN |                             |                             |              |                            |                             |                             | 0,00 0,00 0,00                                                                         |
| GTPase KRas precursor                                                                        | P01116 RASK_HUMAN   | 1,03                        | 1,06                        |              |                            |                             |                             |                                                                                        |
| GTP-binding nuclear protein Ran                                                              | P62826 RAN_HUMAN    |                             |                             |              | <b>0,80</b><br>0,94        | 1,09<br>1,02                | 0,96<br>1,04                |                                                                                        |
| GTP-binding protein era homolog                                                              | O75616 ERAL_HUMAN   | 1,03<br>0,86                | 0,63<br><b>0,86</b>         | 0,69         |                            |                             |                             |                                                                                        |
| GTP-binding protein SAR1a                                                                    | Q9NR31 SAR1A_HUMAN  | 0,60<br>1,06                | 1,62<br><b>1,57</b>         | <b>3,51</b>  | <b>0,79</b><br><b>0,81</b> | 0,94<br>1,16                | <b>0,68</b><br>0,83         |                                                                                        |
| GTP-binding protein SAR1b                                                                    | Q9Y6B6 SAR1B_HUMAN  | 1,22                        | <b>1,27</b>                 | 1,76         | 0,82                       | 0,80                        | 0,82                        |                                                                                        |
| Guanine nucleotide binding protein (G protein), alpha inhibiting activity polypeptide 3      | Q5TZX1 Q5TZX1_HUMAN | 1,04<br>1,19                | 1,04<br>1,16                | 1,02         |                            |                             |                             |                                                                                        |
| Guanine nucleotide binding protein (G protein), beta polypeptide 2-like 1 variant (Fragment) | Q53HU2 Q53HU2_HUMAN |                             |                             |              | <b>1,77</b>                | <b>1,29</b>                 | <b>2,20</b>                 |                                                                                        |
| Guanine nucleotide binding protein (G protein), q polypeptide                                | Q6NT27 Q6NT27_HUMAN | 1,19                        | 1,16                        |              |                            |                             |                             |                                                                                        |
| Guanine nucleotide-binding protein alpha-12 subunit                                          | Q03113 GNA12_HUMAN  |                             |                             |              |                            |                             |                             |                                                                                        |
| Guanine nucleotide-binding protein alpha-13 subunit                                          | Q14344 GNA13_HUMAN  | 1,08<br><b>1,25</b><br>1,08 | 1,05<br><b>0,86</b><br>0,94 | 1,09         | 1,91                       | 0,94                        | 1,25                        |                                                                                        |
| Guanine nucleotide-binding protein G(i), alpha-1 subunit                                     | P63096 GNAI1_HUMAN  |                             |                             |              | <b>1,47</b>                | <b>0,89</b>                 | 1,05                        |                                                                                        |
| Guanine nucleotide-binding protein G(i), alpha-2 subunit                                     | P04899 GNAI2_HUMAN  | 1,62<br>1,00                | 1,33<br>0,96                | 1,60         | 0,00                       | 0,00                        | 0,00                        |                                                                                        |
| Guanine nucleotide-binding protein G(i)/G(S)/G(O) subunit gamma-10 precursor                 | P50151 GBG10_HUMAN  |                             |                             |              |                            |                             |                             | 0,00 0,00 0,00                                                                         |
| Guanine nucleotide-binding protein G(i)/G(S)/G(O) subunit gamma-5 precursor                  | P63218 GBG5_HUMAN   | 1,11<br><b>1,30</b><br>0,99 | 1,00<br>1,23<br><b>0,80</b> | 1,13         | <b>1,98</b><br><b>1,58</b> | 1,03<br>0,89                | <b>1,42</b><br>0,99         | <b>1,58</b><br><b>1,83</b><br><b>2,01</b><br><b>1,43</b><br><b>2,52</b><br><b>2,82</b> |
| Guanine nucleotide-binding protein G(i)/G(S)/G(T) subunit beta-1                             | P62873 GBB1_HUMAN   | 1,33<br>1,06                | 1,08<br>1,12                | <b>1,10</b>  |                            |                             |                             | <b>1,72</b><br>0,55<br><b>1,24</b><br>1,53                                             |
| Guanine nucleotide-binding protein G(s) subunit alpha isoforms XLas                          | Q5JWF2 GNAS1_HUMAN  |                             |                             |              |                            |                             |                             | 1,40 0,84 1,47                                                                         |
| GYG1 protein (Fragment)                                                                      | Q8N5Y3 Q8N5Y3_HUMAN |                             |                             |              | 0,00                       | 0,00                        | 0,00                        |                                                                                        |
| H/ACA ribonucleoprotein complex subunit 1                                                    | Q9NY12 NOLA1_HUMAN  |                             |                             |              |                            |                             |                             | <b>1,20</b><br>1,13<br><b>0,82</b><br>0,83<br><b>0,56</b><br><b>0,73</b>               |
| H/ACA ribonucleoprotein complex subunit 2                                                    | Q9NX24 NOLA2_HUMAN  |                             |                             |              |                            |                             |                             | 0,81<br>0,71<br><b>0,56</b><br>1,36<br><b>0,46</b><br>0,66                             |
| H/ACA ribonucleoprotein complex subunit 3                                                    | Q9NPE3 NOLA3_HUMAN  |                             |                             |              |                            |                             |                             | <b>0,85</b><br>1,11<br>0,93<br><b>0,53</b><br><b>0,51</b><br><b>0,60</b>               |
| H2A histone family member J                                                                  | Q9NV63 Q9NV63_HUMAN |                             |                             |              |                            |                             |                             | 0,00 0,00 0,00                                                                         |
| H2A histone family, member J                                                                 | Q9BTM1 Q9BTM1_HUMAN |                             |                             |              |                            |                             |                             | 0,00 0,00 0,00                                                                         |
| HASCT1                                                                                       | Q9P2X2 Q9P2X2_HUMAN | 1,33                        | <b>1,49</b>                 |              |                            |                             |                             |                                                                                        |
| HBeAg-binding protein 2 binding protein A                                                    | Q1HDL3 Q1HDL3_HUMAN | 0,99                        | 0,91                        |              |                            |                             |                             |                                                                                        |
| HBS1-like protein                                                                            | Q9Y450 HBS1L_HUMAN  |                             |                             |              | 0,61                       | 0,72                        | 0,52                        |                                                                                        |
| HCLS1 protein                                                                                | Q6IBK9 Q6IBK9_HUMAN | 1,10<br>1,72                | 1,03<br>1,87                | 1,61         | 0,91<br>0,66               | <b>0,85</b><br>0,68         | <b>0,71</b><br>0,59         | <b>0,67</b><br><b>1,61</b><br><b>0,15</b><br><b>0,38</b><br><b>0,11</b><br><b>0,37</b> |
| HCLS1-associated protein X-1                                                                 | O00165 HAX1_HUMAN   | 0,88                        | 0,84                        |              |                            |                             |                             |                                                                                        |
| Hcp beta-lactamase-like protein C1orf163                                                     | Q96BR5 CA163_HUMAN  | 0,69<br>0,98                | 0,44<br>0,94                | <b>0,38</b>  |                            |                             |                             |                                                                                        |
| Heat shock 70 kDa protein 1                                                                  | P08107 HSP71_HUMAN  | 1,01                        | 1,14                        | <b>2,41</b>  | 0,94<br>0,96               | <b>1,11</b><br><b>1,15</b>  | 1,12<br>0,92                | <b>1,53</b><br>0,91<br>1,04<br>1,14<br>1,04<br>0,96                                    |
| Heat shock 70kDa protein 1A variant (Fragment)                                               | Q59EJ3 Q59EJ3_HUMAN | <b>1,19</b>                 | 1,11                        |              |                            |                             |                             |                                                                                        |
| Heat shock 70kDa protein 4                                                                   | Q2TAL4 Q2TAL4_HUMAN |                             |                             |              | <b>0,84</b><br>1,04        | 0,98<br>1,14                | 1,05<br>1,15                |                                                                                        |
| Heat shock 70kDa protein 9B                                                                  | Q1HB43 Q1HB43_HUMAN | <b>0,90</b><br>0,98         | <b>0,81</b><br>0,99         | <b>0,69</b>  | <b>1,71</b>                | <b>1,41</b>                 | <b>1,83</b>                 | <b>0,72</b><br><b>2,24</b><br><b>2,99</b>                                              |
| Heat shock 70kDa protein 9B variant (Fragment)                                               | Q53H23 Q53H23_HUMAN |                             |                             |              |                            |                             |                             | 0,91<br><b>2,35</b><br><b>4,41</b>                                                     |
| Heat shock cognate 71 kDa protein                                                            | P11142 HSP7C_HUMAN  | 0,89<br>1,04                | 0,98<br>1,03                | <b>1,62</b>  | 0,94<br>1,00               | 1,09<br><b>1,14</b>         | 0,98<br>1,02                | <b>1,66</b><br>1,05<br><b>0,77</b><br><b>0,87</b><br><b>0,83</b><br><b>0,71</b>        |
| Heat shock protein 105 kDa                                                                   | Q92598 HS105_HUMAN  |                             |                             |              | 1,07<br>0,97               | 1,23<br>1,13                | 1,21<br>0,94                |                                                                                        |
| Heat shock protein 75 kDa, mitochondrial precursor                                           | Q12931 TRAP1_HUMAN  | 1,00                        | 1,02                        |              |                            |                             |                             |                                                                                        |
| Heat shock protein 90Ad                                                                      | Q58FG1 Q58FG1_HUMAN |                             |                             |              | 0,00                       | 0,00                        | 0,00                        |                                                                                        |
| Heat shock protein beta-1                                                                    | P04792 HSPB1_HUMAN  | 1,87<br>1,17                | <b>5,16</b><br>4,11         | <b>13,91</b> | 0,83                       | <b>0,52</b>                 | <b>0,41</b>                 | 3,43<br><b>9,73</b><br><b>5,05</b>                                                     |
| Heat shock protein HSP 90-alpha                                                              | P07900 HS90A_HUMAN  | 1,12<br>1,14                | <b>1,45</b><br>1,48         | <b>1,85</b>  | 0,92<br>0,93               | 0,97<br>0,97                | <b>1,12</b><br>1,02         | 1,61<br>2,19<br>4,68                                                                   |
| Heat shock protein HSP 90-beta                                                               | P08238 HS90B_HUMAN  | <b>1,33</b><br>1,12         | <b>2,35</b><br><b>1,68</b>  | <b>5,64</b>  | <b>0,92</b><br>0,94        | 1,04<br>1,00                | 1,05<br>1,05                | 1,88<br>2,85<br>4,71                                                                   |
| Hemagglutinin precursor                                                                      | P19106 HEMA_I72A2   | <b>3,00</b><br><b>1,86</b>  | <b>7,29</b><br><b>7,58</b>  | <b>7,18</b>  | <b>1,87</b><br>2,18        | <b>7,29</b><br>5,35         | <b>9,31</b><br>7,90         | <b>6,49</b><br><b>6,34</b><br><b>4,01</b><br><b>4,87</b><br><b>5,97</b><br><b>5,60</b> |
| Hematological and neurological expressed 1-like protein                                      | Q9H910 HN1L_HUMAN   |                             |                             |              | 0,98<br>1,16               | 0,77<br>0,92                | 0,66<br>0,78                |                                                                                        |
| Hematological and neurological expressed 1 protein                                           | Q9UK76 HN1_HUMAN    |                             |                             |              |                            |                             |                             |                                                                                        |
| Heme oxygenase (Decycling) 1                                                                 | Q96DI8 Q96DI8_HUMAN | 1,30                        | 0,95                        |              | 0,00                       | 0,00                        | 0,00                        | 0,00 0,00 0,00                                                                         |
| Heme oxygenase (Decycling) 2 variant (Fragment)                                              | Q53HF1 Q53HF1_HUMAN |                             |                             |              | 1,58<br>0,95<br>1,00       | 0,94<br>1,05<br>1,16        | 0,79<br>1,05<br>0,96        |                                                                                        |
| Heme-binding protein 1                                                                       | Q9NRV9 HEBP1_HUMAN  | 1,00                        | <b>0,84</b>                 |              |                            |                             |                             |                                                                                        |
| Hemopexin precursor                                                                          | P02790 HEMO_HUMAN   | 1,79                        | 1,79                        | <b>3,85</b>  |                            |                             |                             |                                                                                        |
| Heparan sulfate 2-O-sulfotransferase 1                                                       | Q7LGA3 HS2ST_HUMAN  | 1,10<br>1,03                | <b>0,55</b><br><b>0,83</b>  | 0,53         |                            |                             |                             | 1,33<br>1,76<br>1,11<br>1,36<br>1,48<br>1,96                                           |
| Heparin-binding protein HBp15                                                                | Q7Z4W8 Q7Z4W8_HUMAN | 0,92                        | 1,16                        | 1,37         | 1,24<br>0,97<br>0,66       | 0,79<br>0,79<br><b>0,85</b> | 1,09<br>0,89<br><b>0,75</b> | 1,18<br>0,00<br><b>2,06</b><br><b>2,30</b>                                             |
| Hepatoma-derived growth factor                                                               | P51858 HDGF_HUMAN   |                             |                             |              | 0,92<br>0,66               | 1,17<br><b>0,85</b>         | 0,94<br><b>0,75</b>         | 0,00<br>1,06<br><b>1,56</b><br>1,39                                                    |
| Hepatoma-derived growth factor-related protein 2                                             | Q7Z4V5 HDGR2_HUMAN  |                             |                             |              | 0,00                       | 0,00                        | 0,00                        | <b>1,36</b><br><b>1,72</b><br><b>1,59</b>                                              |
| Hepatopoietin                                                                                | Q9UK40 Q9UK40_HUMAN |                             |                             |              |                            |                             |                             |                                                                                        |

|                                                                         |                     |      |      |      |      |      |      |      |      |      |
|-------------------------------------------------------------------------|---------------------|------|------|------|------|------|------|------|------|------|
| Hepatopoietin PCn127                                                    | Q1AHP8 Q1AHP8_HUMAN | 1,06 | 0,70 |      |      |      | 1,06 | 3,19 | 2,69 |      |
| Heterochromatin protein 1, binding protein 3                            | Q5SSJ5 Q5SSJ5_HUMAN |      |      |      | 0,79 | 1,03 | 0,80 | 1,07 | 0,46 | 0,44 |
| Heterogeneous nuclear ribonucleoprotein A1                              | P09651 ROA1_HUMAN   | 0,57 | 1,23 | 2,02 | 0,75 | 0,71 | 0,43 | 0,79 | 0,69 | 0,66 |
| Heterogeneous nuclear ribonucleoprotein A3                              | P51991 ROA3_HUMAN   | 0,95 | 1,53 |      | 1,29 | 2,42 | 2,02 | 0,80 | 0,24 | 0,14 |
| Heterogeneous nuclear ribonucleoprotein AB isoform a variant (Fragment) | Q53F64 Q53F64_HUMAN | 0,80 | 1,58 | 2,33 | 0,89 | 1,58 | 1,49 | 0,97 | 0,28 | 0,29 |
| Heterogeneous nuclear ribonucleoprotein C-like 1                        | O60812 HNRCL_HUMAN  | 0,69 | 1,46 |      | 0,93 | 0,32 |      | 0,93 | 0,32 | 0,19 |
| Heterogeneous nuclear ribonucleoprotein D0                              | Q14103 HNRPD_HUMAN  |      |      |      | 0,87 | 0,37 |      | 0,87 | 0,37 | 0,27 |
| Heterogeneous nuclear ribonucleoprotein D-like                          | O14979 HNRDL_HUMAN  |      |      |      | 1,25 | 2,35 | 1,95 | 0,99 | 0,28 | 0,21 |
| Heterogeneous nuclear ribonucleoprotein F                               | P52597 HNRPF_HUMAN  |      |      |      | 0,94 | 1,76 | 1,31 | 1,05 | 0,36 | 0,33 |
| Heterogeneous nuclear ribonucleoprotein G                               | P38159 HNRPG_HUMAN  |      |      |      |      |      |      | 0,00 | 0,00 | 0,00 |
| Heterogeneous nuclear ribonucleoprotein H                               | P31943 HNRH1_HUMAN  | 1,20 | 3,45 | 5,85 | 0,93 | 0,39 |      | 0,93 | 0,39 | 0,33 |
| Heterogeneous nuclear ribonucleoprotein H2                              | P55795 HNRH2_HUMAN  | 1,00 | 2,57 |      | 0,94 | 1,45 | 1,01 | 0,94 | 0,50 | 0,33 |
| Heterogeneous nuclear ribonucleoprotein H3 isoform a variant (Fragment) | Q53F48 Q53F48_HUMAN |      |      |      |      |      |      | 0,93 | 0,28 | 0,20 |
| Heterogeneous nuclear ribonucleoprotein K                               | P61978 HNRPK_HUMAN  | 1,38 | 3,24 | 5,29 | 1,26 | 1,53 | 1,09 | 0,77 | 0,35 | 0,15 |
| Heterogeneous nuclear ribonucleoprotein K transcript variant            | Q5EC54 Q5EC54_HUMAN | 1,04 | 1,67 |      | 0,96 | 1,15 | 0,92 | 0,96 | 0,45 | 0,36 |
| Heterogeneous nuclear ribonucleoprotein M                               | P52272 HNRPM_HUMAN  |      |      |      | 1,22 | 1,33 | 0,93 | 0,92 | 0,45 | 0,35 |
| Heterogeneous nuclear ribonucleoprotein Q                               | O60506 HNRPQ_HUMAN  | 0,76 | 0,86 | 1,49 | 1,32 | 1,54 | 1,09 | 0,91 | 0,37 | 0,30 |
| Heterogeneous nuclear ribonucleoprotein U                               | Q00839 HNRPU_HUMAN  | 0,90 | 1,40 | 2,57 | 1,22 | 1,33 | 0,93 | 0,84 | 0,46 | 0,45 |
| Heterogeneous nuclear ribonucleoprotein U-like protein 2                | Q1KMD3 HNRL2_HUMAN  |      |      |      | 1,23 | 0,21 | 0,15 | 1,23 | 0,21 | 0,15 |
| Heterogeneous nuclear ribonucleoproteins A2/B1                          | P22626 ROA2_HUMAN   | 0,79 | 1,67 | 3,41 | 0,84 | 0,34 | 0,25 | 0,88 | 0,31 | 0,32 |
| Heterogeneous nuclear ribonucleoproteins C1/C2                          | P07910 HNRPC_HUMAN  | 0,85 | 1,77 |      | 1,48 | 2,96 | 1,86 | 0,95 | 0,24 | 0,12 |
| HEXA protein (Fragment)                                                 | Q9BVJ8 Q9BVJ8_HUMAN | 0,87 | 1,40 | 2,08 | 1,19 | 2,87 | 1,80 | 1,04 | 0,32 | 0,26 |
| Hexokinase 1 isoform HKI variant (Fragment)                             | Q59FD4 Q59FD4_HUMAN | 0,87 | 1,40 |      | 1,14 | 4,87 | 2,97 | 0,57 | 0,25 | 0,14 |
| Hexokinase 3                                                            | Q8N1E7 Q8N1E7_HUMAN |      |      |      | 1,80 | 4,62 | 2,70 | 0,73 | 0,39 | 0,32 |
| Hexokinase 3 variant (Fragment)                                         | Q59H08 Q59H08_HUMAN | 0,95 | 0,88 | 1,05 | 0,74 | 0,95 | 0,84 |      |      |      |
| Hexokinase-2                                                            | P52789 HXK2_HUMAN   | 1,06 | 1,23 |      | 0,92 | 1,06 | 1,03 | 1,14 | 1,48 | 4,46 |
| High affinity immunoglobulin epsilon receptor subunit gamma precursor   | P30273 FCERG_HUMAN  | 1,54 | 0,83 | 1,28 | 1,59 | 1,05 | 0,90 | 0,35 | 1,24 | 2,13 |
| High affinity immunoglobulin gamma Fc receptor 1 precursor              | P12314 FCGR1_HUMAN  | 0,00 | 0,00 |      |      |      |      |      |      |      |
| High mobility group AT-hook 1                                           | Q5T6U8 Q5T6U8_HUMAN |      |      |      |      |      |      | 1,19 |      | 0,41 |
| High mobility group AT-hook 1                                           | Q5T6U9 Q5T6U9_HUMAN |      |      |      | 1,10 | 2,62 | 2,06 | 1,01 | 0,41 | 0,40 |
| High mobility group nucleosome-binding domain-containing protein 3      | Q15651 HMGN3_HUMAN  |      |      |      | 1,11 | 3,40 | 4,45 | 0,86 | 0,89 | 0,95 |
| High mobility group nucleosome-binding domain-containing protein 4      | O00479 HMGN4_HUMAN  |      |      |      |      |      |      | 0,87 | 0,30 | 0,27 |
| High mobility group protein B3                                          | O15347 HMGB3_HUMAN  |      |      |      | 0,46 | 2,02 | 2,66 | 1,19 | 0,79 | 0,75 |
| High-mobility group box 1                                               | Q5T7C3 Q5T7C3_HUMAN |      |      |      | 0,97 | 1,62 | 0,53 | 1,15 | 1,42 | 1,81 |
| High-mobility group box 2                                               | Q5U071 Q5U071_HUMAN |      |      |      | 1,01 | 0,53 | 0,45 | 1,20 | 0,96 | 0,94 |
| High-mobility group nucleosome binding domain 1                         | Q3B790 Q3B790_HUMAN | 1,21 | 1,00 |      | 0,76 | 1,04 | 0,74 | 1,04 | 1,57 | 1,40 |
| Hippocalcin                                                             | Q5U068 Q5U068_HUMAN | 0,95 | 0,86 |      | 0,79 | 1,04 | 0,77 | 1,14 | 2,00 | 2,28 |
| HIST1H2AB protein                                                       | P04908 H2A1B_HUMAN  |      |      |      | 0,82 | 0,90 | 0,80 | 1,00 | 1,02 | 1,02 |
| Histamine N-methyltransferase                                           | P50135 HNMT_HUMAN   |      |      |      |      |      |      |      |      |      |
| Histidine triad nucleotide-binding protein 1                            | P49773 HINT1_HUMAN  |      |      |      |      |      |      |      |      |      |

|                                                                      |                     |      |      |      |      |       |       |      |      |       |
|----------------------------------------------------------------------|---------------------|------|------|------|------|-------|-------|------|------|-------|
| Histone H2A type 1-J                                                 | Q99878 H2A1J_HUMAN  | 0,48 | 0,60 |      |      |       |       | 0,00 | 0,00 | 0,00  |
| Histone H2A type 2-A                                                 | Q6F113 H2A2A_HUMAN  |      |      |      |      |       |       | 0,00 | 0,00 | 0,00  |
| Histone H2A type 3                                                   | Q7L7L0 H2A3_HUMAN   |      |      |      |      |       |       | 0,00 | 0,00 | 0,00  |
| Histone H2A,x                                                        | P16104 H2AX_HUMAN   | 1,29 | 0,41 | 1,27 | 0,72 | 9,55  | 15,79 | 0,84 | 0,70 | 0,78  |
| Histone H2A,Z                                                        | P0C0S5 H2AZ_HUMAN   |      |      |      | 1,51 | 5,34  | 8,56  | 1,08 | 1,09 | 1,59  |
| Histone H2AV                                                         | Q71UI9 H2AV_HUMAN   | 1,11 | 0,65 | 1,15 | 0,99 | 2,54  | 2,47  | 1,07 | 1,07 | 1,46  |
| Histone H2B type 1-H                                                 | Q93079 H2B1H_HUMAN  | 0,00 | 0,00 |      | 1,08 | 10,37 | 20,33 | 0,96 | 0,62 | 0,70  |
| Histone H2B type 1-J                                                 | P06899 H2B1J_HUMAN  |      |      |      |      |       |       | 1,11 | 0,93 | 0,93  |
| Histone H2B type 1-L                                                 | Q99880 H2B1L_HUMAN  |      |      |      |      |       |       | 1,19 | 1,27 | 1,54  |
| Histone H2B type 1-M                                                 | Q99879 H2B1M_HUMAN  | 0,57 | 0,45 |      |      |       |       | 1,07 | 1,11 | 1,53  |
| Histone H2B type 2-C                                                 | Q6DN03 H2B2C_HUMAN  | 1,05 | 0,33 | 1,26 | 1,76 | 15,16 | 25,87 |      |      |       |
| Histone H2B type 2-E                                                 | Q16778 H2B2E_HUMAN  | 0,46 | 0,46 |      | 1,93 | 10,31 | 18,48 |      |      |       |
| Histone H2B type 3-B                                                 | Q8N257 H2B3B_HUMAN  |      |      |      |      |       |       | 0,91 | 0,83 | 0,73  |
| Histone H3,1t                                                        | Q16695 H31T_HUMAN   |      |      |      |      |       |       | 0,76 | 0,65 | 0,61  |
| Histone H3,2                                                         | Q71DI3 H32_HUMAN    | 1,04 | 0,41 | 1,19 | 1,41 | 7,25  | 13,78 | 1,29 | 1,00 | 1,38  |
| Histone H3,3                                                         | P84243 H33_HUMAN    | 0,58 | 0,51 |      | 1,06 | 7,55  | 12,26 |      |      |       |
| Histone H4                                                           | P62805 H4_HUMAN     | 1,15 | 0,38 | 1,21 |      |       |       | 0,89 | 0,69 | 0,63  |
| Histone H4-like protein type G                                       | Q99525 H4G_HUMAN    | 0,52 | 0,44 |      | 1,19 | 8,70  | 11,82 | 0,99 | 0,64 | 0,96  |
| Histone-binding protein RBBP4                                        | Q09028 RBBP4_HUMAN  | 0,00 | 0,00 |      | 1,01 | 4,93  | 8,23  | 1,68 | 0,71 | 0,69  |
| HIV Tat-specific factor 1                                            | O43719 HTSF1_HUMAN  |      |      |      |      |       |       | 1,24 | 0,79 | 0,83  |
| HLA B44 (Fragment)                                                   | A9JPE8 A9JPE8_HUMAN |      |      |      | 0,00 | 0,00  | 0,00  | 0,00 | 0,00 | 0,00  |
| HLA class II histocompatibility antigen gamma chain precursor        | P01903 2DRA_HUMAN   |      |      |      | 1,69 | 2,73  | 2,53  | 1,02 | 0,41 | 0,44  |
| HLA class II histocompatibility antigen, DRB1-9 beta chain precursor | Q9TQE0 2B19_HUMAN   | 1,04 | 0,80 | 0,81 | 1,13 | 1,67  | 1,35  | 1,10 | 0,67 | 0,40  |
| HLA-B associated transcript 1                                        | Q5STU3 Q5STU3_HUMAN |      |      |      |      |       |       |      |      |       |
| HLA-B associated transcript 5                                        | B0UXB6 B0UXB6_HUMAN | 0,86 | 1,04 | 1,28 |      |       |       |      |      |       |
| HLA-DMB protein (Fragment)                                           | Q6LEU6 Q6LEU6_HUMAN | 0,89 | 1,14 |      |      |       |       |      |      |       |
| HLA-DPA1 protein                                                     | Q95HB9 Q95HB9_HUMAN | 1,17 | 1,05 | 0,95 | 1,55 | 0,58  | 0,86  | 0,98 | 4,74 | 7,86  |
| HLA-DPB2 protein                                                     | Q8WM95 Q8WM95_HUMAN | 0,00 | 0,00 |      |      |       |       | 2,32 | 3,73 |       |
| HLA-DQA1 protein                                                     | Q6DKG8 Q6DKG8_HUMAN |      |      |      |      |       |       |      |      |       |
| HLA-DRB1*13 variant (Fragment)                                       | Q53IG1 Q53IG1_HUMAN | 0,96 | 0,94 |      |      |       |       |      |      |       |
| HLA-drb5 (Fragment)                                                  | Q29703 Q29703_HUMAN | 1,08 | 0,82 | 0,98 |      |       |       |      |      |       |
| HMGCL protein                                                        | Q6IBC0 Q6IBC0_HUMAN | 1,00 | 0,84 |      |      |       |       |      |      |       |
| HMOX2 protein                                                        | Q6IBP2 Q6IBP2_HUMAN | 0,90 | 0,86 | 0,64 |      |       |       |      |      |       |
| HNRPA0 protein                                                       | Q6IB18 Q6IB18_HUMAN | 0,91 | 0,88 |      |      |       |       |      |      |       |
| HNRPL protein                                                        | Q6NTA2 Q6NTA2_HUMAN | 0,86 | 1,03 | 0,96 | 0,00 | 0,00  | 0,00  |      | 8,37 | 10,96 |
| HNRPR protein                                                        | Q9BV64 Q9BV64_HUMAN | 1,06 | 1,28 |      |      |       |       |      |      |       |
| HNRPU protein                                                        | Q96BA7 Q96BA7_HUMAN |      |      |      |      |       |       | 1,02 | 0,41 | 0,20  |
| HP protein                                                           | Q6NSB4 Q6NSB4_HUMAN | 0,00 | 0,00 | 0,00 | 1,98 | 4,51  | 2,78  | 0,63 | 0,47 | 0,32  |
| HP protein                                                           | Q0VAC5 Q0VAC5_HUMAN | 1,10 | 1,23 |      |      |       |       | 1,05 | 0,27 | 0,24  |
| HPCAL1 protein                                                       | Q6FGY1 Q6FGY1_HUMAN |      |      |      |      |       |       | 0,39 | 0,26 | 0,22  |
| HSD-33                                                               | Q6W898 Q6W898_HUMAN |      |      |      |      |       |       | 0,72 | 0,18 | 0,13  |
| HSPA9 protein (Fragment)                                             | Q8N1C8 Q8N1C8_HUMAN |      |      |      |      |       |       | 0,76 | 0,33 | 0,32  |
| HSPC027                                                              | Q9Y6E3 Q9Y6E3_HUMAN |      |      |      | 1,06 | 2,71  | 1,43  | 1,42 | 0,35 | 0,21  |
| HSPC151                                                              | Q9P012 Q9P012_HUMAN | 0,00 | 0,00 | 0,00 | 1,04 | 2,35  | 1,78  | 0,39 | 0,45 | 0,21  |
| HSPC185                                                              | Q9P0T8 Q9P0T8_HUMAN | 0,00 | 0,00 | 0,00 | 2,06 | 2,03  | 3,70  |      |      |       |
| HSPE1 protein (Fragment)                                             | Q53X54 Q53X54_HUMAN | 1,49 | 1,63 | 3,68 |      |       |       |      |      |       |
| Huntingtin                                                           | P42858 HD_HUMAN     |      |      |      |      |       |       |      |      |       |
| Huntingtin-interacting protein K                                     | Q9NX55 HYPK_HUMAN   |      |      |      | 1,39 | 0,99  | 1,01  |      |      |       |
| Hydrocephalus-inducing protein homolog                               | Q4G0P3 HYDIN_HUMAN  |      |      |      | 0,90 | 0,76  | 0,74  |      |      |       |
| Hydrogen voltage-gated channel 1                                     | Q96D96 Q96D96_HUMAN | 0,75 | 0,52 | 0,60 | 1,38 | 0,61  | 1,20  |      |      |       |
| Hydroxyacyl-coenzyme A dehydrogenase, mitochondrial precursor        | Q16836 HCDH_HUMAN   | 1,03 | 0,87 | 0,63 |      |       |       |      |      |       |
| Hydroxyacylglutathione hydrolase                                     | Q16775 GLO2_HUMAN   | 0,98 | 0,96 |      |      |       |       |      |      |       |
| Hydroxyprostaglandin dehydrogenase 15-(NAD)                          | Q06F08 Q06F08_HUMAN | 1,97 | 1,37 |      |      |       |       |      |      |       |
| Hydroxysteroid 11-beta-dehydrogenase 1-like protein precursor        | Q7Z5J1 DH1L_HUMAN   | 0,82 | 0,75 |      |      |       |       |      |      |       |
| Hydroxysteroid dehydrogenase-like protein 2                          | Q6YN16 HSDL2_HUMAN  | 0,00 | 0,00 |      | 0,00 | 0,00  | 0,00  |      |      |       |
| Hypoxia up-regulated protein 1 precursor                             | Q9Y4L1 HYOU1_HUMAN  | 0,93 | 0,78 | 0,63 |      |       |       |      |      |       |
| HZGJ                                                                 | Q86YQ0 Q86YQ0_HUMAN | 1,03 | 1,01 |      |      |       |       |      |      |       |
| IDH1 protein (Fragment)                                              | Q6FHQ6 Q6FHQ6_HUMAN | 0,98 | 1,09 | 1,08 | 1,83 | 1,06  | 1,49  | 0,90 | 2,79 | 5,71  |
| IKIP2                                                                | Q70UQ0 Q70UQ0_HUMAN | 0,97 | 1,06 |      | 1,93 | 1,33  | 1,91  | 0,84 | 3,46 | 4,86  |

|                                                                       |                     |                            |                            |                            |                            |                            |                            |                     |                            |
|-----------------------------------------------------------------------|---------------------|----------------------------|----------------------------|----------------------------|----------------------------|----------------------------|----------------------------|---------------------|----------------------------|
|                                                                       |                     |                            |                            |                            | 1,33                       | 0,84                       | 0,60                       |                     |                            |
| Immature colon carcinoma transcript 1 protein precursor               | Q14197 ICT1_HUMAN   | 1,01<br>0,98               | 1,00<br>0,99               | 0,94                       |                            |                            |                            |                     |                            |
| Immediate early response 3-interacting protein 1                      | Q9Y5U9 IR3IP_HUMAN  | 0,81<br>1,04               | 1,09<br>0,98               | 0,96                       |                            |                            |                            | 5,40                | 7,97                       |
| IMMT protein                                                          | Q3B7X4 Q3B7X4_HUMAN | <b>0,64</b><br>0,00        | <b>0,80</b><br>0,00        | 0,96                       |                            |                            |                            |                     |                            |
| Immunity-related GTPase family Q protein                              | Q8WZA9 IRGQ_HUMAN   |                            |                            |                            | 0,60                       | 0,67                       | <b>0,55</b>                |                     |                            |
| Immunoglobulin superfamily member 2 precursor                         | Q93033 IGSF2_HUMAN  | 1,01<br>0,96               | 0,95<br><b>0,49</b>        |                            |                            |                            |                            |                     |                            |
| Immunoglobulin superfamily member 6 precursor                         | Q95976 IGSF6_HUMAN  | 0,76<br>0,66               | <b>0,55</b><br>0,66        |                            |                            |                            |                            |                     |                            |
| Immunoglobulin-binding protein 1                                      | P78318 IGBP1_HUMAN  |                            |                            |                            | 0,00<br>0,54               | 0,00<br><b>0,62</b>        | 0,00<br><b>0,42</b>        |                     |                            |
| Induced by contact to basement membrane 1 protein                     | Q5TEJ8 ICB1_HUMAN   |                            |                            |                            | 0,94                       | 0,84                       | 0,60                       |                     |                            |
| Inhibitor-1 of protein phosphatase-2A                                 | Q5J8L8 Q5J8L8_HUMAN |                            |                            |                            | 0,85                       | 0,90                       | <b>0,60</b>                |                     |                            |
| Inner membrane protein COX18, mitochondrial precursor                 | Q8N8Q8 COX18_HUMAN  |                            |                            |                            |                            |                            |                            |                     |                            |
| Inner membrane protein OXA1L, mitochondrial precursor                 | Q15070 OXA1L_HUMAN  | 1,04<br>0,88               | 0,95<br><b>0,82</b>        | 0,85                       |                            |                            |                            |                     |                            |
| Inorganic pyrophosphatase                                             | Q15181 IPYR_HUMAN   |                            | <b>0,83</b>                |                            | 0,99<br>0,96               | 1,04<br>0,94               | 0,86<br>0,96               |                     |                            |
| Inorganic pyrophosphatase 2, mitochondrial precursor                  | Q9H2U2 IPYR2_HUMAN  | 1,12<br>1,03               | 1,13<br>0,97               | 0,86                       |                            |                            |                            |                     |                            |
| Inosine-5'-monophosphate dehydrogenase 2                              | P12268 IMDH2_HUMAN  | 1,41                       | 3,51                       | <b>7,50</b>                | 1,39<br><b>0,78</b>        | 1,34<br><b>0,75</b>        | <b>1,68</b><br><b>0,54</b> |                     |                            |
| Inositol 1,4,5-trisphosphate receptor type 1                          | Q14643 ITPR1_HUMAN  | 0,90<br>0,98               | 0,98<br>1,03               | 0,94                       |                            |                            |                            |                     |                            |
| Inositol 1,4,5-trisphosphate receptor type 2                          | Q14571 ITPR2_HUMAN  | 0,99<br>0,93               | 0,99<br>0,99               | 1,07                       |                            |                            |                            |                     |                            |
| Inositol monophosphatase 3                                            | Q9NX62 IMPA3_HUMAN  | 1,11<br>0,87               | 0,62<br>1,07               | 0,73                       |                            |                            |                            |                     |                            |
| Insulin-degrading enzyme                                              | Q5T5N2 Q5T5N2_HUMAN |                            |                            |                            | 0,00                       | 0,00                       | 0,00                       |                     |                            |
| Integrator complex subunit 8                                          | Q75QN2 INT8_HUMAN   |                            |                            |                            |                            |                            |                            | 0,00                | 0,00                       |
| Integrin alpha-5 precursor                                            | P08648 ITA5_HUMAN   | <b>1,38</b><br><b>1,18</b> | 1,10<br><b>1,15</b>        | <b>1,32</b>                | 1,64<br>2,29               | 1,12<br>1,15               | 0,84<br><b>1,69</b>        |                     |                            |
| Integrin alpha-L precursor                                            | P20701 ITAL_HUMAN   | <b>1,37</b><br>1,00        | 0,98<br>1,06               | <b>1,29</b>                | <b>2,23</b><br>1,09        | 1,12<br>0,85               | 1,41<br>0,80               |                     |                            |
| Integrin alpha-M precursor                                            | P11215 ITAM_HUMAN   |                            |                            |                            |                            |                            |                            |                     |                            |
| Integrin alpha-V precursor                                            | P06756 ITAV_HUMAN   | 0,95<br>1,25               | 1,02<br>1,39               | 1,06                       |                            |                            |                            |                     |                            |
| Integrin alpha-X precursor                                            | P20702 ITAX_HUMAN   | 1,04<br><b>1,33</b>        | 1,02<br>1,02               | 1,12                       |                            |                            |                            | 3,82                | 2,56                       |
| Integrin beta (Fragment)                                              | Q7Z3V1 Q7Z3V1_HUMAN | <b>1,10</b><br><b>1,21</b> | <b>1,13</b><br><b>0,89</b> |                            | <b>2,66</b><br><b>1,73</b> | <b>1,57</b><br>0,93        | <b>2,11</b><br><b>1,27</b> |                     |                            |
| Integrin beta (Fragment)                                              | Q6PJ75 Q6PJ75_HUMAN | 0,97<br><b>1,60</b>        | 0,99<br>1,02               | 0,99                       |                            |                            |                            | <b>2,28</b>         | <b>3,24</b>                |
| Integrin beta-2 precursor                                             | P05107 ITB2_HUMAN   |                            |                            |                            |                            |                            |                            | <b>4,47</b>         |                            |
| Integrin beta-3 precursor                                             | P05106 ITB3_HUMAN   | 1,03<br>0,85               | 0,93<br>0,94               | 1,08                       | 1,78                       | <b>0,91</b>                | 1,15                       | <b>1,92</b>         | <b>3,38</b>                |
| Integrin, alpha 2b                                                    | Q17R67 Q17R67_HUMAN | 0,00                       | 0,00                       | 0,00                       |                            |                            |                            | <b>4,40</b>         |                            |
| Integrin, alpha M                                                     | Q4VAK1 Q4VAK1_HUMAN | <b>1,50</b><br><b>2,09</b> | <b>1,12</b><br>1,11        | <b>1,33</b><br><b>1,33</b> | <b>1,75</b><br><b>2,09</b> | 1,11<br>1,49               | <b>1,33</b><br><b>1,69</b> |                     |                            |
| Integrin, beta 1                                                      | Q8WUM6 Q8WUM6_HUMAN | 1,29                       | 1,07                       | <b>1,29</b>                |                            |                            |                            |                     |                            |
| Integrin-linked protein kinase                                        | Q13418 ILK_HUMAN    | 1,06                       | 1,37                       | <b>2,88</b>                | <b>0,85</b><br><b>0,81</b> | 0,99<br>0,89               | <b>0,80</b><br><b>0,75</b> |                     |                            |
| Intercellular adhesion molecule 1                                     | Q5NKV8 Q5NKV8_HUMAN | <b>1,65</b>                | 1,33                       | 1,37                       |                            |                            |                            |                     |                            |
| Intercellular adhesion molecule 1 precursor                           | P05362 ICAM1_HUMAN  | <b>1,33</b>                | 1,19                       |                            |                            |                            |                            |                     |                            |
| Intercellular adhesion molecule 3                                     | Q6PD68 Q6PD68_HUMAN | 0,98                       | 1,14                       |                            |                            |                            |                            |                     |                            |
| Interferon (Alpha, beta and omega) receptor 2                         |                     |                            |                            |                            |                            |                            |                            | 0,00                | 0,00                       |
| Interferon gamma-inducible protein 30 preproprotein                   |                     |                            |                            |                            |                            |                            |                            | 0,00                | 0,00                       |
| Interferon, gamma-inducible protein 30                                | P13284 GILT_HUMAN   | 1,14                       | <b>1,37</b>                | 1,32                       | <b>2,17</b><br><b>1,18</b> | 1,37<br>0,95               | <b>2,27</b><br><b>1,25</b> | 0,00                | 0,00                       |
| ISG15 ubiquitin-like modifier                                         | P05161 UCRP_HUMAN   | 1,36                       | <b>3,55</b>                | <b>5,68</b>                | <b>2,39</b><br><b>4,77</b> | <b>4,77</b><br><b>4,79</b> |                            |                     |                            |
| Interferon-induced 35 kDa protein                                     | P80217 IN35_HUMAN   |                            |                            |                            | 1,50<br>0,00               | 1,19<br>0,00               | 1,22<br>0,00               |                     |                            |
| Interferon-induced GTP-binding protein Mx1                            | P20591 MX1_HUMAN    |                            |                            |                            | <b>1,73</b><br><b>1,78</b> | 2,85<br>2,58               | 2,61<br>2,13               |                     |                            |
| Interferon-induced guanylate-binding protein 1                        | P32445 GBP1_HUMAN   |                            |                            |                            | 1,11<br>1,29               | <b>1,79</b><br>1,95        | <b>1,73</b><br>1,76        |                     |                            |
| Interferon-induced protein with tetratricopeptide repeats 1           | P09914 IFIT1_HUMAN  | 1,35                       | 1,96                       | 3,69                       | <b>1,76</b><br><b>2,75</b> | <b>2,45</b><br><b>4,89</b> | <b>2,22</b><br><b>4,03</b> |                     |                            |
| Interferon-induced protein with tetratricopeptide repeats 2           | Q8IZ03 Q8IZ03_HUMAN |                            |                            | <b>15,75</b>               | 0,00<br>11,98              | 0,00<br><b>15,11</b>       | 0,00<br>10,74              |                     |                            |
| Interferon-induced protein with tetratricopeptide repeats 3           | Q14879 IFIT3_HUMAN  |                            | <b>6,74</b>                | <b>17,70</b>               | <b>2,99</b><br><b>4,57</b> | <b>4,57</b><br><b>3,72</b> |                            |                     |                            |
| Interleukin enhancer binding factor 2 variant (Fragment)              | Q53FG3 Q53FG3_HUMAN |                            |                            |                            |                            |                            |                            | 1,00<br><b>0,71</b> | <b>0,35</b><br><b>0,37</b> |
| Interleukin enhancer-binding factor 3                                 | Q12906 ILF3_HUMAN   |                            |                            |                            | 1,16                       | <b>2,69</b>                | <b>2,08</b>                | <b>0,92</b><br>0,86 | <b>0,49</b><br><b>0,64</b> |
| Interleukin-1 receptor antagonist protein precursor                   | P18510 IL1RA_HUMAN  | 1,84                       | 2,28                       | 3,09                       | 0,92<br>0,95               | <b>1,21</b><br>0,89        | 1,01<br>1,15               |                     |                            |
| Interleukin-18                                                        | B0YJ28 B0YJ28_HUMAN | 0,00                       | 0,00                       | 0,00                       |                            |                            |                            |                     |                            |
| Interleukin-4 induced protein-1 variant 2                             | Q1WMJ3 Q1WMJ3_HUMAN | 1,21<br><b>1,24</b>        | <b>1,65</b><br><b>1,16</b> | 1,44                       |                            |                            |                            | 1,07                | 1,34                       |
| Inverted formin-2                                                     | Q27J81 INF2_HUMAN   |                            |                            |                            | 1,10                       | 0,80                       | 1,48                       |                     |                            |
| Iron regulatory protein 1                                             | Q9HBB2 Q9HBB2_HUMAN |                            |                            |                            | 1,04                       | 1,15                       | 0,94                       |                     |                            |
| Iron-sulfur cluster assembly 1 homolog, mitochondrial precursor       | Q9BUE6 ISCA1_HUMAN  | 0,00                       | 0,00                       |                            |                            |                            |                            |                     |                            |
| Iron-sulfur cluster assembly enzyme ISCU, mitochondrial precursor     | Q9H1K1 ISCU_HUMAN   | <b>0,82</b><br>1,02        | 0,95<br>1,06               | 1,12                       | 1,40                       | 1,23                       | 1,24                       |                     |                            |
| Iron-sulfur cluster scaffold protein Nfu                              | Q7Z5B2 Q7Z5B2_HUMAN | 1,05                       | 1,05                       |                            |                            |                            |                            |                     |                            |
| Isobutyryl-CoA dehydrogenase, mitochondrial precursor                 | Q9UKU7 ACAD8_HUMAN  |                            |                            |                            |                            |                            |                            |                     |                            |
| Isocitrate dehydrogenase [NAD] subunit alpha, mitochondrial precursor | P50213 IDH3A_HUMAN  | 0,88<br>1,00               | 0,93<br><b>0,94</b>        | <b>0,74</b>                | <b>2,00</b><br><b>1,70</b> | <b>1,60</b><br>1,25        | <b>2,57</b><br><b>1,68</b> |                     |                            |
| Isocitrate dehydrogenase [NAD] subunit beta, mitochondrial precursor  | O43837 IDH3B_HUMAN  | <b>0,57</b><br>1,01        | 0,78<br>0,93               | <b>0,58</b>                | 1,98                       | 1,15                       | 2,09                       |                     |                            |
| Isocitrate dehydrogenase [NAD] subunit gamma, mitochondrial precursor | P51553 IDH3G_HUMAN  | 0,86<br><b>0,88</b>        | 1,03<br>1,00               | 0,90                       |                            |                            |                            |                     |                            |

|                                                                                    |                     |                             |                                    |             |                            |                      |                            |                            |                            |                            |
|------------------------------------------------------------------------------------|---------------------|-----------------------------|------------------------------------|-------------|----------------------------|----------------------|----------------------------|----------------------------|----------------------------|----------------------------|
| Isocitrate dehydrogenase [NADP], mitochondrial precursor                           | P48735 IDHP_HUMAN   | 1,05<br>0,94                | 0,92<br><b>0,90</b>                | <b>0,76</b> | <b>1,73</b>                | <b>1,40</b>          | <b>1,79</b>                |                            |                            |                            |
| Isocitrate dehydrogenase 2 (NADP+), mitochondrial variant (Fragment)               | Q53GL5 Q53GL5_HUMAN |                             |                                    |             | 1,91                       | 1,36                 | 1,84                       | <b>0,62</b>                | 3,06<br>1,67               | 7,63<br>3,65               |
| Isoleucyl-tRNA synthetase, mitochondrial precursor                                 | Q9NSE4 SYIM_HUMAN   | <b>0,87</b><br>0,96         | 0,92<br>1,00                       | <b>0,79</b> |                            |                      |                            |                            |                            |                            |
| Isopentenyl-diphosphate Delta-isomerase 1                                          | Q13907 ID11_HUMAN   | 0,83                        | 0,90                               |             |                            |                      |                            |                            |                            |                            |
| Isovaleryl Coenzyme A dehydrogenase                                                | Q53XZ9 Q53XZ9_HUMAN | 1,01<br><b>0,81</b>         | 0,94<br><b>0,75</b>                | <b>0,66</b> | 2,77                       | 1,64                 | 1,55                       |                            |                            |                            |
| Isovaleryl-CoA dehydrogenase, mitochondrial precursor                              | P26440 IVD_HUMAN    |                             |                                    |             |                            |                      |                            |                            |                            |                            |
| IWS1 homolog                                                                       | Q96ST2 IWS1_HUMAN   |                             |                                    |             |                            |                      |                            | 1,58                       | 0,58                       | <b>0,28</b>                |
| JTB protein                                                                        | Q6IB19 Q6IB19_HUMAN | 1,12                        | 1,02                               |             |                            |                      |                            |                            |                            |                            |
| Jun B proto-oncogene                                                               | Q5U079 Q5U079_HUMAN |                             |                                    |             |                            |                      |                            | 0,45                       | 0,08                       | <b>0,07</b>                |
| Junctional adhesion molecule A precursor                                           | Q9Y624 JAM1_HUMAN   |                             |                                    |             |                            |                      |                            |                            |                            |                            |
| Kangai 1                                                                           | Q7Z5N2 Q7Z5N2_HUMAN | 1,18<br>1,41<br>0,76        | 0,98<br>0,74<br>1,03               | 0,91        |                            |                      |                            |                            |                            |                            |
| Kappa-actin                                                                        | Q9BYX7 ACTK_HUMAN   | 0,96<br>0,79                | 0,80<br>1,39                       | 1,72        |                            |                      |                            |                            |                            |                            |
| Karyopherin (Importin) beta 1                                                      | Q53XN2 Q53XN2_HUMAN |                             |                                    | 6,23        | 0,61<br>0,99<br>1,05       | 0,69<br>1,08<br>1,16 | 0,49                       | 1,47<br>0,49               | 1,18<br>1,43               | 1,58<br>1,14               |
| KDEL motif-containing protein 2 precursor                                          | Q7Z4H8 KDEL2_HUMAN  | 0,88<br>1,14                | 1,09<br><b>1,31</b>                | 1,19        |                            |                      |                            |                            |                            |                            |
| Keratin 77                                                                         | Q0IIN1 Q0IIN1_HUMAN |                             |                                    |             | 0,00                       | 0,00                 | 0,00                       |                            |                            |                            |
| Keratin, type I cytoskeletal 10                                                    | P13645 K1C10_HUMAN  | <b>0,69</b><br><b>1,17</b>  | <b>0,69</b><br>0,78                | <b>1,26</b> | 0,55                       | 0,98                 | 1,81                       | <b>5,08</b><br><b>3,10</b> | 2,06<br><b>3,90</b>        | <b>13,19</b><br>1,04       |
| Keratin, type I cytoskeletal 9                                                     | P35527 K1C9_HUMAN   | 1,05                        | 1,19                               | <b>5,34</b> |                            |                      |                            | <b>7,40</b><br><b>1,58</b> | 1,57<br><b>4,51</b>        | <b>8,37</b><br><b>0,73</b> |
| Keratin, type II cytoskeletal 1                                                    | P04264 K2C1_HUMAN   | <b>0,86</b><br><b>1,34</b>  | 0,89<br><b>0,67</b>                | <b>3,04</b> | <b>0,49</b><br><b>0,20</b> | <b>1,48</b><br>0,30  | <b>1,94</b><br><b>0,59</b> | <b>3,56</b><br><b>2,41</b> | <b>0,68</b><br><b>5,12</b> | <b>5,77</b><br>0,94        |
| Keratin, type II cytoskeletal 1b                                                   | Q7Z794 K2C1B_HUMAN  |                             |                                    |             | 0,00                       | 0,00                 | 0,00                       | 0,00                       | 0,00                       | 0,00                       |
| Keratin, type II cytoskeletal 2 epidermal                                          | P35908 K22E_HUMAN   |                             |                                    |             | 1,45                       | 2,52                 | 2,05                       | <b>6,70</b><br><b>2,05</b> |                            | <b>22,56</b><br>0,89       |
| Keratin, type II cytoskeletal 6A                                                   | P02538 K2C6A_HUMAN  | 0,62                        | 0,64                               | 0,90        |                            |                      |                            |                            |                            |                            |
| Keratin, type II cytoskeletal 72                                                   | Q14CN4 K2C72_HUMAN  | 1,17                        | 1,44                               | 1,50        |                            |                      |                            |                            |                            |                            |
| Ketosamine-3-kinase                                                                | Q9HA64 KT3K_HUMAN   |                             |                                    |             | 0,91                       | 1,04                 | 0,71                       |                            |                            |                            |
| KH domain-containing, RNA-binding, signal transduction-associated protein 1        | Q07666 KHDR1_HUMAN  |                             |                                    |             |                            |                      |                            | <b>1,18</b><br><b>1,18</b> | <b>0,29</b><br><b>0,41</b> | <b>0,16</b><br><b>0,32</b> |
| KIAA0023 protein                                                                   | Q15010 Q15010_HUMAN |                             |                                    |             |                            |                      |                            | <b>0,31</b>                | 0,69                       | <b>0,35</b>                |
| KIAA0103 variant (Fragment)                                                        | Q53HG5 Q53HG5_HUMAN |                             |                                    |             | 0,00                       | 0,00                 | 0,00                       | 1,28                       | <b>2,32</b>                | <b>2,39</b>                |
| KIAA0174 protein                                                                   | Q3SYM4 Q3SYM4_HUMAN |                             |                                    |             |                            |                      |                            | 1,16<br>0,99               | <b>5,16</b><br><b>2,68</b> | <b>5,92</b><br><b>2,52</b> |
| KIAA0391                                                                           | Q8N5L5 Q8N5L5_HUMAN | <b>0,84</b>                 | 0,94                               |             |                            |                      |                            |                            |                            |                            |
| KIAA0564 protein (Fragment)                                                        | A3KMH1 A3KMH1_HUMAN | <b>0,82</b><br>0,99         | <b>0,81</b><br>0,96                | <b>0,80</b> |                            |                      |                            |                            |                            |                            |
| KIAA1228 protein                                                                   | A4D229 A4D229_HUMAN | 0,91<br>0,96                | 1,17<br>1,18                       | 0,94        | 0,65                       | 0,94                 | 0,76                       |                            |                            |                            |
| KIAA1835 protein (Fragment)                                                        | Q96JJ2 Q96JJ2_HUMAN |                             |                                    |             | 1,18                       | 1,08                 | 0,89                       |                            |                            |                            |
| Kinectin                                                                           | Q86UP2 KTN1_HUMAN   | 0,94<br>1,26                | <b>0,72</b><br>1,07                | <b>0,74</b> | 0,00<br>1,30               | 0,00<br>1,34         | 0,00<br>1,17               | 0,90<br>0,80               | 1,66<br><b>3,01</b>        | 1,45<br><b>3,60</b>        |
| Kinesin family member 1B                                                           | Q4VXC3 Q4VXC3_HUMAN |                             |                                    |             | 1,03<br>0,00               | 1,06<br>0,00         | 1,22<br>0,00               |                            |                            |                            |
| Kinesin light chain 1M                                                             | Q7RTQ4 Q7RTQ4_HUMAN |                             |                                    |             | 0,00                       | 0,00                 | 0,00                       |                            |                            |                            |
| Kinesin-1 heavy chain                                                              | P33176 KINH_HUMAN   |                             |                                    |             | 0,75<br>0,95               | 1,45<br>1,07         | 1,40<br>0,94               |                            |                            |                            |
| KTEL motif-containing protein 1 precursor                                          | Q8NBL1 KTEL1_HUMAN  |                             |                                    |             |                            |                      |                            | 0,92                       | <b>1,54</b>                | <b>1,72</b>                |
| Kunitz-type protease inhibitor 1 precursor                                         | Q43278 SPIT1_HUMAN  | 1,59                        | 0,79                               |             |                            |                      |                            |                            |                            |                            |
| Kynureninase (L-kynurenine hydrolase) variant (Fragment)                           | Q53F63 Q53F63_HUMAN |                             |                                    |             | 0,93                       | 1,08                 | 1,09                       |                            |                            |                            |
| Kynurenine--oxoglutarate transaminase 3                                            | Q6YP21 KAT3_HUMAN   | 0,97                        | 1,13                               |             |                            |                      |                            |                            |                            |                            |
| L-2-hydroxyglutarate dehydrogenase, mitochondrial precursor                        | Q9H9P8 L2HDH_HUMAN  | 1,13                        | 1,04                               |             |                            |                      |                            |                            |                            |                            |
| LAG1 longevity assurance homolog 2                                                 | Q96G23 LASS2_HUMAN  | 1,12<br>0,79                | 1,15<br>0,97                       | 1,05        |                            |                      |                            |                            |                            |                            |
| LAG1 longevity assurance homolog 6                                                 | Q6ZMG9 LASS6_HUMAN  | 0,82                        | 0,91                               |             |                            |                      |                            |                            |                            |                            |
| Lamin A/C                                                                          | P02545 LMNA_HUMAN   | <b>0,48</b>                 | <b>0,77</b>                        |             | 1,01<br>1,64               | <b>3,20</b><br>4,23  | <b>3,41</b><br>4,36        | <b>0,89</b><br><b>1,11</b> | 0,44<br><b>1,15</b>        | 0,31<br><b>0,87</b>        |
| Lamina-associated polypeptide 2, isoforms beta/gamma                               | P42167 LAP2B_HUMAN  |                             |                                    |             |                            |                      |                            | 0,93<br><b>1,11</b>        | <b>0,67</b><br><b>1,15</b> | <b>0,35</b><br><b>0,87</b> |
| Lamina-associated polypeptide 2, isoforms beta/gamma variant (Fragment)            | Q59G12 Q59G12_HUMAN | 0,00                        | 0,00                               | 0,00        | 1,10                       | 1,07                 | 1,12                       | 0,00                       | 0,00                       | 0,00                       |
| Lamin-B receptor                                                                   | Q14739 LBR_HUMAN    | 0,85<br><b>0,84</b>         | 0,87<br><b>0,80</b>                | 1,05        |                            |                      |                            | 1,14<br>0,72               | 1,06<br>1,26               | 0,95<br>1,05               |
| Lamin-B1                                                                           | P20700 LMNB1_HUMAN  | <b>0,52</b><br><b>0,71</b>  | <b>0,32</b><br>0,90                | <b>0,39</b> | 2,07                       | <b>8,20</b>          | <b>7,71</b>                | <b>1,09</b><br><b>0,54</b> | <b>0,51</b><br><b>0,40</b> | <b>0,27</b><br><b>0,26</b> |
| Lamin-B2                                                                           | Q03252 LMNB2_HUMAN  | 0,86                        | 0,88                               |             |                            |                      |                            | 1,04<br>0,92               | <b>0,55</b><br><b>0,68</b> | <b>0,28</b><br><b>0,51</b> |
| Lanosterol synthase                                                                | P48449 ERG7_HUMAN   | 1,04<br>1,00                | 1,02<br>1,06                       | 0,94        |                            |                      |                            |                            |                            |                            |
| La-related protein 1                                                               | Q6PKG0 LARP1_HUMAN  |                             |                                    |             | 0,00<br>0,77               | 0,00<br>0,59         | 0,00<br>0,38               | 0,85                       | 0,94                       | 0,82                       |
| Lectin, galactoside-binding, soluble, 3                                            | Q6NVH9 Q6NVH9_HUMAN |                             |                                    |             | 0,87                       | 0,86                 | 0,78                       | <b>1,63</b>                | 1,17                       | 0,98                       |
| Lectin, galactoside-binding, soluble, 8                                            | Q5T3Q4 Q5T3Q4_HUMAN | 0,00<br>1,00<br>0,95        | 0,00<br>1,00<br>1,03               | 1,05        |                            |                      |                            |                            |                            |                            |
| Lectin, mannose-binding, 1 variant (Fragment)                                      | Q53FS4 Q53FS4_HUMAN |                             |                                    |             |                            |                      |                            |                            |                            |                            |
| LEM domain-containing protein 2                                                    | Q8NC56 LEMD2_HUMAN  | 0,93                        | 0,95                               |             |                            |                      |                            | <b>1,18</b><br>1,03        | 0,75<br>1,30               | <b>0,56</b><br>1,19        |
| LETM1 domain-containing protein 1                                                  | Q6P1Q0 LTMD1_HUMAN  | 0,98<br><b>0,87</b><br>0,99 | 1,03<br><b>0,86</b><br><b>0,94</b> | <b>0,71</b> |                            |                      |                            | 0,74<br>0,74               | <b>2,37</b><br><b>1,65</b> | <b>3,85</b><br><b>2,52</b> |
| Leucine zipper-EF-hand-containing transmembrane protein 1, mitochondrial precursor | O95202 LETM1_HUMAN  |                             |                                    |             | 1,06<br>2,08               | 0,97<br>1,16         | 1,20<br>1,67               |                            |                            |                            |
| Leucine-rich PPR motif-containing protein, mitochondrial precursor                 | P42704 LPPRC_HUMAN  |                             |                                    |             |                            |                      |                            |                            |                            |                            |
| Leucine-rich repeat and calponin homology domain-containing protein 3 precursor    | Q96I18 LRCH3_HUMAN  | 2,02                        | 1,69                               |             |                            |                      |                            |                            |                            |                            |
| Leucine-rich repeat flightless-interacting protein 1                               | Q32MZ4 LRRF1_HUMAN  |                             |                                    |             | <b>0,63</b><br>0,53        | 1,31<br>0,91         | 1,10<br><b>0,76</b>        | 1,80                       | 1,32                       | 0,97                       |
| Leucine-rich repeat-containing protein 25 precursor                                | Q8N386 LRC25_HUMAN  | 1,31                        | 0,92                               | 1,01        |                            |                      |                            |                            |                            |                            |

[illegible]

|                                                                                               |                     |                      |                      |       |              |               |              |               |               |              |
|-----------------------------------------------------------------------------------------------|---------------------|----------------------|----------------------|-------|--------------|---------------|--------------|---------------|---------------|--------------|
| Lysosome-associated membrane glycoprotein 1 precursor                                         | P11279 LAMP1_HUMAN  | 1,15<br>0,82         | 1,12<br>0,95         | 0,88  | 1,91<br>1,90 | 0,86<br>0,88  | 1,03<br>1,19 |               |               |              |
| Lysosome-associated membrane protein-3 variant                                                | Q8N6Z9 Q8N6Z9_HUMAN | 0,94<br>0,99         | 0,78<br>0,94         | 0,69  | 2,14<br>2,18 | 0,79<br>0,74  | 1,02<br>0,87 | 1,50          | 2,44          | 4,21         |
| Lysozyme C precursor                                                                          | P61626 LYSC_HUMAN   | 0,80<br>0,88         | 0,57<br>0,56         | 0,43  | 1,66<br>1,37 | 0,89<br>0,71  | 1,26<br>0,88 | 0,73<br>0,98  | 0,58<br>0,82  | 0,57<br>0,86 |
| Lysyl-tRNA synthetase                                                                         | Q9HB23 Q9HB23_HUMAN |                      |                      |       | 0,69         | 1,01          | 0,83         |               |               |              |
| M6PR protein                                                                                  | Q6I9U3 Q6I9U3_HUMAN | 1,00<br>0,90         | 0,92<br>0,92         | 1,28  | 1,81<br>1,86 | 1,59<br>1,35  | 1,81<br>1,40 | 1,50<br>1,86  | 3,15<br>1,64  | 6,60<br>3,11 |
| MACRO domain-containing protein 1                                                             | Q9BQ69 MACD1_HUMAN  |                      |                      |       |              |               |              |               |               |              |
| Macrophage mannose receptor 2 precursor                                                       | Q9UBG0 MRC2_HUMAN   | 1,10<br>0,88         | 1,07<br>0,90         |       |              |               |              |               |               |              |
| Macrophage scavenger receptor types I and II                                                  | P21757 MSRE_HUMAN   | 1,00<br>1,00         | 0,73                 | 0,57  |              |               |              | 1,06<br>1,26  | 1,35<br>0,98  | 1,37<br>1,25 |
| Macrophage-capping protein                                                                    | P40121 CAPG_HUMAN   | 1,32<br>1,16         | 2,19<br>1,28         | 3,58  | 0,82<br>0,74 | 0,83<br>0,85  | 0,73<br>0,66 | 1,03<br>1,13  | 1,05<br>0,66  | 0,95<br>0,58 |
| Magnesium transporter MRS2 homolog, mitochondrial precursor                                   | Q9HD23 MRS2_HUMAN   | 0,74<br>0,95         | 0,76<br>1,19         | 0,66  |              |               |              |               |               |              |
| Magnesium transporter protein 1 precursor                                                     | Q9H0U3 MAGT1_HUMAN  |                      |                      |       |              |               |              | 0,74          | 2,22          | 2,86         |
| MAGUK p55 subfamily member 4                                                                  | Q96JB8 MPP4_HUMAN   | 1,10<br>0,97         | 1,23<br>1,23         |       |              |               |              |               |               |              |
| Major facilitator superfamily domain-containing protein 10                                    | Q14728 MFS10_HUMAN  |                      |                      | 0,96  |              |               |              |               |               |              |
| Major histocompatibility complex, class I, A                                                  | Q5SUL4 Q5SUL4_HUMAN | 1,38                 | 1,00                 | 1,17  |              |               |              |               |               |              |
| Major histocompatibility complex, class I, C                                                  | B0S7Z6 B0S7Z6_HUMAN |                      |                      |       |              |               |              | 1,40          | 4,19          | 5,03         |
| Major histocompatibility complex, class II, DP beta 1                                         | Q95HC1 Q95HC1_HUMAN | 1,18<br>0,93         | 1,05<br>0,92         | 0,98  | 1,42<br>1,71 | 0,98<br>1,14  | 1,50<br>1,36 | 1,03          | 2,29          | 2,32         |
| Major histocompatibility complex, class II, DP beta 1                                         | Q5SQ72 Q5SQ72_HUMAN |                      |                      |       |              |               |              | 1,11          | 1,37          | 1,83         |
| Major histocompatibility complex, class II, DR alpha                                          | Q5SP06 Q5SP06_HUMAN | 0,96                 | 0,73                 | 0,83  | 1,95         | 1,10          | 1,42         | 1,31          | 1,68          | 2,40         |
| Major histocompatibility complex, class II, DR beta 3                                         | Q5STE0 Q5STE0_HUMAN |                      |                      |       |              |               |              |               |               |              |
| Major prion protein (Fragment)                                                                | Q86XR1 Q86XR1_HUMAN | 0,87<br>0,00<br>0,00 | 0,69<br>0,00<br>0,00 | 0,00  |              |               |              | 1,31          | 0,46          | 0,60         |
| Major vault protein                                                                           | Q14764 MVP_HUMAN    | 1,71                 | 1,75                 | 5,79  | 0,83<br>1,00 | 1,08<br>1,26  | 1,37<br>1,82 | 1,48          | 1,40          | 3,45         |
| Malate dehydrogenase                                                                          | A8K414 A8K414_HUMAN | 0,84<br>0,89         | 0,87<br>0,93         | 0,57  |              | 1,84<br>2,19  | 1,43<br>1,81 | 2,04<br>2,97  | 0,75          | 1,19<br>1,94 |
| Malate dehydrogenase (Fragment)                                                               | Q0QF37 Q0QF37_HUMAN |                      |                      |       |              |               |              |               |               |              |
| Malate dehydrogenase, cytoplasmic                                                             | P40925 MDHC_HUMAN   | 1,05                 | 1,14                 | 0,91  | 0,86<br>0,87 | 0,98<br>1,02  | 0,95<br>1,02 |               |               |              |
| Malate dehydrogenase, mitochondrial precursor                                                 | P40926 MDHM_HUMAN   |                      |                      |       |              |               |              | 1,16          | 1,79          | 3,59         |
| Malonyl CoA-acyl carrier protein transacylase, mitochondrial precursor                        | Q8IVS2 FABD_HUMAN   | 0,92<br>1,09<br>1,00 | 0,93<br>1,08<br>0,89 | 1,10  |              |               |              |               |               |              |
| Malonyl-CoA decarboxylase, mitochondrial precursor                                            | Q95822 DCMC_HUMAN   |                      |                      |       |              |               |              |               |               |              |
| Mannose receptor                                                                              | Q0Z8D6 Q0Z8D6_HUMAN |                      |                      |       |              |               |              |               |               |              |
| Mannose receptor C type 1-like protein 1                                                      | Q5VSK2 Q5VSK2_HUMAN | 1,08<br>1,09         | 0,71<br>0,76         | 0,53  |              | 2,18          | 1,34<br>1,42 | 1,07          | 1,14          | 1,73         |
| Mannose-1-phosphate guanylttransferase alpha                                                  | Q96J6 GMPPA_HUMAN   |                      |                      |       | 0,00<br>0,67 | 0,00<br>0,72  | 0,00<br>0,70 |               |               |              |
| Mannose-6-phosphate receptor-binding protein 1                                                | O60664 M6PBP_HUMAN  | 0,87                 | 1,14                 | 1,37  | 0,82<br>0,67 | 0,87<br>0,72  | 0,84<br>0,70 |               |               |              |
| Mannose-P-dolichol utilization defect 1                                                       | Q9BUU8 Q9BUU8_HUMAN | 0,83                 | 0,95                 | 0,98  |              |               |              |               |               |              |
| Mannosidase, alpha, class 2B, member 1 variant (Fragment)                                     | Q59E90 Q59E90_HUMAN | 1,16                 | 1,61                 | 1,40  |              |               |              |               |               |              |
| Mannosyl (Alpha-1,3)-glycoprotein beta-1,2-N-acetylglucosaminyltransferase variant (Fragment) | Q59G70 Q59G70_HUMAN |                      |                      |       |              |               |              |               |               |              |
| Mannosyl-oligosaccharide 1,2-alpha-mannosidase IA                                             | P33908 MA1A1_HUMAN  | 1,09<br>1,01<br>0,95 | 0,97<br>0,41<br>0,74 | 0,48  |              |               |              |               |               |              |
| Mannosyl-oligosaccharide glucosidase                                                          | Q13724 GCS1_HUMAN   | 0,97                 | 1,09                 |       |              |               |              |               |               |              |
| MAP kinase-activated protein kinase 3                                                         | Q16644 MAPK3_HUMAN  |                      |                      |       | 1,00<br>1,03 | 0,90<br>1,00  | 0,73<br>0,93 |               |               |              |
| Masparidin                                                                                    | Q9NZD8 SPG21_HUMAN  |                      |                      |       |              |               |              |               |               |              |
| Mast cell-expressed membrane protein 1                                                        | P24534 EF1B_HUMAN   | 1,16<br>1,28         | 1,20<br>0,98         | 1,30  |              |               |              | 1,19          | 2,03          | 1,93         |
| Matrin-3                                                                                      | P43243 MATR3_HUMAN  |                      |                      |       |              |               |              | 0,65          | 0,27          | 0,25         |
| Matrix metalloproteinase-14 precursor                                                         | P50281 MMP14_HUMAN  | 0,92<br>1,23         | 0,86<br>1,20         | 1,03  |              |               |              |               |               |              |
| Matrix metalloproteinase-21 precursor                                                         | Q8N119 MMP21_HUMAN  |                      |                      |       |              |               |              |               |               |              |
| Matrix metalloproteinase-9 precursor                                                          | P14780 MMP9_HUMAN   | 0,73<br>0,87         | 0,30<br>0,75         | 0,28  |              |               |              |               |               |              |
| Matrix protein - Infectious hematopoietic necrosis virus (strain WRAC)                        |                     |                      |                      |       |              |               |              | 0,00          | 0,00          | 0,00         |
| Matrix protein 1                                                                              | P63233 JM1_I72A2    | 2,42<br>1,25         | 8,17<br>5,19         | 16,62 | 2,73<br>2,26 | 10,84<br>8,28 | 7,38<br>6,04 | 10,96<br>6,64 | 12,29<br>8,33 | 5,53<br>5,05 |
| Mature T-cell proliferation 1                                                                 | Q5HYP9 Q5HYP9_HUMAN |                      |                      |       |              |               |              |               |               |              |
| Megakaryoblastic leukemia (Translocation) 1                                                   | B0QY84 B0QY84_HUMAN | 0,64                 | 0,79                 |       |              |               |              |               |               |              |
| Megakaryocyte-associated tyrosine-protein kinase                                              | P42679 MATK_HUMAN   | 0,00<br>0,00         | 0,00<br>0,00         | 0,00  |              |               |              |               |               |              |
| Melanoma inhibitory activity protein 3 precursor                                              | Q5JRA6 MIA3_HUMAN   | 0,88<br>1,05         | 0,89<br>1,21         | 0,95  |              |               |              |               |               |              |
| Membrane alanine aminopeptidase variant (Fragment)                                            | Q59E93 Q59E93_HUMAN | 1,40<br>1,07         | 1,28<br>1,02         | 1,26  | 1,71<br>1,63 | 1,13<br>1,13  | 1,58<br>1,47 | 1,15<br>0,95  | 0,50<br>0,56  | 0,65<br>0,56 |
| Membrane-associated progesterone receptor component 2                                         | O15173 PGRC2_HUMAN  | 1,12<br>1,00         | 1,31<br>1,06         | 1,31  |              | 0,00          | 0,00<br>0,00 | 1,35          | 2,18          | 4,47         |
| Membrane-bound O-acyltransferase domain-containing protein 1                                  | Q6ZNC8 MBOA1_HUMAN  | 0,99<br>0,91         | 0,91<br>1,11         |       |              |               |              |               |               |              |
| Membrane-bound O-acyltransferase domain-containing protein 7                                  | Q96N66 MBOA7_HUMAN  | 0,83<br>0,83         | 0,90<br>0,90         | 1,01  |              |               |              |               |               |              |
| Mesoderm development candidate 2                                                              | Q14696 MESD2_HUMAN  | 0,95<br>0,97         | 1,00<br>1,05         | 0,89  | 2,17<br>1,57 | 1,19<br>1,06  | 2,63<br>1,52 | 0,97<br>1,04  | 2,99<br>2,31  | 3,40<br>3,67 |
| Metalloreductase STEAP3                                                                       | Q658P3 STEA3_HUMAN  | 1,30                 | 0,84                 | 0,92  |              |               |              |               |               |              |
| Metastasis-associated protein MTA2                                                            | Q94776 MTA2_HUMAN   |                      |                      |       |              |               |              | 1,31<br>0,31  | 0,82<br>0,30  | 0,89<br>0,29 |
| Metaxin 1                                                                                     | Q9BUU3 Q9BUU3_HUMAN | 0,98<br>0,94         | 0,95<br>0,89         | 0,82  |              |               |              | 0,84          | 1,69          | 2,24         |
| Metaxin 2                                                                                     | Q8IZ68 Q8IZ68_HUMAN | 0,88<br>1,09         | 0,80<br>0,93         | 0,80  |              |               |              | 0,00          | 0,00          | 0,00         |
| Methionine aminopeptidase 1                                                                   | P53582 AMPM1_HUMAN  |                      |                      |       |              |               |              | 0,00          | 0,00          | 0,00         |
|                                                                                               | Q9Y3D2 MSRR2_HUMAN  |                      |                      |       |              |               |              |               |               |              |

|                                                                        |                     |             |             |             |             |             |
|------------------------------------------------------------------------|---------------------|-------------|-------------|-------------|-------------|-------------|
| Methionine-R-sulfoxide reductase B2, mitochondrial precursor           |                     | 0,87        | 0,75        |             |             |             |
| Methionyl-tRNA formyltransferase, mitochondrial precursor              | Q96DP5 FMT_HUMAN    | 0,85        | 1,23        |             |             |             |
| Methionyl-tRNA synthetase, cytoplasmic                                 | P56192 SYMC_HUMAN   |             |             | 0,89        | 0,96        | <b>0,71</b> |
| Methionyl-tRNA synthetase, mitochondrial precursor                     | Q96GW9 SYMM_HUMAN   |             |             |             |             |             |
| Methyl-CpG-binding domain protein 1                                    | Q9UIS9 MBD1_HUMAN   | 0,92        | 0,85        |             |             |             |
| Methyl-CpG-binding domain protein 2                                    | Q9UBB5 MBD2_HUMAN   |             |             |             | 0,00        | 0,00        |
| Methyl-CpG-binding domain protein 4                                    | Q95243 MBD4_HUMAN   |             |             |             | 0,85        | <b>0,52</b> |
| Methyl-CpG-binding protein 2                                           | P51608 MECP2_HUMAN  |             |             |             | <b>0,76</b> | 0,80        |
| Methylcrotonoyl-CoA carboxylase beta chain, mitochondrial precursor    | Q9HCC0 MCCB_HUMAN   | 0,96        | 0,89        | 0,78        | 0,00        | 0,00        |
| Methylcrotonoyl-CoA carboxylase subunit alpha, mitochondrial precursor | Q96RQ3 MCCA_HUMAN   | 0,95        | 0,95        |             | 0,85        | <b>0,52</b> |
| Methylmalonic aciduria type A protein, mitochondrial precursor         | Q8IVH4 MMAA_HUMAN   | 0,92        | 0,90        | 0,92        | 0,76        | 0,80        |
| Methylmalonyl-CoA epimerase, mitochondrial precursor                   | Q96PE7 MCEE_HUMAN   | 1,07        | 1,02        |             | 0,00        | 0,00        |
| Methylmalonyl-CoA mutase, mitochondrial precursor                      | P22033 MUTA_HUMAN   | 0,40        | <b>0,50</b> | <b>0,31</b> | 1,11        | 0,56        |
| Methyltransferase-like protein 7A precursor                            | Q9H8H3 MET7A_HUMAN  | 1,12        | 0,94        |             | 1,80        | 1,41        |
| Methyltransferase-like protein 7B precursor                            | Q6UX53 MET7B_HUMAN  | 0,00        | 0,00        | 0,00        | 0,00        | 0,00        |
| MGAT1 protein                                                          | Q6IBE3 Q6IBE3_HUMAN | 1,05        | 1,04        |             | 0,59        | 0,59        |
| MGC70857 protein                                                       | Q6GMR2 Q6GMR2_HUMAN | <b>0,85</b> | <b>0,84</b> | <b>0,64</b> | 1,80        | 1,41        |
| MGST1 protein (Fragment)                                               | Q6LET6 Q6LET6_HUMAN | 1,05        | 0,99        |             | 0,00        | 0,00        |
| MHC cell surface glycoprotein precursor                                | Q30118 Q30118_HUMAN | 1,14        | <b>1,12</b> |             | 0,94        | 0,80        |
| MHC class I antigen                                                    | Q546L8 Q546L8_HUMAN | 1,15        | 1,18        |             | 0,00        | 0,00        |
| MHC class I antigen                                                    | A4H284 A4H284_HUMAN | 1,08        | <b>0,74</b> | <b>0,73</b> | 0,94        | 0,80        |
| MHC class I antigen (Fragment)                                         | Q6F3I9 Q6F3I9_HUMAN | 0,84        | 0,63        | 0,64        | 0,00        | 0,00        |
| MHC class I antigen (Fragment)                                         | Q860B1 Q860B1_HUMAN | 0,90        | 0,78        |             | 0,94        | 0,80        |
| MHC class I antigen (Fragment)                                         | Q6F3H8 Q6F3H8_HUMAN | 1,09        | 0,85        | 0,98        | 0,00        | 0,00        |
| MHC class I antigen (Fragment)                                         | A3F720 A3F720_HUMAN |             |             |             | 0,94        | 0,80        |
| MHC class I antigen (Fragment)                                         | Q0VJ91 Q0VJ91_HUMAN |             |             |             | 1,77        | 1,09        |
| MHC class I antigen (Fragment)                                         | Q5JZ14 Q5JZ14_HUMAN |             |             |             | 1,09        | 1,13        |
| MHC class I antigen precursor (Fragment)                               | Q6R741 Q6R741_HUMAN | 0,92        | 0,78        | 0,84        | 1,49        | 0,86        |
| MHC class II antigen                                                   | Q6YJU6 Q6YJU6_HUMAN | 0,95        | 0,90        | 0,00        | 1,07        | 1,07        |
| MHC class II antigen                                                   | Q58ZE2 Q58ZE2_HUMAN | <b>0,78</b> | <b>0,90</b> |             |             |             |
| MHC class II antigen                                                   | Q5Y7D6 Q5Y7D6_HUMAN | 1,06        | <b>0,86</b> |             |             |             |
| MHC class II antigen (Fragment)                                        | Q8N5A0 Q8N5A0_HUMAN | 0,95        | <b>0,76</b> | 0,88        |             |             |
| MHC class II antigen (Fragment)                                        | Q5DUF5 Q5DUF5_HUMAN | 0,62        | 0,80        |             |             |             |
| MHC class II antigen (Fragment)                                        | Q3LA86 Q3LA86_HUMAN | 1,01        | 0,98        |             |             |             |
| MHC class II antigen (Fragment)                                        | Q6S5I0 Q6S5I0_HUMAN |             |             |             | 1,71        | 0,94        |
| Microfibrillar-associated protein 1                                    | Q86TG6 Q86TG6_HUMAN |             |             |             | <b>0,72</b> |             |
| Microphthalmia-associated transcription factor                         | O75030 MITF_HUMAN   |             |             |             | 1,44        | 0,97        |
| Microsomal glutathione S-transferase 2                                 | Q99735 MGST2_HUMAN  | 0,00        | 0,00        | 0,00        | 1,00        | 1,00        |
| Microsomal glutathione S-transferase 3                                 | Q13011 ECH1_HUMAN   | 0,79        | 0,70        |             |             |             |
| Microsomal glutathione S-transferase 3                                 | Q5VV89 Q5VV89_HUMAN | 0,92        | 0,99        | 0,93        | 1,75        | 2,89        |
| Microsomal glutathione S-transferase 3 variant (Fragment)              | Q53GB9 Q53GB9_HUMAN | 0,98        | 1,02        |             | 3,16        | 3,16        |
| Microtubule-associated protein 1S                                      | Q66K74 MAP1S_HUMAN  |             |             |             |             |             |
| Microtubule-associated protein 4                                       | P27816 MAP4_HUMAN   | 0,55        | 0,98        | 0,71        | <b>0,82</b> | <b>0,28</b> |
| Microtubule-associated protein RP/EB family member 1                   | Q15691 MARE1_HUMAN  | 0,72        | <b>0,76</b> | <b>0,64</b> | 1,04        | 0,64        |
| Midasin                                                                | Q9NU22 MDN1_HUMAN   | 0,56        | 0,69        | 0,57        | 0,28        | <b>0,20</b> |
| Migration-inducing gene 14                                             | Q5J8M4 Q5J8M4_HUMAN | 0,88        | 1,01        | <b>0,87</b> | 0,00        | 0,00        |
| Migration-inducing protein 12                                          | Q596K9 Q596K9_HUMAN | <b>0,70</b> | <b>0,85</b> | <b>0,57</b> | 0,00        | 0,00        |
| Mimitin, mitochondrial precursor                                       | Q8N183 MIMIT_HUMAN  | 0,94        | 1,13        | <b>0,74</b> | 0,00        | 0,00        |
| Minichromosome maintenance protein 3 variant (Fragment)                | Q53HJ4 Q53HJ4_HUMAN | <b>1,24</b> | 1,10        |             | 1,19        | 4,26        |
| Minor histocompatibility antigen H13                                   | Q8TCT9 HM13_HUMAN   | 0,88        | 1,04        | 1,06        | 0,00        | 0,00        |
| Mitochondrial 18 kDa protein                                           | Q9UDX5 MTP18_HUMAN  | 1,24        | 1,10        |             | 0,00        | 0,00        |
| Mitochondrial 28S ribosomal protein S10                                | P82664 RT10_HUMAN   | 0,89        | 0,89        |             | 0,00        | 0,00        |
| Mitochondrial 28S ribosomal protein S14                                | O60783 RT14_HUMAN   | 1,11        | 1,22        |             | 0,00        | 0,00        |
| Mitochondrial 28S ribosomal protein S2                                 | Q9Y399 RT02_HUMAN   | <b>1,27</b> | 1,11        | 1,06        | 0,00        | 0,00        |
| Mitochondrial 28S ribosomal protein S22                                | P82650 RT22_HUMAN   | 0,98        | 1,01        |             | 0,00        | 0,00        |
| Mitochondrial 28S ribosomal protein S25                                | P82663 RT25_HUMAN   | <b>0,80</b> | 0,75        | <b>0,62</b> | 0,00        | 0,00        |
| Mitochondrial 28S ribosomal protein S27                                | Q92552 RT27_HUMAN   | <b>0,90</b> | <b>0,90</b> |             | 0,00        | 0,00        |
| Mitochondrial 28S ribosomal protein S28                                | Q9Y2Q9 RT28_HUMAN   | 0,00        | 0,00        | 0,00        | 0,00        | 0,00        |
| Mitochondrial 28S ribosomal protein S30                                | Q9NP92 RT30_HUMAN   | 0,88        | 0,99        |             | 0,00        | 0,00        |
| Mitochondrial 28S ribosomal protein S33                                | Q9Y291 RT33_HUMAN   | 1,13        | 1,62        | 1,98        | 0,00        | 0,00        |
|                                                                        |                     | 1,07        | 0,90        |             | <b>0,72</b> | 0,83        |

|                                                                          |                     |                     |                            |             |                     |                     |                            |                            |
|--------------------------------------------------------------------------|---------------------|---------------------|----------------------------|-------------|---------------------|---------------------|----------------------------|----------------------------|
| Mitochondrial 28S ribosomal protein S34                                  | P82930 RT34_HUMAN   | 0,94<br>0,99        | 0,88<br>0,92               | 0,68        |                     |                     |                            |                            |
| Mitochondrial 28S ribosomal protein S36                                  | P82909 RT36_HUMAN   | 0,83<br>1,03        | 1,00<br><b>0,87</b>        | 0,90        |                     | 2,15<br>1,65        | 4,39<br>2,46               | 5,94<br>4,51               |
| Mitochondrial 28S ribosomal protein S6                                   | P82932 RT06_HUMAN   | 0,99<br>1,02        | 0,82<br>0,90               | <b>0,60</b> |                     |                     |                            |                            |
| Mitochondrial 39S ribosomal protein L23                                  | Q16540 RM23_HUMAN   | 0,80                | <b>0,85</b>                |             |                     |                     |                            |                            |
| Mitochondrial 39S ribosomal protein L27                                  | Q9P0M9 RM27_HUMAN   | 1,01<br>0,92        | 1,06<br><b>1,11</b>        | 1,14        |                     |                     |                            |                            |
| Mitochondrial 39S ribosomal protein L39                                  | Q9NYK5 RM39_HUMAN   | 1,00<br>0,91        | <b>0,83</b><br>0,96        | <b>0,69</b> |                     |                     |                            |                            |
| Mitochondrial 39S ribosomal protein L4                                   | Q9BYD3 RM04_HUMAN   | 0,94<br>0,93        | 0,93<br><b>0,83</b>        | 0,79        |                     |                     |                            |                            |
| Mitochondrial 39S ribosomal protein L49                                  | Q13405 RM49_HUMAN   | 1,20<br>0,97        | 0,94<br>0,98               | 1,13        |                     |                     |                            |                            |
| Mitochondrial 39S ribosomal protein L50                                  | Q8N5N7 RM50_HUMAN   | 0,62<br>0,80        | 0,78<br>0,88               | 0,39        |                     |                     |                            |                            |
| Mitochondrial aldehyde dehydrogenase 2 variant (Fragment)                | Q53FB6 Q53FB6_HUMAN | 0,98<br>0,96        | 0,94<br><b>0,91</b>        | <b>0,70</b> | 2,01<br><b>2,29</b> | 2,05<br>1,44        | <b>3,57</b><br><b>2,17</b> |                            |
| Mitochondrial antiviral-signaling protein                                | Q7Z434 MAVS_HUMAN   | 0,00                | 0,00                       |             | 0,90                | 0,70                | 0,91                       |                            |
| Mitochondrial carnitine/acylcarnitine carrier protein                    | Q43772 MCAT_HUMAN   | 1,10<br>0,94        | 0,99<br><b>0,79</b>        | 0,84        |                     |                     |                            |                            |
| Mitochondrial carnitine/acylcarnitine carrier protein CACL               | Q8N8R3 MCATL_HUMAN  | 0,98<br>0,94        | 0,89<br><b>0,76</b>        | 0,84        |                     |                     |                            |                            |
| Mitochondrial carrier homolog 2                                          | Q9Y6C9 MTCH2_HUMAN  | <b>1,17</b>         | 0,91                       | 0,90        |                     | 1,36                | 1,09                       | <b>2,85</b>                |
| Mitochondrial carrier homolog 2 variant (Fragment)                       | Q53G34 Q53G34_HUMAN | <b>1,14</b>         | <b>0,91</b>                |             |                     | <b>0,49</b>         | 0,93                       | <b>1,26</b>                |
| Mitochondrial chaperone BCS1                                             | Q9Y276 BCS1_HUMAN   | 1,03                | 1,16                       |             |                     |                     |                            |                            |
| Mitochondrial citrate transport protein (Fragment)                       | Q6LAP8 Q6LAP8_HUMAN | 0,97                | <b>0,89</b>                |             |                     | 1,23<br>1,13        | 0,90<br><b>1,43</b>        | <b>2,35</b><br><b>2,33</b> |
| Mitochondrial deoxynucleotide carrier                                    | Q9HC21 DNC_HUMAN    | 1,17<br><b>1,07</b> | 1,04<br>1,02               | 0,80        |                     |                     |                            |                            |
| Mitochondrial dicarboxylate carrier                                      | Q9UBX3 DIC_HUMAN    | 1,16<br>1,01        | 1,24<br>0,93               | 1,25        |                     |                     |                            |                            |
| Mitochondrial dimethyladenosine transferase 1, mitochondrial precursor   | Q8WVM0 TFB1M_HUMAN  | <b>0,86</b>         | 0,99                       |             |                     |                     |                            |                            |
| Mitochondrial dimethyladenosine transferase 2, mitochondrial precursor   | Q9H5Q4 TFB2M_HUMAN  | 0,96                | 0,89                       |             |                     |                     |                            |                            |
| Mitochondrial fission 1 protein                                          | Q9Y3D6 FIS1_HUMAN   | 1,00                | 0,86                       |             |                     |                     |                            |                            |
| Mitochondrial folate transporter/carrier                                 | Q9H2D1 IMFTC_HUMAN  | 0,95                | 0,88                       |             |                     |                     |                            |                            |
| Mitochondrial glutamate carrier 1                                        | Q9H936 GHC1_HUMAN   | <b>1,40</b><br>0,94 | 1,20<br>0,99               | 1,16        |                     |                     |                            |                            |
| Mitochondrial import inner membrane translocase subunit Tim10            | P62072 TIM10_HUMAN  | 0,95<br>1,18        | 0,82<br>0,85               | <b>0,53</b> |                     | 0,79                | 1,93                       | <b>2,67</b>                |
| Mitochondrial import inner membrane translocase subunit Tim13            | Q9Y5L4 TIM13_HUMAN  | 0,00<br>0,81        | 0,00<br>0,95               | 0,00        |                     | 0,00                | 0,00                       | 0,00                       |
| Mitochondrial import inner membrane translocase subunit TIM14            | Q96DA6 TIM14_HUMAN  | 1,02<br>1,01        | 0,91<br>0,98               | <b>0,76</b> |                     |                     |                            |                            |
| Mitochondrial import inner membrane translocase subunit Tim16            | Q9Y3D7 TIM16_HUMAN  |                     |                            |             |                     | 0,85                | 1,93                       | 1,72                       |
| Mitochondrial import inner membrane translocase subunit Tim22            | Q9Y584 TIM22_HUMAN  | 0,97                | 0,84                       |             |                     |                     |                            |                            |
| Mitochondrial import inner membrane translocase subunit Tim23            | O14925 TIM23_HUMAN  | 0,00<br>0,66        | 0,00<br>0,78               | 0,00        |                     |                     |                            |                            |
| Mitochondrial import inner membrane translocase subunit Tim8 B           | Q9Y5J9 TIM8B_HUMAN  | 0,79<br>0,92        | 0,45<br>0,92               | 0,30        |                     |                     |                            |                            |
|                                                                          | Q9Y5J7 TIM9_HUMAN   | 1,00<br><b>1,22</b> | 0,94<br>1,12               | <b>0,59</b> |                     | 0,70                | 1,69                       | 4,18                       |
| Mitochondrial import inner membrane translocase subunit Tim9             | Q15388 TOM20_HUMAN  | 0,84<br><b>1,27</b> | 0,91<br>1,27               | 0,85        |                     |                     |                            |                            |
| Mitochondrial import receptor subunit TOM20 homolog                      | Q9NS69 TOM22_HUMAN  | 0,00<br><b>0,74</b> | 0,00<br>1,00               | 0,00        |                     | 0,00                | 0,00                       | 0,00                       |
| Mitochondrial import receptor subunit TOM22 homolog                      | O96008 TOM40_HUMAN  | 1,22<br>1,08        | 0,92<br><b>1,15</b>        | 0,85        |                     | 1,10<br><b>0,31</b> | 1,23<br>0,72               | 3,33<br>1,01               |
| Mitochondrial import receptor subunit TOM40 homolog                      | Q9P0U1 TOM7_HUMAN   | 1,00                | <b>0,69</b>                |             |                     | 0,85<br><b>1,36</b> | 1,25<br>0,95               | 1,07<br>1,21               |
| Mitochondrial import receptor subunit TOM7 homolog                       | Q16891 IMMT_HUMAN   | 0,95<br>1,03        | 0,95<br><b>1,06</b>        | <b>0,88</b> | 1,38<br><b>1,66</b> | 0,93<br>0,99        | 1,08<br>0,87               | <b>0,85</b><br><b>0,50</b> |
| Mitochondrial intermediate peptidase, mitochondrial precursor            | Q99797 MIPEP_HUMAN  | 0,88<br>1,00        | 0,83<br>0,97               | 0,64        |                     |                     |                            |                            |
| Mitochondrial intermembrane space import and assembly protein 40         | Q8N4Q1 MIA40_HUMAN  | 0,97<br>1,05        | 0,87<br>0,87               | <b>0,57</b> |                     |                     |                            |                            |
| Mitochondrial PDHA1                                                      | A5YVE9 A5YVE9_HUMAN | 0,96                | 0,97                       |             |                     |                     |                            |                            |
| Mitochondrial precursor proteins import receptor                         | O94826 TOM70_HUMAN  | 0,99<br><b>1,21</b> | 0,93<br><b>1,21</b>        | 0,84        |                     |                     |                            |                            |
| Mitochondrial Rho GTPase 1                                               | Q8IXI2 MIRO1_HUMAN  | 1,43<br>1,00        | 0,97<br>1,07               | 1,28        |                     |                     |                            |                            |
| Mitochondrial Rho GTPase 2                                               | Q8IXI1 MIRO2_HUMAN  | 1,02<br>0,92        | <b>0,77</b><br>0,93        | 0,88        |                     |                     |                            |                            |
| Mitochondrial ribosomal protein 63                                       | Q9BQC6 RT63_HUMAN   | 0,81                | <b>0,68</b>                | <b>0,63</b> |                     |                     |                            |                            |
| Mitochondrial ribosomal protein L28                                      | Q4TT38 Q4TT38_HUMAN | 0,99                | 1,00                       |             |                     |                     |                            |                            |
| Mitochondrial ribosomal protein L43                                      | B1AL10 B1AL10_HUMAN | 0,94                | 0,95                       |             |                     |                     |                            |                            |
| Mitochondrial ribosomal protein S11 isoform A variant (Fragment)         | Q53FX9 Q53FX9_HUMAN | 0,89                | 0,94                       |             |                     |                     |                            |                            |
| Mitochondrial ribosomal protein S18A (Fragment)                          | Q5QPA5 Q5QPA5_HUMAN | 0,87                | 0,82                       | <b>0,71</b> |                     |                     |                            |                            |
| Mitochondrial ribosomal protein S21                                      | Q5TB11 Q5TB11_HUMAN | 0,00<br>0,98        | 0,00<br>0,83               | 0,00        |                     |                     |                            |                            |
| Mitochondrial ribosomal protein S23                                      | Q9Y3D9 RT23_HUMAN   | 1,09<br>0,95        | 1,13<br>0,88               | 0,87        |                     |                     |                            |                            |
| Mitochondrial ribosomal protein S27                                      | Q6P1S1 Q6P1S1_HUMAN | 0,82<br>0,00        | 0,79<br>0,00               | <b>0,64</b> |                     |                     |                            |                            |
| Mitochondrial ribosomal protein S9                                       | Q6PG40 Q6PG40_HUMAN | 1,35<br>1,21        | 1,89<br><b>2,25</b>        | 1,75        |                     |                     |                            |                            |
| Mitochondrial-processing peptidase subunit beta, mitochondrial precursor | O75439 MPPB_HUMAN   | 0,93<br><b>0,89</b> | <b>0,81</b><br><b>0,86</b> | <b>0,54</b> |                     |                     |                            |                            |
| Mitofusin-2                                                              | O95140 MFN2_HUMAN   | 1,00<br><b>1,22</b> | 0,81<br>1,12               | <b>0,75</b> |                     |                     |                            |                            |
| Mitogen-activated protein kinase 1                                       | Q499G7 Q499G7_HUMAN |                     |                            |             | 0,92<br><b>0,87</b> | 1,03<br>0,92        | 0,92<br>0,82               |                            |
| Mitogen-activated protein kinase kinase 1-interacting protein 1          | Q9UHA4 MK11_HUMAN   | 1,52                | 1,44                       |             |                     |                     |                            |                            |
| Mitogen-activated protein-binding protein-interacting protein            | A8K534 A8K534_HUMAN |                     |                            |             |                     | 1,62                | 1,92                       | 1,87                       |
| Mitotic checkpoint protein BUB3                                          | O43684 BUB3_HUMAN   |                     |                            |             |                     | 1,79<br>0,33        | 0,56<br><b>0,46</b>        | 0,64<br>0,37               |
| MLL/SEPTIN6 fusion protein (Fragment)                                    | Q8NFH9 Q8NFH9_HUMAN |                     |                            |             |                     | 1,22                | <b>0,68</b>                | <b>0,42</b>                |
| Moesin                                                                   | P26038 MOES_HUMAN   | <b>1,79</b>         | <b>1,57</b>                | <b>1,62</b> | 0,99                | <b>1,13</b>         | <b>1,14</b>                | <b>1,63</b>                |
|                                                                          |                     |                     |                            |             |                     | 1,16                |                            | <b>1,45</b>                |

|                                                                                                      |                     |                            |                            |             |                            |                            |                            |                            |                            |                             |
|------------------------------------------------------------------------------------------------------|---------------------|----------------------------|----------------------------|-------------|----------------------------|----------------------------|----------------------------|----------------------------|----------------------------|-----------------------------|
|                                                                                                      |                     | <b>2,00</b>                | <b>1,41</b>                |             | 0,97                       | 1,24                       | <b>1,25</b>                | 1,05                       | 1,01                       | 1,14                        |
| Monocarboxylate transporter 4                                                                        | O15427 MOT4_HUMAN   | <b>1,41</b><br>1,16        | 0,92<br>0,94               | 1,00        |                            |                            |                            |                            |                            |                             |
| MOSC domain-containing protein 1, mitochondrial precursor                                            | Q5VT66 MOSC1_HUMAN  | 0,98                       | 1,04                       |             |                            |                            |                            |                            |                            |                             |
| Motile sperm domain-containing protein 2                                                             | Q8NHP6 MSPD2_HUMAN  | 0,95<br>0,95               | 1,02<br>1,06               | 1,03        |                            |                            |                            |                            |                            |                             |
| M-phase phosphoprotein 6                                                                             | Q99547 MPH6_HUMAN   |                            |                            |             |                            |                            |                            | 1,01<br>1,17               | 0,27<br>0,50               | 0,08<br><b>0,39</b>         |
| Mps one binder kinase activator-like 1B                                                              | Q9H8S9 MOL1B_HUMAN  |                            |                            |             | 0,00                       | 0,00                       | 0,00                       |                            |                            |                             |
| Mps one binder kinase activator-like 2A                                                              | Q96BX8 MOL2A_HUMAN  |                            |                            |             | 0,84                       | 0,63                       | 0,74                       |                            |                            |                             |
| MPST protein (Fragment)                                                                              | Q6FHN9 Q6FHN9_HUMAN | 0,96<br>1,07               | 1,00<br>0,90               | 1,09        | 0,00                       | 0,00                       | 0,00                       |                            |                            |                             |
| MRNA encoding beta-tubulin, (Fragment)                                                               | Q6LC01 Q6LC01_HUMAN | 1,10                       | 1,71                       |             |                            |                            |                            | 0,89                       | <b>2,95</b>                | <b>3,13</b>                 |
| MRPL3 protein                                                                                        | Q6IBT2 Q6IBT2_HUMAN | 1,17<br>0,95               | 1,20<br>0,96               | 1,29        |                            |                            |                            |                            |                            |                             |
| MRPL47 protein                                                                                       | Q8N5D1 Q8N5D1_HUMAN | 1,02                       | 1,08                       |             |                            |                            |                            |                            |                            |                             |
| MTCH1 protein (Fragment)                                                                             | A4FVA6 A4FVA6_HUMAN | 1,22                       | 1,20                       | 1,38        |                            |                            |                            |                            |                            |                             |
| MTCH1 protein (Fragment)                                                                             | Q8IW90 Q8IW90_HUMAN | 0,90                       | <b>0,88</b>                |             |                            |                            |                            | 0,00                       | 0,00                       | 0,00                        |
| Multidrug resistance-associated protein 1                                                            | P33527 MRP1_HUMAN   | 1,03                       | 0,96                       |             |                            |                            |                            |                            |                            |                             |
| Multifunctional protein ADE2                                                                         | P22234 PUR6_HUMAN   |                            |                            |             | <b>0,73</b>                | <b>0,83</b>                | <b>0,58</b>                |                            |                            |                             |
| Multisynthetase complex auxiliary component p38                                                      | Q13155 MCA2_HUMAN   |                            |                            |             | <b>0,83</b><br>0,79        | 0,79<br>0,97               | 0,82<br>0,75               |                            |                            |                             |
| Multisynthetase complex auxiliary component p43                                                      | Q12904 MCA1_HUMAN   |                            |                            |             | 1,09<br>0,65               | 0,82<br>1,03               | 0,61<br>0,61               |                            |                            |                             |
| Muscleblind-like protein 1                                                                           | Q9NR56 MBNL1_HUMAN  |                            |                            |             | <b>1,96</b><br>1,16        | <b>1,48</b><br>0,73        | <b>2,08</b><br><b>1,59</b> | <b>1,25</b>                | <b>1,33</b>                | <b>1,20</b>                 |
| Myb-binding protein 1A                                                                               | Q9BQG0 MBB1A_HUMAN  |                            |                            |             |                            |                            |                            | 0,00<br><b>0,20</b>        | 0,00<br><b>0,40</b>        | 0,00<br>0,36                |
| Myc box-dependent-interacting protein 1                                                              | O00499 BIN1_HUMAN   |                            |                            |             | 0,83<br>0,82               | 0,64<br>1,03               | 0,94<br>1,59               |                            |                            |                             |
| Myeloid cell nuclear differentiation antigen                                                         | Q5VUU6 Q5VUU6_HUMAN | <b>1,27</b><br>0,99        | <b>1,68</b><br>1,05        | <b>2,31</b> | <b>1,17</b><br>1,26        | 1,11<br>1,57               | 0,90<br>1,11               | <b>1,11</b><br><b>0,81</b> | <b>0,57</b><br><b>0,76</b> | <b>0,45</b><br><b>0,66</b>  |
| Myeloid cell surface CD33 precursor                                                                  | P20138 CD33_HUMAN   | 1,42<br>1,17               | 1,01<br>0,77               | 0,86        |                            |                            |                            |                            |                            |                             |
| Myeloid-associated differentiation marker                                                            | Q96S97 MYADM_HUMAN  | 1,09<br>1,05               | 1,14<br><b>1,55</b>        | <b>1,17</b> |                            |                            |                            |                            |                            |                             |
| Myeloperoxidase precursor                                                                            | P05164 PERM_HUMAN   | <b>0,90</b>                | 0,94                       |             |                            |                            |                            |                            |                            |                             |
| MYO1C variant protein (Fragment)                                                                     | Q4LE56 Q4LE56_HUMAN | 1,39<br><b>1,14</b>        | 1,33<br>1,05               | 1,60        |                            |                            |                            |                            |                            |                             |
| MYO1G variant protein                                                                                | B01T2 B01T2_HUMAN   | 1,20<br>1,11               | 0,89<br>0,88               | 0,97        |                            |                            |                            |                            |                            |                             |
| MYO9B variant protein                                                                                | B01T6 B01T6_HUMAN   |                            |                            |             | 0,68                       | 0,55                       | 0,17                       |                            |                            |                             |
| Myoferlin                                                                                            | Q9NZM1 MYOF_HUMAN   | <b>1,13</b><br><b>0,95</b> | <b>0,95</b><br>0,98        | 1,01        | 9999,00<br>2,44            | 0,55<br>1,89               | 9999,00<br>2,54            | 1,40<br><b>0,55</b>        | <b>4,04</b><br><b>3,62</b> | <b>11,25</b><br><b>5,08</b> |
| Myosin IE                                                                                            | Q4KMR3 Q4KMR3_HUMAN |                            |                            |             | 0,73                       | 0,70                       | 0,60                       |                            |                            |                             |
| Myosin regulatory light chain                                                                        | Q53X45 Q53X45_HUMAN | 1,09<br>1,09               | 1,07<br><b>1,55</b>        | <b>1,91</b> | 0,93                       | <b>0,85</b>                | <b>1,16</b>                | <b>3,10</b><br><b>1,78</b> | <b>5,41</b><br><b>7,05</b> | <b>4,65</b><br><b>6,56</b>  |
| Myosin regulatory light chain MRCL3 variant (Fragment)                                               | Q53HL1 Q53HL1_HUMAN |                            |                            |             | <b>0,78</b><br><b>0,86</b> | <b>0,72</b><br><b>0,88</b> | <b>0,72</b><br>1,07        | <b>1,84</b><br><b>1,33</b> | <b>2,64</b><br><b>2,95</b> | <b>2,64</b><br><b>3,06</b>  |
| Myosin, light chain 6, alkali, smooth muscle and non-muscle                                          | Q561V9 Q561V9_HUMAN | 1,02<br><b>1,34</b>        | <b>1,19</b><br><b>1,47</b> | <b>2,06</b> | 0,66<br><b>0,66</b>        | <b>0,80</b><br><b>0,80</b> | <b>0,80</b><br><b>0,80</b> | <b>1,33</b>                | <b>2,95</b>                | <b>3,06</b>                 |
| Myosin-Ic                                                                                            | Q94832 MYO1D_HUMAN  | 1,07<br><b>1,39</b>        | 0,99<br><b>1,69</b>        | <b>2,72</b> |                            |                            |                            |                            |                            |                             |
| Myosin-II                                                                                            | O00160 MYO1F_HUMAN  |                            |                            |             | <b>1,52</b><br>1,49        | <b>1,27</b><br>0,90        | 1,27<br>1,49               |                            |                            |                             |
| Myosin-Ixb                                                                                           | Q13459 MYO9B_HUMAN  |                            |                            |             |                            |                            |                            |                            |                            |                             |
| Myosin-Va                                                                                            | Q9Y411 MYO5A_HUMAN  | 0,00<br>1,01               | 0,00<br>0,79               | 0,00        |                            |                            |                            |                            |                            |                             |
| Myotrophin                                                                                           | P58546 MPTN_HUMAN   |                            |                            |             | 1,06<br>0,68               | 1,10<br><b>0,78</b>        | 1,07<br>0,74               |                            |                            |                             |
| Myristoylated alanine-rich C-kinase substrate                                                        | P29966 MARCS_HUMAN  | 1,19                       | 1,28                       |             | 1,21<br>1,04               | 1,18<br>1,11               | 1,35<br>1,20               |                            |                            |                             |
| N(4)-(beta-N-acetylglucosaminy)-L-asparaginase precursor                                             | P20933 ASPG_HUMAN   | 0,97                       | 0,92                       |             |                            |                            |                            |                            |                            |                             |
| Na+/K+ transporting ATPase beta 3 polypeptide (Fragment)                                             | Q58118 Q58118_HUMAN |                            |                            |             | 0,83                       | 0,71                       | 0,84                       |                            |                            |                             |
| N-acylethanolamine-hydrolyzing acid amidase precursor                                                | Q02083 ASAH_L_HUMAN | 1,01                       | 0,93                       |             |                            |                            |                            |                            |                            |                             |
| N-acetylglactosamine-6-sulfatase precursor                                                           | P34059 GALNS_HUMAN  | 1,09<br>1,04               | 1,12<br>0,91               | 1,05        |                            |                            |                            |                            |                            |                             |
| N-acetylglactosaminyltransferase 7                                                                   | Q86SF2 GALT7_HUMAN  | 1,12<br>1,01               | <b>0,64</b><br>0,84        | <b>0,64</b> |                            |                            |                            |                            |                            |                             |
| N-acetylglucosamine kinase                                                                           | Q9UJ70 NAGK_HUMAN   |                            |                            |             | <b>0,79</b><br>1,03        | 0,89<br>1,09               | 0,84<br>1,43               |                            |                            |                             |
| N-acetylglucosamine-1-phosphodiester alpha-N-acetylglucosaminidase precursor                         | Q9UK23 NAGPA_HUMAN  | 0,00<br>1,09               | 0,00<br><b>0,79</b>        | 0,00        |                            |                            |                            |                            |                            |                             |
| N-acetylglucosamine-1-phosphotransferase subunit gamma precursor                                     | Q9UJJ9 GNPTG_HUMAN  | 0,95                       | <b>0,51</b>                | 0,67        |                            |                            |                            |                            |                            |                             |
| N-acetylglucosamine-1-phosphotransferase subunits alpha/beta precursor                               | Q3T906 GNPTA_HUMAN  | 1,00<br><b>1,11</b>        | <b>0,70</b><br>0,94        | 0,79        |                            |                            |                            |                            |                            |                             |
| N-acetylglucosamine-6-sulfatase precursor                                                            | P15586 GNS_HUMAN    | 1,07<br>0,94               | 1,17<br><b>0,86</b>        | 0,97        | <b>1,40</b><br><b>1,56</b> | 0,96<br>1,02               | <b>1,38</b><br>1,08        |                            |                            |                             |
| N-acylethanolamine-hydrolyzing acid amidase precursor                                                | Q02083 ASAH_L_HUMAN | 1,08                       | 1,05                       | 0,89        |                            |                            |                            |                            |                            |                             |
| N-acyleuraminatase cytidyltransferase                                                                | Q8NFW8 NEUA_HUMAN   |                            |                            |             | 1,92<br>1,70               | <b>2,05</b><br>0,89        | 2,17<br>1,15               | 0,00<br>0,39               | 0,00<br><b>0,47</b>        | 0,00<br><b>0,40</b>         |
| N-acylsphingosine amidohydrolase (Acid ceramidase) 1 preproprotein isoform a variant (Fragment)      | Q53H01 Q53H01_HUMAN |                            |                            |             |                            |                            |                            |                            |                            |                             |
| NACHT, LRR and PYD domains-containing protein 6                                                      | P59044 NALP6_HUMAN  | 0,00                       | 0,00                       |             |                            |                            |                            |                            |                            |                             |
| NAD-dependent deacetylase sirtuin-5                                                                  | Q9NXA8 SIRT5_HUMAN  | 0,98                       | 1,19                       |             |                            |                            |                            |                            |                            |                             |
| NAD-dependent malic enzyme, mitochondrial precursor                                                  | P23368 MAOM_HUMAN   | <b>0,88</b><br>1,02        | <b>0,80</b><br>1,01        | <b>0,63</b> | 2,69                       | 2,24                       | <b>3,66</b>                |                            |                            |                             |
| NADH dehydrogenase                                                                                   | Q549M5 Q549M5_HUMAN | 0,98                       | 0,98                       |             |                            |                            |                            | 1,11                       | <b>1,17</b>                | <b>1,77</b>                 |
| NADH dehydrogenase (Ubiquinone) 1 beta subcomplex, 8, 19kDa                                          | Q5W145 Q5W145_HUMAN |                            |                            |             |                            |                            |                            | 1,22                       | 1,20                       | 2,54                        |
| NADH dehydrogenase (Ubiquinone) flavoprotein 2, 24kDa                                                | Q6IPW4 Q6IPW4_HUMAN | 0,94                       | 0,96                       |             |                            |                            |                            |                            |                            |                             |
| NADH dehydrogenase (Ubiquinone) Fe-S protein 2, 49kDa                                                | Q5VTW0 Q5VTW0_HUMAN | 1,01<br><b>0,79</b>        | 0,95<br><b>0,75</b>        | 0,85        |                            |                            |                            |                            |                            |                             |
| NADH dehydrogenase (Ubiquinone) Fe-S protein 3, 30kDa (NADH-coenzyme Q reductase) variant (Fragment) | Q53FM7 Q53FM7_HUMAN | 0,93                       | 1,04                       | 0,94        |                            |                            |                            | 0,00<br><b>1,73</b>        | 0,00<br>1,17               | 0,00<br><b>1,96</b>         |
| NADH dehydrogenase (Ubiquinone) Fe-S protein 8, 23kDa (NADH-coenzyme Q reductase) variant (Fragment) | Q53G17 Q53G17_HUMAN |                            |                            |             |                            |                            |                            | 1,05                       | 1,07                       | 1,60                        |

|                                                                                        |                     |                            |                             |              |                            |                     |                            |                     |                             |                             |
|----------------------------------------------------------------------------------------|---------------------|----------------------------|-----------------------------|--------------|----------------------------|---------------------|----------------------------|---------------------|-----------------------------|-----------------------------|
| NADH dehydrogenase (Ubiquinone) flavoprotein 3, 10kDa                                  | Q8WU60 Q8WU60_HUMAN | 0,78<br>1,00               | <b>0,75</b><br><b>0,88</b>  | <b>0,69</b>  |                            |                     |                            | 0,99<br><b>1,81</b> | 1,17<br><b>2,28</b>         | <b>1,57</b><br><b>4,85</b>  |
| NADH dehydrogenase [ubiquinone] 1 alpha subcomplex subunit 10, mitochondrial precursor | O95299 NDUAA_HUMAN  | 0,87                       | <b>0,90</b>                 |              |                            |                     |                            |                     |                             |                             |
| NADH dehydrogenase [ubiquinone] 1 alpha subcomplex subunit 12                          | Q9UI09 NDUAC_HUMAN  | 0,77<br>1,05               | <b>0,79</b><br>0,93         | <b>0,72</b>  |                            |                     |                            | 0,94<br>0,00        | 0,97<br>0,00                | <b>1,57</b><br>0,00         |
| NADH dehydrogenase [ubiquinone] 1 alpha subcomplex subunit 13                          | Q9P0J0 NDUAD_HUMAN  | 0,90<br>0,98               | <b>0,76</b><br>0,97         | <b>0,72</b>  |                            |                     |                            | 0,96                | 1,00                        | <b>1,27</b>                 |
| NADH dehydrogenase [ubiquinone] 1 alpha subcomplex subunit 2                           | O43678 NDUA2_HUMAN  | 0,95<br>0,98               | <b>0,73</b><br>0,96         | <b>0,68</b>  |                            |                     |                            | 1,16<br>1,93        | 0,90<br>1,09                | 1,60<br>2,22                |
| NADH dehydrogenase [ubiquinone] 1 alpha subcomplex subunit 4                           | O00483 NDUA4_HUMAN  | 0,90<br>1,09               | <b>0,70</b><br>0,96         | <b>0,51</b>  |                            |                     |                            | <b>1,71</b>         | 0,90                        | <b>2,14</b>                 |
| NADH dehydrogenase [ubiquinone] 1 alpha subcomplex subunit 5                           | Q16718 NDUA5_HUMAN  | 1,01                       | 0,99                        |              |                            |                     |                            | <b>1,99</b>         | <b>1,72</b>                 | <b>2,97</b>                 |
| NADH dehydrogenase [ubiquinone] 1 alpha subcomplex subunit 8                           | P51970 NDUA8_HUMAN  | 1,00<br><b>0,91</b>        | <b>0,72</b><br>1,03         | <b>0,72</b>  |                            |                     |                            |                     |                             |                             |
| NADH dehydrogenase [ubiquinone] 1 alpha subcomplex subunit 9, mitochondrial precursor  | Q16795 NDUA9_HUMAN  | 0,90<br>0,98               | <b>0,76</b><br>0,96         | 0,78         |                            |                     |                            |                     |                             |                             |
| NADH dehydrogenase [ubiquinone] 1 beta subcomplex subunit 1                            | O75438 NDUB1_HUMAN  | <b>1,10</b>                | <b>1,11</b>                 |              |                            |                     |                            |                     |                             |                             |
| NADH dehydrogenase [ubiquinone] 1 beta subcomplex subunit 10                           | O96000 NDUBA_HUMAN  | 0,68<br>1,01               | 0,72<br>0,98                | 0,50         |                            |                     |                            | 0,92<br>1,80        | 1,17<br>1,68                | <b>1,63</b><br><b>3,18</b>  |
| NADH dehydrogenase [ubiquinone] 1 beta subcomplex subunit 11, mitochondrial precursor  | Q9NX14 NDUBB_HUMAN  | 0,00                       | 0,00                        | 0,00         | 0,00                       | 0,00                | 0,00                       |                     |                             |                             |
| NADH dehydrogenase [ubiquinone] 1 beta subcomplex subunit 2, mitochondrial precursor   | O95178 NDUB2_HUMAN  | 1,05                       | 0,69                        | 0,64         |                            |                     |                            |                     |                             |                             |
| NADH dehydrogenase [ubiquinone] 1 beta subcomplex subunit 4                            | O95168 NDUB4_HUMAN  | 1,01<br>1,03               | 0,92<br>0,96                | 0,82         |                            |                     |                            | 1,27                | 1,23                        | 1,39                        |
| NADH dehydrogenase [ubiquinone] 1 beta subcomplex subunit 6                            | Q49SH3 Q49SH3_HUMAN | 1,04                       | 0,99                        | <b>0,74</b>  |                            |                     |                            | 1,11                | <b>1,58</b>                 | <b>2,10</b>                 |
| NADH dehydrogenase [ubiquinone] 1 beta subcomplex subunit 5, mitochondrial precursor   | O43674 NDUB5_HUMAN  |                            | <b>0,86</b>                 | 1,00         |                            |                     |                            |                     |                             |                             |
| NADH dehydrogenase [ubiquinone] 1 beta subcomplex subunit 6                            | O95139 NDUB6_HUMAN  | 1,03                       | 1,03                        |              |                            |                     |                            | <b>1,71</b>         | <b>2,17</b>                 | <b>3,40</b>                 |
| NADH dehydrogenase [ubiquinone] 1 beta subcomplex subunit 8, mitochondrial precursor   | O95169 NDUB8_HUMAN  | 0,93<br><b>1,21</b>        | 0,81<br>1,05                | 0,83         |                            |                     |                            | 1,08                | 0,85                        | 1,33                        |
| NADH dehydrogenase [ubiquinone] 1 beta subcomplex subunit 9                            | Q9Y6M9 NDUB9_HUMAN  | 0,78<br>1,04               | <b>0,67</b><br><b>0,84</b>  | <b>0,62</b>  |                            |                     |                            | 0,00                | 0,00                        | 0,00                        |
| NADH dehydrogenase [ubiquinone] iron-sulfur protein 3, mitochondrial precursor         | O75489 NDUS3_HUMAN  | 1,07                       | 0,88                        |              |                            |                     |                            |                     |                             |                             |
| NADH dehydrogenase [ubiquinone] iron-sulfur protein 4, mitochondrial precursor         | O43181 NDUS4_HUMAN  | 0,92<br>0,94               | 1,02<br>0,89                | 0,84         |                            |                     |                            | 0,83<br><b>2,15</b> | <b>1,18</b><br>1,51         | 1,51<br><b>3,33</b>         |
| NADH:ubiquinone oxidoreductase PSST subunit                                            | Q7LD69 Q7LD69_HUMAN | 0,97                       | 0,97                        |              |                            |                     |                            |                     |                             |                             |
| NADH-cytochrome b5 reductase 1                                                         | Q9UHQ9 NB5R1_HUMAN  | 0,95<br>1,06               | 1,02<br>1,00                | 0,92         |                            |                     |                            | 1,17<br>0,00        | 1,00<br>0,00                | 1,14<br>0,00                |
| NADH-cytochrome b5 reductase 3                                                         | P00387 NB5R3_HUMAN  | 1,02<br>0,98               | 0,94<br>1,05                | 0,99         | 1,12                       | 1,11                | 1,01                       | 1,65<br>0,00        | 2,76<br>0,00                | 4,91<br>0,00                |
| NADH-ubiquinone oxidoreductase 75 kDa subunit, mitochondrial precursor                 | P28331 NDUS1_HUMAN  | 0,92<br><b>0,88</b>        | 0,87<br><b>0,83</b>         | <b>0,80</b>  |                            |                     |                            |                     |                             |                             |
| NADH-ubiquinone oxidoreductase chain 3                                                 | A4ZN04 A4ZN04_HUMAN | 0,00                       | 0,00                        |              |                            |                     |                            |                     |                             |                             |
| NADH-ubiquinone oxidoreductase chain 4                                                 | Q305G4 Q305G4_HUMAN | 1,05                       | 1,22                        | 0,84         |                            |                     |                            |                     |                             |                             |
| NADP-dependent malic enzyme                                                            | P48163 MAOX_HUMAN   |                            |                             |              | 1,02<br>0,98               | 0,91<br>1,21        | 1,04<br>1,18               |                     |                             |                             |
| Nascent polypeptide-associated complex subunit alpha                                   | Q13765 NACA_HUMAN   |                            |                             |              | 0,00                       | 0,00                | 0,00                       | 0,00                | 0,00                        | 0,00                        |
| NCF4 protein                                                                           | Q6FGM9 Q6FGM9_HUMAN |                            |                             |              | 0,62                       | <b>0,60</b>         | 0,64                       |                     |                             |                             |
| NCK-associated protein 1-like                                                          | Q52LW0 Q52LW0_HUMAN |                            |                             |              |                            |                     |                            | 1,00                | 0,92                        | 0,89                        |
| NDUFA3 protein                                                                         | Q6FGG4 Q6FGG4_HUMAN | 1,03<br>0,88               | <b>0,73</b><br>0,89         | <b>0,64</b>  |                            |                     |                            |                     |                             |                             |
| NDUFA6 protein (Fragment)                                                              | Q6FGW0 Q6FGW0_HUMAN | 0,86<br>1,05               | 0,88<br>0,95                | <b>0,64</b>  |                            |                     |                            |                     |                             |                             |
| NDUFA7 protein                                                                         | Q6IB89 Q6IB89_HUMAN |                            |                             |              |                            |                     |                            | <b>2,15</b>         | 1,61                        | <b>2,85</b>                 |
| NDUFA7 protein (Fragment)                                                              | P52815 RM12_HUMAN   |                            |                             |              |                            |                     |                            | <b>1,29</b>         | <b>1,24</b>                 | <b>1,82</b>                 |
| NDUFA7 protein (Fragment)                                                              | Q32Q14 Q32Q14_HUMAN | 1,09                       | 1,00                        |              |                            |                     |                            |                     |                             |                             |
| NDUFB3 protein                                                                         | Q6IB80 Q6IB80_HUMAN | 1,08<br>1,05               | <b>0,77</b><br>0,93         | 0,70         |                            |                     |                            | 0,94<br><b>3,94</b> | 1,17<br>1,25                | <b>1,60</b><br><b>3,36</b>  |
| NDUFB5 protein                                                                         | Q68DI0 Q68DI0_HUMAN | 0,93                       | 0,96                        | 0,80         |                            |                     |                            | 1,04<br><b>3,75</b> | <b>1,89</b><br>1,40         | <b>2,11</b><br><b>3,97</b>  |
| NDUFB7 protein (Fragment)                                                              | Q6ICN9 Q6ICN9_HUMAN | 0,86<br>1,03               | <b>0,67</b><br>1,07         | <b>0,62</b>  |                            |                     |                            | 0,90                | <b>0,55</b>                 | 0,77                        |
| NDUFC2 protein                                                                         | Q6FIH8 Q6FIH8_HUMAN | 0,99                       | 1,05                        | 0,82         |                            |                     |                            |                     |                             |                             |
| NDUFS5 protein                                                                         | Q6ICQ4 Q6ICQ4_HUMAN | 0,86                       | <b>0,68</b>                 | <b>0,71</b>  |                            |                     |                            | 1,18                | 1,27                        | <b>1,92</b>                 |
| NDUFS5 protein                                                                         | Q6IBA0 Q6IBA0_HUMAN | 0,85                       | 0,98                        |              |                            |                     |                            |                     |                             |                             |
| NDUFS6 protein                                                                         | Q6IBC4 Q6IBC4_HUMAN | 1,09<br>0,99               | 1,03<br><b>0,86</b>         | 0,99         |                            |                     |                            | 0,85                | 0,89                        | 1,18                        |
| NDUFV1 protein                                                                         | Q6IBR3 Q6IBR3_HUMAN | 1,00<br>0,96               | 0,93<br>1,00                | 0,79         |                            |                     |                            |                     |                             |                             |
| NEDD8 precursor                                                                        | Q15843 NEDD8_HUMAN  |                            |                             |              | 0,82<br>0,00               | 0,88<br>0,00        | 0,89<br>0,00               |                     |                             |                             |
| NEDD8-activating enzyme E1 regulatory subunit                                          | Q13564 ULA1_HUMAN   |                            |                             |              |                            |                     |                            |                     |                             |                             |
| NEDD8-conjugating enzyme Ubc12                                                         | P61081 UBC12_HUMAN  |                            |                             |              | <b>0,60</b>                | 0,81                | 0,41                       |                     |                             |                             |
| NEDD9-interacting protein with calponin homology and LIM domains                       | Q8TDZ2 MICA1_HUMAN  |                            |                             |              | 1,03                       | 1,99                | 1,29                       |                     |                             |                             |
| Neighbor of COX4                                                                       | Q53Y03 Q53Y03_HUMAN | 1,02                       | 1,19                        |              |                            |                     |                            | 1,44<br>0,68        | <b>2,51</b><br>1,88         | <b>3,75</b><br>2,83         |
| Nesprin-1                                                                              | Q8NF91 SYNE1_HUMAN  | 1,10                       | <b>1,19</b>                 |              | 1,11                       | 1,01                | 0,94                       |                     |                             |                             |
| Nestin                                                                                 | P48681 NEST_HUMAN   |                            |                             |              | <b>1,68</b><br><b>1,91</b> | <b>1,49</b><br>1,60 | <b>1,59</b><br><b>1,90</b> |                     |                             |                             |
| Neurabin-2                                                                             | Q96SB3 NEB2_HUMAN   |                            |                             |              |                            |                     |                            | 0,87<br>1,11        | 0,88<br>0,40                | 0,58<br>0,87                |
| Neuraminidase                                                                          | P03483 NRAM_I72A2   | <b>5,47</b><br><b>1,84</b> | <b>11,93</b><br><b>5,34</b> | <b>10,54</b> | <b>3,04</b>                | <b>6,44</b>         | 8,86                       | <b>9,93</b>         | <b>3,86</b><br><b>12,07</b> | <b>7,23</b><br><b>12,89</b> |
| Neuroblast differentiation-associated protein AHNK                                     | Q09666 AHNK_HUMAN   | <b>1,70</b><br>1,91        | <b>1,18</b><br><b>1,33</b>  | <b>1,82</b>  | <b>1,64</b><br>1,16        | <b>1,07</b><br>0,93 | 0,97<br>0,86               | <b>1,30</b><br>1,75 | <b>0,49</b><br><b>0,94</b>  | <b>0,44</b><br><b>1,13</b>  |
| Neurofilament, medium polypeptide 150kDa                                               | Q4QRK6 Q4QRK6_HUMAN |                            |                             |              |                            |                     |                            | 1,26                | 0,88                        | 0,66                        |
| Neurogranin                                                                            | Q92686 NEUG_HUMAN   |                            |                             |              | <b>0,73</b><br>0,65        | 0,78<br>0,51        | <b>0,42</b><br>0,17        |                     |                             |                             |
| Neurolysin, mitochondrial precursor                                                    | Q9BYT8 NEUL_HUMAN   | <b>0,80</b><br>0,95        | 0,60<br>0,88                | <b>0,37</b>  |                            |                     |                            |                     |                             |                             |
| Neuronal protein                                                                       | Q7Z4X2 Q7Z4X2_HUMAN | 1,05                       | 0,86                        |              |                            |                     |                            | 1,74                | <b>1,90</b>                 | 2,36                        |
| Neuropathy target esterase                                                             | Q8IY17 PLPL6_HUMAN  | 1,11<br>1,07               | 1,10<br><b>1,34</b>         | 1,16         |                            |                     |                            | 0,99                | 1,39                        | 1,55                        |
| Neuropilin 1                                                                           | Q577F3 Q577F3_HUMAN | 1,07                       | <b>0,80</b>                 | 0,90         |                            |                     |                            |                     |                             |                             |

|                                                                  |                     |             |             |             |             |              |             |              |              |             |
|------------------------------------------------------------------|---------------------|-------------|-------------|-------------|-------------|--------------|-------------|--------------|--------------|-------------|
|                                                                  |                     | 1,17        | 0,90        |             |             |              |             |              |              |             |
| Neuroplastin precursor                                           | Q9Y639 NPTN_HUMAN   | 1,09        | 0,88        | 0,93        |             |              |             |              |              | 8,56        |
| Neutral alpha-glucosidase AB precursor                           | Q14697 GANAB_HUMAN  | <b>1,13</b> | <b>1,15</b> | <b>1,13</b> | <b>1,89</b> | 1,30         | <b>2,29</b> |              | 0,00         | 0,00        |
| Neutral amino acid transporter                                   | Q71UA6 Q71UA6_HUMAN | 1,26        | 1,22        | <b>1,33</b> | <b>2,49</b> | <b>1,57</b>  | <b>2,37</b> |              |              |             |
| Neutrophil cytosol factor 2                                      | P19878 NCF2_HUMAN   | 1,03        | <b>4,08</b> | <b>8,80</b> | 0,88        | <b>0,80</b>  | <b>0,52</b> |              |              |             |
| Neutrophil cytosol factor 2 variant (Fragment)                   | Q59F14 Q59F14_HUMAN |             |             |             | <b>0,86</b> | 0,77         | <b>0,49</b> |              |              |             |
| Neutrophil cytosolic factor 3; NCF-3 (Fragments)                 | Q9UDI2 Q9UDI2_HUMAN | 0,00        | 0,00        |             |             |              |             |              |              |             |
| NHP2L1 protein                                                   | Q6FHM6 Q6FHM6_HUMAN | 0,00        | 0,00        | 0,00        |             |              |             | 0,96         | <b>0,80</b>  | <b>0,45</b> |
| Nicalin precursor                                                | Q969V3 NCLN_HUMAN   | 1,01        | 1,04        | 1,01        |             |              |             | 0,96         | <b>0,73</b>  | <b>0,65</b> |
| Nicastrin precursor                                              | Q92542 NICA_HUMAN   | <b>0,80</b> | 0,97        |             |             |              |             | 0,90         | <b>3,58</b>  | <b>6,86</b> |
| Nicotinamide nucleotide transhydrogenase                         | Q2TB59 Q2TB59_HUMAN | <b>0,71</b> | 0,79        | 0,86        |             |              |             |              |              |             |
| Nicotinate phosphoribosyltransferase                             | Q6XQN6 PNCB_HUMAN   | 0,94        | 0,95        |             |             |              |             |              |              |             |
| Niemann-Pick disease, type C1 variant (Fragment)                 | Q2TB59 Q2TB59_HUMAN | 0,99        | <b>0,91</b> | <b>0,83</b> | 1,14        | 1,12         | 1,13        |              |              |             |
| Niemann-Pick disease, type C2 variant (Fragment)                 | Q53HV6 Q53HV6_HUMAN | 0,97        | <b>0,94</b> |             | 0,00        | 0,00         | 0,00        |              |              |             |
| Nitrilase homolog 2                                              | Q9NQR4 NIT2_HUMAN   |             |             |             |             |              |             |              |              |             |
| NLR family member X1                                             | Q86UT6 NLRX1_HUMAN  | 1,02        | 1,02        |             | 0,90        | 1,07         | 0,99        |              |              |             |
| Nodal modulator 1 precursor                                      | Q86UT6 NLRX1_HUMAN  | 0,83        | 0,64        | 0,44        |             |              |             |              |              |             |
| Nodal modulator 2 precursor                                      | Q15155 NOMO1_HUMAN  |             |             |             |             |              |             | 1,02         | <b>2,42</b>  | <b>7,44</b> |
| Nodal modulator 3 precursor                                      | Q5JPE7 NOMO2_HUMAN  |             |             |             |             |              |             |              |              |             |
| NOGO-interacting mitochondrial protein                           | P69849 NOMO3_HUMAN  | 1,02        | 0,97        | 0,88        |             |              |             | 0,69         | <b>1,91</b>  | <b>2,89</b> |
| NOL1 protein                                                     | Q96RL8 Q96RL8_HUMAN | 0,95        | 1,10        |             |             |              |             |              |              |             |
| Non-histone chromosomal protein HMG-14                           | Q3KQS4 Q3KQS4_HUMAN | 0,82        | 0,81        |             |             |              |             |              |              |             |
| Non-histone chromosomal protein HMG-17                           | P05114 HMGN1_HUMAN  |             |             |             | 0,85        | <b>0,62</b>  | <b>0,42</b> | 0,85         | <b>0,62</b>  | <b>0,42</b> |
| Non-muscle myosin heavy polypeptide 9                            | P05204 HMGN2_HUMAN  |             |             |             | 1,11        | 1,12         | <b>1,36</b> | 1,05         | <b>0,45</b>  | <b>0,35</b> |
| Non-structural protein 1                                         | Q60FE2 Q60FE2_HUMAN | 1,00        | <b>1,15</b> | <b>1,75</b> | 0,53        | 2,35         | 2,70        | <b>1,24</b>  | 1,06         | 1,07        |
| Normal mucosa of esophagus-specific gene 1 protein               | P03495 NS1_I72A2    | <b>1,20</b> | 1,64        |             | 0,88        | 3,41         | <b>4,18</b> | 0,78         | <b>0,28</b>  | <b>0,23</b> |
| Novel enoyl-CoA hydratase/isomerase family protein (Fragment)    | Q5JTA8 Q5JTA8_HUMAN | <b>1,96</b> | <b>7,36</b> | <b>9,43</b> | 1,11        | 1,12         | <b>1,36</b> | <b>2,54</b>  | <b>6,30</b>  | <b>7,50</b> |
| Novel protein similar to ATP synthase                            | Q5VTU8 Q5VTU8_HUMAN | <b>1,69</b> | <b>5,84</b> |             | 1,26        | 1,44         | 1,76        | <b>0,63</b>  | 5,18         | 4,52        |
| Novel protein similar to prothymosin alpha PTMA                  | Q5VYG3 Q5VYG3_HUMAN | 0,97        | 1,06        | 0,71        | <b>3,16</b> | <b>10,23</b> | <b>6,47</b> | <b>18,22</b> | <b>10,22</b> | <b>3,71</b> |
| Novel protein similar to ribosomal protein 26 RPS26              | Q5JVH5 Q5JVH5_HUMAN | 0,97        | 0,92        |             | 2,70        | 7,25         | 4,22        | <b>10,96</b> | <b>3,70</b>  | <b>3,28</b> |
| Novel protein similar to ribosomal protein L29 RPL29 (Fragment)  | Q5T1D1 Q5T1D1_HUMAN | 0,00        | 0,00        |             |             |              |             |              |              |             |
| NS5ATP1                                                          | Q546Z2 Q546Z2_HUMAN | 0,97        | 0,92        | <b>0,67</b> | 1,01        | 0,96         | 1,06        |              |              |             |
| NSFL1 cofactor p47                                               | Q9UNZ2 NSF1C_HUMAN  | 1,06        | 0,98        |             | 1,71        | 1,36         | 1,43        |              |              |             |
| NSFL1 (P97) cofactor                                             | Q5JXA4 Q5JXA4_HUMAN |             |             |             | 0,71        | 0,79         | 0,66        |              |              |             |
| N-terminal acetyltransferase complex ARD1 subunit homolog A      | P41227 ARD1A_HUMAN  |             |             |             | 0,00        | 0,00         | 0,00        |              |              |             |
| Nuclear cap-binding protein subunit 2                            | P52298 NCBP2_HUMAN  |             |             |             | 0,73        | 0,91         | 0,90        |              |              |             |
| Nuclear export protein                                           | Q0A2H1 NEP_I59A0    |             |             |             |             |              |             | 0,81         | <b>0,48</b>  | <b>0,23</b> |
| Nuclear export protein                                           | P69258 NEP_I72A2    | 1,65        | 3,73        | 3,89        | 0,89        | 0,68         | <b>0,38</b> |              |              |             |
| Nuclear fragile X mental retardation-interacting protein 2       | Q7Z417 NUFP2_HUMAN  |             |             |             | 88,55       | 46,43        |             |              |              |             |
| Nuclear migration protein nudC                                   | Q9Y266 NUDC_HUMAN   |             |             |             |             |              |             | <b>9,43</b>  | <b>6,24</b>  | <b>4,34</b> |
| Nuclear pore complex protein Nup205                              | Q92621 NU205_HUMAN  |             |             |             | 4,34        | <b>12,25</b> | <b>6,09</b> | 0,88         | 0,60         | 0,47        |
| Nuclear pore complex protein Nup88                               | Q99567 NUP88_HUMAN  |             |             |             |             |              |             |              |              |             |
| Nuclear pore complex protein Nup93                               | Q8N1F7 NUP93_HUMAN  |             |             |             |             |              |             | 1,36         | 1,21         | 2,12        |
| Nuclear pore complex protein Nup98-Nup96 precursor               | P52948 NUP98_HUMAN  |             |             |             |             |              |             | 0,40         | 0,91         | 0,84        |
| Nuclear pore glycoprotein p62                                    | P37198 NUP62_HUMAN  |             |             |             |             |              |             | <b>0,46</b>  | <b>0,72</b>  | <b>0,63</b> |
| Nuclear pore membrane glycoprotein 210 precursor                 | Q8TEM1 PO210_HUMAN  | 1,11        | 1,02        | 1,10        |             |              |             | 0,91         | <b>0,58</b>  | <b>0,38</b> |
| Nuclear protein Hcc-1                                            | P82979 HCC1_HUMAN   | <b>0,81</b> | <b>0,85</b> |             |             |              |             | <b>0,68</b>  | 1,14         | <b>0,72</b> |
| Nuclear protein localization protein 4 homolog                   | Q8TAT6 NPL4_HUMAN   |             |             |             |             |              |             | 0,83         | 1,24         | 0,72        |
| Nuclear protein NP60                                             | Q49A26 NP60_HUMAN   |             |             |             |             |              |             |              |              |             |
| Nuclear receptor coactivator 5                                   | Q9HCD5 NCOA5_HUMAN  |             |             |             |             |              |             |              |              |             |
| Nuclear transport factor 2                                       | P61970 NTF2_HUMAN   |             |             |             | 0,95        | 1,04         | 1,00        |              |              |             |
| Nuclear ubiquitous casein and cyclin-dependent kinases substrate | Q9H1E3 NUCKS_HUMAN  |             |             |             | <b>0,69</b> | 1,00         | 0,87        | 8,49         | 7,48         |             |
| Nuclease-sensitive element-binding protein 1                     | Q7KZ24 Q7KZ24_HUMAN |             |             |             | <b>0,41</b> | 0,94         | 0,86        | 10,22        | 12,00        |             |
| Nuclease-sensitive element-binding protein 1                     | P67809 YBOX1_HUMAN  |             |             |             | 0,00        | 0,00         | 0,00        | 0,99         | 1,26         | 1,15        |
| Nucleobindin 1 variant (Fragment)                                | Q53GX6 Q53GX6_HUMAN | 1,05        | 1,28        |             |             |              |             |              |              |             |
| Nucleobindin-2 precursor                                         | P80303 NUCB2_HUMAN  | 1,05        | <b>0,57</b> | <b>0,63</b> | 1,33        | 1,02         | <b>1,67</b> |              |              |             |
| Nucleolar and coiled-body phosphoprotein 1                       | Q9BUV3 Q9BUV3_HUMAN | <b>1,21</b> | <b>0,90</b> |             | <b>1,74</b> | 1,12         | 1,26        |              |              |             |
| Nucleolar complex protein 2 homolog                              | Q9Y3T9 NOC2L_HUMAN  |             |             |             |             |              |             | 0,93         | <b>0,55</b>  | <b>0,24</b> |
| Nucleolar complex protein 3 homolog                              | Q8WTT2 NOC3L_HUMAN  |             |             |             |             |              |             | <b>1,15</b>  | 1,06         | <b>0,73</b> |
|                                                                  |                     |             |             |             |             |              |             | 0,38         | 0,71         | 0,50        |
|                                                                  |                     |             |             |             |             |              |             | <b>0,72</b>  | 0,83         | 0,79        |

|                                                                  |                     |             |             |              |             |             |             |              |             |              |
|------------------------------------------------------------------|---------------------|-------------|-------------|--------------|-------------|-------------|-------------|--------------|-------------|--------------|
| Nucleolar protein 5                                              | Q9Y2X3 NOL5_HUMAN   | 0,00        | 0,00        | 0,00         |             |             |             | 0,66         | 0,46        | 0,46         |
|                                                                  |                     |             |             |              |             |             |             | <b>0,52</b>  | 0,59        | 0,45         |
| Nucleolar protein 5A                                             | O00567 NOL5A_HUMAN  |             |             |              |             |             |             | 0,90         | <b>0,63</b> | <b>0,51</b>  |
|                                                                  |                     |             |             |              |             |             |             | <b>0,49</b>  | <b>0,73</b> | <b>0,62</b>  |
| Nucleolar protein 6                                              | Q9H6R4 NOL6_HUMAN   |             |             |              |             |             |             | 0,22         | <b>0,41</b> | <b>0,34</b>  |
| Nucleolar RNA helicase 2                                         | Q9NR30 DDX21_HUMAN  |             |             |              |             |             |             | 0,91         | 0,69        | 0,87         |
|                                                                  |                     |             |             |              |             |             |             | <b>0,34</b>  | <b>0,62</b> | <b>0,57</b>  |
| Nucleolar transcription factor 1                                 | P17480 UBF1_HUMAN   |             |             |              |             |             |             | <b>0,83</b>  | <b>0,44</b> | <b>0,37</b>  |
| Nucleolin                                                        | P19338 NUCL_HUMAN   | 0,98        | 1,03        | <b>0,88</b>  | 1,14        | 1,42        | 1,19        | 1,03         | <b>0,41</b> | <b>0,26</b>  |
|                                                                  |                     | <b>1,49</b> | 1,15        |              | 1,01        | 1,38        | 1,07        | <b>1,49</b>  | <b>0,73</b> | <b>0,65</b>  |
| Nucleophosmin                                                    | P06748 NPM_HUMAN    | 1,03        | <b>1,16</b> | <b>1,92</b>  | 1,51        | <b>1,86</b> | 1,31        | <b>0,78</b>  | <b>0,47</b> | <b>0,32</b>  |
|                                                                  |                     | 1,04        | <b>1,30</b> |              | 1,31        | 1,99        | 1,48        | <b>0,89</b>  | <b>0,84</b> | <b>0,67</b>  |
| Nucleoporin 153kDa                                               | Q7Z743 Q7Z743_HUMAN |             |             |              |             |             |             | <b>0,52</b>  | 0,98        | <b>0,33</b>  |
| Nucleoporin 54kDa variant (Fragment)                             | Q53FD7 Q53FD7_HUMAN |             |             |              |             |             |             | 0,79         | 0,63        | 0,36         |
| Nucleoporin NUP53                                                | Q8NFH5 NUP53_HUMAN  |             |             |              |             |             |             | <b>0,58</b>  | 0,93        | <b>0,39</b>  |
| Nucleoporin-like protein RIP                                     | P52594 AGFG1_HUMAN  |             |             |              | 0,88        | 1,03        | <b>0,71</b> | 0,00         | 0,00        | 0,00         |
| Nucleoprotein                                                    | P06827 NCAP_I72A2   | <b>1,72</b> | <b>6,74</b> | <b>12,25</b> | <b>1,86</b> | <b>9,25</b> | <b>8,92</b> | <b>12,80</b> | <b>6,45</b> | <b>7,08</b>  |
|                                                                  |                     | <b>1,24</b> | <b>5,02</b> |              | 2,28        | 7,19        | 7,15        | <b>9,26</b>  | <b>7,71</b> | <b>10,10</b> |
| Nucleoside diphosphate kinase                                    | Q32Q12 Q32Q12_HUMAN | 0,72        | 1,36        | 1,84         | 0,85        | 0,83        | 0,82        | 0,79         | <b>1,63</b> | <b>1,70</b>  |
|                                                                  |                     | 2,24        | 2,18        |              |             | 0,89        | 0,85        | <b>0,82</b>  | <b>1,39</b> | <b>1,79</b>  |
| Nucleoside diphosphate kinase                                    | Q86XQ2 Q86XQ2_HUMAN |             |             |              | 0,00        | 0,00        | 0,00        |              |             |              |
|                                                                  |                     | 2,05        | 1,75        |              |             |             |             |              |             |              |
| Nucleoside diphosphate kinase (Fragment)                         | Q9NUF9 Q9NUF9_HUMAN | 1,19        | <b>1,13</b> | 1,77         |             |             |             |              |             |              |
|                                                                  |                     | 0,95        | 0,88        |              |             |             |             | 0,00         | 0,00        | 0,00         |
| Nucleoside diphosphate kinase (Fragment)                         | Q53HM5 Q53HM5_HUMAN |             |             |              |             |             |             |              |             |              |
|                                                                  |                     | 1,19        | 1,03        |              |             |             |             |              |             |              |
| Nucleoside diphosphate-linked moiety X motif 6                   | P53370 NUDT6_HUMAN  |             |             |              |             |             |             |              |             |              |
|                                                                  |                     | 0,90        | 0,81        |              |             |             |             |              |             |              |
| Nucleosome assembly protein 1-like 1                             | P55209 NP1L1_HUMAN  |             |             |              | <b>0,78</b> | <b>0,83</b> | 0,89        |              |             |              |
| Nucleosome assembly protein 1-like 4                             | Q99733 NP1L4_HUMAN  |             |             |              | 0,93        | 0,93        | 0,93        |              |             |              |
|                                                                  |                     |             |             |              | 0,66        | <b>0,74</b> | 0,80        |              |             |              |
| Nucleotide exchange factor SIL1 precursor                        | Q9H173 SIL1_HUMAN   | 0,97        | 0,70        | 0,50         |             |             |             |              |             |              |
|                                                                  |                     |             |             |              |             |             |             |              |             |              |
| Nudix (Nucleoside diphosphate linked moiety X)-type motif 1      | Q8IV95 Q8IV95_HUMAN |             |             |              | 0,87        | 0,69        | 0,66        |              |             |              |
|                                                                  |                     |             |             |              | 0,67        | 0,75        | 0,62        |              |             |              |
| NUMA1 variant protein (Fragment)                                 | Q4LE64 Q4LE64_HUMAN |             |             |              | 0,72        | 0,85        | 1,02        | 0,88         | <b>0,72</b> | <b>0,38</b>  |
|                                                                  |                     |             |             |              |             |             |             | <b>0,65</b>  | <b>0,70</b> | <b>0,68</b>  |
| Nurim                                                            | Q8IXM6 NRM_HUMAN    |             |             |              |             |             |             | 0,79         | 1,03        | 0,55         |
| OAT protein                                                      | Q6IAV9 Q6IAV9_HUMAN | <b>0,80</b> | <b>0,80</b> | <b>0,64</b>  |             |             |             |              |             |              |
|                                                                  |                     | <b>0,88</b> | 0,96        |              |             |             |             |              |             |              |
| Obg-like ATPase 1                                                | Q9NTK5 OLA1_HUMAN   |             |             |              | 0,00        | 0,00        | 0,00        |              |             |              |
| OCIA domain-containing protein 1                                 | Q9NX40 OCAD1_HUMAN  | <b>0,72</b> | 0,80        | 0,88         |             |             |             | 0,90         | 1,14        | <b>1,36</b>  |
|                                                                  |                     | 0,94        | 0,97        |              |             |             |             | 1,12         | 1,33        | 1,74         |
| OGFR protein                                                     | Q05BV5 Q05BV5_HUMAN |             |             |              | 0,00        | 0,00        | 0,00        |              |             |              |
|                                                                  |                     |             |             |              | 0,00        | 0,00        | 0,00        |              |             |              |
| Optic atrophy 3 protein                                          | Q9H6K4 OPA3_HUMAN   | 0,99        | 1,01        | 0,92         |             |             |             |              |             |              |
|                                                                  |                     | 0,96        | 0,99        |              |             |             |             |              |             |              |
| ORM1-like protein 2                                              | Q53FV1 ORML2_HUMAN  | 1,25        | 1,41        | 1,09         |             |             |             |              |             |              |
| Osteoclast-stimulating factor 1                                  | Q92882 OSTF1_HUMAN  |             |             |              | 0,87        | 0,89        | <b>0,77</b> |              |             |              |
|                                                                  |                     |             |             |              | 1,00        | <b>0,87</b> | 0,72        |              |             |              |
| Osteopetrosis-associated transmembrane protein 1 precursor       | Q86WC4 OSTM1_HUMAN  | 1,17        | 1,35        | 0,90         |             |             |             | 1,65         | <b>6,40</b> | <b>7,73</b>  |
| OS-9 protein                                                     | Q6IBL2 Q6IBL2_HUMAN |             |             |              |             |             |             |              |             |              |
|                                                                  |                     | 0,98        | 1,10        |              |             |             |             |              |             |              |
| OTTHUMP00000016816                                               | Q5TCG3 Q5TCG3_HUMAN |             |             |              | <b>1,73</b> | <b>1,37</b> | 1,24        |              |             |              |
| Overexpressed breast tumor protein                               | Q96B49 OBTP_HUMAN   |             |             |              |             |             |             |              |             |              |
|                                                                  |                     | 0,00        | 0,00        |              |             |             |             |              |             |              |
| OXCT protein                                                     | Q6IAV5 Q6IAV5_HUMAN |             |             |              | 0,00        | 0,00        | 0,00        |              |             |              |
| Oxidoreductase HTATIP2                                           | Q9BUP3 HTAI2_HUMAN  | 1,16        | 1,25        | 1,17         |             |             |             |              |             |              |
|                                                                  |                     | 0,97        | 0,92        |              |             |             |             |              |             |              |
| Oxidoreductase NAD-binding domain-containing protein 1 precursor | Q96HP4 OXND1_HUMAN  |             |             |              |             |             |             |              |             |              |
|                                                                  |                     | 1,03        | 0,95        |              |             |             |             |              |             |              |
| Oxysterol-binding protein-related protein 8                      | Q9BZF1 OSBL8_HUMAN  | 1,09        | <b>1,44</b> | <b>1,82</b>  |             |             |             |              |             |              |
| p180/ribosome receptor                                           | A7BI36 A7BI36_HUMAN | <b>0,60</b> | 0,96        | <b>1,30</b>  | <b>1,91</b> | 0,90        | 1,08        | 0,88         | <b>1,79</b> | <b>2,03</b>  |
|                                                                  |                     | <b>1,17</b> | <b>1,20</b> |              | 1,48        | <b>0,87</b> | <b>0,82</b> | 0,91         | <b>1,73</b> | <b>1,77</b>  |
| P2X purinoceptor 4                                               | Q99571 P2RX4_HUMAN  | 1,01        | 1,04        | 1,03         |             |             |             |              |             |              |
|                                                                  |                     | 0,98        | 0,99        |              |             |             |             |              |             |              |
| P2X purinoceptor 7                                               | Q99572 P2RX7_HUMAN  |             |             |              |             |             |             |              |             |              |
|                                                                  |                     | 1,11        | 1,10        |              |             |             |             |              |             |              |
| P37 AUF1                                                         | Q12771 Q12771_HUMAN |             |             |              | <b>1,33</b> | <b>1,83</b> | 1,32        | 0,00         | 0,00        | 0,00         |
|                                                                  |                     |             |             |              | 1,18        | 1,20        | 1,04        |              |             |              |
| PA2G4 protein (Fragment)                                         | Q05D08 Q05D08_HUMAN |             |             |              | 0,85        | 0,97        | <b>0,79</b> |              |             |              |
|                                                                  |                     |             |             |              | 0,89        | <b>0,87</b> | <b>0,66</b> | <b>0,48</b>  | 0,86        | <b>0,73</b>  |
| PAFAH1B2 protein                                                 | Q6IBR6 Q6IBR6_HUMAN |             |             |              | 0,88        | 0,98        | 0,97        |              |             |              |
| PAFAH1B3 protein (Fragment)                                      | Q53X88 Q53X88_HUMAN |             |             |              | 0,71        | 0,74        | 0,62        |              |             |              |
| PAPSS1 protein                                                   | Q6IAX6 Q6IAX6_HUMAN |             |             |              | 0,90        | <b>1,24</b> | 0,96        |              |             |              |
|                                                                  |                     |             |             |              | <b>0,86</b> | 1,20        | 0,79        |              |             |              |
| Paraplegin                                                       | Q9UQ90 SPG7_HUMAN   | 0,83        | 1,09        | 0,90         |             |             |             |              |             |              |
|                                                                  |                     | 1,01        | 0,85        |              |             |             |             |              |             |              |
| Paraspeckle component 1                                          | Q8WXF1 PSPC1_HUMAN  |             |             |              |             |             |             | 1,03         | <b>0,27</b> | <b>0,16</b>  |
|                                                                  |                     |             |             |              |             |             |             | <b>1,28</b>  | <b>0,40</b> | <b>0,27</b>  |
| Parathymosin                                                     | P20962 PTMS_HUMAN   |             |             |              | 1,04        | 1,17        | 0,90        |              |             |              |
|                                                                  |                     |             |             |              | <b>0,70</b> | <b>0,82</b> | <b>0,72</b> |              |             |              |
| PC cell-derived growth factor                                    | Q540U8 Q540U8_HUMAN | 1,04        | 0,90        | 0,76         |             |             |             | 0,84         | 0,75        | 1,44         |
|                                                                  |                     | 0,79        | 0,61        |              |             |             |             |              |             |              |
| PC4 and SFRS1-interacting protein                                | O75475 PSIP1_HUMAN  |             |             |              |             |             |             | <b>0,74</b>  | <b>0,45</b> | <b>0,33</b>  |
|                                                                  |                     |             |             |              |             |             |             | 1,05         | 0,89        | 0,82         |
| PC4 protein                                                      | Q6IBA2 Q6IBA2_HUMAN |             |             |              |             |             |             | <b>1,31</b>  | <b>3,86</b> | <b>5,63</b>  |
| PCK2 protein                                                     | Q6IB91 Q6IB91_HUMAN | 0,96        | <b>0,86</b> | <b>0,63</b>  | <b>2,54</b> | <b>1,82</b> | <b>2,85</b> |              |             |              |
|                                                                  |                     | 1,02        | <b>0,83</b> |              | <b>1,81</b> | 1,15        | <b>1,83</b> |              |             |              |
| PDCC6IP protein                                                  | Q6NUS1 Q6NUS1_HUMAN | 0,99        | 1,39        | <b>2,29</b>  |             |             |             |              |             |              |
|                                                                  |                     | 0,99        | 1,12        |              | 0,86        | 0,96        | 0,98        |              |             |              |
| PDZ and LIM domain protein 4                                     | P50479 PDLI4_HUMAN  |             |             |              |             |             |             |              |             |              |
|                                                                  |                     |             |             |              | 0,65        | 0,78        | <b>0,60</b> |              |             |              |
| PDZ and LIM domain protein 5                                     | Q96HC4 PDLI5_HUMAN  |             |             |              |             |             |             |              |             |              |
|                                                                  |                     |             |             |              | 0,54        | <b>0,60</b> | 0,38        |              |             |              |
| PDZ and LIM domain protein 7                                     | Q9NR12 PDLI7_HUMAN  |             |             |              |             |             |             | 0,83         | 0,63        | 0,18         |
|                                                                  |                     |             |             |              | 0,75        | 0,88        | <b>0,59</b> | 0,80         | 0,88        | <b>0,55</b>  |
| PEA15 protein                                                    | Q6FHL9 Q6FHL9_HUMAN |             |             |              | <b>0,79</b> | <b>0,53</b> | <b>0,38</b> |              |             |              |
| PEC1 protein                                                     | Q6IBN4 Q6IBN4_HUMAN | 1,54        | <b>1,29</b> | 1,34         |             |             |             | 0,83         | 1,65        | <b>3,18</b>  |
|                                                                  |                     | <b>0,80</b> | 0,95        |              |             |             |             |              |             |              |
| Peflin                                                           | Q9UBV8 PEF1_HUMAN   | 0,00        | 0,00        | 0,00         | 0,92        | 1,21        | 1,52        | 2,19         | 1,92        | 1,67         |

|                                                                        |                     |                            |                            |             |                            |                     |                            |                            |                            |                            |
|------------------------------------------------------------------------|---------------------|----------------------------|----------------------------|-------------|----------------------------|---------------------|----------------------------|----------------------------|----------------------------|----------------------------|
|                                                                        |                     |                            |                            |             | 1,29                       | 1,02                | 1,00                       | 1,44                       | 2,93                       | 3,23                       |
| Pentatricopeptide repeat-containing protein 3, mitochondrial precursor | Q96EY7 PTCD3_HUMAN  | 0,85<br>0,92               | 0,94<br><b>0,91</b>        | 0,82        |                            |                     |                            |                            |                            |                            |
| Peptidase (Mitochondrial processing) alpha                             | Q5SXM9 Q5SXM9_HUMAN | 0,88<br><b>0,87</b>        | 0,86<br><b>0,84</b>        | <b>0,67</b> |                            |                     |                            |                            |                            |                            |
| Peptide/histidine transporter                                          | Q8N697 Q8N697_HUMAN | 0,92<br>0,83               | 0,97<br>0,86               | 1,25        |                            |                     |                            |                            |                            |                            |
| Peptide methionine sulfoxide reductase                                 | Q9UJ68 MSRA_HUMAN   |                            |                            |             |                            |                     |                            |                            |                            |                            |
| Peptidyl-prolyl cis-trans isomerase                                    | Q9BWS9 CHID1_HUMAN  | 1,09<br>0,96               | 1,07<br>1,05               | <b>0,93</b> | <b>0,72</b><br>0,94        | 0,93<br>0,95        | <b>0,54</b><br>0,64        | <b>0,92</b>                | <b>1,59</b>                | <b>1,84</b>                |
| Peptidyl-prolyl cis-trans isomerase                                    | Q2NKO6 Q2NKO6_HUMAN | 0,95                       | 1,14                       | 1,24        | <b>1,90</b>                | <b>1,22</b>         | <b>2,10</b>                | 0,78                       | 0,51                       | 0,25                       |
| Peptidyl-prolyl cis-trans isomerase                                    | Q53XJ5 Q53XJ5_HUMAN | 0,97                       | 0,93                       | 0,90        |                            |                     |                            |                            |                            |                            |
| Peptidyl-prolyl cis-trans isomerase                                    | Q6IBH5 Q6IBH5_HUMAN |                            |                            |             | <b>1,70</b>                | 1,15                | <b>1,84</b>                |                            |                            |                            |
| Peptidyl-prolyl cis-trans isomerase                                    | Q6FGM6 Q6FGM6_HUMAN |                            |                            |             | 0,78                       | 0,67                | <b>0,47</b>                |                            |                            |                            |
| Peptidyl-prolyl cis-trans isomerase                                    | Q0VDC6 Q0VDC6_HUMAN |                            |                            |             | <b>0,59</b>                | 0,88                | 0,50                       |                            |                            |                            |
| Peptidyl-prolyl cis-trans isomerase                                    | A8K534 A8K534_HUMAN | 0,99                       | <b>1,19</b>                |             |                            |                     |                            |                            |                            |                            |
| Peptidyl-prolyl cis-trans isomerase                                    | Q71V99 Q71V99_HUMAN | <b>1,21</b>                | <b>1,13</b>                |             |                            |                     |                            | <b>0,72</b>                | 0,96                       | <b>0,67</b>                |
| Peptidyl-prolyl cis-trans isomerase                                    | Q53XJ5 Q53XJ5_HUMAN | 0,79                       | 0,97                       |             |                            |                     |                            |                            |                            |                            |
| Peptidyl-prolyl cis-trans isomerase, mitochondrial precursor           | P30405 PPIF_HUMAN   | 0,99                       | 1,04                       |             |                            |                     |                            |                            |                            |                            |
| Peptidyl-prolyl cis-trans isomerase A                                  | P62937 PPIA_HUMAN   |                            |                            |             | <b>0,78</b><br>0,68        | 0,89<br>0,79        | <b>0,82</b><br>0,67        | <b>1,43</b>                | 1,51                       | 1,34                       |
| Peptidyl-prolyl cis-trans isomerase B precursor                        | P23284 PPIB_HUMAN   |                            |                            |             |                            |                     |                            | 0,95                       | <b>1,94</b>                | <b>2,56</b>                |
| Peptidyl-prolyl cis-trans isomerase G                                  | Q13427 PPIG_HUMAN   |                            |                            |             |                            |                     |                            | <b>0,66</b>                | <b>0,58</b>                | 0,45                       |
| Peptidyl-prolyl cis-trans isomerase-like 3                             | Q9H2H8 PPIL3_HUMAN  |                            |                            |             | 0,91                       | 1,05                | 1,65                       |                            |                            |                            |
| Peptidyl-prolyl cis-trans isomerase, mitochondrial precursor           | P30405 PPIF_HUMAN   | <b>0,82</b>                | <b>0,81</b>                | <b>0,48</b> | <b>1,91</b>                | <b>1,66</b>         | <b>2,18</b>                | 0,94<br><b>0,70</b>        | 0,98<br>0,95               | 1,18<br>1,07               |
| Peripheral benzodiazepine receptor                                     | Q13850 Q13850_HUMAN | <b>0,82</b><br>0,93        | 0,96<br><b>0,45</b>        | <b>0,83</b> |                            |                     |                            |                            |                            |                            |
| Periphrin-1                                                            | Q8NEY8 PPHLN_HUMAN  |                            |                            |             |                            |                     |                            | 0,86<br>1,06               | <b>0,22</b><br><b>0,35</b> | <b>0,12</b><br><b>0,34</b> |
| Peroxiredoxin 3 isoform a variant (Fragment)                           | Q53HC2 Q53HC2_HUMAN |                            |                            |             |                            |                     |                            | <b>1,05</b>                | 3,87                       | <b>7,40</b>                |
| Peroxiredoxin-1                                                        | Q06830 PRDX1_HUMAN  | <b>1,33</b><br><b>1,98</b> | <b>2,24</b><br><b>1,67</b> | <b>3,91</b> | <b>0,84</b><br>0,76        | <b>0,83</b><br>0,81 | <b>0,80</b><br>0,76        | <b>2,82</b><br><b>1,62</b> | <b>1,65</b><br><b>0,86</b> | 0,97<br><b>0,60</b>        |
| Peroxiredoxin-2                                                        | P32119 PRDX2_HUMAN  |                            |                            |             | 0,87<br>0,91               | 0,93<br>0,87        | 0,94<br>1,01               |                            |                            |                            |
| Peroxiredoxin-4                                                        | Q13162 PRDX4_HUMAN  | 1,07<br>0,97               | <b>1,23</b><br>1,04        | <b>1,26</b> |                            |                     |                            |                            |                            |                            |
| Peroxiredoxin-5, mitochondrial precursor                               | P30044 PRDX5_HUMAN  | 0,82<br>1,01               | 0,92<br>0,90               | 0,70        | 0,00<br>0,90               | 0,00<br>0,91        | 0,00<br>0,63               |                            |                            |                            |
| Peroxiredoxin-6                                                        | P30041 PRDX6_HUMAN  |                            |                            |             | <b>0,80</b><br>0,88        | 0,90<br>1,07        | <b>0,81</b><br>0,93        |                            |                            |                            |
| Peroxisomal bifunctional enzyme                                        | Q08426 ECHP_HUMAN   |                            |                            |             |                            |                     |                            | 0,00<br>0,00               | 0,00<br>0,00               | 0,00<br>0,00               |
| Peroxisomal long-chain acyl-coA thioesterase variant (Fragment)        | Q53EK4 Q53EK4_HUMAN | 0,88<br>1,05               | <b>0,75</b><br><b>0,93</b> | <b>0,45</b> |                            |                     |                            |                            |                            |                            |
| Peroxisomal membrane protein 11B                                       | O96011 PX11B_HUMAN  | 1,05<br><b>0,81</b>        | 0,96<br>0,99               | 0,81        |                            |                     |                            |                            |                            |                            |
| Peroxisomal membrane protein PEX14                                     | O75381 PEX14_HUMAN  | 0,80<br>0,95               | 0,86<br>1,05               | 0,71        |                            |                     |                            | 0,60                       | 0,78                       | 0,65                       |
| Peroxisomal membrane protein PEX16                                     | Q9Y5Y5 PEX16_HUMAN  | 0,74                       | 0,84                       | 0,63        |                            |                     |                            |                            |                            |                            |
| Peroxisomal multifunctional enzyme type 2                              | P51659 DHB4_HUMAN   | 0,97<br><b>0,94</b>        | 0,88<br>0,98               | <b>0,73</b> | <b>1,67</b><br><b>1,60</b> | 1,15<br>1,11        | <b>1,62</b><br><b>1,39</b> | <b>1,43</b><br><b>0,56</b> | <b>2,43</b><br><b>2,03</b> | <b>4,58</b><br><b>3,07</b> |
| PERQ amino acid-rich with GYF domain-containing protein 2              | Q6Y7W6 PERQ2_HUMAN  |                            |                            |             | 2,99                       | 1,51                | 2,36                       |                            |                            |                            |
| PEST proteolytic signal-containing nuclear protein                     | Q8WW12 PCNP_HUMAN   |                            |                            |             | 0,00<br>0,96               | 0,00<br>0,97        | 0,00<br>0,94               | 1,00<br>1,12               | 0,91<br>1,53               | 0,62<br>1,86               |
| PET112-like variant (Fragment)                                         | Q53GP4 Q53GP4_HUMAN | 1,22<br>0,84               | 0,90<br>0,89               | 0,99        |                            |                     |                            |                            |                            |                            |
| PEX3 protein (Fragment)                                                | Q6FGP5 Q6FGP5_HUMAN |                            |                            |             |                            |                     |                            |                            |                            |                            |
| PGRMC1 protein                                                         | Q6IB11 Q6IB11_HUMAN | 0,95<br>0,85<br>1,02       | 1,10<br>1,00<br>1,06       | 1,02        |                            |                     |                            | 1,15                       | <b>4,68</b>                | <b>7,62</b>                |
| PGS1 protein (Fragment)                                                | Q8TA85 Q8TA85_HUMAN |                            |                            |             |                            |                     |                            |                            |                            |                            |
| PHB protein (Fragment)                                                 | Q6FHP5 Q6FHP5_HUMAN | 0,84<br>0,96               | 0,93<br><b>0,92</b>        | <b>0,84</b> |                            |                     |                            |                            |                            |                            |
| PHD finger-like domain-containing protein 5A                           | Q7RTV0 PHF5A_HUMAN  |                            |                            |             |                            |                     |                            | 0,87<br><b>0,75</b>        | <b>0,50</b><br><b>0,69</b> | <b>0,31</b><br><b>0,52</b> |
| Phenylalanyl-tRNA synthetase alpha chain                               | Q9Y285 SYFA_HUMAN   |                            |                            |             | 1,12                       | 1,14                | 1,22                       | 0,68                       | <b>1,27</b>                | 0,96                       |
| Phenylalanyl-tRNA synthetase beta chain                                | Q9NSD9 SYFB_HUMAN   |                            |                            |             | <b>0,80</b>                | 1,06                | 1,13                       |                            |                            |                            |
| Phenylalanyl-tRNA synthetase, mitochondrial precursor                  | O95363 SYFM_HUMAN   | 0,00<br>0,84               | 0,00<br>0,93               | 0,00        |                            |                     |                            |                            |                            |                            |
| Phosphatase and actin regulator 3                                      | B1AKX0 B1AKX0_HUMAN |                            |                            |             |                            |                     |                            |                            |                            |                            |
| Phosphatidate cytidyltransferase 2                                     | O95674 CDS2_HUMAN   | 1,00<br>1,14<br>0,86       | 0,95<br>1,13<br>1,20       | 1,10        |                            |                     |                            |                            |                            |                            |
| Phosphatidylethanolamine-binding protein 1                             | P30086 PEBP1_HUMAN  |                            |                            |             | <b>0,74</b><br>0,82        | 0,94<br>0,94        | 0,89<br>0,77               |                            |                            |                            |
| Phosphatidylinositol phosphatase SAC1                                  | Q9NTJ5 SAC1_HUMAN   | 1,14<br>1,00               | <b>1,27</b><br>1,05        | <b>1,37</b> |                            |                     |                            |                            |                            |                            |
| Phosphatidylinositol 4-kinase type 2-alpha                             | Q9BTU6 P4K2A_HUMAN  | 0,97<br><b>0,88</b>        | <b>0,88</b><br><b>0,88</b> | <b>0,79</b> |                            |                     |                            |                            |                            |                            |
| Phosphatidylinositol binding clathrin assembly protein                 | Q6GMQ6 Q6GMQ6_HUMAN |                            |                            |             | 0,81                       | 1,03                | 0,81                       | <b>0,70</b>                | <b>0,61</b>                | <b>0,51</b>                |
| Phosphatidylinositol-5-phosphate 4-kinase type-2 alpha                 | P48426 PI42A_HUMAN  | 3,92<br>1,38               |                            | 5,24        |                            |                     |                            |                            |                            |                            |
| Phosphatidylserine decarboxylase proenzyme                             | Q9UG56 PISD_HUMAN   | 0,91                       | 0,93                       |             |                            |                     |                            |                            |                            |                            |
| Phosphatidylserine synthase 2                                          | Q9BVG9 PTSS2_HUMAN  | 0,00                       | 0,00                       | 0,00        |                            |                     |                            |                            |                            |                            |
| Phosphofructokinase, platelet                                          | Q5VSR7 Q5VSR7_HUMAN |                            |                            |             | <b>0,81</b>                | 0,87                | <b>0,53</b>                |                            |                            |                            |
| Phosphofructokinase-P (Fragment)                                       | O14943 O14943_HUMAN | 2,14                       | 1,98                       | 2,66        |                            |                     |                            |                            |                            |                            |
| Phosphoglucosyltransferase-1                                           | P36871 PGM1_HUMAN   |                            |                            |             | 0,92<br>1,11               | 0,90<br>1,11        | 1,03<br>1,10               |                            |                            |                            |
| Phosphoglucosyltransferase-2                                           | Q96G03 PGM2_HUMAN   |                            |                            |             | 1,03<br>0,90               | <b>1,14</b><br>1,09 | 1,00<br>1,14               |                            |                            |                            |
| Phosphoglycerate dehydrogenase                                         | Q5SZU1 Q5SZU1_HUMAN |                            |                            |             | 1,18                       | 0,93                | 0,52                       |                            |                            |                            |
| Phosphoglycerate kinase 1                                              | P00558 PGK1_HUMAN   | 1,27<br><b>1,61</b>        | <b>1,69</b><br><b>1,55</b> | <b>2,13</b> | <b>0,82</b><br>0,78        | 0,98<br>1,03        | <b>0,92</b><br>0,95        | 1,12<br><b>0,68</b>        | 1,34<br>0,90               | 1,71<br><b>0,82</b>        |

|                                                                                                             |                     |                      |                                    |              |                            |                             |                             |                     |                            |                            |
|-------------------------------------------------------------------------------------------------------------|---------------------|----------------------|------------------------------------|--------------|----------------------------|-----------------------------|-----------------------------|---------------------|----------------------------|----------------------------|
| Phosphoglycerate mutase 1                                                                                   | Q6P6D7 Q6P6D7_HUMAN |                      |                                    |              | <b>0,87</b>                | <b>0,87</b>                 | 0,92                        |                     |                            |                            |
| Phosphoglycerate mutase 2                                                                                   | A4D2J6 A4D2J6_HUMAN |                      |                                    |              | 1,07                       | 1,08                        | 1,05                        |                     |                            |                            |
| Phosphoglycerate mutase family member 5 precursor                                                           | Q96HS1 PGAM5_HUMAN  | 1,09<br>0,91         | 0,99<br><b>0,88</b>                | 0,85         |                            |                             |                             | 0,87                | 1,63                       | 1,31                       |
| Phosphoglycolate phosphatase                                                                                | A6NDG6 PGP_HUMAN    |                      |                                    |              | 0,97<br>1,01               | 0,77<br><b>0,67</b>         | 0,87<br>0,78                |                     |                            |                            |
| Phospholipase A2, group VII                                                                                 | Q5VTT1 Q5VTT1_HUMAN | 0,00                 | 0,00                               | 0,00         |                            |                             |                             |                     |                            |                            |
| Phospholipase D1 variant (Fragment)                                                                         | Q59EA4 Q59EA4_HUMAN |                      |                                    |              |                            |                             |                             |                     |                            |                            |
| Phospholipase D3                                                                                            | Q8IV08 PLD3_HUMAN   | 0,93<br>1,00<br>0,94 | 0,94<br><b>0,76</b><br><b>0,71</b> | <b>0,58</b>  | <b>2,07</b><br>1,36        | 0,74<br><b>0,52</b>         | <b>0,75</b><br><b>0,70</b>  |                     |                            |                            |
| Phosphomannomutase 2                                                                                        | O15305 PMM2_HUMAN   |                      |                                    |              | 0,66                       | 0,82                        | 0,74                        |                     |                            |                            |
| Phosphopantothenate--cysteine ligase                                                                        | Q9HAB8 PPCS_HUMAN   |                      |                                    |              | 0,96<br>0,53               | 1,12<br>0,76                | 1,22<br>0,88                |                     |                            |                            |
| Phosphoprotein associated with glycosphingolipid-enriched microdomains 1                                    | Q9NWX8 PAG1_HUMAN   |                      |                                    |              |                            |                             |                             | 0,00                | 0,00                       | 0,00                       |
| Phosphoprotein enriched in astrocytes 15                                                                    | B1AKZ3 B1AKZ3_HUMAN |                      |                                    |              |                            |                             |                             |                     |                            |                            |
| Phosphoribosylglycinamide formyltransferase, phosphoribosylglycinamide synthetase, Phosphorylase (Fragment) | Q59HH3 Q59HH3_HUMAN | 0,91                 | 1,30                               | 2,49         | <b>0,51</b><br>0,95        | <b>0,30</b><br>0,87         | 0,20<br><b>0,67</b>         |                     |                            |                            |
|                                                                                                             | Q59GM9 Q59GM9_HUMAN |                      |                                    |              | 0,79<br>0,96               | 0,90<br>1,02                | 0,82<br>0,95                |                     |                            |                            |
| Phostensin                                                                                                  | Q6NYC8 PHTNS_HUMAN  |                      |                                    |              | <b>1,37</b><br>0,84        | 1,19<br>0,98                | <b>1,36</b><br>1,08         | <b>1,59</b><br>0,90 | <b>0,60</b><br><b>0,35</b> | <b>0,44</b><br><b>0,40</b> |
| PICALM variant protein (Fragment)                                                                           | Q4LE54 Q4LE54_HUMAN | 0,92                 | <b>0,50</b>                        | <b>0,54</b>  |                            |                             |                             |                     |                            |                            |
| PIK4CA variant protein (Fragment)                                                                           | Q4LE69 Q4LE69_HUMAN |                      |                                    |              | 0,00                       | 0,00                        | 0,00                        |                     |                            |                            |
| Pinin                                                                                                       | Q9H307 PININ_HUMAN  |                      |                                    |              |                            |                             |                             | <b>0,80</b><br>1,02 | <b>0,55</b><br>0,92        | <b>0,24</b><br><b>0,60</b> |
| PITSLRE serine/threonine-protein kinase CDC2L1                                                              | P21127 CD2L1_HUMAN  |                      |                                    |              |                            |                             |                             | 1,06<br>1,23        | 0,64<br>0,82               | 0,50<br>0,84               |
| Pituitary tumor-transforming gene 1 protein-interacting protein precursor                                   | P53801 PTTG_HUMAN   | 1,04                 | 0,84                               |              |                            |                             |                             |                     |                            |                            |
| Placenta apolipoprotein B48 receptor type 2                                                                 | Q9NS13 Q9NS13_HUMAN | <b>0,74</b>          | 0,86                               | 1,27         |                            |                             |                             |                     |                            |                            |
| Plasma alpha-L-fucosidase precursor                                                                         | Q9BTY2 FUCO2_HUMAN  |                      |                                    |              |                            |                             |                             |                     |                            |                            |
| Plasma glutamate carboxypeptidase precursor                                                                 | Q9Y646 PGCP_HUMAN   | 1,07<br>1,36<br>0,82 | 0,99<br>1,75<br>0,84               | 1,60         |                            |                             |                             |                     |                            |                            |
| Plasma membrane calcium-transporting ATPase 1                                                               | P20020 AT2B1_HUMAN  | 1,10<br>1,17         | 1,09<br><b>1,27</b>                | <b>1,23</b>  |                            |                             |                             |                     |                            |                            |
| Plasminogen activator inhibitor 1 RNA-binding protein                                                       | Q8NC51 PAIRB_HUMAN  |                      |                                    |              | 0,97<br>0,74               | <b>0,79</b><br>0,75         | <b>0,84</b><br><b>0,77</b>  | <b>0,80</b><br>1,21 | 0,96<br><b>1,32</b>        | <b>0,62</b><br>1,07        |
| Platelet endothelial cell adhesion molecule precursor                                                       | P16284 PECA1_HUMAN  | 1,01                 | 0,76                               | 0,61         | 1,84                       | 0,88                        | 0,93                        |                     |                            |                            |
| Platelet glycoprotein 4                                                                                     | P16671 CD36_HUMAN   | <b>1,26</b>          | <b>0,75</b>                        | <b>0,83</b>  |                            |                             |                             |                     |                            |                            |
| Platelet receptor G124 precursor                                                                            | Q9H7M9 G124_HUMAN   | 1,16                 | 1,05                               | 1,30         |                            |                             |                             |                     |                            |                            |
| Pleckstrin homology domain-containing family O member 2                                                     | Q8TD55 PKHO2_HUMAN  | 1,36                 | <b>2,55</b>                        | <b>4,24</b>  | 0,97<br><b>0,71</b>        | 1,00<br><b>0,77</b>         | <b>0,84</b><br><b>0,61</b>  | 1,44                | <b>8,33</b>                | <b>6,30</b>                |
| Pleckstrin homology, Sec7 and coiled-coil domains 4 (Fragment)                                              | B1AH11 B1AH11_HUMAN |                      |                                    |              | 0,00                       | 0,00                        | 0,00                        |                     |                            |                            |
| Plectin 10                                                                                                  | Q6S377 Q6S377_HUMAN |                      |                                    |              |                            |                             |                             |                     |                            |                            |
| Plectin 6                                                                                                   | Q6S380 Q6S380_HUMAN | <b>1,15</b>          | <b>1,23</b>                        |              |                            |                             |                             |                     |                            |                            |
| Plectin-1                                                                                                   | Q15149 PLEC1_HUMAN  | 0,89                 | <b>1,34</b>                        | <b>2,26</b>  | <b>1,96</b><br>2,09        | <b>1,70</b><br>1,89         | <b>1,80</b><br>1,90         | <b>1,16</b>         | <b>0,38</b>                | <b>0,45</b>                |
| Pleiotropic regulator 1                                                                                     | O43660 PLRG1_HUMAN  |                      |                                    |              |                            |                             |                             | 0,29                | 0,34                       | 0,30                       |
| PLEK protein (Fragment)                                                                                     | Q6FGQ1 Q6FGQ1_HUMAN |                      |                                    |              |                            |                             |                             | 0,53                | <b>0,28</b>                | 0,15                       |
| Plexin domain-containing protein 2 precursor                                                                | Q6UX71 PXDC2_HUMAN  | 1,55<br>1,13<br>1,04 | <b>2,72</b><br>0,90<br>0,70        | <b>5,42</b>  | <b>0,79</b><br><b>0,79</b> | 0,92<br>1,07                | <b>0,82</b><br>1,01         |                     |                            |                            |
| Plexin-B2 precursor                                                                                         | O15031 PLXB2_HUMAN  | 1,15<br>1,12         | <b>0,78</b><br>0,99                | <b>0,88</b>  |                            |                             |                             |                     |                            |                            |
| PLS1 protein                                                                                                | Q8NEG6 Q8NEG6_HUMAN |                      |                                    |              |                            |                             |                             |                     |                            |                            |
| PML-RARA-regulated adapter molecule 1                                                                       | Q96QH2 PRAM_HUMAN   |                      |                                    |              | 0,72<br>0,96<br>0,71       | 1,27<br><b>0,68</b><br>0,78 | 1,33<br><b>0,48</b><br>0,69 | 1,12<br>1,19        | 0,91<br>1,48               | <b>0,37</b><br>0,85        |
| POLDIP3 protein (Fragment)                                                                                  | Q96D19 Q96D19_HUMAN |                      |                                    |              |                            |                             |                             | <b>1,34</b>         | 0,90                       | 0,56                       |
| POLR2C protein                                                                                              | Q6FGR6 Q6FGR6_HUMAN |                      |                                    |              |                            |                             |                             | 1,14                | 0,54                       | 0,36                       |
| Poly [ADP-ribose] polymerase 1                                                                              | P09874 PARP1_HUMAN  |                      |                                    |              |                            |                             |                             | 1,01<br>0,45        | 0,92<br>0,76               | 1,01<br>0,92               |
| Poly(A) RNA polymerase, mitochondrial precursor                                                             | Q9NVV4 PAPD1_HUMAN  |                      |                                    |              |                            |                             |                             |                     |                            |                            |
| Poly(ADP-ribose) glycohydrolase ARH3                                                                        | Q9NX46 ARHL2_HUMAN  | 1,03                 | 0,96                               |              |                            |                             |                             |                     |                            |                            |
| Poly(RC) binding protein 2                                                                                  | Q6IPF4 Q6IPF4_HUMAN | 0,90<br>1,68         | 0,89<br><b>6,85</b>                | <b>12,75</b> |                            |                             |                             |                     |                            |                            |
| Poly(RC)-binding protein 2 isoform b variant (Fragment)                                                     | Q59HD4 Q59HD4_HUMAN |                      |                                    |              | 1,01                       | 0,80                        | <b>0,52</b>                 | 0,00                | 0,00                       | 0,00                       |
| Poly(U)-binding-splicing factor PUF60                                                                       | Q9UHX1 PUF60_HUMAN  |                      |                                    |              |                            |                             |                             | 0,84                | 0,63                       | 0,67                       |
| Polyadenylate-binding protein 1                                                                             | P11940 PABP1_HUMAN  | 1,10                 | <b>3,08</b>                        | <b>6,35</b>  | <b>1,48</b><br>1,52        | <b>1,13</b><br>1,05         | 0,93<br>1,09                | 0,99<br>0,91        | 1,22<br>0,84               | 0,86<br>0,74               |
| Polyadenylate-binding protein 2                                                                             | Q86U42 PABP2_HUMAN  |                      |                                    |              |                            |                             |                             | 0,95<br><b>1,35</b> | <b>0,14</b><br><b>0,28</b> | <b>0,11</b><br><b>0,30</b> |
| Polyglutamine-binding protein 1                                                                             | O60828 PQBP1_HUMAN  |                      |                                    |              |                            |                             |                             | 0,91<br>0,00        | <b>0,28</b><br>0,00        | <b>0,21</b><br>0,00        |
| Polymerase acidic protein                                                                                   | Q3HM39 PA_I18A0     |                      |                                    |              | 1,37                       | 2,00                        | 1,16                        |                     |                            |                            |
| Polymerase acidic protein                                                                                   | O89752 PA_I97A1     |                      |                                    |              |                            |                             |                             |                     |                            |                            |
| Polymerase acidic protein                                                                                   | Q1K9E2 PA_I72A2     | 1,33<br><b>2,43</b>  | 1,97<br><b>5,24</b>                | <b>8,34</b>  |                            |                             |                             |                     |                            |                            |
| Polymerase basic protein 2                                                                                  | Q8QPG7 PB2_I00A0    | 1,61                 | 2,34                               | 2,38         | <b>1,83</b>                | <b>3,26</b>                 | <b>3,42</b>                 |                     |                            |                            |
| Polymerase basic protein 2                                                                                  | Q67296 PB2_I72A2    |                      |                                    |              |                            |                             |                             | 5,70                | 0,93                       | 1,31                       |
| Polymerase delta-interacting protein 2                                                                      | Q9Y2S7 PDIP2_HUMAN  |                      |                                    |              |                            |                             |                             |                     |                            |                            |
| Polymerase delta-interacting protein 3                                                                      | Q9BY77 PDIP3_HUMAN  | 1,01                 | <b>0,85</b>                        |              |                            |                             |                             | 1,21                | <b>0,36</b>                | <b>0,16</b>                |
| Polypeptide N-acetyl-galactosaminyltransferase 1                                                            | Q10472 GALT1_HUMAN  | 0,00                 | 0,00                               | 0,00         |                            |                             |                             |                     |                            |                            |
| Polypeptide N-acetyl-galactosaminyltransferase 12                                                           | Q8IXK2 GLT12_HUMAN  | 1,16<br>0,98         | 0,72<br>0,95                       | 0,90         |                            |                             |                             |                     |                            |                            |
| Polypeptide N-acetyl-galactosaminyltransferase 2                                                            | Q10471 GALT2_HUMAN  | <b>1,33</b><br>1,03  | <b>0,62</b><br>1,02                | <b>0,77</b>  |                            |                             |                             |                     |                            |                            |
| Polypyrimidine tract binding protein 1                                                                      | Q9BUQ0 Q9BUQ0_HUMAN | 0,81                 | 1,44                               | <b>3,33</b>  |                            |                             |                             | <b>0,86</b>         | <b>0,31</b>                | <b>0,20</b>                |

|                                                                                                |                     |                     |                            |             |                     |                     |                     |                            |                            |                            |
|------------------------------------------------------------------------------------------------|---------------------|---------------------|----------------------------|-------------|---------------------|---------------------|---------------------|----------------------------|----------------------------|----------------------------|
|                                                                                                |                     |                     |                            |             | <b>1,19</b>         | <b>1,63</b>         | 1,23                | <b>1,36</b>                | <b>0,35</b>                | <b>0,39</b>                |
| Polyribonucleotide nucleotidyltransferase 1, mitochondrial precursor                           | Q8TCS8 PNPT1_HUMAN  | 1,29<br>1,05        | <b>1,30</b><br>1,01        | 1,10        |                     |                     |                     | 0,86<br><b>0,38</b>        | 0,75<br>1,35               | 0,90<br><b>1,27</b>        |
| Porphobilinogen deaminase                                                                      | P08397 HEM3_HUMAN   |                     |                            |             | 1,19                | 0,99                | 0,86                |                            |                            |                            |
| Possible J 56 gene segment (Fragment)                                                          | A0N4V7 A0N4V7_HUMAN |                     |                            |             | 1,15                | 0,65                | 1,72                |                            |                            |                            |
| PPM1G protein                                                                                  | Q6IAU5 Q6IAU5_HUMAN |                     |                            |             | 0,49                | 0,80                | 0,64                |                            |                            |                            |
| PPM2C protein (Fragment)                                                                       | Q6P1N1 Q6P1N1_HUMAN |                     |                            |             |                     |                     |                     |                            |                            |                            |
| PPT1 protein (Fragment)                                                                        | Q6FGQ4 Q6FGQ4_HUMAN | 1,14<br>1,10        | 0,96<br>1,11               | <b>0,85</b> | <b>1,60</b>         | <b>0,79</b>         | <b>0,66</b>         |                            |                            |                            |
| PQ-loop repeat-containing protein 1                                                            | Q8N2U9 PQLC1_HUMAN  | <b>0,89</b>         | <b>0,76</b>                | 1,08        | <b>1,56</b>         | 0,80                | <b>0,59</b>         |                            |                            |                            |
| PRA1 family protein 3                                                                          | O75915 PRAF3_HUMAN  | <b>0,69</b><br>1,04 | 1,09<br><b>1,46</b>        | 1,37        | <b>2,07</b>         | 1,23                | <b>1,41</b>         | 1,00<br>1,22               | <b>8,12</b><br><b>4,62</b> | <b>7,02</b><br><b>6,20</b> |
| Prefoldin subunit 1                                                                            | O60925 PFD1_HUMAN   |                     |                            |             | 0,85                | 0,72                | 0,85                |                            |                            |                            |
| Prefoldin subunit 2                                                                            | Q9UHV9 PFD2_HUMAN   |                     |                            |             | 0,90                | 0,87                | 0,81                |                            |                            |                            |
| Prefoldin subunit 5                                                                            | Q99471 PFD5_HUMAN   |                     |                            |             | 0,93<br>0,60        | 0,80<br>0,66        | 0,83<br>0,69        |                            |                            |                            |
| Prefoldin subunit 6                                                                            | A2AB88 A2AB88_HUMAN |                     |                            |             | 1,02<br>0,00        | 0,94<br>0,00        | 1,11<br>0,00        |                            |                            |                            |
| Pre-mRNA 3'-end-processing factor FIP1                                                         | Q6UN15 FIP1_HUMAN   |                     |                            |             |                     |                     |                     | 0,87                       | <b>0,39</b>                | 0,25                       |
| Pre-mRNA cleavage complex 2 protein Pcf11                                                      | O94913 PCF11_HUMAN  |                     |                            |             |                     |                     |                     | 0,77<br>0,00               | 0,28<br>0,00               | 0,13<br>0,00               |
| Pre-mRNA-processing factor 19                                                                  | Q9UMS4 PRP19_HUMAN  |                     |                            |             |                     |                     |                     | <b>0,22</b>                | <b>0,30</b>                | <b>0,29</b>                |
| Pre-mRNA-processing factor 40 homolog A                                                        | O75400 PR40A_HUMAN  |                     |                            |             |                     |                     |                     | <b>0,83</b><br><b>0,75</b> | <b>0,62</b><br><b>0,60</b> | <b>0,41</b><br><b>0,54</b> |
| Pre-mRNA-processing factor 6                                                                   | O94906 PRP6_HUMAN   |                     |                            |             |                     |                     |                     | 0,97<br><b>0,33</b>        | 0,48<br><b>0,35</b>        | 0,48<br><b>0,25</b>        |
| Pre-mRNA-processing-splicing factor 8                                                          | Q6P2Q9 PRP8_HUMAN   |                     |                            |             |                     |                     |                     | <b>1,46</b><br><b>0,20</b> | 0,92<br><b>0,46</b>        | 1,04<br><b>0,35</b>        |
| Pre-mRNA-splicing regulator WTAP                                                               | Q15007 FL2D_HUMAN   |                     |                            |             |                     |                     |                     | 0,99                       | <b>0,33</b>                | <b>0,25</b>                |
| Prenylcysteine oxidase 1 precursor                                                             | Q9UHG3 PCYOX_HUMAN  |                     |                            |             |                     |                     |                     |                            |                            |                            |
| Prenylated Rab acceptor protein 1                                                              | Q9UI14 PRAF1_HUMAN  | 1,06<br>1,27        | 1,34<br>0,65               | 0,70        |                     |                     |                     |                            |                            |                            |
| Presenilin 2                                                                                   | B1AP22 B1AP22_HUMAN |                     |                            |             | 1,27                | 1,09                |                     |                            |                            |                            |
| Presenilins-associated rhomboid-like protein, mitochondrial precursor                          | Q9H300 PARL_HUMAN   |                     |                            |             | 0,83                | <b>0,78</b>         |                     |                            |                            |                            |
| Presequence protease, mitochondrial precursor                                                  | Q5JRX3 PREP_HUMAN   | 0,92<br>0,99        | <b>0,85</b><br>0,96        | <b>0,66</b> |                     |                     |                     |                            |                            |                            |
| Probable 10-formyltetrahydrofolate dehydrogenase ALDH1L2                                       | Q3SY69 AL1L2_HUMAN  |                     |                            |             | 0,93                | <b>0,81</b>         |                     |                            |                            |                            |
| Probable alanyl-tRNA synthetase, mitochondrial precursor                                       | Q5JTZ9 SYAM_HUMAN   | 0,99<br>1,01        | 1,12<br>0,91               | 1,19        |                     |                     |                     |                            |                            |                            |
| Probable arginyl-tRNA synthetase, mitochondrial precursor                                      | Q5T160 SYRM_HUMAN   |                     |                            |             | 0,97                | 0,95                |                     |                            |                            |                            |
| Probable asparaginyl-tRNA synthetase, mitochondrial precursor                                  | Q96I59 SYNM_HUMAN   |                     |                            |             | 0,95                | 0,99                |                     |                            |                            |                            |
| Probable ATP-dependent RNA helicase DDX17                                                      | Q92841 DDX17_HUMAN  |                     |                            |             |                     |                     |                     |                            |                            |                            |
| Probable ATP-dependent RNA helicase DDX23                                                      | Q9BUQ8 DDX23_HUMAN  |                     |                            |             | 1,21                | 1,19                | 1,15                |                            |                            |                            |
| Probable ATP-dependent RNA helicase DDX28                                                      | Q9NUL7 DDX28_HUMAN  | 0,00<br><b>0,83</b> | 0,00<br>0,84               | 0,00        |                     |                     |                     | 0,87<br><b>0,52</b>        | 0,76<br><b>0,55</b>        | 0,86<br><b>0,41</b>        |
| Probable ATP-dependent RNA helicase DDX46                                                      | Q7L014 DDX46_HUMAN  |                     |                            |             |                     |                     |                     |                            |                            |                            |
| Probable ATP-dependent RNA helicase DDX5                                                       | P17844 DDX5_HUMAN   | 0,97<br>1,07        | 1,27<br><b>1,37</b>        | <b>1,75</b> | 1,01<br>0,97        | 1,09<br>1,44        | <b>0,66</b><br>0,82 | <b>0,61</b><br><b>1,32</b> | <b>0,50</b><br><b>0,35</b> | <b>0,40</b><br><b>0,29</b> |
| Probable cation-transporting ATPase 13A1                                                       | Q9HD20 AT131_HUMAN  | 0,94<br>0,99        | 1,09<br>1,07               | 1,00        |                     |                     |                     | <b>0,65</b>                | <b>0,48</b>                | <b>0,36</b>                |
| Probable cysteinyl-tRNA synthetase, mitochondrial precursor                                    | Q9HA77 SYCM_HUMAN   | 0,91<br>0,99        | 0,84<br><b>0,91</b>        | 0,83        |                     |                     |                     |                            |                            |                            |
| Probable D-lactate dehydrogenase, mitochondrial precursor                                      | Q86WU2 LDHD_HUMAN   | 0,86<br><b>0,86</b> | <b>0,75</b><br><b>0,86</b> | <b>0,70</b> |                     |                     |                     |                            |                            |                            |
| Probable E3 ubiquitin-protein ligase HERC2                                                     | O95714 HERC2_HUMAN  |                     |                            |             | 0,95714             | HERC2_HUMAN         |                     |                            |                            |                            |
| Probable ergosterol biosynthetic protein 28                                                    | Q9UKR5 ERG28_HUMAN  |                     |                            |             | 0,92                | 0,94                |                     |                            |                            |                            |
| Probable histidyl-tRNA synthetase, mitochondrial precursor                                     | P49590 SYHM_HUMAN   | <b>0,85</b><br>0,94 | <b>0,65</b><br>0,97        | 0,76        |                     |                     |                     |                            |                            |                            |
| Probable hydrolase PNKD                                                                        | Q8N490 PNKD_HUMAN   | <b>1,11</b><br>0,90 | 0,98<br>0,91               | 0,80        |                     |                     |                     |                            |                            |                            |
| Probable leucyl-tRNA synthetase, mitochondrial precursor                                       | Q15031 SYLM_HUMAN   | 1,04<br>0,93        | 1,05<br>0,97               |             |                     |                     |                     |                            |                            |                            |
| Probable peptidyl-tRNA hydrolase                                                               | Q86Y79 PTH_HUMAN    |                     |                            |             | 1,06                | 0,91                |                     |                            |                            |                            |
| Probable protein BRICK1                                                                        | Q8WUW1 BRK1_HUMAN   |                     |                            |             |                     |                     |                     | 0,79<br>0,79               | <b>1,77</b><br><b>1,60</b> | <b>1,45</b><br><b>1,81</b> |
| Probable RNA-binding protein 25                                                                | P49756 RBM25_HUMAN  |                     |                            |             |                     |                     |                     | 0,92                       | <b>0,56</b>                | <b>0,38</b>                |
| Probable rRNA-processing protein EBP2                                                          | Q99848 EBP2_HUMAN   |                     |                            |             |                     |                     |                     | <b>0,72</b><br>0,94        | <b>0,76</b><br>0,95        | <b>0,62</b><br>1,21        |
| Probable saccharopine dehydrogenase                                                            | Q8NBX0 SCPDH_HUMAN  | 0,88<br>0,96        | 0,91<br>1,04               | 0,97        |                     |                     |                     |                            |                            |                            |
| Probable serine carboxypeptidase CPVL precursor                                                | Q9H3G5 CPVL_HUMAN   | <b>1,33</b><br>0,90 | <b>1,60</b><br>0,95        | <b>1,32</b> | 0,00<br>0,00        | 0,00<br>0,00        | 0,00<br>0,00        | 1,09                       | 1,08                       | 1,00                       |
| Procollagen-lysine,2-oxoglutarate 5-dioxygenase 1 precursor                                    | Q02809 PLOD1_HUMAN  | 1,53<br>0,85        | 0,93<br>1,02               | 1,26        |                     |                     |                     |                            |                            |                            |
| Procollagen-lysine,2-oxoglutarate 5-dioxygenase 3 precursor                                    | O60568 PLOD3_HUMAN  | 1,08<br>0,98        | 1,11<br>1,05               | 1,14        |                     |                     |                     | 1,08                       | <b>1,75</b>                | <b>4,89</b>                |
| Procollagen-proline, 2-oxoglutarate 4-dioxygenase (Proline 4-hydroxylase), alpha polypeptide I | Q5V5Q6 Q5V5Q6_HUMAN | 0,81<br>1,03        | 0,88<br>1,08               | 0,93        |                     |                     |                     |                            |                            |                            |
| Profilin 1                                                                                     | P07737 PROF1_HUMAN  | 0,00<br>1,01        | 0,00<br>1,05               | 0,00        | 0,96<br>1,06        | 1,11<br><b>0,82</b> | 1,16<br>1,39        | 0,00                       | 0,00                       | 0,00                       |
| Progerin                                                                                       | Q6UYC3 Q6UYC3_HUMAN | <b>0,58</b>         | <b>0,31</b>                | <b>0,40</b> |                     |                     |                     | <b>0,95</b>                | <b>0,38</b>                | <b>0,18</b>                |
| Programmed cell death 6                                                                        | Q2YDC2 Q2YDC2_HUMAN |                     |                            |             | 1,21                | 1,13                | <b>1,79</b>         |                            |                            |                            |
| Programmed cell death 6-interacting protein                                                    | Q8WUM4 PDC6_HUMAN   |                     |                            |             | <b>0,87</b>         | <b>0,82</b>         | <b>0,74</b>         |                            |                            |                            |
| Programmed cell death protein 10                                                               | Q9BUL8 PDC10_HUMAN  |                     |                            |             | 0,61                | 0,78                | 0,61                |                            |                            |                            |
| Programmed cell death protein 4                                                                | Q53EL6 PDCD4_HUMAN  |                     |                            |             |                     |                     |                     |                            |                            |                            |
| Programmed cell death protein 5                                                                | O14737 PDCD5_HUMAN  |                     |                            |             | <b>0,66</b><br>0,59 | 0,77<br>0,79        | <b>0,70</b><br>0,68 |                            |                            |                            |
| Programmed cell death protein 6                                                                | O75340 PDCD6_HUMAN  |                     |                            |             | 0,55                | <b>0,69</b>         | <b>0,64</b>         |                            |                            |                            |
| Prohibitin                                                                                     | P35232 PHB_HUMAN    |                     |                            |             |                     |                     |                     | 1,50                       | <b>1,64</b>                | 1,45                       |
|                                                                                                |                     | <b>0,91</b>         | <b>0,93</b>                |             |                     |                     |                     |                            |                            |                            |

|                                                                       |                     |             |             |             |             |             |             |             |             |              |
|-----------------------------------------------------------------------|---------------------|-------------|-------------|-------------|-------------|-------------|-------------|-------------|-------------|--------------|
| Prohibitin variant (Fragment)                                         | Q53FV0 Q53FV0_HUMAN |             |             |             | 2,86        | 1,56        | 1,58        | 0,92        | 3,51        | 5,54         |
| Prohibitin-2                                                          | Q99623 PHB2_HUMAN   | 1,00        | 0,95        | <b>0,86</b> | 1,45        | 1,02        | 1,04        | 0,81        | <b>2,65</b> | <b>3,20</b>  |
|                                                                       |                     | 1,00        | 1,01        |             | <b>2,36</b> | 1,10        | 1,43        | 1,10        | <b>2,09</b> | <b>3,88</b>  |
| Prolactin regulatory element-binding protein                          | Q9HCU5 PREB_HUMAN   | <b>0,76</b> | 0,85        |             |             |             |             |             |             |              |
| Proliferating cell nuclear antigen                                    | P12004 PCNA_HUMAN   |             |             |             | 0,91        | 1,03        | 0,82        |             |             |              |
|                                                                       |                     |             |             |             | 0,91        | 0,91        | <b>0,61</b> |             |             |              |
| Proliferation-associated protein 2G4                                  | Q9UQ80 P2G4_HUMAN   |             |             |             |             |             |             | 0,96        | <b>1,10</b> | <b>1,37</b>  |
| Proline synthetase co-transcribed bacterial homolog protein           | Q94903 PROSC_HUMAN  | 0,00        | 0,00        | 0,00        |             |             |             |             |             |              |
|                                                                       |                     | 0,87        | 0,84        |             | 0,79        | 1,03        | 0,85        |             |             |              |
| Proline-, glutamic acid- and leucine-rich protein 1                   | Q81ZL8 PELP1_HUMAN  |             |             |             |             |             |             | 0,21        | 0,39        | 0,28         |
| Proline-serine-threonine phosphatase-interacting protein 1            | O43586 PPIP1_HUMAN  | 0,76        | 0,82        | 1,07        |             |             |             |             |             |              |
|                                                                       | Q07954 LRP1_HUMAN   | <b>1,09</b> | <b>0,71</b> | <b>0,74</b> |             |             |             | 0,96        | 0,68        | 0,86         |
|                                                                       |                     | 0,98        | <b>0,82</b> |             | 0,84        | 1,04        | 0,75        |             |             |              |
| Prolow-density lipoprotein receptor-related protein 1 precursor       | Q32P28 P3H1_HUMAN   |             |             |             |             |             |             |             |             |              |
| Prolyl 3-hydroxylase 1 precursor                                      |                     | 0,99        | <b>1,27</b> |             |             |             |             |             |             |              |
| Prolyl endopeptidase                                                  | Q9UM02 Q9UM02_HUMAN |             |             |             | 0,65        | 0,86        | 0,52        |             |             |              |
|                                                                       |                     |             |             |             | 1,47        | 1,17        | 1,22        |             |             |              |
| Propionyl Coenzyme A carboxylase, beta polypeptide variant (Fragment) | Q59GV0 Q59GV0_HUMAN | 0,85        | 0,85        |             |             |             |             |             |             |              |
| Propionyl-CoA carboxylase alpha subunit                               | Q8WXQ7 Q8WXQ7_HUMAN | 1,00        | 1,24        | 1,21        |             |             |             |             |             |              |
|                                                                       |                     | 0,89        | 0,98        |             |             |             |             |             |             |              |
| Propionyl-CoA carboxylase beta chain, mitochondrial precursor         | P05166 PCCB_HUMAN   | 0,73        | 0,59        | <b>0,52</b> |             |             |             |             |             |              |
| Prosaposin                                                            | B1AVU8 B1AVU8_HUMAN |             |             |             |             |             |             |             |             |              |
|                                                                       |                     | 0,98        | 0,99        |             |             |             |             |             |             |              |
| Prosaposin variant (Fragment)                                         | Q59EN5 Q59EN5_HUMAN | 0,96        | 0,88        | <b>0,72</b> | <b>1,84</b> | 0,90        | <b>1,22</b> | 1,03        | <b>1,29</b> | 1,32         |
|                                                                       |                     |             |             |             | 1,34        | 0,55        | 1,12        |             |             |              |
| Prostaglandin E synthase 2                                            | Q9H7Z7 PGES2_HUMAN  | 0,92        | <b>0,79</b> | <b>0,69</b> |             |             |             |             |             |              |
|                                                                       |                     | 1,07        | 1,04        |             | 0,00        | 0,00        | 0,00        |             |             |              |
| Prostaglandin E synthase 3                                            | Q15185 TEBP_HUMAN   |             |             |             | 0,82        | <b>0,82</b> | <b>0,60</b> |             |             |              |
|                                                                       |                     |             |             |             | <b>0,70</b> | <b>0,67</b> | <b>0,59</b> |             |             |              |
| Prostaglandin G/H synthase 1 precursor                                | P23219 PGH1_HUMAN   | 0,93        | 1,08        | 1,02        |             |             |             |             |             |              |
|                                                                       |                     | 0,91        | 1,03        |             |             |             |             |             |             |              |
| Protease serine 1 (Fragment)                                          | Q86W19 Q86W19_HUMAN | 0,00        | 0,00        | 0,00        |             |             |             | 0,00        | 0,00        | 0,00         |
| Protease serine 2 isoform B                                           | Q7Z5F3 Q7Z5F3_HUMAN | <b>0,68</b> | 1,03        | 1,10        |             |             |             | 1,19        | 1,37        | <b>1,65</b>  |
|                                                                       |                     |             |             |             |             |             |             | <b>1,52</b> | <b>1,72</b> | 1,48         |
| Protease serine 2 preproprotein                                       | A6XMV9 A6XMV9_HUMAN |             |             |             |             |             |             |             |             |              |
| Protease, serine, 3                                                   | Q5VXV0 Q5VXV0_HUMAN |             |             |             | <b>1,52</b> | <b>1,50</b> | <b>1,68</b> |             |             |              |
| Proteasome (Prosome, macropain) 26S subunit, ATPase, 1                | Q6NW36 Q6NW36_HUMAN |             |             |             | 0,92        | 0,89        | <b>0,79</b> |             |             |              |
|                                                                       |                     |             |             |             | 0,89        | 0,96        | <b>0,74</b> |             |             |              |
| Proteasome (Prosome, macropain) 26S subunit, non-ATPase, 4 (Fragment) | Q5VWC4 Q5VWC4_HUMAN |             |             |             | 0,93        | 0,88        | <b>0,51</b> |             |             |              |
| Proteasome 26S ATPase subunit 5 variant (Fragment)                    | Q59GS3 Q59GS3_HUMAN |             |             |             | 1,02        | 0,96        | 1,19        |             |             |              |
| Proteasome 26S non-ATPase subunit 11 variant (Fragment)               | Q53FT5 Q53FT5_HUMAN |             |             |             | <b>0,58</b> | 0,96        | <b>0,67</b> |             |             |              |
| Proteasome 26S non-ATPase subunit 2 variant (Fragment)                | Q59EG8 Q59EG8_HUMAN | 1,05        | <b>2,63</b> | <b>8,80</b> | 0,85        | 0,90        | 0,75        |             |             |              |
|                                                                       |                     |             |             |             | 0,90        | 1,42        | <b>1,21</b> |             |             |              |
| Proteasome activator complex subunit 2                                | Q9UL46 PSME2_HUMAN  |             |             |             | 0,91        | 1,06        | 1,09        |             |             |              |
|                                                                       |                     |             |             |             | <b>0,61</b> | 1,05        | 1,19        |             |             |              |
| Proteasome beta 1 subunit variant (Fragment)                          | Q53FT8 Q53FT8_HUMAN |             |             |             | 0,95        | <b>1,15</b> | <b>1,35</b> |             |             |              |
|                                                                       |                     |             |             |             | 1,17        | 1,49        | 2,01        |             |             |              |
| Proteasome subunit alpha type                                         | Q5U0A0 Q5U0A0_HUMAN |             |             |             | 1,07        | 1,32        | <b>1,84</b> |             |             |              |
|                                                                       |                     |             |             |             | 0,92        | 0,95        | 1,13        |             |             |              |
| Proteasome subunit alpha type                                         | Q53XP2 Q53XP2_HUMAN |             |             |             | 1,06        | <b>1,30</b> | <b>1,60</b> |             |             |              |
|                                                                       |                     |             |             |             | 1,11        | 1,05        | 1,50        |             |             |              |
| Proteasome subunit alpha type                                         | Q6IB71 Q6IB71_HUMAN |             |             |             | 1,06        | 1,03        | <b>1,39</b> |             |             |              |
| Proteasome subunit alpha type (Fragment)                              | Q6ICS6 Q6ICS6_HUMAN |             |             |             |             |             |             |             |             |              |
|                                                                       |                     |             |             |             | 1,07        | <b>1,33</b> | 1,18        |             |             |              |
| Proteasome subunit alpha type (Fragment)                              | Q05DH1 Q05DH1_HUMAN |             |             |             | 1,01        | 1,11        | <b>1,47</b> |             |             |              |
|                                                                       |                     |             |             |             | 1,00        | 1,12        | 1,33        |             |             |              |
| Proteasome subunit alpha type-1                                       | P25786 PSA1_HUMAN   |             |             |             | 0,97        | 1,01        | <b>1,26</b> |             |             |              |
|                                                                       |                     |             |             |             | 0,93        | 1,08        | <b>1,26</b> |             |             |              |
| Proteasome subunit alpha type-6                                       | P60900 PSA6_HUMAN   |             |             |             | 1,23        | 0,93        | 1,06        |             |             |              |
|                                                                       |                     |             |             |             | 1,05        | 1,07        | 1,61        |             |             |              |
| Proteasome subunit beta type                                          | Q5JNW6 Q5JNW6_HUMAN |             |             |             | 1,06        | <b>1,35</b> | <b>1,61</b> |             |             |              |
|                                                                       |                     |             |             |             | 0,98        | 1,24        | 1,11        |             |             |              |
| Proteasome subunit beta type                                          | Q6IB22 Q6IB22_HUMAN |             |             |             | 0,89        | 1,07        | <b>1,32</b> |             |             |              |
|                                                                       |                     |             |             |             | 0,86        | <b>1,50</b> | <b>1,73</b> |             |             |              |
| Proteasome subunit beta type                                          | Q6IAT9 Q6IAT9_HUMAN |             |             |             |             |             |             |             |             |              |
|                                                                       |                     |             |             |             | 0,00        | 0,00        | 0,00        |             |             |              |
| Proteasome subunit beta type-2                                        | P49721 PSB2_HUMAN   |             |             |             | 1,18        | <b>1,20</b> | <b>1,41</b> |             |             |              |
| Proteasome subunit beta type-7 precursor                              | Q99436 PSB7_HUMAN   |             |             |             |             |             |             |             |             |              |
|                                                                       |                     |             |             |             | 0,98        | 1,11        | 1,49        |             |             |              |
| Protein ADRM1                                                         | Q16186 ADRM1_HUMAN  |             |             |             | 1,01        | 1,28        | 0,89        | 0,56        | 1,26        | 1,19         |
|                                                                       |                     |             |             |             | 0,86        | 0,78        | 0,70        |             |             |              |
| Protein ARMET precursor                                               | P55145 ARMET_HUMAN  | 1,03        | 1,12        | 0,99        |             |             |             | 0,91        | <b>1,54</b> | <b>1,84</b>  |
|                                                                       |                     | 1,02        | 1,13        |             |             |             |             | 1,04        | <b>2,93</b> | <b>4,00</b>  |
| Protein bassoon                                                       | Q9UPA5 BSN_HUMAN    | 0,72        | 0,96        |             |             |             |             |             |             |              |
| Protein beta-actin-like                                               | Q562R1 ACTBL_HUMAN  |             |             |             |             |             |             |             |             |              |
|                                                                       |                     |             |             |             | 0,00        | 0,00        | 0,00        |             |             |              |
| Protein BUD31 homolog                                                 | P41223 BUD31_HUMAN  |             |             |             |             |             |             | 0,00        | 0,00        | 0,00         |
| Protein C14orf166                                                     | Q9Y224 CN166_HUMAN  |             |             |             |             |             |             | 1,07        | <b>0,69</b> | <b>0,36</b>  |
|                                                                       |                     |             |             |             | 0,81        | 0,80        | 0,82        | 1,27        | <b>1,31</b> | <b>0,74</b>  |
| Protein canopy homolog 2 precursor                                    | Q9Y2B0 CNPY2_HUMAN  | 0,93        | 0,95        | 0,93        |             |             |             | 1,30        | <b>8,71</b> | <b>11,09</b> |
|                                                                       |                     | 1,01        | 1,18        |             | 0,00        | 0,00        | 0,00        |             |             |              |
| Protein canopy homolog 3 precursor                                    | Q9BT09 CNPY3_HUMAN  | 0,97        | 1,11        | 1,28        | 2,24        | 1,12        | 2,44        | 0,85        | 5,20        | 6,76         |
|                                                                       |                     | 0,94        | 0,93        |             | <b>1,84</b> | 1,23        | 1,72        |             |             |              |
| Protein CASP                                                          | Q13948 CASP_HUMAN   |             |             |             |             |             |             |             |             |              |
|                                                                       |                     | 1,09        | 1,09        |             |             |             |             |             |             |              |
| Protein cornichon homolog 4                                           | Q9P003 CNIH4_HUMAN  |             |             |             |             |             |             |             |             |              |
|                                                                       |                     | 0,00        | 0,00        |             |             |             |             |             |             |              |
| Protein CWC15 homolog                                                 | Q9P013 CWC15_HUMAN  |             |             |             |             |             |             | 1,02        | 0,45        | 0,30         |
|                                                                       |                     |             |             |             |             |             |             | 1,36        | <b>0,43</b> | 0,48         |
| Protein DEK                                                           | P35659 DEK_HUMAN    |             |             |             |             |             |             | 0,87        | <b>0,35</b> | <b>0,40</b>  |
|                                                                       |                     |             |             |             | 1,04        | 1,60        | 1,35        | <b>1,26</b> | <b>0,83</b> | 0,92         |
| Protein disulfide-isomerase A3 precursor                              | P30101 PDIA3_HUMAN  | <b>0,94</b> | 0,97        | 0,95        | <b>1,66</b> | 1,06        | <b>1,99</b> | 0,97        | <b>4,23</b> | <b>8,48</b>  |
|                                                                       |                     | <b>0,92</b> | <b>1,12</b> |             | 1,75        | <b>1,15</b> | 1,51        | <b>1,21</b> | <b>4,07</b> | <b>7,60</b>  |
| Protein disulfide-isomerase A5 precursor                              | Q14554 PDIA5_HUMAN  | 0,91        | 1,16        | 0,76        |             |             |             |             |             |              |
|                                                                       |                     | 0,96        | 1,00        |             |             |             |             |             |             |              |
| Protein disulfide-isomerase precursor                                 | P07237 PDIA1_HUMAN  | <b>0,92</b> | 1,00        | <b>0,90</b> | <b>1,64</b> | <b>1,13</b> | <b>2,14</b> | 0,85        | <b>1,78</b> | <b>3,25</b>  |
|                                                                       |                     | 0,97        | <b>1,18</b> |             | 1,77        | <b>1,22</b> | 1,71        | <b>0,70</b> | <b>1,68</b> | <b>3,09</b>  |
| Protein disulfide-isomerase TXNDC10 precursor                         | Q96JJ7 TXD10_HUMAN  | 0,87        | 1,22        | 1,18        |             |             |             |             |             |              |
|                                                                       |                     | 1,02        | 1,08        |             |             |             |             |             |             |              |
| Protein DJ-1                                                          | Q99497 PARK7_HUMAN  | 0,99        | 1,02        | <b>0,74</b> | <b>0,85</b> | <b>0,92</b> | <b>0,92</b> |             |             |              |
|                                                                       |                     | 1,08        | 0,92        |             | <b>0,74</b> | 0,90        | 0,92        |             |             |              |
| Protein dpy-19 homolog 2                                              | Q6NUT2 D19L2_HUMAN  |             |             |             | 0,00        | 0,00        | 0,00        |             |             |              |

|                                                                   |                     |              |              |       |    |  |              |              |              |              |              |              |
|-------------------------------------------------------------------|---------------------|--------------|--------------|-------|----|--|--------------|--------------|--------------|--------------|--------------|--------------|
| Protein dpy-30 homolog                                            | Q9C005 DPY30_HUMAN  |              |              |       |    |  |              | 0,96<br>1,24 | 0,38<br>0,95 | 0,28<br>0,60 |              |              |
| Protein EMI5 homolog, mitochondrial precursor                     | Q9NX18 EMI5_HUMAN   | 0,95         | 1,01         |       |    |  |              |              |              |              |              |              |
| Protein FAM105A                                                   | Q9NUU6 F105A_HUMAN  |              |              |       |    |  |              |              |              |              |              |              |
| Protein FAM134C                                                   | Q86VR2 F134C_HUMAN  | 0,00         | 0,00         | 0,00  |    |  |              |              |              |              |              |              |
| Protein FAM136A                                                   | Q96C01 F136A_HUMAN  | 0,98         | 0,89         |       |    |  |              |              |              |              |              |              |
| Protein FAM14A precursor                                          | Q9H2X8 FA14A_HUMAN  | 0,92         | 0,93         |       |    |  |              |              |              |              |              |              |
| Protein FAM3C precursor                                           | Q92520 FAM3C_HUMAN  | 1,02<br>1,02 | 0,65<br>1,02 | 0,77  |    |  |              | 1,33         | 2,23         | 4,08         |              |              |
| Protein FAM49B                                                    | Q9NUQ9 FA49B_HUMAN  | 1,39<br>1,36 | 1,09<br>1,00 | 1,16  |    |  |              | 0,83         | 0,86         | 0,69         |              |              |
| Protein FAM82A                                                    | Q96LZ7 FA82A_HUMAN  | 1,08         | 1,06         | 1,10  |    |  |              |              |              |              |              |              |
| Protein FAM82B                                                    | Q96DB5 FA82B_HUMAN  | 0,73<br>0,95 | 0,44<br>0,77 | 0,42  |    |  |              |              |              |              |              |              |
| Protein FAM82C                                                    | Q96TC7 FA82C_HUMAN  | 0,84<br>1,02 | 0,87<br>0,93 | 1,50  |    |  |              |              |              |              |              |              |
| Protein FAM91A1                                                   | Q658Y4 F91A1_HUMAN  |              |              |       |    |  | 0,00         | 0,00         | 0,00         |              |              |              |
| Protein GPR108 precursor                                          | Q9NPR9 GP108_HUMAN  | 1,28         | 0,86         | 0,98  |    |  |              |              |              |              |              |              |
| Protein jagunal homolog 1                                         | Q8N5M9 JAGN1_HUMAN  | 0,00<br>0,00 | 0,00<br>0,00 | 0,00  |    |  |              | 0,00<br>0,00 | 0,00<br>0,00 | 0,00<br>0,00 |              |              |
| Protein KIAA1524                                                  | Q8TCG1 K1524_HUMAN  |              |              |       |    |  | 0,66         | 0,65         | 0,73         |              |              |              |
| Protein kinase C and casein kinase substrate in neurons protein 2 | Q9UNF0 PACN2_HUMAN  |              |              |       |    |  | 0,64<br>0,72 | 0,80<br>0,86 | 0,77<br>0,87 | 0,92<br>0,95 | 1,61<br>1,83 | 1,60<br>1,70 |
| Protein kinase C beta type                                        | P05771 KPCB_HUMAN   | 0,00         | 0,00         | 0,00  |    |  |              |              |              |              |              |              |
| Protein kinase C, delta                                           | Q86XJ6 Q86XJ6_HUMAN | 0,95<br>1,45 | 1,61<br>1,46 | 3,18  |    |  | 0,83         | 0,81         | 0,60         |              |              |              |
| Protein LAP4                                                      | Q14160 LAP4_HUMAN   |              |              |       |    |  | 1,03         | 0,87         | 0,89         |              |              |              |
| Protein lunapark                                                  | Q9C0E8 LNP_HUMAN    | 1,29         | 1,70         |       |    |  |              |              |              |              |              |              |
| Protein LYRIC                                                     | Q86UE4 LYRIC_HUMAN  | 0,82<br>1,12 | 0,91<br>0,98 | 1,24  |    |  | 1,77<br>2,04 | 0,89<br>1,15 | 1,10<br>1,18 | 0,94<br>1,15 | 1,64<br>2,60 | 1,58<br>3,15 |
| Protein LZIC                                                      | Q8WZA0 LZIC_HUMAN   |              |              |       |    |  | 0,68<br>0,63 | 0,69<br>0,80 | 0,77<br>0,60 |              |              |              |
| Protein mago nashi homolog 2                                      | Q96A72 MGN2_HUMAN   |              |              |       |    |  |              |              |              | 0,75         | 0,34         | 0,15         |
| Protein MANBAL                                                    | Q9NQG1 MANBL_HUMAN  | 0,00         | 0,00         |       |    |  |              |              |              |              |              |              |
| Protein Niban                                                     | Q9BZQ8 NIBA_HUMAN   |              |              |       |    |  | 0,80         | 0,91         | 0,85         |              |              |              |
| Protein NipSnap homolog 1                                         | Q9BPW8 NIPS1_HUMAN  | 1,00<br>0,98 | 1,14<br>0,95 | 1,06  |    |  |              |              |              |              |              |              |
| Protein NipSnap homolog 3A                                        | Q9UFN0 NPS3A_HUMAN  | 0,00<br>0,00 | 0,00<br>0,00 | 0,00  |    |  |              |              |              |              |              |              |
| Protein ODR4 homolog                                              | Q5SWX8 ODR4_HUMAN   | 1,06         | 1,19         |       |    |  |              |              |              |              |              |              |
| Protein phosphatase 1A                                            | P35813 PPM1A_HUMAN  |              |              |       |    |  | 0,00         | 0,00         | 0,00         |              |              |              |
| Protein phosphatase 1 regulatory subunit 7                        | Q15435 PP1R7_HUMAN  |              |              |       |    |  | 0,66         | 0,91         | 0,95         |              |              |              |
| Protein phosphatase inhibitor 2                                   | P41236 IPP2_HUMAN   |              |              |       |    |  | 0,55         | 0,95         | 0,83         |              |              |              |
| Protein PPRC1                                                     | Q96M27 PPRC1_HUMAN  |              |              |       |    |  | 0,87<br>0,86 | 0,93<br>1,34 | 0,76<br>0,75 |              |              |              |
| Protein QIL1                                                      | Q5XKP0 QIL1_HUMAN   | 0,91<br>1,07 | 0,94<br>1,20 | 0,83  |    |  |              |              |              |              |              |              |
| Protein quaking                                                   | Q96PU8 QKI_HUMAN    |              |              |       |    |  |              |              |              | 1,32         | 0,33         | 0,32         |
| Protein RCC2                                                      | Q9P258 RCC2_HUMAN   | 0,00         | 0,00         | 0,00  |    |  | 0,89<br>1,31 | 1,67<br>1,49 | 0,87<br>1,04 | 0,20         | 0,43         | 0,31         |
| Protein RFT1 homolog                                              | Q96AA3 RFT1_HUMAN   | 0,87<br>0,92 | 0,97<br>1,00 | 1,32  |    |  |              |              |              |              |              |              |
| Protein S100-A10                                                  | P60903 S10AA_HUMAN  | 1,32<br>2,03 | 1,52<br>1,34 | 2,55  |    |  | 1,58<br>1,45 | 1,27<br>1,16 | 1,83<br>1,76 | 1,20<br>1,52 | 1,25<br>1,95 | 1,27<br>2,06 |
| Protein S100-A11                                                  | P31949 S10AB_HUMAN  | 2,09<br>3,15 | 2,10<br>2,62 | 3,33  |    |  | 1,33<br>0,97 | 1,05<br>0,91 | 1,40<br>1,15 | 1,89<br>0,72 | 2,09<br>1,05 | 1,44<br>0,93 |
| Protein S100-A13                                                  | Q99584 S10AD_HUMAN  |              |              |       |    |  | 0,94<br>0,71 | 0,94<br>0,91 | 1,10<br>0,95 | 1,08<br>1,15 | 1,74<br>2,60 | 1,78<br>2,69 |
| Protein S100-A4                                                   | P26447 S10A4_HUMAN  | 1,95<br>1,53 | 5,25<br>2,30 | 13,15 | </ |  |              |              |              |              |              |              |

|                                                                                  |                     |              |              |      |                      |                      |                      |              |           |
|----------------------------------------------------------------------------------|---------------------|--------------|--------------|------|----------------------|----------------------|----------------------|--------------|-----------|
| Protein XRP2                                                                     | O75695 XRP2_HUMAN   | 1,37<br>1,23 | 1,12<br>1,14 | 1,28 |                      |                      |                      |              |           |
| Protein YIPF3                                                                    | Q9GZM5 YIPF3_HUMAN  | 0,81<br>0,88 | 0,64<br>0,69 | 0,71 |                      |                      |                      |              |           |
| Protein YIPF4                                                                    | Q9BSR8 YIPF4_HUMAN  | 1,17         | 0,69         | 0,77 |                      |                      |                      |              |           |
| Protein YIPF5                                                                    | Q969M3 YIPF5_HUMAN  | 0,91         | 1,19         |      |                      |                      |                      |              |           |
| Protein YIPF6                                                                    | Q96EC8 YIPF6_HUMAN  | 1,14         | 0,97         |      |                      |                      |                      |              |           |
| Protein-L-isoaspartate(D-aspartate) O-methyltransferase                          | P22061 PIMT_HUMAN   | 0,84<br>0,86 | 0,93<br>0,62 |      |                      |                      |                      |              |           |
| Protein-tyrosine phosphatase mitochondrial 1, mitochondrial precursor            | Q8WUK0 PTPM1_HUMAN  | 1,05         | 0,87         | 0,61 |                      |                      |                      |              |           |
| Protein-tyrosine phosphatase-like member B                                       | Q6Y1H2 Q6Y1H2_HUMAN | 1,05         | 1,13         |      |                      |                      |                      |              |           |
| Protein-tyrosine sulfotransferase 2                                              | O60704 TPST2_HUMAN  | 1,10<br>0,95 | 0,75<br>1,01 | 1,02 |                      |                      |                      |              |           |
| Proteolipid protein 2                                                            | Q04941 PLP2_HUMAN   | 1,43<br>0,00 | 0,94<br>0,00 | 1,83 | 0,00<br>3,05         | 0,00<br>1,57         | 0,00<br>0,00         | 0,00<br>0,00 | 0,00      |
| Proteolysis inducing factor                                                      | Q53YJ2 Q53YJ2_HUMAN |              |              |      | 1,22                 | 2,56                 | 2,26                 |              |           |
| Prothymosin alpha                                                                | Q15202 Q15202_HUMAN |              |              |      | 0,45                 | 0,41                 | 0,31                 |              |           |
| Prothymosin alpha precursor                                                      | Q15254 Q15254_HUMAN | 0,00         | 0,00         | 0,00 |                      |                      |                      |              |           |
| Proto-oncogene tyrosine-protein kinase FGR                                       | P09769 FGR_HUMAN    | 1,07<br>1,35 | 1,05<br>1,37 | 1,46 |                      |                      |                      | 0,60         | 0,72 0,76 |
| Protoporphyrinogen oxidase                                                       | Q5VTW8 Q5VTW8_HUMAN | 1,05         | 0,85         |      |                      |                      |                      |              |           |
| PRP3 pre-mRNA processing factor 3 homolog                                        | Q5VT54 Q5VT54_HUMAN |              |              |      |                      |                      |                      | 0,99         | 0,40 0,24 |
| PRP4 pre-mRNA processing factor 4 homolog B                                      | Q8IVC3 Q8IVC3_HUMAN |              |              |      |                      |                      |                      | 0,76         | 0,70 0,61 |
| PRSS3 protein                                                                    | A1A508 A1A508_HUMAN | 0,49         | 0,80         | 1,02 |                      |                      |                      | 1,60         | 1,67 1,59 |
| P-selectin glycoprotein ligand 1 precursor                                       | Q14242 SELPL_HUMAN  |              |              |      |                      |                      |                      | 1,30         | 1,70 2,20 |
| PSMB4 protein                                                                    | Q6IBI4 Q6IBI4_HUMAN |              |              |      | 0,00<br>1,65         | 0,00<br>2,30         | 0,00<br>3,23         |              |           |
| PSMD3 protein                                                                    | Q6IBN0 Q6IBN0_HUMAN | 1,25<br>1,03 | 1,60<br>1,05 | 3,05 |                      |                      |                      |              |           |
| PSME1 protein                                                                    | Q6IBM2 Q6IBM2_HUMAN |              |              |      | 0,69                 | 1,03                 | 1,00                 |              |           |
| Pterin-4-alpha-carbinolamine dehydratase 2                                       | Q9H0N5 PHS2_HUMAN   | 1,14         | 1,04         | 0,99 |                      |                      |                      |              |           |
| Puromycin-sensitive aminopeptidase                                               | P55786 PSA_HUMAN    |              |              |      | 0,87<br>0,97         | 0,92<br>1,01         | 0,92<br>0,93         |              |           |
| Putative adenosylhomocysteinase 2                                                | O43865 SAHH2_HUMAN  | 1,36         | 1,86         | 4,05 | 0,94                 | 1,03                 | 0,98                 |              |           |
| Putative ATP-dependent Clp protease proteolytic subunit, mitochondrial precursor | Q16740 CLPP_HUMAN   | 1,13<br>0,95 | 1,12<br>1,02 | 0,76 |                      |                      |                      |              |           |
| Putative ATP-dependent RNA helicase DHX29                                        | Q7Z478 DHX29_HUMAN  |              |              |      | 0,00                 | 0,00                 | 0,00                 |              |           |
| Putative ATP-dependent RNA helicase DHX30                                        | Q7L2E3 DHX30_HUMAN  | 1,02         | 1,01         |      |                      |                      |                      |              |           |
| Putative eukaryotic translation initiation factor 1A                             | O75642 IF1AH_HUMAN  |              |              |      | 0,95                 | 0,79                 | 0,79                 |              |           |
| Putative GTP-binding protein 6                                                   | O43824 GTPB6_HUMAN  | 0,72<br>0,95 | 0,50<br>0,88 | 0,60 |                      |                      |                      |              |           |
| Putative metalloprotease C21orf57                                                | P58557 CU057_HUMAN  | 1,15         | 0,99         |      |                      |                      |                      |              |           |
| Putative methyltransferase NSUN4                                                 | Q96CB9 NSUN4_HUMAN  | 0,95         | 1,12         |      |                      |                      |                      |              |           |
| Putative phospholipase B-like 1 precursor                                        | Q6P4A8 PLBL1_HUMAN  | 1,19         | 1,56         | 1,52 | 1,74                 | 0,98                 | 2,22                 | 0,99         | 1,89 2,16 |
| Putative phospholipase B-like 2 precursor                                        | Q8NHP8 PLBL2_HUMAN  | 1,05<br>0,92 | 1,41<br>0,83 | 1,18 | 1,76<br>1,54         | 0,92<br>1,07         | 1,53<br>1,50         | 0,84         | 1,90 2,23 |
| Putative pre-mRNA-splicing factor ATP-dependent RNA helicase DHX15               | O43143 DHX15_HUMAN  |              |              |      | 1,40                 | 1,49                 | 1,41                 | 0,23         | 0,38 0,29 |
| Putative RNA-binding protein 15                                                  | Q96T37 RBM15_HUMAN  |              |              |      |                      |                      |                      | 1,29         | 1,01 1,10 |
| Putative RNA-binding protein 3                                                   | P98179 RBM3_HUMAN   |              |              |      |                      |                      |                      | 0,97         | 0,40 0,16 |
| Putative RNA-binding protein Luc7-like 2                                         | Q9Y383 LC7L2_HUMAN  |              |              |      |                      |                      |                      | 1,32         | 0,53 0,33 |
| Putative S-adenosyl-L-methionine-dependent methyltransferase METT5D1             | A6NJ78 ME5D1_HUMAN  | 0,00         | 0,00         |      |                      |                      |                      | 1,18         | 0,70 0,53 |
| Putative sodium-coupled neutral amino acid transporter 10                        | Q9HBR0 S38AA_HUMAN  | 0,97         | 0,96         |      |                      |                      |                      | 1,10         | 0,93 0,87 |
| Putative transferase C1orf69, mitochondrial precursor                            | Q5T440 CA069_HUMAN  | 1,00         | 0,98         |      |                      |                      |                      |              |           |
| Putative ubiquitin-conjugating enzyme E2 N-like                                  | Q5JXB2 UE2NL_HUMAN  |              |              |      | 0,78                 | 0,79                 | 0,76                 |              |           |
| Putative uncharacterized protein                                                 | Q86Z22 Q86Z22_HUMAN | 1,53<br>1,12 | 1,53<br>1,35 | 1,67 | 0,62<br>0,56         | 0,78<br>0,70         | 0,63<br>0,58         | 0,83         | 1,25 1,03 |
| Putative uncharacterized protein                                                 | Q9Y520 Q9Y520_HUMAN | 1,07         | 1,39         |      | 0,93                 | 0,87                 | 0,70                 | 0,91         | 0,77 0,57 |
| Putative uncharacterized protein                                                 | Q504R3 Q504R3_HUMAN |              |              |      |                      |                      |                      | 0,71         | 0,39 0,14 |
| Putative uncharacterized protein (Fragment)                                      | Q9BU08 Q9BU08_HUMAN | 1,13         | 1,59         | 3,97 |                      |                      |                      | 1,23         | 1,11 0,87 |
| Putative uncharacterized protein (Fragment)                                      | Q8TBW1 Q8TBW1_HUMAN |              |              |      | 1,09                 | 0,84                 | 0,77                 |              |           |
| Putative uncharacterized protein (Fragment)                                      | Q96C20 Q96C20_HUMAN |              |              |      | 0,73                 | 0,54                 | 0,46                 | 1,65         | 8,33 5,15 |
| Putative uncharacterized protein (Fragment)                                      | Q59ED7 Q59ED7_HUMAN | 1,18         | 1,32         |      | 1,92                 | 1,07                 | 1,08                 |              |           |
| Putative uncharacterized protein (Fragment)                                      | Q8TBT6 Q8TBT6_HUMAN | 0,97         | 0,97         |      |                      |                      |                      |              |           |
| Putative uncharacterized protein (Fragment)                                      | Q9UEL4 Q9UEL4_HUMAN | 1,16         | 1,82         |      |                      |                      |                      |              |           |
| Putative uncharacterized protein DKFZp451D234                                    | Q86TB8 Q86TB8_HUMAN |              |              |      | 1,16<br>0,86         | 1,19<br>1,12         | 1,34<br>0,95         |              |           |
| Putative uncharacterized protein DKFZp547A0616 (Fragment)                        | Q5JQ44 Q5JQ44_HUMAN | 1,14         | 0,91         | 0,97 |                      |                      |                      |              |           |
| Putative uncharacterized protein DKFZp547L106                                    | Q9H023 Q9H023_HUMAN |              |              |      |                      |                      |                      |              |           |
| Putative uncharacterized protein DKFZp564E242                                    | Q659F9 Q659F9_HUMAN |              |              |      | 0,81<br>0,72<br>0,97 | 0,58<br>0,77<br>0,78 | 0,37<br>0,79<br>0,83 |              |           |
| Putative uncharacterized protein DKFZp564G0422                                   | Q5JXL8 Q5JXL8_HUMAN |              |              |      |                      |                      |                      | 1,18         | 1,88 3,01 |
| Putative uncharacterized protein DKFZp564H1664                                   | Q659E8 Q659E8_HUMAN |              |              |      | 2,01                 | 1,33                 | 1,53                 |              |           |
| Putative uncharacterized protein DKFZp566H1924 (Fragment)                        | Q9UFM8 Q9UFM8_HUMAN | 1,07         | 1,12         |      |                      |                      |                      |              |           |
| Putative uncharacterized protein DKFZp586G1517 (Fragment)                        | Q9UFU8 Q9UFU8_HUMAN | 1,01         | 0,99         |      |                      |                      |                      |              |           |
| Putative uncharacterized protein DKFZp666O168                                    | Q658R4 Q658R4_HUMAN |              |              |      | 0,76                 | 0,84                 | 0,56                 |              |           |

|                                                                                |                     |             |             |              |             |             |             |             |             |
|--------------------------------------------------------------------------------|---------------------|-------------|-------------|--------------|-------------|-------------|-------------|-------------|-------------|
| Guanine nucleotide-binding protein G(I)/G(S)/G(O) subunit gamma-2              | P59768 GBG2_HUMAN   | 0,00        | 0,00        |              |             |             |             |             |             |
| Putative uncharacterized protein DKFZp686B04128                                | Q68D08 Q68D08_HUMAN |             |             |              | 0,81        | 0,99        | 0,92        |             |             |
| Putative uncharacterized protein DKFZp686D0880 (Fragment)                      | Q6N0B1 Q6N0B1_HUMAN |             |             |              | 1,02        | 1,06        | <b>1,41</b> |             |             |
| Putative uncharacterized protein DKFZp686E12175                                | Q68DQ7 Q68DQ7_HUMAN |             |             |              | 1,78        | <b>1,57</b> | 1,98        |             |             |
|                                                                                |                     |             |             |              | 0,79        | 0,58        | 0,85        |             |             |
|                                                                                |                     |             |             |              | <b>0,74</b> | 0,84        | 0,84        |             |             |
| Putative uncharacterized protein DKFZp686E2459                                 | Q7Z3D7 Q7Z3D7_HUMAN |             |             |              |             |             |             | 0,84        | 0,54        |
|                                                                                |                     |             |             |              |             |             |             | 1,06        | 0,79        |
| Putative uncharacterized protein DKFZp686G04235                                | Q63HL4 Q63HL4_HUMAN | 0,97        | <b>1,27</b> | <b>1,65</b>  |             |             |             |             |             |
| Mitochondrial 28S ribosomal protein S29                                        | P51398 RT29_HUMAN   | 0,99        | 0,99        | 0,89         |             |             |             |             |             |
|                                                                                |                     | 0,90        | 1,00        |              |             |             |             |             |             |
| IgG receptor FcRn large subunit p51 precursor                                  | P55899 FCGRN_HUMAN  | 0,84        | 0,66        | 0,86         |             |             |             |             |             |
|                                                                                |                     | 0,94        | <b>0,79</b> |              |             |             |             |             |             |
| Putative uncharacterized protein DKFZp686I0746                                 | Q6MZZ3 Q6MZZ3_HUMAN | 1,07        | 0,86        |              | 1,07        | 1,10        | 1,04        |             |             |
| Putative uncharacterized protein DKFZp686J1372                                 | Q5HYB6 Q5HYB6_HUMAN | <b>1,71</b> | <b>2,04</b> |              |             |             |             | <b>2,09</b> | <b>2,82</b> |
|                                                                                |                     |             |             |              |             |             |             |             | <b>3,37</b> |
| Putative uncharacterized protein DKFZp686K08109                                | Q7Z3S1 Q7Z3S1_HUMAN | 0,96        | 0,98        |              |             |             |             |             |             |
| Putative uncharacterized protein DKFZp686L0869                                 | Q7Z3U5 Q7Z3U5_HUMAN | 1,52        | 1,28        | <b>3,60</b>  | 0,89        | 1,08        | 0,91        |             |             |
| Putative uncharacterized protein DKFZp686M09245                                | Q6MZV5 Q6MZV5_HUMAN |             |             |              | <b>0,62</b> | 1,04        | 1,02        | 1,57        | 2,99        |
|                                                                                |                     |             |             |              | 0,44        | 0,69        | 0,58        | 0,94        | 2,04        |
| Isocitrate dehydrogenase [NADP] cytoplasmic                                    | O75874 IDHC_HUMAN   |             |             |              | <b>0,84</b> | 0,98        | <b>0,83</b> |             |             |
| Putative uncharacterized protein DKFZp686M1669                                 | Q68E10 Q68E10_HUMAN | 1,03        | 1,57        | 3,33         |             |             |             | 1,25        | <b>1,78</b> |
|                                                                                |                     |             |             |              | <b>1,35</b> | 0,83        | 0,76        | 0,00        | 0,00        |
| Putative uncharacterized protein DKFZp686M22160 (Fragment)                     | Q7Z349 Q7Z349_HUMAN | 0,79        | 1,00        | 1,31         |             |             |             |             |             |
|                                                                                |                     | 1,08        | 0,99        |              |             |             |             |             |             |
| Putative uncharacterized protein DKFZp686N1815 (CASP3)                         | Q5HYI3 Q5HYI3_HUMAN |             |             |              | 0,00        | 0,00        | 0,00        |             |             |
| Putative uncharacterized protein DKFZp779B2258                                 | Q68D48 Q68D48_HUMAN |             |             |              | 0,67        | <b>0,81</b> | 0,78        |             |             |
| Putative uncharacterized protein DKFZp779I1858                                 | Q68D50 Q68D50_HUMAN | 0,91        | 0,78        | <b>0,68</b>  |             |             |             |             |             |
| Putative uncharacterized protein DKFZp779L0468                                 | Q68DQ4 Q68DQ4_HUMAN | 0,93        | 0,83        | 1,63         | 0,91        | 0,96        | 0,96        |             |             |
| Putative uncharacterized protein DKFZp779P1227                                 | Q68DW4 Q68DW4_HUMAN |             |             |              |             |             |             | 1,47        | 1,63        |
| Putative uncharacterized protein DKFZp781B1032                                 | Q68DD1 Q68DD1_HUMAN | 1,06        | 0,93        | 1,00         |             |             |             | 0,72        | 1,85        |
|                                                                                |                     |             |             |              |             |             |             | 0,95        | 1,91        |
| Putative uncharacterized protein DKFZp781C0423 (Fragment)                      | Q68DD9 Q68DD9_HUMAN |             |             |              |             |             |             | 0,98        | 0,59        |
|                                                                                |                     |             |             |              |             |             |             | <b>0,73</b> | <b>0,44</b> |
| Beta-hexoaminidase alpha chain precursor                                       | P06865 HEXA_HUMAN   | 1,03        | <b>0,78</b> |              | <b>1,70</b> | 1,01        | 1,11        |             |             |
| Putative uncharacterized protein DKFZp781K0743                                 | P42765 THIM_HUMAN   |             |             |              |             |             |             | 1,16        | 0,92        |
|                                                                                |                     |             |             |              |             |             |             |             | <b>2,10</b> |
| Putative uncharacterized protein DKFZp781N1372                                 | Q68CQ5 Q68CQ5_HUMAN |             |             |              | 0,89        | 0,90        | 0,95        |             |             |
| Protein disulfide-isomerase A4 precursor                                       | P13667 PDIA4_HUMAN  | 0,94        | 1,04        | <b>0,91</b>  | <b>1,59</b> | <b>1,15</b> | <b>2,00</b> | 0,76        | 1,10        |
|                                                                                |                     | <b>0,94</b> | <b>1,12</b> |              | 2,02        | 1,43        | 1,91        | 0,95        | <b>1,83</b> |
|                                                                                | P43304 GPDH_HUMAN   |             |             |              |             |             |             | 0,77        | <b>2,95</b> |
| Glycerol-3-phosphate dehydrogenase, mitochondrial precursor                    |                     |             |             |              |             |             |             | 0,85        | 1,25        |
| General transcription factor II-I                                              | P78347 GTF21_HUMAN  |             |             |              |             |             |             | 0,94        | <b>0,25</b> |
|                                                                                |                     |             |             |              |             |             |             | <b>0,75</b> | <b>0,46</b> |
| Putative uncharacterized protein HDLBP                                         | Q53QU2 Q53QU2_HUMAN |             |             |              | 1,38        | 0,90        | 0,79        |             | <b>0,37</b> |
| Putative uncharacterized protein ITGA6                                         | Q53RX7 Q53RX7_HUMAN | 1,00        | <b>0,54</b> | <b>0,63</b>  |             |             |             |             |             |
| Putative uncharacterized protein LOC552891                                     | Q96BN9 Q96BN9_HUMAN | 0,00        | 0,00        | 0,00         |             |             |             |             |             |
| U6 snRNA-associated Sm-like protein LSM6                                       | P62312 LSM6_HUMAN   |             |             |              |             |             |             | 0,84        | <b>0,44</b> |
|                                                                                |                     |             |             |              |             |             |             | 1,15        | <b>0,52</b> |
| Mitochondrial 28S ribosomal protein S5                                         | P82675 RT05_HUMAN   | 0,90        | 1,06        | 0,95         |             |             |             |             | <b>0,49</b> |
|                                                                                |                     | 1,07        | <b>0,91</b> |              |             |             |             |             |             |
| Putative uncharacterized protein Nbla03646                                     | Q3LIE7 Q3LIE7_HUMAN |             |             |              |             |             |             | 0,26        | 2,08        |
| 26S protease regulatory subunit 7                                              | P35998 PRS7_HUMAN   |             |             |              |             |             |             |             | <b>3,26</b> |
|                                                                                |                     |             |             |              | 0,88        | 0,92        | 0,65        |             |             |
| Protein disulfide-isomerase A6 precursor                                       | Q15084 PDTA6_HUMAN  | 0,99        | 0,95        | 0,96         | <b>1,63</b> | 0,98        | <b>1,77</b> | 1,21        | <b>2,73</b> |
|                                                                                |                     | <b>0,88</b> | 1,05        |              | 1,84        | 1,16        | <b>1,69</b> | <b>1,29</b> | <b>3,01</b> |
| Poly(rc)-binding protein 1                                                     | Q15365 PCBP1_HUMAN  | 0,82        | 2,81        | 4,97         | <b>0,73</b> | <b>0,80</b> | <b>0,57</b> | 0,90        | <b>0,49</b> |
|                                                                                |                     |             |             |              | 0,88        | 0,58        | <b>0,60</b> | 0,67        | 0,63        |
| Putative uncharacterized protein PSMC2 (Fragment)                              | Q75L23 Q75L23_HUMAN | 2,15        | <b>5,71</b> | <b>16,54</b> |             |             |             |             | <b>0,42</b> |
| Putative uncharacterized protein PTPN18                                        | Q53P42 Q53P42_HUMAN |             |             |              |             |             |             |             |             |
|                                                                                |                     |             |             |              | 0,00        | 0,00        | 0,00        |             |             |
| Ras-related protein Rab-10                                                     | P61026 RAB10_HUMAN  |             |             |              |             |             |             | <b>0,31</b> | <b>1,73</b> |
|                                                                                |                     |             |             |              |             |             |             |             | <b>2,43</b> |
| Alpha-synuclein                                                                | P37840 SYUA_HUMAN   |             |             |              | 0,83        | 0,71        | 0,49        |             |             |
|                                                                                |                     |             |             |              | 0,68        | 0,80        | 0,64        |             |             |
| Putative uncharacterized protein UNQ6490/PRO21339 precursor                    | Q6UXU1 YC002_HUMAN  | 0,00        | 0,00        |              |             |             |             |             |             |
| Putative uncharacterized protein WASPIP                                        | Q53TA9 Q53TA9_HUMAN |             |             |              | 0,67        | <b>0,66</b> | 0,67        | 1,01        | 1,04        |
|                                                                                |                     |             |             |              |             |             |             |             | 0,66        |
| ATP-dependent DNA helicase 2 subunit 2                                         | P13010 KU86_HUMAN   |             |             |              | 1,05        | 1,71        | <b>1,77</b> | <b>0,63</b> | <b>1,43</b> |
|                                                                                |                     |             |             |              |             |             |             |             | <b>1,50</b> |
| Pyridoxal kinase                                                               | Q00764 PDXX_HUMAN   |             |             |              | <b>0,82</b> | 0,96        | 0,79        |             |             |
| Pyroline-5-carboxylate reductase 2                                             | Q96C36 P5CR2_HUMAN  |             |             |              |             |             |             |             |             |
|                                                                                |                     | 1,01        | 0,88        |              |             |             |             |             |             |
| Pyruvate carboxylase, mitochondrial precursor                                  | P11498 PYC_HUMAN    | 0,93        | <b>0,88</b> | <b>0,80</b>  |             |             |             |             |             |
|                                                                                |                     | 0,94        | <b>0,89</b> |              | 0,00        | 0,00        | 0,00        |             |             |
| Pyruvate dehydrogenase (Lipoamide) alpha 1                                     | Q5JPT8 Q5JPT8_HUMAN | <b>0,89</b> | <b>0,89</b> | <b>0,76</b>  |             |             |             |             | 9999,00     |
| Pyruvate dehydrogenase E1 component subunit beta, mitochondrial precursor      | P11177 ODPB_HUMAN   | 0,94        | 0,94        | <b>0,74</b>  |             |             |             |             |             |
|                                                                                |                     | 0,99        | 0,94        |              | 0,00        | 0,00        | 0,00        |             |             |
| Pyruvate dehydrogenase phosphatase regulatory subunit, mitochondrial precursor | Q8NCN5 PDPR_HUMAN   | 1,07        | 1,09        |              |             |             |             |             |             |
| Pyruvate dehydrogenase protein X component, mitochondrial precursor            | Q00330 ODPX_HUMAN   | <b>0,85</b> | 0,95        | <b>0,78</b>  |             |             |             |             |             |
|                                                                                |                     | 1,01        | 1,00        |              |             |             |             |             |             |
| Pyruvate kinase                                                                | A6NFK3 A6NFK3_HUMAN |             |             |              |             | 0,86        | 1,03        |             |             |
| Pyruvate kinase isozymes M1/M2                                                 | P14618 KPYM_HUMAN   | 1,21        | <b>1,58</b> | <b>2,85</b>  | 0,00        | 0,00        | 0,00        | <b>1,92</b> | <b>2,61</b> |
|                                                                                |                     | <b>1,40</b> | <b>1,59</b> |              | 0,99        | 1,18        | 1,24        | 0,37        | 1,07        |
| QARS protein (Fragment)                                                        | Q9BUZ3 Q9BUZ3_HUMAN |             |             |              | 0,83        | 1,08        | <b>0,78</b> |             |             |
| Quinone oxidoreductase                                                         | Q08257 QOR_HUMAN    |             |             |              |             |             |             |             |             |
|                                                                                |                     | 0,95        | 0,89        |              |             |             |             |             |             |
| Rab11 family-interacting protein 1                                             | Q6WKZ4 RFIP1_HUMAN  | 0,80        | 1,04        | 0,99         | 1,30        | 1,18        | 0,99        | <b>0,77</b> | <b>0,47</b> |
|                                                                                |                     | 1,05        | 0,90        |              | 1,47        | 1,16        | 1,02        |             | <b>0,28</b> |
| RAB11B protein                                                                 | Q6FI42 Q6FI42_HUMAN | 0,95        | 0,95        | 0,96         | <b>1,56</b> | <b>1,26</b> | <b>1,34</b> | 1,24        | <b>3,59</b> |
|                                                                                |                     | 1,00        | 1,00        |              | 1,48        | 1,10        | 1,30        | 1,40        | 1,62        |
| RAB13 protein (Fragment)                                                       | Q504R6 Q504R6_HUMAN | 1,01        | 1,02        | <b>1,29</b>  |             |             |             |             | 3,53        |
|                                                                                |                     | 0,99        | 1,09        |              |             |             |             |             |             |

|                                                                |                     |                            |                            |             |                            |                            |                            |                            |                            |                            |
|----------------------------------------------------------------|---------------------|----------------------------|----------------------------|-------------|----------------------------|----------------------------|----------------------------|----------------------------|----------------------------|----------------------------|
| RAB1A, member RAS oncogene family                              | Q5U0I6 Q5U0I6_HUMAN | 0,93<br>0,99               | 0,85<br><b>1,14</b>        | 0,97        | <b>1,65</b><br>1,54        | <b>1,33</b><br>1,20        | 1,17<br>1,01               | 1,45<br>0,77               | 3,38<br><b>3,01</b>        | <b>7,32</b><br><b>6,20</b> |
| RAB27A protein                                                 | Q6IAS8 Q6IAS8_HUMAN | 1,02                       | <b>1,24</b>                |             |                            |                            |                            |                            |                            |                            |
| RAB31, member RAS oncogene family variant (Fragment)           | Q53EY4 Q53EY4_HUMAN |                            |                            |             | 1,36                       | 0,79                       | 0,77                       |                            |                            |                            |
| RAB5A protein                                                  | Q6FI44 Q6FI44_HUMAN | 0,00<br>1,09               | 0,00<br>1,28               | 0,00        |                            |                            |                            |                            |                            |                            |
| RAB5B protein                                                  | Q6FI54 Q6FI54_HUMAN |                            |                            |             | 0,00                       | 0,00                       | 0,00                       |                            |                            |                            |
| RAB5C protein                                                  | Q6FH55 Q6FH55_HUMAN | 0,99<br>0,94               | 1,19<br><b>1,26</b>        | 1,33        | <b>2,37</b><br><b>1,50</b> | <b>1,42</b><br>0,95        | 1,33<br>0,95               | 1,10<br>0,00               | 1,15<br>0,00               | 0,90<br>0,00               |
| RAB6A, member RAS oncogene family isoform a variant (Fragment) | Q53ET8 Q53ET8_HUMAN | <b>1,14</b>                | <b>0,81</b>                | <b>0,84</b> |                            |                            |                            |                            |                            |                            |
| RAB8A protein                                                  | Q6FHV5 Q6FHV5_HUMAN | 1,10<br><b>1,23</b>        | 0,87<br><b>1,32</b>        | 1,47        |                            |                            |                            |                            |                            |                            |
| RABGGTB protein                                                | Q6IB63 Q6IB63_HUMAN |                            |                            |             | 0,00                       | 0,00                       | 0,00                       |                            |                            |                            |
| Rab GTPase-binding effector protein 2                          | Q9H5N1 RABE2_HUMAN  |                            |                            |             | 0,00                       | 0,00                       | 0,00                       |                            |                            |                            |
| Radical S-adenosyl methionine domain-containing protein 2      | Q8WXC1 RSAD2_HUMAN  | <b>4,71</b>                | <b>7,63</b>                | <b>8,41</b> |                            |                            |                            |                            |                            |                            |
| RAN binding protein 1 variant (Fragment)                       | Q53EY3 Q53EY3_HUMAN |                            |                            |             | 1,01<br>0,00               | 1,10<br>0,00               | 0,79<br>0,00               |                            |                            |                            |
| RAN binding protein 5                                          | Q86XC7 Q86XC7_HUMAN |                            |                            |             | 0,81                       | 0,85                       | 0,76                       |                            |                            |                            |
| RAP1, GTP-GDP dissociation stimulator 1                        | Q9BUX6 Q9BUX6_HUMAN |                            |                            |             | 0,71                       | 0,89                       | 0,37                       |                            |                            |                            |
| RAP1A, member of RAS oncogene family                           | Q5U0C3 Q5U0C3_HUMAN | 0,00<br>1,11               | 0,00<br>1,10               | 0,00        |                            |                            |                            | <b>1,58</b>                | <b>2,93</b>                | <b>4,00</b>                |
| Ras GTPase-activating protein-binding protein 2                | Q9UN86 G3BP2_HUMAN  |                            |                            |             | 2,05<br><b>2,06</b>        | 1,24<br>1,12               | 0,87<br>1,15               | <b>0,70</b>                | <b>0,43</b>                | <b>0,23</b>                |
| Ras GTPase-activating-like protein IQGAP1                      | P46940 IQGA1_HUMAN  | <b>1,24</b><br><b>1,74</b> | 0,96<br><b>1,15</b>        | <b>1,67</b> | <b>0,89</b><br>1,09        | 1,05<br><b>1,22</b>        | 0,94<br>1,04               | <b>1,19</b><br><b>0,38</b> | <b>0,82</b><br><b>0,62</b> | 1,18<br><b>0,56</b>        |
| Ras GTPase-activating-like protein IQGAP2                      | Q13576 IQGA2_HUMAN  | 1,31<br>1,07               | <b>2,33</b><br>0,94        | <b>4,77</b> | 0,86                       | 1,10                       | 0,96                       |                            |                            |                            |
| Ras homolog gene family, member A variant (Fragment)           | Q53HM4 Q53HM4_HUMAN | 1,04<br><b>1,46</b>        | <b>1,22</b><br><b>1,53</b> | <b>1,69</b> | 1,06<br>1,04               | <b>0,82</b><br><b>0,87</b> | <b>0,75</b><br><b>0,59</b> |                            |                            |                            |
| Ras-related C3 botulinum toxin substrate 1                     | A4D2P0 A4D2P0_HUMAN |                            |                            |             |                            |                            |                            | <b>0,53</b>                | 1,55                       | 1,75                       |
| Ras-related C3 botulinum toxin substrate 1 precursor           | P63000 RAC1_HUMAN   | 1,13                       | <b>0,85</b>                |             |                            |                            |                            |                            |                            |                            |
| Ras-related C3 botulinum toxin substrate 2 precursor           | P15153 RAC2_HUMAN   | 0,95<br><b>1,22</b>        | <b>1,23</b><br><b>1,40</b> | <b>1,78</b> | 1,24<br><b>1,32</b>        | 0,88<br><b>0,69</b>        | <b>0,66</b><br><b>0,60</b> | <b>1,38</b>                | <b>2,37</b>                | <b>4,63</b>                |
| Ras-related GTP-binding protein C                              | Q9HB90 RRAGC_HUMAN  | 3,55                       | 6,36                       | 6,85        |                            |                            |                            |                            |                            |                            |
| Ras-related protein Rab-10                                     | P61026 RAB10_HUMAN  | 1,08<br>1,02               | 1,10<br>1,04               | 1,00        | 1,72<br><b>1,84</b>        | 1,15<br>1,17               | 1,35<br>1,24               | 1,37                       | 1,82                       | <b>2,99</b>                |
| Ras-related protein Rab-14                                     | P61106 RAB14_HUMAN  | 1,06<br>1,09               | 1,16<br>1,07               | <b>1,46</b> | <b>1,79</b>                | <b>1,32</b>                | 1,16                       | 1,88                       | <b>3,18</b>                | <b>6,54</b>                |
| Ras-related protein Rab-18                                     | Q9NP72 RAB18_HUMAN  | 0,96<br>0,93               | 0,93<br>0,89               | 1,15        |                            |                            |                            |                            |                            |                            |
| Ras-related protein Rab-1B                                     | Q9H0U4 RAB1B_HUMAN  | 1,03<br><b>1,28</b>        | 1,07<br><b>1,28</b>        | <b>1,46</b> | 1,27<br><b>1,58</b>        | 0,90<br>1,06               | 0,83<br>0,90               | 1,13<br>1,24               | <b>2,87</b><br><b>3,24</b> | <b>5,60</b><br><b>5,38</b> |
| Ras-related protein Rab-21                                     | Q9UL25 RAB21_HUMAN  | 1,13<br>0,95               | 1,20<br>1,16               | 0,95        |                            |                            |                            |                            |                            |                            |
| Ras-related protein Rab-24                                     | Q969Q5 RAB24_HUMAN  |                            |                            |             |                            |                            |                            |                            |                            |                            |
| Ras-related protein Rab-27A                                    | P51159 RB27A_HUMAN  | 1,04                       | 1,17                       | 1,41        |                            |                            |                            |                            |                            |                            |
| Ras-related protein Rab-2A                                     | P61019 RAB2A_HUMAN  | 1,09<br>1,00               | 0,84<br>1,01               | 0,79        |                            |                            |                            |                            |                            |                            |
| Ras-related protein Rab-31                                     | Q13636 RAB31_HUMAN  | 0,89<br>1,07               | <b>0,83</b><br>1,05        | 1,09        |                            |                            |                            |                            |                            |                            |
| Ras-related protein Rab-32                                     | Q13637 RAB32_HUMAN  | 0,98<br>1,03               | 1,00<br>1,08               | 0,86        |                            |                            |                            |                            |                            |                            |
| Ras-related protein Rab-35                                     | Q15286 RAB35_HUMAN  | 1,17<br>1,08               | 1,00<br>1,12               | 1,38        |                            |                            |                            |                            |                            |                            |
| Ras-related protein Rab-3D                                     | O95716 RAB3D_HUMAN  | 1,16                       | 1,23                       | 1,97        |                            |                            |                            |                            |                            |                            |
| Ras-related protein Rab-4B                                     | P61018 RAB4B_HUMAN  | 1,28                       | 1,37                       | <b>1,22</b> |                            |                            |                            |                            |                            |                            |
| Ras-related protein Rab-5B                                     | P61020 RAB5B_HUMAN  | 0,84<br>1,02               | 1,54<br>0,74               | <b>2,84</b> |                            |                            |                            |                            |                            |                            |
| Ras-related protein Rab-6A                                     | P20340 RAB6A_HUMAN  |                            |                            |             |                            |                            |                            |                            |                            |                            |
| Ras-related protein Rab-7a                                     | P51149 RAB7A_HUMAN  | 1,10<br>0,99               | 0,98<br>0,97               | 0,93        |                            |                            |                            |                            |                            |                            |
| Ras-related protein Rab-7A                                     | P51149 RAB7A_HUMAN  | 1,01<br><b>1,07</b>        |                            |             | <b>1,81</b><br>2,07        | 0,83<br>1,13               | 1,08<br>1,18               | 0,83<br>0,83               | <b>4,42</b><br><b>2,83</b> | <b>6,31</b><br><b>5,36</b> |
| Ras-related protein Rab-8B                                     | Q92930 RAB8B_HUMAN  | 1,14<br>1,15               | 1,10<br>1,10               | 1,04        |                            |                            |                            |                            |                            |                            |
| Ras-related protein Rab-9A                                     | P51151 RAB9A_HUMAN  |                            |                            |             |                            |                            |                            |                            |                            |                            |
| Ras-related protein Ral-A precursor                            | P11233 RALA_HUMAN   | 0,82<br>1,06               | 0,99<br>0,96               | 0,98        |                            |                            |                            | 1,31                       | 1,90                       | 2,49                       |
| Ras-related protein Ral-B precursor                            | P11234 RALB_HUMAN   | 1,05<br><b>1,18</b>        |                            |             |                            |                            |                            |                            |                            |                            |
| Ras-related protein Rap-1b precursor                           | P61224 RAP1B_HUMAN  | 1,81<br>1,10               | <b>1,50</b><br>0,99        | 1,82        |                            |                            |                            |                            |                            |                            |
| Ras-related protein Rap-1b precursor                           | P61224 RAP1B_HUMAN  | 1,20<br>1,30               | 1,25<br>1,24               | 1,56        | <b>1,83</b><br>2,45        | <b>0,87</b><br><b>1,25</b> | 0,89<br>1,19               | 1,13                       | 1,93                       | <b>2,74</b>                |
| Ras-related protein Rap-2b precursor                           | P61225 RAP2B_HUMAN  | <b>1,21</b>                | 1,04                       |             |                            |                            |                            |                            |                            |                            |
| RBM25 protein (Fragment)                                       | A0PJL9 A0PJL9_HUMAN |                            |                            |             |                            |                            |                            | 0,84                       | <b>0,74</b>                | <b>0,62</b>                |
| Receptor expression-enhancing protein 5                        | Q00765 REEP5_HUMAN  | <b>0,63</b><br>1,08        | 0,90<br><b>1,19</b>        | 1,01        | <b>1,72</b><br>2,11        | 0,89<br>1,23               | 0,98<br>1,24               |                            |                            |                            |
| Receptor-type tyrosine-protein phosphatase eta precursor       | Q12913 PTPRJ_HUMAN  | 1,18                       | 1,12                       |             |                            |                            |                            |                            |                            |                            |
| Regulator of G-protein signaling 10                            | O43665 RGS10_HUMAN  |                            |                            |             | 0,85                       | 1,03                       | 0,76                       |                            |                            |                            |
| Regulator of G-protein signaling 14                            | O43666 RGS14_HUMAN  |                            |                            |             | 0,72                       | 0,61                       | 0,47                       |                            |                            |                            |
| Renin receptor precursor                                       | O75787 RENH_HUMAN   | 0,83<br>0,83               | 0,80<br>0,91               | 0,81        |                            |                            |                            | 1,54<br>1,92               | <b>3,08</b><br>2,39        | <b>3,70</b><br>3,86        |
| Replication protein A 70 kDa DNA-binding subunit               | P27694 RFA1_HUMAN   |                            |                            |             | 0,85                       | 0,98                       | 0,89                       |                            |                            |                            |
| RER1 protein                                                   | Q9P0H9 Q9P0H9_HUMAN | 1,45<br>1,02               | 1,05<br><b>0,87</b>        | 1,11        |                            |                            |                            |                            |                            |                            |
| Ret finger protein-like 4A                                     | A6NLU0 RFPLA_HUMAN  |                            |                            |             | 0,80                       | 0,85                       | 0,87                       |                            |                            |                            |
| Reticulocalbin 2, EF-hand calcium binding domain               | Q53XN8 Q53XN8_HUMAN |                            |                            |             |                            |                            |                            |                            |                            |                            |
| Reticulocalbin-1 precursor                                     | Q15293 RCN1_HUMAN   | 0,98<br>0,92               | 1,02<br>0,95               | 0,88        |                            |                            |                            |                            |                            |                            |
| Reticulocalbin-1 precursor                                     | Q15293 RCN1_HUMAN   | 1,03<br><b>1,14</b>        |                            |             | 1,19                       | 1,28                       | 1,95                       |                            |                            |                            |
| Reticulocalbin-1                                               | Q16799 RTN1_HUMAN   | 1,00<br>1,04               | 1,30<br>1,03               | <b>1,71</b> | <b>2,10</b><br><b>1,82</b> | 1,48<br><b>1,31</b>        | 1,54<br><b>1,39</b>        |                            |                            |                            |
| Reticulocalbin-3                                               | O95197 RTN3_HUMAN   | 0,70<br>0,93               | 0,86<br>1,39               | 1,04        |                            |                            |                            | <b>0,70</b>                | 2,10                       | <b>2,75</b>                |
| Reticulocalbin-4                                               | Q9NQC3 RTN4_HUMAN   | 0,88<br>1,14               | <b>1,35</b><br><b>1,25</b> | <b>1,92</b> | <b>2,44</b><br>1,64        | 1,18<br>0,92               | 1,58<br><b>1,46</b>        | <b>2,71</b><br>0,99        | 1,84<br>1,56               | <b>2,30</b><br>2,43        |
| Retinal dehydrogenase 2                                        | O94788 AL1A2_HUMAN  |                            |                            |             | <b>0,82</b>                | <b>1,30</b>                | <b>1,22</b>                |                            |                            |                            |

|                                                                                         |                     |             |             | 1,01        | 1,25        | 1,24        |             |             |             |             |
|-----------------------------------------------------------------------------------------|---------------------|-------------|-------------|-------------|-------------|-------------|-------------|-------------|-------------|-------------|
| Retinoblastoma binding protein 7                                                        | Q5JP00 Q5JP00_HUMAN |             |             |             |             |             | 0,64        | <b>0,47</b> | 0,47        |             |
| Retinoblastoma-binding protein 6                                                        | Q7Z6E9 RBBP6_HUMAN  |             |             |             |             |             | 0,93        | <b>0,36</b> | <b>0,26</b> |             |
| Retinoid-inducible serine carboxypeptidase precursor                                    | A7BI36 A7BI36_HUMAN | 0,96        | <b>1,42</b> | <b>1,28</b> | <b>1,76</b> | 0,94        | <b>1,19</b> | 1,06        | 1,86        | 2,04        |
| Retinoid-inducible serine carboxypeptidase precursor                                    | Q9HB40 RISC_HUMAN   |             |             |             | <b>1,52</b> | 1,07        | 1,10        |             |             |             |
| Retinol dehydrogenase 11                                                                | Q8TC12 RDH11_HUMAN  | 1,07        | <b>0,84</b> |             |             |             |             |             |             |             |
| Retinol dehydrogenase 13                                                                | Q8NBN7 RDH13_HUMAN  | <b>0,73</b> | 0,95        | 1,16        |             |             |             |             |             |             |
| Retinol dehydrogenase 14                                                                | Q9HBH5 RDH14_HUMAN  | 1,10        | <b>1,27</b> |             |             |             |             |             |             |             |
| RFTN1 protein (Fragment)                                                                | Q8N5I0 Q8N5I0_HUMAN | 0,69        | 0,80        | <b>0,55</b> |             |             |             |             |             |             |
| RGS19 protein                                                                           | Q6I9S5 Q6I9S5_HUMAN | 1,10        | 0,98        |             |             |             |             |             |             |             |
| Rho GDP-dissociation inhibitor 2                                                        | P52566 GDIR2_HUMAN  | 0,91        | 0,78        | 0,80        |             |             |             |             |             |             |
| Rho GTPase-activating protein 1                                                         | Q07960 RHG01_HUMAN  | 0,89        | 0,87        |             |             |             |             |             |             |             |
| Rho GTPase-activating protein 17                                                        | Q68EM7 RHG17_HUMAN  | 0,00        | 0,00        | 0,00        |             |             |             |             |             |             |
| Rho GTPase-activating protein 18                                                        | Q8N392 RHG18_HUMAN  | 1,08        | 1,28        |             |             |             |             |             |             |             |
| Rho guanine nucleotide exchange factor 1                                                | Q92888 ARHG1_HUMAN  | 0,00        | 0,00        | 0,00        |             |             |             |             |             |             |
| Rhomboid domain-containing protein 2                                                    | Q6NTF9 RHBD2_HUMAN  | 1,30        | 1,13        |             |             |             |             |             |             |             |
| Ribonuclease inhibitor                                                                  | P13489 RINI_HUMAN   | 1,38        | 3,61        | 6,78        | <b>0,92</b> | <b>0,83</b> | <b>0,85</b> | 0,81        | 2,31        | 3,30        |
| Ribonuclease T2                                                                         | A6XND5 A6XND5_HUMAN | 1,50        | 2,08        |             | 0,91        | 0,79        | 0,98        |             |             |             |
| Ribophorin I variant (Fragment)                                                         | Q53EP4 Q53EP4_HUMAN | 2,65        |             | 4,66        | 0,64        | <b>0,66</b> | <b>0,52</b> |             |             |             |
| Ribophorin II                                                                           | Q5JYR6 Q5JYR6_HUMAN |             |             |             | 0,79        | 0,85        | <b>0,51</b> |             |             |             |
| Ribosomal L1 domain-containing protein 1                                                | O76021 RL1D1_HUMAN  |             |             |             | <b>0,67</b> | 0,93        | 1,06        |             |             |             |
| Ribosomal protein L10 (Fragment)                                                        | Q5HY50 Q5HY50_HUMAN |             |             |             | 0,86        | <b>0,70</b> | <b>0,59</b> |             |             |             |
| Ribosomal protein L11                                                                   | Q5VVD0 Q5VVD0_HUMAN | 1,28        | 0,91        | 1,11        | 0,81        | <b>0,72</b> | 0,44        |             |             |             |
| Ribosomal protein L12 variant (Fragment)                                                | Q59FI9 Q59FI9_HUMAN | 0,99        | <b>0,82</b> |             | <b>0,77</b> | 0,75        | <b>0,52</b> |             |             |             |
| Ribosomal protein L14 variant (Fragment)                                                |                     |             |             |             |             |             |             |             |             |             |
| Ribosomal protein L15                                                                   | Q642I1 Q642I1_HUMAN | 1,28        | 0,91        | 1,11        |             |             |             |             |             |             |
| Ribosomal protein L15 (Fragment)                                                        | Q8N6E1 Q8N6E1_HUMAN |             |             |             | 0,93        | 0,90        | 0,83        |             |             |             |
| Ribosomal protein L18 (Fragment)                                                        | Q0QEW2 Q0QEW2_HUMAN |             |             |             |             |             |             |             |             |             |
| Ribosomal protein L18a variant (Fragment)                                               | Q53HD3 Q53HD3_HUMAN | <b>1,34</b> | 1,86        | 1,43        |             |             |             |             |             |             |
| Ribosomal protein L19 variant (Fragment)                                                | Q53G49 Q53G49_HUMAN | 1,01        | 0,90        |             |             |             |             |             |             |             |
| Ribosomal protein L27a                                                                  | Q6NZ52 Q6NZ52_HUMAN | 0,98        | 1,00        | 0,98        |             |             |             | <b>1,20</b> | <b>2,29</b> | <b>5,87</b> |
| Ribosomal protein L29                                                                   | Q6IP11 Q6IP11_HUMAN | <b>0,92</b> | <b>1,13</b> |             |             |             |             | <b>0,53</b> | <b>1,92</b> | <b>2,86</b> |
| Ribosomal protein L3                                                                    | Q96QL0 Q96QL0_HUMAN |             |             |             |             |             |             | 0,92        | <b>2,49</b> | <b>4,60</b> |
| Ribosomal protein L4 variant (Fragment)                                                 | Q59GY2 Q59GY2_HUMAN |             |             |             |             |             |             |             |             |             |
| Ribosomal protein L5 variant (Fragment)                                                 | Q59GX9 Q59GX9_HUMAN | 0,95        | 1,22        | <b>1,45</b> |             |             |             |             |             |             |
| Ribosomal protein L7a                                                                   | Q5T8U4 Q5T8U4_HUMAN | <b>1,28</b> | 1,33        |             | 1,35        | 0,83        | 1,22        |             |             |             |
| Ribosomal protein S18                                                                   | Q5SUJ3 Q5SUJ3_HUMAN |             |             |             | 0,64        | 0,75        | 0,65        | 1,21        | 1,52        | 1,94        |
| Ribosomal protein S19 (Fragment)                                                        | Q8WVX7 Q8WVX7_HUMAN |             |             |             |             |             |             | <b>0,33</b> | 0,86        | 1,02        |
| Ribosomal protein S2                                                                    | Q6IPX5 Q6IPX5_HUMAN |             |             |             | 1,28        | 0,92        | 0,66        |             |             |             |
| Ribosomal protein S27                                                                   | Q5T4L6 Q5T4L6_HUMAN |             |             |             | 1,18        | 1,02        | 1,12        | 1,48        | 1,38        | <b>2,02</b> |
| Ribosomal protein S27a                                                                  | Q5RKT7 Q5RKT7_HUMAN |             |             |             | 1,38        | 1,14        | 1,00        | <b>0,29</b> | 0,65        | 0,77        |
| Ribosomal protein S3A                                                                   | Q6NXR8 Q6NXR8_HUMAN | 0,97        | 1,12        | 1,74        | <b>1,41</b> | 1,01        | 1,13        |             |             |             |
| Ribosomal protein S4, X-linked X isoform variant (Fragment)                             | Q53HV1 Q53HV1_HUMAN | 1,10        | 0,93        | <b>0,75</b> | 1,10        | 0,93        | <b>0,75</b> | 0,79        | 0,73        | <b>0,52</b> |
| Ribosomal protein S6                                                                    | Q96DV6 Q96DV6_HUMAN | 0,72        | 1,22        | <b>2,48</b> | 0,95        | <b>0,75</b> | 0,86        | 0,95        | 1,03        | 0,81        |
| Ribosomal protein S6 kinase alpha-1                                                     | Q15418 KS6A1_HUMAN  | 1,17        | <b>1,65</b> | <b>4,04</b> | 0,99        | <b>0,84</b> | 1,00        | 0,99        | 1,24        | <b>1,61</b> |
| Ribosomal protein S6 kinase alpha-3                                                     | P51812 KS6A3_HUMAN  | 1,26        | 1,50        |             | <b>1,19</b> | 0,96        | 0,86        | <b>1,49</b> | <b>1,50</b> | <b>2,07</b> |
| Ribosomal protein S8                                                                    | Q5JR95 Q5JR95_HUMAN | 1,04        | 1,25        | <b>3,40</b> | <b>0,33</b> | <b>0,84</b> | 1,00        | <b>0,33</b> | <b>0,84</b> | 1,00        |
| Ribosome recycling factor, mitochondrial precursor                                      | Q96E11 RRFM_HUMAN   | 1,28        | 1,38        |             | <b>0,86</b> | <b>0,70</b> | <b>0,63</b> | 1,00        | <b>1,39</b> | <b>1,58</b> |
| RIG homolog (Fragment)                                                                  | Q9UDC2 Q9UDC2_HUMAN | 0,85        | 1,20        |             | <b>1,23</b> | 1,04        | 0,87        | <b>0,42</b> | 0,86        | 1,08        |
| RING and PHD-finger domain-containing protein KIAA1542                                  | Q9P1Y6 K1542_HUMAN  | 0,93        | 1,14        | 1,15        | 1,06        | 0,96        | <b>0,81</b> | 1,06        | <b>1,28</b> | <b>1,47</b> |
| RING finger and transmembrane domain-containing protein PTD016                          | Q96K19 RN170_HUMAN  | <b>1,58</b> | 1,06        |             | 1,11        | 1,01        | 0,90        | <b>0,43</b> | <b>0,70</b> | <b>0,67</b> |
| RING finger protein 170                                                                 | Q8ND24 RN214_HUMAN  | <b>0,78</b> | 1,01        | 1,61        | 1,01        | <b>0,73</b> | 0,87        | 0,90        | <b>1,57</b> | <b>1,30</b> |
| RING finger protein 214                                                                 | Q8ND24 RN214_HUMAN  | 1,14        | <b>1,39</b> |             | 1,24        | 1,02        | 0,91        | 0,92        | 0,97        | <b>1,15</b> |
| RNA (guanine-9-)-methyltransferase domain-containing protein 1, mitochondrial precursor | Q7L0Y3 RG9D1_HUMAN  | 1,17        | <b>1,65</b> | <b>4,04</b> | <b>1,23</b> | 0,90        | <b>1,12</b> | <b>0,88</b> | <b>0,92</b> | <b>0,54</b> |
| RNA binding protein, autoantigenic (Fragment)                                           | Q5QPL9 Q5QPL9_HUMAN | 1,26        | 1,50        |             | 1,16        | 0,88        | 1,03        | <b>1,28</b> | 1,02        | 1,00        |
| RNA methyltransferase-like protein 1                                                    | Q9HC36 RMTL1_HUMAN  | 1,04        | 1,25        | <b>3,40</b> | <b>1,24</b> | <b>0,90</b> | 1,00        | 0,95        | <b>1,15</b> | <b>0,80</b> |
| RNA polymerase-associated protein LEO1                                                  | Q8WVC0 LEO1_HUMAN   | 1,28        | 1,38        |             | 1,05        | 1,02        | 1,21        | <b>1,37</b> | <b>1,57</b> | <b>1,41</b> |
| RNA-binding motif protein X-linked-like 1                                               | Q96E39 Q96E39_HUMAN | 0,85        | 1,20        |             |             |             |             |             |             |             |
| RNA-binding protein 14                                                                  | Q96PK6 RBM14_HUMAN  | 1,54        | 1,80        | 4,49        | 1,25        | 1,00        | 0,77        | 0,81        | 0,41        | <b>0,44</b> |
| RNA-binding protein 26                                                                  | Q5T8P6 RBM26_HUMAN  | 1,46        | 1,58        |             |             |             |             | <b>0,51</b> | 0,48        | <b>0,44</b> |
|                                                                                         |                     |             |             |             |             |             |             | <b>0,84</b> | <b>0,18</b> | <b>0,11</b> |
|                                                                                         |                     | 0,94        | <b>1,78</b> | <b>3,88</b> | <b>1,27</b> | 0,93        | 1,09        | 1,06        | <b>1,22</b> | 0,93        |
|                                                                                         |                     |             |             |             | <b>1,12</b> | 1,02        | 1,13        | 0,96        | <b>1,23</b> | 1,04        |
|                                                                                         |                     | <b>0,82</b> | <b>1,38</b> |             |             |             |             |             |             |             |
|                                                                                         |                     | 1,28        | <b>2,33</b> | <b>7,70</b> | <b>1,36</b> | 0,93        | <b>0,85</b> |             |             |             |
|                                                                                         |                     | 1,03        | 1,37        |             | <b>1,44</b> | 0,98        | 0,97        | <b>0,58</b> | 0,84        | 0,96        |
|                                                                                         |                     | 1,16        | 2,40        | 5,46        | 0,66        | 0,51        | 0,25        |             |             |             |
|                                                                                         |                     |             |             |             | 0,96        | 0,99        | 0,74        |             |             |             |
|                                                                                         |                     | 0,87        | 1,35        | 2,06        | <b>1,26</b> | 0,95        | 1,22        | <b>0,44</b> | <b>0,50</b> | 0,90        |
|                                                                                         |                     |             |             |             | 1,62        | 1,16        | 1,83        |             |             |             |
|                                                                                         |                     | 0,91        | 0,85        | <b>0,64</b> |             |             |             | 0,92        | <b>0,70</b> | <b>0,65</b> |
|                                                                                         |                     | 1,00        | 0,97        |             | 0,00        | 0,00        | 0,00        | 1,15        | <b>1,24</b> | <b>1,36</b> |
|                                                                                         |                     |             |             |             | 1,12        | 0,91        | 1,13        | 0,94        | 0,90        | <b>0,64</b> |
|                                                                                         |                     |             |             |             |             |             |             | 1,10        | <b>0,73</b> | 0,81        |
|                                                                                         |                     |             |             |             |             |             |             | 0,87        | 0,69        | 0,63        |
|                                                                                         |                     | 1,70        | 1,54        |             |             |             |             |             |             |             |
|                                                                                         |                     | 0,00        | 0,00        | 0,00        |             |             |             |             |             |             |
|                                                                                         |                     |             |             |             | 0,00        | 0,00        | 0,00        |             |             |             |
|                                                                                         |                     | 0,88        | 0,86        | <b>0,69</b> |             |             |             |             |             |             |
|                                                                                         |                     | 0,94        | <b>0,89</b> |             |             |             |             |             |             |             |
|                                                                                         |                     | 1,16        | 0,68        | 0,65        |             |             |             | 0,00        | 0,00        | 0,00        |
|                                                                                         |                     | 1,04        | <b>0,90</b> |             |             |             |             | 1,11        | 0,54        | 0,28        |
|                                                                                         |                     |             |             |             |             |             |             | 0,69        | <b>0,59</b> | <b>0,27</b> |
|                                                                                         |                     |             |             |             |             |             |             | 0,85        | <b>0,55</b> | <b>0,36</b> |
|                                                                                         |                     |             |             |             |             |             |             | 0,97        | <b>0,38</b> | <b>0,24</b> |
|                                                                                         |                     |             |             |             |             |             |             | 0,95        | 0,92        | 0,67        |
|                                                                                         |                     |             |             |             |             |             |             | 0,96        | 0,40        | <b>0,23</b> |
|                                                                                         |                     |             |             |             | 0,00        | 0,00        | 0,00        | 1,41        | 0,85        | 0,53        |

|                                                                |                     |             |             |             |             |             |             |             |             |             |
|----------------------------------------------------------------|---------------------|-------------|-------------|-------------|-------------|-------------|-------------|-------------|-------------|-------------|
| RNA-binding protein 27                                         | Q9P2N5 RBM27_HUMAN  |             |             |             |             |             | 0,96        | 0,36        | 0,19        |             |
| RNA-binding protein 28                                         | Q9NW13 RBM28_HUMAN  |             |             |             |             |             | 0,50        | 0,28        | <b>0,32</b> |             |
| RNA-binding protein 42                                         | Q9BTD8 RBM42_HUMAN  |             |             |             |             |             | 1,21        | <b>0,43</b> | <b>0,26</b> |             |
|                                                                |                     |             |             |             |             |             | 1,22        | 0,80        | 0,61        |             |
| RNA-binding protein 4B                                         | Q9BQ04 RBM4B_HUMAN  |             |             |             |             |             | 0,73        | <b>0,17</b> | 0,14        |             |
| RNA-binding protein 8A                                         | Q9Y5S9 RBM8A_HUMAN  |             |             |             | 0,80        | 1,25        | 1,17        | 0,95        | <b>0,29</b> | <b>0,18</b> |
|                                                                |                     |             |             |             | 0,94        | <b>1,58</b> | 1,59        | <b>1,21</b> | <b>0,41</b> | <b>0,37</b> |
| RNA-binding protein Nova-2                                     | Q9UNW9 NOVA2_HUMAN  |             |             |             |             |             |             | <b>0,58</b> | <b>0,27</b> | <b>0,30</b> |
| RNA-binding protein Raly                                       | Q9UKM9 RALY_HUMAN   | 0,00        | 0,00        | 0,00        |             |             |             | 1,03        | <b>0,20</b> | 0,20        |
| RNA-binding protein with serine-rich domain 1                  | Q15287 RNPS1_HUMAN  |             |             |             |             |             |             | 1,08        | 0,82        | <b>0,28</b> |
|                                                                |                     |             |             |             |             |             |             | 1,83        | 1,44        | 1,27        |
| RNA-directed RNA polymerase catalytic subunit                  | Q9WLS3 RDRP_I97A1   | 0,00        | 0,00        | 0,00        |             |             |             |             |             |             |
| RNA-directed RNA polymerase catalytic subunit                  | Q0A461 RDRP_I68A3   | 1,34        | 1,99        | 3,64        |             |             |             |             |             |             |
| RNF13 protein                                                  | Q6IBJ9 Q6IBJ9_HUMAN | 0,00        | 0,00        |             |             |             |             |             |             |             |
| RNH1 protein (Fragment)                                        | Q96FD7 Q96FD7_HUMAN |             |             |             | <b>0,77</b> | <b>0,84</b> | <b>0,65</b> |             |             |             |
| RNP24 protein                                                  | Q6FHT8 Q6FHT8_HUMAN | <b>1,23</b> | 1,01        | 1,07        |             |             |             | 0,83        | <b>5,25</b> | <b>5,97</b> |
|                                                                |                     | <b>0,84</b> | 0,98        |             |             |             |             |             |             |             |
| Rootletin                                                      | Q5TZA2 CROCC_HUMAN  |             |             |             | 1,03        | 0,85        | 1,03        | 1,01        | 0,85        | 1,58        |
| RPL13A protein (Fragment)                                      | Q9BSQ6 Q9BSQ6_HUMAN | 0,86        | 1,28        | <b>1,98</b> | 1,09        | 0,87        | <b>0,75</b> | 0,95        | <b>1,47</b> | 0,92        |
|                                                                |                     |             |             |             |             |             |             | <b>0,77</b> | <b>0,76</b> | 0,81        |
| RPL14 protein                                                  | Q6IPH7 Q6IPH7_HUMAN | 1,03        | 1,30        | 1,42        | 0,00        | 0,00        | 0,00        | 1,02        | 1,02        | 1,09        |
|                                                                |                     |             |             |             | 0,00        | 0,00        | 0,00        |             |             |             |
| RPL7 protein                                                   | Q3KQU0 Q3KQU0_HUMAN |             |             |             | 1,02        | <b>0,80</b> | <b>0,78</b> | <b>0,81</b> | <b>1,53</b> | 0,92        |
|                                                                |                     | <b>1,18</b> | <b>1,22</b> |             |             |             |             | 0,95        | <b>0,73</b> | 0,97        |
| RPLP1 protein (Fragment)                                       | Q59FV6 Q59FV6_HUMAN |             |             |             |             |             |             | 0,88        | <b>2,09</b> | <b>1,91</b> |
| RPLP2 protein                                                  | Q6FG96 Q6FG96_HUMAN | 0,90        | 0,94        | 0,81        | 1,16        | <b>0,81</b> | 1,15        | <b>0,79</b> | <b>1,75</b> | <b>1,35</b> |
|                                                                |                     | <b>1,16</b> | <b>1,33</b> |             | 0,78        | 0,68        | 0,80        | <b>1,32</b> | <b>2,73</b> | <b>2,89</b> |
| RPN1 protein                                                   | Q6IBR0 Q6IBR0_HUMAN |             |             |             | 2,96        | 1,16        | 1,23        |             |             |             |
|                                                                |                     |             |             |             | <b>2,23</b> | 1,22        | <b>1,39</b> |             |             |             |
| RPS21 protein                                                  | Q8WVC2 Q8WVC2_HUMAN |             |             |             | <b>1,24</b> | 1,01        | <b>1,21</b> | <b>0,88</b> | 0,87        | <b>0,51</b> |
|                                                                |                     |             |             |             | 0,92        | <b>0,69</b> | 0,82        | <b>1,29</b> | 1,09        | <b>0,81</b> |
| RPS4X protein (Fragment)                                       | Q96IR1 Q96IR1_HUMAN | 0,97        | <b>1,56</b> | <b>3,06</b> |             |             |             | 0,90        | <b>0,69</b> | <b>0,56</b> |
|                                                                |                     |             |             |             | 1,53        | 1,01        | <b>1,35</b> | <b>0,84</b> | <b>0,51</b> | <b>0,60</b> |
| RRAS protein                                                   | Q6FH12 Q6FH12_HUMAN |             |             |             |             |             |             |             |             |             |
|                                                                |                     | 1,01        | 1,07        |             |             |             |             |             |             |             |
| RRBP1 protein                                                  | P54577 SYYC_HUMAN   |             |             |             |             |             |             | 0,68        | 2,38        | 2,20        |
| rRNA 2'-O-methyltransferase fibrillarin                        | P22087 FBRL_HUMAN   |             |             |             |             |             |             | <b>1,18</b> | <b>0,89</b> | <b>0,67</b> |
|                                                                |                     |             |             |             |             |             |             | <b>0,56</b> | 0,96        | 0,91        |
| RRP1 protein (Fragment)                                        | Q6PJJ2 Q6PJJ2_HUMAN |             |             |             |             |             |             | 0,88        | 0,38        | 0,16        |
|                                                                |                     |             |             |             |             |             |             | 1,00        | 0,46        | 0,38        |
| RRP12-like protein                                             | Q5JTH9 RRP12_HUMAN  |             |             |             |             |             |             | 1,17        | 1,03        | 1,06        |
|                                                                |                     |             |             |             |             |             |             | 0,73        | 0,96        | 0,73        |
| RRP1-like protein B                                            | Q14684 RRP1B_HUMAN  |             |             |             |             |             |             | <b>0,72</b> | <b>0,37</b> | <b>0,13</b> |
|                                                                |                     |             |             |             |             |             |             | 1,31        | <b>2,06</b> | 0,93        |
| RSU1 protein                                                   | Q6FI17 Q6FI17_HUMAN |             |             |             | <b>0,76</b> | 0,87        | 0,86        | 1,08        | 1,16        | <b>0,79</b> |
|                                                                |                     |             |             |             | 0,73        | 1,00        | 0,87        |             |             |             |
| RSU1 protein (Fragment)                                        | Q32Q10 Q32Q10_HUMAN |             |             |             |             |             |             | 0,00        | 0,00        | 0,00        |
| RuvB-like 2                                                    | Q9Y230 RUVB2_HUMAN  |             |             |             | 0,76        | 0,92        | 0,70        | 0,82        | <b>0,63</b> | <b>0,51</b> |
|                                                                |                     |             |             |             | 0,75        | <b>1,38</b> | 1,60        | 0,84        | 0,69        | 0,76        |
| S100 calcium binding protein A1                                | Q517Y6 Q517Y6_HUMAN |             |             |             |             |             |             |             |             |             |
| S-adenosylmethionine synthetase isoform type-2                 | P31153 METHK2_HUMAN |             |             |             | 0,92        | <b>1,13</b> | 0,96        |             |             |             |
|                                                                |                     |             |             |             | 0,97        | <b>1,53</b> | <b>1,39</b> |             |             |             |
| SAFB-like transcription modulator                              | Q9NWH9 SLTM_HUMAN   |             |             |             |             |             |             | <b>0,79</b> | <b>0,37</b> | <b>0,24</b> |
|                                                                |                     |             |             |             |             |             |             | <b>0,85</b> | <b>0,52</b> | <b>0,47</b> |
| SAM domain and HD domain-containing protein 1                  | Q9Y3Z3 SAMH1_HUMAN  | 1,10        | <b>2,13</b> | <b>3,62</b> | 0,92        | 0,97        | <b>0,58</b> | 0,86        | 1,26        | <b>1,75</b> |
|                                                                |                     | <b>1,20</b> | <b>1,35</b> |             | <b>0,79</b> | 0,94        | 0,50        | <b>0,47</b> | <b>1,29</b> | 0,94        |
| SAPK substrate protein 1                                       | Q04323 SAKS1_HUMAN  |             |             |             | 0,78        | 0,71        | 0,67        |             |             |             |
|                                                                |                     |             |             |             | 0,61        | 0,48        | 0,32        |             |             |             |
| SAPS domain family member 1                                    | Q9UPN7 SAPS1_HUMAN  |             |             |             | 1,06        | 1,03        | 1,09        |             |             |             |
| Sarcoplasmic/endoplasmic reticulum calcium ATPase 2            | P16615 AT2A2_HUMAN  | 0,94        | 1,11        | 1,09        |             |             |             |             |             |             |
|                                                                |                     | 0,95        | <b>1,12</b> |             | 1,78        | 1,01        | 1,23        |             |             |             |
| Sarcosine dehydrogenase, mitochondrial precursor               | Q9UL12 SARDH_HUMAN  | 0,90        | <b>0,88</b> | <b>0,73</b> |             |             |             |             |             |             |
| Scaffold attachment factor B                                   | A0AV56 A0AV56_HUMAN |             |             |             |             |             |             | <b>0,71</b> | <b>0,40</b> | <b>0,15</b> |
| Scaffold attachment factor B1                                  | Q15424 SAFB1_HUMAN  |             |             |             |             |             |             |             |             |             |
|                                                                |                     |             |             |             |             |             |             | <b>0,75</b> | <b>0,50</b> | <b>0,36</b> |
| Scaffold attachment factor B2                                  | Q14151 SAFB2_HUMAN  |             |             |             |             |             |             | 0,74        | 0,31        | 0,19        |
|                                                                |                     |             |             |             |             |             |             | <b>0,70</b> | <b>0,43</b> | <b>0,35</b> |
| SCAMP1 protein (Fragment)                                      | Q6FG23 Q6FG23_HUMAN | 1,27        | 1,21        | 1,24        |             |             |             |             |             |             |
| SCAMP2 protein                                                 | Q6IBK3 Q6IBK3_HUMAN | 1,06        | 1,04        | 1,04        |             |             |             |             |             |             |
|                                                                |                     | 1,07        | 0,98        |             | 0,00        | 0,00        | 0,00        |             |             |             |
| Scavenger receptor class B, member 2                           | Q53Y63 Q53Y63_HUMAN | 0,95        | 1,04        | <b>0,89</b> |             |             |             |             |             |             |
|                                                                |                     | 0,98        | 1,03        |             | <b>2,08</b> | 0,87        | 1,13        |             |             |             |
| Scavenger receptor cysteine-rich type 1 protein M130 precursor | Q86VB7 C163A_HUMAN  | 1,17        | 0,90        | 0,79        |             |             |             |             |             |             |
|                                                                |                     | 1,02        | <b>0,81</b> |             |             |             |             |             |             |             |
| SCO1 protein homolog, mitochondrial precursor                  | O75880 SCO1_HUMAN   | 0,88        | 0,86        | <b>0,75</b> |             |             |             |             |             |             |
|                                                                |                     | 1,00        | 0,97        |             |             |             |             |             |             |             |
| SCO2 protein homolog, mitochondrial precursor                  | O43819 SCO2_HUMAN   | 1,16        | 0,80        | 0,84        |             |             |             |             |             |             |
|                                                                |                     | 0,86        | 0,90        |             |             |             |             |             |             |             |
| Sec23 homolog B                                                | Q503A9 Q503A9_HUMAN |             |             |             | 0,00        | 0,00        | 0,00        |             |             |             |
|                                                                |                     |             |             |             | 0,00        | 0,00        | 0,00        |             |             |             |
| Secretory carrier-associated membrane protein 4                | Q969E2 SCAM4_HUMAN  | 1,24        | 0,81        | 0,99        |             |             |             |             |             |             |
|                                                                |                     | 1,04        | 0,91        |             |             |             |             |             |             |             |
| Secretory phospholipase A2 receptor precursor                  | Q13018 PLA2R_HUMAN  | 0,00        | 0,00        | 0,00        |             |             |             |             |             |             |
| Selenoprotein H                                                | Q8IZQ5 SELH_HUMAN   |             |             |             |             |             |             | 0,00        | 0,00        | 0,00        |
| Selenoprotein N precursor                                      | Q9NZV5 SELN_HUMAN   | 1,21        | 0,81        | 0,75        |             |             |             |             |             |             |
|                                                                |                     | 0,00        | 0,00        |             |             |             |             |             |             |             |
| Sepiapterin reductase                                          | P35270 SPRE_HUMAN   | 1,04        | 0,93        | 0,81        |             |             |             |             |             |             |
|                                                                |                     | 1,00        | 0,96        |             |             |             |             |             |             |             |
| Septin                                                         | Q3LIE9 Q3LIE9_HUMAN |             |             |             |             |             |             |             |             |             |
|                                                                |                     |             |             |             |             |             |             | <b>0,48</b> | <b>0,45</b> | <b>0,30</b> |
| Septin (Fragment)                                              | A4GYY8 A4GYY8_HUMAN |             |             |             |             |             |             |             |             |             |
|                                                                |                     |             |             |             | 0,92        | 1,23        | <b>1,46</b> |             |             |             |
| Septin 7                                                       | Q8TC62 Q8TC62_HUMAN |             |             |             |             |             |             | 0,98        | <b>0,51</b> | <b>0,32</b> |
| Septin-11                                                      | Q9NVA2 SEP11_HUMAN  |             |             |             |             |             |             |             |             |             |
|                                                                |                     |             |             |             |             |             |             | 0,47        | 0,43        | 0,31        |
| Septin-2                                                       | Q15019 SEPT2_HUMAN  |             |             |             | 1,10        | <b>1,52</b> | <b>1,77</b> | 0,97        | <b>0,52</b> | <b>0,42</b> |
|                                                                |                     |             |             |             |             |             |             | 1,20        | 0,61        | <b>0,52</b> |
| Septin-7                                                       | Q16181 SEPT7_HUMAN  |             |             |             | <b>0,77</b> | <b>1,31</b> | <b>1,65</b> |             |             |             |

|                                                                                                |                     |                            |                            |             |                     |                            |                            |                            |                            |                            |
|------------------------------------------------------------------------------------------------|---------------------|----------------------------|----------------------------|-------------|---------------------|----------------------------|----------------------------|----------------------------|----------------------------|----------------------------|
| Septin-9                                                                                       | Q9UHD8 SEPT9_HUMAN  |                            |                            |             | 0,80<br>0,53        | 1,11<br>0,90               | 0,87<br>0,85               | <b>0,86</b><br>0,96        | <b>0,41</b><br><b>0,72</b> | <b>0,26</b><br><b>0,51</b> |
| Serine beta-lactamase-like protein LACTB, mitochondrial precursor                              | P83111 LACTB_HUMAN  | <b>0,87</b><br><b>0,93</b> | 0,95<br><b>0,86</b>        | <b>0,82</b> |                     |                            |                            | 0,94<br><b>0,45</b>        | 1,08<br>0,93               | <b>1,54</b><br><b>1,24</b> |
| Serine hydroxymethyltransferase                                                                | Q8N1A5 Q8N1A5_HUMAN | 0,96                       | 0,91                       | <b>0,73</b> | <b>1,72</b><br>2,15 | <b>1,47</b><br><b>1,42</b> | <b>2,60</b><br><b>2,04</b> |                            |                            |                            |
| Serine hydroxymethyltransferase (Fragment)                                                     | Q5BJF5 Q5BJF5_HUMAN |                            |                            |             |                     |                            |                            | 1,23<br>0,71               | <b>1,69</b><br><b>1,90</b> | <b>3,18</b><br><b>2,62</b> |
| Serine hydroxymethyltransferase (Fragment)                                                     | Q53ET4 Q53ET4_HUMAN | 0,95                       | 0,96                       |             |                     |                            |                            |                            |                            |                            |
| Serine incorporator 1                                                                          | Q9NRX5 SERC1_HUMAN  | 0,00<br>0,00               | 0,00<br>0,00               | 0,00        |                     |                            |                            |                            |                            |                            |
| Serine palmitoyltransferase 1                                                                  | O15269 SPTC1_HUMAN  | 1,09<br>0,92               | 0,99<br>1,11               | 0,94        |                     |                            |                            |                            |                            |                            |
| Serine protease HTRA2, mitochondrial precursor                                                 | O43464 HTRA2_HUMAN  | 0,90                       | 0,99                       |             |                     |                            |                            |                            |                            |                            |
| Serine/arginine repetitive matrix protein 2                                                    | Q9UQ35 SRRM2_HUMAN  |                            |                            |             | 1,18                | 1,67                       | 2,03                       | <b>0,79</b><br><b>1,24</b> | <b>0,59</b><br><b>1,59</b> | <b>0,37</b><br><b>1,13</b> |
| Serine/threonine kinase 10                                                                     | Q6NSK0 Q6NSK0_HUMAN | 1,49                       | 1,81                       | 2,63        |                     |                            |                            | <b>1,25</b><br>0,97        | <b>2,24</b><br><b>2,24</b> | <b>1,48</b><br><b>3,02</b> |
| Serine/threonine kinase 4 variant (Fragment)                                                   | Q59FZ4 Q59FZ4_HUMAN |                            |                            |             | 1,04                | 0,87                       | 0,79                       |                            |                            |                            |
| Serine/threonine protein phosphatase (protein phosphatase 2, catalytic subunit, alpha isozyme) | Q6I9T8 Q6I9T8_HUMAN |                            |                            |             | 0,69                | <b>0,90</b>                | 0,75                       |                            |                            |                            |
| Serine/threonine protein phosphatase                                                           | Q07161 Q07161_HUMAN |                            |                            |             | 0,89                | 0,91                       | 0,71                       |                            |                            |                            |
| Serine/threonine protein phosphatase                                                           | Q8WZ56 Q8WZ56_HUMAN |                            |                            |             | 0,97                | 1,09                       | 1,06                       |                            |                            |                            |
| Serine/threonine protein phosphatase                                                           | A8K3B7 A8K3B7_HUMAN |                            |                            |             | 0,93                | 0,94                       | 0,91                       |                            |                            |                            |
| Serine/threonine protein phosphatase                                                           | A8W6Z7 A8W6Z7_HUMAN |                            |                            |             | 0,73                | 0,60                       | 0,59                       |                            |                            |                            |
| Serine/threonine-protein phosphatase PP1-alpha catalytic subunit                               | P62136 PP1A_HUMAN   | 1,81                       | <b>1,35</b>                |             |                     |                            |                            |                            |                            |                            |
| Serine/threonine protein phosphatase (Fragment)                                                | Q9BPW0 Q9BPW0_HUMAN |                            |                            |             | 1,03<br><b>0,82</b> | 0,98<br><b>0,86</b>        | 0,95<br>1,02               |                            |                            |                            |
| Serine/threonine-protein kinase 10                                                             | O94804 STK10_HUMAN  |                            |                            |             | 0,75<br><b>0,79</b> | <b>0,65</b><br>0,85        | <b>0,59</b><br>0,76        |                            |                            |                            |
| Serine/threonine-protein kinase 3                                                              | Q13188 STK3_HUMAN   |                            |                            |             | 0,00                | 0,00                       | 0,00                       |                            |                            |                            |
| Serine/threonine-protein kinase MST4                                                           | Q9P289 MST4_HUMAN   |                            |                            |             | 0,68                | 1,36                       | 0,75                       |                            |                            |                            |
| Serine/threonine-protein kinase N1                                                             | Q16512 PKN1_HUMAN   |                            |                            |             | 0,78                | 1,05                       | 0,96                       |                            |                            |                            |
| Serine/threonine-protein kinase OSR1                                                           | O95747 OXSR1_HUMAN  |                            |                            |             | 0,75                | 0,80                       | 0,76                       |                            |                            |                            |
| Serine/threonine-protein kinase PAK 2                                                          | Q13177 PAK2_HUMAN   |                            |                            |             | 0,73<br><b>0,70</b> | 0,88<br><b>0,82</b>        | <b>0,69</b><br><b>0,58</b> |                            |                            |                            |
| Serine/threonine-protein kinase VRK1                                                           | Q99986 VRK1_HUMAN   |                            |                            |             |                     |                            |                            | 0,91<br>0,86               | <b>0,30</b><br>0,70        | <b>0,21</b><br>0,70        |
| Serine/threonine-protein phosphatase 1 regulatory subunit 10                                   | Q96QC0 PP1RA_HUMAN  |                            |                            |             |                     |                            |                            | 0,92<br>1,03               | <b>0,38</b><br>0,93        | <b>0,16</b><br><b>0,55</b> |
| Serine/threonine-protein phosphatase 2A 65 kDa regulatory subunit A alpha isoform              | P30153 2AAA_HUMAN   |                            |                            |             | <b>0,84</b><br>0,75 | 0,90<br><b>0,88</b>        | 1,00<br><b>0,79</b>        |                            |                            |                            |
| Serine/threonine-protein phosphatase PP1-alpha catalytic subunit                               | P62136 PP1A_HUMAN   |                            |                            |             | <b>1,26</b>         | <b>1,30</b>                | <b>1,33</b>                | 1,28                       | <b>0,54</b>                | <b>0,54</b>                |
| Serine-threonine kinase receptor-associated protein                                            | Q9Y3F4 STRAP_HUMAN  |                            |                            |             | 0,70                | 0,88                       | 0,71                       |                            |                            |                            |
| Serpin H1 precursor                                                                            | P50454 SERPH_HUMAN  | 0,98<br>1,13               | 1,01<br>1,08               | 1,00        |                     |                            |                            | 0,00                       | 0,00                       | 0,00                       |
| Serum albumin                                                                                  | Q56G89 Q56G89_HUMAN |                            |                            |             | 3,00                | 1,78                       | 8,68                       |                            |                            |                            |
| Serum albumin precursor                                                                        | P02768 ALBU_HUMAN   | <b>1,15</b><br><b>1,36</b> | <b>0,87</b><br><b>1,44</b> | <b>1,64</b> | <b>2,72</b>         | <b>1,44</b>                | <b>6,76</b>                |                            |                            |                            |
| Serum response factor-binding protein 1                                                        | Q8NEF9 SRFB1_HUMAN  |                            |                            |             |                     |                            |                            | 0,89                       | <b>0,33</b>                | <b>0,22</b>                |
| Seryl-tRNA synthetase, mitochondrial precursor                                                 | Q9NP81 SYSM_HUMAN   | 0,98<br>0,92               | 1,02<br>0,94               | 0,84        |                     |                            |                            |                            |                            |                            |
| Ses2 protein (Fragment)                                                                        | Q9BU04 Q9BU04_HUMAN | 1,20                       | 0,86                       |             |                     |                            |                            |                            |                            |                            |
| SET domain-containing protein 3                                                                | Q86TU7 SETD3_HUMAN  |                            |                            |             | 0,00<br>1,16        | 0,00<br>1,05               | 0,00<br>1,09               |                            |                            |                            |
| SET translocation                                                                              | Q5VXV3 Q5VXV3_HUMAN |                            |                            |             | 0,81<br>0,74        | 1,06<br>1,56               | 0,78<br>0,59               | <b>1,99</b><br><b>1,84</b> | <b>4,44</b><br><b>7,30</b> | <b>2,65</b><br><b>5,21</b> |
| SF3B2 protein (Fragment)                                                                       | Q9BWD2 Q9BWD2_HUMAN |                            |                            |             | 1,79<br>0,00        | 3,35<br>0,00               | <b>2,59</b><br>0,00        | <b>0,91</b><br>1,00        | <b>0,31</b><br><b>0,51</b> | <b>0,21</b><br><b>0,43</b> |
| S-formylglutathione hydrolase                                                                  | P10768 ESTD_HUMAN   |                            |                            |             | 0,89                | 1,07                       | 1,00                       |                            |                            |                            |
| SFT2 domain containing 2                                                                       | Q5TIH2 Q5TIH2_HUMAN |                            |                            |             | 0,00                | 0,00                       | 0,00                       |                            |                            |                            |
| SGTA protein                                                                                   | Q6FIA9 Q6FIA9_HUMAN |                            |                            |             | 0,51                | 0,85                       | 0,55                       |                            |                            |                            |
| SH3 domain-binding glutamic acid-rich-like protein                                             | O75368 SH3L1_HUMAN  |                            |                            |             | <b>0,82</b><br>0,64 | 0,98<br>0,77               | <b>0,82</b><br><b>0,72</b> | 1,21                       | 2,52                       | 2,90                       |
| SH3 domain-binding protein 1                                                                   | Q9Y3L3 3BP1_HUMAN   |                            |                            |             | <b>0,64</b>         | 0,71                       | 0,73                       |                            |                            |                            |
| SH3 protein expressed in lymphocytes homolog                                                   | O75995 SLY_HUMAN    |                            |                            |             | <b>0,75</b>         | 0,77                       | 0,68                       |                            |                            |                            |
| Shootin-1                                                                                      | A0MZ66 SHOT1_HUMAN  |                            |                            |             | <b>0,71</b>         | <b>0,75</b>                | <b>0,55</b>                |                            |                            |                            |
| Short-chain specific acyl-CoA dehydrogenase, mitochondrial precursor                           | P16219 ACADS_HUMAN  | <b>0,79</b><br>0,98        | <b>0,75</b><br>0,94        | 0,80        |                     |                            |                            |                            |                            |                            |
| Sialate O-acetyltransferase precursor                                                          | Q9HAT2 SIAE_HUMAN   | 1,08                       | 0,99                       |             |                     |                            |                            |                            |                            |                            |
| Sialic acid synthase                                                                           | Q9NR45 SIAS_HUMAN   |                            |                            |             | 0,85                | <b>0,81</b>                | 0,82                       |                            |                            |                            |
| Sialic acid-binding Ig-like lectin 7 precursor                                                 | Q9Y286 SIGL7_HUMAN  | 0,00<br>0,00               | 0,00<br>0,00               | 0,00        |                     |                            |                            |                            |                            |                            |
| Sialic acid-binding Ig-like lectin 9 precursor                                                 | Q9Y336 SIGL9_HUMAN  | 0,00<br>0,98               | 0,00<br>0,81               | 0,00        |                     |                            |                            |                            |                            |                            |
| Sialin                                                                                         | Q9NRA2 S17A5_HUMAN  | 1,05                       | 0,99                       |             |                     |                            |                            |                            |                            |                            |
| Sialidase-1 precursor                                                                          | Q99519 NEUR1_HUMAN  | 0,00<br>1,00               | 0,00<br>0,88               | 0,00        |                     |                            |                            |                            |                            |                            |
| Sideroflexin-1                                                                                 | Q9H9B4 SFXN1_HUMAN  | 0,85<br>0,92               | 0,81<br><b>0,89</b>        | 0,80        |                     |                            |                            |                            |                            |                            |
| Sideroflexin-2                                                                                 | Q96NB2 SFXN2_HUMAN  | 0,98                       | 0,96                       |             |                     |                            |                            |                            |                            |                            |
| Sideroflexin-3                                                                                 | Q9BWM7 SFXN3_HUMAN  | 0,95<br>1,02               | <b>0,87</b><br><b>0,85</b> | <b>0,76</b> |                     |                            |                            |                            |                            |                            |
| Sideroflexin-4                                                                                 | Q6P4A7 SFXN4_HUMAN  | 1,01                       | 1,08                       |             |                     |                            |                            |                            |                            |                            |
| Sideroflexin-5                                                                                 | Q8TD22 SFXN5_HUMAN  | 1,07<br>0,98               | 0,96<br>0,94               | 0,84        |                     |                            |                            |                            |                            |                            |
| SIDT2 protein                                                                                  | Q24JR2 Q24JR2_HUMAN | 0,97                       | 0,94                       |             |                     |                            |                            |                            |                            |                            |
| Sigma 1-type opioid receptor                                                                   | Q99720 OPRS1_HUMAN  | <b>0,45</b>                | 1,10                       | 1,15        |                     |                            |                            |                            |                            |                            |

|                                                                      |                     |             |             |             |  |  |  |             |             |             |             |
|----------------------------------------------------------------------|---------------------|-------------|-------------|-------------|--|--|--|-------------|-------------|-------------|-------------|
| Signal peptidase complex SPC-18                                      | Q7Z4Z6 Q7Z4Z6_HUMAN |             |             |             |  |  |  |             | <b>1,99</b> | <b>3,64</b> | <b>3,78</b> |
|                                                                      |                     |             |             |             |  |  |  |             | 1,44        | 1,74        | 3,17        |
| Signal peptidase complex subunit 1                                   | Q9Y6A9 SPCS1_HUMAN  | 0,00        | 0,00        | 0,00        |  |  |  |             |             |             |             |
|                                                                      |                     | 1,17        | 1,03        |             |  |  |  |             |             |             |             |
| Signal peptidase complex subunit 2                                   | Q15005 SPCS2_HUMAN  | 1,00        | <b>1,18</b> | 1,12        |  |  |  |             | 1,10        | <b>3,76</b> | <b>5,54</b> |
|                                                                      |                     | 0,98        | <b>1,15</b> |             |  |  |  |             | 1,04        | <b>2,75</b> | <b>4,37</b> |
| Signal peptidase complex subunit 3                                   | P61009 SPCS3_HUMAN  | 0,94        | 0,80        | <b>0,78</b> |  |  |  |             | 0,94        | <b>2,35</b> | <b>2,50</b> |
|                                                                      |                     | 0,79        | 1,17        |             |  |  |  |             |             |             |             |
| Signal peptide peptidase beta                                        | Q15K36 Q15K36_HUMAN |             |             |             |  |  |  | <b>1,81</b> | 0,97        | 0,98        |             |
| Signal recognition particle 14 kDa protein                           | P37108 SRP14_HUMAN  | 0,91        | 1,10        | 1,32        |  |  |  |             |             |             |             |
| Signal recognition particle 14kD                                     | Q96Q14 Q96Q14_HUMAN |             |             |             |  |  |  | 1,16        | 1,14        | 1,14        |             |
|                                                                      |                     |             |             |             |  |  |  | 0,92        | 1,06        | 1,01        |             |
| Signal recognition particle 19 kDa protein                           | P09132 SRP19_HUMAN  |             |             |             |  |  |  |             |             |             |             |
|                                                                      |                     |             |             |             |  |  |  |             | 0,00        | 0,00        | 0,00        |
| Signal recognition particle 9 kDa protein                            | P49458 SRP09_HUMAN  |             |             |             |  |  |  | 0,00        | 0,00        | 0,00        |             |
|                                                                      |                     | 1,24        | 1,49        |             |  |  |  | 0,66        | 0,87        | 0,81        |             |
| Signal recognition particle receptor subunit beta                    | Q9Y5M8 SRPRB_HUMAN  | 1,11        | 1,29        | 1,40        |  |  |  |             |             |             |             |
|                                                                      |                     | 0,96        | 1,06        |             |  |  |  |             |             |             |             |
| Signal-regulatory protein alpha                                      | A2A2E1 A2A2E1_HUMAN | 1,20        | 0,74        | 0,66        |  |  |  | 0,00        | 0,00        | 0,00        |             |
|                                                                      |                     | 1,21        | 0,98        |             |  |  |  |             |             |             |             |
| Signal transducer and activator of transcription 1-alpha/beta        | P42224 STAT1_HUMAN  |             |             |             |  |  |  | 1,33        | <b>0,78</b> | 0,84        |             |
| Similar to 60S ribosomal protein L35                                 | A4D2M5 A4D2M5_HUMAN |             |             |             |  |  |  | 0,93        | 1,05        | 0,84        |             |
|                                                                      |                     |             |             |             |  |  |  | 1,12        | 1,13        | 1,21        |             |
| Similar to AFG3 ATPase family gene 3-like 2 (Fragment)               | Q8TA92 Q8TA92_HUMAN | <b>0,83</b> | 0,95        | 0,90        |  |  |  | 1,10        | 0,95        | 0,83        |             |
|                                                                      |                     | 1,02        | 0,95        |             |  |  |  |             |             |             |             |
| Similar to Chain , Heat-Shock Cognate 70kd Protein                   | A4D111 A4D111_HUMAN |             |             |             |  |  |  |             |             |             |             |
|                                                                      |                     |             |             |             |  |  |  | 0,00        | 0,00        | 0,00        |             |
| Similar to ribosomal protein L23 (Fragment)                          | Q9BTQ7 Q9BTQ7_HUMAN | 1,01        | <b>2,62</b> | <b>4,97</b> |  |  |  |             |             |             |             |
|                                                                      |                     |             |             |             |  |  |  | 1,30        | 1,30        | 0,96        |             |
| Similar to ribosomal protein L23 (Fragment)                          | Q9BTQ7 Q9BTQ7_HUMAN |             |             |             |  |  |  | 1,32        | 0,77        | 0,58        |             |
| Similar to ribosomal protein S8 (Fragment)                           | Q9BS10 Q9BS10_HUMAN |             |             |             |  |  |  |             |             |             |             |
|                                                                      |                     | 0,97        | 1,38        |             |  |  |  |             | 0,94        | 1,10        | 1,36        |
| Similar to RIKEN cDNA C030006K11 gene                                | Q6P2Q7 Q6P2Q7_HUMAN |             |             |             |  |  |  |             |             |             |             |
|                                                                      |                     | 1,02        | 0,95        |             |  |  |  |             |             |             |             |
| Similar to Splicing factor, arginine/serine-rich, 46kD               | A4D2F6 A4D2F6_HUMAN | 0,84        | 1,07        | 1,34        |  |  |  |             |             |             |             |
| Single-stranded DNA binding protein 1                                | Q567R6 Q567R6_HUMAN | <b>0,74</b> | <b>0,72</b> | <b>0,63</b> |  |  |  |             |             |             |             |
|                                                                      |                     |             |             |             |  |  |  | <b>2,24</b> | 1,37        | <b>1,66</b> |             |
|                                                                      | Q04837 SSB_HUMAN    |             |             |             |  |  |  |             | <b>1,94</b> | <b>2,32</b> | <b>3,17</b> |
| Single-stranded DNA-binding protein, mitochondrial precursor         |                     | <b>0,93</b> | <b>0,83</b> |             |  |  |  |             | <b>1,61</b> | <b>2,52</b> | <b>2,51</b> |
| Sirtuin (Silent mating type information regulation 2 homolog) 5      | Q5T295 Q5T295_HUMAN | 0,00        | 0,00        | 0,00        |  |  |  |             |             |             |             |
| Sister chromatid cohesion protein PDS5 homolog A                     | Q29RF7 PDS5A_HUMAN  |             |             |             |  |  |  |             | <b>0,77</b> | <b>0,55</b> | <b>0,37</b> |
|                                                                      |                     |             |             |             |  |  |  |             | <b>1,31</b> | 1,23        | 0,76        |
| Sister chromatid cohesion protein PDS5 homolog B                     | Q9NTI5 PDS5B_HUMAN  |             |             |             |  |  |  |             | 0,84        | 0,58        | 0,60        |
|                                                                      |                     |             |             |             |  |  |  |             | 0,90        | 0,99        | 1,01        |
| Sjogren syndrome antigen B                                           | Q53XJ4 Q53XJ4_HUMAN |             |             |             |  |  |  | 1,02        | <b>1,58</b> | <b>1,30</b> |             |
|                                                                      |                     |             |             |             |  |  |  | 0,89        | <b>1,26</b> | 1,13        |             |
| SLAM family member 5 precursor                                       | Q9UIB8 SLAF5_HUMAN  | 1,15        | 0,58        | 0,59        |  |  |  |             |             |             |             |
|                                                                      |                     | <b>1,21</b> | 0,97        |             |  |  |  |             |             |             |             |
| SLC25A11 protein                                                     | Q6IBH0 Q6IBH0_HUMAN | 1,01        | 0,98        | 0,90        |  |  |  |             |             |             |             |
|                                                                      |                     | 0,92        | <b>0,91</b> |             |  |  |  |             | 0,00        | 0,00        | 0,00        |
| SLC25A5 protein (Fragment)                                           | Q6NVC0 Q6NVC0_HUMAN |             |             |             |  |  |  | <b>2,28</b> | <b>1,17</b> | 1,15        |             |
|                                                                      |                     |             |             |             |  |  |  | 2,37        | <b>1,24</b> | <b>1,23</b> |             |
| SLC4A2 protein                                                       | Q8TAG3 Q8TAG3_HUMAN |             |             |             |  |  |  |             | <b>0,83</b> | <b>1,50</b> | <b>3,04</b> |
|                                                                      |                     | <b>1,23</b> | 1,07        |             |  |  |  |             |             |             |             |
| Small EDRK-rich factor 2                                             | P84101 SERF2_HUMAN  |             |             |             |  |  |  | 0,64        | 0,42        | 0,34        |             |
|                                                                      |                     |             |             |             |  |  |  | 0,53        | 0,50        | 0,48        |             |
| Small nuclear ribonucleoprotein component                            | Q8IXJ3 Q8IXJ3_HUMAN |             |             |             |  |  |  |             |             |             |             |
|                                                                      |                     |             |             |             |  |  |  | 0,00        | 0,00        | 0,00        |             |
| Small nuclear ribonucleoprotein E                                    | P62304 RUXE_HUMAN   |             |             |             |  |  |  |             | 0,00        | 0,00        | 0,00        |
|                                                                      |                     |             |             |             |  |  |  |             | 2,02        |             | 0,32        |
| Small nuclear ribonucleoprotein F                                    | P62306 RUXF_HUMAN   |             |             |             |  |  |  |             | 0,65        | 0,08        | 0,04        |
| Small nuclear ribonucleoprotein polypeptide A' variant (Fragment)    | Q53G61 Q53G61_HUMAN |             |             |             |  |  |  |             | 0,91        | <b>0,40</b> | <b>0,24</b> |
|                                                                      |                     |             |             |             |  |  |  |             | 1,01        | <b>0,50</b> | <b>0,39</b> |
| Small nuclear ribonucleoprotein polypeptide C                        | Q5TAL4 Q5TAL4_HUMAN |             |             |             |  |  |  |             | 0,94        | <b>0,36</b> | <b>0,13</b> |
|                                                                      |                     |             |             |             |  |  |  |             | 1,82        | 0,52        | 0,61        |
| Small nuclear ribonucleoprotein Sm D2                                | P62316 SMD2_HUMAN   |             |             |             |  |  |  | 1,01        | 2,09        | 2,10        |             |
|                                                                      |                     |             |             |             |  |  |  | 1,39        | 3,73        | 2,71        |             |
| Small nuclear ribonucleoprotein Sm D3                                | P62318 SMD3_HUMAN   |             |             |             |  |  |  |             | 1,24        | <b>0,51</b> | <b>0,46</b> |
|                                                                      |                     |             |             |             |  |  |  |             | <b>0,77</b> | <b>0,54</b> | 0,41        |
| Small ubiquitin-related modifier 1 precursor                         | P63165 SUMO1_HUMAN  |             |             |             |  |  |  |             | 0,86        | <b>0,36</b> | 0,20        |
|                                                                      |                     |             |             |             |  |  |  |             | <b>1,29</b> | <b>0,65</b> | <b>0,30</b> |
| Small ubiquitin-related modifier 2 precursor                         | P61956 SUMO2_HUMAN  |             |             |             |  |  |  | 1,00        | 0,96        | 0,84        |             |
|                                                                      |                     |             |             |             |  |  |  | <b>0,66</b> | <b>0,78</b> | <b>0,67</b> |             |
| Small ubiquitin-related modifier 3 precursor                         | P55854 SUMO3_HUMAN  |             |             |             |  |  |  | 0,59        | 0,76        | 0,56        |             |
| SMARCA4 isoform 2                                                    | Q9HBD4 Q9HBD4_HUMAN |             |             |             |  |  |  |             |             |             |             |
|                                                                      |                     |             |             |             |  |  |  |             | 0,00        | 0,00        | 0,00        |
| Sn1-specific diacylglycerol lipase beta                              | Q8NCG7 DGLB_HUMAN   | 0,84        | 0,85        | 0,79        |  |  |  |             |             |             |             |
|                                                                      |                     | 0,91        | 1,03        |             |  |  |  |             |             |             |             |
| Snare-associated protein Snapin                                      | Q95295 S25BP_HUMAN  |             |             |             |  |  |  |             |             |             |             |
|                                                                      |                     | 1,16        | 0,99        |             |  |  |  |             |             |             |             |
| SNRPB protein                                                        | Q6IB35 Q6IB35_HUMAN |             |             |             |  |  |  |             | <b>0,80</b> | <b>0,39</b> | <b>0,18</b> |
| SNRPB protein                                                        | Q6PKB4 Q6PKB4_HUMAN |             |             |             |  |  |  |             |             |             |             |
|                                                                      |                     |             |             |             |  |  |  |             | <b>2,22</b> | <b>0,64</b> | 0,54        |
| SNRPG protein                                                        | Q6IB86 Q6IB86_HUMAN |             |             |             |  |  |  |             | <b>0,70</b> | <b>0,34</b> | <b>0,19</b> |
| SNW1 protein                                                         | Q6I9S2 Q6I9S2_HUMAN |             |             |             |  |  |  |             | <b>0,59</b> | <b>0,24</b> | <b>0,13</b> |
|                                                                      |                     |             |             |             |  |  |  |             | 0,91        | <b>0,47</b> | <b>0,34</b> |
| SNX5 protein (Fragment)                                              | Q6P5V6 Q6P5V6_HUMAN |             |             |             |  |  |  |             |             |             |             |
|                                                                      |                     |             |             |             |  |  |  | 0,51        | 0,66        | 0,58        |             |
| Sodium/hydrogen exchanger 7                                          | Q96T83 SL9A7_HUMAN  |             |             |             |  |  |  |             |             |             |             |
|                                                                      |                     | 1,01        | 1,04        |             |  |  |  |             |             |             |             |
| Sodium/potassium-transporting ATPase subunit alpha-1 precursor       | P05023 AT1A1_HUMAN  | <b>1,42</b> | <b>1,10</b> | <b>1,30</b> |  |  |  | <b>1,95</b> | <b>1,60</b> | 1,36        |             |
|                                                                      |                     | 1,02        | <b>1,08</b> |             |  |  |  | <b>2,22</b> | <b>1,40</b> | <b>2,06</b> |             |
| Sodium/potassium-transporting ATPase subunit beta-3                  | Q32Q14 Q32Q14_HUMAN | <b>1,44</b> | 1,12        | <b>1,27</b> |  |  |  | <b>1,48</b> | 0,99        | 1,13        |             |
| Sodium/potassium-transporting ATPase subunit beta-3                  | P54709 AT1B3_HUMAN  |             |             |             |  |  |  |             |             |             |             |
|                                                                      |                     | 0,99        | <b>1,13</b> |             |  |  |  |             |             |             |             |
| Solute carrier family 1, member 4 variant (Fragment)                 | Q53F03 Q53F03_HUMAN | <b>1,32</b> | 1,00        | 1,25        |  |  |  |             |             |             |             |
| Solute carrier family 12 (Potassium/chloride transporters), member 6 | A0AV76 A0AV76_HUMAN | 0,96        | 0,93        | 0,94        |  |  |  |             |             |             |             |
| Solute carrier family 12 member 6                                    | Q9UHW9 S12A6_HUMAN  |             |             |             |  |  |  |             |             |             |             |
|                                                                      |                     | 1,09        | 1,02        |             |  |  |  |             |             |             |             |
| Solute carrier family 12 member 7                                    | Q9Y666 S12A7_HUMAN  | 1,52        | 2,12        | 4,57        |  |  |  |             |             |             |             |
|                                                                      |                     | 1,04        | 0,97        |             |  |  |  |             |             |             |             |
| Solute carrier family 16, member 1                                   | Q5T8R6 Q5T8R6_HUMAN | 2,48        | 2,15        | 2,23        |  |  |  |             |             |             |             |
|                                                                      |                     | 1,08        | 1,16        |             |  |  |  |             |             |             |             |
| Solute carrier family 16, member 3 variant (Fragment)                | Q1HE25 Q1HE25_HUMAN |             |             |             |  |  |  | 1,61        | 1,21        | <b>1,53</b> |             |
| Solute carrier family 2, facilitated glucose transporter member      | P11169 GTR3_HUMAN   | 1,14        | 1,28        | 1,22        |  |  |  |             |             |             |             |

|                                                                                                 |                     |      |      |      |      |      |      |      |
|-------------------------------------------------------------------------------------------------|---------------------|------|------|------|------|------|------|------|
| 3                                                                                               |                     | 1,06 | 0,97 |      |      |      |      |      |
| Solute carrier family 2, facilitated glucose transporter member 6                               | Q9UGQ3 GTR6_HUMAN   | 0,98 | 0,84 |      |      |      |      |      |
| Solute carrier family 22 member 18                                                              | Q96BI1 S22AI_HUMAN  | 0,83 | 1,12 | 1,18 |      |      |      |      |
|                                                                                                 |                     | 0,94 | 1,06 |      |      |      |      |      |
| Solute carrier family 25 (Mitochondrial carrier, Aralar), member 12                             | Q96AM8 Q96AM8_HUMAN | 0,89 | 1,07 | 0,89 |      |      |      |      |
|                                                                                                 |                     | 0,90 | 0,97 |      |      |      |      |      |
| Solute carrier family 25 member 35                                                              | Q3KQZ1 S2535_HUMAN  | 0,86 | 0,76 | 0,62 |      |      |      |      |
|                                                                                                 |                     | 0,82 | 0,76 |      |      |      |      |      |
| Solute carrier family 25 member 40                                                              | Q8TBP6 S2540_HUMAN  | 1,13 | 1,19 | 0,83 |      |      |      |      |
|                                                                                                 |                     | 0,97 | 0,81 |      |      |      |      |      |
| Solute carrier family 25 member 46                                                              | Q96AG3 S2546_HUMAN  | 0,86 | 0,84 |      |      |      |      |      |
| Solute carrier family 28 member 3                                                               | Q9HAS3 S28A3_HUMAN  | 1,14 | 0,58 |      |      |      |      |      |
| Solute carrier family 35 member E1                                                              | Q96K37 S35E1_HUMAN  | 0,00 | 0,00 |      |      |      |      |      |
| Solute carrier family 43 member 3                                                               | Q8NBI5 S43A3_HUMAN  | 1,40 | 1,10 | 1,58 | 0,00 | 0,00 | 0,00 |      |
|                                                                                                 |                     |      |      |      | 1,47 | 1,03 | 1,07 |      |
| Solute carrier family 6 (Neurotransmitter transporter, taurine), member 6 variant (Fragment)    | Q59GD7 Q59GD7_HUMAN | 0,97 | 0,85 |      |      |      |      |      |
| Solute carrier family 7 (Cationic amino acid transporter, y+ system), member 5                  | Q8IV97 Q8IV97_HUMAN | 1,52 | 1,12 | 1,07 |      |      |      |      |
|                                                                                                 |                     | 1,16 | 0,91 |      |      |      |      |      |
| SON protein                                                                                     | P18583 SON_HUMAN    |      |      |      |      |      | 0,82 | 0,46 |
|                                                                                                 |                     |      |      |      |      |      | 0,84 | 0,77 |
| Sorbitol dehydrogenase                                                                          | Q00796 DHSO_HUMAN   |      |      |      | 0,99 | 0,87 | 0,72 |      |
|                                                                                                 |                     |      |      |      | 0,87 | 0,85 | 0,82 |      |
| Sorcin                                                                                          | P30626 SORCN_HUMAN  |      |      |      | 0,99 | 1,00 | 1,60 |      |
| Sortilin precursor                                                                              | Q99523 SORT_HUMAN   | 1,05 | 0,67 | 0,70 |      |      |      |      |
|                                                                                                 |                     | 0,79 | 0,76 |      |      |      |      |      |
| Sorting and assembly machinery component 50 homolog                                             | Q9Y512 SAM50_HUMAN  | 1,34 | 1,11 | 0,93 |      |      |      |      |
|                                                                                                 |                     | 0,95 | 1,07 |      |      |      |      |      |
| Sorting nexin 1 isoform a variant (Fragment)                                                    | Q53HL9 Q53HL9_HUMAN |      |      |      | 0,66 | 0,89 | 0,61 |      |
| Sorting nexin 2 variant (Fragment)                                                              | Q53GG3 Q53GG3_HUMAN |      |      |      | 0,72 | 0,78 | 0,81 |      |
|                                                                                                 |                     |      |      |      | 0,85 | 0,79 | 0,70 |      |
| Sorting nexin 3                                                                                 | Q4TT31 Q4TT31_HUMAN |      |      |      | 0,79 | 0,66 | 0,58 |      |
|                                                                                                 |                     |      |      |      | 0,71 | 0,85 | 0,71 |      |
| Sorting nexin 5 variant (Fragment)                                                              | Q53FH8 Q53FH8_HUMAN |      |      |      | 0,61 | 0,72 | 0,61 |      |
| Sorting nexin-12                                                                                | Q9UMY4 SNX12_HUMAN  |      |      |      | 0,92 | 0,85 | 0,72 |      |
| Sorting nexin-6                                                                                 | Q9UNH7 SNX6_HUMAN   | 0,00 | 0,00 | 0,00 | 0,91 | 0,93 | 1,03 |      |
|                                                                                                 |                     |      |      |      | 0,00 | 0,00 | 0,00 |      |
| SPARC protein                                                                                   | Q6IBK4 Q6IBK4_HUMAN | 0,78 | 0,90 |      |      |      |      |      |
| Spatacin                                                                                        | Q96JI7 SPTCS_HUMAN  | 0,94 | 0,93 |      |      |      |      |      |
|                                                                                                 |                     | 0,94 | 0,83 | 0,90 |      |      |      |      |
| SPC18 protein                                                                                   | Q6IAM7 Q6IAM7_HUMAN | 0,98 | 0,96 |      |      |      |      |      |
| Spectrin SH3 domain binding protein 1                                                           |                     |      |      |      |      |      | 0,00 | 0,00 |
|                                                                                                 |                     |      |      |      |      |      | 0,00 | 0,00 |
| Spermatogenesis-associated protein 20 precursor                                                 | Q8TB22 SPT20_HUMAN  | 0,94 | 1,01 |      |      |      |      |      |
| Spermine synthase                                                                               | P52788 SPSY_HUMAN   |      |      |      | 1,17 | 1,19 | 0,93 |      |
| S-phase kinase-associated protein 1                                                             | P63208 SKP1_HUMAN   |      |      |      | 0,79 | 0,74 | 0,66 |      |
| Sphingosine-1-phosphate lyase 1                                                                 | Q95470 SGPL1_HUMAN  | 0,95 | 0,85 | 1,05 |      |      | 0,98 | 0,45 |
|                                                                                                 |                     | 1,02 | 1,13 |      |      |      | 2,29 | 5,27 |
| Sphingosine-1-phosphate phosphatase 1                                                           | Q9BX95 SGPP1_HUMAN  | 0,00 | 0,00 | 0,00 |      |      |      |      |
| Spleen tyrosine kinase                                                                          | Q5T6N7 Q5T6N7_HUMAN | 1,27 | 2,03 | 3,40 | 0,92 | 0,79 | 0,43 |      |
| Spliceosome RNA helicase BAT1                                                                   | Q13838 UAP56_HUMAN  |      |      |      |      |      | 0,46 | 0,77 |
|                                                                                                 |                     |      |      |      |      |      | 1,19 | 0,26 |
| Splicing factor 1                                                                               | Q15637 SF01_HUMAN   |      |      |      | 1,11 | 1,82 | 1,48 | 0,23 |
|                                                                                                 |                     |      |      |      | 1,20 | 1,50 | 1,04 | 0,38 |
| Splicing factor 3 subunit 1                                                                     | Q15459 SF3A1_HUMAN  |      |      |      |      |      | 0,28 | 0,28 |
|                                                                                                 |                     |      |      |      |      |      | 0,83 | 0,22 |
| Splicing factor 3A subunit 2                                                                    | Q15428 SF3A2_HUMAN  |      |      |      |      |      | 1,22 | 0,29 |
|                                                                                                 |                     |      |      |      |      |      | 0,45 | 0,20 |
| Splicing factor 3B subunit 1                                                                    | Q75533 SF3B1_HUMAN  |      |      |      |      |      | 0,84 | 0,32 |
|                                                                                                 |                     |      |      |      |      |      | 0,97 | 0,47 |
| Splicing factor 3B subunit 5                                                                    | Q9BWJ5 SF3B5_HUMAN  |      |      |      |      |      | 0,91 | 0,34 |
|                                                                                                 |                     |      |      |      |      |      | 1,70 | 0,58 |
| Splicing factor 3b, subunit 4, 49kDa                                                            | Q5S263 Q5S263_HUMAN |      |      |      |      |      | 0,97 | 0,48 |
|                                                                                                 |                     |      |      |      |      |      | 0,51 | 0,50 |
| Splicing factor 3b, subunit 4 variant (Fragment)                                                | Q53FG6 Q53FG6_HUMAN |      |      |      |      |      | 1,01 | 0,46 |
|                                                                                                 |                     |      |      |      |      |      | 1,08 | 0,51 |
| Splicing factor 45                                                                              | Q96I25 SPF45_HUMAN  |      |      |      |      |      | 0,84 | 0,54 |
|                                                                                                 |                     |      |      |      |      |      | 0,00 | 0,00 |
| Splicing factor proline/glutamine-rich                                                          | Q5S271 Q5S271_HUMAN | 0,54 | 0,73 | 2,18 | 1,37 | 2,77 | 2,41 | 0,21 |
|                                                                                                 |                     |      |      |      |      |      | 1,40 | 0,83 |
| Splicing factor proline/glutamine-rich                                                          | Q86VG2 Q86VG2_HUMAN |      |      |      | 0,98 | 1,78 | 1,25 | 0,84 |
| Splicing factor U2AF 35 kDa subunit                                                             | Q01081 U2AF1_HUMAN  |      |      |      |      |      | 0,83 | 0,24 |
|                                                                                                 |                     |      |      |      |      |      | 0,74 | 0,29 |
| Splicing factor, arginine/serine-rich 1                                                         | Q07955 SFRS1_HUMAN  |      |      |      |      |      | 0,99 | 0,34 |
|                                                                                                 |                     |      |      |      |      |      | 1,07 | 0,51 |
| Splicing factor, arginine/serine-rich 10 (Transformer 2 homolog, Drosophila) variant (Fragment) | Q59GA1 Q59GA1_HUMAN |      |      |      |      |      | 0,64 | 0,20 |
|                                                                                                 |                     |      |      |      |      |      | 1,05 | 0,34 |
| Splicing factor, arginine/serine-rich 11                                                        | Q8IWE6 Q8IWE6_HUMAN |      |      |      |      |      | 0,97 | 0,41 |
|                                                                                                 |                     |      |      |      |      |      | 0,99 | 0,76 |
| Splicing factor, arginine/serine-rich 12                                                        | Q8VXA9 SFR12_HUMAN  |      |      |      |      |      | 0,97 | 0,30 |
|                                                                                                 |                     |      |      |      |      |      | 1,21 | 0,49 |
| Splicing factor, arginine/serine-rich 16                                                        | Q8N2M8 SFR16_HUMAN  |      |      |      |      |      |      | 0,35 |
| Splicing factor, arginine/serine-rich 18                                                        | Q8TF01 SFR18_HUMAN  |      |      |      |      |      | 0,96 | 0,37 |
|                                                                                                 |                     |      |      |      |      |      | 0,00 | 0,00 |
| Splicing factor, arginine/serine-rich 2 variant (Fragment)                                      | Q53FN0 Q53FN0_HUMAN |      |      |      | 1,30 | 1,83 | 1,28 | 0,25 |
|                                                                                                 |                     |      |      |      | 1,27 | 1,30 | 0,97 | 0,00 |
| Splicing factor, arginine/serine-rich 3                                                         | P84103 SFRS3_HUMAN  | 0,78 | 1,22 | 2,19 |      |      | 1,21 | 0,60 |
|                                                                                                 |                     | 0,90 | 1,55 |      |      |      | 1,55 | 0,27 |
| Splicing factor, arginine/serine-rich 4                                                         | Q08170 SFRS4_HUMAN  | 0,81 | 1,24 | 2,27 |      |      | 1,24 | 0,87 |
|                                                                                                 |                     |      |      |      | 1,62 | 1,74 | 1,41 | 1,00 |
| Splicing factor, arginine/serine-rich 5                                                         | Q13243 SFRS5_HUMAN  |      |      |      |      |      | 1,05 | 0,48 |
|                                                                                                 |                     |      |      |      |      |      | 1,06 | 0,28 |
| Splicing factor, arginine/serine-rich 6                                                         | Q13247 SFRS6_HUMAN  |      |      |      |      |      | 0,96 | 0,50 |
|                                                                                                 |                     |      |      |      |      |      |      | 0,41 |
| Splicing factor, arginine/serine-rich 9                                                         | Q13242 SFRS9_HUMAN  |      |      |      |      |      | 0,77 | 0,56 |
|                                                                                                 |                     |      |      |      |      |      | 0,89 | 0,71 |
| SPRY domain-containing protein 4                                                                | Q8WW59 SPRY4_HUMAN  | 1,15 | 1,28 | 1,21 |      |      | 0,31 | 0,27 |
|                                                                                                 |                     | 1,12 | 1,26 |      |      |      |      | 0,74 |
| SPTLC1 protein                                                                                  | Q6NUL7 Q6NUL7_HUMAN | 0,00 | 0,00 | 0,00 |      |      |      | 0,23 |
| SRA stem-loop-interacting RNA-binding protein, mitochondrial precursor                          | Q9GZT3 SLIRP_HUMAN  | 0,86 | 0,74 | 0,58 |      |      | 1,90 | 0,38 |
|                                                                                                 |                     | 0,94 | 1,01 |      |      |      | 7,22 | 0,75 |
|                                                                                                 |                     |      |      |      | 1,53 | 0,88 | 0,75 | 7,63 |

|                                                                                                          |                     |                            |                            |             |                            |                            |                             |                     |                            |                            |
|----------------------------------------------------------------------------------------------------------|---------------------|----------------------------|----------------------------|-------------|----------------------------|----------------------------|-----------------------------|---------------------|----------------------------|----------------------------|
| Src homology 3 domain-containing protein HIP-55                                                          | A4D2I9 A4D2I9_HUMAN |                            |                            |             | <b>0,81</b><br>0,00        | <b>0,83</b><br>0,00        | <b>0,79</b><br>0,00         |                     |                            |                            |
| Src kinase-associated phosphoprotein 2                                                                   | O75563 SKAP2_HUMAN  |                            |                            |             |                            |                            |                             | 1,04                | 0,80                       | 0,21                       |
| Signal recognition particle receptor subunit alpha                                                       | P08240 SRPR_HUMAN   | 0,92<br>1,01               | <b>1,42</b><br><b>1,29</b> | <b>1,84</b> |                            |                            |                             | 1,41<br>0,71        | 1,58<br>0,88               | 1,65<br>1,47               |
| Staphylococcal nuclease domain-containing protein 1                                                      | Q7KZF4 SND1_HUMAN   | 0,94<br><b>1,65</b>        | 1,02<br><b>1,24</b>        | <b>2,02</b> | 1,28<br>1,81               | 1,16<br><b>1,31</b>        | 1,03<br><b>1,28</b>         |                     |                            |                            |
| StAR-related lipid transfer protein 3                                                                    | Q14849 STAR3_HUMAN  | 1,05                       | 1,23                       | 0,95        |                            |                            |                             |                     |                            |                            |
| Stathmin                                                                                                 | P16949 STMN1_HUMAN  |                            |                            |             | 0,95<br>0,58               | 0,86<br>0,65               | <b>0,64</b><br>0,52         |                     |                            |                            |
| Steroid receptor RNA activator 1                                                                         | Q9HD15 SRA1_HUMAN   |                            |                            |             | 0,00                       | 0,00                       | 0,00                        |                     |                            |                            |
| Sterol carrier protein 2                                                                                 | Q5VVZ1 Q5VVZ1_HUMAN | 1,03<br>1,03               | 0,89<br>1,01               | <b>0,80</b> | <b>1,49</b><br><b>1,40</b> | 1,15<br>1,06               | <b>1,61</b><br>1,19         | 1,16                | <b>3,27</b>                | <b>3,88</b>                |
| Sterol O-acyltransferase 1                                                                               | P35610 SOAT1_HUMAN  | 0,88<br>0,91               | 0,93<br>1,12               | 1,00        | 2,56                       | <b>0,77</b>                | 1,01                        | 1,77<br><b>0,38</b> | 4,49<br><b>2,10</b>        | 9,37<br><b>3,27</b>        |
| Sterol-4-alpha-carboxylate 3-dehydrogenase, decarboxylating                                              | Q15738 NSDHL_HUMAN  | 0,99<br>0,99               | 1,08<br><b>1,22</b>        | 1,21        |                            |                            |                             |                     |                            |                            |
| Steryl-sulfatase precursor                                                                               | P08842 STS_HUMAN    | 0,00                       | 0,00                       | 0,00        |                            |                            |                             |                     |                            |                            |
| Stomatin-like protein 2                                                                                  | Q9UJ21 STML2_HUMAN  | 0,84<br>1,10               | 0,88<br>0,95               | <b>0,75</b> |                            |                            |                             | 1,53                | <b>4,42</b>                | <b>5,08</b>                |
| Stress-induced-phosphoprotein 1                                                                          | Q5TZU9 Q5TZU9_HUMAN |                            |                            |             | 1,43<br><b>0,80</b>        | 0,94<br><b>0,93</b>        | 0,90<br>0,97<br><b>0,89</b> | <b>1,89</b>         | <b>2,55</b>                | <b>3,01</b>                |
| Striatin                                                                                                 | O43815 STRN_HUMAN   | 0,90                       | 0,58                       | 0,82        |                            |                            |                             |                     |                            |                            |
| Stromal cell-derived factor 2 precursor                                                                  | Q99470 SDF2_HUMAN   | 0,92<br><b>0,79</b>        | <b>1,17</b><br>0,90        | 1,06        |                            |                            |                             | 0,86                | <b>1,95</b>                | <b>2,30</b>                |
| Stromal interaction molecule 1                                                                           | Q8N382 Q8N382_HUMAN | 0,97<br><b>1,19</b>        | 1,14<br><b>1,29</b>        | 1,29        |                            |                            |                             |                     |                            |                            |
| Structural maintenance of chromosomes protein 1A                                                         | Q14683 SMC1A_HUMAN  |                            |                            |             |                            |                            |                             | 1,08<br><b>0,57</b> | 1,04<br>0,89               | 0,83<br>1,16               |
| Structural maintenance of chromosomes protein 3                                                          | Q9UQE7 SMC3_HUMAN   |                            |                            |             |                            |                            |                             | 0,68<br><b>0,43</b> | 0,55<br><b>0,40</b>        | 0,60<br><b>0,42</b>        |
| STXBP2 protein                                                                                           | Q9BU65 Q9BU65_HUMAN |                            |                            |             | 0,00                       | 0,00                       | 0,00                        |                     |                            |                            |
| Succinate dehydrogenase [ubiquinone] flavoprotein subunit, mitochondrial precursor                       | P31040 DHSA_HUMAN   | 1,00                       | 0,99                       |             |                            |                            |                             |                     |                            |                            |
| Succinate dehydrogenase [ubiquinone] iron-sulfur subunit, mitochondrial precursor                        | P21912 DHSB_HUMAN   | 1,01<br>1,04               | 1,03<br>0,96               | <b>0,88</b> | 1,74                       | 1,02                       | 1,17                        |                     |                            |                            |
| Succinate dehydrogenase complex, subunit A, flavoprotein variant (Fragment)                              | Q59GW8 Q59GW8_HUMAN | 0,97                       | 0,96                       | <b>0,84</b> |                            |                            |                             |                     |                            |                            |
| Succinate dehydrogenase cytochrome b560 subunit, mitochondrial precursor                                 | Q99643 C560_HUMAN   | 1,19                       | 1,37                       |             |                            |                            |                             |                     |                            |                            |
| Succinic semialdehyde dehydrogenase precursor                                                            | Q546H9 Q546H9_HUMAN | <b>0,69</b><br>0,95        | 0,82<br><b>0,90</b>        | 0,58        |                            |                            |                             |                     |                            |                            |
| Succinyl-CoA ligase [ADP-forming] beta-chain, mitochondrial precursor                                    | Q9P2R7 SUCB1_HUMAN  | <b>0,86</b><br><b>1,12</b> | 0,93<br>0,98               | <b>0,81</b> |                            |                            |                             |                     |                            |                            |
| Succinyl-CoA ligase [GDP-forming] beta-chain, mitochondrial precursor                                    | Q96I99 SUCB2_HUMAN  | <b>0,92</b><br><b>1,26</b> | 0,95<br><b>1,07</b>        | <b>0,70</b> | 2,01                       | <b>1,42</b>                | <b>1,88</b>                 |                     |                            |                            |
| Succinyl-CoA:3-ketoacid-coenzyme A transferase 1, mitochondrial precursor                                | P55809 SCOT_HUMAN   | 0,97<br>1,06               | 0,99<br><b>1,08</b>        | 0,89        |                            |                            |                             |                     |                            |                            |
| SUCLG1 protein                                                                                           | Q6IAL5 Q6IAL5_HUMAN | 1,01<br>1,06               | 0,89<br>1,06               | <b>0,79</b> | 1,77<br>1,99               | <b>1,25</b><br>1,35        | 2,09<br>1,55                |                     |                            |                            |
| Sugar phosphate exchanger 2                                                                              | Q8TED4 SPX2_HUMAN   | <b>0,63</b><br>0,89        | <b>0,69</b><br><b>1,23</b> | 0,86        |                            |                            |                             |                     |                            |                            |
| Sulfatase-modifying factor 1 precursor                                                                   | Q8NBK3 SUMF1_HUMAN  | 0,00<br>0,99               | 0,00<br>1,07               | 0,00        |                            |                            |                             |                     |                            |                            |
| Sulfatase-modifying factor 2 precursor                                                                   | Q8NBJ7 SUMF2_HUMAN  | 0,97<br>0,82               | 1,06<br>1,01               | 1,04        |                            |                            |                             |                     |                            |                            |
| Sulfide:quinone oxidoreductase, mitochondrial precursor                                                  | Q9Y6N5 SQRD_HUMAN   | 1,07<br><b>0,94</b>        | 1,00<br>0,99               | <b>0,88</b> | <b>1,95</b><br><b>1,80</b> | 1,13<br>1,12               | 1,34<br><b>1,27</b>         | 1,04<br><b>0,47</b> | <b>2,23</b><br><b>2,43</b> | <b>4,75</b><br><b>3,82</b> |
| Sulfotransferase family, cytosolic, 1A, phenol-preferring, member 2                                      | Q14CJ7 Q14CJ7_HUMAN |                            |                            |             | <b>0,71</b>                | 0,78                       | 0,68                        |                     |                            |                            |
| SUMO-activating enzyme subunit 1                                                                         | Q9UBE0 SAE1_HUMAN   |                            |                            |             | 1,01<br>0,00               | 1,12<br>0,00               | 1,10<br>0,00                |                     |                            |                            |
| SUMO-activating enzyme subunit 2                                                                         | Q9UBT2 SAE2_HUMAN   |                            |                            |             | 0,94<br>0,00               | 0,87<br>0,00               | 0,88<br>0,00                |                     |                            |                            |
| Superoxide dismutase [Cu-Zn]                                                                             | P00441 SODC_HUMAN   |                            |                            |             | 0,83<br>0,67               | 1,03<br>0,98               | 1,02<br>0,99                |                     |                            |                            |
| Superoxide dismutase [Mn], mitochondrial precursor                                                       | P04179 SODM_HUMAN   | <b>0,90</b><br><b>1,07</b> | 0,95<br><b>1,20</b>        | <b>0,63</b> | <b>2,00</b><br><b>1,83</b> | <b>1,81</b><br><b>1,64</b> | <b>3,16</b><br><b>2,19</b>  |                     |                            |                            |
| Surfeit 1                                                                                                | Q5T8T3 Q5T8T3_HUMAN | 1,16<br>0,98               | 0,95<br><b>0,84</b>        | <b>0,83</b> |                            |                            |                             |                     |                            |                            |
| Surfeit 4                                                                                                | Q5T8U6 Q5T8U6_HUMAN | 0,95<br>1,03               | <b>1,59</b><br>1,27        | <b>1,81</b> |                            |                            |                             |                     |                            |                            |
| Surfeit 5 (Fragment)                                                                                     | Q5T8T8 Q5T8T8_HUMAN |                            |                            |             |                            |                            |                             | 0,74                | 0,35                       | 0,14                       |
| Survival of motor neuron-related-splicing factor 30                                                      | O75940 SPF30_HUMAN  |                            |                            |             |                            |                            |                             | 0,77<br>0,81        | 0,51<br>1,03               | <b>0,27</b><br>0,70        |
| SWI/SNF-related matrix-associated actin-dependent regulator of chromatin c2 isoform b variant (Fragment) | Q59GV3 Q59GV3_HUMAN |                            |                            |             |                            |                            |                             | <b>0,77</b>         | <b>0,17</b>                | <b>0,14</b>                |
| SWI/SNF-related matrix-associated actin-dependent regulator of chromatin subfamily A member 5            | O60264 SMCA5_HUMAN  |                            |                            |             |                            |                            |                             | <b>0,23</b>         | <b>0,35</b>                | <b>0,31</b>                |
| SWI/SNF-related matrix-associated actin-dependent regulator of chromatin subfamily C member 2            | Q8TAQ2 SMRC2_HUMAN  |                            |                            |             |                            |                            |                             | <b>0,78</b>         | <b>0,30</b>                | <b>0,30</b>                |
| SWI/SNF-related matrix-associated actin-dependent regulator of chromatin subfamily E member 1            | Q969G3 SMCE1_HUMAN  |                            |                            |             |                            |                            |                             | 0,91<br>1,08        | <b>0,19</b><br><b>0,26</b> | <b>0,15</b><br><b>0,26</b> |
| Synaptic glycoprotein SC2                                                                                | Q9NZ01 GPSN2_HUMAN  | 0,96<br>0,89               | 1,13<br>1,06               | 1,06        |                            |                            |                             | 1,21<br>0,69        | 2,09<br><b>1,83</b>        | <b>3,29</b><br><b>2,36</b> |
| Synaptic vesicle membrane protein VAT-1 homolog                                                          | Q99536 VAT1_HUMAN   | 0,85<br>1,02               | 1,30<br>1,05               | 1,23        |                            |                            |                             |                     |                            |                            |
| Synaptogyrin-1                                                                                           | O43759 SNG1_HUMAN   | 1,04<br>0,71               | 0,81<br>0,44               | <b>0,52</b> | 1,01                       | 1,12                       | 1,16                        |                     |                            |                            |
| Synaptogyrin-2                                                                                           | O43760 SNG2_HUMAN   | 1,09<br>0,85               | 0,97<br><b>0,78</b>        | 0,92        |                            |                            |                             |                     |                            |                            |
| Synaptophysin-like protein 1                                                                             | Q16563 SYPL1_HUMAN  | 1,14<br>0,91               | 1,01<br>1,00               | 1,10        |                            |                            |                             |                     |                            |                            |
| Synaptosomal-associated protein 23                                                                       | O00161 SNP23_HUMAN  | 1,26<br>1,01               | 0,95<br>1,04               | 0,98        | 1,65                       | 0,94                       | 1,42                        | <b>0,77</b><br>0,66 | <b>0,17</b><br>0,85        | <b>0,14</b><br>0,74        |
| Synaptosomal-associated protein 29                                                                       | O95721 SNP29_HUMAN  | 1,25                       | 0,90                       |             |                            |                            |                             |                     |                            |                            |
| SYNGR2 protein                                                                                           | Q3KQZ2 Q3KQZ2_HUMAN |                            |                            |             | 2,58                       | 1,28                       | 2,77                        |                     |                            |                            |
| Syntaxin 3A                                                                                              | Q53YE2 Q53YE2_HUMAN | 0,00<br>1,04               | 0,00<br>1,04               | 0,00        |                            |                            |                             |                     |                            |                            |
| Syntaxin binding protein 2 variant (Fragment)                                                            | Q53GF4 Q53GF4_HUMAN | <b>1,26</b>                | 1,06                       |             | 0,90                       | 0,97                       | 0,94                        |                     |                            |                            |
| Syntaxin-12                                                                                              | Q86Y82 STX12_HUMAN  | 0,85<br>0,99               | <b>0,69</b><br>1,03        | <b>0,65</b> | 1,68                       | 1,86                       | 1,48                        |                     |                            |                            |
| Syntaxin-5                                                                                               | Q13190 STX5_HUMAN   |                            |                            |             |                            |                            |                             | 0,72                | 1,12                       | 0,95                       |
| Syntaxin-7                                                                                               | O15400 STX7_HUMAN   | 1,00<br>1,09               | 0,67<br>1,00               | <b>0,38</b> | <b>1,55</b>                | 1,18                       | 1,06                        |                     |                            |                            |
| Syntaxin-8                                                                                               | Q9UNK0 STX8_HUMAN   | 1,03<br>0,98               | <b>1,17</b><br>1,10        | 1,34        |                            |                            |                             |                     |                            |                            |
| Syntaxin-binding protein 2                                                                               | Q15833 STXB2_HUMAN  | 1,24                       | 1,04                       | 1,22        |                            |                            |                             |                     |                            |                            |

|                                                                                                              |                     |                            |                                    |             |                            |                            |                            |                            |                             |
|--------------------------------------------------------------------------------------------------------------|---------------------|----------------------------|------------------------------------|-------------|----------------------------|----------------------------|----------------------------|----------------------------|-----------------------------|
|                                                                                                              |                     |                            |                                    |             | 1,04                       | 0,98                       | 0,90                       |                            |                             |
| Syntaxin-binding protein 3                                                                                   | O00186 STXB3_HUMAN  | 1,15<br>1,27               | 0,87<br>1,18                       | 1,09        |                            |                            |                            |                            |                             |
| Syntenin-1                                                                                                   | O00560 SDCB1_HUMAN  | 0,84                       | <b>0,81</b>                        | <b>0,80</b> |                            |                            |                            |                            |                             |
| SYT protein (Fragment)                                                                                       | Q8TDQ9 Q8TDQ9_HUMAN |                            |                                    |             | 0,85                       | <b>0,42</b>                | <b>0,33</b>                |                            |                             |
| TAGLN2 protein                                                                                               | Q6FGI1 Q6FGI1_HUMAN |                            |                                    |             | <b>0,85</b><br>0,58        | 0,93<br>0,86               | <b>0,84</b><br>0,68        |                            |                             |
| Talin-1                                                                                                      | Q9Y490 TLN1_HUMAN   | <b>1,39</b><br>1,18        | <b>1,24</b><br>1,17                | <b>2,44</b> | <b>0,90</b><br><b>1,05</b> | <b>1,08</b><br>1,12        | 1,03<br><b>1,16</b>        | 0,85<br>0,73               | <b>1,44</b><br>1,19         |
| TAP2 protein (Fragment)                                                                                      | Q9UQ60 Q9UQ60_HUMAN |                            |                                    |             | 1,08                       | 0,73                       | 1,10                       |                            |                             |
| TAP binding protein                                                                                          | A2ABC0 A2ABC0_HUMAN | 0,92<br>0,94               | 0,97<br>1,05                       | 1,06        |                            |                            |                            |                            |                             |
| Tapasin precursor                                                                                            | O15533 TPSN_HUMAN   |                            |                                    |             | <b>2,13</b>                | 1,02                       | 1,01                       | <b>0,81</b>                | 21,82<br>4,99               |
| Tapasin-related protein precursor                                                                            | Q9BX59 TPSNR_HUMAN  | 0,00<br>0,84               | 0,00<br>1,25                       | 0,00        |                            |                            |                            |                            | 31,45<br>7,13               |
| TAR DNA binding protein variant (Fragment)                                                                   | Q53H27 Q53H27_HUMAN |                            |                                    |             |                            |                            |                            | <b>0,44</b>                | <b>0,33</b><br><b>0,29</b>  |
| Target of myb1                                                                                               | Q86X74 Q86X74_HUMAN |                            |                                    |             | 0,92<br>0,84               | 0,99<br>0,92               | <b>0,71</b><br>0,87        |                            |                             |
| Target of Myb protein 1                                                                                      | O60784 TOM1_HUMAN   |                            |                                    |             |                            |                            |                            |                            |                             |
| Tartrate-resistant acid phosphatase type 5 precursor                                                         | P13686 PPA5_HUMAN   | 1,05<br>0,96               | 0,82<br><b>0,76</b>                | 0,75        | <b>1,66</b>                | <b>0,56</b>                | <b>0,81</b>                | <b>0,81</b><br><b>0,73</b> | <b>1,22</b><br>0,77         |
| TATA-binding protein-associated factor 2N                                                                    | Q92804 RBP56_HUMAN  |                            |                                    |             | 1,17                       | 2,20                       | <b>1,86</b>                | 1,03<br><b>1,26</b>        | <b>0,19</b><br><b>0,31</b>  |
| TBC1 domain family member 15                                                                                 | Q8TC07 TBC15_HUMAN  | 0,00                       | 0,00                               | 0,00        |                            |                            |                            |                            | <b>0,27</b>                 |
| TBCA protein                                                                                                 | Q6FGD7 Q6FGD7_HUMAN |                            |                                    |             | <b>0,76</b><br>0,56        | <b>0,86</b><br><b>0,73</b> | <b>0,75</b><br>0,60        |                            |                             |
| T-cell surface glycoprotein CD1b precursor                                                                   | P29016 CD1B_HUMAN   | 0,00                       | 0,00                               | 0,00        |                            |                            |                            |                            |                             |
| T-cell, immune regulator 1, ATPase, H+ transporting, lysosomal V0 subunit A3                                 | Q8WVC5 Q8WVC5_HUMAN | 1,09<br><b>0,91</b>        | 1,13<br>0,95                       | <b>1,18</b> |                            |                            |                            | 1,43<br>0,67               | <b>6,03</b><br><b>1,74</b>  |
| T-complex protein 1 subunit alpha                                                                            | P17987 TCPA_HUMAN   |                            |                                    |             | <b>0,80</b><br>0,82        | 1,19<br>1,01               | <b>1,21</b><br>0,90        |                            |                             |
| T-complex protein 1 subunit beta                                                                             | P78371 TCPB_HUMAN   | 1,17<br>1,16               | 0,94<br>1,16                       | 1,39        | 0,86<br><b>0,67</b>        | 1,05<br>0,98               | 1,12<br>0,91               |                            |                             |
| T-complex protein 1 subunit delta                                                                            | P50991 TCPD_HUMAN   |                            |                                    |             | <b>0,74</b><br>0,90        | 1,01<br>1,04               | 1,06<br>1,20               |                            |                             |
| T-complex protein 1 subunit eta                                                                              | Q99832 TCPE_HUMAN   |                            |                                    |             | <b>0,75</b><br>0,94        | 1,13<br><b>1,27</b>        | <b>1,16</b><br><b>1,22</b> |                            |                             |
| T-complex protein 1 subunit theta                                                                            | P50990 TCPQ_HUMAN   | <b>1,66</b><br>1,08        | <b>2,30</b><br>1,17                | <b>5,72</b> | <b>0,74</b><br><b>0,86</b> | 1,07<br>1,11               | 1,02<br><b>1,23</b>        |                            |                             |
| T-complex protein 1 subunit zeta                                                                             | P40227 TCPZ_HUMAN   |                            |                                    |             | <b>0,79</b>                | 1,05                       | 1,09                       |                            |                             |
| Telomeric repeat-binding factor 2                                                                            | Q15554 TERF2_HUMAN  |                            |                                    |             |                            |                            |                            | <b>0,88</b><br>0,00        | 0,37<br>0,00                |
| Testin                                                                                                       | Q9UGI8 TES_HUMAN    |                            |                                    |             | 0,96<br>0,94               | 0,94<br>0,95               | 1,00<br>1,24               |                            |                             |
| Testis-expressed sequence 264 protein precursor                                                              | Q9Y6I9 TX264_HUMAN  | 0,90<br>0,85               | 1,06<br>1,20                       | 1,02        |                            |                            |                            |                            |                             |
| Tetratricopeptide repeat domain 19                                                                           | Q2M248 Q2M248_HUMAN |                            |                                    |             | 1,93                       | 1,00                       | 1,06                       |                            |                             |
| Tetratricopeptide repeat protein 35                                                                          | Q15006 TTC35_HUMAN  | 0,87<br>1,00<br>0,93       | 0,83<br>1,22<br>1,05               | 1,13        |                            |                            |                            | 0,90                       | <b>2,43</b><br><b>2,56</b>  |
| TFAM protein (Fragment)                                                                                      | Q6LES8 Q6LES8_HUMAN | 0,90<br><b>1,12</b>        | 0,90<br>1,01                       | <b>0,84</b> |                            |                            |                            | <b>0,66</b><br><b>1,16</b> | 1,05<br><b>1,87</b>         |
| Thioesterase superfamily member 2                                                                            | Q9NPJ3 THEM2_HUMAN  | 0,82<br>0,91               | 0,82<br><b>0,84</b>                | <b>0,51</b> |                            |                            |                            | 0,94<br>0,62               | <b>1,41</b><br>1,24         |
| Thiopurine S-methyltransferase                                                                               | P51580 TPMT_HUMAN   |                            |                                    |             | 0,00<br>1,00<br>0,89       | 0,00<br>0,95<br>0,84       | 0,00<br>0,97<br>0,65       |                            | 1,56                        |
| Thioredoxin delta 3 (Fragment)                                                                               | O60744 O60744_HUMAN |                            |                                    |             | <b>0,72</b>                | 0,90                       | <b>0,85</b>                |                            |                             |
| Thioredoxin domain-containing protein 1 precursor                                                            | Q9H3N1 TXND1_HUMAN  | 1,15<br>0,96               | 1,12<br>1,05                       | <b>1,21</b> | <b>1,56</b>                | 0,95                       | 0,94                       |                            | <b>10,29</b><br>2,99        |
| Thioredoxin domain-containing protein 12 precursor                                                           | Q95881 TXD12_HUMAN  | 0,00<br>0,97               | 0,00<br><b>1,21</b>                | 0,00        |                            |                            |                            |                            | 7,34                        |
| Thioredoxin domain-containing protein 13 precursor                                                           | Q9H1E5 TXD13_HUMAN  | 0,87<br>0,97               | 1,04<br>0,93                       | 1,08        |                            |                            |                            |                            |                             |
| Thioredoxin domain-containing protein 14 precursor                                                           | Q9Y320 TXD14_HUMAN  | 0,90<br>1,04               | 1,08<br>1,69                       | 1,10        |                            |                            |                            |                            |                             |
| Thioredoxin domain-containing protein 17                                                                     | Q9BRA2 TXD17_HUMAN  |                            |                                    |             | 0,52                       | 0,76                       | 0,46                       |                            |                             |
| Thioredoxin domain-containing protein 4 precursor                                                            | Q9BS26 TXND4_HUMAN  | 1,15<br>0,95               | 1,05<br><b>0,93</b>                | 1,06        | <b>1,75</b><br>1,67        | 0,96<br>1,18               | <b>1,87</b><br><b>1,52</b> | 1,03<br>1,08               | <b>2,65</b><br><b>2,37</b>  |
| Thioredoxin domain-containing protein 5 precursor                                                            | Q8NBS9 TXND5_HUMAN  | 0,90<br>0,95               | 1,02<br>1,06                       | 0,93        |                            |                            |                            | <b>2,35</b>                | <b>2,72</b><br><b>16,79</b> |
| Thioredoxin reductase 2 isoform 1 variant (Fragment)                                                         | Q59ET7 Q59ET7_HUMAN | 0,00                       | 0,00                               |             |                            |                            |                            |                            |                             |
| Thioredoxin reductase 2, mitochondrial precursor                                                             | Q9NNW7 TRXR2_HUMAN  | 1,04<br>0,94               | 0,86<br>1,13                       | 0,63        |                            |                            |                            |                            |                             |
| Thioredoxin, mitochondrial precursor                                                                         | Q99757 THIOM_HUMAN  | <b>0,86</b><br>0,99        | <b>0,77</b><br>1,00                | <b>0,58</b> | 2,00<br>1,08               | 2,08<br>0,90               | 2,27<br>1,15               |                            |                             |
| Thioredoxin-dependent peroxide reductase, mitochondrial precursor                                            | P30048 PRDX3_HUMAN  | <b>0,90</b><br><b>1,14</b> | <b>0,87</b><br>0,98                | <b>0,74</b> | <b>1,80</b><br>1,92        | <b>1,42</b><br><b>1,38</b> | <b>2,35</b><br>1,96        |                            |                             |
| Thioredoxin-like 1 variant (Fragment)                                                                        | Q59G46 Q59G46_HUMAN |                            |                                    |             | 0,00<br>0,71               | 0,00<br>1,07               | 0,00<br>0,45               |                            |                             |
| Thioredoxin-like 3                                                                                           | Q5JV01 Q5JV01_HUMAN |                            |                                    |             | 1,09                       | 1,12                       | 0,66                       |                            |                             |
| THO complex 2                                                                                                | Q5JZ12 Q5JZ12_HUMAN |                            |                                    |             |                            |                            |                            | 0,78<br><b>0,60</b>        | 0,30<br>0,62                |
| THO complex subunit 1                                                                                        | Q96FV9 THOC1_HUMAN  |                            |                                    |             |                            |                            |                            |                            | <b>0,19</b><br>0,49         |
| THO complex subunit 4                                                                                        | Q86V81 THOC4_HUMAN  | 0,85<br><b>0,88</b>        | 0,88<br>0,99                       | 0,78        | 1,08                       | 1,22                       | 0,99                       | 0,47<br>1,05               | 0,72<br><b>0,35</b>         |
| THO complex subunit 6 homolog                                                                                | Q86W42 THOC6_HUMAN  |                            |                                    |             |                            |                            |                            |                            | <b>0,18</b><br><b>0,47</b>  |
| THO complex subunit 7 homolog                                                                                | Q6I9Y2 THOC7_HUMAN  |                            |                                    |             |                            |                            |                            | 0,00<br>0,82               | 0,00<br><b>0,40</b>         |
| THRAP3 protein (Fragment)                                                                                    | Q6PJV4 Q6PJV4_HUMAN |                            |                                    |             |                            |                            |                            | 0,00<br>1,04               | 0,00<br>0,85                |
| Threonyl-tRNA synthetase variant (Fragment)                                                                  | Q53GX7 Q53GX7_HUMAN |                            |                                    |             | 1,13                       | 0,97                       | 1,14                       |                            |                             |
| Threonyl-tRNA synthetase, mitochondrial precursor                                                            | Q9BW92 SYTM_HUMAN   |                            |                                    |             |                            |                            |                            |                            |                             |
| Thromboxane A synthase 1 (Platelet, cytochrome P450, family 5, subfamily A) isoform TXS-I variant (Fragment) | Q53F23 Q53F23_HUMAN | 1,02<br>0,90<br>1,04       | 1,05<br><b>1,13</b><br><b>1,13</b> | 1,05        |                            |                            |                            |                            |                             |
| Thymidine phosphorylase precursor                                                                            | P19971 TYPH_HUMAN   |                            |                                    |             | 1,02<br><b>0,84</b>        | 1,02<br>0,96               | 1,11<br>0,94               |                            |                             |
| Thymocyte nuclear protein 1                                                                                  | Q9P016 THYN1_HUMAN  |                            |                                    |             |                            |                            |                            | 1,04<br>0,94               | <b>0,45</b><br>0,59         |
| Thymosin-like 4                                                                                              | Q5T4B6 Q5T4B6_HUMAN |                            |                                    |             |                            |                            |                            | 0,97                       | <b>0,42</b><br><b>0,24</b>  |
| Thyroid hormone receptor-associated protein 3                                                                | Q9Y2W1 TR150_HUMAN  | <b>2,37</b>                | <b>2,15</b>                        |             |                            |                            |                            | 0,98<br><b>1,12</b>        | <b>0,65</b><br><b>1,20</b>  |
|                                                                                                              |                     |                            |                                    |             |                            |                            |                            |                            | <b>0,32</b><br><b>0,74</b>  |

|                                                                   |                     |              |              |       |                      |                      |                      |              |              |              |
|-------------------------------------------------------------------|---------------------|--------------|--------------|-------|----------------------|----------------------|----------------------|--------------|--------------|--------------|
| TIM21-like protein, mitochondrial precursor                       | Q9BVV7 TIT21L_HUMAN | 1,11<br>0,97 | 1,15<br>1,05 | 0,95  |                      |                      |                      |              |              |              |
| Tissue alpha-L-fucosidase precursor                               | P04066 FUCO_HUMAN   | 1,09<br>0,86 | 0,90<br>0,99 |       |                      |                      |                      |              |              |              |
| Titin                                                             | Q8WZ42 TITIN_HUMAN  | 0,96<br>0,96 | 1,04<br>1,04 | 1,19  | 1,50<br>1,07         | 1,19<br>0,91         | 1,62<br>0,92         | 1,07<br>1,12 | 1,07<br>1,16 | 0,91<br>1,40 |
| TMED5 protein                                                     | Q49AG2 Q49AG2_HUMAN |              |              |       |                      |                      |                      | 1,13         | 2,88         | 4,50         |
| TMSB4X protein (Fragment)                                         | Q0P5Q0 Q0P5Q0_HUMAN | 1,10         | 1,23         | 1,30  | 0,60<br>0,49         | 0,75<br>0,58         | 0,64<br>0,48         |              |              |              |
| TNF receptor-associated protein 1 variant (Fragment)              | Q59EK6 Q59EK6_HUMAN |              |              |       | 0,00                 | 0,00                 | 0,00                 |              |              |              |
| Toll-like receptor 2 precursor                                    | O60603 TLR2_HUMAN   | 1,11<br>1,07 | 0,97<br>0,93 |       |                      |                      |                      |              |              |              |
| Toll-like receptor 8 precursor                                    | Q9NR97 TLR8_HUMAN   | 0,98<br>0,88 | 0,80<br>0,80 | 0,98  |                      |                      |                      |              |              |              |
| Torsin family protein C9orf167                                    | Q9NXH8 C1167_HUMAN  | 0,88<br>1,00 | 0,84<br>0,95 | 0,79  |                      |                      |                      |              |              |              |
| Torsin-1A precursor                                               | O14656 TOR1A_HUMAN  | 1,02         | 1,27         |       |                      |                      |                      |              |              |              |
| Torsin-1A-interacting protein 1                                   | Q5JTV8 TOIP1_HUMAN  | 0,94<br>0,94 | 1,19<br>1,07 | 1,37  | 0,00                 | 0,00                 | 0,00                 | 1,28         | 1,08         | 1,11         |
| Torsin-1A-interacting protein 2                                   | Q8NFO8 TOIP2_HUMAN  | 0,91<br>1,07 | 0,91<br>1,28 | 0,74  |                      |                      |                      |              |              |              |
| Torsin-1B precursor                                               | O14657 TOR1B_HUMAN  | 0,00         | 0,00         |       |                      |                      |                      |              |              |              |
| TPD52L2 protein                                                   | Q6FGS1 Q6FGS1_HUMAN | 0,63         | 0,75         | 0,54  | 0,62                 | 0,80                 | 0,46                 |              |              |              |
| TP53-regulated inhibitor of apoptosis 1                           | O43715 TRIA1_HUMAN  | 1,18<br>2,33 | 0,94<br>3,84 |       |                      |                      |                      |              |              |              |
| TPMsk3 (Fragment)                                                 | Q8TCG3 Q8TCG3_HUMAN |              |              | 10,36 |                      |                      |                      |              |              |              |
| TraB domain-containing protein                                    | Q9H4I3 TRABD_HUMAN  | 1,04<br>1,00 | 0,98<br>1,16 | 0,90  |                      |                      |                      |              |              |              |
| TRAM1 protein                                                     | Q6FHL3 Q6FHL3_HUMAN |              |              | 1,19  |                      |                      |                      |              |              |              |
| TRAM1 protein (Fragment)                                          | Q6FHU7 Q6FHU7_HUMAN |              |              |       |                      |                      |                      | 0,00<br>0,00 | 0,00<br>0,00 | 0,00<br>0,00 |
| Trans-2-enoyl-CoA reductase, mitochondrial precursor              | Q9BV79 MECR_HUMAN   | 0,81<br>0,91 | 0,93<br>0,95 | 0,90  |                      |                      |                      |              |              |              |
| Transaldolase                                                     | P37837 TALDO_HUMAN  |              |              |       | 0,84<br>0,87         | 1,01<br>1,14         | 0,94<br>0,89         |              |              |              |
| Transcription elongation factor B polypeptide 1                   | Q15369 ELOC_HUMAN   |              |              |       | 0,95<br>0,00         | 1,08<br>0,00         | 0,81<br>0,00         | 0,94         | 0,51         | 0,25         |
| Transcription elongation factor B polypeptide 2                   | Q15370 ELOB_HUMAN   |              |              |       | 0,89<br>0,80         | 0,87<br>0,83         | 0,87<br>0,72         | 1,01         | 0,85         | 0,44         |
| Transcription elongation factor B polypeptide 3                   | Q14241 ELOA1_HUMAN  |              |              |       |                      |                      |                      | 1,23<br>1,81 | 0,54<br>1,23 | 0,33<br>0,66 |
| Transcription elongation factor SPT5                              | O00267 SPT5H_HUMAN  |              |              |       |                      |                      |                      | 0,45         | 0,67         | 0,53         |
| Transcription elongation regulator 1                              | O14776 TCRG1_HUMAN  |              |              |       |                      |                      |                      | 0,77<br>0,84 | 0,33<br>0,44 | 0,28<br>0,42 |
| Transcription factor BTF3                                         | P20290 BTF3_HUMAN   |              |              |       | 0,84                 | 0,82                 | 0,89                 | 0,64<br>1,17 | 1,66<br>1,95 | 1,29<br>2,01 |
| Transcription factor BTF3 homolog 4                               | Q96K17 BT3L4_HUMAN  |              |              |       | 1,00                 | 0,73                 | 0,78                 | 0,95         | 2,18         | 2,37         |
| Transcription factor MatF                                         | Q9ULX9 MAFF_HUMAN   |              |              |       |                      |                      |                      | 0,90         | 0,08         | 0,04         |
| Transcription factor PU,1                                         | P17947 SPI1_HUMAN   |              |              |       |                      |                      |                      | 0,63<br>0,84 | 0,19<br>0,46 | 0,20<br>0,40 |
| Transcription initiation factor TFIID subunit 9                   | Q16594 TAF9_HUMAN   |              |              |       |                      |                      |                      | 0,00<br>0,00 | 0,00<br>0,00 | 0,00<br>0,00 |
| Transcription intermediary factor 1-beta                          | Q13263 TIF1B_HUMAN  |              |              |       |                      |                      |                      | 0,74<br>0,56 | 0,36<br>0,43 | 0,40<br>0,26 |
| Transcriptional regulator                                         | Q6IEH8 Q6IEH8_HUMAN |              |              |       |                      |                      |                      | 1,01         | 0,69         | 0,62         |
| Transcriptional repressor p66 alpha                               | Q86YP4 P66A_HUMAN   |              |              |       |                      |                      |                      | 0,74<br>1,08 | 0,16<br>0,50 | 0,12<br>0,39 |
| Transcriptional repressor p66 beta                                | Q8WXI9 P66B_HUMAN   |              |              |       |                      |                      |                      | 1,07<br>1,09 | 0,34<br>0,35 | 0,26<br>0,20 |
| Transcriptional repressor protein YY1                             | P25490 TTY1_HUMAN   |              |              |       |                      |                      |                      | 0,81<br>0,82 | 0,29<br>0,33 | 0,23<br>0,36 |
| Transducin beta-like 2 protein                                    | Q9Y4P3 TBL2_HUMAN   | 0,90<br>0,91 | 0,88<br>1,07 | 0,83  |                      |                      |                      |              |              |              |
| Transferrin                                                       | Q06AH7 Q06AH7_HUMAN | 1,04         | 1,06         |       |                      |                      |                      |              |              |              |
| Transferrin receptor                                              | Q1HE24 Q1HE24_HUMAN | 0,94         | 0,48         | 0,54  |                      |                      |                      |              |              |              |
| Transferrin variant (Fragment)                                    | Q53H26 Q53H26_HUMAN | 1,19         | 0,81         | 0,87  | 1,88<br>1,67<br>1,58 | 1,01<br>1,00<br>1,08 | 1,35<br>1,34<br>1,23 |              |              |              |
| Transforming growth factor beta-1 precursor                       | P01137 TGFB1_HUMAN  | 0,90         | 1,00         |       |                      |                      |                      | 0,00         | 0,00         | 0,00         |
| Transglutaminase 2                                                | Q6B838 Q6B838_HUMAN | 2,11         | 3,79         | 9,17  | 0,95                 | 1,09                 | 0,80                 |              |              |              |
| Trans-Golgi network integral membrane protein 2 precursor         | O43493 TGON2_HUMAN  | 1,23<br>1,15 | 0,85<br>0,92 | 0,79  | 1,64                 | 0,70                 | 0,62                 |              |              |              |
| Transient receptor potential cation channel subfamily V member 2  | Q9Y5S1 TRPV2_HUMAN  | 1,20<br>1,07 | 0,87<br>1,00 | 0,94  |                      |                      |                      |              |              |              |
| Transketolase variant (Fragment)                                  | Q53EM5 Q53EM5_HUMAN | 1,36         | 1,60         |       | 0,91<br>1,07         | 1,10<br>1,26         | 0,93<br>1,06         |              |              |              |
| Translation initiation factor eIF-2B subunit alpha                | Q14232 EI2BA_HUMAN  |              |              |       | 1,05<br>0,00         | 0,71<br>0,00         | 0,98<br>0,00         |              |              |              |
| Translation initiation factor IF-2, mitochondrial precursor       | P46199 IF2M_HUMAN   | 1,11<br>1,03 | 1,25<br>1,05 |       |                      |                      |                      |              |              |              |
| Translocase of inner mitochondrial membrane 44 homolog (Fragment) | Q53G69 Q53G69_HUMAN | 1,01<br>1,01 | 0,94<br>0,94 | 0,83  |                      |                      |                      |              |              |              |
| Translocase of inner mitochondrial membrane 50 homolog            | Q0VAB1 Q0VAB1_HUMAN | 0,82<br>1,02 | 0,82<br>1,01 | 0,70  |                      |                      |                      |              |              |              |
| Translocase of outer mitochondrial membrane 70 homolog A          | Q6P0M2 Q6P0M2_HUMAN |              |              |       |                      |                      |                      | 0,79<br>0,61 | 0,90<br>1,19 | 1,51<br>1,48 |
| Translocated promoter region                                      | Q5SWY0 Q5SWY0_HUMAN |              |              |       |                      |                      |                      | 0,69<br>0,63 | 0,35<br>0,49 | 0,24<br>0,39 |
| Translocation protein SEC62                                       | Q99442 SEC62_HUMAN  | 1,02<br>1,05 | 1,14<br>1,21 | 1,14  | 2,19                 | 0,93                 | 1,18                 | 1,17<br>1,11 | 2,98<br>3,69 | 5,94<br>7,02 |
| Translocation protein SEC63 homolog                               | Q9UGP8 SEC63_HUMAN  | 0,91<br>1,01 | 1,04<br>1,08 | 1,05  |                      |                      |                      | 0,36         | 3,01         | 4,91         |
| Translocon-associated protein subunit alpha precursor             | P43307 SSRA_HUMAN   | 0,97<br>1,01 | 1,09<br>1,18 | 1,03  | 1,39                 | 1,01                 | 0,70                 | 0,88         | 2,55         | 3,07         |
| Translocon-associated protein subunit delta precursor             | P51571 SSRD_HUMAN   | 1,28<br>1,13 | 1,29<br>1,14 | 1,18  |                      |                      |                      | 1,29<br>0,00 | 2,65<br>0,00 | 3,30<br>0,00 |
| Translocon-associated protein subunit gamma                       | Q9UNL2 SSRG_HUMAN   | 0,93<br>0,79 | 0,95<br>1,08 | 0,82  |                      |                      |                      | 1,07         | 1,61         | 2,36         |
| Transmembrane 7 superfamily member 3 precursor                    | Q9NS93 TM7S3_HUMAN  | 1,12         | 0,89         |       |                      |                      |                      |              |              |              |
| Transmembrane 9 superfamily member 1 precursor                    | O15321 TM9S1_HUMAN  | 0,00         | 0,00         | 0,00  |                      |                      |                      |              |              |              |
| Transmembrane 9 superfamily member 2 precursor                    | Q99805 TM9S2_HUMAN  | 1,25<br>0,97 | 0,75<br>0,80 | 0,85  |                      |                      |                      |              |              |              |
| Transmembrane 9 superfamily member 3 precursor                    | Q9HD45 TM9S3_HUMAN  | 1,17         | 0,62         | 0,69  |                      |                      |                      |              |              |              |

|                                                                     |                     |                            |                            |             |                            |                            |                            |                            |                                                          |
|---------------------------------------------------------------------|---------------------|----------------------------|----------------------------|-------------|----------------------------|----------------------------|----------------------------|----------------------------|----------------------------------------------------------|
|                                                                     |                     | 1,05                       | 0,90                       |             |                            |                            |                            |                            |                                                          |
| Transmembrane 9 superfamily member 4 precursor                      | Q92544 TM9S4_HUMAN  | 0,99<br>1,04               | <b>0,56</b><br>0,99        | <b>0,59</b> |                            |                            |                            |                            |                                                          |
| Transmembrane and coiled-coil domain-containing protein 1           | Q9UM00 TMCO1_HUMAN  | <b>1,21</b><br>1,00        | 1,19<br><b>1,35</b>        | <b>1,32</b> | 1,73                       | 1,09                       | 0,66                       | 0,97<br>1,05               | <b>1,78</b><br>1,81<br><b>2,12</b><br>1,92               |
| Transmembrane and coiled-coil domain-containing protein 3 precursor | Q6UWJ1 TMCO3_HUMAN  | 1,09<br>1,16               | 1,16<br>0,95               | 1,20        |                            |                            |                            |                            |                                                          |
| Transmembrane emp24 domain-containing protein 1 precursor           | Q13445 TMED1_HUMAN  | 1,12<br><b>0,70</b>        | 1,06<br>0,93               | <b>1,24</b> |                            |                            |                            | 1,73                       | <b>7,69</b><br><b>10,93</b>                              |
| Transmembrane emp24 domain-containing protein 10 precursor          | P49755 TMEDA_HUMAN  | 1,00                       | 1,06                       |             |                            |                            |                            |                            |                                                          |
| Transmembrane emp24 domain-containing protein 3 precursor           | Q9Y3Q3 TMED3_HUMAN  | 0,00<br>0,92               | 0,00<br>0,94               | 0,00        |                            |                            |                            |                            |                                                          |
| Transmembrane emp24 domain-containing protein 4 precursor           | Q7Z7H5 TMED4_HUMAN  | 1,27<br>0,98               | 0,88<br>0,93               | 1,09        |                            |                            |                            | 1,04                       | <b>4,76</b><br><b>6,25</b>                               |
| Transmembrane emp24 domain-containing protein 5 precursor           | Q9Y3A6 TMED5_HUMAN  | 1,25<br><b>0,85</b>        | 1,09<br>0,93               | 1,18        |                            |                            |                            |                            |                                                          |
| Transmembrane emp24 domain-containing protein 7 precursor           | Q9Y3B3 TMED7_HUMAN  | 1,07<br>0,96               | 0,79<br><b>0,76</b>        | 0,82        |                            |                            |                            | 0,63                       | <b>4,94</b><br>2,25                                      |
| Transmembrane emp24 domain-containing protein 9 precursor           | Q9BVK6 TMED9_HUMAN  | 1,13<br>0,98               | 1,04<br><b>1,18</b>        | <b>1,36</b> |                            |                            |                            | 1,06<br><b>1,57</b>        | <b>2,96</b><br><b>3,57</b><br><b>4,28</b><br><b>6,49</b> |
| Transmembrane glycoprotein NMB precursor                            | Q14956 GPNMB_HUMAN  | 1,03                       | 0,95                       |             | <b>1,54</b><br><b>1,77</b> | <b>0,76</b><br><b>0,60</b> | 1,08<br>1,03               | <b>1,58</b><br><b>2,27</b> | <b>3,31</b>                                              |
| Transmembrane protein 109 precursor                                 | Q9BVC6 TM109_HUMAN  | 0,81<br>0,95               | 1,04<br><b>1,16</b>        | 0,96        | 1,89<br><b>1,90</b>        | 0,65<br>0,84               | 0,79<br>0,89               | 1,04<br>1,01               | <b>3,71</b><br>2,16<br><b>4,13</b><br>2,72               |
| Transmembrane protein 11                                            | P17152 TMM11_HUMAN  | 0,87<br>0,92               | 0,92<br>0,99               | 0,93        |                            |                            |                            |                            |                                                          |
| Transmembrane protein 111                                           | Q9P0I2 TM111_HUMAN  | 0,77<br>0,78               | 0,76<br>0,85               | 0,71        |                            |                            |                            |                            |                                                          |
| Transmembrane protein 126A                                          | Q9H061 T126A_HUMAN  | 1,13<br>1,05               | 1,13<br>0,93               | 0,81        |                            |                            |                            |                            |                                                          |
| Transmembrane protein 126B                                          | Q8IUX1 T126B_HUMAN  | 0,00                       | 0,00                       | 0,00        |                            |                            |                            |                            |                                                          |
| Transmembrane protein 160                                           | Q9NX00 TM160_HUMAN  | 0,37<br>0,83               | 0,75<br>0,55               | 0,70        |                            |                            |                            | 0,00                       | 0,00<br>0,00                                             |
| Transmembrane protein 165                                           | Q9HC07 TM165_HUMAN  | 3,46                       | 0,91                       | 1,66        |                            |                            |                            |                            |                                                          |
| Transmembrane protein 16F                                           | Q4KMQ2 TM16F_HUMAN  | 1,02<br>0,95               | <b>0,87</b><br>1,06        | 1,05        |                            |                            |                            |                            |                                                          |
| Transmembrane protein 16K                                           | Q9NW15 TM16K_HUMAN  | <b>1,19</b>                | 1,00                       | 1,04        |                            |                            |                            |                            |                                                          |
| Transmembrane protein 173                                           | Q86WV6 TM173_HUMAN  | 0,85                       | 0,66                       |             |                            |                            |                            |                            |                                                          |
| Transmembrane protein 19                                            | Q96HH6 TMM19_HUMAN  | 1,07<br>0,00               | 1,14<br>0,00               | 0,00        |                            |                            |                            |                            |                                                          |
| Transmembrane protein 192                                           | Q8IY95 TM192_HUMAN  | 1,17<br>0,98               | 1,25<br>1,21               | 1,19        |                            |                            |                            | 0,00<br>0,00               | 0,00<br>0,00                                             |
| Transmembrane protein 205                                           | Q6UW68 TM205_HUMAN  | 1,02<br>0,85               | 0,92<br>0,66               |             |                            |                            |                            | 0,87                       | <b>2,89</b><br><b>2,57</b>                               |
| Transmembrane protein 32 precursor                                  | Q8N4V1 TMM32_HUMAN  | 0,94<br><b>0,87</b>        | 1,01<br>0,90               | 1,02        | 1,78                       | 0,88                       | 0,72                       |                            |                                                          |
| Transmembrane protein 41A precursor                                 | Q96HV5 TM41A_HUMAN  | <b>0,82</b>                | 1,10                       |             |                            |                            |                            |                            |                                                          |
| Transmembrane protein 43                                            | Q9BTV4 TMM43_HUMAN  | <b>0,81</b><br>0,97        | 1,02<br><b>1,19</b>        | 1,03        | 1,68                       | 1,13                       | 1,24                       | 1,72                       | 4,99<br>5,71                                             |
| Transmembrane protein 63A                                           | Q94886 TM63A_HUMAN  | 1,24<br>0,91               | <b>0,88</b><br>0,98        | 0,67        |                            |                            |                            |                            |                                                          |
| Transmembrane protein 65                                            | Q6PI78 TMM65_HUMAN  | 1,16                       | 0,93                       |             |                            |                            |                            |                            |                                                          |
| Transmembrane protein 70                                            | Q9BUB7 TMM70_HUMAN  | 0,00<br>0,52               | 0,00<br>0,72               | 0,00        |                            |                            |                            |                            |                                                          |
| Transmembrane protein 85                                            | Q5J8M3 TMM85_HUMAN  | 1,75<br>0,97               | 1,71<br>1,07               | 0,79        |                            |                            |                            | 5,32                       | 8,31                                                     |
| Transmembrane protein 93                                            | Q9BV81 TMM93_HUMAN  | 1,20<br>1,23               | 0,91<br>1,26               | 0,93        |                            |                            |                            |                            |                                                          |
| Transporter 1, ATP-binding cassette, sub-family B                   | Q96CP4 Q96CP4_HUMAN | 1,06                       | 1,76                       | 1,56        |                            |                            |                            |                            |                                                          |
| Transporter 1 ATP-binding cassette sub-family B                     | B1AZV3 B1AZV3_HUMAN | 0,96                       | 1,31                       |             |                            |                            |                            |                            |                                                          |
| Transportin-1                                                       | Q92973 TNPO1_HUMAN  |                            |                            |             | 0,79                       | 0,91                       | 0,59                       |                            |                                                          |
| TRAP1 protein (Fragment)                                            | Q9BV61 Q9BV61_HUMAN | 0,93                       | <b>0,89</b>                | <b>0,64</b> |                            |                            |                            |                            |                                                          |
| Treacle protein                                                     | Q13428 TCOF_HUMAN   |                            |                            |             | 0,82                       | 4,17                       | 7,96                       | 1,03<br><b>1,50</b>        | <b>0,49</b><br>1,15<br><b>0,26</b><br>1,08               |
| Tricarboxylate transport protein, mitochondrial precursor           | P53007 TXTP_HUMAN   | 1,00                       | 0,92                       | <b>0,79</b> |                            |                            |                            |                            |                                                          |
| Trifunctional enzyme subunit alpha, mitochondrial precursor         | P40939 ECHA_HUMAN   | <b>0,92</b><br>0,99        | <b>0,88</b><br>0,99        | <b>0,75</b> | <b>2,08</b><br><b>2,04</b> | <b>1,51</b><br>1,16        | 1,74<br><b>1,63</b>        | <b>1,48</b><br><b>0,48</b> | <b>3,30</b><br><b>2,45</b><br><b>9,46</b><br><b>4,07</b> |
| Trifunctional enzyme subunit beta, mitochondrial precursor          | P55084 ECHB_HUMAN   | <b>0,92</b><br><b>0,94</b> | <b>0,90</b><br><b>0,94</b> | <b>0,79</b> | <b>2,24</b><br><b>2,35</b> | <b>1,26</b><br><b>1,27</b> | <b>1,79</b><br><b>1,47</b> | <b>1,10</b><br><b>0,74</b> | <b>2,29</b><br><b>2,32</b><br><b>3,89</b><br><b>3,87</b> |
| Trifunctional purine biosynthetic protein adenosine-3               | P22102 PUR2_HUMAN   |                            |                            |             | 1,09                       | 1,09                       | 1,06                       |                            |                                                          |
| Trimeric intracellular cation channel type B                        | Q9NVV0 TM38B_HUMAN  | 0,00                       | 0,00                       | 0,00        |                            |                            |                            |                            |                                                          |
| Triosephosphate isomerase (Fragment)                                | Q6FHP9 Q6FHP9_HUMAN | 2,09                       | 2,87                       | 3,01        | <b>0,87</b><br>0,74        | 0,95<br><b>0,84</b>        | <b>0,89</b><br>0,71        |                            |                                                          |
| Triosephosphate isomerase (Fragment)                                | Q53HE2 Q53HE2_HUMAN | 0,84                       | 0,97                       |             |                            |                            |                            |                            |                                                          |
| TRIP12 protein                                                      | Q14CA3 Q14CA3_HUMAN |                            |                            |             |                            |                            |                            | 1,23<br>1,27               | 1,11<br>1,25<br>1,00<br>1,05                             |
| Tripartite motif protein TRIM19 kappa                               | Q9BZX7 Q9BZX7_HUMAN |                            |                            |             |                            |                            |                            | 0,00<br><b>0,52</b>        | 0,00<br>0,73<br>0,00<br><b>0,37</b>                      |
| Tripeptidyl-peptidase 1 precursor                                   | O14773 TPP1_HUMAN   | <b>1,17</b><br>0,91        | <b>1,30</b><br><b>0,94</b> | 1,10        | <b>2,11</b><br>1,78        | 0,86<br>0,89               | 1,05<br>0,68               | 1,61<br>2,09               | <b>1,97</b><br><b>2,78</b><br>0,95<br>1,49               |
| Tripeptidyl-peptidase I variant (Fragment)                          | Q53HP2 Q53HP2_HUMAN |                            |                            |             |                            |                            |                            |                            |                                                          |
| tRNA pseudouridine synthase A                                       | Q9Y606 TRUA_HUMAN   | 1,02                       | 1,05                       |             |                            |                            |                            |                            |                                                          |
| tRNA-nucleotidyltransferase 1, mitochondrial precursor              | Q96Q11 TRNT1_HUMAN  | 0,98                       | 0,97                       |             |                            |                            |                            |                            |                                                          |
| Tropomodulin-3                                                      | Q9NYL9 TMOD3_HUMAN  | 1,05                       | 1,16                       | 2,63        | <b>0,73</b><br><b>0,65</b> | 0,98<br><b>0,83</b>        | 1,04<br><b>0,70</b>        | <b>1,31</b><br>1,22        | <b>2,64</b><br><b>4,12</b><br><b>2,39</b><br><b>3,95</b> |
| Tropomyosin 3                                                       | Q5VU59 Q5VU59_HUMAN |                            |                            |             | 1,01<br>0,64               | 1,06<br>0,72               | 1,04<br><b>0,67</b>        | <b>1,49</b>                | <b>4,04</b><br><b>4,85</b>                               |
| Tropomyosin alpha-4 chain                                           | P67936 TPM4_HUMAN   | 1,39<br>1,71               | 2,02<br><b>1,71</b>        | 3,56        | 0,93<br><b>0,73</b>        | 0,98<br><b>0,80</b>        | 0,98<br><b>0,82</b>        | <b>1,93</b><br>1,28        | <b>2,96</b><br><b>2,71</b><br><b>3,33</b><br><b>3,36</b> |
| Tropomyosin isoform                                                 | Q15657 Q15657_HUMAN |                            |                            |             | 0,84                       | 0,83                       | 1,12                       |                            |                                                          |
| Trypsin-1 precursor                                                 | P07477 TRY1_HUMAN   |                            |                            |             | 1,55                       | <b>1,51</b>                | <b>1,91</b>                |                            |                                                          |
| TST protein                                                         | Q6IB06 Q6IB06_HUMAN | 1,11<br>1,08               | 1,24<br>0,95               |             |                            |                            |                            |                            |                                                          |
| TUBB6 protein                                                       | Q2NKY5 Q2NKY5_HUMAN |                            |                            |             | 0,00                       | 0,00                       | 0,00                       |                            |                                                          |
| Tubulin alpha-1A chain                                              | Q71U36 TBA1A_HUMAN  | 1,34                       | <b>4,15</b>                | <b>8,16</b> | 0,99                       | 0,82                       | 0,47                       |                            |                                                          |

|                                                                         |                     |      |      |      |      |      |      |      |      |      |
|-------------------------------------------------------------------------|---------------------|------|------|------|------|------|------|------|------|------|
| Tubulin alpha-1C chain                                                  | Q9BQE3 TBA1C_HUMAN  | 1,29 | 2,65 |      | 0,89 | 0,84 | 0,58 | 0,67 | 3,31 | 3,71 |
| Tubulin alpha-4A chain                                                  | P68366 TBA4A_HUMAN  | 0,00 | 0,00 | 0,00 | 0,55 | 0,66 | 0,50 |      |      |      |
| Tubulin beta-4 chain                                                    | P04350 TBB4_HUMAN   | 0,99 | 1,39 | 2,17 | 0,81 | 0,85 | 0,91 |      |      |      |
| Tubulin beta-6 chain                                                    | Q9BUF5 TBB6_HUMAN   |      |      |      |      | 0,65 | 0,28 |      |      |      |
| Tubulin folding cofactor B                                              | Q99426 TBCB_HUMAN   |      |      |      | 0,74 | 0,96 | 0,54 |      |      |      |
| Tubulin, alpha 2                                                        | Q12YQ1 Q12YQ1_HUMAN |      |      |      | 0,76 | 0,85 | 0,72 | 1,54 | 2,76 | 4,97 |
| Tubulin, beta                                                           | Q5SU16 Q5SU16_HUMAN | 1,23 | 2,56 | 8,01 | 0,67 | 0,68 | 0,58 |      |      |      |
| Tubulin, beta 2C                                                        | Q8N6N5 Q8N6N5_HUMAN |      |      |      | 0,81 | 0,61 | 0,58 | 0,73 | 2,62 | 4,19 |
| Tubulin-tyrosine ligase-like protein 12                                 | Q14166 TTL12_HUMAN  |      |      |      | 0,66 | 0,84 | 0,67 |      |      |      |
| Tumor necrosis factor receptor superfamily member 5 precursor           | P25942 TNRS_HUMAN   | 1,40 | 1,11 | 1,01 |      | 0,74 | 0,43 | 1,08 | 0,88 | 1,03 |
| Tumor necrosis factor, alpha-induced protein 8                          | O95379 TFIP8_HUMAN  | 1,05 | 1,04 |      |      |      |      | 1,20 | 1,46 | 2,29 |
| Tumor protein, translationally-controlled 1                             | Q5W0H4 Q5W0H4_HUMAN |      |      |      | 0,83 | 0,82 | 0,81 |      |      |      |
| Tumor rejection antigen (Gp96) 1                                        | Q5CAQ5 Q5CAQ5_HUMAN | 0,91 | 1,03 | 1,04 | 0,59 | 0,79 | 0,65 |      |      |      |
| Twinfilin-2                                                             | Q6IBS0 TWF2_HUMAN   | 0,98 | 1,14 |      | 0,94 | 1,03 | 0,90 |      |      |      |
| TXN protein (Fragment)                                                  | Q53X69 Q53X69_HUMAN | 1,52 | 2,31 | 3,85 | 2,05 | 1,29 | 2,16 | 0,89 | 2,19 | 5,78 |
| Type-1 angiotensin II receptor-associated protein                       | Q6RW13 ATRAP_HUMAN  | 0,90 | 1,51 |      | 2,28 | 1,33 | 1,67 | 0,71 | 2,18 | 3,86 |
| TYROBP protein                                                          | Q6FGA5 Q6FGA5_HUMAN | 1,06 | 0,91 | 1,26 | 0,75 | 0,98 | 0,95 |      |      |      |
| Tyrosine-protein kinase HCK                                             | P08631 HCK_HUMAN    | 0,73 | 0,66 |      | 0,84 | 0,98 | 1,09 | 0,90 | 4,41 | 4,70 |
| Tyrosine-protein kinase receptor                                        | A6P4V4 A6P4V4_HUMAN |      |      |      | 1,44 | 0,79 | 0,79 | 1,44 | 3,99 | 3,81 |
| Tyrosine-protein kinase receptor                                        | Q8TDJ5 Q8TDJ5_HUMAN |      |      |      |      |      |      |      |      |      |
| Tyrosine-protein phosphatase non-receptor type 1                        | P18031 PTN1_HUMAN   | 0,75 | 1,22 | 2,06 |      |      |      |      |      |      |
| Tyrosine-protein phosphatase non-receptor type 12                       | Q05209 PTN12_HUMAN  |      |      |      | 0,95 | 1,13 | 1,00 |      |      |      |
| Tyrosine-protein phosphatase non-receptor type 23                       | Q9H3S7 PTN23_HUMAN  |      |      |      | 0,00 | 0,00 | 0,00 |      |      |      |
| Tyrosine-protein phosphatase non-receptor type substrate 1 precursor    | P78324 SHP51_HUMAN  | 1,23 | 0,64 | 0,67 |      |      |      |      |      |      |
| Tyrosyl-tRNA synthetase, cytoplasmic                                    | P54577 SYTC_HUMAN   | 1,22 | 0,79 |      | 0,00 | 0,00 | 0,00 |      |      |      |
| Tyrosyl-tRNA synthetase, mitochondrial precursor                        | Q9Y2Z4 SYTM_HUMAN   | 1,14 | 1,84 | 6,24 | 0,80 | 0,80 | 0,62 | 1,24 | 1,71 | 2,19 |
| U1 small nuclear ribonucleoprotein 70 kDa                               | P08621 RU17_HUMAN   | 0,94 | 0,79 | 0,65 | 0,95 | 0,91 | 0,76 | 0,56 | 1,07 | 0,80 |
| U1 small nuclear ribonucleoprotein A                                    | P09012 SNRPA_HUMAN  | 1,04 | 1,03 |      |      |      |      |      |      |      |
| U2 small nuclear ribonucleoprotein B''                                  | P08579 RU2B_HUMAN   |      |      |      |      |      |      | 0,92 | 0,25 | 0,17 |
| U2 small nuclear RNA auxiliary factor 2                                 | Q96HC5 Q96HC5_HUMAN |      |      |      | 1,11 | 2,71 | 1,97 | 1,13 | 0,46 | 0,29 |
| U2-associated protein SR140                                             | O15042 SR140_HUMAN  |      |      |      | 0,73 | 1,85 | 1,24 | 1,52 | 0,62 | 0,60 |
| U3 small nucleolar RNA-interacting protein 2                            | Q43818 U3P2_HUMAN   |      |      |      |      |      |      | 1,02 | 0,49 | 0,31 |
| U4/U6 small nuclear ribonucleoprotein Prp31                             | Q8WWY3 PRP31_HUMAN  |      |      |      | 0,00 | 0,00 | 0,00 | 1,26 | 0,63 | 0,58 |
| U4/U6,U5 tri-snRNP-associated protein 1                                 | Q43290 SNUT1_HUMAN  |      |      |      | 1,36 | 3,31 | 2,64 | 1,04 | 0,27 | 0,19 |
| U4/U6,U5 tri-snRNP-associated protein 2                                 | Q53GS9 SNUT2_HUMAN  |      |      |      |      |      |      | 1,11 | 0,49 | 0,48 |
| U5 small nuclear ribonucleoprotein 200 kDa helicase                     | O75643 U520_HUMAN   |      |      |      |      |      |      | 1,02 | 0,83 | 0,60 |
| U5-116KD protein                                                        | Q6IBM8 Q6IBM8_HUMAN |      |      |      |      |      |      | 0,58 | 0,63 | 0,72 |
| U6 snRNA-associated Sm-like protein LSM4                                | Q9Y4Z0 LSM4_HUMAN   |      |      |      |      |      |      | 0,00 | 0,00 | 0,00 |
| U6 snRNA-associated Sm-like protein LSM7                                | Q9UK45 LSM7_HUMAN   |      |      |      |      |      |      | 0,69 | 0,29 | 0,08 |
| U6 snRNA-associated Sm-like protein LSM8                                | O95777 LSM8_HUMAN   |      |      |      |      |      |      | 0,92 | 0,26 | 0,12 |
| Ubiquilin-2                                                             | Q9UHD9 UBQL2_HUMAN  |      |      |      |      |      |      | 1,08 | 0,54 | 0,35 |
| Ubiquinol-cytochrome c reductase complex chaperone CBP3 homolog         | Q9NVA1 UQCC_HUMAN   | 0,88 | 0,97 | 1,10 |      |      |      | 0,42 | 0,90 | 0,60 |
| Ubiquinone biosynthesis methyltransferase COQ5, mitochondrial precursor | Q5HYK3 COQ5_HUMAN   | 0,98 | 0,77 |      |      |      |      | 1,01 | 0,57 | 0,58 |
| Ubiquinone biosynthesis monooxygenase COQ6                              | Q9Y2Z9 COQ6_HUMAN   | 0,96 | 0,73 |      |      |      |      | 0,30 | 0,51 | 0,46 |
| Ubiquinone biosynthesis protein COQ9, mitochondrial precursor           | O75208 COQ9_HUMAN   | 0,89 | 0,79 |      |      |      |      | 1,12 | 0,49 | 0,30 |
| Ubiquitin A-52 residue ribosomal protein fusion product 1               | Q3MIH3 Q3MIH3_HUMAN | 1,02 | 1,03 | 0,99 |      |      |      | 1,01 | 0,42 | 0,35 |
| Ubiquitin carboxyl-terminal hydrolase 15                                | Q9Y4E8 UBP15_HUMAN  | 0,75 | 0,84 |      |      |      |      | 0,88 | 0,49 | 0,29 |
| Ubiquitin carboxyl-terminal hydrolase 5                                 | P45974 UBP5_HUMAN   | 0,97 | 1,01 | 1,05 | 0,94 | 0,91 | 0,67 | 1,17 | 0,54 | 0,28 |
| Ubiquitin-associated protein 2-like                                     | Q14157 UBP2L_HUMAN  |      |      |      | 0,00 | 0,00 | 0,00 | 1,17 | 0,54 | 0,28 |
| Ubiquitin-conjugating enzyme E2 J1                                      | Q9Y385 UBZJ1_HUMAN  |      |      |      |      |      |      | 0,00 | 0,00 | 0,00 |
| Ubiquitin-conjugating enzyme E2 K                                       | P61086 UBE2K_HUMAN  | 1,02 | 1,11 |      |      |      |      |      |      |      |
| Ubiquitin-conjugating enzyme E2 L3                                      | P68036 UB2L3_HUMAN  |      |      |      | 0,88 | 1,26 | 1,06 |      |      |      |
| Ubiquitin-conjugating enzyme E2 N                                       | P61088 UBE2N_HUMAN  |      |      |      | 0,83 | 1,05 | 0,88 |      |      |      |
| Ubiquitin-conjugating enzyme E2 variant 1                               | Q13404 UB2V1_HUMAN  |      |      |      | 1,05 | 1,12 | 0,96 |      |      |      |
| Ubiquitin-conjugating enzyme E2 variant 2                               | Q15819 UB2V2_HUMAN  |      |      |      | 1,13 | 0,84 | 0,97 | 0,70 | 0,29 | 0,23 |
| Ubiquitin-fold modifier 1                                               | Q5VXS0 Q5VXS0_HUMAN |      |      |      | 0,89 | 0,78 | 0,76 | 0,92 | 0,71 | 0,53 |
| Ubiquitin-like modifier activating enzyme 1                             | Q5JRR8 Q5JRR8_HUMAN |      |      |      |      |      |      |      |      |      |
| Ubiquitin-like modifier activating enzyme 7                             | Q9BRB2 Q9BRB2_HUMAN | 1,60 | 1,53 | 2,64 | 0,77 | 0,89 | 0,77 |      |      |      |
| Ubiquitin-like modifier-activating enzyme 6                             | A0AVT1 UBA6_HUMAN   | 1,11 | 1,32 |      | 0,64 | 0,79 | 0,68 |      |      |      |
| Ubiquitin-like protein 5                                                | Q9BZL1 UBL5_HUMAN   |      |      |      | 0,87 | 0,80 | 0,60 |      |      |      |
|                                                                         |                     |      |      |      |      |      |      |      |      |      |

|                                                                                  |                     |             |             |             |             |             |                                     |
|----------------------------------------------------------------------------------|---------------------|-------------|-------------|-------------|-------------|-------------|-------------------------------------|
|                                                                                  |                     |             |             | 0,00        | 0,00        | 0,00        |                                     |
| UBX domain-containing protein 8                                                  | Q96CS3 UBXD8_HUMAN  | 1,05        | 1,27        |             |             |             |                                     |
| UDP galactose 4-epimerase                                                        | Q38G75 Q38G75_HUMAN |             |             | 0,00        | 0,00        | 0,00        |                                     |
| UDP-glucose:glycoprotein glucosyltransferase 1 precursor                         | Q9NYU2 UGGG1_HUMAN  | 1,03        | <b>1,14</b> | 1,08        |             |             | 1,60 1,70 4,84                      |
|                                                                                  |                     | <b>0,93</b> | <b>1,09</b> |             |             |             |                                     |
| UDP-glucuronic acid decarboxylase 1                                              | Q8NBZ7 UXS1_HUMAN   | 1,18        | 1,06        |             |             |             |                                     |
| UDP-N-acetylglucosamine-dolichyl-phosphate N-acetylglucosaminophosphotransferase | Q9H3H5 GPT_HUMAN    | 0,98        | 1,13        | 1,02        |             |             |                                     |
| UMP-CMP kinase                                                                   | P30085 KCY_HUMAN    | 0,90        | 1,11        |             | 0,75        | 0,86        | <b>0,66</b>                         |
|                                                                                  |                     |             |             |             | 0,84        | 0,86        | 0,75                                |
| UNC84B protein                                                                   | Q2T9F7 Q2T9F7_HUMAN | 0,00        | 0,00        | 0,00        |             |             |                                     |
|                                                                                  |                     | 0,00        | 0,00        |             |             |             |                                     |
| Uncharacterized aarF domain-containing protein kinase 1 precursor                | Q86TW2 ADCK1_HUMAN  | 1,43        | 1,55        | 1,27        |             |             |                                     |
|                                                                                  |                     | 0,77        | 0,79        |             |             |             |                                     |
| Uncharacterized aarF domain-containing protein kinase 4                          | Q96D53 ADCK4_HUMAN  | 1,01        | 0,82        |             |             |             |                                     |
| Uncharacterized aarF domain-containing protein kinase 5                          | Q3MIX3 ADCK5_HUMAN  | 0,74        | 0,87        |             |             |             |                                     |
| Uncharacterized C7orf55 protein                                                  | Q96HJ9 CG055_HUMAN  | 0,00        | 0,00        | 0,00        |             |             |                                     |
| Uncharacterized metallophosphoesterase CSTP1                                     | Q9BRF8 CSTP1_HUMAN  |             |             |             | 0,86        | 0,99        | 0,92                                |
|                                                                                  |                     |             |             |             | <b>0,85</b> | 1,06        | 0,81                                |
| Uncharacterized MFS-type transporter C19orf28                                    | Q6NUT3 CS028_HUMAN  | 1,60        | 1,41        | 2,29        |             |             |                                     |
| Uncharacterized protein ACAA2 (Fragment)                                         | A8MVT9 A8MVT9_HUMAN | 1,04        | <b>0,92</b> |             |             |             |                                     |
| Uncharacterized protein AHCTF1P                                                  | A8MSG9 A8MSG9_HUMAN |             |             |             |             |             | 0,93 0,58 0,61                      |
|                                                                                  |                     |             |             |             | <b>1,47</b> | <b>1,66</b> | <b>1,50</b>                         |
| Uncharacterized protein AKAP13 (Fragment)                                        | A8MVN0 A8MVN0_HUMAN |             |             |             |             |             |                                     |
|                                                                                  |                     |             |             |             | 0,81        | 1,09        | 1,18                                |
| Uncharacterized protein ANXA6 (Fragment)                                         | A6NN80 A6NN80_HUMAN | <b>1,58</b> | <b>1,92</b> | <b>2,98</b> | <b>1,39</b> | 1,05        | <b>1,81</b>                         |
|                                                                                  |                     |             |             |             | 1,49        | 1,10        | 1,72                                |
| Uncharacterized protein ATP2A3                                                   | A8MYK9 A8MYK9_HUMAN | 1,14        | 1,33        | 1,34        |             |             |                                     |
|                                                                                  |                     | 0,89        | 1,05        |             |             |             |                                     |
| Uncharacterized protein BCAP29                                                   | A6NFI0 A6NFI0_HUMAN | 0,86        | 1,11        | 1,28        |             |             |                                     |
|                                                                                  |                     | 0,98        | 1,06        |             |             |             |                                     |
| Uncharacterized protein C10orf58 precursor                                       | Q9BRX8 CJ058_HUMAN  | <b>0,74</b> | 0,92        | 1,04        |             |             |                                     |
|                                                                                  |                     | 1,08        | 1,07        |             | <b>2,14</b> | <b>1,47</b> | 1,47                                |
| Uncharacterized protein C12orf62                                                 | Q96I36 CL062_HUMAN  | 0,68        | 0,74        | 0,50        |             |             |                                     |
| Uncharacterized protein C17orf25                                                 | Q9Y3E8 Q9Y3E8_HUMAN |             |             |             | 0,81        | 0,93        | 0,98                                |
|                                                                                  |                     |             |             |             | 0,84        | 0,99        | 0,89                                |
| Uncharacterized protein C17orf37                                                 | Q9BRT3 CQ037_HUMAN  |             |             |             |             |             |                                     |
|                                                                                  |                     |             |             |             | 0,63        | 0,96        | 0,85                                |
| Uncharacterized protein C17orf42                                                 | Q96QE5 Q96QE5_HUMAN |             |             |             |             |             |                                     |
|                                                                                  |                     | 0,89        | 1,02        |             |             |             |                                     |
| Uncharacterized protein C17orf62                                                 | Q9BQA9 CQ062_HUMAN  | 1,09        | 1,40        | 1,29        |             |             |                                     |
|                                                                                  |                     | 0,89        | 0,81        |             |             |             |                                     |
| Uncharacterized protein C17orf85                                                 | Q53F19 CQ085_HUMAN  |             |             |             |             |             | 0,62 0,23 0,14                      |
| Uncharacterized protein C17orf89                                                 | A1L188 CQ089_HUMAN  | 0,00        | 0,00        | 0,00        |             |             |                                     |
|                                                                                  |                     | 0,82        | 0,93        |             |             |             |                                     |
| Uncharacterized protein C18orf19                                                 | Q96ND0 CR019_HUMAN  | 1,18        | 1,10        | 1,05        |             |             |                                     |
|                                                                                  |                     | 0,86        | 0,86        |             |             |             |                                     |
| Uncharacterized protein C18orf32                                                 | Q8TCD1 CR032_HUMAN  | 0,00        | 0,00        | 0,00        |             |             |                                     |
| Uncharacterized protein C18orf8                                                  | Q96DM3 MIC1_HUMAN   | 0,00        | 0,00        | 0,00        |             |             |                                     |
|                                                                                  |                     | 0,87        | 1,07        |             |             |             |                                     |
| Uncharacterized protein C19orf43                                                 | Q9BQ61 CS043_HUMAN  |             |             |             |             |             | 0,95 <b>0,57</b> <b>0,18</b>        |
| Uncharacterized protein C19orf52                                                 | Q9BSF4 CS052_HUMAN  |             |             |             |             |             |                                     |
|                                                                                  |                     | 0,84        | 0,96        |             |             |             |                                     |
| Uncharacterized protein C19orf62                                                 | Q9NWW8 CS062_HUMAN  |             |             |             | 0,86        | 0,90        | 1,12                                |
|                                                                                  |                     |             |             |             | 0,63        | 0,90        | 1,10                                |
| Uncharacterized protein C1orf123                                                 | Q9NWW4 CA123_HUMAN  |             |             |             | 0,76        | 0,91        | 0,81                                |
| Uncharacterized protein C1orf135                                                 | Q9H7T9 CA135_HUMAN  | 0,00        | 0,00        |             |             |             |                                     |
| Uncharacterized protein C1orf151                                                 | A8MPU7 A8MPU7_HUMAN | <b>1,39</b> | <b>1,31</b> | <b>1,25</b> |             |             |                                     |
| Uncharacterized protein C1orf31                                                  | Q5JTJ3 CA031_HUMAN  | 0,00        | 0,00        |             |             |             |                                     |
| Uncharacterized protein C1orf77                                                  | Q9Y3Y2 CA077_HUMAN  |             |             |             |             |             | 0,84 <b>0,50</b> <b>0,31</b>        |
|                                                                                  |                     |             |             |             | 1,21        | 0,87        | 0,70                                |
| Uncharacterized protein C20orf116 precursor                                      | Q96HY6 CT116_HUMAN  | 1,04        | 1,13        | 1,27        |             |             |                                     |
|                                                                                  |                     | 1,22        | 1,09        |             |             |             | 1,14 <b>2,46</b> <b>2,22</b>        |
| Uncharacterized protein C20orf72                                                 | Q9BQP7 CT072_HUMAN  |             |             |             |             |             | <b>1,48</b> <b>3,24</b> <b>3,32</b> |
|                                                                                  |                     | 0,94        | 0,93        |             |             |             |                                     |
| Uncharacterized protein C2orf18 precursor                                        | Q8N357 CB018_HUMAN  | 0,93        | 0,92        | 0,92        |             |             |                                     |
|                                                                                  |                     | 0,86        | 0,85        |             | 0,00        | 0,00        | 0,00                                |
| Uncharacterized protein C2orf33                                                  | Q9GZY8 CB033_HUMAN  |             |             |             |             |             |                                     |
|                                                                                  |                     | 0,94        | 0,76        |             |             |             |                                     |
| Uncharacterized protein C2orf47, mitochondrial precursor                         | Q8WWC4 CB047_HUMAN  | 1,04        | 0,96        | 0,99        |             |             |                                     |
|                                                                                  |                     | <b>1,11</b> | 1,00        |             |             |             |                                     |
| Uncharacterized protein C3orf1                                                   | Q9NPL8 CC001_HUMAN  | 0,84        | <b>0,81</b> | <b>0,67</b> |             |             |                                     |
|                                                                                  |                     | 1,05        | 1,12        |             |             |             |                                     |
| Uncharacterized protein C3orf60                                                  | Q9BU61 CC060_HUMAN  | <b>0,74</b> | 0,64        | 0,78        |             |             |                                     |
|                                                                                  |                     | 0,83        | 0,92        |             |             |             |                                     |
| Uncharacterized protein C3orf68                                                  | Q7Z7K0 CC068_HUMAN  | 0,84        | <b>0,87</b> |             |             |             |                                     |
| Uncharacterized protein C4orf14                                                  | Q8NC60 CD014_HUMAN  | 1,04        |             | 0,90        |             |             |                                     |
|                                                                                  |                     | 1,06        | 1,27        |             |             |             |                                     |
| Uncharacterized protein C4orf32                                                  | Q8N8J7 CD032_HUMAN  |             |             |             |             |             |                                     |
|                                                                                  |                     | 1,01        | 1,22        |             |             |             |                                     |
| Uncharacterized protein C6orf125                                                 | Q9BRT2 CF125_HUMAN  | 0,84        | 1,06        | 0,86        |             |             |                                     |
| Uncharacterized protein C6orf203                                                 | Q9P0P8 CF203_HUMAN  |             |             |             |             |             |                                     |
|                                                                                  |                     | <b>0,85</b> | <b>0,80</b> |             |             |             |                                     |
| Uncharacterized protein C7orf24 (gamma-glutamylcyclotransferase)                 | O75223 CG024_HUMAN  |             |             |             | 0,90        | 1,08        | 0,84                                |
| Uncharacterized protein C7orf28                                                  | O95766 CG028_HUMAN  |             |             |             |             |             |                                     |
|                                                                                  |                     | 1,04        | 0,91        |             |             |             |                                     |
| Uncharacterized protein C7orf30                                                  | Q96EH3 CG030_HUMAN  |             |             |             |             |             |                                     |
|                                                                                  |                     | 1,14        | 0,91        |             |             |             |                                     |
| Uncharacterized protein C9orf105                                                 | Q8N4H5 CI105_HUMAN  | 0,92        | <b>0,80</b> | <b>0,76</b> |             |             | 0,97 <b>1,34</b> <b>1,50</b>        |
|                                                                                  |                     | 1,03        | <b>0,90</b> |             |             |             | <b>1,25</b> 0,94 <b>1,45</b>        |
| Uncharacterized protein C9orf46                                                  | Q9HBL7 CI046_HUMAN  | <b>1,24</b> | 1,01        | <b>0,77</b> |             |             | 0,99 <b>2,33</b> 1,32               |
|                                                                                  |                     | 0,96        | 1,02        |             |             |             | 0,00 0,00 0,00                      |
| Uncharacterized protein C9orf80                                                  | Q9UDY4 DNJB4_HUMAN  |             |             |             |             |             | 1,14 <b>2,46</b> <b>2,22</b>        |
| Uncharacterized protein CAMK2D                                                   | A8MVS8 A8MVS8_HUMAN | 0,00        | 0,00        | 0,00        |             |             |                                     |
| Uncharacterized protein CAPZA2                                                   | A8MW68 A8MW68_HUMAN |             |             |             |             |             |                                     |
|                                                                                  |                     | 0,90        | 1,16        |             |             |             |                                     |
| Uncharacterized protein CD97 (Fragment)                                          | A8MZ46 A8MZ46_HUMAN | <b>1,33</b> | 1,03        | 1,11        |             |             |                                     |

|                                                        |                     |                  |                  |             |                         |                |                                                                     |
|--------------------------------------------------------|---------------------|------------------|------------------|-------------|-------------------------|----------------|---------------------------------------------------------------------|
| Uncharacterized protein DDTL                           | A6NHG4 A6NHG4_HUMAN |                  |                  | 0,82        | 0,92                    | 0,91           |                                                                     |
| Uncharacterized protein DIAPH1 (Fragment)              | A6NF18 A6NF18_HUMAN |                  |                  | <b>0,82</b> | 0,94                    | 1,03           |                                                                     |
| Uncharacterized protein DKC1                           | A8MUT5 A8MUT5_HUMAN |                  |                  |             |                         |                | 0,96 <b>0,75</b> <b>0,65</b><br><b>0,33</b> <b>0,51</b> <b>0,58</b> |
| Uncharacterized protein ENSP00000249480                | A6NK07 A6NK07_HUMAN |                  |                  |             |                         |                | 0,75 <b>1,71</b> <b>1,60</b>                                        |
| Uncharacterized protein ENSP00000275524                | A6NC28 A6NC28_HUMAN |                  |                  |             |                         |                | 1,42 0,82 0,90                                                      |
| Uncharacterized protein ENSP00000281581                | P0C221 YN004_HUMAN  |                  |                  |             |                         |                | 0,82 3,42 4,57                                                      |
| Uncharacterized protein ENSP00000329640                | A6NMY6 A6NMY6_HUMAN |                  |                  | 0,00        | 0,00                    | 0,00           |                                                                     |
| Uncharacterized protein ENSP00000330892 (Fragment)     | A6NN96 A6NN96_HUMAN |                  |                  | 0,95        | 1,18                    | 1,31           |                                                                     |
| Uncharacterized protein ENSP00000331275 (Fragment)     | A6NNT3 A6NNT3_HUMAN |                  |                  | 0,00        | 0,00                    | 0,00           |                                                                     |
| Uncharacterized protein ENSP00000343430 (Fragment)     | A6NK33 A6NK33_HUMAN |                  |                  |             |                         |                | 0,82 0,32 0,29                                                      |
| Uncharacterized protein ENSP00000344759                | A6NL28 A6NL28_HUMAN |                  |                  | 0,96        | 0,98                    | 0,98           |                                                                     |
| Uncharacterized protein ENSP00000347049                | A8MSU5 A8MSU5_HUMAN |                  |                  | 0,99        | <b>0,80</b>             | <b>0,70</b>    | <b>0,86</b> <b>0,60</b> <b>0,75</b>                                 |
| Uncharacterized protein ENSP00000350479                | A6NIH1 A6NIH1_HUMAN | <b>1,36</b>      | <b>1,19</b>      |             |                         |                |                                                                     |
| Uncharacterized protein ENSP00000351543 (Fragment)     | A6NI39 A6NI39_HUMAN |                  |                  | 1,49        | 1,46                    | <b>2,18</b>    | 0,89 <b>0,76</b> 1,04                                               |
| Uncharacterized protein ENSP00000368180                | A6NLS3 A6NLS3_HUMAN |                  |                  | 0,00        | 0,00                    | <b>0,00</b>    |                                                                     |
| Uncharacterized protein ENSP00000373067                | A6NCB7 A6NCB7_HUMAN |                  |                  |             |                         |                | 1,01 <b>0,26</b> <b>0,12</b>                                        |
| Uncharacterized protein ENSP00000381615 (Fragment)     | A8MYH7 A8MYH7_HUMAN | 0,00             | 0,00             | 1,34        | 3,05                    | 2,13           |                                                                     |
| Uncharacterized protein ENSP00000382692                |                     |                  |                  |             |                         |                | 0,00 0,00 0,00                                                      |
| Uncharacterized protein ERO1L                          | A8MYW1 A8MYW1_HUMAN | 0,94             | 1,02             |             |                         |                |                                                                     |
| Uncharacterized protein FAM129A (Fragment)             | A8MYQ4 A8MYQ4_HUMAN |                  |                  | 0,86        | 0,90                    | 0,97           |                                                                     |
| Uncharacterized protein FUBP1                          | A6NL74 A6NL74_HUMAN |                  |                  | <b>1,31</b> | <b>1,60</b>             | <b>1,65</b>    | <b>1,41</b> <b>0,38</b> <b>0,39</b>                                 |
| Uncharacterized protein HCFC1                          | A6NEM2 A6NEM2_HUMAN |                  |                  |             |                         |                | 0,65 0,59 0,62                                                      |
| Uncharacterized protein HNRNPL                         | A6ND69 A6ND69_HUMAN | 0,00             | 0,00             | 0,00        | 0,00                    | 0,00           |                                                                     |
| Uncharacterized protein HVCN1 (Fragment)               | A8MQ37 A8MQ37_HUMAN |                  |                  |             |                         |                | 0,00 0,00 0,00                                                      |
| Uncharacterized protein KIAA0090 precursor             | Q8N766 K0090_HUMAN  | 0,94 <b>0,84</b> | 0,92 0,98        | <b>0,85</b> |                         |                |                                                                     |
| Uncharacterized protein KIAA0152 precursor             | Q14165 K0152_HUMAN  | 0,93 1,01        | 0,96 1,19        | 0,91        |                         |                | 1,07 <b>2,39</b> <b>4,81</b><br><b>0,72</b> <b>2,09</b> <b>2,98</b> |
| Uncharacterized protein KIAA2013 precursor             | Q8IYS2 K2013_HUMAN  | 1,04 1,07        | <b>0,62</b> 1,08 | 0,76        |                         |                |                                                                     |
| Uncharacterized protein LAIR1                          | A8MZ84 A8MZ84_HUMAN |                  |                  | 0,00        | 0,00                    | 0,00           |                                                                     |
| Uncharacterized protein LYRM7 (Fragment)               | A8MPQ9 A8MPQ9_HUMAN | 0,00 0,84        | 0,00 0,96        | 0,00        |                         |                |                                                                     |
| Uncharacterized protein MATR3                          | A8MXP9 A8MXP9_HUMAN |                  |                  |             |                         |                | <b>0,75</b> <b>0,18</b> <b>0,13</b>                                 |
| Uncharacterized protein MRPL1                          | A6NG03 A6NG03_HUMAN |                  |                  |             |                         |                |                                                                     |
| Uncharacterized protein NACAP1                         | A8MTN7 A8MTN7_HUMAN | 0,97             | 0,98             |             |                         |                |                                                                     |
| Uncharacterized protein PHACTR2 (Fragment)             | A8MZC0 A8MZC0_HUMAN |                  |                  | 0,00        | 0,00                    | 0,00           |                                                                     |
| Uncharacterized protein PICALM                         | A8MW24 A8MW24_HUMAN | <b>1,37</b>      | <b>0,69</b>      |             |                         |                |                                                                     |
| Uncharacterized protein PSME1                          | A6NJG9 A6NJG9_HUMAN |                  |                  | <b>0,84</b> | 0,99                    | <b>1,16</b>    |                                                                     |
| Uncharacterized protein SFRS2IP                        | A6NEU9 A6NEU9_HUMAN |                  |                  |             |                         |                | 1,14 <b>0,57</b> <b>0,47</b>                                        |
| Uncharacterized protein SLC4A7                         | A6NIA8 A6NIA8_HUMAN | 1,15             | 1,00             |             |                         |                |                                                                     |
| Uncharacterized protein SLC01A2                        | A6NLB2 A6NLB2_HUMAN |                  |                  |             |                         |                | 0,50 <b>6,19</b> <b>6,70</b>                                        |
| Uncharacterized protein SRI (Fragment)                 | A8MTH6 A8MTH6_HUMAN |                  |                  | 1,30        | 1,16                    | <b>1,61</b>    |                                                                     |
| Uncharacterized protein SRRM1                          | A9Z1X7 A9Z1X7_HUMAN |                  |                  |             |                         |                | 1,00 0,62 <b>0,40</b><br>1,05 <b>2,83</b> <b>2,59</b>               |
| Uncharacterized protein SUMO3                          | A8MUA9 A8MUA9_HUMAN |                  |                  |             |                         |                | 1,03 <b>0,33</b> <b>0,13</b><br><b>1,29</b> 0,93 0,53               |
| Uncharacterized protein TBCB                           | A8MVD5 A8MVD5_HUMAN |                  |                  | 1,08        | 1,02                    | 1,46           |                                                                     |
| Uncharacterized protein TUBA4A                         | A6NHY4 A6NHY4_HUMAN | 1,03             | 1,39             | 2,18        |                         |                |                                                                     |
| Uncharacterized protein TUBA4A                         | A8MUB1 A8MUB1_HUMAN | 0,00             | 0,00             | 0,00        |                         |                |                                                                     |
| Uncharacterized protein VAMP2                          | A8MWB3 A8MWB3_HUMAN | 0,90 1,05        | 0,89 <b>1,12</b> | 0,80        | <b>1,99</b>             | 1,54 1,40      | <b>1,21</b> <b>2,33</b> <b>2,43</b>                                 |
| Uncharacterized protein VAPA                           | A6NDZ0 A6NDZ0_HUMAN |                  |                  |             | <b>1,86</b> <b>1,95</b> | 1,16 1,57 1,27 |                                                                     |
| Uncharacterized protein ZNF326                         | A8MYX1 A8MYX1_HUMAN | 1,17             | 1,10             |             |                         |                | 0,83 <b>0,35</b> 0,23                                               |
| Uncharacterized serine/threonine-protein kinase Sgk494 |                     |                  |                  |             |                         |                | 0,00 0,00 0,00                                                      |
| UPF0195 protein FAM96A                                 | Q9H5X1 FA96A_HUMAN  |                  |                  | 0,00        | 0,00                    | 0,00           |                                                                     |
| UPF0197 protein C11orf10                               | P61165 CK010_HUMAN  |                  |                  |             |                         |                | 0,59 2,19 1,76                                                      |
| UPF0404 protein C11orf59                               | Q6IAA8 CK059_HUMAN  |                  |                  |             |                         |                | 0,00 0,00 0,00                                                      |
| UPF0240 protein C6orf66                                | Q9P032 CF066_HUMAN  | 0,73 1,03        | 0,71 1,01        | 0,72        |                         |                |                                                                     |
| UPF0287 protein C16orf61                               | Q9NRP2 CP061_HUMAN  | 0,00 1,11        | 0,00 1,03        | 0,00        |                         |                |                                                                     |
| UPF0317 protein C14orf159, mitochondrial precursor     | Q7Z3D6 CN159_HUMAN  | 1,00             | 1,14             | 0,84        |                         |                |                                                                     |
| UPF0318 protein FAM120A                                | Q9NZB2 F120A_HUMAN  |                  |                  |             | 0,81                    | 0,74 0,75      |                                                                     |
| UPF0368 protein Cxorf26                                | Q9BVG4 CX026_HUMAN  |                  |                  |             | 0,71                    | 0,70 0,62      |                                                                     |
| UPF0369 protein C6orf57 precursor                      | Q5VUM1 CF057_HUMAN  | 0,97             | 0,82             | 0,49        |                         |                |                                                                     |
| UPF0404 protein C11orf59                               | Q6IAA8 CK059_HUMAN  | 0,92             | <b>1,27</b>      | <b>1,44</b> |                         |                | 2,10 2,47 2,84                                                      |
| UPF0414 transmembrane protein C20orf30                 | Q96A57 CT030_HUMAN  |                  |                  |             |                         |                | 1,51 5,24 3,84                                                      |
| UPF0420 protein C16orf58                               | Q96GQ5 CP058_HUMAN  |                  |                  |             |                         |                |                                                                     |

|                                                                          |                     |                            |                            |              |                            |                            |                            |                                           |                                                          |
|--------------------------------------------------------------------------|---------------------|----------------------------|----------------------------|--------------|----------------------------|----------------------------|----------------------------|-------------------------------------------|----------------------------------------------------------|
|                                                                          |                     | 1,02                       | 0,84                       |              |                            |                            |                            |                                           |                                                          |
| UPF0465 protein C5orf33                                                  | Q4G0N4 CE033_HUMAN  | 0,64<br>0,98               | 0,65<br>0,91               | 0,88         |                            |                            |                            |                                           |                                                          |
| UPF0466 protein C22orf32, mitochondrial precursor                        | Q9H4I9 CV032_HUMAN  | <b>0,70</b>                | 0,69                       | <b>0,58</b>  |                            |                            | 0,93                       | 1,27                                      | 1,49                                                     |
| UPF0480 protein C15orf24 precursor                                       | Q9NPA0 CO024_HUMAN  | 0,99<br>0,95               | 1,09<br>1,18               | 1,16         |                            |                            | 0,85<br><b>1,35</b>        | <b>2,73</b><br><b>2,49</b>                | <b>2,59</b><br><b>3,33</b>                               |
| UPF0485 protein C1orf144                                                 | Q7Z422 CA144_HUMAN  |                            |                            |              | 0,00                       | 0,00                       | 0,00                       |                                           |                                                          |
| UPF0510 protein C19orf63 precursor                                       | Q5UCC4 CS063_HUMAN  | 0,88<br>1,03               | 0,95<br>0,93               | 0,84         |                            |                            | 0,89<br>1,00               | <b>3,55</b><br><b>2,60</b>                | <b>3,74</b><br><b>3,10</b>                               |
| UPF0511 protein C2orf56, mitochondrial precursor                         | Q7L592 CB056_HUMAN  |                            |                            |              |                            |                            |                            |                                           |                                                          |
| UPF0525 protein KIAA1754 precursor                                       | Q8IWB1 K1754_HUMAN  | 1,07<br>0,00               | 0,89<br>0,00               | 0,00         |                            |                            |                            |                                           |                                                          |
| UPF0535 membrane protein                                                 | Q6NUQ4 U535_HUMAN   | <b>0,74</b><br>0,87        | 0,71<br>0,96               | <b>0,75</b>  |                            |                            | 0,38                       | 0,83                                      | 0,80                                                     |
| UPF0554 protein C2orf43                                                  | Q9H6V9 CB043_HUMAN  |                            |                            |              |                            |                            |                            |                                           |                                                          |
| UPF0555 protein KIAA0776                                                 | Q94874 K0776_HUMAN  | 0,96<br><b>1,27</b>        | 1,48<br><b>1,24</b>        | <b>1,90</b>  |                            |                            |                            |                                           |                                                          |
| UPF0556 protein C19orf10 precursor                                       | Q969H8 CS010_HUMAN  | 1,05<br>0,99               | 1,12<br>1,08               | 0,98         |                            |                            |                            |                                           |                                                          |
| Up-regulated during skeletal muscle growth protein 5                     | Q96IX5 USMG5_HUMAN  |                            |                            |              |                            |                            |                            |                                           |                                                          |
| UQCRB protein                                                            | Q6FGD1 Q6FGD1_HUMAN | 0,92<br>1,05               | <b>0,85</b><br>1,04        | <b>0,79</b>  |                            |                            | 1,10<br><b>2,08</b>        | 0,89<br>1,16                              | <b>1,53</b><br><b>2,30</b>                               |
| UQCRH protein                                                            | Q567R0 Q567R0_HUMAN |                            |                            |              | <b>2,14</b>                | 1,28                       | 1,64                       | <b>1,24</b><br><b>1,87</b>                | 0,84<br>1,14<br><b>1,57</b><br><b>2,02</b>               |
| Uridine phosphorylase 1                                                  | Q16831 JUPP1_HUMAN  |                            |                            |              | 0,00                       | 0,00                       | 0,00                       |                                           |                                                          |
|                                                                          | Q03405 UPAR_HUMAN   |                            |                            |              |                            |                            |                            | 2,61                                      | 1,04<br>1,49                                             |
| Urokinase plasminogen activator surface receptor precursor               | Q53ZP6 Q53ZP6_HUMAN | 1,05                       | 1,05                       |              | 1,02                       | 1,05                       | 1,01                       |                                           |                                                          |
| Uroporphyrinogen decarboxylase                                           |                     |                            |                            |              |                            |                            |                            |                                           |                                                          |
| UTP--glucose-1-phosphate uridylyltransferase                             | Q16851 UGPA_HUMAN   |                            |                            |              | 0,93<br>1,09               | 1,01<br>1,04               | <b>1,17</b><br><b>1,20</b> |                                           |                                                          |
| Utrophin                                                                 | P46939 UTRO_HUMAN   | 1,12<br>1,11               | 1,37<br>1,31               | 1,51         |                            |                            |                            |                                           |                                                          |
| UV excision repair protein RAD23 homolog B                               | P54727 RD23B_HUMAN  |                            |                            |              | <b>0,87</b>                | 1,09                       | 0,95                       | 0,99                                      | <b>0,52</b><br><b>0,35</b>                               |
| UV excision repair protein RAD23 homolog B variant (Fragment)            | Q53F10 Q53F10_HUMAN |                            |                            |              | 0,67                       | <b>0,85</b>                | <b>0,74</b>                | 1,14                                      | 0,92<br>0,74                                             |
| Vacuolar ATP synthase catalytic subunit A                                | P38606 VATA_HUMAN   | <b>1,15</b><br><b>0,92</b> | <b>1,69</b><br><b>1,09</b> | <b>1,67</b>  | 1,05<br>1,30               | 0,93<br>0,90               | 0,89<br>1,08               | <b>1,69</b><br><b>0,61</b>                | <b>2,94</b><br><b>1,84</b><br><b>7,07</b><br><b>2,95</b> |
| Vacuolar ATP synthase subunit B, brain isoform                           | P21281 VATB2_HUMAN  | <b>1,19</b><br><b>0,86</b> | <b>1,55</b><br><b>1,08</b> | <b>1,54</b>  | 1,04<br><b>1,18</b>        | <b>0,85</b><br>0,97        | <b>0,86</b><br>1,16        | <b>1,57</b><br><b>0,60</b>                | <b>3,28</b><br><b>1,62</b><br><b>7,42</b><br><b>2,58</b> |
| Vacuolar protein sorting-associated protein 13D                          | Q5THJ4 VP13D_HUMAN  |                            |                            |              |                            |                            |                            |                                           |                                                          |
| Vacuolar protein sorting-associated protein 16 homolog                   | Q9H269 VPS16_HUMAN  | 0,91<br>0,00               | 1,04<br>0,00               | 0,00         |                            |                            |                            |                                           |                                                          |
| Vacuolar protein sorting-associated protein 18 homolog                   | Q9P253 VPS18_HUMAN  | 1,06<br>0,00               | 1,08<br>0,00               | 0,00         |                            |                            |                            |                                           |                                                          |
| Vacuolar protein sorting-associated protein 28 homolog                   | Q9UK41 VPS28_HUMAN  | 0,90<br>0,90               | 1,14<br>1,14               |              |                            |                            |                            |                                           |                                                          |
| Vacuolar protein sorting-associated protein 29                           | Q9UBQ0 VPS29_HUMAN  |                            |                            |              | 0,90                       | 0,94                       | 0,72                       |                                           |                                                          |
| Vacuolar protein sorting-associated protein 35                           | Q96QK1 VPS35_HUMAN  | 1,06<br>0,78               | <b>1,12</b><br>0,99        | 1,26<br>1,08 |                            |                            |                            |                                           |                                                          |
| Vacuolar protein sorting-associated protein 25                           | Q9BRG1 VPS25_HUMAN  | <b>1,51</b>                | 1,22                       |              | 0,80<br>0,81               | 1,09<br>0,99               | 0,98<br>1,42               |                                           |                                                          |
| Vacuolar proton pump subunit C 1                                         | P21283 VATC1_HUMAN  | 1,26                       | 1,05                       |              | 0,67                       | 0,94                       | 1,12                       |                                           |                                                          |
| Vacuolar proton pump subunit D                                           | Q9Y5K8 VATD_HUMAN   | <b>1,30</b><br><b>0,87</b> | <b>1,71</b><br>1,05        | <b>1,63</b>  | 1,03<br>1,08               | 0,91<br><b>0,82</b>        | 0,81<br>0,77               | <b>1,73</b><br><b>1,43</b><br><b>1,49</b> | <b>3,58</b><br><b>1,64</b><br><b>2,09</b><br><b>2,92</b> |
| Vacuolar proton pump subunit d 1                                         | P61421 VA0D1_HUMAN  | <b>1,38</b><br>0,89        | 1,62<br>0,89               | <b>1,48</b>  | 1,01<br>1,02               | 1,02<br>0,74               | 0,94<br>0,94               | <b>2,31</b><br><b>0,80</b>                | <b>2,37</b><br><b>1,34</b><br><b>4,54</b><br><b>1,84</b> |
| Vacuolar proton pump subunit F                                           | Q16864 VATF_HUMAN   | 1,02<br><b>0,79</b>        | 1,06<br>1,32               | 1,15         | 2,25                       | 1,02                       | <b>1,22</b>                | 1,12<br><b>1,73</b>                       | <b>1,96</b><br><b>2,38</b><br><b>2,65</b><br><b>2,74</b> |
| Vacuolar proton pump subunit H                                           | Q9UI12 VATH_HUMAN   | <b>1,33</b><br><b>0,80</b> | <b>1,87</b><br>1,17        | <b>1,70</b>  | 1,12                       | 0,81                       | 0,92                       | <b>1,27</b><br>0,54                       | 1,38<br>1,38<br>2,79<br>2,12                             |
| Vacuolar proton translocating ATPase 116 kDa subunit a isoform 1         | Q93050 VPP1_HUMAN   | 1,15<br>0,92               | 1,00<br>0,90               | 1,01         |                            |                            |                            |                                           |                                                          |
| Valacyclovir hydrolase precursor                                         | Q86WA6 BPHL_HUMAN   |                            |                            |              |                            |                            |                            |                                           |                                                          |
| Valosin-containing protein                                               | Q2TAI5 Q2TAI5_HUMAN | <b>0,89</b><br>1,03        | 0,86<br>1,23               |              | 0,99<br>1,05               | 1,04<br><b>1,16</b>        | <b>1,33</b><br>1,29        | 1,20<br><b>0,57</b>                       | 1,15<br><b>1,33</b><br><b>1,48</b><br><b>1,47</b>        |
| Valyl-tRNA synthetase                                                    | P26640 SYV_HUMAN    |                            |                            |              | 1,16                       | 0,88                       | 0,92                       |                                           |                                                          |
| Valyl-tRNA synthetase-like protein (Fragment)                            | Q59F11 Q59F11_HUMAN |                            |                            |              |                            |                            |                            |                                           |                                                          |
| VAMP (Vesicle-associated membrane protein)-associated protein B and C    | Q53XM7 Q53XM7_HUMAN | 0,96                       | 1,28                       |              |                            |                            |                            | 1,05<br>1,05                              | 1,94<br>1,48<br>1,35<br>1,56                             |
| WARS protein                                                             | Q502Y0 Q502Y0_HUMAN |                            |                            |              | 0,93                       | <b>1,17</b>                | 1,08                       |                                           |                                                          |
| Vasodilator-stimulated phosphoprotein                                    | P50552 VASP_HUMAN   | 1,03<br>1,39               | 1,19<br>1,41               | 2,45         | <b>0,80</b><br><b>0,75</b> | 0,95<br><b>0,80</b>        | 0,86<br>0,60               | <b>0,82</b><br><b>0,66</b>                | <b>0,57</b><br><b>0,72</b><br><b>0,35</b><br><b>0,37</b> |
| VAV1 protein                                                             | Q96D37 Q96D37_HUMAN | 0,95                       | 2,79                       | 4,49         |                            |                            |                            |                                           |                                                          |
| WD repeat and FYVE domain-containing protein 1                           | Q8IWB7 WDFY1_HUMAN  | 1,17<br><b>0,88</b>        | 0,84<br><b>0,79</b>        | 0,82         |                            |                            |                            |                                           |                                                          |
| WD repeat-containing protein 1 isoform 1 variant (Fragment)              | Q59ER5 Q59ER5_HUMAN | 1,83                       | 1,45                       | 2,17         | 1,00<br>1,04               | <b>1,24</b><br><b>1,25</b> | <b>1,12</b><br>1,14        |                                           |                                                          |
| Very long-chain specific acyl-CoA dehydrogenase, mitochondrial precursor | P49748 ACADV_HUMAN  | <b>0,88</b><br><b>0,92</b> | <b>0,87</b><br><b>0,93</b> | <b>0,80</b>  |                            |                            |                            |                                           |                                                          |
| Vesicle transport protein GOT1B                                          | Q9Y3E0 GOT1B_HUMAN  | <b>1,23</b><br>0,79        | <b>1,19</b><br>0,59        | <b>1,23</b>  |                            |                            |                            |                                           |                                                          |
| Vesicle transport protein SFT2B                                          | Q95562 SFT2B_HUMAN  | 0,83                       | 0,92                       | 2,26         |                            |                            |                            |                                           |                                                          |
| Vesicle transport through interaction with t-SNAREs homolog 1B           | Q9UEU0 VTI1B_HUMAN  | 1,18<br>1,17               | 1,05<br>1,25               | 1,10         |                            |                            |                            | 1,20<br>1,15                              | 1,48<br>1,48                                             |
| Vesicle-associated membrane protein 2                                    | Q9BUC2 Q9BUC2_HUMAN |                            |                            |              |                            |                            |                            | 1,21<br>1,14                              | 3,06<br><b>2,74</b><br><b>3,67</b><br><b>3,88</b>        |
| Vesicle-associated membrane protein 7                                    | P51809 VAMP7_HUMAN  | 0,96                       | 0,95                       | 0,79         |                            |                            |                            |                                           |                                                          |
| Vesicle-associated membrane protein 8                                    | Q9BV40 VAMP8_HUMAN  | 1,07<br>0,92               | 1,02<br>0,97               | 1,17         | 1,52<br>2,46               | 0,81<br>1,33               | 1,07<br>0,73               | 0,91<br>1,22                              | <b>2,27</b><br><b>2,91</b><br><b>2,67</b><br><b>4,20</b> |
| Vesicle-associated membrane protein-associated protein A                 | Q9P0L0 VAPA_HUMAN   | <b>0,79</b>                | 0,91                       | 1,10         |                            |                            |                            | <b>0,74</b>                               | <b>1,85</b><br><b>2,24</b>                               |
| Vesicle-fusing ATPase                                                    | P46459 NSF_HUMAN    | <b>1,08</b><br><b>1,24</b> | 0,97<br>1,07               | <b>1,29</b>  | 1,09                       | 1,32                       | 0,87                       |                                           |                                                          |
| Vesicle-trafficking protein SEC22b                                       | O75396 SC22B_HUMAN  | 1,07<br>1,02               | 1,17<br>1,26               | <b>1,37</b>  | <b>1,75</b><br><b>1,85</b> | 1,14<br>1,09               | 1,12<br>0,87               | <b>1,19</b><br><b>1,77</b>                | <b>3,41</b><br><b>3,41</b><br><b>3,18</b><br><b>3,87</b> |
| Vesicular integral-membrane protein VIP36 precursor                      | Q12907 LMAN2_HUMAN  | <b>1,29</b>                | 1,10                       | 1,11         |                            |                            |                            | 1,14<br>0,93                              | <b>4,37</b><br><b>4,44</b><br><b>6,28</b><br><b>5,51</b> |
| Vimentin                                                                 | P08670 VIME_HUMAN   | <b>1,13</b><br><b>1,12</b> | <b>2,65</b><br><b>2,23</b> | <b>5,85</b>  | <b>1,94</b><br>2,20        | <b>2,61</b><br>3,05        | <b>2,33</b><br>2,72        | <b>0,92</b><br>0,45                       | <b>0,39</b><br>0,29<br><b>0,26</b><br>0,23               |
| Vinculin                                                                 | P18206 VINC_HUMAN   | 0,00<br>1,31               | 0,00<br>1,20               | 0,00         | <b>0,85</b><br>0,80        | 0,97<br>1,01               | 1,01<br><b>0,90</b>        |                                           |                                                          |

|                                                                      |                     |                     |                     |             |                     |                     |                     |                     |                            |                            |
|----------------------------------------------------------------------|---------------------|---------------------|---------------------|-------------|---------------------|---------------------|---------------------|---------------------|----------------------------|----------------------------|
| Wiskott-Aldrich syndrome protein                                     | P42768 WASP_HUMAN   |                     |                     |             | 1,05<br><b>0,70</b> | 0,79<br><b>0,77</b> | 0,58<br><b>0,70</b> |                     |                            |                            |
| Wiskott-Aldrich syndrome protein family member 2                     | Q9Y6W5 WASF2_HUMAN  |                     |                     |             | 0,77<br><b>0,69</b> | 0,71<br>0,81        | 0,76<br>0,76        | 0,95<br><b>0,82</b> | 1,17<br><b>1,53</b>        | 1,13<br><b>1,50</b>        |
|                                                                      | Q8N0U8 VKORL_HUMAN  |                     |                     |             |                     |                     |                     |                     |                            |                            |
| Vitamin K epoxide reductase complex subunit 1-like protein 1         |                     | 0,85                | 0,92                |             |                     |                     |                     |                     |                            |                            |
| Wolframin                                                            | O76024 WFS1_HUMAN   | 0,93<br>0,93        | 1,08<br>1,05        | 0,98        | 0,00                | 0,00                | 0,00                |                     |                            |                            |
| Voltage-dependent anion-selective channel protein 1                  | P21796 VDAC1_HUMAN  | 1,08<br>0,99        | 0,95<br>1,00        | <b>0,85</b> | 1,79<br>2,14        | 1,17<br>1,26        | 1,13<br>2,20        | 0,91<br><b>1,40</b> | <b>1,45</b><br>1,01        | <b>1,33</b><br><b>1,35</b> |
| Voltage-dependent anion-selective channel protein 2                  | P45880 VDAC2_HUMAN  | <b>1,16</b><br>0,99 | 1,05<br>1,06        | 0,92        |                     |                     |                     | 1,55<br><b>0,38</b> | 1,78<br><b>0,87</b>        | <b>2,61</b><br>1,00        |
| Voltage-dependent anion-selective channel protein 3                  | Q9Y277 VDAC3_HUMAN  | <b>1,37</b><br>1,04 | 1,16<br><b>1,26</b> | 0,96        |                     |                     |                     | <b>1,76</b><br>0,90 | <b>1,53</b><br>0,76        | <b>3,05</b><br>0,88        |
| Voltage-gated calcium channel beta 2 subunit splice variant CavB2cN2 | Q6TME2 Q6TME2_HUMAN |                     |                     |             |                     |                     |                     | 0,00                | 0,00                       | 0,00                       |
| Voltage-gated potassium channel subunit beta-2                       | Q13303 KCAB2_HUMAN  |                     |                     |             | 1,04                | 1,04                | 0,86                |                     |                            |                            |
| V-set and immunoglobulin domain-containing protein 4 precursor       | Q9Y279 VSG4_HUMAN   | 0,00<br>1,22        | 0,00<br>0,59        | 0,00        |                     |                     |                     |                     |                            |                            |
| WW domain-binding protein 11                                         | Q9Y2W2 WBP11_HUMAN  |                     |                     |             |                     |                     |                     | 0,88<br>1,11        | <b>0,35</b><br><b>0,63</b> | <b>0,23</b><br>0,68        |
| WW domain-binding protein 2                                          | Q969T9 WBP2_HUMAN   |                     |                     |             | 0,56<br>0,92        | 0,51<br>1,49        | 0,38<br>0,95        |                     |                            |                            |
| WW domain-binding protein 7                                          | Q9UMN6 WBP7_HUMAN   |                     |                     |             |                     |                     |                     |                     |                            |                            |
| Xaa-Pro aminopeptidase 1                                             | Q9NQW7 XPP1_HUMAN   | 0,96                | 1,02                |             |                     |                     |                     |                     |                            |                            |
| Xaa-Pro dipeptidase                                                  | P12955 PEPD_HUMAN   |                     |                     |             | <b>0,75</b><br>0,91 | 0,98<br>1,04        | 0,77<br>0,85        |                     |                            |                            |
| XTP3-transactivated gene A protein                                   | Q9H773 XTP3A_HUMAN  |                     |                     |             |                     |                     |                     |                     |                            |                            |
| XTP3-transactivated gene B protein precursor                         | Q96DZ1 XTP3B_HUMAN  | 0,88<br>0,83        | 0,88<br>1,02        | 1,14        |                     |                     |                     |                     |                            |                            |
| YBX1 protein (Fragment)                                              | Q6PKI6 Q6PKI6_HUMAN | 1,02                | <b>1,84</b>         | <b>2,61</b> |                     |                     |                     |                     |                            |                            |
| YLP motif-containing protein 1                                       | P49750 YLPM1_HUMAN  |                     |                     |             | 0,00                | 0,00                | 0,00                |                     |                            |                            |
| YTH domain family protein 3                                          | Q7Z739 YTHD3_HUMAN  |                     |                     |             |                     |                     |                     | 0,91<br>1,04        | <b>0,26</b><br><b>0,56</b> | <b>0,21</b><br>0,48        |
| Zinc finger CCCH domain-containing protein 11A                       | O75152 ZC11A_HUMAN  |                     |                     |             |                     |                     |                     | 0,00                | 0,00                       | 0,00                       |
| Zinc finger CCCH domain-containing protein 13                        | Q5T200 ZC3HD_HUMAN  |                     |                     |             |                     |                     |                     | 0,55<br>0,84        | 0,18<br><b>0,54</b>        | 0,10<br>0,46               |
| Zinc finger CCCH domain-containing protein 15                        | Q8WU90 ZC3HF_HUMAN  |                     |                     |             | 1,02                | 0,99                | 1,12                |                     |                            |                            |
| Zinc finger CCCH domain-containing protein 18                        | Q86VM9 ZC18_HUMAN   |                     |                     |             | 0,86                | 0,60                | 0,53                | 0,49                | 0,74                       | 0,86                       |
| Zinc finger CCCH domain-containing protein 4                         | Q9UPT8 ZC3H4_HUMAN  |                     |                     |             |                     |                     |                     | <b>0,83</b><br>0,97 | <b>0,47</b><br>0,81        | <b>0,27</b><br>0,64        |
| Zinc finger CCCH type antiviral protein 1                            | Q7Z2W4 ZCC2_HUMAN   |                     |                     |             |                     |                     |                     | 1,28                | 0,80                       | 0,86                       |
| Zinc finger matrin-type protein 2                                    | Q96NC0 ZMAT2_HUMAN  |                     |                     |             | 0,00                | 0,00                | 0,00                |                     |                            |                            |
| Zinc finger protein 207 variant (Fragment)                           | Q59G94 Q59G94_HUMAN |                     |                     |             |                     |                     |                     | 0,76<br>1,09        | 0,66<br><b>0,37</b>        | 0,55<br><b>0,32</b>        |
| Zinc finger protein 326                                              | Q5BKZ1 ZN326_HUMAN  |                     |                     |             | 1,14                | 1,23                | 1,27                |                     |                            |                            |
| Zinc finger protein 638                                              | Q14966 ZN638_HUMAN  |                     |                     |             | 0,92                | 0,60                | 0,70                |                     |                            |                            |
| Zinc finger protein 787                                              | Q6DD87 ZN787_HUMAN  |                     |                     |             |                     |                     |                     | 1,05                | 0,71                       | 0,90                       |
| Zinc finger protein 791                                              | Q3KP31 ZN791_HUMAN  |                     |                     |             |                     |                     |                     | 0,00                | 0,00                       | 0,00                       |
| Zinc finger protein 9                                                | Q5U0E9 Q5U0E9_HUMAN |                     |                     |             | 1,47                | 0,98                | 0,75                |                     |                            |                            |
| Zinc finger protein KIAA1802                                         | Q96JM3 ZN828_HUMAN  |                     |                     |             |                     |                     |                     | 0,93                | 0,96                       | 0,63                       |
| Zinc finger Ran-binding domain-containing protein 2                  | Q95218 ZRAB2_HUMAN  |                     |                     |             |                     |                     |                     | 0,00                | 0,00                       | 0,00                       |
| Zinc finger RNA-binding protein                                      | Q96KR1 ZFR_HUMAN    |                     |                     |             |                     |                     |                     | <b>1,79</b><br>2,94 | <b>1,85</b><br><b>2,95</b> | <b>0,49</b><br>2,12        |
| Zinc phosphodiesterase ELAC protein 2                                | Q9BQ52 RNZ2_HUMAN   |                     |                     |             |                     |                     |                     | 0,00                | 0,00                       | 0,00                       |
| Zinc transporter 1                                                   | Q9Y6M5 ZNT1_HUMAN   | 0,97<br>1,53        | 0,88<br>0,94        |             |                     |                     |                     |                     |                            |                            |
| Zinc transporter 5                                                   | Q8TAD4 ZNT5_HUMAN   | 1,06<br>1,63        | 1,09<br>1,56        |             |                     |                     |                     |                     |                            |                            |
| Zinc transporter 7                                                   | Q8NEW0 ZNT7_HUMAN   | 0,97<br>0,93        | 0,63<br><b>0,78</b> | 0,70        |                     |                     |                     |                     |                            |                            |
| Zinc transporter SLC39A7                                             | Q92504 S39A7_HUMAN  | 0,96<br>1,05        | 1,08<br>1,01        | 0,96        |                     |                     |                     | 1,14<br>0,00        | <b>2,02</b><br>0,00        | <b>3,47</b><br>0,00        |
| Zinc transporter ZIP11                                               | Q8N1S5 S39AB_HUMAN  | 0,89<br>1,41        | 0,89<br>1,50        | 1,97        |                     |                     |                     |                     |                            |                            |
| Zinc-binding alcohol dehydrogenase domain-containing protein 2       | Q8N4Q0 ZADH2_HUMAN  |                     |                     |             |                     |                     |                     |                     |                            |                            |
| Zyxin                                                                | Q15942 ZYX_HUMAN    | 1,04                | 1,00                |             | <b>0,87</b><br>0,71 | 0,99<br><b>0,82</b> | <b>0,90</b><br>0,67 | 0,99<br><b>1,35</b> | 0,60<br>0,79               | 0,62<br><b>0,64</b>        |

**bold** = statistically significant quantitation result (p<0,05)  
0,00 = protein identified but no quantitation result

## B. Secretome

| Protein name                                                     | SwissProt access   | secretome                  |                            |                             |
|------------------------------------------------------------------|--------------------|----------------------------|----------------------------|-----------------------------|
|                                                                  |                    | 6h (ITRAQ 115:114)         | 9h (ITRAQ 116:114)         | 12h (ITRAQ 117:114)         |
| 10 kDa heat shock protein, mitochondrial                         | P61604 CH10_HUMAN  | <b>1,87</b><br>4,76        | <b>4,06</b><br>3,31        | <b>4,96</b><br>8,84         |
| 14-3-3 protein beta/alpha                                        | P31946 1433B_HUMAN | 1,80<br><b>2,91</b>        | <b>2,88</b><br><b>3,12</b> | <b>3,76</b><br><b>6,98</b>  |
| 14-3-3 protein epsilon                                           | P62258 1433E_HUMAN | 1,86<br><b>5,03</b>        | <b>2,48</b><br><b>4,33</b> | <b>3,12</b><br><b>9,64</b>  |
| 14-3-3 protein eta                                               | Q04917 1433F_HUMAN | <b>1,69</b><br>3,52        | <b>3,07</b><br><b>4,52</b> | <b>3,90</b><br><b>11,49</b> |
| 14-3-3 protein gamma                                             | P61981 1433G_HUMAN | <b>1,48</b><br>2,66        | <b>2,15</b><br><b>3,67</b> | <b>2,95</b><br>5,21         |
| 14-3-3 protein theta                                             | P27348 1433T_HUMAN | 2,58<br>19,96              | 4,34<br>15,18              | <b>4,89</b><br>33,98        |
| 14-3-3 protein zeta/delta                                        | P63104 1433Z_HUMAN | <b>1,52</b><br><b>2,24</b> | <b>2,39</b><br><b>2,37</b> | <b>3,28</b><br><b>6,08</b>  |
| 1-phosphatidylinositol-4,5-bisphosphate phosphodiesterase beta-2 | Q00722 PLCB2_HUMAN | 0,00<br>0,00               | 0,00<br>0,00               | 12,78<br>8,18               |
| 26S proteasome non-ATPase regulatory subunit 13                  | Q9UNM6 PSD13_HUMAN | <b>1,79</b>                | <b>3,01</b>                | <b>3,43</b>                 |
| 28 kDa heat- and acid-stable phosphoprotein                      | Q13442 HAP28_HUMAN | 2,40<br>0,00               | 6,35<br>0,00               | 8,32<br>9,77                |
| 40S ribosomal protein S10                                        | P46783 RS10_HUMAN  | 1,96                       | <b>5,50</b>                | <b>7,71</b>                 |

|                                                               |                    |             |              |              |
|---------------------------------------------------------------|--------------------|-------------|--------------|--------------|
| 40S ribosomal protein S15                                     | P62841 RS15_HUMAN  | 3,71        | 8,83         | 14,52        |
| 40S ribosomal protein S16                                     | P62249 RS16_HUMAN  | 0,00        | 7,08         | 31,52        |
| 40S ribosomal protein S17                                     | P08708 RS17_HUMAN  | 2,02        | 3,16         | <b>5,41</b>  |
| 40S ribosomal protein S19                                     | P39019 RS19_HUMAN  |             | <b>10,42</b> | <b>12,54</b> |
| 40S ribosomal protein S20                                     | P60866 RS20_HUMAN  | 1,31        | <b>6,96</b>  | <b>10,96</b> |
| 40S ribosomal protein S23                                     | P62266 RS23_HUMAN  | 2,24        | 4,47         | 20,35        |
| 40S ribosomal protein S28                                     | P62857 RS28_HUMAN  | 2,54        | <b>3,87</b>  | <b>4,48</b>  |
| 40S ribosomal protein S3                                      | P23396 RS3_HUMAN   | 1,61        | 2,35         | 6,90         |
| 40S ribosomal protein S6                                      | P62753 RS6_HUMAN   | 4,08        | 6,88         | 7,35         |
| 40S ribosomal protein S7                                      | P62081 RS7_HUMAN   | 0,00        | 0,00         | 5,38         |
| 40S ribosomal protein SA                                      | P08865 RSSA_HUMAN  | 2,49        | 6,32         | 7,87         |
| 45 kDa calcium-binding protein                                | Q9BRK5 CAB45_HUMAN | <b>6,29</b> | <b>6,40</b>  | <b>21,24</b> |
| 60S acidic ribosomal protein P0                               | P05388 RLA0_HUMAN  | 2,26        | 3,05         | 3,60         |
| 60S acidic ribosomal protein P2                               | P05387 RLA2_HUMAN  | 0,00        | 0,00         | 7,35         |
| 60S ribosomal protein L10a                                    | P62906 RL10A_HUMAN | 3,12        | 10,59        | 12,36        |
| 60S ribosomal protein L11                                     | P62913 RL11_HUMAN  | 0,00        | 0,00         | 26,68        |
| 60S ribosomal protein L12                                     | P30050 RL12_HUMAN  | 1,53        | 4,18         | <b>5,10</b>  |
| 60S ribosomal protein L23                                     | P62629 RL23_HUMAN  |             |              |              |
| 60S ribosomal protein L23a                                    | P62750 RL23A_HUMAN | 2,21        | 3,14         | <b>11,80</b> |
| 60S ribosomal protein L5                                      | P46777 RL5_HUMAN   | 1,24        | <b>2,01</b>  | <b>2,38</b>  |
| 60S ribosomal protein L6                                      | Q02878 RL6_HUMAN   | 1,54        | 2,43         | <b>3,56</b>  |
| 60S ribosomal protein L7a                                     | P62424 RL7A_HUMAN  | <b>1,29</b> | <b>2,90</b>  | <b>3,89</b>  |
| 6-phosphogluconate dehydrogenase, decarboxylating             | P52209 6PGD_HUMAN  | 2,24        | 6,31         | 11,42        |
| 78 kDa glucose-regulated protein                              | P11021 GRP78_HUMAN | <b>3,89</b> | 4,11         | <b>9,71</b>  |
| Acid ceramidase                                               | Q13510 ASAH1_HUMAN | 1,65        | <b>3,08</b>  | <b>3,54</b>  |
| Acidic leucine-rich nuclear phosphoprotein 32 family member A | P39687 AN32A_HUMAN | 1,99        | 2,20         | <b>5,03</b>  |
| Acidic leucine-rich nuclear phosphoprotein 32 family member B | Q92688 AN32B_HUMAN | 1,92        | <b>3,58</b>  | 3,58         |
| Actin, cytoplasmic 1                                          | P60709 ACTB_HUMAN  | 2,19        | <b>3,93</b>  | <b>3,76</b>  |
| Actin-related protein 2                                       | P61160 ARP2_HUMAN  | 0,00        | 0,00         | 15,76        |
| Actin-related protein 2/3 complex subunit 1B                  | O15143 ARC1B_HUMAN | 5,08        | 9,32         | 9,59         |
| Actin-related protein 2/3 complex subunit 2                   | O15144 ARPC2_HUMAN | 1,86        | 1,64         | 3,17         |
| Actin-related protein 2/3 complex subunit 3                   | O15145 ARPC3_HUMAN | <b>3,46</b> | <b>8,52</b>  | <b>12,07</b> |
| Actin-related protein 2/3 complex subunit 4                   | P59998 ARPC4_HUMAN | 4,21        | 5,88         | 20,20        |
| Actin-related protein 2/3 complex subunit 5                   | O15511 ARPC5_HUMAN | <b>2,76</b> | <b>8,90</b>  | <b>9,50</b>  |
| Acylamino-acid-releasing enzyme                               | P13798 ACPH_HUMAN  | 4,82        | 8,48         | <b>21,97</b> |
| Acyl-CoA-binding protein                                      | P07108 ACBP_HUMAN  | 4,50        | <b>8,14</b>  | <b>8,87</b>  |
| Adenosine deaminase CECR1                                     | Q9NZK5 CECR1_HUMAN | 4,06        | 4,30         | 14,31        |
| Adenosylhomocysteinase                                        | P23526 SAHH_HUMAN  | 0,00        | 5,55         | 4,57         |
| Adenylate kinase 2, mitochondrial                             | P54819 KAD2_HUMAN  | 0,00        | 0,00         | 8,76         |
| Adenylosuccinate synthetase isozyme 2                         | P30520 PURA2_HUMAN | <b>1,59</b> | <b>2,24</b>  | <b>2,59</b>  |
| Adenyllyl cyclase-associated protein 1                        | Q01518 CAP1_HUMAN  | <b>2,18</b> | <b>2,26</b>  | <b>7,09</b>  |
| ADP-ribosylation factor 3                                     | P61204 ARF3_HUMAN  | <b>1,74</b> | <b>2,77</b>  | <b>2,01</b>  |
| Afamin                                                        | P43652 AFAM_HUMAN  | <b>2,51</b> | <b>2,31</b>  | <b>3,47</b>  |
| Alcohol dehydrogenase [NADP+]                                 | P14550 AK1A1_HUMAN | 2,98        | <b>5,04</b>  | <b>6,60</b>  |
| Alcohol dehydrogenase class-3                                 | P11766 ADHX_HUMAN  | 3,71        | 3,97         | <b>14,66</b> |
| Aldose 1-epimerase                                            | Q96C23 GALM_HUMAN  | 1,96        | 3,13         | 4,46         |
| Aldose reductase                                              | P15121 ALDR_HUMAN  | <b>2,64</b> | <b>2,85</b>  | <b>7,96</b>  |
| Allograft inflammatory factor 1                               | P55008 AIF1_HUMAN  | 2,08        | 3,03         | <b>3,78</b>  |
| Alpha-1-antitrypsin                                           | P01009 A1AT_HUMAN  | 3,77        | 3,69         | 8,89         |
| Alpha-1B-glycoprotein                                         | P04217 A1BG_HUMAN  | <b>1,81</b> | <b>3,15</b>  | <b>3,85</b>  |
| Alpha-2-HS-glycoprotein                                       | P02765 FETUA_HUMAN | 0,00        | 0,00         | 0,00         |
| Alpha-2-macroglobulin                                         | P01023 A2MG_HUMAN  | 2,14        | 3,66         | <b>3,79</b>  |
| Alpha-actinin-1                                               | P12814 ACTN1_HUMAN | <b>3,76</b> | 4,40         | <b>11,04</b> |
| Alpha-actinin-4                                               | O43707 ACTN4_HUMAN | <b>2,24</b> | <b>3,18</b>  | <b>3,69</b>  |
| Alpha-endosulfine                                             | O43768 ENSA_HUMAN  | <b>2,56</b> | <b>2,59</b>  | <b>7,31</b>  |
| Alpha-enolase                                                 | P06733 ENOA_HUMAN  | <b>1,93</b> | <b>2,87</b>  | <b>3,51</b>  |
| Aminopeptidase N                                              | P15144 AMPN_HUMAN  | <b>3,01</b> | <b>3,49</b>  | <b>7,70</b>  |
| Amyloid beta A4 protein OS=Pan troglodytes                    | Q5IS80 A4_PANTR    | <b>1,67</b> | <b>3,16</b>  | <b>3,85</b>  |
| Amyloid-like protein 2                                        | Q06481 APLP2_HUMAN | <b>4,31</b> | <b>4,66</b>  | <b>11,46</b> |
|                                                               |                    | 2,38        | 3,19         | 3,33         |
|                                                               |                    | <b>2,90</b> | <b>3,57</b>  | <b>7,26</b>  |
|                                                               |                    | <b>2,66</b> | <b>4,80</b>  | <b>5,88</b>  |
|                                                               |                    | <b>3,23</b> | <b>3,65</b>  | <b>9,09</b>  |
|                                                               |                    | <b>1,90</b> | <b>2,96</b>  | <b>2,82</b>  |
|                                                               |                    | <b>3,08</b> | <b>3,23</b>  | <b>6,92</b>  |
|                                                               |                    | 1,29        | 1,93         | 2,34         |
|                                                               |                    | 2,93        | 1,84         | 8,17         |
|                                                               |                    | <b>1,48</b> | <b>3,26</b>  | <b>4,69</b>  |
|                                                               |                    | <b>2,91</b> | <b>3,45</b>  | <b>13,76</b> |
|                                                               |                    | <b>0,66</b> | 0,71         | 0,67         |
|                                                               |                    | 1,16        | 1,21         | <b>1,78</b>  |
|                                                               |                    | 2,66        | <b>3,28</b>  | <b>3,71</b>  |
|                                                               |                    | 2,89        | 5,41         | 8,00         |
|                                                               |                    | 0,00        | 7,27         | <b>15,34</b> |
|                                                               |                    | 2,30        | <b>3,53</b>  | <b>3,93</b>  |
|                                                               |                    | <b>2,60</b> | <b>4,30</b>  | <b>5,76</b>  |
|                                                               |                    | <b>3,80</b> | <b>3,78</b>  | <b>10,98</b> |
|                                                               |                    | 4,07        | 7,85         | <b>10,35</b> |
|                                                               |                    |             |              |              |
|                                                               |                    | <b>3,64</b> | <b>3,37</b>  | <b>5,19</b>  |
|                                                               |                    | 1,88        | 3,36         | 3,22         |
|                                                               |                    | 2,52        | 2,42         | <b>6,73</b>  |
|                                                               |                    | <b>2,86</b> | <b>4,47</b>  | <b>4,75</b>  |
|                                                               |                    | 2,29        | 1,82         | 6,37         |
|                                                               |                    | 1,44        | 1,54         | 1,95         |
|                                                               |                    | 1,17        | 2,07         | 7,16         |
|                                                               |                    | <b>2,02</b> | 2,05         | <b>6,22</b>  |
|                                                               |                    | <b>2,47</b> | <b>6,42</b>  | <b>10,41</b> |
|                                                               |                    | <b>3,13</b> | <b>4,27</b>  | <b>15,49</b> |
|                                                               |                    | <b>0,74</b> | 0,93         | 0,94         |
|                                                               |                    | <b>1,41</b> | 1,25         | <b>1,70</b>  |
|                                                               |                    | 2,42        | 3,31         | 3,75         |
|                                                               |                    | 0,00        | 0,00         | 9,81         |
|                                                               |                    | 1,53        | <b>2,12</b>  | 1,74         |
|                                                               |                    | <b>4,25</b> | <b>4,05</b>  | <b>4,59</b>  |
|                                                               |                    | <b>0,59</b> | <b>0,56</b>  | <b>0,49</b>  |
|                                                               |                    | <b>1,37</b> | 0,83         | <b>1,32</b>  |
|                                                               |                    | <b>1,66</b> | <b>2,05</b>  | <b>2,29</b>  |
|                                                               |                    | <b>2,07</b> | <b>2,12</b>  | <b>4,49</b>  |
|                                                               |                    | <b>1,49</b> | <b>2,33</b>  | <b>2,51</b>  |
|                                                               |                    | <b>2,28</b> | <b>2,50</b>  | <b>6,17</b>  |
|                                                               |                    | 3,40        | 7,96         | <b>8,69</b>  |
|                                                               |                    | 0,00        | 0,00         | 0,00         |
|                                                               |                    | <b>1,48</b> | <b>2,47</b>  | <b>3,01</b>  |
|                                                               |                    | <b>2,27</b> | <b>2,53</b>  | <b>6,96</b>  |
|                                                               |                    | 1,18        | <b>1,91</b>  | <b>2,18</b>  |
|                                                               |                    | 3,80        | 4,65         | <b>6,33</b>  |
|                                                               |                    | 1,26        | 1,57         | <b>1,70</b>  |
|                                                               |                    | 2,88        | 2,04         | <b>3,95</b>  |
|                                                               |                    | 0,96        | 1,13         | 1,45         |

|                                                               |                    |             |              |              |
|---------------------------------------------------------------|--------------------|-------------|--------------|--------------|
|                                                               |                    | 1,56        | 1,28         | 2,29         |
| Annexin A1                                                    | P04083 ANXA1_HUMAN | <b>1,52</b> | <b>1,65</b>  | <b>2,06</b>  |
|                                                               |                    | <b>2,87</b> | <b>3,48</b>  | <b>5,88</b>  |
| Annexin A11                                                   | P50995 ANX11_HUMAN | <b>1,47</b> | <b>2,57</b>  | <b>3,59</b>  |
|                                                               |                    | 1,81        | 3,26         | <b>12,84</b> |
| Annexin A2                                                    | P07355 ANXA2_HUMAN | 1,05        | 1,09         | <b>1,47</b>  |
|                                                               |                    | <b>1,91</b> | 1,37         | <b>2,66</b>  |
| Annexin A4                                                    | P09525 ANXA4_HUMAN | 1,17        | 2,00         | <b>2,68</b>  |
| Annexin A5                                                    | P08758 ANXA5_HUMAN | 1,09        | <b>0,59</b>  | 0,94         |
|                                                               |                    | <b>2,21</b> | <b>1,32</b>  | <b>2,52</b>  |
| Annexin A6                                                    | P08133 ANXA6_HUMAN | 1,35        | <b>1,98</b>  | <b>2,43</b>  |
|                                                               |                    | 3,49        | 4,92         | <b>12,25</b> |
| AP-2 complex subunit alpha-1                                  | O95782 AP2A1_HUMAN | 1,37        | 2,13         | 3,15         |
|                                                               |                    |             |              | 7,06         |
| Apolipoprotein A-II                                           | P02652 APOA2_HUMAN | <b>4,80</b> | <b>6,04</b>  | <b>5,64</b>  |
|                                                               |                    | 6,07        | 5,48         | 8,89         |
| Apolipoprotein B-100 receptor                                 | Q0VD83 AB48R_HUMAN | <b>1,86</b> | <b>3,49</b>  | <b>4,53</b>  |
|                                                               |                    | <b>3,69</b> | 3,26         | <b>7,90</b>  |
| Apolipoprotein C-I                                            | P02654 APOC1_HUMAN | 1,22        | 0,77         | 0,90         |
|                                                               |                    | <b>2,58</b> | <b>2,99</b>  | <b>6,08</b>  |
| Apolipoprotein C-II                                           | P02655 APOC2_HUMAN |             |              |              |
|                                                               |                    | 5,65        | 6,58         | <b>9,39</b>  |
| Apolipoprotein E                                              | P02649 APOE_HUMAN  | 0,85        | <b>1,28</b>  | <b>1,41</b>  |
|                                                               |                    | <b>2,74</b> | <b>2,03</b>  | <b>3,41</b>  |
| Apoptotic chromatin condensation inducer in the nucleus       | Q9UKV3 ACINU_HUMAN | 1,36        | <b>2,22</b>  | <b>3,48</b>  |
| Astrocytic phosphoprotein PEA-15                              | Q15121 PEA15_HUMAN | 1,78        | <b>3,00</b>  | <b>4,77</b>  |
|                                                               |                    | <b>3,86</b> | 4,12         | <b>10,07</b> |
| ATPase inhibitor, mitochondrial                               | Q9UII2 ATIF1_HUMAN | 3,32        | 6,70         | 6,55         |
|                                                               |                    | 9,28        | 0,00         | 9,50         |
| ATP-citrate synthase                                          | P53396 ACLY_HUMAN  | 1,63        | <b>2,73</b>  | <b>2,51</b>  |
|                                                               |                    | 0,00        | 0,00         | 7,26         |
| ATP-dependent DNA helicase 2 subunit 1                        | P12956 KU70_HUMAN  | <b>1,71</b> | <b>2,73</b>  | <b>3,91</b>  |
|                                                               |                    | 2,27        | 1,80         | 5,18         |
| Band 4.1-like protein 3                                       | Q9Y2J2 E41L3_HUMAN | 2,51        | 4,32         | 5,26         |
|                                                               |                    | 6,38        | 4,75         | <b>9,23</b>  |
| Basic leucine zipper and W2 domain-containing protein 1       | Q7L1Q6 BZW1_HUMAN  | <b>2,28</b> | <b>4,64</b>  | <b>6,62</b>  |
|                                                               |                    | 0,00        | 0,00         | <b>15,50</b> |
| Basigin                                                       | P35613 BASI_HUMAN  | 0,97        | 2,01         | 3,91         |
|                                                               |                    | 2,77        | 0,00         | 6,98         |
| B-cell receptor-associated protein 31                         | P51572 BAP31_HUMAN | 3,55        | <b>9,70</b>  | <b>17,11</b> |
|                                                               |                    | 2,35        | 3,14         | <b>27,77</b> |
| Beta-2-glycoprotein 1                                         | P02749 APOH_HUMAN  | <b>1,67</b> | <b>2,40</b>  | <b>2,25</b>  |
|                                                               |                    | <b>2,08</b> | <b>2,13</b>  | <b>3,05</b>  |
| Beta-2-microglobulin                                          | P61769 B2MG_HUMAN  | <b>0,67</b> | 0,99         | 1,07         |
|                                                               |                    | <b>1,84</b> | <b>1,65</b>  | <b>2,40</b>  |
| Beta-hexosaminidase subunit beta                              | P07686 HEXB_HUMAN  | 1,16        | 1,60         | <b>2,44</b>  |
|                                                               |                    | <b>2,57</b> | <b>2,93</b>  | <b>8,39</b>  |
| Beta-lactamase-like protein 2                                 | Q53H82 LACB2_HUMAN | 1,56        | 2,70         | 2,79         |
|                                                               |                    | 3,05        | 2,92         | 7,65         |
| Biliverdin reductase A                                        | P53004 BIEA_HUMAN  | 2,08        | 3,24         | 3,55         |
|                                                               |                    | 1,80        | 2,49         | 7,05         |
| BolA-like protein 2                                           | Q9H3K6 BOLA2_HUMAN | 25,64       | 31,47        | 22,00        |
|                                                               |                    | 40,37       | 27,05        | 41,20        |
| Brain acid soluble protein 1                                  | P80723 BASP1_HUMAN | 1,27        | <b>2,38</b>  | <b>4,40</b>  |
|                                                               |                    | 2,07        | 2,00         | <b>5,92</b>  |
| Bridging integrator 2                                         | Q9UBW5 BIN2_HUMAN  | 1,63        | <b>3,82</b>  | <b>5,18</b>  |
|                                                               |                    | 3,66        | 5,34         | 16,48        |
| Cadherin-11                                                   | P55287 CAD11_HUMAN | 11,37       | <b>15,60</b> | <b>8,91</b>  |
|                                                               |                    | 6,99        | 6,88         | <b>11,25</b> |
| Calcineurin subunit B type 1                                  | P63098 CANB1_HUMAN | 2,41        | 5,01         | 6,50         |
|                                                               |                    | 5,95        | 6,63         | 17,10        |
|                                                               | Q9BRF8 CPPED_HUMAN | 1,51        | 2,37         | 2,41         |
|                                                               |                    | 0,00        | 0,00         | 14,51        |
| Calcineurin-like phosphoesterase domain-containing protein 1  |                    |             |              |              |
| Calcium-binding protein 39                                    | Q9Y376 CAB39_HUMAN | <b>1,46</b> | <b>2,47</b>  | <b>3,61</b>  |
|                                                               |                    | <b>2,99</b> | <b>3,82</b>  | <b>8,14</b>  |
| Calcyclin-binding protein                                     | Q9HB71 CYBP_HUMAN  | <b>1,93</b> | <b>3,08</b>  | <b>3,86</b>  |
|                                                               |                    | <b>3,05</b> | 3,28         | <b>8,15</b>  |
| Calmodulin                                                    | P62158 CALM_HUMAN  | <b>1,55</b> | 0,97         | 1,38         |
|                                                               |                    | <b>2,67</b> | <b>2,69</b>  | <b>8,40</b>  |
| Calpastatin                                                   | P20810 ICAL_HUMAN  | 1,22        | 2,41         | 4,37         |
|                                                               |                    | <b>2,97</b> | 2,62         | <b>7,85</b>  |
| Calreticulin                                                  | P27797 CALR_HUMAN  | <b>1,59</b> | 2,37         | 2,01         |
|                                                               |                    | <b>1,81</b> | <b>1,78</b>  | <b>2,33</b>  |
| Calumenin                                                     | O43852 CALU_HUMAN  | 3,04        | 5,30         | 6,02         |
|                                                               |                    | <b>4,05</b> | <b>3,23</b>  | <b>7,63</b>  |
| cAMP-dependent protein kinase catalytic subunit beta          | P22694 KAPCB_HUMAN | 1,60        | <b>2,78</b>  | 3,68         |
|                                                               |                    | 0,00        | 0,00         | 13,50        |
|                                                               | P10644 KAP0_HUMAN  | <b>1,89</b> | 3,15         | 4,51         |
|                                                               |                    |             | 4,26         | <b>7,94</b>  |
| cAMP-dependent protein kinase type I-alpha regulatory subunit |                    |             |              |              |
| Caprin-1                                                      | Q14444 CAPR1_HUMAN | 1,62        | <b>2,87</b>  | <b>3,80</b>  |
|                                                               |                    | 5,65        | 3,65         | <b>10,02</b> |
| Capz-interacting protein                                      | Q6JBY9 CPZIP_HUMAN | <b>1,81</b> | <b>3,54</b>  | <b>5,27</b>  |
|                                                               |                    | 2,59        | 2,07         | <b>7,99</b>  |
| Carbonic anhydrase 2                                          | P00918 CAH2_HUMAN  | 1,35        | 2,16         | <b>2,92</b>  |
|                                                               |                    | <b>2,47</b> | <b>2,30</b>  | <b>6,90</b>  |
| Carbonyl reductase [NADPH] 1                                  | P16152 CBR1_HUMAN  | <b>2,35</b> | <b>3,50</b>  | <b>3,33</b>  |
|                                                               |                    | 4,33        | 0,00         | <b>10,90</b> |
| Carboxypeptidase M                                            | P14384 CBPM_HUMAN  | 1,13        | 1,59         | 1,91         |
|                                                               |                    | 1,64        | <b>2,15</b>  | <b>4,36</b>  |
| Catalase                                                      | P04040 CATA_HUMAN  | 1,97        | 2,67         | 2,32         |
|                                                               |                    | 2,34        | 2,28         | <b>5,08</b>  |
| Cathepsin B                                                   | P07858 CATB_HUMAN  | <b>0,69</b> | <b>0,64</b>  | 0,62         |
|                                                               |                    | <b>1,54</b> | <b>1,60</b>  | <b>2,24</b>  |
| Cathepsin D                                                   | P07339 CATD_HUMAN  | 0,85        | 0,82         | 1,10         |
|                                                               |                    | <b>2,40</b> | <b>2,77</b>  | <b>6,73</b>  |
| Cathepsin H                                                   | P09668 CATH_HUMAN  | <b>1,84</b> | <b>2,41</b>  | <b>3,17</b>  |
|                                                               |                    | 2,54        | 3,06         | 8,15         |
| Cathepsin S                                                   | P25774 CATS_HUMAN  | 1,15        | 1,23         | 1,46         |
|                                                               |                    | <b>1,92</b> | <b>2,00</b>  | <b>5,07</b>  |
| Cathepsin Z                                                   | Q9UBR2 CATZ_HUMAN  | 1,10        | 1,11         | 1,49         |
|                                                               |                    | 1,92        | <b>1,80</b>  | <b>4,54</b>  |
| Cation-independent mannose-6-phosphate receptor               | P11717 MPRI_HUMAN  | 1,52        | <b>3,34</b>  | <b>3,20</b>  |
|                                                               |                    | 2,18        | 3,33         | 7,58         |
| C-C motif chemokine 24                                        | O00175 CCL24_HUMAN | 1,67        | 2,48         | 2,36         |
|                                                               |                    | 2,72        | 2,58         | 4,61         |
| C-C motif chemokine 8                                         | P80075 CCL8_HUMAN  | <b>7,66</b> | <b>7,25</b>  | 13,45        |
| CD166 antigen                                                 | Q13740 CD166_HUMAN | 1,44        | <b>2,26</b>  | <b>2,83</b>  |
|                                                               |                    | 1,75        | 2,42         | <b>6,22</b>  |
| CD44 antigen                                                  | P16070 CD44_HUMAN  | 1,48        | <b>3,01</b>  | <b>4,85</b>  |
|                                                               |                    | <b>2,86</b> | <b>3,45</b>  | <b>9,49</b>  |
| CD63 antigen                                                  | P08962 CD63_HUMAN  | 1,32        | 2,40         | 2,92         |
|                                                               |                    | 2,16        | <b>2,98</b>  | <b>10,82</b> |
| CD9 antigen                                                   | P21926 CD9_HUMAN   | 1,47        | 1,43         | 2,15         |
|                                                               |                    | 1,87        | 2,13         | 8,95         |
| Cell division control protein 42 homolog                      | P60953 CDC42_HUMAN | 2,34        | 4,75         | 5,35         |
|                                                               |                    | 1,74        | 3,37         | 17,06        |

|                                                                                                                   |                    |             |              |              |
|-------------------------------------------------------------------------------------------------------------------|--------------------|-------------|--------------|--------------|
| Cellular nucleic acid-binding protein                                                                             | P62633 CNBP_HUMAN  | 2,51        | <b>4,54</b>  | <b>6,75</b>  |
|                                                                                                                   |                    | 3,81        | 4,43         | 12,65        |
| Cellular retinoic acid-binding protein 2                                                                          | P29373 RABP2_HUMAN | <b>1,62</b> | <b>2,40</b>  | <b>3,39</b>  |
|                                                                                                                   |                    | 3,78        | 4,03         | <b>14,60</b> |
| Charged multivesicular body protein 4a                                                                            | Q9BY43 CHM4A_HUMAN | 1,28        | 2,89         | 5,65         |
|                                                                                                                   |                    | 2,20        | 1,89         | 7,10         |
| Chitotriosidase-1                                                                                                 | Q13231 CHIT1_HUMAN | 0,69        | 0,78         | 0,74         |
|                                                                                                                   |                    | <b>1,52</b> | 1,25         | 1,21         |
| Chloride intracellular channel protein 1                                                                          | O00299 CLIC1_HUMAN | <b>2,31</b> | <b>3,87</b>  | <b>4,70</b>  |
|                                                                                                                   |                    | <b>3,06</b> | <b>3,56</b>  | <b>8,37</b>  |
| Chloride intracellular channel protein 4                                                                          | Q9Y696 CLIC4_HUMAN | 2,00        | 3,31         | 4,15         |
|                                                                                                                   |                    | 3,87        | 3,00         | <b>11,16</b> |
| Chromobox protein homolog 3                                                                                       | Q13185 CBX3_HUMAN  | 1,23        | 2,93         | 4,00         |
|                                                                                                                   |                    | 4,16        | 3,58         | <b>11,18</b> |
| Citrate synthase, mitochondrial                                                                                   | O75390 CISY_HUMAN  | <b>2,04</b> | <b>3,22</b>  | <b>2,96</b>  |
|                                                                                                                   |                    | 2,49        | 2,76         | <b>4,97</b>  |
| Clathrin heavy chain 1                                                                                            | Q00610 CLH1_HUMAN  | <b>2,05</b> | <b>2,58</b>  | <b>2,95</b>  |
|                                                                                                                   |                    | <b>2,88</b> | <b>2,73</b>  | <b>7,78</b>  |
| Clathrin light chain A                                                                                            | P09496 CLCA_HUMAN  | 2,83        | <b>4,79</b>  | <b>6,10</b>  |
|                                                                                                                   |                    | 3,08        | 2,66         | 6,47         |
| Clathrin light chain B                                                                                            | P09497 CLCB_HUMAN  | <b>2,52</b> | <b>4,53</b>  | <b>6,08</b>  |
|                                                                                                                   |                    | 0,00        | 0,00         | 0,00         |
| Cleavage and polyadenylation specificity factor subunit 5                                                         | O43809 CPSF5_HUMAN | 2,47        | 3,95         | 6,34         |
|                                                                                                                   |                    | 3,07        | 2,48         | 6,76         |
| Coactosin-like protein                                                                                            | Q14019 COTL1_HUMAN | 1,23        | <b>2,01</b>  | <b>2,64</b>  |
|                                                                                                                   |                    | <b>2,42</b> | <b>2,89</b>  | <b>7,80</b>  |
| Coagulation factor XIII A chain                                                                                   | P00488 F13A_HUMAN  | <b>2,02</b> | <b>2,35</b>  | <b>2,81</b>  |
| Coatomer subunit delta                                                                                            | P48444 COPD_HUMAN  | 1,84        | <b>3,26</b>  | <b>3,81</b>  |
|                                                                                                                   |                    | 2,52        | 2,73         | <b>7,25</b>  |
| Cofilin-1                                                                                                         | P23528 COF1_HUMAN  | <b>1,90</b> | <b>3,98</b>  | <b>6,10</b>  |
|                                                                                                                   |                    | <b>2,86</b> | <b>4,76</b>  | <b>15,67</b> |
| Cold shock domain-containing protein E1                                                                           | O75534 CSD1_HUMAN  | 2,08        | <b>3,18</b>  | 3,00         |
| Collagen alpha-1(I) chain                                                                                         | P02452 CO1A1_HUMAN | 4,52        | 6,09         | 3,75         |
|                                                                                                                   |                    | <b>5,52</b> | 5,81         | <b>7,57</b>  |
| Collagen alpha-1(V) chain                                                                                         | P20908 CO5A1_HUMAN | 14,90       | <b>19,99</b> | <b>12,86</b> |
|                                                                                                                   |                    | 26,97       | 19,93        | 31,20        |
| Collagen alpha-1(XI) chain                                                                                        | P12107 COBA1_HUMAN | 5,22        | 7,87         | 8,98         |
|                                                                                                                   |                    | 11,00       | 8,63         | 13,78        |
| Complement C1q subcomponent subunit B                                                                             | P02746 C1QB_HUMAN  | 0,00        | 0,00         | 0,00         |
|                                                                                                                   |                    | 2,31        | 0,00         | <b>2,66</b>  |
| Coronin-1A                                                                                                        | P31146 COR1A_HUMAN | <b>2,42</b> | <b>3,86</b>  | <b>4,47</b>  |
|                                                                                                                   |                    | 2,56        | <b>2,10</b>  | <b>9,25</b>  |
| Coronin-1B                                                                                                        | Q9BR76 COR1B_HUMAN | <b>2,28</b> | <b>3,90</b>  | <b>4,26</b>  |
|                                                                                                                   |                    | 4,97        | 3,02         | 11,84        |
| Coronin-1C                                                                                                        | Q9ULV4 COR1C_HUMAN | <b>2,08</b> | <b>3,30</b>  | <b>5,03</b>  |
|                                                                                                                   |                    | <b>3,56</b> | <b>3,58</b>  | <b>8,83</b>  |
| Cystatin-A                                                                                                        | P01040 CYTA_HUMAN  | 2,21        | <b>3,84</b>  | <b>5,04</b>  |
|                                                                                                                   |                    | 2,18        | 1,89         | 7,28         |
| Cystatin-B                                                                                                        | P04080 CYTB_HUMAN  | 1,45        | <b>3,05</b>  | <b>5,01</b>  |
|                                                                                                                   |                    | <b>2,93</b> | <b>3,08</b>  | <b>10,39</b> |
| Cystatin-C                                                                                                        | P01034 CYTC_HUMAN  | 0,88        | 1,00         | 0,91         |
|                                                                                                                   |                    | 1,99        | 1,37         | 2,12         |
| Cysteine and glycine-rich protein 1                                                                               | P21291 CSR1_HUMAN  | <b>2,09</b> | <b>2,90</b>  | <b>3,78</b>  |
|                                                                                                                   |                    | 0,00        | 0,00         | 0,00         |
| Cysteine-rich protein 1                                                                                           | P50238 CRIP1_HUMAN | 4,14        | 7,98         | <b>6,58</b>  |
| Cytochrome b-245 light chain                                                                                      | P13498 CY24A_HUMAN | 1,23        | 2,09         | <b>2,95</b>  |
|                                                                                                                   |                    | 2,41        | 2,92         | 8,48         |
| Cytochrome c                                                                                                      | P99999 CYC_HUMAN   | <b>1,93</b> | <b>4,31</b>  | <b>7,25</b>  |
|                                                                                                                   |                    | 3,29        | <b>3,32</b>  | <b>9,74</b>  |
| Cytoplasmic dynein 1 intermediate chain 2                                                                         | Q13409 DC1I2_HUMAN | 2,25        | 2,72         | 3,36         |
|                                                                                                                   |                    | 6,73        | 6,18         | 12,39        |
| Cytosol aminopeptidase                                                                                            | P28838 AMPL_HUMAN  | 2,02        | <b>3,47</b>  | <b>3,77</b>  |
|                                                                                                                   |                    | <b>2,49</b> | 3,52         | <b>11,04</b> |
| Cytosolic non-specific dipeptidase                                                                                | Q96KP4 CNDP2_HUMAN | 1,99        | <b>3,63</b>  | <b>4,38</b>  |
|                                                                                                                   |                    | 1,90        | 2,27         | <b>6,24</b>  |
| Deoxyribonucleoside 5'-monophosphate N-glycosidase                                                                | O43598 RCL_HUMAN   | 6,87        | 5,65         | <b>14,67</b> |
| Dextrin                                                                                                           | P60981 DEST_HUMAN  | <b>7,97</b> | <b>10,30</b> | <b>10,46</b> |
|                                                                                                                   |                    | 8,00        | <b>6,60</b>  | <b>17,52</b> |
| Dihydropolypyllysine-residue succinyltransferase component of 2-oxoglutarate dehydrogenase complex, mitochondrial | P36957 ODO2_HUMAN  | 2,54        | 3,79         | 3,30         |
|                                                                                                                   |                    | 3,35        | 4,47         | 5,22         |
| Dihydropyrimidinase-related protein 2                                                                             | Q16555 DPYL2_HUMAN | <b>1,54</b> | <b>2,49</b>  | <b>2,50</b>  |
|                                                                                                                   |                    | 0,00        | 0,00         | 4,87         |
| Dipeptidyl-peptidase 1                                                                                            | P53634 CATC_HUMAN  | 2,22        | 2,64         | 2,70         |
|                                                                                                                   |                    | 3,85        | 4,10         | 9,58         |
| Dipeptidyl-peptidase 3                                                                                            | Q9NY33 DPP3_HUMAN  | 1,40        | <b>2,10</b>  | <b>2,38</b>  |
|                                                                                                                   |                    | 2,42        | 1,74         | <b>4,96</b>  |
| Disabled homolog 2                                                                                                | P98082 DAB2_HUMAN  | <b>2,49</b> | 4,15         | <b>6,13</b>  |
|                                                                                                                   |                    | <b>3,67</b> | <b>2,98</b>  | 6,82         |
| DNA-(apurinic or apyrimidinic site) lyase                                                                         | P27695 APEX1_HUMAN | 1,46        | 2,48         | <b>2,69</b>  |
|                                                                                                                   |                    | <b>2,79</b> | <b>2,39</b>  | <b>5,29</b>  |
| DnaJ homolog subfamily B member 1                                                                                 | P25685 DNJB1_HUMAN | <b>2,65</b> | <b>4,37</b>  | <b>5,33</b>  |
|                                                                                                                   |                    | 4,55        | 4,60         | 9,71         |
| DnaJ homolog subfamily C member 8                                                                                 | O75937 DNJC8_HUMAN | 2,02        | <b>3,40</b>  | 4,52         |
|                                                                                                                   |                    | 4,22        | 4,41         | <b>12,73</b> |
| Drebrin-like protein                                                                                              | Q9UJU6 DBNL_HUMAN  | 2,06        | <b>3,85</b>  | <b>4,34</b>  |
|                                                                                                                   |                    | <b>4,22</b> | <b>3,95</b>  | <b>11,00</b> |
| Dual specificity mitogen-activated protein kinase kinase 1                                                        | Q02750 MP2K1_HUMAN | <b>2,04</b> | <b>4,54</b>  | <b>5,71</b>  |
|                                                                                                                   |                    | 0,00        | 0,00         | 44,13        |
| Dynactin subunit 2                                                                                                | Q13561 DCTN2_HUMAN | 1,30        | 2,63         | <b>3,93</b>  |
|                                                                                                                   |                    | 3,71        | 6,30         | 9,37         |
| Dystroglycan                                                                                                      | Q14118 DAG1_HUMAN  | 2,02        | 2,72         | 2,84         |
|                                                                                                                   |                    | 1,97        | 1,86         | 4,30         |
| EF-hand domain-containing protein D2                                                                              | Q96C19 EFHD2_HUMAN | <b>2,07</b> | <b>4,51</b>  | <b>6,78</b>  |
|                                                                                                                   |                    | <b>4,61</b> | <b>5,35</b>  | <b>17,49</b> |
| Elongation factor 1-alpha 1                                                                                       | P68104 EF1A1_HUMAN | 2,13        | <b>4,46</b>  | <b>4,63</b>  |
| Elongation factor 1-beta                                                                                          | P24534 EF1B_HUMAN  | <b>2,42</b> | <b>4,77</b>  | <b>6,34</b>  |
|                                                                                                                   |                    | <b>5,67</b> | <b>6,29</b>  | <b>15,94</b> |
| Elongation factor 1-gamma                                                                                         | P26641 EF1G_HUMAN  | 2,92        | <b>4,91</b>  | <b>5,00</b>  |
|                                                                                                                   |                    | <b>3,78</b> | <b>4,32</b>  | <b>12,36</b> |
| Elongation factor 2                                                                                               | P13639 EF2_HUMAN   | <b>2,67</b> | <b>4,11</b>  | <b>4,12</b>  |
|                                                                                                                   |                    | <b>3,24</b> | <b>3,55</b>  | <b>11,85</b> |
| EMILIN-2                                                                                                          | Q9BXX0 EMIL2_HUMAN | <b>0,60</b> | <b>0,57</b>  | 0,65         |
|                                                                                                                   |                    | 1,16        | 1,24         | 1,53         |
| Ena/VASP-like protein                                                                                             | Q9UI08 EVL_HUMAN   | 1,18        | <b>2,29</b>  | <b>3,31</b>  |
|                                                                                                                   |                    | 0,00        | 0,00         | 0,00         |
| Endoplasmic reticulum protein ERp29                                                                               | P30040 ERP29_HUMAN | <b>2,80</b> | <b>3,60</b>  | 4,39         |
|                                                                                                                   |                    | <b>3,06</b> | <b>3,12</b>  | <b>6,75</b>  |
| Endoplasmin                                                                                                       | P14625 ENPL_HUMAN  | <b>1,89</b> | <b>3,05</b>  | <b>2,37</b>  |
|                                                                                                                   |                    | <b>2,76</b> | <b>2,98</b>  | <b>3,99</b>  |
| Endothelial differentiation-related factor 1                                                                      | O60869 EDF1_HUMAN  | 2,74        | 3,80         | <b>6,02</b>  |
|                                                                                                                   |                    | 0,00        | 0,00         | 0,00         |
| Epididymal secretory protein E1                                                                                   | P61916 NPC2_HUMAN  | <b>1,76</b> | <b>2,70</b>  | <b>3,16</b>  |
|                                                                                                                   |                    | <b>3,12</b> | <b>3,30</b>  | <b>8,52</b>  |
| ES1 protein homolog, mitochondrial                                                                                | P30042 ES1_HUMAN   | 1,17        | 2,37         | <b>2,60</b>  |

|                                                                                |                    |              |              |              |
|--------------------------------------------------------------------------------|--------------------|--------------|--------------|--------------|
|                                                                                |                    | 4,13         | 2,96         | 5,79         |
| Eukaryotic initiation factor 4A-I                                              | P60842 IF4A1_HUMAN | <b>2,39</b>  | <b>4,02</b>  | <b>4,88</b>  |
|                                                                                |                    | 6,43         | <b>5,45</b>  | <b>7,69</b>  |
| Eukaryotic translation initiation factor 1A, X-chromosomal                     | P47813 IF1AX_HUMAN | 1,90         | 3,83         | 5,01         |
|                                                                                |                    | 0,00         | 0,00         | 10,45        |
| Eukaryotic translation initiation factor 2 subunit 2-like protein<br>PE=1 SV=1 | A6NK07 IF2BL_HUMAN | 1,90         | 3,52         | <b>4,97</b>  |
|                                                                                |                    | 2,07         | 1,56         | 4,35         |
| Eukaryotic translation initiation factor 2A                                    | Q9BY44 EIF2A_HUMAN | 1,99         | 3,52         | 9,03         |
|                                                                                |                    | 0,00         | 0,00         | 8,23         |
| Eukaryotic translation initiation factor 3 subunit A                           | Q14152 EIF3A_HUMAN | <b>1,82</b>  | <b>3,25</b>  | <b>3,89</b>  |
|                                                                                |                    | 2,78         | 0,00         | <b>6,19</b>  |
| Eukaryotic translation initiation factor 3 subunit C                           | Q99613 EIF3C_HUMAN | 1,34         | 2,33         | <b>3,39</b>  |
|                                                                                |                    | 2,66         | 2,80         | 8,33         |
| Eukaryotic translation initiation factor 3 subunit J                           | O75822 EIF3J_HUMAN | 2,40         | <b>5,18</b>  | <b>7,67</b>  |
|                                                                                |                    | 3,83         | 4,25         | 13,04        |
| Eukaryotic translation initiation factor 4 gamma 1                             | Q04637 IF4G1_HUMAN | <b>1,70</b>  | <b>3,50</b>  | <b>4,30</b>  |
|                                                                                |                    | 3,32         | 2,41         | <b>9,95</b>  |
| Eukaryotic translation initiation factor 4B                                    | P23588 IF4B_HUMAN  | 1,98         | <b>3,64</b>  | <b>4,63</b>  |
|                                                                                |                    | 0,00         | 0,00         | <b>7,44</b>  |
| Eukaryotic translation initiation factor 4H                                    | Q15056 IF4H_HUMAN  | 2,17         | 3,63         | 4,19         |
|                                                                                |                    | 2,73         | <b>2,35</b>  | <b>7,44</b>  |
| Eukaryotic translation initiation factor 5                                     | P55010 IF5_HUMAN   | <b>1,98</b>  | <b>4,13</b>  | <b>5,56</b>  |
|                                                                                |                    | 3,95         | 0,00         | 6,71         |
| Eukaryotic translation initiation factor 5A-1                                  | P63241 IF5A1_HUMAN | 1,64         | <b>3,25</b>  | <b>4,29</b>  |
|                                                                                |                    | <b>2,74</b>  | <b>3,03</b>  | <b>9,44</b>  |
| Eukaryotic translation initiation factor 5B                                    | O60841 IF2P_HUMAN  | 1,55         | <b>2,48</b>  | <b>5,17</b>  |
| Extracellular matrix protein 1                                                 | Q16610 ECM1_HUMAN  | 0,76         | 1,04         | 1,19         |
|                                                                                |                    | <b>2,23</b>  | 1,73         | <b>2,31</b>  |
| Ezrin                                                                          | P15311 EZRI_HUMAN  | <b>1,59</b>  | <b>2,89</b>  | <b>3,49</b>  |
|                                                                                |                    | <b>3,29</b>  | <b>3,57</b>  | <b>9,87</b>  |
| F-actin-capping protein subunit alpha-1                                        | P52907 CAZA1_HUMAN | 3,31         | 3,79         | 4,15         |
|                                                                                |                    | 4,10         | 6,28         | 16,91        |
| F-actin-capping protein subunit beta                                           | P47756 CAPZB_HUMAN | <b>2,15</b>  | <b>3,29</b>  | <b>3,74</b>  |
|                                                                                |                    | 5,85         | 5,86         | 9,84         |
| Far upstream element-binding protein 1                                         | Q96AE4 FUBP1_HUMAN | <b>2,06</b>  | <b>4,18</b>  | <b>5,07</b>  |
|                                                                                |                    | 4,74         | 5,30         | 15,60        |
| Far upstream element-binding protein 2                                         | Q92945 FUBP2_HUMAN | <b>1,95</b>  | <b>3,75</b>  | <b>4,70</b>  |
|                                                                                |                    | 6,24         | <b>7,45</b>  | <b>19,95</b> |
| Farnesyl pyrophosphate synthetase                                              | P14324 FPPS_HUMAN  | <b>1,33</b>  | <b>2,23</b>  | <b>2,48</b>  |
|                                                                                |                    | 1,79         | 2,42         | <b>7,30</b>  |
| Fascin                                                                         | Q16658 FSCN1_HUMAN | <b>1,45</b>  | <b>2,17</b>  | <b>2,23</b>  |
|                                                                                |                    | 3,51         | 3,82         | 9,71         |
| Fatty acid synthase                                                            | P49327 FAS_HUMAN   | <b>2,34</b>  | <b>3,29</b>  | <b>3,25</b>  |
|                                                                                |                    | 0,00         | 0,00         | 8,40         |
| Fatty acid-binding protein, adipocyte                                          | P15090 FABP4_HUMAN | 2,06         | 2,56         | 2,87         |
|                                                                                |                    | 3,66         | <b>3,70</b>  | 10,01        |
| Fatty acid-binding protein, epidermal                                          | Q01469 FABP5_HUMAN | 2,14         | <b>3,20</b>  | <b>4,29</b>  |
|                                                                                |                    | <b>3,07</b>  | <b>3,28</b>  | <b>11,71</b> |
| Fatty acid-binding protein, heart                                              | P05413 FABPH_HUMAN | 2,68         | 3,59         | 4,52         |
|                                                                                |                    | <b>5,99</b>  | <b>5,47</b>  | <b>14,12</b> |
| Fermitin family homolog 3                                                      | Q86UX7 URP2_HUMAN  | <b>2,03</b>  | <b>3,02</b>  | <b>3,73</b>  |
|                                                                                |                    | <b>4,27</b>  | <b>4,47</b>  | <b>12,95</b> |
| Ferritin heavy chain                                                           | P02794 FRIH_HUMAN  | 1,96         | 3,44         | 3,67         |
|                                                                                |                    | <b>2,75</b>  | <b>2,56</b>  | <b>6,16</b>  |
| Ferritin light chain                                                           | P02792 FRIL_HUMAN  | 1,63         | <b>2,87</b>  | <b>3,76</b>  |
|                                                                                |                    | <b>1,95</b>  | <b>2,35</b>  | <b>5,54</b>  |
| Fibrobleukin                                                                   | Q14314 FGL2_HUMAN  | <b>1,60</b>  | <b>1,91</b>  | <b>2,27</b>  |
|                                                                                |                    | <b>3,04</b>  | <b>2,55</b>  | <b>6,29</b>  |
| Fibronectin                                                                    | P02751 FINC_HUMAN  | <b>13,33</b> | <b>10,90</b> | <b>7,58</b>  |
|                                                                                |                    | <b>15,53</b> | <b>12,03</b> | <b>17,89</b> |
| Filamin-A                                                                      | P21333 FLNA_HUMAN  | <b>1,46</b>  | <b>2,15</b>  | <b>2,41</b>  |
|                                                                                |                    | <b>2,66</b>  | <b>2,42</b>  | <b>6,60</b>  |
| Filamin-B                                                                      | O75369 FLNB_HUMAN  | 3,49         | 4,21         | <b>5,60</b>  |
| FK506-binding protein 3                                                        | Q00688 FKBP3_HUMAN | <b>2,05</b>  | <b>4,48</b>  | <b>7,44</b>  |
|                                                                                |                    | <b>6,42</b>  | <b>6,30</b>  | <b>18,59</b> |
| FK506-binding protein 4                                                        | Q02790 FKBP4_HUMAN | 1,98         | <b>3,75</b>  | <b>4,12</b>  |
| FK506-binding protein 5                                                        | Q13451 FKBP5_HUMAN | 2,14         | <b>4,19</b>  | <b>5,41</b>  |
|                                                                                |                    | <b>4,99</b>  | 7,50         | <b>15,83</b> |
| Follistatin-related protein 1                                                  | Q12841 FSTL1_HUMAN | <b>5,72</b>  | <b>9,84</b>  | <b>7,32</b>  |
|                                                                                |                    | <b>14,69</b> | 11,90        | <b>22,88</b> |
| Fructose-1,6-bisphosphatase 1                                                  | P09467 F16P1_HUMAN | 1,31         | <b>2,10</b>  | <b>2,33</b>  |
|                                                                                |                    | <b>2,08</b>  | <b>2,17</b>  | <b>5,71</b>  |
| Fructose-bisphosphate aldolase A                                               | P04075 ALDOA_HUMAN | 1,55         | 2,22         | 2,35         |
|                                                                                |                    | <b>2,21</b>  | <b>2,54</b>  | <b>6,67</b>  |
| Fumarate hydratase, mitochondrial                                              | P07954 FUMH_HUMAN  | 1,78         | <b>2,40</b>  | <b>2,63</b>  |
|                                                                                |                    | 2,28         | 0,00         | <b>4,69</b>  |
| Galectin-1                                                                     | P09382 LEG1_HUMAN  | 1,50         | 3,63         | 6,19         |
|                                                                                |                    | <b>2,69</b>  | <b>3,78</b>  | <b>11,51</b> |
| Galectin-3                                                                     | P17931 LEG3_HUMAN  | <b>1,37</b>  | <b>2,16</b>  | <b>2,67</b>  |
|                                                                                |                    | <b>3,17</b>  | <b>2,90</b>  | <b>7,13</b>  |
| Galectin-3-binding protein                                                     | Q08380 LG3BP_HUMAN | 0,67         | 0,75         | <b>0,66</b>  |
| Gamma-aminobutyric acid receptor-associated protein-like 2                     | P60520 GBRL2_HUMAN | 2,56         | 5,90         | <b>5,93</b>  |
|                                                                                |                    | 1,85         | 1,90         | 6,84         |
| Gamma-interferon-inducible lysosomal thiol reductase                           | P13284 GILT_HUMAN  | 1,96         | 3,21         | 2,11         |
|                                                                                |                    | 8,88         | 4,91         | 14,20        |
| Ganglioside GM2 activator                                                      | P17900 SAP3_HUMAN  | 0,70         | 0,99         | 1,30         |
|                                                                                |                    | <b>2,33</b>  | <b>2,21</b>  | <b>4,15</b>  |
| Gelsolin                                                                       | P06396 GELS_HUMAN  | <b>1,39</b>  | <b>2,35</b>  | <b>2,90</b>  |
|                                                                                |                    | <b>2,27</b>  | <b>2,46</b>  | <b>7,03</b>  |
| Glia maturation factor gamma                                                   | O60234 GMFG_HUMAN  | <b>1,93</b>  | <b>3,52</b>  | <b>4,81</b>  |
|                                                                                |                    | <b>3,53</b>  | <b>4,12</b>  | <b>11,84</b> |
| Glucose-6-phosphate 1-dehydrogenase                                            | P11413 G6PD_HUMAN  | <b>3,03</b>  | <b>6,23</b>  | <b>7,05</b>  |
|                                                                                |                    | <b>3,51</b>  | <b>3,91</b>  | <b>12,92</b> |
| Glucose-6-phosphate isomerase                                                  | P06744 G6PI_HUMAN  | <b>1,42</b>  | <b>2,02</b>  | <b>2,39</b>  |
|                                                                                |                    | <b>2,12</b>  | <b>2,38</b>  | <b>5,78</b>  |
| Glucosidase 2 subunit beta                                                     | P14314 GLU2B_HUMAN | 1,44         | <b>2,96</b>  | <b>2,71</b>  |
| Glutaminy-peptide cyclotransferase                                             | Q16769 QPCT_HUMAN  | 0,90         | 0,95         | 0,84         |
|                                                                                |                    | <b>1,47</b>  | 1,25         | 1,35         |
| Glutaredoxin-1                                                                 | P35754 GLRX1_HUMAN | 0,00         | 0,00         | 0,00         |
|                                                                                |                    | 3,28         | 4,41         | <b>14,45</b> |
| Glutathione reductase, mitochondrial                                           | P00390 GSHR_HUMAN  | 1,34         | <b>1,76</b>  | <b>1,95</b>  |
|                                                                                |                    | 2,06         | <b>1,71</b>  | <b>5,95</b>  |
| Glutathione S-transferase omega-1                                              | P78417 GSTO1_HUMAN | <b>1,57</b>  | <b>2,76</b>  | <b>3,65</b>  |
|                                                                                |                    | <b>2,54</b>  | <b>2,93</b>  | <b>8,30</b>  |
| Glutathione S-transferase P                                                    | P09211 GSTP1_HUMAN | <b>1,58</b>  | <b>2,74</b>  | <b>3,57</b>  |
|                                                                                |                    | 2,99         | 3,25         | 8,37         |
| Glutathione synthetase                                                         | P48637 GSHB_HUMAN  | 1,29         | <b>2,19</b>  | <b>2,07</b>  |
| Glyceraldehyde-3-phosphate dehydrogenase                                       | P04406 G3P_HUMAN   | 1,21         | <b>3,11</b>  | <b>4,82</b>  |
|                                                                                |                    | <b>3,27</b>  | <b>4,61</b>  | <b>16,96</b> |
| Glycogen phosphorylase, liver form                                             | P06737 PYGL_HUMAN  | <b>1,93</b>  | <b>3,36</b>  | <b>3,04</b>  |
|                                                                                |                    | 2,80         | 2,80         | 8,02         |
| Glycylpeptide N-tetradecenoyltransferase 1                                     | P30419 NMT1_HUMAN  | 1,40         | 1,90         | <b>3,36</b>  |
|                                                                                |                    | 2,72         | 2,72         | 8,08         |

|                                                                  |                    |              |              |              |
|------------------------------------------------------------------|--------------------|--------------|--------------|--------------|
| Glycyl-tRNA synthetase                                           | P41250 SYG_HUMAN   | 4,96         | 3,79         | <b>13,78</b> |
| Glyoxalase domain-containing protein 4                           | Q9HC38 GLOD4_HUMAN | 1,93         | 2,91         | 3,57         |
|                                                                  |                    | 3,43         | 3,74         | <b>10,25</b> |
| G-protein coupled receptor 120                                   | Q5NUL3 GP120_HUMAN | 29,47        | 28,32        | 18,90        |
|                                                                  |                    | 51,57        | 33,67        | 79,58        |
| Granulins                                                        | P28799 GRN_HUMAN   | 0,87         | 1,05         | 1,28         |
|                                                                  |                    | 3,03         | 1,85         | 3,47         |
| Growth factor receptor-bound protein 2                           | P62993 GRB2_HUMAN  | <b>1,93</b>  | <b>3,74</b>  | <b>4,80</b>  |
|                                                                  |                    | <b>2,99</b>  | <b>3,11</b>  | <b>8,57</b>  |
| GTP-binding nuclear protein Ran                                  | P62826 RAN_HUMAN   | 2,29         | <b>4,71</b>  | <b>6,04</b>  |
|                                                                  |                    | 3,02         | 3,66         | 12,30        |
| Guanine nucleotide-binding protein G(I)/G(S)/G(T) subunit beta-2 | P62879 GBB2_HUMAN  | <b>2,03</b>  | <b>2,21</b>  | <b>2,52</b>  |
|                                                                  |                    | 0,00         | 0,00         | 0,00         |
| Guanine nucleotide-binding protein subunit beta-2-like 1         | P63244 GBLP_HUMAN  | <b>1,70</b>  | <b>3,47</b>  | <b>4,32</b>  |
|                                                                  |                    | 2,77         | 2,81         | <b>8,82</b>  |
| Haptoglobin                                                      | P00738 HPT_HUMAN   | <b>1,57</b>  | <b>1,92</b>  | <b>1,34</b>  |
|                                                                  |                    | <b>3,22</b>  | <b>2,74</b>  | <b>3,80</b>  |
| Heat shock 70 kDa protein 1                                      | P08107 HSP71_HUMAN | <b>1,66</b>  | <b>3,10</b>  | <b>3,43</b>  |
|                                                                  |                    | <b>2,35</b>  | <b>2,54</b>  | <b>7,34</b>  |
| Heat shock 70 kDa protein 4                                      | P34932 HSP74_HUMAN | <b>1,75</b>  | <b>2,60</b>  | <b>2,95</b>  |
|                                                                  |                    | <b>2,33</b>  | <b>2,23</b>  | <b>6,31</b>  |
| Heat shock cognate 71 kDa protein                                | P11142 HSP7C_HUMAN | <b>1,80</b>  | <b>2,90</b>  | <b>3,47</b>  |
|                                                                  |                    | <b>3,12</b>  | <b>3,29</b>  | <b>8,60</b>  |
| Heat shock protein 105 kDa                                       | Q92598 HS105_HUMAN | 2,13         | <b>3,04</b>  | 3,74         |
|                                                                  |                    | 2,29         | 3,05         | <b>8,63</b>  |
| Heat shock protein beta-1                                        | P04792 HSPB1_HUMAN | <b>1,74</b>  | <b>3,12</b>  | <b>4,06</b>  |
|                                                                  |                    | 2,84         | 3,20         | <b>8,85</b>  |
| Heat shock protein HSP 90-alpha                                  | P07900 HS90A_HUMAN | <b>2,21</b>  | <b>3,60</b>  | <b>3,99</b>  |
|                                                                  |                    | <b>2,86</b>  | <b>3,29</b>  | <b>9,46</b>  |
| Heat shock protein HSP 90-beta                                   | P08238 HS90B_HUMAN | <b>1,75</b>  | <b>3,19</b>  | <b>3,64</b>  |
|                                                                  |                    | <b>3,09</b>  | <b>3,96</b>  | <b>12,91</b> |
| Hemagglutinin                                                    | P03435 HEMA_I75A3  | 14,29        | <b>16,56</b> | <b>18,87</b> |
|                                                                  |                    | <b>14,01</b> | <b>18,51</b> | <b>59,70</b> |
| Hematological and neurological expressed 1 protein               | Q9UK76 HNT1_HUMAN  | 1,69         | 3,73         | 5,10         |
|                                                                  |                    | 6,03         | 5,84         | 16,33        |
| Hematopoietic lineage cell-specific protein                      | P14317 HCLS1_HUMAN | <b>2,04</b>  | <b>3,72</b>  | <b>5,80</b>  |
|                                                                  |                    | <b>4,22</b>  | <b>4,53</b>  | <b>12,84</b> |
| Heme-binding protein 1                                           | Q9NRV9 HEBP1_HUMAN | 1,65         | <b>4,02</b>  | <b>5,13</b>  |
|                                                                  |                    | 0,00         | 0,00         | 24,57        |
| Hemoglobin subunit alpha                                         | P69905 HBA_HUMAN   | 13,02        | <b>14,83</b> | 8,73         |
|                                                                  |                    | 80,53        | 52,69        | 75,94        |
| Hemoglobin subunit beta                                          | P68871 HBB_HUMAN   | 18,08        | 19,43        | 11,51        |
|                                                                  |                    | 23,58        | 16,16        | 24,02        |
| Hemopexin                                                        | P02790 HEMO_HUMAN  | 1,49         | <b>1,50</b>  | 1,08         |
|                                                                  |                    | <b>3,86</b>  | <b>3,65</b>  | <b>4,44</b>  |
| Hepatitis A virus cellular receptor 2                            | Q8TDQ0 TIMD3_HUMAN | 2,34         | <b>3,05</b>  | 3,19         |
|                                                                  |                    | 3,15         | 3,24         | 6,73         |
| Hepatoma-derived growth factor                                   | P51858 HDGF_HUMAN  | <b>1,50</b>  | <b>3,19</b>  | <b>4,96</b>  |
|                                                                  |                    | 3,04         | 2,60         | 6,46         |
| Heterogeneous nuclear ribonucleoprotein A/B                      | Q99729 ROAA_HUMAN  | 6,47         | 10,38        | 7,74         |
|                                                                  |                    | 3,29         | 4,32         | 9,14         |
| Heterogeneous nuclear ribonucleoprotein A3                       | P51991 ROA3_HUMAN  | 2,32         | 4,64         | 7,73         |
|                                                                  |                    | 3,73         | 4,09         | 8,68         |
| Heterogeneous nuclear ribonucleoprotein D0                       | Q14103 HNRPD_HUMAN | 1,65         | 3,35         | <b>4,34</b>  |
|                                                                  |                    | 3,71         | 3,09         | 11,79        |
| Heterogeneous nuclear ribonucleoprotein F                        | P52597 HNRPF_HUMAN | 1,49         | <b>2,82</b>  | <b>2,87</b>  |
|                                                                  |                    | 2,15         | 2,80         | 6,99         |
| Heterogeneous nuclear ribonucleoprotein G                        | P38159 HNRPG_HUMAN | <b>1,75</b>  | <b>3,36</b>  | <b>5,28</b>  |
|                                                                  |                    | 3,54         | 3,73         | 7,98         |
| Heterogeneous nuclear ribonucleoprotein H                        | P31943 HNRH1_HUMAN | 1,47         | <b>3,43</b>  | <b>3,59</b>  |
|                                                                  |                    | 0,00         | 0,00         | 9,12         |
| Heterogeneous nuclear ribonucleoprotein K                        | P61978 HNRPK_HUMAN | 1,86         | <b>3,20</b>  | <b>4,03</b>  |
|                                                                  |                    | <b>6,41</b>  | <b>5,18</b>  | <b>11,93</b> |
| Heterogeneous nuclear ribonucleoprotein L                        | P14866 HNRPL_HUMAN | 2,96         | <b>6,39</b>  | 7,01         |
|                                                                  |                    | 0,00         | 0,00         | 33,85        |
| Heterogeneous nuclear ribonucleoprotein M                        | P52272 HNRPM_HUMAN | 2,47         | 4,05         | 4,79         |
|                                                                  |                    | 5,48         | 5,06         | 7,27         |
| Heterogeneous nuclear ribonucleoprotein Q                        | O60506 HNRPQ_HUMAN | 2,39         | 4,57         | 4,47         |
|                                                                  |                    | 5,24         | 6,00         | 11,37        |
| Heterogeneous nuclear ribonucleoprotein R                        | O43390 HNRPR_HUMAN | 3,78         | 6,15         | 5,44         |
|                                                                  |                    | 0,00         | 0,00         | 25,96        |
| Heterogeneous nuclear ribonucleoprotein U                        | Q00839 HNRPU_HUMAN | <b>1,66</b>  | <b>2,84</b>  | <b>3,76</b>  |
|                                                                  |                    | 3,58         | 2,67         | <b>8,62</b>  |
| Heterogeneous nuclear ribonucleoproteins A2/B1                   | P22626 ROA2_HUMAN  | <b>1,96</b>  | <b>3,35</b>  | <b>4,77</b>  |
|                                                                  |                    | <b>3,44</b>  | <b>3,46</b>  | <b>7,63</b>  |
| Heterogeneous nuclear ribonucleoproteins C1/C2                   | P07910 HNRPC_HUMAN | 1,77         | <b>3,36</b>  | <b>4,46</b>  |
|                                                                  |                    | 2,81         | 2,45         | 6,04         |
| Hexokinase-3                                                     | P52790 HKK3_HUMAN  | 1,48         | 2,45         | 4,14         |
|                                                                  |                    | 2,11         | 1,79         | <b>6,93</b>  |
| High mobility group protein B1                                   | P09429 HMGB1_HUMAN | 1,74         | <b>5,56</b>  | <b>10,52</b> |
|                                                                  |                    | 2,38         |              | 6,97         |
| High mobility group protein B2                                   | P26583 HMGB2_HUMAN | 1,13         | 4,03         | 6,46         |
|                                                                  |                    | 4,66         | 6,08         | <b>15,97</b> |
| Histidine triad nucleotide-binding protein 1                     | P49773 HINT1_HUMAN | 2,08         | <b>4,21</b>  | <b>6,43</b>  |
|                                                                  |                    | <b>4,91</b>  | <b>5,30</b>  | <b>17,88</b> |
| Histone H1.3                                                     | P16402 H13_HUMAN   | 1,24         | <b>2,39</b>  | <b>3,60</b>  |
| Histone H2A.x                                                    | P16104 H2AX_HUMAN  | 1,03         | 2,59         | <b>5,30</b>  |
| Histone H2B type 1-M                                             | Q99879 H2B1M_HUMAN | <b>5,21</b>  | 4,57         | <b>11,72</b> |
|                                                                  |                    | 1,08         | <b>2,15</b>  | <b>3,01</b>  |
| Histone H2B type F-S                                             | P57053 H2BFS_HUMAN |              |              |              |
| Histone H3.1t                                                    | Q16695 H31T_HUMAN  | <b>3,91</b>  | <b>2,81</b>  | <b>6,64</b>  |
| Histone H3.2                                                     | Q71DI3 H32_HUMAN   | 1,56         | <b>2,34</b>  | <b>2,88</b>  |
| Histone H4                                                       | P62805 H4_HUMAN    | 1,81         | 2,59         | 2,84         |
|                                                                  |                    | <b>5,19</b>  | <b>3,92</b>  | <b>8,97</b>  |
| Histone-binding protein RBBP4                                    | Q09028 RBBP4_HUMAN | 2,16         | 3,17         | <b>2,85</b>  |
| HLA class I histocompatibility antigen, A-2 alpha chain          | P01892 1A02_HUMAN  | 1,01         | <b>1,68</b>  | <b>1,89</b>  |
| HLA class II histocompatibility antigen, DP alpha 1 chain        | P20036 DPA1_HUMAN  | 1,86         | 3,21         | 2,39         |
|                                                                  |                    | 2,95         | 3,19         | 7,65         |
| HLA class II histocompatibility antigen, DR alpha chain          | P01903 2DRA_HUMAN  | 1,37         | 1,95         | <b>2,72</b>  |
|                                                                  |                    | 1,62         | <b>1,78</b>  | <b>3,54</b>  |
| HLA class II histocompatibility antigen, DR-1 beta chain         | P01912 HB2B_HUMAN  | 1,32         | 1,37         | 1,25         |
|                                                                  |                    | 2,57         | 2,70         | <b>5,93</b>  |
| Hsc70-interacting protein                                        | P50502 F10A1_HUMAN | <b>2,59</b>  | <b>5,48</b>  | <b>7,71</b>  |
|                                                                  |                    | <b>3,27</b>  | <b>3,19</b>  | <b>11,50</b> |
| Hsp90 co-chaperone Cdc37                                         | Q16543 CDC37_HUMAN | <b>1,96</b>  | 4,16         | 5,93         |
|                                                                  |                    | <b>3,54</b>  | <b>3,91</b>  | <b>14,17</b> |
| Huntingtin-interacting protein K                                 | Q9NX55 HYPK_HUMAN  | 3,28         | 8,08         | 12,98        |
|                                                                  |                    | 4,33         | 6,90         | 22,20        |
| Importin subunit beta-1                                          | Q14974 IMB1_HUMAN  | 2,05         | 3,15         | 3,36         |
|                                                                  |                    | 3,31         | 2,64         | <b>9,20</b>  |
| Integrin alpha-L                                                 | P20701 ITAL_HUMAN  | 1,25         | 2,04         | 1,92         |

|                                                                             |                    |        |        |       |
|-----------------------------------------------------------------------------|--------------------|--------|--------|-------|
|                                                                             |                    | 2,06   | 2,95   | 8,51  |
| Integrin alpha-M                                                            | P11215 ITAM_HUMAN  | 0,74   | 0,99   | 1,15  |
|                                                                             |                    | 1,67   | 1,97   | 5,80  |
| Integrin beta-2                                                             | P05107 ITB2_HUMAN  | 0,95   | 1,24   | 1,58  |
|                                                                             |                    | 1,88   | 2,16   | 4,80  |
| Interferon-induced 17 kDa protein                                           | P05161 UCRP_HUMAN  | 1,47   | 2,82   | 4,06  |
| Interferon-induced guanylate-binding protein 1                              | P32455 GBP1_HUMAN  | 2,21   | 4,11   | 5,20  |
| Interleukin enhancer-binding factor 3                                       | Q12906 ILF3_HUMAN  | 1,81   | 2,93   | 3,48  |
|                                                                             |                    | 0,00   | 0,00   | 0,00  |
| Interleukin-1 receptor antagonist protein                                   | P18510 IL1RA_HUMAN | 1,08   | 1,34   | 1,47  |
|                                                                             |                    | 2,11   | 1,83   | 3,29  |
| Isocitrate dehydrogenase [NADP] cytoplasmic                                 | O75874 IDHC_HUMAN  | 2,11   | 3,13   | 3,51  |
|                                                                             |                    | 2,78   | 3,50   | 8,87  |
| Junctional adhesion molecule-like                                           | Q86YT9 JAML1_HUMAN | 1,36   | 1,52   | 1,66  |
|                                                                             |                    |        | 4,19   | 5,55  |
| Keratin, type I cytoskeletal 10                                             | P13645 K1C10_HUMAN | 1,38   | 1,61   | 1,39  |
|                                                                             |                    | 2,01   | 1,01   | 1,56  |
| Keratin, type I cytoskeletal 17                                             | Q04695 K1C17_HUMAN | 6,06   | 9,62   | 8,52  |
|                                                                             |                    | 14,21  | 11,84  | 22,60 |
| Keratin, type I cytoskeletal 9                                              | P35527 K1C9_HUMAN  | 1,47   | 1,33   | 1,13  |
|                                                                             |                    | 2,54   | 2,21   | 2,81  |
| Keratin, type II cytoskeletal 1                                             | P04264 K2C1_HUMAN  | 1,60   | 1,34   | 1,26  |
|                                                                             |                    | 2,87   | 2,10   | 2,40  |
| Keratin, type II cytoskeletal 8                                             | P05787 K2C8_HUMAN  | 15,52  | 21,52  | 15,78 |
|                                                                             |                    | 17,84  | 15,20  | 34,13 |
| KH domain-containing, RNA-binding, signal transduction-associated protein 1 | Q07666 KHDR1_HUMAN | 1,72   | 2,52   | 3,67  |
|                                                                             |                    | 6,82   | 6,20   | 13,33 |
| Kunitz-type protease inhibitor 1                                            | O43278 SPIT1_HUMAN | 1,78   | 2,73   | 3,01  |
|                                                                             |                    | 2,32   | 2,85   | 5,25  |
| Kynureninase                                                                | Q16719 KYNH_HUMAN  | 1,89   | 2,26   | 3,17  |
|                                                                             |                    | 2,01   | 2,68   | 8,80  |
| Lactoylglutathione lyase                                                    | Q04760 LGUL_HUMAN  |        |        |       |
|                                                                             |                    | 2,90   | 2,46   | 8,38  |
| Lamin-A/C                                                                   | P02545 LMNA_HUMAN  | 1,57   | 2,60   | 3,60  |
|                                                                             |                    | 2,92   | 2,65   | 7,29  |
| Lamina-associated polypeptide 2, isoform alpha                              | P42166 LAP2A_HUMAN | 1,66   | 2,75   | 3,88  |
|                                                                             |                    | 5,45   | 4,58   | 9,24  |
| Lamin-B1                                                                    | P20700 LMNB1_HUMAN | 1,41   | 2,97   | 3,97  |
|                                                                             |                    | 0,00   | 0,00   | 7,96  |
| Lamin-B2                                                                    | Q03252 LMNB2_HUMAN | 9,93   | 17,60  | 18,01 |
|                                                                             |                    | 0,00   | 0,00   | 9,26  |
| Leucine-rich repeat flightless-interacting protein 1                        | Q32MZ4 LRRF1_HUMAN | 1,57   | 3,41   | 4,90  |
|                                                                             |                    | 3,25   | 2,68   | 6,33  |
| Leukocyte common antigen                                                    | P08575 CD45_HUMAN  | 1,48   | 2,12   | 2,46  |
|                                                                             |                    | 0,00   | 0,00   | 7,13  |
| Leukocyte elastase inhibitor                                                | P30740 ILEU_HUMAN  | 2,10   | 3,13   | 3,26  |
|                                                                             |                    | 2,63   | 2,54   | 6,43  |
| Leukocyte immunoglobulin-like receptor subfamily B member 4                 | Q8NHJ6 LIRB4_HUMAN | 1,60   | 3,04   | 2,78  |
|                                                                             |                    | 3,53   | 3,30   | 8,11  |
| Leukosialin                                                                 | P16150 LEUK_HUMAN  | 0,72   | 1,86   | 2,23  |
| Leukotriene A-4 hydrolase                                                   | P09960 LKHA4_HUMAN | 1,33   | 2,14   | 2,52  |
|                                                                             |                    | 2,25   | 2,26   | 6,57  |
| LIM and SH3 domain protein 1                                                | Q14847 LASP1_HUMAN | 1,78   | 4,10   | 5,65  |
|                                                                             |                    | 2,96   | 3,28   | 10,46 |
| LIM domain and actin-binding protein 1                                      | Q9UHB6 LIMA1_HUMAN | 2,56   | 4,45   | 6,40  |
|                                                                             |                    | 0,00   | 0,00   | 0,00  |
| L-lactate dehydrogenase A chain                                             | P00338 LDHA_HUMAN  | 2,03   | 3,30   | 3,60  |
|                                                                             |                    | 2,83   | 2,85   | 7,61  |
| L-lactate dehydrogenase B chain                                             | P07195 LDHB_HUMAN  | 1,75   | 2,67   | 2,63  |
|                                                                             |                    | 3,07   | 2,84   | 7,16  |
| Lupus La protein                                                            | P05455 LA_HUMAN    | 1,67   | 3,41   | 4,85  |
|                                                                             |                    | 4,02   | 3,84   | 8,75  |
| Lymphocyte cytosolic protein 2                                              | Q13094 LCP2_HUMAN  | 1,79   | 3,30   | 5,27  |
| Lymphocyte-specific protein 1                                               | P33241 LSP1_HUMAN  | 1,62   | 3,29   | 5,05  |
|                                                                             |                    | 3,36   | 3,34   | 8,44  |
| Lysosomal alpha-glucosidase                                                 | P10253 LYAG_HUMAN  | 0,00   | 0,00   | 0,00  |
|                                                                             |                    | 5,90   | 6,02   | 16,78 |
| Lysosomal alpha-mannosidase                                                 | O00754 MA2B1_HUMAN | 0,94   | 1,09   | 1,37  |
|                                                                             |                    | 2,39   | 1,95   | 5,15  |
| Lysozyme C                                                                  | P61626 LYSC_HUMAN  | 0,53   | 0,56   | 0,79  |
|                                                                             |                    | 1,63   | 1,14   | 1,56  |
| Macrophage colony-stimulating factor 1                                      | P09603 CSF1_HUMAN  | 1,29   | 1,75   | 2,22  |
|                                                                             |                    | 1,96   | 2,16   | 5,05  |
| Macrophage mannose receptor 1-like protein 1                                | Q5VSK2 MRC1L_HUMAN | 1,07   | 1,56   | 2,43  |
|                                                                             |                    | 1,94   | 3,41   | 10,00 |
| Macrophage metalloelastase                                                  | P39900 MMP12_HUMAN | 1,12   | 1,16   | 1,44  |
|                                                                             |                    | 3,15   | 2,30   | 3,99  |
| Macrophage migration inhibitory factor                                      | P14174 MIF_HUMAN   |        |        |       |
|                                                                             |                    | 2,12   | 2,94   | 8,27  |
| Macrophage scavenger receptor types I and II                                | P21757 MSRE_HUMAN  | 1,53   | 3,29   | 4,67  |
|                                                                             |                    | 2,55   | 3,04   | 10,00 |
| Macrophage-capping protein                                                  | P40121 CAPG_HUMAN  | 1,94   | 3,48   | 4,32  |
|                                                                             |                    | 3,51   | 3,87   | 12,18 |
| Malate dehydrogenase, cytoplasmic                                           | P40925 MDHC_HUMAN  | 1,64   | 2,26   | 2,71  |
|                                                                             |                    | 2,43   | 2,61   | 7,03  |
| Malate dehydrogenase, mitochondrial                                         | P40926 MDHM_HUMAN  | 1,41   | 2,33   | 2,56  |
|                                                                             |                    | 2,40   | 2,12   | 4,55  |
| Matrilysin                                                                  | P09237 MMP7_HUMAN  |        |        |       |
|                                                                             |                    | 3,02   | 3,00   | 3,96  |
| Matrix metalloproteinase-9                                                  | P14780 MMP9_HUMAN  | 0,55   | 0,53   | 0,46  |
|                                                                             |                    | 1,31   | 1,24   | 1,46  |
| Matrix protein 1                                                            | Q9EA40 M1_I77A4    | 12,21  | 20,69  | 33,79 |
|                                                                             |                    | 8,46   | 9,57   | 32,50 |
| Metalloproteinase inhibitor 2                                               | P16035 TIMP2_HUMAN | 0,91   | 1,33   | 1,50  |
|                                                                             |                    | 2,68   | 2,18   | 2,96  |
| Microtubule-associated protein 4                                            | P27816 MAP4_HUMAN  | 1,77   | 4,45   | 6,53  |
|                                                                             |                    | 4,14   | 2,87   | 10,77 |
| Microtubule-associated protein RP/EB family member 1                        | Q15691 MARE1_HUMAN | 2,18   | 3,58   | 4,93  |
|                                                                             |                    | 3,23   | 3,66   | 10,02 |
| Mitogen-activated protein kinase 1                                          | P28482 MK01_HUMAN  | 1,87   | 3,24   | 4,20  |
| Mitogen-activated protein kinase 14                                         | Q16539 MK14_HUMAN  | 4,97   | 6,96   | 6,71  |
| Moesin                                                                      | P26038 MOES_HUMAN  | 1,46   | 2,32   | 2,90  |
|                                                                             |                    | 2,59   | 2,78   | 7,55  |
| Monocyte differentiation antigen CD14                                       | P08571 CD14_HUMAN  | 0,96   | 1,51   | 1,45  |
| Mucin-16                                                                    | Q8WXI7 MUC16_HUMAN | 122,87 | 128,80 | 52,52 |
|                                                                             |                    | 6,32   | 4,69   | 10,34 |
| Myosin light polypeptide 6                                                  | P60660 MYL6_HUMAN  | 1,78   | 3,20   | 3,85  |
|                                                                             |                    | 3,32   | 3,62   | 9,53  |
| Myosin regulatory light chain 12A                                           | P19105 ML12A_HUMAN | 2,29   | 3,70   | 5,07  |
|                                                                             |                    | 3,66   | 3,55   | 10,83 |
| Myosin-9                                                                    | P35579 MYH9_HUMAN  | 1,63   | 2,67   | 3,76  |
|                                                                             |                    | 3,19   | 2,69   | 7,81  |

|                                                                                |                    |              |              |              |
|--------------------------------------------------------------------------------|--------------------|--------------|--------------|--------------|
| Myotrophin                                                                     | P58546 MTPN_HUMAN  | 2,36         | 4,19         | 5,70         |
|                                                                                |                    | 0,00         | 0,00         | <b>12,77</b> |
| Myristoylated alanine-rich C-kinase substrate                                  | P29966 MARCS_HUMAN | 1,98         | 3,89         | <b>5,88</b>  |
|                                                                                |                    | 2,72         | 3,31         | <b>11,03</b> |
| N-acetyl-D-glucosamine kinase                                                  | Q9UJ70 NAGK_HUMAN  | 1,67         | 2,72         | <b>3,70</b>  |
|                                                                                |                    | 1,91         | 2,00         | <b>6,17</b>  |
| N-acetylglucosamine-6-sulfatase                                                | P15586 GNS_HUMAN   | 2,12         | 3,75         | <b>5,73</b>  |
|                                                                                |                    | 0,00         | 0,00         | 0,00         |
| NEDD8                                                                          | Q15843 NEDD8_HUMAN | 3,01         | 6,30         | 5,12         |
|                                                                                |                    | 12,50        | 13,26        | <b>32,27</b> |
| Nestin                                                                         | P48681 NEST_HUMAN  | 2,50         | <b>3,78</b>  | <b>4,18</b>  |
|                                                                                |                    | 2,70         | 3,12         | 4,75         |
| Neuraminidase                                                                  | Q09105 NRAM_I76AB  | 6,95         | 12,26        | 14,74        |
|                                                                                |                    | 0,00         | 8,08         | 23,93        |
| Neuroblast differentiation-associated protein AHNAK                            | Q09666 AHNK_HUMAN  | <b>1,74</b>  | <b>4,45</b>  | <b>7,35</b>  |
|                                                                                |                    | <b>3,78</b>  | <b>3,76</b>  | <b>12,64</b> |
| Neurogranin                                                                    | Q92686 NEUG_HUMAN  | 4,79         | 9,74         | 10,06        |
|                                                                                |                    | 0,00         | 0,00         | 9,74         |
| Neuropilin-1                                                                   | O14786 NRP1_HUMAN  | 1,00         | 1,10         | 1,10         |
|                                                                                |                    | 1,72         | 1,72         | <b>3,12</b>  |
| Neutral alpha-glucosidase AB                                                   | Q14697 GANAB_HUMAN | <b>1,86</b>  | <b>2,83</b>  | <b>2,31</b>  |
|                                                                                |                    | 0,00         | 0,00         | 5,38         |
| Neutrophil cytosol factor 2                                                    | P19878 NCF2_HUMAN  | <b>2,09</b>  | <b>3,21</b>  | <b>3,97</b>  |
|                                                                                |                    | 3,45         | 3,93         | 10,48        |
| Niban-like protein 1                                                           | Q96TA1 NIBL1_HUMAN | <b>1,80</b>  | <b>3,35</b>  | <b>3,96</b>  |
|                                                                                |                    | 4,60         | 5,83         | <b>16,92</b> |
| Non-POU domain-containing octamer-binding protein                              | Q15233 NONO_HUMAN  | <b>2,36</b>  | <b>3,81</b>  | <b>4,21</b>  |
|                                                                                |                    | 4,50         | 2,69         | <b>7,42</b>  |
| Non-specific lipid-transfer protein                                            | P22307 NLTP_HUMAN  | 1,69         | <b>3,29</b>  | <b>4,80</b>  |
|                                                                                |                    | 0,00         | 0,00         | 0,00         |
| Non-structural protein 1                                                       | Q463W9 NS1_I72A3   | <b>5,55</b>  | <b>13,52</b> | <b>16,92</b> |
|                                                                                |                    | 9,39         | <b>13,80</b> | <b>49,25</b> |
| Nuclear migration protein nudC                                                 | Q9Y266 NUDC_HUMAN  | 2,87         | <b>4,12</b>  | <b>5,01</b>  |
|                                                                                |                    | 0,00         | 0,00         | <b>15,22</b> |
| Nucleobindin-1                                                                 | Q02818 NUCB1_HUMAN | 0,89         | 1,25         | 1,41         |
|                                                                                |                    | <b>2,04</b>  | <b>1,63</b>  | <b>3,13</b>  |
| Nucleolin                                                                      | P19338 NUCL_HUMAN  | 1,15         | <b>2,43</b>  | <b>4,67</b>  |
|                                                                                |                    | <b>2,44</b>  | <b>2,18</b>  | <b>6,60</b>  |
| Nucleophosmin                                                                  | P06748 NPM_HUMAN   | 1,33         | <b>2,30</b>  | <b>3,67</b>  |
|                                                                                |                    | <b>2,54</b>  | <b>2,26</b>  | <b>5,13</b>  |
| Nucleoprotein                                                                  | P06827 NCAP_I72A2  | <b>9,79</b>  | <b>24,90</b> | <b>32,38</b> |
|                                                                                |                    | <b>13,06</b> | <b>18,96</b> | <b>78,64</b> |
| Nucleoside diphosphate kinase A                                                | P15531 NDKA_HUMAN  | <b>2,36</b>  | <b>3,76</b>  | <b>4,56</b>  |
|                                                                                |                    | 0,00         | 4,47         | 13,23        |
| Nucleoside diphosphate kinase B                                                | P22392 NDKB_HUMAN  | <b>4,80</b>  | 4,59         | <b>11,30</b> |
| Nucleosome assembly protein 1-like 4                                           | Q99733 NP1L4_HUMAN | 3,25         | 6,48         | 10,91        |
|                                                                                |                    | 11,39        | 9,45         | 26,10        |
| Obg-like ATPase 1                                                              | Q9NTK5 OLA1_HUMAN  | 1,93         | 3,20         | <b>3,78</b>  |
|                                                                                |                    | 0,00         | 0,00         | 0,00         |
| Osteoclast-stimulating factor 1                                                | Q92882 OSTF1_HUMAN | 1,36         | <b>2,55</b>  | <b>3,14</b>  |
|                                                                                |                    | 0,00         | 0,00         | 7,92         |
| Osteopontin                                                                    | P10451 OSTP_HUMAN  | 0,62         | 0,75         | 0,95         |
|                                                                                |                    | <b>1,99</b>  | 1,24         | <b>2,12</b>  |
| Palmitoyl-protein thioesterase 1                                               | P50897 PPT1_HUMAN  | 0,83         | 1,17         | 1,56         |
|                                                                                |                    | 2,16         | 4,89         | 12,34        |
| Parathymosin                                                                   | P20962 PTMS_HUMAN  | 1,43         | <b>2,44</b>  | <b>3,85</b>  |
|                                                                                |                    | 2,68         | 1,68         | <b>6,76</b>  |
| PDZ and LIM domain protein 5                                                   | Q96HC4 PDLI5_HUMAN | 1,45         | 4,39         | <b>6,28</b>  |
|                                                                                |                    | 0,00         | 0,00         | 48,77        |
| Pentraxin-related protein PTX3                                                 | P26022 PTX3_HUMAN  | 1,86         | 1,43         | 1,35         |
|                                                                                |                    | 1,75         | <b>1,67</b>  | 2,41         |
| Peptidyl-prolyl cis-trans isomerase A                                          | P62937 PPIA_HUMAN  | <b>1,89</b>  | <b>2,95</b>  | <b>3,74</b>  |
|                                                                                |                    | <b>3,27</b>  | <b>3,64</b>  | <b>10,96</b> |
| Peptidyl-prolyl cis-trans isomerase B                                          | P23284 PPIB_HUMAN  | 1,29         | <b>1,94</b>  | <b>1,73</b>  |
|                                                                                |                    | <b>2,25</b>  | <b>2,17</b>  | <b>3,00</b>  |
| Peptidyl-prolyl cis-trans isomerase, mitochondrial                             | P30405 PPIF_HUMAN  | <b>1,69</b>  | <b>3,08</b>  | <b>3,98</b>  |
|                                                                                |                    | <b>4,43</b>  | <b>4,79</b>  | <b>8,50</b>  |
| Perilipin-3                                                                    | O60664 PLIN3_HUMAN | 2,07         | <b>5,59</b>  | <b>9,97</b>  |
| Peroxiredoxin-1                                                                | Q06830 PRDX1_HUMAN | 1,76         | <b>2,98</b>  | <b>4,02</b>  |
|                                                                                |                    | <b>2,96</b>  | <b>3,29</b>  | <b>9,32</b>  |
| Peroxiredoxin-2                                                                | P32119 PRDX2_HUMAN | <b>1,95</b>  | <b>4,00</b>  | <b>5,55</b>  |
|                                                                                |                    | 5,65         | 6,00         | 13,87        |
| Peroxiredoxin-6                                                                | P30041 PRDX6_HUMAN | 2,16         | 3,81         | <b>5,20</b>  |
|                                                                                |                    | 5,32         | 6,77         | 17,75        |
| PEST proteolytic signal-containing nuclear protein                             | Q8WW12 PCNP_HUMAN  | 1,68         | <b>4,32</b>  | 5,00         |
| Phosphatidylethanolamine-binding protein 1                                     | P30086 PEBP1_HUMAN | 1,90         | <b>3,36</b>  | <b>4,27</b>  |
|                                                                                |                    | 5,70         | 5,61         | <b>13,45</b> |
| Phosphatidylinositol transfer protein alpha isoform                            | Q00169 PIPNA_HUMAN | 1,49         | <b>2,65</b>  | <b>4,07</b>  |
| Phosphoglucomutase-1                                                           | P36871 PGM1_HUMAN  | 2,43         | 3,98         | 3,83         |
|                                                                                |                    | 7,28         | 6,28         | <b>15,49</b> |
| Phosphoglucomutase-2                                                           | Q96G03 PGM2_HUMAN  | 2,04         | 2,38         | 3,03         |
|                                                                                |                    | 2,74         | 2,29         | 6,97         |
| Phosphoglycerate kinase 1                                                      | P00558 PGK1_HUMAN  | <b>1,60</b>  | <b>2,43</b>  | <b>2,81</b>  |
|                                                                                |                    | <b>2,25</b>  | <b>2,57</b>  | <b>7,13</b>  |
| Phosphoglycerate mutase 1                                                      | P18669 PGAM1_HUMAN | <b>1,96</b>  | <b>2,94</b>  | <b>3,72</b>  |
|                                                                                |                    | <b>3,76</b>  | <b>3,27</b>  | <b>9,93</b>  |
| Phospholipid hydroperoxide glutathione peroxidase, mitochondrial               | P36969 GPX4_HUMAN  | 0,00         | 4,49         | 5,53         |
| Phostensin                                                                     | Q6NYC8 PHTNS_HUMAN | <b>1,48</b>  | <b>2,77</b>  | <b>4,59</b>  |
|                                                                                |                    | 0,00         | 0,00         | 10,24        |
| Plasma protease C1 inhibitor                                                   | P05155 IC1_HUMAN   | 2,32         | 2,41         | <b>5,92</b>  |
| Plasminogen activator inhibitor 1 RNA-binding protein                          | Q8NC51 PAIRB_HUMAN | <b>2,38</b>  | <b>4,29</b>  | <b>6,13</b>  |
|                                                                                |                    | 3,12         | 2,85         | 8,83         |
| Plastin-2                                                                      | P13796 PLSL_HUMAN  | <b>1,63</b>  | <b>2,71</b>  | <b>3,31</b>  |
|                                                                                |                    | <b>2,66</b>  | <b>3,13</b>  | <b>9,58</b>  |
| Platelet glycoprotein 4                                                        | P16671 CD36_HUMAN  | 0,85         | 1,16         | <b>1,49</b>  |
| Platelet-activating factor acetylhydrolase IB subunit alpha OS=Pan troglodytes | Q5IS43 LIS1_PANTR  | <b>2,37</b>  | <b>3,08</b>  | <b>3,10</b>  |
|                                                                                |                    | 0,00         | 0,00         | 0,00         |
| Platelet-activating factor acetylhydrolase                                     | Q13093 PAFA_HUMAN  | <b>2,44</b>  | <b>1,96</b>  | 1,40         |
|                                                                                |                    | 3,03         | <b>3,33</b>  | 5,06         |
| Pleckstrin                                                                     | P08567 PLEK_HUMAN  | 2,06         | 2,29         | 3,96         |
|                                                                                |                    | 3,34         | 3,41         | <b>7,47</b>  |
| Plectin-1                                                                      | Q15149 PLEC1_HUMAN | <b>1,74</b>  | <b>3,11</b>  | <b>3,96</b>  |
|                                                                                |                    | <b>3,11</b>  | <b>3,72</b>  | <b>9,59</b>  |
| Plexin domain-containing protein 2                                             | Q6UX71 PXDC2_HUMAN | 1,19         | 1,57         | 1,44         |
|                                                                                |                    | 3,73         | 3,71         | 5,91         |
| PML-RARA-regulated adapter molecule 1                                          | Q96QH2 PRAM_HUMAN  | 1,68         | 2,81         | 3,92         |
|                                                                                |                    | 3,98         | 3,71         | <b>9,21</b>  |
| Poly(rC)-binding protein 1                                                     | Q15365 PCBP1_HUMAN | <b>2,31</b>  | <b>4,21</b>  | 5,76         |
|                                                                                |                    | 2,14         | 3,63         | <b>11,15</b> |
| Polyadenylate-binding protein 1                                                | P11940 PABP1_HUMAN | <b>2,06</b>  | <b>2,97</b>  | <b>3,39</b>  |
|                                                                                |                    | 5,03         | 3,02         | 8,92         |
| Prefoldin subunit 2                                                            | Q9UHV9 PFD2_HUMAN  | 1,51         | 4,26         | 6,42         |

|                                                                    |                     |                |                |                |
|--------------------------------------------------------------------|---------------------|----------------|----------------|----------------|
|                                                                    |                     | 0,00           | 0,00           | 13,53          |
| Proactivator polypeptide                                           | P07602[SAP_HUMAN]   | 1,05           | <b>1,62</b>    | <b>2,50</b>    |
|                                                                    |                     | <b>2,37</b>    | <b>2,74</b>    | <b>7,33</b>    |
| Profilin-1                                                         | P07737[PROF1_HUMAN] | <b>1,54</b>    | <b>2,29</b>    | <b>2,99</b>    |
|                                                                    |                     | <b>2,25</b>    | <b>2,51</b>    | <b>6,77</b>    |
| Profilin-2                                                         | P35080[PROF2_HUMAN] | 4,83           | 6,05           | 4,51           |
|                                                                    |                     | 5,84           | 0,00           | 8,09           |
| Programmed cell death 6-interacting protein                        | Q8WUM4[PDC6I_HUMAN] | <b>1,32</b>    | <b>1,93</b>    | <b>2,48</b>    |
|                                                                    |                     | <b>4,19</b>    | <b>3,93</b>    | <b>9,92</b>    |
| Programmed cell death protein 5                                    | O14737[PDCD5_HUMAN] | 3,29           | 7,96           | 12,73          |
|                                                                    |                     | 8,41           | 7,86           | <b>20,84</b>   |
| Proliferating cell nuclear antigen                                 | P12004[PCNA_HUMAN]  | 2,04           | 4,05           | <b>4,59</b>    |
|                                                                    |                     | 4,25           | 3,89           | 9,68           |
| Proliferation-associated protein 2G4                               | Q9UQ80[PA2G4_HUMAN] | <b>1,81</b>    | <b>3,49</b>    | <b>3,90</b>    |
|                                                                    |                     | 3,54           | <b>4,01</b>    | <b>9,86</b>    |
| Prolow-density lipoprotein receptor-related protein 1              | Q07954[LRP1_HUMAN]  | 1,97           | <b>2,98</b>    | <b>2,38</b>    |
|                                                                    |                     | 2,99           | 3,58           | <b>7,47</b>    |
| Proteasome activator complex subunit 1                             | Q06323[PSME1_HUMAN] | 2,29           | <b>3,84</b>    | <b>4,37</b>    |
|                                                                    |                     | <b>2,80</b>    | <b>2,70</b>    | <b>9,84</b>    |
| Proteasome activator complex subunit 2                             | Q9UL46[PSME2_HUMAN] | 1,33           | <b>2,92</b>    | <b>4,84</b>    |
|                                                                    |                     | <b>3,71</b>    | <b>3,70</b>    | <b>14,69</b>   |
| Proteasome activator complex subunit 4                             | Q14997[PSME4_HUMAN] | 41,84          | 57,64          | 34,41          |
|                                                                    |                     | 194,44         | 151,93         | 231,18         |
| Proteasome subunit alpha type-1                                    | P25786[PSA1_HUMAN]  | <b>1,73</b>    | <b>2,17</b>    | <b>2,52</b>    |
|                                                                    |                     | <b>2,31</b>    | <b>2,33</b>    | <b>4,99</b>    |
| Proteasome subunit alpha type-2                                    | P25787[PSA2_HUMAN]  | 1,97           | 3,70           | 3,75           |
|                                                                    |                     | 3,56           | 3,24           | 6,39           |
| Proteasome subunit alpha type-3                                    | P25788[PSA3_HUMAN]  | <b>1,52</b>    | <b>2,41</b>    | <b>2,63</b>    |
|                                                                    |                     | <b>1,55</b>    | <b>2,07</b>    | <b>4,14</b>    |
| Proteasome subunit alpha type-4                                    | P25789[PSA4_HUMAN]  | 1,41           | 2,20           | <b>2,47</b>    |
|                                                                    |                     | 2,05           | 1,85           | 4,32           |
| Proteasome subunit alpha type-5                                    | P28066[PSA5_HUMAN]  | 2,98           | 3,72           | 5,54           |
|                                                                    |                     | 0,00           | 5,05           | 9,47           |
| Proteasome subunit alpha type-6                                    | P60900[PSA6_HUMAN]  | <b>2,00</b>    | <b>2,53</b>    | <b>2,80</b>    |
|                                                                    |                     | <b>2,77</b>    | <b>2,53</b>    | <b>5,03</b>    |
| Proteasome subunit alpha type-7                                    | O14818[PSA7_HUMAN]  | <b>1,39</b>    | <b>1,90</b>    | <b>2,31</b>    |
|                                                                    |                     | 2,95           | 2,89           | 6,17           |
| Proteasome subunit beta type-1                                     | P20618[PSB1_HUMAN]  | 1,91           | 3,06           | 3,15           |
|                                                                    |                     | 2,11           | 1,83           | <b>4,31</b>    |
| Proteasome subunit beta type-10                                    | P40306[PSB10_HUMAN] | 1,08           | 1,84           | 2,17           |
|                                                                    |                     | 1,89           | 2,19           | 4,32           |
| Proteasome subunit beta type-2                                     | P49721[PSB2_HUMAN]  | 1,44           | <b>1,93</b>    | <b>2,57</b>    |
|                                                                    |                     | 4,16           | <b>3,00</b>    | <b>6,41</b>    |
| Proteasome subunit beta type-5                                     | P28074[PSB5_HUMAN]  | 1,36           | 2,22           | 1,96           |
|                                                                    |                     | 1,88           | 1,89           | 2,96           |
| Proteasome subunit beta type-7                                     | Q99436[PSB7_HUMAN]  | 1,28           | 1,69           | <b>2,23</b>    |
|                                                                    |                     | 1,68           | 1,49           | 4,45           |
| Proteasome subunit beta type-8                                     | P28062[PSB8_HUMAN]  | 1,28           | 1,83           | 2,20           |
|                                                                    |                     | 2,11           | <b>1,93</b>    | <b>4,41</b>    |
| Protein AHNK2                                                      | Q8IVF2[AHNK2_HUMAN] | <b>9999,00</b> | <b>9999,00</b> | <b>9999,00</b> |
|                                                                    |                     | 25,50          | 20,06          | 22,38          |
| Protein CDV3 homolog                                               | Q9UKY7[CDV3_HUMAN]  | 2,18           | <b>4,13</b>    | <b>6,09</b>    |
|                                                                    |                     | 4,30           | 3,10           | <b>9,72</b>    |
| Protein disulfide-isomerase A3                                     | P30101[PDIA3_HUMAN] | <b>1,51</b>    | <b>2,49</b>    | <b>2,21</b>    |
|                                                                    |                     | <b>2,55</b>    | <b>2,28</b>    | <b>3,77</b>    |
| Protein disulfide-isomerase A4                                     | P13667[PDIA4_HUMAN] | <b>1,79</b>    | <b>2,45</b>    | <b>2,04</b>    |
|                                                                    |                     | <b>2,05</b>    | <b>1,60</b>    | <b>2,93</b>    |
| Protein disulfide-isomerase A6                                     | Q15084[PDIA6_HUMAN] | <b>2,32</b>    | <b>3,71</b>    | <b>4,36</b>    |
|                                                                    |                     | 0,00           | 0,00           | 0,00           |
| Protein disulfide-isomerase                                        | P07237[PDIA1_HUMAN] | <b>1,50</b>    | <b>2,31</b>    | <b>1,75</b>    |
|                                                                    |                     | <b>2,14</b>    | <b>2,06</b>    | <b>3,07</b>    |
| Protein DJ-1                                                       | Q99497[PARK7_HUMAN] | 1,69           | <b>2,90</b>    | <b>3,75</b>    |
|                                                                    |                     | 1,98           | <b>2,42</b>    | <b>7,36</b>    |
| Protein FAM21B                                                     | Q5SNT6[FA21B_HUMAN] | 1,66           | <b>3,06</b>    | <b>5,10</b>    |
| Protein kinase C and casein kinase substrate in neurons protein 2  | Q9UNF0[PACN2_HUMAN] | 1,91           | 4,93           | <b>6,48</b>    |
|                                                                    |                     | 7,86           | 13,28          | 38,78          |
| Protein LAP2                                                       | Q96RT1[LAP2_HUMAN]  | <b>2,58</b>    | 4,97           | 6,09           |
| Protein LYRIC                                                      | Q86UE4[LYRIC_HUMAN] | 1,87           | <b>3,58</b>    | <b>6,77</b>    |
|                                                                    |                     | 3,31           | 2,52           | 8,18           |
| Protein LZIC                                                       | Q8WZA0[LZIC_HUMAN]  | 1,94           | <b>4,61</b>    | <b>8,20</b>    |
| Protein phosphatase inhibitor 2                                    | P41236[IPP2_HUMAN]  | 1,75           | <b>4,18</b>    | 6,48           |
|                                                                    |                     | 4,91           | 3,48           | 17,53          |
| Protein S100-A10                                                   | P60903[S10AA_HUMAN] | 1,26           | <b>2,29</b>    | <b>3,47</b>    |
|                                                                    |                     | 2,56           | 2,76           | <b>6,93</b>    |
| Protein S100-A11                                                   | P31949[S10AB_HUMAN] | 1,55           | 2,68           | <b>3,86</b>    |
|                                                                    |                     | <b>3,21</b>    | <b>3,25</b>    | <b>11,41</b>   |
| Protein S100-A4                                                    | P26447[S10A4_HUMAN] | 1,40           | <b>3,05</b>    | 4,17           |
|                                                                    |                     | <b>2,64</b>    | <b>3,11</b>    | <b>10,56</b>   |
| Protein S100-A6                                                    | P06703[S10A6_HUMAN] | 2,21           | 3,38           | 3,97           |
|                                                                    |                     | <b>3,13</b>    | <b>3,36</b>    | <b>13,34</b>   |
| Protein S100-A8                                                    | P05109[S10A8_HUMAN] | <b>1,41</b>    | <b>1,54</b>    | <b>1,92</b>    |
|                                                                    |                     | <b>2,17</b>    | <b>2,37</b>    | <b>4,69</b>    |
| Protein S100-A9                                                    | P06702[S10A9_HUMAN] | <b>1,54</b>    | <b>1,83</b>    | <b>2,68</b>    |
|                                                                    |                     | <b>2,60</b>    | <b>2,50</b>    | <b>5,59</b>    |
| Protein SET                                                        | Q01105[SET_HUMAN]   | 2,00           | 3,27           | <b>5,49</b>    |
|                                                                    |                     | <b>3,08</b>    | <b>2,35</b>    | <b>7,44</b>    |
| Protein-L-isoaspartate(D-aspartate) O-methyltransferase            | P22061[PIMT_HUMAN]  | <b>1,70</b>    | 3,48           | 4,49           |
|                                                                    |                     | 3,14           | <b>3,40</b>    | 5,97           |
| Prothymosin alpha                                                  | P06454[PTMA_HUMAN]  | 1,27           | 2,02           | <b>3,12</b>    |
|                                                                    |                     | 1,61           | 1,27           | 2,52           |
| Pterin-4-alpha-carbinolamine dehydratase                           | P61457[PHS_HUMAN]   | 1,49           | <b>1,87</b>    | 3,37           |
| Purine nucleoside phosphorylase                                    | P00491[PNPH_HUMAN]  | 1,73           | 3,21           | 2,87           |
|                                                                    |                     | 2,82           | 3,70           | 6,91           |
| Puromycin-sensitive aminopeptidase                                 | P55786[PSA_HUMAN]   | 2,07           | 3,38           | 3,67           |
|                                                                    |                     | <b>2,69</b>    | <b>2,51</b>    | <b>6,45</b>    |
| Putative elongation factor 1-alpha-like 3                          | Q5VTE0[EF1A3_HUMAN] |                |                |                |
|                                                                    |                     | <b>4,42</b>    | <b>4,53</b>    | <b>13,70</b>   |
| Putative heterogeneous nuclear ribonucleoprotein A1-like protein 3 | P0C7M2[RA1L3_HUMAN] | 1,49           | <b>2,84</b>    | <b>3,64</b>    |
|                                                                    |                     | 3,39           | 3,13           | <b>7,42</b>    |
| Putative nucleoside diphosphate kinase                             | O60361[NDK8_HUMAN]  | <b>1,78</b>    | <b>3,67</b>    | <b>4,72</b>    |
| Putative phospholipase B-like 2                                    | Q8NHP8[PLBL2_HUMAN] | 1,96           | 3,70           | 6,68           |
|                                                                    |                     | <b>4,66</b>    | <b>3,80</b>    | <b>12,11</b>   |
| Putative tropomyosin alpha-3 chain-like protein                    | A6NL28[TPM3L_HUMAN] | <b>1,87</b>    | 4,26           | <b>8,14</b>    |
|                                                                    |                     | <b>2,89</b>    | <b>3,04</b>    | <b>8,86</b>    |
| Pyridoxal kinase                                                   | O00764[PDXK_HUMAN]  | <b>2,04</b>    | <b>2,75</b>    | <b>3,01</b>    |
|                                                                    |                     | 4,54           | 3,93           | <b>9,86</b>    |
| Pyruvate kinase isozymes M1/M2                                     | P14618[KPYM_HUMAN]  | <b>2,21</b>    | <b>4,09</b>    | <b>5,19</b>    |
|                                                                    |                     | <b>3,06</b>    | <b>4,23</b>    | <b>13,04</b>   |
| Quinone oxidoreductase PIG3                                        | Q53FA7[QORX_HUMAN]  | 0,00           | 0,00           | <b>7,10</b>    |
| Rab GDP dissociation inhibitor beta                                | P50395[GDIB_HUMAN]  | <b>1,81</b>    | <b>2,57</b>    | <b>2,92</b>    |
|                                                                    |                     | <b>3,28</b>    | <b>3,24</b>    | <b>8,13</b>    |
| Ran-specific GTPase-activating protein                             | P43487[RANG_HUMAN]  | 1,75           | 4,40           | <b>7,39</b>    |
|                                                                    |                     | 2,26           | 5,86           | 20,30          |

|                                                                                   |                     |                |             |                |
|-----------------------------------------------------------------------------------|---------------------|----------------|-------------|----------------|
| Ras GTPase-activating protein-binding protein 2                                   | Q9UN86 G3BP2_HUMAN  | 1,58           | <b>3,12</b> | <b>4,30</b>    |
| Ras GTPase-activating-like protein IQGAP1                                         | P46940 IQGA1_HUMAN  | <b>1,81</b>    | <b>3,38</b> | <b>4,37</b>    |
|                                                                                   |                     | <b>3,28</b>    | <b>3,59</b> | <b>9,05</b>    |
| Ras suppressor protein 1                                                          | Q15404 RSU1_HUMAN   | 1,27           | <b>2,64</b> | <b>4,52</b>    |
|                                                                                   |                     | 2,33           | 1,90        | 5,03           |
| Ras-related C3 botulinum toxin substrate 1                                        | P63000 RAC1_HUMAN   | 3,45           | 6,31        | 7,78           |
|                                                                                   |                     | 3,38           | 5,48        | 18,85          |
| Ras-related protein Rab-10                                                        | P61026 RAB10_HUMAN  | 0,00           | 7,92        | 11,71          |
|                                                                                   |                     | 3,93           | 3,73        | 13,51          |
| Ras-related protein Rab-11A                                                       | P62491 RB11A_HUMAN  | 1,95           | <b>3,89</b> | <b>5,49</b>    |
| Ras-related protein Rab-1A                                                        | P62820 RAB1A_HUMAN  | 2,00           | 3,71        | <b>4,52</b>    |
| Ras-related protein Rab-1B                                                        | Q9H0U4 RAB1B_HUMAN  | 0,00           | 0,00        | 5,40           |
|                                                                                   |                     | 12,53          | 14,36       | 37,78          |
| Ras-related protein Rap-2b                                                        | P61225 RAP2B_HUMAN  | 1,12           | 1,84        | 2,27           |
|                                                                                   |                     | 0,00           | 0,00        | 27,57          |
| Receptor expression-enhancing protein 5                                           | Q00765 REEP5_HUMAN  | 2,23           | <b>3,53</b> | 4,76           |
| Reticulon-1                                                                       | Q16799 RTN1_HUMAN   | <b>1,92</b>    | <b>4,34</b> | <b>6,99</b>    |
|                                                                                   |                     | 4,37           | 7,93        | <b>23,27</b>   |
| Retinal dehydrogenase 1                                                           | P00352 AL1A1_HUMAN  | <b>1,83</b>    | <b>2,26</b> | <b>2,44</b>    |
|                                                                                   |                     | 0,00           | 0,00        | 9,86           |
| Retinal dehydrogenase 2                                                           | O94788 AL1A2_HUMAN  | <b>1,81</b>    | <b>2,34</b> | <b>3,19</b>    |
|                                                                                   |                     | 0,00           | 0,00        | 0,00           |
| Retinol-binding protein 4                                                         | P02753 RET4_HUMAN   | 0,00           | 0,00        | 0,00           |
|                                                                                   |                     | <b>9999,00</b> | 9999,00     | <b>9999,00</b> |
| Rho GDP-dissociation inhibitor 1                                                  | P52565 GDIR1_HUMAN  | <b>1,43</b>    | <b>2,72</b> | <b>3,60</b>    |
|                                                                                   |                     | <b>2,93</b>    | <b>3,24</b> | <b>10,18</b>   |
| Rho GDP-dissociation inhibitor 2                                                  | P52566 GDIR2_HUMAN  | <b>1,38</b>    | <b>2,40</b> | <b>3,16</b>    |
|                                                                                   |                     | <b>2,08</b>    | <b>2,41</b> | <b>6,47</b>    |
| Rho guanine nucleotide exchange factor 1                                          | Q92888 ARHG1_HUMAN  | 1,42           | 2,91        | 3,65           |
|                                                                                   |                     | 1,44           | 1,49        | 3,20           |
| Ribonuclease inhibitor                                                            | P13489 RNI_HUMAN    | 2,10           | <b>3,72</b> | <b>4,87</b>    |
|                                                                                   |                     | <b>3,82</b>    | <b>4,22</b> | <b>14,87</b>   |
| Ribonuclease K6                                                                   | Q93091 RNASE6_HUMAN | 1,03           | 1,69        | 2,31           |
|                                                                                   |                     | 2,65           | 2,03        | 4,25           |
| Ribosome-binding protein 1                                                        | Q9P2E9 RRBP1_HUMAN  | <b>1,34</b>    | <b>2,72</b> | <b>3,78</b>    |
|                                                                                   |                     | 2,71           | <b>2,83</b> | <b>5,56</b>    |
| S-adenosylmethionine synthetase isoform type-2                                    | P31153 METK2_HUMAN  | 1,77           | 2,92        | <b>3,06</b>    |
|                                                                                   |                     | 0,00           | 0,00        | 28,33          |
| Scavenger receptor cysteine-rich type 1 protein M130                              | Q86VB7 C163A_HUMAN  | 2,67           | 4,29        | <b>4,29</b>    |
| Septin-2                                                                          | Q15019 SEPT2_HUMAN  | <b>1,80</b>    | <b>2,93</b> | <b>3,88</b>    |
| Septin-7                                                                          | Q16181 SEPT7_HUMAN  | <b>2,12</b>    | <b>3,32</b> | <b>3,71</b>    |
| Septin-9                                                                          | Q9UHD8 SEPT9_HUMAN  | 1,82           | <b>3,30</b> | 4,65           |
|                                                                                   |                     | 5,48           | 0,00        | 7,76           |
| Serglycin                                                                         | P10124 SRGN_HUMAN   | 1,19           | 0,89        | <b>1,56</b>    |
| Serine/threonine-protein kinase 10                                                | O94804 STK10_HUMAN  | 2,29           | 3,81        | 5,40           |
|                                                                                   |                     | 3,31           | 2,64        | 5,49           |
| Serine/threonine-protein kinase 4                                                 | Q13043 STK4_HUMAN   | 4,15           | <b>5,33</b> | <b>6,23</b>    |
| Serine/threonine-protein kinase PAK 2                                             | Q13177 PAK2_HUMAN   | 2,71           | <b>6,20</b> | <b>9,59</b>    |
|                                                                                   |                     | 0,00           | 0,00        | 20,56          |
| Serine/threonine-protein phosphatase 2A 65 kDa regulatory subunit A alpha isoform | P30153 2AAA_HUMAN   | <b>1,97</b>    | <b>3,51</b> | <b>4,50</b>    |
|                                                                                   |                     | <b>3,41</b>    | <b>3,90</b> | <b>12,12</b>   |
| Serine/threonine-protein phosphatase PP1-alpha catalytic subunit                  | P62136 PP1A_HUMAN   | 2,50           | 4,18        | 4,18           |
|                                                                                   |                     | 3,86           | 4,42        | 10,68          |
| Serotransferrin                                                                   | P02787 TRFE_HUMAN   | <b>2,43</b>    | <b>2,68</b> | <b>1,72</b>    |
|                                                                                   |                     | <b>1,46</b>    | 1,41        | <b>2,25</b>    |
| Serpin B8                                                                         | P50452 SPB8_HUMAN   | 1,67           | 2,82        | <b>3,28</b>    |
| Serum albumin                                                                     | P02768 ALBU_HUMAN   | <b>1,64</b>    | <b>1,50</b> | <b>1,24</b>    |
|                                                                                   |                     | <b>2,25</b>    | <b>1,85</b> | <b>6,70</b>    |
| SH3 domain-binding glutamic acid-rich-like protein 3                              | Q9H299 SH3L3_HUMAN  | 1,38           | 1,38        | 2,12           |
|                                                                                   |                     | <b>2,93</b>    | <b>3,01</b> | <b>9,37</b>    |
| SH3 domain-binding glutamic acid-rich-like protein                                | O75368 SH3L1_HUMAN  | 1,42           | <b>2,64</b> | <b>4,47</b>    |
|                                                                                   |                     | <b>2,75</b>    | <b>3,41</b> | <b>10,65</b>   |
| Sialic acid synthase                                                              | Q9NR45 SIAS_HUMAN   | <b>3,56</b>    | <b>5,47</b> | <b>7,03</b>    |
| Signal recognition particle 14 kDa protein                                        | P37108 SRP14_HUMAN  | <b>1,92</b>    | <b>5,26</b> | <b>5,77</b>    |
| Signal-regulatory protein beta-1 isoform 3                                        | Q5TFQ8 SIRBL_HUMAN  | 1,75           | 3,08        | 6,22           |
|                                                                                   |                     | 2,04           | 3,59        | 10,64          |
| Signal-regulatory protein beta-1                                                  | O00241 SIRB1_HUMAN  | 1,23           | 4,37        | 8,25           |
|                                                                                   |                     | 2,81           | 5,22        | <b>13,56</b>   |
| SLAM family member 5                                                              | Q9UIB8 SLAF5_HUMAN  | <b>1,16</b>    | 2,38        | <b>2,79</b>    |
|                                                                                   |                     | 1,71           | 2,18        | 6,73           |
| Small nuclear ribonucleoprotein Sm D2                                             | P62316 SMD2_HUMAN   | 1,46           | 1,67        | 2,87           |
|                                                                                   |                     | 3,53           | 4,52        | <b>6,52</b>    |
| Small ubiquitin-related modifier 2                                                | P61956 SUMO2_HUMAN  | 1,94           | 3,02        | 4,27           |
|                                                                                   |                     | 2,66           | 2,99        | 8,73           |
| Sortilin                                                                          | Q99523 SORT_HUMAN   | 1,14           | <b>2,20</b> | <b>3,05</b>    |
|                                                                                   |                     | 0,00           | 0,00        | 0,00           |
| Sorting nexin-12                                                                  | Q9UMY4 SNX12_HUMAN  | 0,92           | 2,45        | 3,45           |
|                                                                                   |                     | 5,12           | 3,43        | 13,37          |
| Sorting nexin-2                                                                   | O60749 SNX2_HUMAN   | 1,69           | <b>3,63</b> | <b>6,32</b>    |
| SPARC                                                                             | P09486 SPRC_HUMAN   | 1,05           | 1,25        | 1,41           |
|                                                                                   |                     | <b>1,78</b>    | <b>2,57</b> | <b>3,97</b>    |
| Spectrin alpha chain, brain                                                       | Q13813 SPTA2_HUMAN  | 3,49           | 4,36        | <b>4,18</b>    |
|                                                                                   |                     | 0,00           | 0,00        | 10,44          |
| Spectrin beta chain, brain 1                                                      | Q01082 SPTB2_HUMAN  | 5,30           | <b>7,41</b> | <b>6,88</b>    |
| Spliceosome RNA helicase BAT1                                                     | Q13838 UAP56_HUMAN  | <b>3,21</b>    | <b>4,57</b> | <b>4,11</b>    |
| Splicing factor 1                                                                 | Q15637 SF01_HUMAN   | 2,73           | 3,28        | <b>4,85</b>    |
|                                                                                   |                     | 6,71           | 0,00        | 6,20           |
| Splicing factor, arginine/serine-rich 1                                           | Q07955 SFRS1_HUMAN  | <b>1,44</b>    | <b>2,47</b> | <b>4,06</b>    |
| Splicing factor, arginine/serine-rich 6                                           | Q13247 SFRS6_HUMAN  | 1,23           | 2,11        | <b>2,34</b>    |
| Staphylococcal nuclease domain-containing protein 1                               | Q7KZF4 SND1_HUMAN   | <b>1,79</b>    | <b>3,69</b> | <b>3,65</b>    |
|                                                                                   |                     | 0,00           | 0,00        | 0,00           |
| Stathmin                                                                          | P16949 STMN1_HUMAN  | 2,43           | <b>4,86</b> | <b>6,34</b>    |
|                                                                                   |                     | <b>8,03</b>    | <b>7,64</b> | <b>25,27</b>   |
| Stress-70 protein, mitochondrial                                                  | P38646 GRP75_HUMAN  | <b>2,12</b>    | <b>3,81</b> | <b>3,23</b>    |
|                                                                                   |                     | 2,06           | 2,78        | 8,39           |
| Stress-induced-phosphoprotein 1                                                   | P31948 STIP1_HUMAN  | <b>2,09</b>    | <b>4,68</b> | <b>6,62</b>    |
|                                                                                   |                     | <b>4,30</b>    | <b>4,97</b> | <b>15,91</b>   |
| Sulfhydryl oxidase 1                                                              | O00391 QSOX1_HUMAN  | 1,02           | 1,11        | 1,08           |
|                                                                                   |                     | 2,25           | 1,26        | 2,40           |
| Superoxide dismutase [Cu-Zn]                                                      | P00441 SODC_HUMAN   | 1,50           | <b>2,95</b> | <b>4,17</b>    |
|                                                                                   |                     | 1,85           | 2,27        | <b>7,02</b>    |
| Superoxide dismutase [Mn], mitochondrial                                          | P04179 SODM_HUMAN   | <b>1,51</b>    | <b>2,49</b> | <b>2,88</b>    |

|                                                            |                    |             |             |              |
|------------------------------------------------------------|--------------------|-------------|-------------|--------------|
|                                                            |                    | 2,03        | <b>2,41</b> | <b>4,78</b>  |
| Switch-associated protein 70                               | Q9UH65 SWP70_HUMAN | 1,15        | 2,61        | <b>4,00</b>  |
| Syndecan-4                                                 | P31431 SDC4_HUMAN  | 1,87        | 2,01        | <b>1,95</b>  |
|                                                            |                    | 0,00        | 0,00        | 8,24         |
| Talin-1                                                    | Q9Y490 TLN1_HUMAN  | <b>1,90</b> | <b>3,41</b> | <b>4,11</b>  |
|                                                            |                    | <b>3,93</b> | <b>3,39</b> | <b>9,65</b>  |
| Target of Myb protein 1                                    | O60784 TOM1_HUMAN  | 2,06        | 3,62        | 5,71         |
|                                                            |                    | 9,38        | 13,37       | 32,19        |
| T-complex protein 1 subunit alpha                          | P17987 TCPA_HUMAN  | 3,74        | 4,46        | 5,25         |
|                                                            |                    | 5,49        | 7,26        | <b>19,09</b> |
| T-complex protein 1 subunit beta                           | P78371 TCPB_HUMAN  | <b>2,11</b> | <b>3,97</b> | <b>4,70</b>  |
|                                                            |                    | 3,27        | 3,07        | <b>10,19</b> |
| T-complex protein 1 subunit delta                          | P50991 TCPD_HUMAN  | 2,82        | <b>5,09</b> | <b>6,15</b>  |
| T-complex protein 1 subunit epsilon                        | P48643 TCPE_HUMAN  | <b>1,95</b> | <b>3,85</b> | <b>4,02</b>  |
|                                                            |                    | 6,20        | 5,65        | <b>14,83</b> |
| T-complex protein 1 subunit gamma                          | P49368 TCPG_HUMAN  | <b>3,33</b> | <b>4,91</b> | <b>5,21</b>  |
|                                                            |                    | 5,53        | 7,36        | <b>23,95</b> |
| T-complex protein 1 subunit theta                          | P50990 TCPO_HUMAN  | <b>2,36</b> | <b>3,91</b> | <b>4,53</b>  |
|                                                            |                    | <b>5,20</b> | 4,00        | <b>8,77</b>  |
| T-complex protein 1 subunit zeta                           | P40227 TCPZ_HUMAN  | 1,54        | <b>3,18</b> | <b>3,25</b>  |
|                                                            |                    | 0,00        | 0,00        | 6,67         |
| Testin                                                     | Q9UGI8 TES_HUMAN   | 0,00        | <b>5,98</b> | <b>4,84</b>  |
|                                                            |                    | 0,00        | 0,00        | 0,00         |
| Tetratricopeptide repeat protein 28                        | Q96AY4 TTC28_HUMAN | 6,38        | 3,18        | <b>14,62</b> |
| Thiopurine S-methyltransferase                             | P51580 TPMT_HUMAN  | 2,62        | 3,11        | 2,68         |
|                                                            |                    | 0,00        | 0,00        | 25,07        |
| Thioredoxin domain-containing protein 12                   | O95881 TXD12_HUMAN | 1,54        | <b>2,87</b> | <b>3,05</b>  |
| Thioredoxin                                                | P10599 THIO_HUMAN  | 1,53        | <b>3,15</b> | <b>5,46</b>  |
|                                                            |                    | 3,19        | 3,23        | <b>13,13</b> |
| Thioredoxin reductase 1, cytoplasmic                       | Q16881 TRXR1_HUMAN | 1,23        | <b>1,61</b> | <b>1,85</b>  |
|                                                            |                    | <b>1,91</b> | <b>1,67</b> | <b>4,11</b>  |
| Thioredoxin-dependent peroxide reductase, mitochondrial    | P30048 PRDX3_HUMAN | 2,87        | 4,39        | 5,10         |
|                                                            |                    | 0,00        | 9,03        | 14,34        |
| Thioredoxin-like protein 1                                 | O43396 TXNL1_HUMAN | 2,00        | 2,76        | 3,19         |
|                                                            |                    | 4,18        | 2,91        | 10,52        |
| THO complex subunit 4                                      | Q86V81 THOC4_HUMAN | 1,53        | 2,86        | 3,76         |
|                                                            |                    | 7,63        | 4,80        | 9,65         |
| Thymidine phosphorylase                                    | P19971 TYPH_HUMAN  | <b>2,08</b> | <b>2,95</b> | <b>4,42</b>  |
|                                                            |                    | <b>2,60</b> | <b>3,84</b> | <b>11,87</b> |
| Thymosin beta-10                                           | P63313 TYB10_HUMAN | 2,03        | 4,01        | 2,48         |
|                                                            |                    | 3,35        |             | 6,23         |
| Thymosin beta-4-like protein 3                             | A8MW06 TMSL3_HUMAN | <b>2,59</b> | <b>1,96</b> | <b>7,85</b>  |
| Transaldolase                                              | P37837 TALDO_HUMAN | <b>1,44</b> | <b>2,08</b> | <b>2,80</b>  |
|                                                            |                    | <b>2,40</b> | <b>2,32</b> | <b>5,32</b>  |
| Transcription elongation factor B polypeptide 1            | Q15369 ELOC_HUMAN  | 3,16        | 4,39        | 11,07        |
|                                                            |                    | 5,22        | 4,62        | <b>12,01</b> |
| Transcription elongation factor B polypeptide 2            | Q15370 ELOB_HUMAN  | <b>2,05</b> | <b>3,18</b> | <b>4,26</b>  |
|                                                            |                    | 0,00        | 0,00        | 19,00        |
| Transferrin receptor protein 1                             | P02786 TFR1_HUMAN  | <b>1,51</b> | <b>3,23</b> | <b>3,64</b>  |
|                                                            |                    | <b>2,11</b> | <b>4,57</b> | <b>11,40</b> |
| Transforming growth factor-beta-induced protein ig-h3      | Q15582 BGH3_HUMAN  | 1,03        | 1,21        | 1,16         |
|                                                            |                    | <b>2,30</b> | <b>1,79</b> | <b>2,39</b>  |
| Transgelin-2                                               | P37802 TAGL2_HUMAN | <b>1,73</b> | <b>4,66</b> | <b>7,05</b>  |
|                                                            |                    | <b>3,71</b> | <b>5,89</b> | <b>17,05</b> |
| Transitional endoplasmic reticulum ATPase                  | P55072 TERA_HUMAN  | <b>2,86</b> | <b>4,21</b> | <b>5,01</b>  |
|                                                            |                    | <b>3,86</b> | <b>3,49</b> | <b>8,99</b>  |
| Transketolase                                              | P29401 TKT_HUMAN   | <b>1,52</b> | <b>2,03</b> | <b>2,29</b>  |
|                                                            |                    | <b>2,26</b> | <b>2,05</b> | <b>5,30</b>  |
| Translationally-controlled tumor protein                   | P13693 TCTP_HUMAN  | 1,59        | <b>2,43</b> | <b>3,70</b>  |
|                                                            |                    | <b>2,57</b> | <b>2,69</b> | <b>8,36</b>  |
| Translin                                                   | Q15631 TSN_HUMAN   | 1,26        | <b>1,91</b> | <b>2,88</b>  |
|                                                            |                    | 2,69        | 2,09        | <b>5,93</b>  |
| Transmembrane glycoprotein NMB                             | Q14956 GPNMB_HUMAN | 0,83        | 1,49        | 1,68         |
|                                                            |                    | 2,02        | 2,44        | 7,19         |
| Transmembrane protease, serine 13                          | Q8BYE2 TMPSD_HUMAN | 1,20        | 1,23        | 1,31         |
|                                                            |                    | 1,30        | 1,50        | 1,79         |
| Triosephosphate isomerase                                  | P60174 TPIS_HUMAN  | <b>1,59</b> | <b>2,31</b> | <b>2,93</b>  |
|                                                            |                    | <b>3,03</b> | <b>3,11</b> | <b>7,95</b>  |
| Tripeptidyl-peptidase 1 OS=Pan troglodytes                 | Q5IS74 TPP1_PANTR  | 1,90        | 2,93        | 2,88         |
|                                                            |                    | 2,88        | 2,04        | <b>3,95</b>  |
| Tropomodulin-3                                             | Q9NYL9 TMOD3_HUMAN | 1,68        | 3,01        | <b>3,84</b>  |
|                                                            |                    | 0,00        | 0,00        | 21,92        |
| Tropomyosin alpha-3 chain                                  | P06753 TPM3_HUMAN  | 2,34        | 4,12        | 6,56         |
|                                                            |                    | 4,80        | 4,06        | 13,60        |
| Tropomyosin alpha-4 chain                                  | P67936 TPM4_HUMAN  | 1,60        | <b>3,45</b> | <b>5,93</b>  |
|                                                            |                    | <b>2,90</b> | <b>2,87</b> | <b>8,77</b>  |
| Trypsin-3                                                  | P35030 TRY3_HUMAN  | 1,35        | 1,22        | 1,29         |
|                                                            |                    | 1,59        | 1,64        | 1,98         |
| Tryptophanyl-tRNA synthetase, cytoplasmic                  | P23381 SYWC_HUMAN  | <b>1,41</b> | <b>2,28</b> | <b>2,68</b>  |
|                                                            |                    | <b>2,17</b> | <b>2,22</b> | <b>6,24</b>  |
| Tubulin alpha-1A chain                                     | Q71U36 TBA1A_HUMAN | <b>2,20</b> | <b>3,74</b> | <b>4,24</b>  |
| Tubulin alpha-1C chain                                     | Q9BQE3 TBA1C_HUMAN | <b>4,17</b> | <b>3,68</b> | <b>10,58</b> |
| Tubulin beta chain                                         | P07437 TBB5_HUMAN  | 2,05        | 3,68        | 4,09         |
|                                                            |                    | 3,29        | 3,89        | 11,37        |
| Tubulin beta-2C chain                                      | P68371 TBB2C_HUMAN | 2,16        | 4,51        | 3,30         |
|                                                            |                    | 0,00        | 0,00        | 12,81        |
| Tubulin-specific chaperone A                               | O75347 TBCA_HUMAN  | <b>1,81</b> | <b>3,85</b> | <b>5,73</b>  |
|                                                            |                    | <b>3,00</b> | <b>3,61</b> | <b>14,16</b> |
| Tumor protein D54                                          | O43399 TPD54_HUMAN | 4,08        | 7,75        | <b>16,41</b> |
|                                                            |                    | 3,03        | 3,30        | 15,59        |
| Twinfilin-2                                                | Q6IBS0 TWTF2_HUMAN | <b>1,87</b> | 3,32        | <b>4,43</b>  |
|                                                            |                    | <b>2,92</b> | <b>3,29</b> | <b>9,68</b>  |
| Tyrosine-protein phosphatase non-receptor type 6           | P29350 PTN6_HUMAN  | <b>1,97</b> | <b>3,33</b> | <b>3,86</b>  |
|                                                            |                    | 3,14        | <b>3,52</b> | <b>10,22</b> |
| Tyrosine-protein phosphatase non-receptor type substrate 1 | P78324 SHPS1_HUMAN | <b>2,50</b> | <b>6,13</b> | <b>8,31</b>  |
|                                                            |                    | 6,41        | 5,39        | 15,56        |
| Tyrosyl-tRNA synthetase, cytoplasmic                       | P54577 SYYC_HUMAN  | 2,87        | 3,92        | 6,17         |
|                                                            |                    | 1,86        | 2,60        | 11,10        |
| U1 small nuclear ribonucleoprotein A                       | P09012 SNRPA_HUMAN | 2,07        | 3,62        | 5,07         |
|                                                            |                    | <b>8,90</b> | 5,49        | 11,93        |
| Ubiquitin carboxyl-terminal hydrolase isozyme L1           | P09936 UCHL1_HUMAN | 0,96        | 1,90        | 2,22         |
|                                                            |                    | 0,00        | 0,00        | 8,23         |
| Ubiquitin carboxyl-terminal hydrolase isozyme L3           | P15374 UCHL3_HUMAN | <b>3,68</b> | <b>5,39</b> | <b>6,06</b>  |
| Ubiquitin                                                  | P62988 UBIQ_HUMAN  | 1,93        | <b>3,23</b> | <b>3,79</b>  |
|                                                            |                    | <b>2,94</b> | <b>2,55</b> | <b>7,81</b>  |
| Ubiquitin-associated protein 2-like                        | Q14157 UBP2L_HUMAN | 3,30        | 6,74        | 8,87         |
|                                                            |                    | 8,36        | 6,66        | 22,41        |
| Ubiquitin-conjugating enzyme E2 L3                         | P68036 UB2L3_HUMAN | 2,53        | <b>4,71</b> | <b>5,46</b>  |
|                                                            |                    | <b>5,29</b> | <b>4,55</b> | <b>13,82</b> |
| Ubiquitin-conjugating enzyme E2 N                          | P61088 UBE2N_HUMAN | 2,70        | <b>4,95</b> | <b>6,05</b>  |

|                                                          |                    |              |               |               |
|----------------------------------------------------------|--------------------|--------------|---------------|---------------|
| Ubiquitin-like modifier-activating enzyme 1              | P22314 UBA1_HUMAN  | 1,97<br>3,08 | 3,41<br>2,49  | 3,79<br>9,99  |
| UBX domain-containing protein 1                          | Q04323 UBXN1_HUMAN | 2,71<br>0,00 | 4,40<br>0,00  | 5,99<br>4,52  |
| UMP-CMP kinase                                           | P30085 KCY_HUMAN   | 1,48<br>6,24 | 3,39<br>0,00  | 3,98<br>14,35 |
| UPF0485 protein C1orf144                                 | Q7Z422 CA144_HUMAN | 4,38         | 5,17          | 4,85          |
| UTP--glucose-1-phosphate uridylyltransferase             | Q16851 UGPA_HUMAN  | 1,79<br>4,33 | 3,59<br>3,11  | 4,35<br>11,42 |
| UV excision repair protein RAD23 homolog B               | P54727 RD23B_HUMAN | 1,52<br>2,90 | 2,64<br>3,20  | 4,25<br>8,17  |
| Vacuolar protein sorting-associated protein 29           | Q9UBQ0 VPS29_HUMAN | 2,73<br>2,76 | 3,96<br>2,84  | 3,94<br>5,49  |
| WAS/WASL-interacting protein family member 1             | O43516 WIPF1_HUMAN | 2,54         | 6,44          | 7,27          |
| Vasodilator-stimulated phosphoprotein                    | P50552 VASP_HUMAN  | 1,56<br>6,28 | 2,39<br>10,31 | 3,17<br>14,65 |
| WD repeat-containing protein 1                           | O75083 WDR1_HUMAN  | 1,88<br>2,14 | 2,54<br>2,29  | 3,10<br>6,63  |
| Vesicle-associated membrane protein-associated protein A | Q9P0L0 VAPA_HUMAN  | 2,15<br>8,01 | 4,53<br>5,19  | 7,48<br>14,85 |
| Vimentin                                                 | P08670 VIME_HUMAN  | 1,47<br>4,52 | 4,05<br>4,42  | 8,17<br>14,43 |
| Vinculin                                                 | P18206 VINC_HUMAN  | 1,61<br>3,56 | 2,59<br>3,08  | 2,84<br>6,77  |
| V-type proton ATPase catalytic subunit A                 | P38606 VATA_HUMAN  | 2,04<br>6,52 | 2,91<br>5,83  | 2,82<br>12,72 |
| V-type proton ATPase subunit B, brain isoform            | P21281 VATB2_HUMAN | 1,94<br>0,00 | 4,04<br>0,00  | 3,51<br>20,33 |
| V-type proton ATPase subunit C 1                         | P21283 VATC1_HUMAN | 2,12<br>8,18 | 4,01<br>6,80  | 4,44<br>10,08 |
| V-type proton ATPase subunit D                           | Q9Y5K8 VATD_HUMAN  | 2,03         | 2,28          | 4,81          |
| V-type proton ATPase subunit E 1                         | P36543 VATE1_HUMAN | 1,47<br>4,14 | 4,11<br>4,52  | 5,80<br>11,33 |
| V-type proton ATPase subunit G 1                         | O75348 VATG1_HUMAN | 1,88<br>2,22 | 4,59<br>2,81  | 4,96<br>10,22 |
| Xaa-Pro dipeptidase                                      | P12955 PEPD_HUMAN  | 1,69<br>2,33 | 2,11<br>1,64  | 2,58<br>5,45  |
| Zyxin                                                    | Q15942 ZYX_HUMAN   | 1,93<br>4,04 | 3,77<br>3,55  | 5,84<br>12,00 |

**bold** = statistically significant quantitation result ( $p < 0,05$ )  
0,000 = protein identified but no quantitation result
