# Supplementary material for: Quantitative Subcellular Proteome and Secretome Profiling of Influenza A Virus-Infected Human Primary Macrophages
Source: PLoS Pathog. 2011 May 12;7(5):e1001340. doi: 10.1371/journal.ppat.1001340 (PMC3093355; doi:10.1371/journal.ppat.1001340)
Supplement: Table S2 — Protein identification and quantitation results from ProteinPilot for all the analyzed samples. (1.86 MB XLS) [file ppat.1001340.s005.xls]

## Sheet: mitochondrial I
Unused	Total	Seq.cov			iTRAQ	p-Value	iTRAQ	p-Value	iTRAQ	p-Value
ProtScore	ProtScore	(%)	SwissProt Access	Protein Name	115:114	115:114	116:114	116:114	117:114	117:114
8.71	8.73	32	P61981|1433G_HUMAN	14-3-3 protein gamma - Homo sapiens	1.704		2.9129	0.1813	4.0332	0.1676
2.46	5.15	35.5	P63104|1433Z_HUMAN	14-3-3 protein zeta/delta - Homo sapiens	1.5067		1.6445		1.9223
2.36	2.46	24.1	O60613|SEP15_HUMAN	15 kDa selenoprotein precursor - Homo sapiens	0.7859	0.0716	0.9985	0.9818	0.9468	0.5253
2.65	2.73	11.8	Q9NUQ2|PLCE_HUMAN	1-acyl-sn-glycerol-3-phosphate acyltransferase epsilon - Homo sapiens
2.66	2.7	15	Q53EU6|PLCH_HUMAN	1-acyl-sn-glycerol-3-phosphate acyltransferase theta - Homo sapiens	0.6972		0.9326		1.0671
2.5	2.56	21.1	P09543|CN37_HUMAN	2',3'-cyclic-nucleotide 3'-phosphodiesterase - Homo sapiens	1.1772	0.2329	1.2429	0.308	1.2786	0.2695
23.84	23.86	50.4	Q16698|DECR_HUMAN	2,4-dienoyl-CoA reductase, mitochondrial precursor - Homo sapiens	0.9791	0.653	0.9346	0.2126	0.7432	0
2.04	2.08	6.6	Q6L8Q7|PDE25_HUMAN	2',5'-phosphodiesterase - Homo sapiens	1.0335		1.289		1.4036
7.15	7.33	18.2	Q15392|DHC24_HUMAN	24-dehydrocholesterol reductase precursor - Homo sapiens	1.0462	0.6009	1.2625	0.0828	1.237	0.1601
6.71	6.72	28.1	Q9UEH5|Q9UEH5_HUMAN	24-kDa subunit of complex I (Fragment) - Homo sapiens	1.0816	0.8611	0.7849	0.1282	0.9854	0.9382
2.17	2.2	16.7	P51665|PSD7_HUMAN	26S proteasome non-ATPase regulatory subunit 7 - Homo sapiens	0.9711	0.839	2.6762	0.0115	5.7528	0.0045
4.28	4.32	18.3	P82914|RT15_HUMAN	28S ribosomal protein S15, mitochondrial precursor - Homo sapiens	0.8806	0.1266	0.8112	0.1361	0.8275	0.4077
4.56	4.57	19.7	Q9Y3D3|RT16_HUMAN	28S ribosomal protein S16, mitochondrial precursor - Homo sapiens	1.0653	0.5427	1.0949	0.3571	0.9633	0.7462
2.41	2.42	15.6	Q96EL2|RT24_HUMAN	28S ribosomal protein S24, mitochondrial precursor - Homo sapiens	1.2169	0.1335	1.0945	0.4064	0.9306	0.4424
2.14	2.14	24.4	Q9BYN8|RT26_HUMAN	28S ribosomal protein S26, mitochondrial precursor - Homo sapiens	0.9427	0.4442	0.8466	0.2414	0.8601	0.0744
5.63	5.68	22	P82673|RT35_HUMAN	28S ribosomal protein S35, mitochondrial precursor - Homo sapiens	1.5515		1.3581		1.2488
9.66	9.68	55.4	Q9Y2R9|RT07_HUMAN	28S ribosomal protein S7, mitochondrial precursor - Homo sapiens	0.8846	0.2478	0.9529	0.4863	0.8028	0.091
28	28.08	33.3	Q02218|ODO1_HUMAN	2-oxoglutarate dehydrogenase E1 component, mitochondrial precursor - Homo sapiens	0.955	0.1925	0.8802	0.0133	0.8009	0
4.78	4.78	16.8	Q9H2F3|3BHS7_HUMAN	3 beta-hydroxysteroid dehydrogenase type 7 - Homo sapiens
11.14	11.14	39.4	P42126|D3D2_HUMAN	3,2-trans-enoyl-CoA isomerase, mitochondrial precursor - Homo sapiens	0.9252	0.7164	0.9989	0.9898	0.6072	0.1357
1.71	1.71	15.2	Q6P161|RM54_HUMAN	39S ribosomal protein 54, mitochondrial precursor - Homo sapiens	0.856	0.1587	0.8643	0.0161	0.6991	0.2989
6.54	6.76	31.4	Q9BYD6|RM01_HUMAN	39S ribosomal protein L1, mitochondrial precursor - Homo sapiens	0.9105	0.1029	0.8528	0.0502	0.8093	0.1655
11.9	11.92	65.1	Q9Y3B7|RM11_HUMAN	39S ribosomal protein L11, mitochondrial precursor - Homo sapiens	0.8751	0.1943	0.9452	0.5694	0.8298	0.066
12.69	12.7	53	P52815|RM12_HUMAN	39S ribosomal protein L12, mitochondrial precursor - Homo sapiens	0.9081	0.2651	0.9164	0.3282	0.7507	0.0113
3.9	3.91	26.4	Q9BYD1|RM13_HUMAN	39S ribosomal protein L13, mitochondrial - Homo sapiens	1.1439		1.4878	0.7065	7.178
9.28	9.32	40.5	Q9P015|RM15_HUMAN	39S ribosomal protein L15, mitochondrial precursor - Homo sapiens	0.8174	0.0944	0.7027	0.0005	0.6708	0.0027
2.77	2.78	27.5	Q9NX20|RM16_HUMAN	39S ribosomal protein L16, mitochondrial precursor - Homo sapiens	0.8289	0.1243	0.7935	0.2162	0.801	0.2808
2.96	3.66	41.1	Q9NRX2|RM17_HUMAN	39S ribosomal protein L17, mitochondrial precursor - Homo sapiens	1.1728	0.2108	1.0822	0.3877	0.7791	0.2568
2.17	2.17	20.6	Q9H0U6|RM18_HUMAN	39S ribosomal protein L18, mitochondrial precursor - Homo sapiens	0.9654	0.7607	0.9247	0.6565	0.8497	0.653
4.25	4.28	23.3	P49406|RM19_HUMAN	39S ribosomal protein L19, mitochondrial precursor - Homo sapiens	0.8858	0.1835	0.8241	0.0954	0.7204	0.0439
1.5	1.51	22.6	Q5T653|RM02_HUMAN	39S ribosomal protein L2, mitochondrial precursor - Homo sapiens	1.1913	0.4019	1.0489	0.8818	0.9695	0.9284
5.14	5.14	34.2	Q9BYC9|RM20_HUMAN	39S ribosomal protein L20, mitochondrial precursor - Homo sapiens	1.1639	0.1657	1.0821	0.2876	1.0043	0.9549
3.46	3.46	34.3	Q96A35|RM24_HUMAN	39S ribosomal protein L24, mitochondrial precursor - Homo sapiens	0.987	0.8392	0.844	0.0374	0.6419	0.0031
2.48	2.51	28.1	Q13084|RM28_HUMAN	39S ribosomal protein L28, mitochondrial precursor - Homo sapiens	0.8376	0.0689	0.8755	0.3397	0.7751	0.0859
3.13	3.19	28	Q8TCC3|RM30_HUMAN	39S ribosomal protein L30, mitochondrial precursor - Homo sapiens	0.9786	0.9553	0.9056	0.4436	0.9165	0.6848
1.4	1.4	12.2	Q9BYC8|RM32_HUMAN	39S ribosomal protein L32, mitochondrial precursor - Homo sapiens	1.0244	0.9239	1.0307	0.8907	0.7698	0.1986
7.12	7.16	31.9	Q9BZE1|RM37_HUMAN	39S ribosomal protein L37, mitochondrial precursor - Homo sapiens	0.8888	0.3226	0.7245	0.0024	0.6883	0.0177
7.42	7.44	30	Q96DV4|RM38_HUMAN	39S ribosomal protein L38, mitochondrial precursor - Homo sapiens	0.8692	0.1834	0.8828	0.2638	0.7375	0.0053
2.9	2.95	19.9	Q9NQ50|RM40_HUMAN	39S ribosomal protein L40, mitochondrial precursor - Homo sapiens	0.7943	0.6329	1.1818	0.733	1.0728	0.8819
6.8	6.81	31.2	Q8N983|RM43_HUMAN	39S ribosomal protein L43, mitochondrial precursor - Homo sapiens	0.9533	0.6256	0.9281	0.531	0.8101	0.0649
2.96	3.09	25.9	Q9H9J2|RM44_HUMAN	39S ribosomal protein L44, mitochondrial precursor - Homo sapiens	0.7706	0.1915	0.8563	0.5784	1.0432	0.9044
1.66	1.77	16.7	Q9BRJ2|RM45_HUMAN	39S ribosomal protein L45, mitochondrial precursor - Homo sapiens	1.12	0.2794	0.9783	0.8109	1.0217	0.8634
4.37	4.38	20.4	Q9H2W6|RM46_HUMAN	39S ribosomal protein L46, mitochondrial precursor - Homo sapiens	0.9847	0.8553	0.9896	0.938	0.8823	0.4707
4.99	5.43	34.9	Q9HD33|RM47_HUMAN	39S ribosomal protein L47, mitochondrial precursor - Homo sapiens	0.7589	0.0376	0.7787	0.0315	0.8078	0.3981
2.32	2.33	23.6	Q96GC5|RM48_HUMAN	39S ribosomal protein L48, mitochondrial precursor - Homo sapiens
7.15	7.26	41.9	Q9BYD2|RM09_HUMAN	39S ribosomal protein L9, mitochondrial precursor - Homo sapiens	0.9209	0.1859	1.0241	0.9271	0.8405	0.2133
9.25	9.27	50.2	Q99714|HCD2_HUMAN	3-hydroxyacyl-CoA dehydrogenase type-2 - Homo sapiens	1.0059	0.9019	0.8735	0.079	0.7339	0.0357
9.06	9.08	25.1	Q6NVY1|HIBCH_HUMAN	3-hydroxyisobutyryl-CoA hydrolase, mitochondrial precursor - Homo sapiens	0.9441	0.59	0.8442	0.0563	0.5711	0.001
32.61	32.64	52.9	P42765|THIM_HUMAN	3-ketoacyl-CoA thiolase, mitochondrial - Homo sapiens	0.9102	0.0124	0.8361	0.0001	0.6837	0
12.9	12.93	33.7	P09110|THIK_HUMAN	3-ketoacyl-CoA thiolase, peroxisomal precursor - Homo sapiens	1.0139	0.8939	0.8625	0.1394	0.817	0.0422
6.4	6.46	30.4	P62280|RS11_HUMAN	40S ribosomal protein S11 - Homo sapiens	1.0592	0.6042	1.7493	0.001	5.1605	0
2.48	2.55	37.9	Q76M58|Q76M58_HUMAN	40S ribosomal protein S12 - Homo sapiens	0.9066		0.6152		1.5885
4.95	4.95	34.4	P62277|RS13_HUMAN	40S ribosomal protein S13 - Homo sapiens	0.901	0.1987	1.2292	0.0115	2.0892	0
3.11	3.11	19.9	P62263|RS14_HUMAN	40S ribosomal protein S14 - Homo sapiens	1.3411	0.2104	1.9676	0.1345	4.8454	0.0181
2.09	2.15	32.4	P62841|RS15_HUMAN	40S ribosomal protein S15 - Homo sapiens	0.9808		1.3134	0.0569	3.1033	0.0169
5.52	5.52	28.5	P62244|RS15A_HUMAN	40S ribosomal protein S15a - Homo sapiens	1.27	0.1823	1.5898	0.0046	3.1228	0
4.48	4.48	43.2	P62249|RS16_HUMAN	40S ribosomal protein S16 - Homo sapiens	0.8882	0.2953	1.32	0.0285	2.471	0
6.05	6.17	46.1	P15880|RS2_HUMAN	40S ribosomal protein S2 - Homo sapiens	1.2026	0.2236	1.4361	0.0574	2.7036	0.0009
4.85	4.93	33.6	P60866|RS20_HUMAN	40S ribosomal protein S20 - Homo sapiens	1.7035		1.6329		4.627
5.65	5.67	28.7	P62266|RS23_HUMAN	40S ribosomal protein S23 - Homo sapiens	0.7311	0.425	1.1925	0.4947	1.9484	0.0587
2	2.01	22	Q7Z3D1|Q7Z3D1_HUMAN	40S ribosomal protein S24 - Homo sapiens
6.47	6.47	56.8	P62851|RS25_HUMAN	40S ribosomal protein S25 - Homo sapiens	0.8833	0.578	1.6802	0.0063	4.4151	0
3.77	3.77	41.7	Q71UM5|RS27L_HUMAN	40S ribosomal protein S27-like protein - Homo sapiens
9.07	9.13	39.9	P23396|RS3_HUMAN	40S ribosomal protein S3 - Homo sapiens	1.1153	0.2897	1.3185	0.1491	2.476	0.0204
3.06	3.06	16.2	P46782|RS5_HUMAN	40S ribosomal protein S5 - Homo sapiens	1.1168	0.5672	1.4249	0.0443	3.664	0
6.91	7.03	43.8	P46781|RS9_HUMAN	40S ribosomal protein S9 - Homo sapiens	1.0655	0.5532	1.4739	0.0004	2.8846	0
6.08	6.14	26.2	Q9BRK5|CAB45_HUMAN	45 kDa calcium-binding protein precursor - Homo sapiens	1.3997	0.0344	0.7904	0.1102	0.6655	0.0336
22.67	22.7	34.2	P08195|4F2_HUMAN	4F2 cell-surface antigen heavy chain - Homo sapiens	1.2996	0.0283	0.9782	0.7683	1.0474	0.4667
10.32	12.8	23.7	P49189|AL9A1_HUMAN	4-trimethylaminobutyraldehyde dehydrogenase - Homo sapiens	1.0383	0.5466	1.014	0.8224	0.8187	0.0929
68.6	68.86	61.8	P10809|CH60_HUMAN	60 kDa heat shock protein, mitochondrial precursor - Homo sapiens	0.8937	0.0003	0.9485	0.0527	0.8336	0
17.93	17.94	47	P05388|RLA0_HUMAN	60S acidic ribosomal protein P0 - Homo sapiens	0.8737	0.0648	1.1855	0.0247	1.5203	0.0012
10.73	10.75	53.3	P27635|RL10_HUMAN	60S ribosomal protein L10 - Homo sapiens	0.8949	0.257	1.4089	0.0115	2.3486	0.0003
6.91	7	44.7	P62906|RL10A_HUMAN	60S ribosomal protein L10a - Homo sapiens	0.9407	0.2801	1.0823	0.2495	1.4071	0
12.95	12.96	42.7	Q6NZ55|Q6NZ55_HUMAN	60S ribosomal protein L13 - Homo sapiens	1.2029		1.2691		2.3696
2	12.95	42.7	Q567Q8|Q567Q8_HUMAN	60S ribosomal protein L13 - Homo sapiens	0.6883		0.9816		1.2875
10.56	10.56	32.1	P18621|RL17_HUMAN	60S ribosomal protein L17 - Homo sapiens	0.8504	0.037	1.4217	0.0049	2.5342	0.0016
10.42	10.42	44.1	Q07020|RL18_HUMAN	60S ribosomal protein L18 - Homo sapiens	1.1314	0.3781	1.2025	0.1379	1.6391	0.0019
5.85	5.85	42.6	Q02543|RL18A_HUMAN	60S ribosomal protein L18a - Homo sapiens	1.092	0.3009	1.1295	0.2864	1.435	0.0144
4.28	4.31	34.7	P84098|RL19_HUMAN	60S ribosomal protein L19 - Homo sapiens	0.7374	0.0004	0.9053	0.0944	1.1693	0.0079
9.64	9.64	37.8	P62750|RL23A_HUMAN	60S ribosomal protein L23a - Homo sapiens	0.9384	0.6118	1.3547	0.0113	2.032	0.0002
7.25	7.27	32.5	P83731|RL24_HUMAN	60S ribosomal protein L24 - Homo sapiens	0.9476	0.6794	1.2545	0.2094	2.3125	0.0081
5.46	5.47	24.1	Q9UNX3|RL26L_HUMAN	60S ribosomal protein L26-like 1 - Homo sapiens	0.8631	0.6073	1.2254	0.1016	2.1984	0.0199
4.29	4.33	36	P61353|RL27_HUMAN	60S ribosomal protein L27 - Homo sapiens	1.0624	0.4253	1.0375	0.7005	1.4035	0.0086
8.56	8.59	47.4	P46779|RL28_HUMAN	60S ribosomal protein L28 - Homo sapiens	0.8446	0.074	1.3107	0.0018	2.1111	0
4.22	4.22	25.2	P62888|RL30_HUMAN	60S ribosomal protein L30 - Homo sapiens	1.0258	0.8084	1.0997	0.2716	1.4134	0.0097
6.66	6.67	52.8	P62899|RL31_HUMAN	60S ribosomal protein L31 - Homo sapiens	0.8088	0.0145	1.1624	0.1195	1.5118	0.0008
1.34	1.34	43.7	P62910|RL32_HUMAN	60S ribosomal protein L32 - Homo sapiens
7.52	7.53	35	P49207|RL34_HUMAN	60S ribosomal protein L34 - Homo sapiens	0.8738	0.4462	1.2066	0.2369	2.7608	0.0151
2.23	2.67	22.8	P42766|RL35_HUMAN	60S ribosomal protein L35 - Homo sapiens	0.7684	0.1216	1.4728	0.0772	2.7679	0.076
6.5	6.51	56.4	P18077|RL35A_HUMAN	60S ribosomal protein L35a - Homo sapiens	1.1465	0.1233	1.238	0.0074	1.5296	0
4.56	4.57	39	Q9Y3U8|RL36_HUMAN	60S ribosomal protein L36 - Homo sapiens	1.1139	0.3204	1.3272	0.0341	1.9185	0.0067
16.49	16.49	48.3	Q8N5Z7|Q8N5Z7_HUMAN	60S ribosomal protein L6 - Homo sapiens	0.9648	0.6297	1.1427	0.0751	1.2663	0.034
17.26	17.28	48.4	P18124|RL7_HUMAN	60S ribosomal protein L7 - Homo sapiens	0.8962	0.0362	0.9764	0.6438	1.264	0.0006
8.88	8.88	36.6	P62917|RL8_HUMAN	60S ribosomal protein L8 - Homo sapiens	0.9473	0.4492	1.128	0.0624	1.3963	0.0005
10	10.01	19.7	P17858|K6PL_HUMAN	6-phosphofructokinase, liver type - Homo sapiens	1.1521	0.5567	3.1831	0.0113	5.6699	0.0027
3.33	3.62	12.2	P52209|6PGD_HUMAN	6-phosphogluconate dehydrogenase, decarboxylating - Homo sapiens	1.18	0.3591	1.7994	0.0065	3.0271	0.0017
5.53	5.56	17.9	Q9UK67|Q9UK67_HUMAN	70 kDa SHP-1L protein - Homo sapiens	1.3357	0.3736	2.8451	0.0069	5.7508	0.0023
68.43	68.46	64.7	P11021|GRP78_HUMAN	78 kDa glucose-regulated protein precursor - Homo sapiens	0.9217	0.001	0.9959	0.8679	1.0041	0.8652
7.82	7.82	17.5	Q9UBM7|DHCR7_HUMAN	7-dehydrocholesterol reductase - Homo sapiens	1.0116	0.8974	1.1613	0.1124	1.0742	0.4579
12.6	12.78	27.7	Q96PT8|Q96PT8_HUMAN	ABC-transporter - Homo sapiens	0.9575	0.5142	1.1143	0.0656	1.2294	0.0029
5.48	5.52	20.3	Q9NUJ1|ABHDA_HUMAN	Abhydrolase domain-containing protein 10, mitochondrial precursor - Homo sapiens	0.7775	0.0074	0.8566	0.026	0.6828	0.0291
2.43	2.43	16.5	Q8NFV4|ABHDB_HUMAN	Abhydrolase domain-containing protein 11 - Homo sapiens	1.04	0.653	0.8908	0.4109	0.6864	0.0522
7.78	7.84	17.6	Q8N2K0|ABD12_HUMAN	Abhydrolase domain-containing protein 12 - Homo sapiens	0.9923	0.9754	1.1622	0.2118	1.5386	0.1189
1.78	1.85	8.2	P08910|ABHD2_HUMAN	Abhydrolase domain-containing protein 2 - Homo sapiens	0.7752	0.4315	0.4095	0.0284	0.5503	0.1124
9.41	9.41	20.4	A1L0T0|ILVBL_HUMAN	Acetolactate synthase-like protein - Homo sapiens	1.052	0.5911	1.2661	0.0212	1.4485	0.0033
19.6	19.64	43.6	P24752|THIL_HUMAN	Acetyl-CoA acetyltransferase, mitochondrial precursor - Homo sapiens	0.8311	0.0006	0.7632	0.0011	0.6593	0
1.99	2	16	Q9NUB1|ACS2L_HUMAN	Acetyl-coenzyme A synthetase 2-like, mitochondrial precursor - Homo sapiens
19.24	19.25	46.8	Q13510|ASAH1_HUMAN	Acid ceramidase precursor - Homo sapiens	1.0163	0.8892	1.0032	0.9848	0.8627	0.31
1.79	1.91	8.1	Q4LE36|Q4LE36_HUMAN	ACLY variant protein (Fragment) - Homo sapiens	1.0367		2.0502		6.4239	0.1002
44.55	44.69	46.2	Q99798|ACON_HUMAN	Aconitate hydratase, mitochondrial precursor - Homo sapiens	0.9711	0.4543	0.9401	0.1584	0.6588	0
2.14	2.22	33.1	Q2LE71|Q2LE71_HUMAN	Actin related protein 2/3 complex - Homo sapiens	2.322	0.0018	2.3073	0.006	4.7875	0.0001
84.12	84.12	78.3	Q96HG5|Q96HG5_HUMAN	Actin, beta (Fragment) - Homo sapiens	1.4403	0	1.8247	0	4.5273	0
8.83	9.06	14.4	Q1HE25|Q1HE25_HUMAN	Actinin alpha 1 isoform b - Homo sapiens	1.6827	0.003	1.2814	0.1042	2.0814	0.0004
7.62	7.88	33	P61160|ARP2_HUMAN	Actin-related protein 2 - Homo sapiens	2.0806	0.0014	1.8398	0.0018	3.4557	0
3.08	3.16	23.9	O15143|ARC1B_HUMAN	Actin-related protein 2/3 complex subunit 1B - Homo sapiens	1.8418	0.0001	1.8839	0.0002	4.1239	0.0001
3.87	3.9	44	P59998|ARPC4_HUMAN	Actin-related protein 2/3 complex subunit 4 - Homo sapiens	0.8373		0.8068		1.2867
3.1	3.12	41.7	O15511|ARPC5_HUMAN	Actin-related protein 2/3 complex subunit 5 - Homo sapiens	1.8198	0.0055	1.9306	0.0114	3.4805	0.0002
11.56	11.56	41.4	Q49SH3|Q49SH3_HUMAN	Activin receptor interacting protein 5 - Homo sapiens	0.9861	0.8959	0.8958	0.3488	0.8907	0.4957
4.93	4.94	39.1	O14561|ACPM_HUMAN	Acyl carrier protein, mitochondrial precursor - Homo sapiens	1.0511	0.6895	1.1372	0.2765	0.7394	0.013
22.11	22.16	43.8	Q9H845|ACAD9_HUMAN	Acyl-CoA dehydrogenase family member 9, mitochondrial precursor - Homo sapiens	0.8449	0.0103	0.8179	0.0051	0.7652	0.0011
4.77	4.82	18.9	Q96CM8|ACSF2_HUMAN	Acyl-CoA synthetase family member 2, mitochondrial precursor - Homo sapiens	1.2115	0.3037	1.2467	0.2943	1.0518	0.9
4.82	4.82	22	Q4G176|ACSF3_HUMAN	Acyl-CoA synthetase family member 3, mitochondrial precursor - Homo sapiens	1.1199	0.1984	0.8607	0.2205	0.7873	0.1915
22.98	22.98	40.7	Q5T4U5|Q5T4U5_HUMAN	Acyl-Coenzyme A dehydrogenase, C-4 to C-12 straight chain - Homo sapiens	0.8925	0.0202	0.8499	0.0004	0.7979	0.0001
5.62	5.63	16.4	Q5SQN6|Q5SQN6_HUMAN	Acyl-Coenzyme A dehydrogenase, short/branched chain - Homo sapiens	0.9565	0.8425	0.833	0.342	0.6615	0.0277
4.33	4.39	17.3	O15254|ACOX3_HUMAN	Acyl-coenzyme A oxidase 3, peroxisomal - Homo sapiens	0.9074	0.1739	0.8789	0.4102	0.7593	0.0029
17.12	17.13	34.7	Q9Y305|ACOT9_HUMAN	Acyl-coenzyme A thioesterase 9 - Homo sapiens	0.9959	0.959	1.2428	0.3414	0.8225	0.0626
12.59	12.61	35.1	Q53H12|AGK_HUMAN	Acylglycerol kinase, mitochondrial precursor - Homo sapiens	0.8534	0.052	0.8834	0.0603	0.7365	0.0165
1.84	1.88	13.5	O14672|ADA10_HUMAN	ADAM 10 precursor - Homo sapiens	0.9986	0.9898	0.6528	0.0516	0.7406	0.0565
4.57	4.58	29.4	P07741|APT_HUMAN	Adenine phosphoribosyltransferase - Homo sapiens	0.9888		4.6641	0.0089	11.0121	0.0003
3.76	3.76	19.9	Q8TB61|S35B2_HUMAN	Adenosine 3'-phospho 5'-phosphosulfate transporter 1 - Homo sapiens	0.5215	0.0062	0.6388	0.1724	0.841	0.6146
13.23	13.24	44	Q5EB54|Q5EB54_HUMAN	Adenylate kinase 2 - Homo sapiens	0.7977	0.0847	0.6261	0.0001	0.2544	0.0007
4.02	4.05	20.2	P27144|KAD4_HUMAN	Adenylate kinase isoenzyme 4, mitochondrial - Homo sapiens
2.05	2.17	24.1	Q5T0S2|Q5T0S2_HUMAN	Adenylyl cyclase-associated protein - Homo sapiens	1.2645	0.679	1.0006		2.1474	0.1078
15.04	15.04	32	Q9HDC9|APMAP_HUMAN	Adipocyte plasma membrane-associated protein - Homo sapiens	0.8832	0.0577	1.0526	0.3283	1.0993	0.176
8.99	34.65	55.4	Q59EI9|Q59EI9_HUMAN	ADP,ATP carrier protein, liver isoform T2 variant (Fragment) - Homo sapiens	0.8763	0.27	0.9749	0.7772	0.7353	0.0083
36.29	36.31	63.1	P05141|ADT2_HUMAN	ADP/ATP translocase 2 - Homo sapiens	0.9247	0.1582	0.8922	0.0425	0.7953	0.0007
4.01	4.06	16.3	Q9BRR6|ADPGK_HUMAN	ADP-dependent glucokinase - Homo sapiens	0.8089	0.4147	0.9272	0.6611	0.9015	0.4357
6.66	6.77	45.3	P61204|ARF3_HUMAN	ADP-ribosylation factor 3 - Homo sapiens	1.2058	0.4011	1.3039	0.0422	2.5784	0.0023
5.93	6.48	34.4	P18085|ARF4_HUMAN	ADP-ribosylation factor 4 - Homo sapiens	0.7666	0.1427	2.3763	0.1021	5.3962	0.0017
2.33	2.62	19.7	Q15041|AR6P1_HUMAN	ADP-ribosylation factor-like protein 6-interacting protein 1 - Homo sapiens	0.7713	0.0067	1.0893	0.265	1.0691	0.0012
2	6.45	42.5	Q96BM9|ARL8A_HUMAN	ADP-ribosylation factor-like protein 8A - Homo sapiens	1.3489	0.3512	1.6199	0.1102	1.5823	0.0639
7.48	7.53	44.6	Q9NVJ2|ARL8B_HUMAN	ADP-ribosylation factor-like protein 8B - Homo sapiens	1.0602	0.4406	1.2216	0.0237	1.091	0.2377
6.79	6.8	39.1	P10109|ADX_HUMAN	Adrenodoxin, mitochondrial precursor - Homo sapiens	0.778	0.0002	0.6052	0	0.4108	0
4.04	4.05	17.8	O43488|ARK72_HUMAN	Aflatoxin B1 aldehyde reductase member 2 - Homo sapiens	0.9402	0.8653	0.9426	0.6905	0.8463	0.2298
1.72	2.03	12.5	Q2TSD3|Q2TSD3_HUMAN	Aging-associated gene 6 protein - Homo sapiens	4.1986	0.4706	7.4904	0.442	11.6669	0.3425
13.2	13.43	17.2	Q5T567|Q5T567_HUMAN	Aldehyde dehydrogenase 18 family, member A1 - Homo sapiens	0.9555	0.5696	0.8615	0.1036	0.6925	0
3.11	7.13	24.6	P43353|AL3B1_HUMAN	Aldehyde dehydrogenase 3B1 - Homo sapiens	1.2608	0.1899	0.8258	0.4165	0.8837	0.4272
11.35	11.35	29	Q5JNV6|Q5JNV6_HUMAN	Aldehyde dehydrogenase 4 family, member A1 - Homo sapiens	0.9476	0.622	0.8905	0.3685	0.7456	0.0488
11.91	13.96	26.2	Q6I9T3|Q6I9T3_HUMAN	ALDH3A2 protein - Homo sapiens	0.9259	0.3118	1.1013	0.1333	1.0088	0.8886
21.78	21.79	33	O00116|ADAS_HUMAN	Alkyldihydroxyacetonephosphate synthase, peroxisomal precursor - Homo sapiens	1.0506	0.5133	0.9986	0.9823	0.8593	0.017
5.98	6.06	22	Q6NUM9|RETST_HUMAN	All-trans-retinol 13,14-reductase precursor - Homo sapiens	0.9062	0.4042	0.6648	0.5515	0.5738	0.3796
3.82	5.75	29.4	Q14455|Q14455_HUMAN	Alpha subunit of GsGTP binding protein (Fragment) - Homo sapiens	1.0922	0.6031	0.7712	0.2112	0.9904	0.9299
5.93	5.93	13.9	Q10469|MGAT2_HUMAN	Alpha-1,6-mannosyl-glycoprotein 2-beta-N-acetylglucosaminyltransferase - Homo sapiens	1.1129	0.6613	0.7149	0.1008	0.6407	0.0267
2.03	2.05	17.2	P02765|FETUA_HUMAN	Alpha-2-HS-glycoprotein precursor - Homo sapiens	1.3038	0.4068	1.3708	0.3741	2.2402	0.2044
2.38	2.53	8.4	P01023|A2MG_HUMAN	Alpha-2-macroglobulin precursor - Homo sapiens	0.8734	0.2215	0.5839	0.3094	0.8851	0.7355
18.96	18.97	58.5	P30533|AMRP_HUMAN	Alpha-2-macroglobulin receptor-associated protein precursor - Homo sapiens	1.0288	0.579	0.9365	0.1712	0.9168	0.0763
4.03	4.07	21.8	Q6LER7|Q6LER7_HUMAN	Alpha-galactosidase A (Fragment) - Homo sapiens	1.0389	0.3839	1.1997	0.0998	1.0327	0.7313
21.47	21.48	51.2	Q7LDY7|Q7LDY7_HUMAN	Alpha-KG-E2 - Homo sapiens	0.9682	0.6956	0.8755	0.0243	0.7708	0.0001
2.02	2.06	8.1	P35475|IDUA_HUMAN	Alpha-L-iduronidase precursor - Homo sapiens	1.3564		0.7735		1.6432
8.08	8.29	14.9	Q16706|MA2A1_HUMAN	Alpha-mannosidase 2 - Homo sapiens	1.1253	0.06	0.4545	0.0002	0.6415	0.0099
4.04	4.09	15.6	P17050|NAGAB_HUMAN	Alpha-N-acetylgalactosaminidase precursor - Homo sapiens	1.4761	0.0183	1.8854	0.0028	1.4905	0.0298
2.89	2.93	8.1	Q14769|Q14769_HUMAN	Alpha-N-acetylglucosaminidase - Homo sapiens	1.3319	0.5782	1.71	0.1971	1.3841	0.3538
8.44	8.46	23.7	P54920|SNAA_HUMAN	Alpha-soluble NSF attachment protein - Homo sapiens	0.8804	0.1037	1.0107	0.8966	0.8331	0.026
3.7	3.73	20.8	Q9BW99|Q9BW99_HUMAN	Amplified in osteosarcoma - Homo sapiens	0.8271	0.2411	0.7869	0.1081	0.9483	0.7555
1.86	1.87	8.8	Q06481|APLP2_HUMAN	Amyloid-like protein 2 precursor - Homo sapiens	0.7291		0.3278		0.4543
14.96	15.02	18.5	P12821|ACE_HUMAN	Angiotensin-converting enzyme, somatic isoform precursor - Homo sapiens	1.3499	0.0017	1.0619	0.4153	1.1002	0.3978
5.66	5.78	13.5	Q59GF1|Q59GF1_HUMAN	Anion exchanger 2 type a variant (Fragment) - Homo sapiens	1.2137	0.2401	0.8673	0.4803	0.9759	0.8123
1.8	1.85	5	Q92625|ANS1A_HUMAN	Ankyrin repeat and SAM domain-containing protein 1A - Homo sapiens
25.41	25.42	56.9	Q5TZZ9|Q5TZZ9_HUMAN	Annexin A1 - Homo sapiens	1.9472	0	2.7781	0	5.4462	0
20.82	20.83	42	Q5T0G8|Q5T0G8_HUMAN	Annexin A11 - Homo sapiens	1.3098	0.0002	1.0781	0.3045	1.4656	0.0001
39.52	39.53	71.1	P07355|ANXA2_HUMAN	Annexin A2 - Homo sapiens	1.5341	0	1.4969	0	2.5231	0
1.59	1.87	17.8	Q5T0M7|Q5T0M7_HUMAN	Annexin A7 - Homo sapiens	1.3112		1.2731		1.9706
9.38	11.72	30.1	Q6P452|Q6P452_HUMAN	ANXA4 protein - Homo sapiens	1.2243	0.0146	1.1957	0.005	1.3663	0.0036
19.92	21.04	55	Q6FHB3|Q6FHB3_HUMAN	ANXA5 protein (Fragment) - Homo sapiens	2.4239	0	3.2597	0	6.4016	0
2	10.38	23.2	Q86X54|Q86X54_HUMAN	AP1B1 protein - Homo sapiens	1.0265	0.9462	0.8083	0.4224	0.8462	0.5459
12.22	12.3	29.4	O95782|AP2A1_HUMAN	AP-2 complex subunit alpha-1 - Homo sapiens	0.9862	0.8717	0.6165	0	0.6713	0.0068
13.88	13.98	32.9	Q96CW1|AP2M1_HUMAN	AP-2 complex subunit mu-1 - Homo sapiens	1.1225	0.0645	0.6248	0	0.5892	0
1.57	1.61	29	P02652|APOA2_HUMAN	Apolipoprotein A-II precursor - Homo sapiens	0.9253	0.3863	1.2117	0.4261	2.5937	0.0007
6.15	6.15	42.2	P02654|APOC1_HUMAN	Apolipoprotein C-I precursor - Homo sapiens	0.988	0.9563	0.7216	0.4478	0.993	0.99
18.67	18.82	57.4	P02649|APOE_HUMAN	Apolipoprotein E precursor - Homo sapiens	0.761	0.0002	0.2599	0	0.3036	0
4.05	4.13	22.2	Q9BUR5|APOO_HUMAN	Apolipoprotein O precursor - Homo sapiens
1.41	1.44	12.3	Q6UXV4|APOOL_HUMAN	Apolipoprotein O-like precursor - Homo sapiens	0.973	0.8018	1.0747	0.6578	0.8865	0.3857
16.48	16.49	46.3	Q9BQE5|APOL2_HUMAN	Apolipoprotein-L2 - Homo sapiens	0.9056	0.2629	1.1874	0.0527	1.5639	0.0001
1.4	1.4	10.3	Q9ULZ3|ASC_HUMAN	Apoptosis-associated speck-like protein containing a CARD - Homo sapiens
18.06	18.06	33.1	O95831|AIFM1_HUMAN	Apoptosis-inducing factor 1, mitochondrial precursor - Homo sapiens	0.8446	0.0285	0.923	0.1561	0.6689	0
4.05	4.07	14.2	P09917|LOX5_HUMAN	Arachidonate 5-lipoxygenase - Homo sapiens	1.0907	0.4382	1.2092	0.095	1.6317	0.0052
2.68	2.68	14.9	P20292|AL5AP_HUMAN	Arachidonate 5-lipoxygenase-activating protein - Homo sapiens	1.1264	0.2706	1.2878	0.0467	1.2436	0.085
2.47	2.54	8.2	Q14161|GIT2_HUMAN	ARF GTPase-activating protein GIT2 - Homo sapiens	0.9943		1.4224		2.6382
2	2.54	9.7	Q6FH17|Q6FH17_HUMAN	ARF6 protein - Homo sapiens
2.05	2.88	16.8	P54136|SYRC_HUMAN	Arginyl-tRNA synthetase, cytoplasmic - Homo sapiens					16.9623
5.49	7.55	48.2	Q6ICQ8|Q6ICQ8_HUMAN	ARHG protein (Fragment) - Homo sapiens	1.1019	0.2461	1.0499	0.6157	1.2176	0.0636
2.38	2.39	20.1	Q59FV6|Q59FV6_HUMAN	ARP3 actin-related protein 3 homolog variant (Fragment) - Homo sapiens	1.4159	0.1332	1.2402	0.156	1.393	0.3326
19.1	19.13	42.4	Q6PIU2|ADCL1_HUMAN	Arylacetamide deacetylase-like 1 - Homo sapiens	0.9669	0.3903	1.0955	0.0215	1.0075	0.8465
5.01	5.02	12	P15848|ARSB_HUMAN	Arylsulfatase B precursor - Homo sapiens	1.1978	0.1843	1.6218	0.0039	1.144	0.1723
28.18	28.2	51.6	P00505|AATM_HUMAN	Aspartate aminotransferase, mitochondrial precursor - Homo sapiens	0.9258	0.2531	0.8173	0.001	0.6001	0
15.68	15.76	22.7	Q12797|ASPH_HUMAN	Aspartyl/asparaginyl beta-hydroxylase - Homo sapiens	0.9795	0.7806	1.0209	0.7672	0.955	0.5163
9.64	9.95	22.4	Q6DD88|ATLA3_HUMAN	Atlastin-3 - Homo sapiens	1.0207	0.8354	1.3089	0.0053	1.4368	0.0001
2.11	2.11	13.7	A6YWX8|A6YWX8_HUMAN	ATP synthase F0 subunit 6 - Homo sapiens	1.0044	0.9617	1.0789	0.4165	0.7085	0.0714
16.6	17.76	56	Q8TAS0|Q8TAS0_HUMAN	ATP synthase gamma chain (Fragment) - Homo sapiens	0.7005	0	0.8519	0.0043	0.7794	0
2.01	2.04	10.7	Q8N5M1|ATPF2_HUMAN	ATP synthase mitochondrial F1 complex assembly factor 2, mitochondrial precursor - Homo sapiens
2.02	2.02	41.2	A0S8D6|A0S8D6_HUMAN	ATP synthase protein 8 - Homo sapiens
75.86	75.88	72.2	P25705|ATPA_HUMAN	ATP synthase subunit alpha, mitochondrial precursor - Homo sapiens	1.0021	0.9397	0.9733	0.2692	0.8379	0
70.98	70.98	78.3	P06576|ATPB_HUMAN	ATP synthase subunit beta, mitochondrial precursor - Homo sapiens	0.9848	0.6677	0.954	0.0962	0.8011	0
10.93	10.99	51.6	O75947|ATP5H_HUMAN	ATP synthase subunit d, mitochondrial - Homo sapiens	0.9315	0.1156	0.9354	0.1156	0.7907	0
8.59	8.59	52.2	P56385|ATP5I_HUMAN	ATP synthase subunit e, mitochondrial - Homo sapiens	1.0596	0.506	0.9992	0.9946	0.8923	0.2385
13.12	13.12	73.8	O75964|ATP5L_HUMAN	ATP synthase subunit g, mitochondrial - Homo sapiens	0.9048	0.1799	0.8929	0.2555	0.8059	0.0088
27.92	27.97	74.2	P48047|ATPO_HUMAN	ATP synthase subunit O, mitochondrial precursor - Homo sapiens	0.961	0.4297	0.9378	0.295	0.8155	0.002
6.15	6.16	60.2	Q6NZ59|Q6NZ59_HUMAN	ATP synthase, H+ transporting, mitochondrial F0 complex, subunit F6 - Homo sapiens	0.8799	0.1074	0.8529	0.0272	0.6994	0.0012
2.15	2.19	22.4	Q6LEU2|Q6LEU2_HUMAN	ATP1B1 protein (Fragment) - Homo sapiens	1.7345	0.0044	1.3007	0.0418	1.3168	0.104
10.18	10.23	42.3	Q6FG90|Q6FG90_HUMAN	ATP5D protein - Homo sapiens	0.9598	0.7332	0.9326	0.3807	0.7021	0.0003
2	2.01	12	Q6LEU9|Q6LEU9_HUMAN	ATP5G3 protein (Fragment) - Homo sapiens	0.6606	0	0.8364	0.0121	0.8451	0.0495
7.53	7.54	39.8	Q6IB33|Q6IB33_HUMAN	ATP6V1G1 protein - Homo sapiens	1.4762	0.0039	1.9937	0.0001	1.7145	0.0003
3.01	3.12	15.2	Q8NBU5|ATAD1_HUMAN	ATPase family AAA domain-containing protein 1 - Homo sapiens	0.75	0.2975	0.7837	0.6469	0.6535	0.5596
25.23	25.25	45.4	Q9NVI7|ATD3A_HUMAN	ATPase family AAA domain-containing protein 3A - Homo sapiens	0.9396	0.2939	0.9494	0.3098	0.8151	0.0058
3.53	3.55	38.7	Q9UII2|ATIF1_HUMAN	ATPase inhibitor, mitochondrial precursor - Homo sapiens	0.8662	0.0642	0.8744	0.0256	0.7537	0.0002
4.3	11.45	21.7	B1APW6|B1APW6_HUMAN	ATPase, Ca++ transporting, plasma membrane 4 - Homo sapiens	4.7923		3.5846
21.65	21.67	54.9	Q53Y06|Q53Y06_HUMAN	ATPase, H+ transporting, lysosomal 31kDa, V1 subunit E isoform 1 - Homo sapiens	1.3122	0.0355	1.8243	0	1.6833	0
3.58	3.69	18.7	Q9NRK6|ABCBA_HUMAN	ATP-binding cassette sub-family B member 10, mitochondrial precursor - Homo sapiens	1.2406	0.6773	1.0866	0.6108	1.0884	0.6119
5.38	6.4	23.4	O75027|ABCB7_HUMAN	ATP-binding cassette sub-family B member 7, mitochondrial precursor - Homo sapiens	1.1545	0.2926	1.2049	0.0565	1.1978	0.151
2.89	2.95	16.7	Q9NUT2|ABCB8_HUMAN	ATP-binding cassette sub-family B member 8, mitochondrial precursor - Homo sapiens	1.1316	0.5522	0.7958	0.0663	0.903	0.5674
12.03	12.13	21.5	P33897|ABCD1_HUMAN	ATP-binding cassette sub-family D member 1 - Homo sapiens	1.0263	0.7955	0.911	0.3381	0.8102	0.0886
6.49	6.55	26.3	P28288|ABCD3_HUMAN	ATP-binding cassette sub-family D member 3 - Homo sapiens	1.1077	0.1875	1.0439	0.5797	0.9822	0.8486
1.83	1.85	6.7	P61221|ABCE1_HUMAN	ATP-binding cassette sub-family E member 1 - Homo sapiens	0.6162				2.8102
4.96	5.08	22	O76031|CLPX_HUMAN	ATP-dependent Clp protease ATP-binding subunit clpX-like, mitochondrial precursor - Homo sapiens	0.9209	0.5557	0.665	0.1445	0.5702	0.1183
6.47	6.52	17.2	Q96TA2|YMEL1_HUMAN	ATP-dependent metalloprotease YME1L1 - Homo sapiens	0.8342	0.0216	0.848	0.0687	0.9368	0.4456
6.02	6.02	44.5	Q6IAT8|Q6IAT8_HUMAN	B2M protein - Homo sapiens	1.0815	0.1704	1.0481	0.49	1.0407	0.6263
2.48	2.56	24	Q9NYG7|Q9NYG7_HUMAN	Bax-sigma - Homo sapiens	1.7154	0.0106	3.3784	0.0054	4.4007	0.0004
18.44	18.47	48.4	Q53G72|Q53G72_HUMAN	B-cell receptor-associated protein 31 variant (Fragment) - Homo sapiens	0.8996	0.038	0.8194	0.0001	0.6084	0
5.72	5.72	18.2	Q96G95|Q96G95_HUMAN	BCKDK protein - Homo sapiens	0.8526	0.4414	0.8815	0.5226	0.7722	0.0947
4.01	4.01	14.9	Q96LW7|BINCA_HUMAN	Bcl10-interacting CARD protein - Homo sapiens	0.9526	0.6403	0.7118	0.0174	0.488	0.0076
3.84	3.88	8.7	Q9BXK5|B2L13_HUMAN	Bcl-2-like 13 protein - Homo sapiens	1.0796	0.5809	1.0149	0.9328	1.1024	0.4448
9.66	9.66	21.4	P02749|APOH_HUMAN	Beta-2-glycoprotein 1 precursor - Homo sapiens	1.1922	0.0127	1.8485	0	3.1455	0
5.75	6.04	21	Q53G40|Q53G40_HUMAN	Beta-galactosidase (Fragment) - Homo sapiens	1.1673	0.0693	1.5824	0.0031	1.2674	0.0254
4.49	4.53	14.6	P08236|BGLR_HUMAN	Beta-glucuronidase precursor - Homo sapiens	1.0132	0.8459	1.2561	0.0061	1.1615	0.0216
13.78	13.79	30	P07686|HEXB_HUMAN	Beta-hexosaminidase beta chain precursor - Homo sapiens	1.1113	0.1522	1.3216	0.0034	1.0503	0.5274
1.83	2.02	23.3	Q53H82|LACB2_HUMAN	Beta-lactamase-like protein 2 - Homo sapiens	1.0496		1.6473		3.1527
4.27	4.45	15.3	P07814|SYEP_HUMAN	Bifunctional aminoacyl-tRNA synthetase - Homo sapiens	1.4616	0.0639	1.8929	0.0272	4.2803	0.0006
9.46	9.48	31.4	P13995|MTDC_HUMAN	Bifunctional methylenetetrahydrofolate dehydrogenase/cyclohydrolase, mitochondrial precursor - Homo sapiens	0.9563	0.4307	0.9585	0.5422	0.8563	0.2454
2.11	2.12	23.4	Q53S33|BOLA3_HUMAN	BolA-like protein 3 - Homo sapiens	0.9633	0.841	0.8265	0.2684	0.6465	0.0783
2	2.01	12.8	Q10589|BST2_HUMAN	Bone marrow stromal antigen 2 precursor - Homo sapiens	1.0811	0.2268	0.7152	0.021	0.7288	0.0828
4.02	4.04	16.7	P80723|BASP_HUMAN	Brain acid soluble protein 1 - Homo sapiens	1.3047	0.3456	1.6092	0.389	1.7676	0.0998
1.96	1.96	20.5	O95563|BR44_HUMAN	Brain protein 44 - Homo sapiens	0.8697	0.2925	0.8032	0.0701	0.6882	0.0569
2.81	2.81	23.9	Q9Y5U8|BR44L_HUMAN	Brain protein 44-like protein - Homo sapiens	0.953	0.4722	1.0493	0.6706	0.828	0.1318
1.79	1.79	14.6	Q59EI3|Q59EI3_HUMAN	Branched chain keto acid dehydrogenase E1, alpha polypeptide variant (Fragment) - Homo sapiens
2.33	2.35	20.7	O15382|BCAT2_HUMAN	Branched-chain-amino-acid aminotransferase, mitochondrial precursor - Homo sapiens	0.8238	0.5017	0.807	0.5756	0.6303	0.1546
2.72	2.72	17.5	Q8WY22|BRI3B_HUMAN	BRI3-binding protein - Homo sapiens	1.0308	0.8782	1.0425	0.7643	1.0759	0.8927
2.07	2.08	13.3	Q96BF6|BTBDE_HUMAN	BTB/POZ domain-containing protein 14A - Homo sapiens
3.22	3.23	9.5	Q96CX2|KCD12_HUMAN	BTB/POZ domain-containing protein KCTD12 - Homo sapiens
1.52	1.53	30.4	Q49AP7|Q49AP7_HUMAN	C1orf212 protein - Homo sapiens
15.59	15.61	24	Q6UB35|Q6UB35_HUMAN	C1-tetrahydrofolate synthase - Homo sapiens	0.934	0.0723	1.0695	0.267	0.9601	0.7145
4.05	4.08	15.4	P21730|C5AR_HUMAN	C5a anaphylatoxin chemotactic receptor - Homo sapiens	1.1621	0.5003	0.8742	0.2316	1.2252	0.3205
9.87	10.07	22.7	O75844|FACE1_HUMAN	CAAX prenyl protease 1 homolog - Homo sapiens	0.9178	0.3597	1.1523	0.2334	1.0725	0.4515
3.91	3.94	22.1	Q9BPX6|CBAA1_HUMAN	Calcium-binding atopy-related autoantigen 1 - Homo sapiens	0.7602	0.0189	0.7273	0.0113	0.6324	0.0355
20.97	21.15	34.4	Q9UJS0|CMC2_HUMAN	Calcium-binding mitochondrial carrier protein Aralar2 - Homo sapiens	1.0706	0.4783	0.9337	0.423	0.8526	0.0049
27.88	27.9	50.1	Q6NUK1|SCMC1_HUMAN	Calcium-binding mitochondrial carrier protein SCaMC-1 - Homo sapiens	0.9549	0.3612	1.0905	0.1	0.9769	0.725
4.06	4.1	22.2	Q6KCM7|SCMC2_HUMAN	Calcium-binding mitochondrial carrier protein SCaMC-2 - Homo sapiens	0.9482	0.506	0.9659	0.731	0.9931	0.9611
13.64	13.64	48.7	Q99653|CHP1_HUMAN	Calcium-binding protein p22 - Homo sapiens	0.9281	0.4734	0.9952	0.9468	1.0837	0.4027
2.4	3.33	14.8	Q9NP80|PLPL8_HUMAN	Calcium-independent phospholipase A2-gamma - Homo sapiens	0.9596	0.2799	0.4893	0.2215	0.6639	0.1041
3.73	3.86	13.8	P98194|AT2C1_HUMAN	Calcium-transporting ATPase type 2C member 1 - Homo sapiens
9.1	9.11	34	Q9BRL5|Q9BRL5_HUMAN	CALM3 protein - Homo sapiens	1.5005	0.0013	1.1439	0.1151	0.9415	0.37
39.66	39.68	45.9	P27824|CALX_HUMAN	Calnexin precursor - Homo sapiens	0.9148	0.0069	1.0545	0.1983	1.0938	0.0573
24.27	24.27	45.6	Q6IAT4|Q6IAT4_HUMAN	CALR protein - Homo sapiens	0.8497	0.0001	0.9583	0.3935	0.8785	0.0014
11.83	11.86	34.3	Q6IAW5|Q6IAW5_HUMAN	CALU protein - Homo sapiens	1.1149	0.3269	0.9663	0.7855	0.915	0.3879
1.35	1.45	17.7	P17612|KAPCA_HUMAN	cAMP-dependent protein kinase catalytic subunit alpha - Homo sapiens
4.04	4.06	19.2	Q53GE2|Q53GE2_HUMAN	Capping protein (Actin filament) muscle Z-line, alpha 2 variant (Fragment) - Homo sapiens	1.4842	0.0022	1.2365	0.0867	2.1597	0
7.28	7.42	26.1	Q32Q68|Q32Q68_HUMAN	Capping protein (Actin filament) muscle Z-line, beta - Homo sapiens	1.2721	0.0177	1.1601	0.0812	1.8837	0.0001
9.32	9.34	15.1	P14384|CBPM_HUMAN	Carboxypeptidase M precursor - Homo sapiens	1.1399	0.1323	0.8641	0.1123	0.8854	0.1486
1.47	1.58	10.4	Q5T952|Q5T952_HUMAN	Carnitine acetyltransferase - Homo sapiens	1.0252	0.9338	1.0402	0.725	0.6691	0.0732
32.49	32.51	47.4	P23786|CPT2_HUMAN	Carnitine O-palmitoyltransferase 2, mitochondrial precursor - Homo sapiens	1.0111	0.8421	0.9557	0.4263	0.8602	0.0174
18.85	18.86	26.5	P50416|CPT1A_HUMAN	Carnitine O-palmitoyltransferase I, liver isoform - Homo sapiens	1.0637	0.1756	1.0738	0.2569	0.9685	0.6694
2.03	2.49	8.8	Q92523|CPT1B_HUMAN	Carnitine O-palmitoyltransferase I, muscle isoform - Homo sapiens	0.7807		0.8733		1.2979
7.77	8.12	23.1	Q59EV6|Q59EV6_HUMAN	Carrier family 6 , member 8 variant (Fragment) - Homo sapiens	1.2441	0.0222	1.4258	0.0038	1.0598	0.4055
13.63	13.7	29.7	Q9H078|CLPB_HUMAN	Caseinolytic peptidase B protein homolog - Homo sapiens	0.8777	0.0033	0.6095	0	0.4705	0
16.95	17	38.9	Q9NZK5|CECR1_HUMAN	Cat eye syndrome critical region protein 1 precursor - Homo sapiens	1.0738	0.6031	1.2964	0.0349	1.186	0.0406
4.22	4.23	17.7	Q9BXW7|CECR5_HUMAN	Cat eye syndrome critical region protein 5 precursor - Homo sapiens	0.9348	0.7408	1.0421	0.6633	0.7353	0.2583
27.17	27.19	38.7	P04040|CATA_HUMAN	Catalase - Homo sapiens	0.9463	0.2468	0.9464	0.1722	0.7539	0
7.31	7.31	20.7	P21964|COMT_HUMAN	Catechol O-methyltransferase - Homo sapiens	0.8191	0.0598	1.0653	0.5044	0.9732	0.8006
2	2.03	9.2	Q86VU5|CMTD1_HUMAN	Catechol-O-methyltransferase domain-containing protein 1 - Homo sapiens	0.9515	0.596	0.7575	0.492	1.0556	0.4706
4.78	5.07	25.3	P49913|CAMP_HUMAN	Cathelicidin antimicrobial peptide precursor - Homo sapiens	1.0379	0.525	0.8157	0.077	1.3459	0.0005
25.52	25.52	49.9	P07858|CATB_HUMAN	Cathepsin B precursor - Homo sapiens	0.9693	0.6704	0.9961	0.9708	0.7639	0.0126
26.35	26.38	43.9	P07339|CATD_HUMAN	Cathepsin D precursor - Homo sapiens	0.9129	0.0268	0.8041	0.0001	0.6559	0
7.81	7.84	25.7	Q96NY6|Q96NY6_HUMAN	Cathepsin H - Homo sapiens	0.9534	0.6126	1.2203	0.1922	0.9537	0.6804
3.25	3.4	14.1	P07711|CATL1_HUMAN	Cathepsin L1 precursor - Homo sapiens	0.9864	0.8075	1.4929	0.0055	1.2	0.0918
9.24	9.25	31	Q9UBR2|CATZ_HUMAN	Cathepsin Z precursor - Homo sapiens	0.9472	0.4561	0.7724	0.0801	0.6653	0.0008
8.64	8.65	16.6	Q9BYI0|Q9BYI0_HUMAN	Cation chloride cotransporter 6 - Homo sapiens	1.088	0.2864	0.9114	0.286	1.0705	0.4917
14.68	14.74	14.2	P11717|MPRI_HUMAN	Cation-independent mannose-6-phosphate receptor precursor - Homo sapiens	0.9802	0.7958	0.7005	0.001	0.8088	0.292
15.77	15.77	37.9	Q53XT5|Q53XT5_HUMAN	CD14 antigen - Homo sapiens	1.38	0	0.4401	0	0.3608	0
8.58	8.6	18.2	Q13740|CD166_HUMAN	CD166 antigen precursor - Homo sapiens	1.2457	0.0175	0.9196	0.3303	0.9335	0.45
2	2.06	23.4	Q2TB19|Q2TB19_HUMAN	CD209 protein - Homo sapiens	1.1019		0.8575		0.8564
4.55	4.55	15.7	Q5ZPR3|CD276_HUMAN	CD276 antigen precursor - Homo sapiens	1.211	0.104	0.8942	0.4538	1.0411	0.7441
20.13	20.13	18.6	Q9H5A5|Q9H5A5_HUMAN	CD44 molecule (Fragment) - Homo sapiens	1.2544	0.0001	1.1444	0.0176	1.7397	0
2.12	2.13	17.9	Q9BRW0|Q9BRW0_HUMAN	CD58 protein - Homo sapiens	1.2768	0.1239	1.1033	0.3578	1.1735	0.1772
4	4.01	21.1	Q6FHM9|Q6FHM9_HUMAN	CD59 protein - Homo sapiens	1.2123	0.4909	0.7843	0.2796	0.8036	0.1341
4.52	4.56	20.2	P21926|CD9_HUMAN	CD9 antigen - Homo sapiens	1.4389	0.0083	0.9543	0.6424	1.1899	0.2387
4.01	4.03	21.1	Q6ICV7|Q6ICV7_HUMAN	CD99 protein (Fragment) - Homo sapiens
9.87	9.89	57.8	Q8N5K1|CISD2_HUMAN	CDGSH iron sulfur domain-containing protein 2 - Homo sapiens	0.9712	0.7852	0.9945	0.9599	1.0288	0.8331
4.11	4.34	20.2	Q96JB5|CK5P3_HUMAN	CDK5 regulatory subunit-associated protein 3 - Homo sapiens	0.7209	0.0323	1.0442	0.4866	1.4684	0.0244
2.01	2.04	12.9	Q6ZP37|Q6ZP37_HUMAN	CDNA FLJ26554 fis, clone LNF01773, highly similar to Galactokinase - Homo sapiens	0.8786	0.4807	0.995	0.9941	1.9345	0.6394
7.82	7.87	16.2	Q96ND2|Q96ND2_HUMAN	cDNA FLJ31051 fis, clone HSYRA2000605, weakly similar to MYOSIN HEAVY CHAIN, CLONE 203 - Homo sapiens	1.016	0.9469	1.1445	0.7163	1.1802	0.4583
2.01	2.08	15.5	Q8NB01|Q8NB01_HUMAN	cDNA FLJ34453 fis, clone HLUNG2002429, highly similar to Homo sapiens cartilage-associated protein - Homo sapiens	0.5437		0.9948		0.6549
1.49	1.6	16.9	Q8NAA8|Q8NAA8_HUMAN	cDNA FLJ35689 fis, clone SPLEN2019379, highly similar to INTERFERON-REGULATED RESISTANCE GTP-BINDING PROTEIN MXA - Homo sapiens	1.7553		4.8426	0.0026	11.5177	0.0025
2.46	2.48	11.2	Q6ZUY8|Q6ZUY8_HUMAN	cDNA FLJ43203 fis, clone FEBRA2008468, highly similar to LYSOSOMAL ACID LIPASE/CHOLESTERYL ESTER HYDROLASE - Homo sapiens	0.6431	0.0162	0.5257	0.0195	0.6005	0.4414
4.92	4.94	26.4	Q6ZS74|Q6ZS74_HUMAN	cDNA FLJ45773 fis, clone NETRP2003448, highly similar to Ras-related protein RAL-B - Homo sapiens	1.8057	0.2107	1.4956	0.0431	1.8189	0.0828
2	3.43	21.1	Q6ZRR8|Q6ZRR8_HUMAN	cDNA FLJ46155 fis, clone TESTI4001517, moderately similar to Keratin, type I cytoskeletal 18 - Homo sapiens	0.6966	0.546	0.936	0.828	3.3824	0.1431
2.3	2.48	25.5	A8K781|A8K781_HUMAN	cDNA FLJ75299, highly similar to Xenopus laevis proteasome (prosome, macropain) 26S subunit, ATPase 3, mRNA - Homo sapiens					9999
3.03	3.08	23.4	A8K651|A8K651_HUMAN	cDNA FLJ75700, highly similar to Homo sapiens complement component 1, q subcomponent binding protein (C1QBP), nuclear gene encoding mitochondrial protein, mRNA - Homo sapiens	0.9351	0.756	0.6512	0.2484	0.7011	0.255
4.32	4.41	17.3	A8K693|A8K693_HUMAN	cDNA FLJ75713, highly similar to Homo sapiens kynurenine 3-monooxygenase - Homo sapiens	1.0129	0.9048	0.9289	0.4144	0.9335	0.6209
2	45.87	47	A8K6Q8|A8K6Q8_HUMAN	cDNA FLJ75881, highly similar to Homo sapiens transferrin receptor - Homo sapiens	1.0974	0.6836	0.681	0.2178	0.616	0.1421
4.36	4.55	18.6	A8K6X8|A8K6X8_HUMAN	cDNA FLJ75886, highly similar to Homo sapiens acyl-Coenzyme A oxidase 1, palmitoyl (ACOX1), transcript variant 1, mRNA - Homo sapiens	1.0028	0.972	0.9027	0.3181	0.7927	0.003
3.39	3.41	17.2	A8K413|A8K413_HUMAN	cDNA FLJ76144, highly similar to Homo sapiens NADH dehydrogenase (ubiquinone) 1 alpha subcomplex, 10, 42kDa (NDUFA10), mRNA - Homo sapiens	0.9499	0.6692	0.9329	0.4332	0.7059	0.0139
7.52	7.77	20.8	A8K4A8|A8K4A8_HUMAN	cDNA FLJ76156, highly similar to Homo sapiens aspartyl-tRNA synthetase 2 (DARS2), mRNA - Homo sapiens	0.9926	0.9145	0.932	0.2917	0.8591	0.021
2.57	2.57	33.9	A8K2X0|A8K2X0_HUMAN	cDNA FLJ76536, highly similar to Homo sapiens TYRO protein tyrosine kinase binding protein (TYROBP), transcript variant 2, mRNA - Homo sapiens	1.0325	0.6645	1.0459	0.7575	0.9319	0.6071
2.02	4.09	19.7	A8K525|A8K525_HUMAN	cDNA FLJ76817, highly similar to Homo sapiens non-POU domain containing, octamer-binding (NONO), mRNA - Homo sapiens	0.628	0.2326	0.992	0.9592	2.6363	0.1238
2	2	9.9	A8K544|A8K544_HUMAN	cDNA FLJ76820 - Homo sapiens	0.988		0.9968		0.6431
1.36	1.37	23.6	A8K5R6|A8K5R6_HUMAN	cDNA FLJ77138, highly similar to Homo sapiens golgi SNAP receptor complex member 1 (GOSR1), transcript variant 1, mRNA - Homo sapiens	1.2116	0.3092	0.8209	0.1515	0.8895	0.5105
2	5.58	12.8	A8K6W1|A8K6W1_HUMAN	cDNA FLJ77470, highly similar to Homo sapiens egf-like module containing, mucin-like, hormone receptor-like 2 (EMR2), transcript variant 1, mRNA - Homo sapiens
4	4.04	13.9	A8K813|A8K813_HUMAN	cDNA FLJ77763, highly similar to Homo sapiens prolactin regulatory element binding (PREB), mRNA - Homo sapiens	1.7704	0.1265	1.5201		1.3648
7.98	7.98	50.5	A8K0V6|A8K0V6_HUMAN	cDNA FLJ78321 - Homo sapiens	1.1485	0.0427	1.0009	0.9878	0.94	0.7381
1.52	1.52	11.9	A8K109|A8K109_HUMAN	cDNA FLJ78356, highly similar to Homo sapiens PIMT isozyme I - Homo sapiens
81.44	81.44	50.6	A8K1V1|A8K1V1_HUMAN	cDNA FLJ78366, highly similar to Homo sapiens leucine-rich PPR-motif containing (LRPPRC), mRNA - Homo sapiens	0.9348	0.0283	0.9254	0.0197	0.7424	0
37.75	37.75	45	A8K1Z2|A8K1Z2_HUMAN	cDNA FLJ78475, highly similar to Homo sapiens glycerol-3-phosphate dehydrogenase 2 - Homo sapiens	0.8947	0.0044	0.8902	0.0206	0.7612	0
14.53	14.6	28.3	A8K916|A8K916_HUMAN	cDNA FLJ78481, highly similar to Homo sapiens adaptor-related protein complex 2, beta 1 subunit, mRNA - Homo sapiens	1.0745	0.3355	0.6897	0.0026	0.7314	0.0104
16.59	16.61	23	A8K7R3|A8K7R3_HUMAN	cDNA FLJ78601, highly similar to Homo sapiens glycoprotein (transmembrane) nmb (GPNMB), transcript variant 2, mRNA - Homo sapiens	1.0727	0.0771	0.9822	0.8969	0.8025	0.0467
6.27	6.56	20.9	A8K5F1|A8K5F1_HUMAN	cDNA FLJ78645, highly similar to Homo sapiens DEAH (Asp-Glu-Ala-His) box polypeptide 30 (DHX30), transcript variant 2, mRNA - Homo sapiens	0.9706	0.7818	0.8844	0.2516	0.9414	0.4656
1.72	1.73	9.9	Q8NCK4|Q8NCK4_HUMAN	cDNA FLJ90197 fis, clone MAMMA1001418 - Homo sapiens	1.1021		0.7766		0.8373
19.71	19.78	39.3	Q8NCF7|Q8NCF7_HUMAN	cDNA FLJ90278 fis, clone NT2RP1000325, highly similar to Phosphate carrier protein, mitochondrialprecursor - Homo sapiens	0.9446	0.0486	0.9113	0.0226	0.7833	0
6.28	6.36	30.4	Q8NBT4|Q8NBT4_HUMAN	cDNA FLJ90803 fis, clone Y79AA1000270, highly similar to Vacuolar ATP synthase subunit S1 - Homo sapiens	0.9804	0.9391	0.7548	0.2953	0.7571	0.2446
4	4.02	12.2	Q53HA5|Q53HA5_HUMAN	CDP-diacylglycerol--inositol 3-phosphatidyltransferase isoform 1 variant (Fragment) - Homo sapiens	0.9803		1.2994		1.3839
2.64	2.64	19.4	Q9NV96|CC50A_HUMAN	Cell cycle control protein 50A - Homo sapiens	1.0615	0.7807	0.698	0.1111	0.6201	0.393
3.71	5.71	23	P60953|CDC42_HUMAN	Cell division control protein 42 homolog precursor - Homo sapiens	1.0203	0.8394	1.002	0.9853	1.0062	0.9537
8.34	8.42	33.9	Q08ES8|Q08ES8_HUMAN	Cell growth-inhibiting protein 34 - Homo sapiens	0.8423	0.0136	1.198	0.0087	1.8867	0
15.2	15.22	47.3	Q08ET0|Q08ET0_HUMAN	Cell proliferation-inducing protein 47 - Homo sapiens	0.8399	0.0028	0.8115	0.0049	0.7743	0
1.66	1.72	17.4	O75503|CLN5_HUMAN	Ceroid-lipofuscinosis neuronal protein 5 - Homo sapiens	0.8798		1.1928		1.2206
10.53	10.54	32.7	Q54A51|Q54A51_HUMAN	Cervical EMMPRIN - Homo sapiens	1.39	0.0039	0.9952	0.9533	1.0495	0.5574
4.23	4.28	28	Q5SZY0|Q5SZY0_HUMAN	Chaperonin containing TCP1, subunit 3 - Homo sapiens	0.8637	0.1988	1.0799	0.6296	2.1015	0.0234
1.78	1.87	18.9	Q59ET3|Q59ET3_HUMAN	Chaperonin containing TCP1, subunit 6A isoform a variant (Fragment) - Homo sapiens	1.2511	0.3711	1.5052	0.0369	3.986	0.0612
6.09	6.18	26.3	Q53HU0|Q53HU0_HUMAN	Chaperonin containing TCP1, subunit 8 (Theta) variant (Fragment) - Homo sapiens	1.659	0.0035	2.3045	0.0032	5.7212	0.0001
2.27	2.34	18.3	Q9H444|CHM4B_HUMAN	Charged multivesicular body protein 4b - Homo sapiens
8.13	8.18	32.8	Q9BWS9|CHID1_HUMAN	Chitinase domain-containing protein 1 precursor - Homo sapiens	0.8159	0.0057	0.8315	0.0267	0.741	0.0061
2.88	4.59	17.8	P36222|CH3L1_HUMAN	Chitinase-3-like protein 1 precursor - Homo sapiens	0.6806	0.0914	0.2108	0.0008	0.1937	0.0001
2.71	2.75	16	Q5VX51|Q5VX51_HUMAN	Chitobiase, di-N-acetyl- - Homo sapiens	0.8849	0.1544	1.4643	0.0059	1.1122	0.5132
6.06	6.11	24.4	Q9BT22|ALG1_HUMAN	Chitobiosyldiphosphodolichol beta-mannosyltransferase - Homo sapiens	1.1101	0.507	1.3619	0.0373	1.2405	0.2273
1.44	1.49	12.2	Q96S66|CLCC1_HUMAN	Chloride channel CLIC-like protein 1 precursor - Homo sapiens	1.0052	0.9517	1.0238	0.5462	1.1354	0.3279
7.8	7.94	22.7	P51798|CLCN7_HUMAN	Chloride channel protein 7 - Homo sapiens	1.011	0.8893	1.0668	0.4372	0.877	0.3566
1.58	1.6	7.5	Q9Y6K0|CEPT1_HUMAN	Choline/ethanolaminephosphotransferase 1 - Homo sapiens
1.66	1.68	16.8	Q8N0X4|CLYBL_HUMAN	Citrate lyase subunit beta-like protein, mitochondrial precursor - Homo sapiens	0.8085	0.313	0.8906	0.2336	0.7919	0.1354
28.48	28.49	38.8	O75390|CISY_HUMAN	Citrate synthase, mitochondrial precursor - Homo sapiens	0.827	0	0.8296	0	0.613	0
2.38	2.38	13.7	Q96MX0|CKLF3_HUMAN	CKLF-like MARVEL transmembrane domain-containing protein 3 - Homo sapiens	1.2201		0.7937		1.1918
4.85	4.86	16.9	Q9NX76|CKLF6_HUMAN	CKLF-like MARVEL transmembrane domain-containing protein 6 - Homo sapiens	1.616		1.3536
15.11	15.45	22	Q00610|CLH1_HUMAN	Clathrin heavy chain 1 - Homo sapiens	1.2232	0.027	1.5572	0	2.4473	0
3.21	3.27	17.7	P09496|CLCA_HUMAN	Clathrin light chain A - Homo sapiens	1.0802	0.8482	1.525	0.3012	3.1536	0.0774
9.02	9.02	22.6	O96005|CLPT1_HUMAN	Cleft lip and palate transmembrane protein 1 - Homo sapiens	0.9815	0.6679	0.9395	0.4469	1.0454	0.4648
1.4	1.4	21.8	Q14019|COTL1_HUMAN	Coactosin-like protein - Homo sapiens
2.14	2.25	10.9	P53618|COPB_HUMAN	Coatomer subunit beta - Homo sapiens	1.3946	0.4526	1.9117	0.3895	4.8608	0.0109
8.04	8.08	36	Q96EY8|MMAB_HUMAN	Cob(I)yrinic acid a,c-diamide adenosyltransferase, mitochondrial precursor - Homo sapiens	0.9288	0.6913	0.8949	0.3799	0.6237	0.016
8.05	8.12	50.6	P23528|COF1_HUMAN	Cofilin-1 - Homo sapiens	1.883	0	1.6333	0	2.182	0
2.65	2.68	29.6	Q8NE86|C109A_HUMAN	Coiled-coil domain-containing protein 109A - Homo sapiens	0.8884	0.1492	0.9298	0.2688	0.8039	0.0673
3.33	3.4	19.4	Q96NT0|CC115_HUMAN	Coiled-coil domain-containing protein 115 - Homo sapiens	1.144	0.6158	1.1272		0.9905	0.9876
8.54	8.56	21.1	Q96A33|CCD47_HUMAN	Coiled-coil domain-containing protein 47 precursor - Homo sapiens	0.9285	0.6307	1.2173	0.1915	1.5252	0.0982
6.62	6.65	14.8	Q96ER9|CCD51_HUMAN	Coiled-coil domain-containing protein 51 - Homo sapiens	0.9385	0.5823	0.9174	0.3293	0.6942	0.0007
4.66	4.66	38.7	Q9Y2R0|CCD56_HUMAN	Coiled-coil domain-containing protein 56 - Homo sapiens	0.996	0.9612	1.085	0.0089	0.7141	0.212
2	2.04	9.7	Q4VC31|CCD58_HUMAN	Coiled-coil domain-containing protein 58 - Homo sapiens
1.72	1.73	21.3	Q9GZT6|CC90B_HUMAN	Coiled-coil domain-containing protein 90B, mitochondrial precursor - Homo sapiens	1.1464		0.8583		0.7579
2.2	2.33	20.1	Q567U6|CCD93_HUMAN	Coiled-coil domain-containing protein 93 - Homo sapiens	0.8366	0.4045	0.893	0.5391	1.2194	0.4244
15.9	15.91	59	Q9NX63|CHCH3_HUMAN	Coiled-coil-helix-coiled-coil-helix domain-containing protein 3, mitochondrial precursor - Homo sapiens	0.8396	0.0052	0.8838	0.0235	0.737	0
3.06	3.06	17.1	Q9Y375|CIA30_HUMAN	Complex I intermediate-associated protein 30, mitochondrial precursor - Homo sapiens	1.0102	0.9649	0.8844	0.6982	0.7136	0.4683
2	5.31	25.8	Q9BWC7|Q9BWC7_HUMAN	COMT protein - Homo sapiens	0.7119	0.4746	1.5808	0.6265	1.3305	0.346
3.89	3.92	13.2	O75131|CPNE3_HUMAN	Copine-3 - Homo sapiens	1.693	0.21	1.2367	0.6127	1.5402	0.2445
7.64	7.67	22.2	Q53F08|Q53F08_HUMAN	Coproporphyrinogen oxidase variant (Fragment) - Homo sapiens	0.6923	0.0036	0.3548	0.0183	0.353	0.036
4.2	4.26	18.5	O75367|H2AY_HUMAN	Core histone macro-H2A.1 - Homo sapiens	0.8818	0.3447	0.3808	0.0001	1.0246	0.5742
2.02	2.62	15.8	P31146|COR1A_HUMAN	Coronin-1A - Homo sapiens
6.41	6.46	21.3	A7MAP1|A7MAP1_HUMAN	Coronin-1C_i3 protein - Homo sapiens	1.5183	0.024	1.0182	0.8587	1.2755	0.034
5.68	5.69	26.7	P28845|DHI1_HUMAN	Corticosteroid 11-beta-dehydrogenase isozyme 1 - Homo sapiens	0.925	0.4032	1.2414	0.0183	1.1972	0.1196
5.57	5.59	32.5	Q6FGA0|Q6FGA0_HUMAN	COX7A2L protein - Homo sapiens	0.8952	0.2834	0.794	0.0283	0.8075	0.0333
1.71	1.92	11.3	Q59FD2|Q59FD2_HUMAN	CTAGE family, member 5 isoform 1 variant (Fragment) - Homo sapiens	0.9519	0.6674	1.1936	0.0796	1.2063	0.368
10.53	10.9	39.3	Q6FHS5|Q6FHS5_HUMAN	CTSS protein - Homo sapiens	0.9993	0.9861	1.1518	0.007	0.7432	0
3.7	3.71	22.9	Q9NY25|CLC5A_HUMAN	C-type lectin domain family 5 member A - Homo sapiens	1.793		2.8458		3.2046
3.42	3.44	26.1	Q6IB14|Q6IB14_HUMAN	CYB5 protein - Homo sapiens	0.875	0.6477	1.1731	0.3636	0.8602	0.5267
2.28	2.29	36.7	Q76LA1|Q76LA1_HUMAN	Cystatin B - Homo sapiens	1.0121	0.9348	1.4281	0.493	1.6567	0.0544
23.22	23.28	33.5	P04839|CY24B_HUMAN	Cytochrome b-245 heavy chain - Homo sapiens	1.2952	0	1.0538	0.3132	1.095	0.1386
13.89	13.89	49.7	P13498|CY24A_HUMAN	Cytochrome b-245 light chain - Homo sapiens	1.2309	0.0017	1.0985	0.1876	1.4135	0.0005
2.2	2.6	21.9	O43169|CYB5B_HUMAN	Cytochrome b5 type B precursor - Homo sapiens	1.0477		1.2057		0.9416
15.24	15.24	45	P31930|QCR1_HUMAN	Cytochrome b-c1 complex subunit 1, mitochondrial precursor - Homo sapiens	0.8945	0.0717	0.8084	0.0016	0.667	0
30.19	30.19	62.5	P22695|QCR2_HUMAN	Cytochrome b-c1 complex subunit 2, mitochondrial precursor - Homo sapiens	0.8505	0.0079	0.8555	0.0058	0.8403	0.0042
4.97	5.03	30.8	P07919|QCR6_HUMAN	Cytochrome b-c1 complex subunit 6, mitochondrial precursor - Homo sapiens	1.0238	0.7748	1.0373	0.6273	0.7972	0.0185
4.57	4.58	63.4	O14949|QCR8_HUMAN	Cytochrome b-c1 complex subunit 8 - Homo sapiens	0.9903	0.8988	0.9136	0.2249	0.7406	0.0011
4.09	4.09	41.3	Q9UDW1|QCR9_HUMAN	Cytochrome b-c1 complex subunit 9 - Homo sapiens	0.9839	0.0193	0.9531	0.5774	0.7571	0.0157
9.31	9.38	43.1	P47985|UCRI_HUMAN	Cytochrome b-c1 complex subunit Rieske, mitochondrial precursor - Homo sapiens	1.0205	0.9036	1.0575	0.4955	0.88	0.1301
9.92	10.2	53.3	P99999|CYC_HUMAN	Cytochrome c - Homo sapiens	0.7383	0	0.6775	0	0.302	0
4.82	4.85	20	Q7KZN9|COX15_HUMAN	Cytochrome c oxidase assembly protein COX15 homolog - Homo sapiens	0.9658	0.789	0.9769	0.7511	0.862	0.2228
8.88	8.88	60	P09669|COX6C_HUMAN	Cytochrome c oxidase polypeptide VIc precursor - Homo sapiens	1.0147	0.7244	0.9224	0.1558	0.7868	0.0001
5.69	5.73	23.8	Q4GQP0|Q4GQP0_HUMAN	Cytochrome c oxidase subunit 2 - Homo sapiens	1.1278	0.0318	1.0072	0.8889	0.8893	0.0482
3.88	3.88	63.5	P15954|COX7C_HUMAN	Cytochrome c oxidase subunit 7C, mitochondrial precursor - Homo sapiens	0.9211	0.5084	0.9412	0.6209	0.7447	0.0604
13.24	13.24	54.4	Q6P666|Q6P666_HUMAN	Cytochrome c oxidase subunit IV isoform 1 - Homo sapiens	0.8732	0.0202	0.9596	0.6541	0.8165	0.0379
13.96	14.13	77.3	Q8TB65|Q8TB65_HUMAN	Cytochrome c oxidase subunit Va - Homo sapiens	0.9818	0.8752	0.8784	0.0187	0.6836	0
13.38	13.38	50.4	Q53YB7|Q53YB7_HUMAN	Cytochrome c oxidase subunit Vb - Homo sapiens	0.7076	0.003	0.7869	0.0156	0.7126	0.004
4.18	4.18	34.9	P14854|CX6B1_HUMAN	Cytochrome c oxidase subunit VIb isoform 1 - Homo sapiens	0.9997	0.9949	0.9072	0.0397	0.7735	0.0002
2.19	2.21	42.2	Q496I0|Q496I0_HUMAN	Cytochrome c oxidase subunit VIIa polypeptide 2 - Homo sapiens	1.0953	0.6944	0.9677	0.902	1.1355	0.5413
11.38	11.38	36	P08574|CY1_HUMAN	Cytochrome c1, heme protein, mitochondrial precursor - Homo sapiens	0.9036	0.206	0.8579	0.0721	0.8736	0.2917
29.84	29.93	44.1	Q02318|CP27A_HUMAN	Cytochrome P450 27, mitochondrial precursor - Homo sapiens	0.8661	0.0005	0.6474	0	0.4701	0
8.19	8.22	16.3	Q96SQ9|CP2S1_HUMAN	Cytochrome P450 2S1 - Homo sapiens	0.9381	0.3287	0.9544	0.7479	0.9528	0.615
1.84	1.87	16.3	Q16850|CP51A_HUMAN	Cytochrome P450 51A1 - Homo sapiens	0.8079	0.0255	0.7547	0.0121	0.7351	0.0002
5.43	5.48	19.7	Q5TZW8|Q5TZW8_HUMAN	Cytochrome P450, family 1, subfamily B, polypeptide 1 - Homo sapiens	0.873	0.4155	0.7766	0.0359	0.6313	0.0301
8.27	9.08	17	Q14204|DYHC1_HUMAN	Cytoplasmic dynein 1 heavy chain 1 - Homo sapiens	0.8852	0.1347	1.1288	0.5232	1.5258	0.1687
2	2.01	3.4	Q7Z4X1|Q7Z4X1_HUMAN	Cytoplasmic dynein intermediate chain 2C - Homo sapiens
2.13	2.51	14.3	Q7L576|CYFP1_HUMAN	Cytoplasmic FMR1-interacting protein 1 - Homo sapiens	0.8597	0.1148	1.0539	0.7544	1.385	0.1265
43.29	43.71	51.5	Q07065|CKAP4_HUMAN	Cytoskeleton-associated protein 4 - Homo sapiens	0.9744	0.5284	1.0376	0.4873	1.0404	0.4257
10.46	10.61	23.3	P28838|AMPL_HUMAN	Cytosol aminopeptidase - Homo sapiens	1.0208	0.7761	1.0153	0.8928	1.5336	0.0029
8.39	8.43	22.2	Q02338|BDH_HUMAN	D-beta-hydroxybutyrate dehydrogenase, mitochondrial precursor - Homo sapiens	0.8623	0.1723	0.9409	0.544	0.7316	0.0025
2.55	2.57	17.5	Q59GX6|Q59GX6_HUMAN	DEAD/H (Asp-Glu-Ala-Asp/His) box polypeptide 3 variant (Fragment) - Homo sapiens	0.8369	0.2557	1.457	0.0133	1.9031	0.1132
5.84	6.06	12.9	Q8NF50|DOCK8_HUMAN	Dedicator of cytokinesis protein 8 - Homo sapiens	0.9106	0.3352	0.9706	0.7678	1.2485	0.0066
5.51	5.51	26.5	Q9BTZ2|DHRS4_HUMAN	Dehydrogenase/reductase SDR family member 4 - Homo sapiens	0.9901	0.9574	0.8929	0.3686	0.9541	0.8641
9.1	9.24	26	Q9Y394|DHRS7_HUMAN	Dehydrogenase/reductase SDR family member 7 precursor - Homo sapiens	0.9923	0.942	1.218	0.0148	1.2271	0.0146
1.48	1.5	16.6	Q6IAN0|DRS7B_HUMAN	Dehydrogenase/reductase SDR family member 7B - Homo sapiens
5.97	5.97	20.7	Q9BPW9|DHRS9_HUMAN	Dehydrogenase/reductase SDR family member 9 precursor - Homo sapiens	0.6304	0.0011	0.9041	0.3801	1.0633	0.5373
15.71	15.74	39.6	Q13011|ECH1_HUMAN	Delta(3,5)-Delta(2,4)-dienoyl-CoA isomerase, mitochondrial precursor - Homo sapiens	0.7926	0	0.8369	0.0005	0.6421	0
3.55	3.55	12.8	O00115|DNS2A_HUMAN	Deoxyribonuclease-2-alpha precursor - Homo sapiens	1.0412	0.6071	1.0696	0.3179	0.7074	0.0637
1.53	1.53	13.9	Q9BUN8|DERL1_HUMAN	Derlin-1 - Homo sapiens	1.0422		0.9563		1.0364
2.01	2.06	21.3	Q9NR28|DBLOH_HUMAN	Diablo homolog, mitochondrial precursor - Homo sapiens	0.8801	0.5728	0.7573	0.074	0.5665	0.2944
2.05	2.06	13.1	O75907|DGAT1_HUMAN	Diacylglycerol O-acyltransferase 1 - Homo sapiens
5.45	5.5	21.8	Q5VVL8|Q5VVL8_HUMAN	Dihydrolipoamide branched chain transacylase E2 - Homo sapiens	0.941	0.3755	0.8309	0.12	0.6967	0.0071
21.48	21.52	38.6	Q86YI5|Q86YI5_HUMAN	Dihydrolipoamide S-acetyltransferase - Homo sapiens	0.862	0.0003	0.8534	0.0016	0.7195	0
22.99	23.21	36.1	P09622|DLDH_HUMAN	Dihydrolipoyl dehydrogenase, mitochondrial precursor - Homo sapiens	0.8635	0.0079	0.8572	0.0008	0.7294	0
1.72	1.89	16.2	Q02127|PYRD_HUMAN	Dihydroorotate dehydrogenase, mitochondrial precursor - Homo sapiens	0.7368		0.7651		0.4726
2.22	2.23	19.7	P09417|DHPR_HUMAN	Dihydropteridine reductase - Homo sapiens	0.4938	0.2839	0.3452	0.3789	0.3028	0.2446
6.06	6.06	16.6	Q86U75|Q86U75_HUMAN	Dihydropyrimidinase-like 2 - Homo sapiens	1.0198	0.906	1.4078	0.2991	1.7671	0.3871
5.57	5.64	21.8	P53634|CATC_HUMAN	Dipeptidyl-peptidase 1 precursor - Homo sapiens	1.1635	0.053	1.6814	0.0068	1.0321	0.8123
2.28	2.36	9.9	P98082|DAB2_HUMAN	Disabled homolog 2 - Homo sapiens	0.7831	0.6814	0.4705	0.41	0.5745	0.217
2	2.02	7.9	Q96SL1|DIRC2_HUMAN	Disrupted in renal carcinoma protein 2 - Homo sapiens
6	6.02	12.3	Q96EY1|DNJA3_HUMAN	DnaJ homolog subfamily A member 3, mitochondrial precursor - Homo sapiens	1.0746	0.6073	0.8741	0.6859	0.824	0.4328
15.07	15.09	34.1	Q9UBS4|DJB11_HUMAN	DnaJ homolog subfamily B member 11 precursor - Homo sapiens	1.0118	0.8645	1.1147	0.1031	1.2674	0.0041
2.71	2.71	7.5	Q9NXW2|DJB12_HUMAN	DnaJ homolog subfamily B member 12 - Homo sapiens	0.8291	0.2805	0.9698	0.9111	0.9699	0.8325
1.6	1.66	13.7	Q8IXB1|DJC10_HUMAN	DnaJ homolog subfamily C member 10 precursor - Homo sapiens	0.868	0.2688	0.8815	0.3509	1.0054	0.9563
7.57	7.6	31.3	Q9NVH1|DJC11_HUMAN	DnaJ homolog subfamily C member 11 - Homo sapiens	1.0306	0.5608	0.9873	0.8805	0.8971	0.4163
3.48	3.77	11.9	O75165|DNJCD_HUMAN	DnaJ homolog subfamily C member 13 - Homo sapiens	0.9592	0.8968	0.9925	0.9795	1.1811	0.7056
18.04	18.56	33.7	Q13217|DNJC3_HUMAN	DnaJ homolog subfamily C member 3 precursor - Homo sapiens	0.9136	0.0359	1.0084	0.8406	0.9995	0.9918
4.99	5.03	23.2	Q9H3Z4|DNJC5_HUMAN	DnaJ homolog subfamily C member 5 - Homo sapiens	1.0976	0.3546	0.9997	0.9974	1.1875	0.3096
2.03	2.28	30.3	Q6FGH9|Q6FGH9_HUMAN	DNCL1 protein - Homo sapiens	0.8477	0.1397	1.4734	0.0352	2.5623	0.0602
1.53	1.53	6	Q7L591|DOK3_HUMAN	Docking protein 3 - Homo sapiens	0.907	0.8413	0.975	0.8237	1.1872	0.5991
10.71	10.8	23	Q5VWA5|Q5VWA5_HUMAN	Dolichyl-diphosphooligosaccharide-protein glycosyltransferase - Homo sapiens	1.0399	0.4923	1.0347	0.6121	0.9345	0.2322
16.44	16.44	26.1	P04844|RPN2_HUMAN	Dolichyl-diphosphooligosaccharide--protein glycosyltransferase subunit 2 precursor - Homo sapiens	1.0224	0.73	1.032	0.6828	0.9414	0.4508
4	4.01	21.2	P61803|DAD1_HUMAN	Dolichyl-diphosphooligosaccharide--protein glycosyltransferase subunit DAD1 - Homo sapiens	1.0534	0.7588	0.9231	0.6787	0.9042	0.6325
13.89	13.89	24.4	P46977|STT3A_HUMAN	Dolichyl-diphosphooligosaccharide--protein glycosyltransferase subunit STT3A - Homo sapiens	0.9681	0.5139	1.0361	0.4823	0.9481	0.2312
9.79	11.67	20.5	Q8TCJ2|STT3B_HUMAN	Dolichyl-diphosphooligosaccharide--protein glycosyltransferase subunit STT3B - Homo sapiens	0.9896	0.9025	1.0535	0.523	1.028	0.7685
3.93	3.98	33.5	Q96HK0|Q96HK0_HUMAN	Dolichyl-phosphate mannosyltransferase polypeptide 1, catalytic subunit - Homo sapiens	0.9478	0.6043	1.0061	0.9617	0.8911	0.4137
4	4.03	35.2	Q5SR62|Q5SR62_HUMAN	Dolichyl-phosphate mannosyltransferase polypeptide 3 - Homo sapiens	1.1191	0.4784	1.1097	0.0781	1.2606	0.0831
5.25	5.27	25.5	Q6FGU2|Q6FGU2_HUMAN	DTYMK protein (Fragment) - Homo sapiens	0.8695	0.1621	0.9717	0.8018	1.2375	0.035
29.24	29.42	32.8	O60313|OPA1_HUMAN	Dynamin-like 120 kDa protein, mitochondrial precursor - Homo sapiens	0.8929	0.0752	0.7602	0	0.619	0
3.22	3.68	50	Q96A26|E2IG5_HUMAN	E2-induced gene 5 protein - Homo sapiens	0.7943	0.4689	0.8725	0.4852	0.9769	0.895
2.14	2.22	7.8	Q86TM6|SYVN1_HUMAN	E3 ubiquitin-protein ligase synoviolin precursor - Homo sapiens	0.8947	0.248	1.2258	0.2361	1.3649	0.2248
4.12	4.31	19.3	Q86YH3|Q86YH3_HUMAN	EARS2 protein - Homo sapiens	1.0786	0.5546	0.8491	0.4722	0.6657	0.2176
1.52	1.54	9.1	Q6FGL3|Q6FGL3_HUMAN	EBP protein (Fragment) - Homo sapiens	0.9385		0.9912		0.9181
1.38	1.41	16.7	P49961|ENTP1_HUMAN	Ectonucleoside triphosphate diphosphohydrolase 1 - Homo sapiens	1.1587	0.2464	1.0556	0.599	1.2932	0.0411
4.17	5.19	30.8	Q96C19|EFHD2_HUMAN	EF-hand domain-containing protein D2 - Homo sapiens	1.6792	0.3411	2.0045	0.0864	2.305	0.2885
3.09	3.23	13	Q4LE58|Q4LE58_HUMAN	EIF4G1 variant protein (Fragment) - Homo sapiens	0.8318	0.3436	0.9242	0.7708	0.6534	0.5568
21.19	21.22	49.4	P38117|ETFB_HUMAN	Electron transfer flavoprotein subunit beta - Homo sapiens	0.8582	0.0277	0.9914	0.8573	0.7371	0
6.35	6.37	20.7	Q547S8|Q547S8_HUMAN	Electron transfer flavoprotein ubiquinone oxidoreductase - Homo sapiens	1.0531	0.535	0.8638	0.2428	0.814	0.1131
17.14	17.16	58	Q53XN3|Q53XN3_HUMAN	Electron-transfer-flavoprotein, alpha polypeptide - Homo sapiens	0.8726	0.0188	0.9348	0.2437	0.8684	0.0765
2.01	2.07	22.9	Q8IZ81|ELMD2_HUMAN	ELMO domain-containing protein 2 - Homo sapiens
25.61	25.68	40	Q53HQ7|Q53HQ7_HUMAN	Elongation factor 1-alpha (Fragment) - Homo sapiens	1.3701	0.0001	3.7626	0	10.0381	0
8.21	8.25	19.7	P13639|EF2_HUMAN	Elongation factor 2 - Homo sapiens	1.3513	0.0698	1.8847	0.0031	4.8254	0.0001
16.63	16.67	27.3	Q96RP9|EFG1_HUMAN	Elongation factor G 1, mitochondrial precursor - Homo sapiens	0.9358	0.112	0.902	0.0188	0.7359	0.0002
9.05	9.06	27.1	P43897|EFTS_HUMAN	Elongation factor Ts, mitochondrial precursor - Homo sapiens	0.7866	0.0511	0.8053	0.0276	0.7344	0.0076
48.5	48.51	66.4	P49411|EFTU_HUMAN	Elongation factor Tu, mitochondrial precursor - Homo sapiens	0.9785	0.6642	0.9558	0.1728	0.8352	0.0011
4.09	4.09	13.8	Q6FI02|Q6FI02_HUMAN	EMD protein - Homo sapiens	0.8172	0.3064	1.0483	0.8614	1.1631	0.713
6.17	6.17	20.7	Q9UI08|EVL_HUMAN	Ena/VASP-like protein - Homo sapiens	1.8123	0.0917	2.5358	0.0106	9.308	0.031
3.48	3.59	10.8	Q5T9C0|Q5T9C0_HUMAN	Endoglin - Homo sapiens
17.83	18.02	23.5	Q9NZ08|ERAP1_HUMAN	Endoplasmic reticulum aminopeptidase 1 - Homo sapiens	0.8732	0.1216	0.9982	0.9788	0.8717	0.0453
2.61	2.78	14.5	Q6P179|ERAP2_HUMAN	Endoplasmic reticulum aminopeptidase 2 - Homo sapiens	1.0701	0.5443	1.1427	0.5698	0.832	0.2449
8.22	8.31	10.6	Q7Z2K6|ERMP1_HUMAN	Endoplasmic reticulum metallopeptidase 1 - Homo sapiens	0.7761	0.0236	1.0383	0.8642	0.9888	0.9731
15.12	15.17	53.6	P30040|ERP29_HUMAN	Endoplasmic reticulum protein ERp29 precursor - Homo sapiens	0.873	0.1343	0.9706	0.5783	0.8019	0.0004
10.65	10.75	25.3	Q9Y282|ERGI3_HUMAN	Endoplasmic reticulum-Golgi intermediate compartment protein 3 - Homo sapiens	1.4115	0.0002	0.8405	0.0155	0.959	0.6755
5.48	5.55	27.4	Q53FT9|Q53FT9_HUMAN	Enolase (Fragment) - Homo sapiens	1.4754	0.0046	2.0087	0.0001	2.0067	0.0006
19.6	19.62	43.8	P30084|ECHM_HUMAN	Enoyl-CoA hydratase, mitochondrial precursor - Homo sapiens	0.8455	0.0254	0.8753	0.0251	0.6787	0
6.87	6.87	25.8	P61916|NPC2_HUMAN	Epididymal secretory protein E1 precursor - Homo sapiens	1.0825	0.3479	1.4065	0.0061	1.1026	0.3035
12.78	12.91	31.6	P07099|HYEP_HUMAN	Epoxide hydrolase 1 - Homo sapiens	0.9972	0.975	1.1594	0.2203	1.1063	0.3985
3.72	3.72	11.6	Q9BZD2|S29A3_HUMAN	Equilibrative nucleoside transporter 3 - Homo sapiens	0.6456		0.8142		0.5452
2.33	2.4	23.1	P33947|ERD22_HUMAN	ER lumen protein retaining receptor 2 - Homo sapiens	0.8895	0.3636	0.8023	0.0592	0.7809	0.0454
4.66	7.04	29.2	O75477|ERLN1_HUMAN	Erlin-1 - Homo sapiens	1.8452	0.0698	2.5055	0.0147	2.3239	0.0512
7.71	7.74	23.9	O94905|ERLN2_HUMAN	Erlin-2 - Homo sapiens	0.9098	0.1221	1.2218	0.0137	1.114	0.0433
14.34	14.34	37.4	Q96HE7|ERO1A_HUMAN	ERO1-like protein alpha precursor - Homo sapiens	0.9157	0.1841	1.0275	0.6641	0.9598	0.4608
11.18	11.2	52.1	P27105|STOM_HUMAN	Erythrocyte band 7 integral membrane protein - Homo sapiens	0.9689	0.7026	1.1836	0.0536	1.223	0.0431
3.22	3.31	20.4	Q5T4F0|Q5T4F0_HUMAN	Erythrocyte membrane protein band 4.1-like 2 - Homo sapiens	0.9793	0.7767	0.9078	0.4304	1.0345	0.8494
9.12	9.12	20.9	P30042|ES1_HUMAN	ES1 protein homolog, mitochondrial precursor - Homo sapiens	0.942	0.4176	0.8011	0.0716	0.6242	0.0009
5.14	5.32	15.7	Q8NBQ5|DHB11_HUMAN	Estradiol 17-beta-dehydrogenase 11 precursor - Homo sapiens	1.1092	0.6369	1.1167	0.1776	1.2642	0.1156
10.69	10.72	36.2	Q53GQ0|DHB12_HUMAN	Estradiol 17-beta-dehydrogenase 12 - Homo sapiens	0.8758	0.0286	0.9957	0.9582	1.0018	0.9907
10.37	10.38	46.5	O95571|ETHE1_HUMAN	ETHE1 protein, mitochondrial precursor - Homo sapiens	1.0293	0.8427	1.0552	0.8559	0.6791	0.3728
10.77	10.79	26.6	P60842|IF4A1_HUMAN	Eukaryotic initiation factor 4A-I - Homo sapiens	1.6424	0.1841	6.4196	0.0041	14.8329	0
2.59	2.59	17.5	P63241|IF5A1_HUMAN	Eukaryotic translation initiation factor 5A-1 - Homo sapiens	0.9374	0.6922	2.7578	0.0108	7.1945	0.0033
5	5	16	Q9BQ95|ECSIT_HUMAN	Evolutionarily conserved signaling intermediate in Toll pathway, mitochondrial precursor - Homo sapiens
27.35	27.36	30	Q9BSJ8|ESYT1_HUMAN	Extended-synaptotagmin-1 - Homo sapiens	0.9983	0.9752	0.979	0.7423	1.0251	0.6222
1.45	1.81	11.3	Q4LE83|Q4LE83_HUMAN	FASN variant protein (Fragment) - Homo sapiens	0.8196	0.1921	0.6976	0.0021	0.7357	0.6061
3.22	3.31	22.2	Q01469|FABP5_HUMAN	Fatty acid-binding protein, epidermal - Homo sapiens	1.5839	0.0143	1.4691	0.0848	1.9023	0.0283
4.71	4.71	15.3	Q8WVX9|FACR1_HUMAN	Fatty acyl-CoA reductase 1 - Homo sapiens	0.9034	0.075	0.8487	0.0939	0.7419	0.0368
2.83	2.96	13.2	Q92637|Q92637_HUMAN	Fc gamma receptor I - Homo sapiens
2.39	2.63	15.6	Q6IAX1|Q6IAX1_HUMAN	FDFT1 protein - Homo sapiens	0.9795	0.8178	1.0282	0.7939	1.0475	0.7431
15	15.01	27.9	Q86UX7|URP2_HUMAN	Fermitin family homolog 3 - Homo sapiens	1.3776	0.0041	2.0757	0.0095	4.8787	0.0002
8.24	8.24	22.8	Q6GSK2|Q6GSK2_HUMAN	Ferredoxin reductase - Homo sapiens	0.8923	0.33	0.7994	0.2164	0.603	0.0538
5.28	5.29	40.5	Q6NS36|Q6NS36_HUMAN	Ferritin (Fragment) - Homo sapiens	1.1138	0.6082	1.4102	0.1196	0.6208	0.0674
4	4.15	29.8	Q6S4P3|Q6S4P3_HUMAN	Ferritin light polypeptide variant - Homo sapiens	0.9404	0.2577	1.0114	0.8188	0.8314	0.128
3.74	3.79	22.4	Q53FU1|Q53FU1_HUMAN	Ferrochelatase (Fragment) - Homo sapiens	0.9618	0.6407	0.9018	0.1207	0.7971	0.0714
2.25	2.26	14.1	Q53GD2|Q53GD2_HUMAN	Fibrinogen-like 2 variant (Fragment) - Homo sapiens	0.9393	0.8016	0.9136	0.686	1.2039	0.5369
85.95	85.95	33.2	Q5HY55|Q5HY55_HUMAN	Filamin A, alpha - Homo sapiens	1.4935	0	1.8706	0	4.6238	0
2	2	20.4	P30043|BLVRB_HUMAN	Flavin reductase - Homo sapiens			2.8179		6.5191
14.45	14.49	39.6	Q6FG43|Q6FG43_HUMAN	FLOT2 protein - Homo sapiens	1.1706	0.0216	1.2607	0.0005	1.2919	0.0002
5.6	5.66	29	Q5ST80|Q5ST80_HUMAN	Flotillin 1 - Homo sapiens	0.9896	0.8959	1.2836	0.0045	1.0627	0.6111
2.33	2.49	15.1	O95466|FMNL_HUMAN	Formin-like protein 1 - Homo sapiens	1.1401	0.5941	2.1362	0.1352	2.9393	0.1886
12.49	12.49	39	Q6FI10|Q6FI10_HUMAN	Fructose-bisphosphate aldolase - Homo sapiens	1.3687	0.0492	2.0274	0	3.6478	0
8.07	8.12	33.8	Q53GF9|Q53GF9_HUMAN	Full-length cDNA 5-PRIME end of clone CS0DF013YM24 of Fetal brain of Homo sapiens (Human) variant (Fragment) - Homo sapiens	1.201	0.0849	1.0143	0.925	1.081	0.5104
2.08	2.15	19.4	Q53XC0|Q53XC0_HUMAN	Full-length cDNA clone CS0DL010YH08 of B cells (Ramos cell line) of Homo sapiens - Homo sapiens	0.791		0.5326		0.8527
27.45	27.46	49.8	P07954|FUMH_HUMAN	Fumarate hydratase, mitochondrial precursor - Homo sapiens	1.0113	0.7331	0.9163	0.044	0.7673	0
6.09	6.09	37.1	Q6P587|FAHD1_HUMAN	Fumarylacetoacetate hydrolase domain-containing protein 1 - Homo sapiens	0.7905	0.0201	0.8569	0.1844	0.497	0.0012
6.45	6.46	32.1	Q5HYP8|Q5HYP8_HUMAN	FUN14 domain containing 2 (Fragment) - Homo sapiens	1.0211	0.7802	1.0404	0.761	0.8498	0.1769
1.44	1.44	14	Q13344|Q13344_HUMAN	Fus-like protein (Fragment) - Homo sapiens	1.1828	0.5609	1.4958	0.1314	2.3045	0.1724
13.29	13.31	62.2	P09382|LEG1_HUMAN	Galectin-1 - Homo sapiens	2.7346	0	5.8213	0	3.9683	0
10.97	10.97	37.9	Q8WYQ7|Q8WYQ7_HUMAN	Galectin-9 - Homo sapiens	1.5909	0	1.2873	0.0004	1.1233	0.0387
2.22	2.23	15.4	Q92820|GGH_HUMAN	Gamma-glutamyl hydrolase precursor - Homo sapiens	0.6761		1.3203		0.9919
2.07	2.17	13.8	Q99747|SNAG_HUMAN	Gamma-soluble NSF attachment protein - Homo sapiens
7.55	7.56	22	Q53X96|Q53X96_HUMAN	GBAS protein (Fragment) - Homo sapiens	0.86	0.0918	0.8062	0.0223	0.7219	0.0004
2.09	3.46	11.6	Q92616|GCN1L_HUMAN	GCN1-like protein 1 - Homo sapiens	0.8523	0.4678	0.8328	0.3477	0.9324	0.7363
1.52	1.55	16.8	O95479|G6PE_HUMAN	GDH/6PGL endoplasmic bifunctional protein precursor - Homo sapiens	0.795	0.0854	0.9713	0.7755	0.8853	0.4043
1.72	2.09	10.3	Q9H488|OFUT1_HUMAN	GDP-fucose protein O-fucosyltransferase 1 precursor - Homo sapiens	1.0582	0.2119	1.1104	0.343	1.0616	0.8674
28.9	28.98	35.4	Q5T0I2|Q5T0I2_HUMAN	Gelsolin - Homo sapiens	1.7815	0	3.4276	0	7.2306	0
4.33	4.36	11.1	Q8N2G8|GHDC_HUMAN	GH3 domain-containing protein precursor - Homo sapiens	1.4226	0.0027	1.3292	0.2695	1.3883	0.11
9.24	9.25	19.2	A8K8D9|A8K8D9_HUMAN	Glucose-6-phosphate 1-dehydrogenase - Homo sapiens	1.201	0.0749	2.235	0.0002	5.2091	0
20.5	20.51	36.9	P14314|GLU2B_HUMAN	Glucosidase 2 subunit beta precursor - Homo sapiens	1.0127	0.8072	1.1238	0.0336	1.0774	0.2207
14.86	14.87	29.9	Q58F09|Q58F09_HUMAN	Glucosidase I - Homo sapiens	0.9369	0.459	1.0501	0.3092	0.9033	0.214
13.57	13.59	23.1	P04062|GLCM_HUMAN	Glucosylceramidase precursor - Homo sapiens	0.9981	0.9578	1.0605	0.264	0.8035	0.007
43.92	43.93	58.2	Q53GW3|Q53GW3_HUMAN	Glutamate dehydrogenase 1 variant (Fragment) - Homo sapiens	0.9023	0.0077	0.872	0.0005	0.7709	0
16.44	16.45	32.1	O94925|GLSK_HUMAN	Glutaminase kidney isoform, mitochondrial precursor - Homo sapiens	0.8065	0.0035	0.8258	0.0237	0.6791	0
4.34	4.37	13.7	Q53HS0|Q53HS0_HUMAN	Glutaminyl-tRNA synthetase variant (Fragment) - Homo sapiens	1.0814	0.5874	1.3602	0.1846	1.5645	0.2552
2.61	2.69	28	Q86SX6|GLRX5_HUMAN	Glutaredoxin-related protein 5 - Homo sapiens	0.8783	0.2381	0.8319	0.0778	0.6098	0.0743
7.66	7.83	30.8	Q92947|GCDH_HUMAN	Glutaryl-CoA dehydrogenase, mitochondrial precursor - Homo sapiens	0.9169	0.2958	0.9707	0.7723	0.8747	0.193
12.06	12.06	45.3	P07203|GPX1_HUMAN	Glutathione peroxidase 1 - Homo sapiens	1.053	0.6853	1.2637	0.0557	1.4532	0.0216
5.15	5.21	21.5	P00390|GSHR_HUMAN	Glutathione reductase, mitochondrial precursor - Homo sapiens	0.9175	0.3723	1.2026	0.4305	1.2354	0.2727
2.89	2.89	18.7	P78417|GSTO1_HUMAN	Glutathione transferase omega-1 - Homo sapiens
19.25	19.25	49.3	Q53X65|Q53X65_HUMAN	Glyceraldehyde 3-phosphate dehydrogenase (Fragment) - Homo sapiens	1.0968	0.2706	2.0746	0	5.2978	0
6.65	6.7	20.2	Q6IQ27|Q6IQ27_HUMAN	Glycerol kinase - Homo sapiens	0.9679	0.7034	1.139	0.142	1.1316	0.2391
2.15	2.15	7.6	Q9NZC3|GDE1_HUMAN	Glycerophosphodiester phosphodiesterase 1 - Homo sapiens	1.0698	0.7778	1.0803	0.6159	1.2321	0.4215
28.47	28.49	30.5	Q8NBJ5|GT251_HUMAN	Glycosyltransferase 25 family member 1 precursor - Homo sapiens	1.0437	0.3029	1.0827	0.1359	1.0019	0.971
4.73	5.01	24.6	P41250|SYG_HUMAN	Glycyl-tRNA synthetase - Homo sapiens	1.0294	0.867	1.0607	0.4424	1.1573	0.4156
6.98	6.99	26.5	Q6LBL5|Q6LBL5_HUMAN	GM2 activator protein - Homo sapiens	0.8463	0.0082	0.6435	0	0.5613	0
1.93	6.67	32.9	Q6FHM2|Q6FHM2_HUMAN	GNB2 protein - Homo sapiens	1.5297	0.2185	1.1076	0.6535	1.0905	0.6664
35.3	35.52	32.5	Q92896|GSLG1_HUMAN	Golgi apparatus protein 1 precursor - Homo sapiens	1.0831	0.035	0.6378	0	0.6956	0
4.85	5.04	17.8	Q5SYX5|Q5SYX5_HUMAN	Golgi autoantigen, golgin subfamily a, 2 (Fragment) - Homo sapiens	1.2868	0.126	0.9743	0.8635	1.2853	0.0043
3.54	3.59	13.9	O00461|GOLI4_HUMAN	Golgi integral membrane protein 4 - Homo sapiens	0.8312	0.4442	0.9509		0.9329
2.05	2.1	16.1	Q9H3P7|GCP60_HUMAN	Golgi resident protein GCP60 - Homo sapiens	0.3335		0.8694		1.544
5.49	5.51	32.5	Q9H4G4|GAPR1_HUMAN	Golgi-associated plant pathogenesis-related protein 1 - Homo sapiens	1.1488	0.2628	0.8215	0.0221	0.8231	0.1497
2.04	2.22	12.7	Q8TBA6|GOGA5_HUMAN	Golgin subfamily A member 5 - Homo sapiens	1.077				1.0427
4.71	6.2	18.3	Q14789|GOGB1_HUMAN	Golgin subfamily B member 1 - Homo sapiens	0.9619	0.7112	0.7894	0.2759	0.9551	0.8309
2.23	2.81	8.2	Q92538|GBF1_HUMAN	Golgi-specific brefeldin A-resistance guanine nucleotide exchange factor 1 - Homo sapiens	1.3894	0.1819	0.723	0.5125	1.1361	0.4572
6.38	6.43	17.5	Q96S52|PIGS_HUMAN	GPI transamidase component PIG-S - Homo sapiens	0.9521	0.1537	1.1337	0.0774	1.0193	0.7515
2.31	2.66	5.3	Q8WXG9|GPR98_HUMAN	G-protein coupled receptor 98 precursor - Homo sapiens	1.0342		0.8848		1.1535
1.31	1.32	14.2	P16260|GDC_HUMAN	Graves disease carrier protein - Homo sapiens
2.78	2.8	19.2	Q12849|GRSF1_HUMAN	G-rich sequence factor 1 - Homo sapiens	1.0104	0.9034	0.6829	0.0217	0.5548	0.0329
2.3	2.31	12.9	Q5VT94|Q5VT94_HUMAN	Growth hormone inducible transmembrane protein - Homo sapiens	1.0822	0.5448	1.0097	0.971	0.8211	0.6905
10.99	11.03	33.1	Q2TU34|Q2TU34_HUMAN	Growth-inhibiting protein 17 - Homo sapiens	1.211	0.2195	1.676	0.0066	1.6918	0.0056
14.08	14.21	64.1	Q9HAV7|GRPE1_HUMAN	GrpE protein homolog 1, mitochondrial precursor - Homo sapiens	0.8092	0.0291	0.8369	0.0055	0.5955	0
13.02	13.09	48.6	Q6P4H0|Q6P4H0_HUMAN	GSTK1 protein - Homo sapiens	0.9306	0.2304	0.9365	0.264	0.6809	0
4.78	4.83	19.9	Q6IB17|Q6IB17_HUMAN	GSTZ1 protein - Homo sapiens	0.8401	0.061	0.8995	0.1501	0.8881	0.5272
11.15	11.15	53.7	Q9UIJ7|KAD3_HUMAN	GTP:AMP phosphotransferase mitochondrial - Homo sapiens	0.8377	0.0042	0.747	0.0005	0.5236	0
7.16	7.28	26.1	Q8WWP7|GIMA1_HUMAN	GTPase IMAP family member 1 - Homo sapiens	0.9292	0.5268	1.0259	0.8555	0.9062	0.2065
2.79	3.34	11.7	O75616|ERAL_HUMAN	GTP-binding protein era homolog - Homo sapiens	1.0306		0.6342		0.6893
1.78	5.17	32.3	Q9NR31|SAR1A_HUMAN	GTP-binding protein SAR1a - Homo sapiens	0.605	0.1143	1.6166	0.0922	3.5087	0.0152
5.21	5.25	28.3	Q9Y6B6|SAR1B_HUMAN	GTP-binding protein SAR1b - Homo sapiens	1.2236	0.3836	1.2658	0.0077	1.7621	0.0994
3.75	9.69	26	Q5TZX1|Q5TZX1_HUMAN	Guanine nucleotide binding protein (G protein), alpha inhibiting activity polypeptide 3 - Homo sapiens	1.0389	0.7098	1.0439	0.4015	1.0155	0.8901
14.81	14.82	35	Q14344|GNA13_HUMAN	Guanine nucleotide-binding protein alpha-13 subunit - Homo sapiens	1.2525	0.0165	0.8607	0.0494	1.0942	0.195
7.97	11.8	37.5	P04899|GNAI2_HUMAN	Guanine nucleotide-binding protein G(i), alpha-2 subunit - Homo sapiens	1.6221	0.186	1.3267	0.2497	1.599	0.065
5.77	5.78	47.1	P63218|GBG5_HUMAN	Guanine nucleotide-binding protein G(I)/G(S)/G(O) subunit gamma-5 precursor - Homo sapiens	1.3038	0.0499	1.2331	0.1532	1.1294	0.3001
7.87	7.96	30	P62873|GBB1_HUMAN	Guanine nucleotide-binding protein G(I)/G(S)/G(T) subunit beta-1 - Homo sapiens	1.3294	0.1446	1.0772	0.66	1.0997	0.0127
3.4	3.41	13.6	Q6IBK9|Q6IBK9_HUMAN	HCLS1 protein - Homo sapiens	1.0997		1.0269		1.6084
2	2.01	15.2	Q96BR5|CA163_HUMAN	Hcp beta-lactamase-like protein C1orf163 - Homo sapiens	0.6912	0.0579	0.4434	0.0667	0.3801	0.0084
4.2	16.9	29.8	P08107|HSP71_HUMAN	Heat shock 70 kDa protein 1 - Homo sapiens	1.0094	0.9634	1.1399	0.6243	2.4095	0.0482
65.28	65.37	62.4	Q1HB43|Q1HB43_HUMAN	Heat shock 70kDa protein 9B - Homo sapiens	0.9011	0	0.8111	0	0.6906	0
37.12	45.15	51.7	P11142|HSP7C_HUMAN	Heat shock cognate 71 kDa protein - Homo sapiens	0.8927	0.0549	0.9828	0.797	1.624	0
12.6	12.6	55.6	P04792|HSPB1_HUMAN	Heat shock protein beta-1 - Homo sapiens	1.8651	0.0666	5.1617	0.0001	13.9076	0
3.48	19.01	29.4	P07900|HS90A_HUMAN	Heat shock protein HSP 90-alpha - Homo sapiens	1.1239	0.2695	1.4523	0	1.848	0.0354
25.5	28.94	34.5	P08238|HS90B_HUMAN	Heat shock protein HSP 90-beta - Homo sapiens	1.3322	0.0002	2.3493	0.0006	5.6447	0
31.64	31.99	41.7	P19106|HEMA_I72A2	Hemagglutinin precursor - Influenza A virus (strain A/Udorn/307/1972 H3N2)	3.0047	0	7.2938	0	7.1765	0
3.58	4.33	11.9	P02790|HEMO_HUMAN	Hemopexin precursor - Homo sapiens	1.7855	0.1131	1.7884	0.129	3.8462	0.0044
2.84	2.93	17.7	Q7LGA3|HS2ST_HUMAN	Heparan sulfate 2-O-sulfotransferase 1 - Homo sapiens	1.0987	0.6274	0.5525	0.0424	0.5344	0.0705
3.48	3.48	46.1	Q7Z4W8|Q7Z4W8_HUMAN	Heparin-binding protein HBp15 - Homo sapiens	0.9223	0.6564	1.1569	0.5752	1.369	0.2816
4.38	9.03	28.5	P09651|ROA1_HUMAN	Heterogeneous nuclear ribonucleoprotein A1 - Homo sapiens	0.5704	0.1063	1.2318	0.0329	2.0152	0.0407
2.05	7.1	23.3	P51991|ROA3_HUMAN	Heterogeneous nuclear ribonucleoprotein A3 - Homo sapiens	0.7962	0.0159	1.5761	0.0001	2.3277	0
5.62	5.74	28.3	O60506|HNRPQ_HUMAN	Heterogeneous nuclear ribonucleoprotein Q - Homo sapiens	0.7627	0.2525	0.8571	0.8317	1.4854	0.6669
5.97	6.01	13.1	Q00839|HNRPU_HUMAN	Heterogeneous nuclear ribonucleoprotein U - Homo sapiens	0.9002	0.4792	1.405	0.0566	2.5668	0.0024
12.15	12.2	32	P22626|ROA2_HUMAN	Heterogeneous nuclear ribonucleoproteins A2/B1 - Homo sapiens	0.7897	0.0113	1.6717	0.1709	3.4091	0.0267
6.17	6.24	38.9	P07910|HNRPC_HUMAN	Heterogeneous nuclear ribonucleoproteins C1/C2 - Homo sapiens	0.8668	0.4422	1.4044	0.1299	2.0806	0.0041
8.29	9.99	23.2	Q9BVJ8|Q9BVJ8_HUMAN	HEXA protein (Fragment) - Homo sapiens	0.8776	0.1249	1.288	0.001	0.9702	0.6322
31.66	31.81	38.9	Q59FD4|Q59FD4_HUMAN	Hexokinase 1 isoform HKI variant (Fragment) - Homo sapiens	1.3819	0	1.9641	0	2.6874	0
4.04	4.53	15	Q59H08|Q59H08_HUMAN	Hexokinase 3 variant (Fragment) - Homo sapiens	0.9531	0.9594	0.8804	0.366	1.0538	0.9664
6.32	6.32	32.6	P30273|FCERG_HUMAN	High affinity immunoglobulin epsilon receptor subunit gamma precursor - Homo sapiens	1.0495	0.7404	0.8331	0.2934	1.2764	0.349
6.47	6.48	49.7	Q9BX68|HINT2_HUMAN	Histidine triad nucleotide-binding protein 2 - Homo sapiens	0.9725	0.8239	0.8398	0.2936	0.8048	0.2136
17.72	17.72	46.6	Q4VB24|Q4VB24_HUMAN	Histone cluster 1, H1e - Homo sapiens	0.8584	0.2999	1.0984	0.6521	2.9779	0.0017
2.04	15.99	50.2	P16403|H12_HUMAN	Histone H1.2 - Homo sapiens	0.467	0.1489	1.0633	0.4792	3.6357	0.0062
9.11	16.76	46.9	P16401|H15_HUMAN	Histone H1.5 - Homo sapiens	0.7331	0.0153	1.0528	0.557	2.8649	0
6.72	6.74	50.3	P16104|H2AX_HUMAN	Histone H2A.x - Homo sapiens	1.2853	0.0047	0.4097	0	1.2711	0.0186
4.05	6.52	49.2	Q71UI9|H2AV_HUMAN	Histone H2AV - Homo sapiens	1.1113		0.6495		1.1485
6.73	6.74	62.7	Q99879|H2B1M_HUMAN	Histone H2B type 1-M - Homo sapiens	1.0512	0.6187	0.3286	0	1.2644	0.0323
8.34	8.34	33.1	Q71DI3|H32_HUMAN	Histone H3.2 - Homo sapiens	1.038	0.5922	0.4072	0	1.1947	0.0097
14.86	14.86	73.8	Q0VAS5|Q0VAS5_HUMAN	Histone H4 - Homo sapiens	1.1511	0.0318	0.383	0	1.2131	0.0062
7.78	7.78	27	P04233|HG2A_HUMAN	HLA class II histocompatibility antigen gamma chain - Homo sapiens	0.8601	0.005	0.3828	0	0.3965	0
12.16	12.16	37.2	Q9TQE0|2B19_HUMAN	HLA class II histocompatibility antigen, DRB1-9 beta chain precursor - Homo sapiens	1.0434	0.6972	0.8019	0.2405	0.8117	0.1404
6.28	6.32	19.1	B0UXB6|B0UXB6_HUMAN	HLA-B associated transcript 5 - Homo sapiens	0.8627	0.283	1.0449	0.4766	1.2821	0.2172
2.32	2.33	10.6	Q6LEU6|Q6LEU6_HUMAN	HLA-DMB protein (Fragment) - Homo sapiens	1.1746	0.1129	1.0522	0.5761	0.9548	0.706
1.47	1.63	15.9	Q8WM95|Q8WM95_HUMAN	HLA-DPB2 protein - Homo sapiens					2.9315
2.59	5.35	53.9	Q53IG1|Q53IG1_HUMAN	HLA-DRB1*13 variant (Fragment) - Homo sapiens	1.083	0.4336	0.817	0.4139	0.9801	0.9006
8.42	8.42	30.2	Q6IBC0|Q6IBC0_HUMAN	HMGCL protein - Homo sapiens	0.9007	0.1596	0.8637	0.0148	0.6397	0.0001
10.83	10.86	30.4	Q6IBP2|Q6IBP2_HUMAN	HMOX2 protein - Homo sapiens	0.861	0.2435	1.0269	0.7478	0.9597	0.7768
5.86	5.92	19.8	Q6IBM4|Q6IBM4_HUMAN	HNRPH1 protein - Homo sapiens	1.1976	0.0669	3.4542	0.0049	5.8481	0.0004
7.85	8.09	27.2	Q6IBN1|Q6IBN1_HUMAN	HNRPK protein - Homo sapiens	1.3844	0.1028	3.2383	0.014	5.2921	0.0199
8.76	8.76	38	Q0VAC5|Q0VAC5_HUMAN	HP protein - Homo sapiens	1.4925	0.0004	1.6253	0.0002	3.6817	0
2.02	17.25	36.5	Q6W898|Q6W898_HUMAN	HSD-33 - Homo sapiens	1.0776	0.6892	1.352	0.1834	1.0151	0.9316
3.76	3.77	15.1	Q9Y6E3|Q9Y6E3_HUMAN	HSPC027 - Homo sapiens	0.9249	0.9276	1.3385	0.4985	3.6424	0.0506
15.1	15.1	76.5	Q53X54|Q53X54_HUMAN	HSPE1 protein (Fragment) - Homo sapiens	0.8678	0.0002	0.8206	0.0001	0.6312	0
7.78	7.8	31.9	Q96D96|Q96D96_HUMAN	Hydrogen voltage-gated channel 1 - Homo sapiens	0.7457	0.3049	0.521	0.2487	0.6043	0.2257
13.56	14.31	43	Q16836|HCDH_HUMAN	Hydroxyacyl-coenzyme A dehydrogenase, mitochondrial precursor - Homo sapiens	1.0254	0.7543	0.8731	0.038	0.6346	0
2.3	2.3	12.7	Q16775|GLO2_HUMAN	Hydroxyacylglutathione hydrolase - Homo sapiens	1.9746		1.3733
6.78	6.8	30.6	Q6YN16|HSDL2_HUMAN	Hydroxysteroid dehydrogenase-like protein 2 - Homo sapiens	0.9314	0.5587	0.78	0.0221	0.6329	0.0016
30.29	30.29	34.9	Q9Y4L1|HYOU1_HUMAN	Hypoxia up-regulated protein 1 precursor - Homo sapiens	0.983	0.8818	1.0934	0.4729	1.0812	0.245
6.14	6.15	43.2	Q14197|ICT1_HUMAN	Immature colon carcinoma transcript 1 protein precursor - Homo sapiens	1.0095	0.9044	0.9997	0.9955	0.9375	0.4143
1.7	1.7	15.9	Q9Y5U9|IR3IP_HUMAN	Immediate early response 3-interacting protein 1 - Homo sapiens	0.8146	0.4147	1.092	0.1952	0.9609	0.775
1.4	19.71	53	Q3B7X4|Q3B7X4_HUMAN	IMMT protein - Homo sapiens	0.641	0.0103	0.8012	0.0041	0.961	0.8045
1.71	1.74	16.2	O95976|IGSF6_HUMAN	Immunoglobulin superfamily member 6 precursor - Homo sapiens	0.9561	0.6887	0.4869	0.0011	0.5471	0.0026
8.41	8.44	24.8	Q15070|OXA1L_HUMAN	Inner membrane protein OXA1L, mitochondrial precursor - Homo sapiens	0.8804	0.2583	0.8187	0.0467	0.8526	0.0545
10.55	10.84	29	Q9H2U2|IPYR2_HUMAN	Inorganic pyrophosphatase 2, mitochondrial precursor - Homo sapiens	1.1153	0.2769	1.1299	0.1932	0.8586	0.2128
1.67	1.69	13.4	P12268|IMDH2_HUMAN	Inosine-5'-monophosphate dehydrogenase 2 - Homo sapiens	1.4122	0.2512	3.5111	0.0779	7.4987	0.0139
15.81	16.01	20.4	Q14643|ITPR1_HUMAN	Inositol 1,4,5-trisphosphate receptor type 1 - Homo sapiens	0.899	0.4265	0.9825	0.9468	0.9374	0.7519
5.41	8.02	17.9	Q14571|ITPR2_HUMAN	Inositol 1,4,5-trisphosphate receptor type 2 - Homo sapiens	0.9948	0.991	0.9945	0.9665	1.0748	0.7674
2.41	2.8	18.7	Q9NX62|IMPA3_HUMAN	Inositol monophosphatase 3 - Homo sapiens	1.1122	0.507	0.6244	0.0758	0.7284	0.1141
14.35	14.36	18.5	P08648|ITA5_HUMAN	Integrin alpha-5 precursor - Homo sapiens	1.3801	0.0027	1.0964	0.248	1.3241	0.0141
21.37	21.41	20	P20701|ITAL_HUMAN	Integrin alpha-L precursor - Homo sapiens	1.3717	0.0001	0.982	0.7298	1.2912	0.0007
2.21	2.25	9	P06756|ITAV_HUMAN	Integrin alpha-V precursor - Homo sapiens	1.2516		1.3895		1.0556
32.55	38.23	30.8	P20702|ITAX_HUMAN	Integrin alpha-X precursor - Homo sapiens	1.3285	0.0003	1.0245	0.6269	1.1153	0.0748
53.31	53.31	50.8	Q6PJ75|Q6PJ75_HUMAN	Integrin beta (Fragment) - Homo sapiens	1.2104	0	0.8883	0.0004	0.9895	0.7989
6.1	6.35	16.1	P05106|ITB3_HUMAN	Integrin beta-3 precursor - Homo sapiens	1.0346	0.8489	0.9305	0.6312	1.0799	0.7012
1.47	1.53	11.6	Q17R67|Q17R67_HUMAN	Integrin, alpha 2b - Homo sapiens
51.91	51.91	33.2	Q4VAK2|Q4VAK2_HUMAN	Integrin, alpha M - Homo sapiens	1.5002	0	1.1184	0.0402	1.3269	0.0001
14.71	14.84	17.8	Q8WUM6|Q8WUM6_HUMAN	Integrin, beta 1 - Homo sapiens	1.2949	0.0565	1.0733	0.2677	1.2857	0.0013
3.11	3.75	16.6	Q13418|ILK_HUMAN	Integrin-linked protein kinase - Homo sapiens	1.0593	0.6901	1.3705	0.1335	2.8785	0.0088
11.95	11.98	21.4	Q5NKV8|Q5NKV8_HUMAN	Intercellular adhesion molecule 1 - Homo sapiens	1.6492	0.0309	1.3318	0.0934	1.3731	0.1126
4.57	4.57	24	Q8WU77|Q8WU77_HUMAN	Interferon, gamma-inducible protein 30 - Homo sapiens	1.1417	0.3825	1.3738	0.046	1.3153	0.1861
1.6	3.46	22.8	Q5T7J1|Q5T7J1_HUMAN	Interferon-induced protein with tetratricopeptide repeats 1 - Homo sapiens	1.351	0.5448	1.9622	0.2607	3.6933	0.1205
4.61	4.67	21.7	Q8IZ03|Q8IZ03_HUMAN	Interferon-induced protein with tetratricopeptide repeats 2 - Homo sapiens					15.7536	0.0152
3.86	5.01	21.2	Q5T765|Q5T765_HUMAN	Interferon-induced protein with tetratricopeptide repeats 3 - Homo sapiens			6.7397	0.0086	17.6979	0.004
2	2.01	8.8	B0YJ28|B0YJ28_HUMAN	Interleukin-18 - Homo sapiens
4.77	4.79	19.5	Q1WMJ3|Q1WMJ3_HUMAN	Interleukin-4 induced protein-1 variant 2 - Homo sapiens	1.2121	0.3132	1.6492	0.0088	1.4429	0.0648
2.22	2.28	40.1	Q9H1K1|ISCU_HUMAN	Iron-sulfur cluster assembly enzyme ISCU, mitochondrial precursor - Homo sapiens	0.8245	0.0019	0.9531	0.4212	1.1223	0.0732
3.43	3.43	26.7	Q5SVA4|Q5SVA4_HUMAN	ISG15 ubiquitin-like modifier - Homo sapiens	1.3631	0.2285	3.5544	0.0267	5.6836	0.023
15.98	15.98	35	P50213|IDH3A_HUMAN	Isocitrate dehydrogenase [NAD] subunit alpha, mitochondrial precursor - Homo sapiens	0.8792	0.0717	0.9328	0.2461	0.739	0.0013
10.6	11.56	33	O43837|IDH3B_HUMAN	Isocitrate dehydrogenase [NAD] subunit beta, mitochondrial precursor - Homo sapiens	0.5729	0.0045	0.7779	0.1499	0.5811	0.0256
6.04	7.02	15.5	P51553|IDH3G_HUMAN	Isocitrate dehydrogenase [NAD] subunit gamma, mitochondrial precursor - Homo sapiens	0.8619	0.2635	1.026	0.8876	0.8954	0.5416
40.18	40.23	67.7	P48735|IDHP_HUMAN	Isocitrate dehydrogenase [NADP], mitochondrial precursor - Homo sapiens	1.0496	0.5269	0.9235	0.0873	0.7609	0
30.95	31.02	32	Q9NSE4|SYIM_HUMAN	Isoleucyl-tRNA synthetase, mitochondrial precursor - Homo sapiens	0.8672	0.0033	0.923	0.0595	0.7876	0.0003
10.77	10.77	20.3	P26440|IVD_HUMAN	Isovaleryl-CoA dehydrogenase, mitochondrial precursor - Homo sapiens	0.8134	0.0153	0.7453	0.0004	0.6623	0
2.05	2.09	13.2	Q7Z5N2|Q7Z5N2_HUMAN	Kangai 1 - Homo sapiens	1.4072	0.275	0.7394	0.208	0.9101	0.1252
1.58	28.54	43.7	Q9BYX7|ACTK_HUMAN	Kappa-actin - Homo sapiens	0.9592		0.7952		1.7231
2.12	2.16	9.7	Q53XN2|Q53XN2_HUMAN	Karyopherin (Importin) beta 1 - Homo sapiens					6.2266
2.02	2.05	12.8	Q7Z4H8|KDEL2_HUMAN	KDEL motif-containing protein 2 precursor - Homo sapiens	0.8751		1.0917		1.1868
9.75	9.85	16.7	P13645|K1C10_HUMAN	Keratin, type I cytoskeletal 10 - Homo sapiens	0.6898	0.0117	0.6866	0.0079	1.2635	0.0237
6.2	8.14	23.1	P35527|K1C9_HUMAN	Keratin, type I cytoskeletal 9 - Homo sapiens	1.0539	0.6311	1.1948	0.0943	5.3435	0
22.29	24.33	33.1	P04264|K2C1_HUMAN	Keratin, type II cytoskeletal 1 - Homo sapiens	0.8566	0.0143	0.8851	0.2324	3.0393	0
4.02	5.76	17.7	P02538|K2C6A_HUMAN	Keratin, type II cytoskeletal 6A - Homo sapiens	0.6249		0.6388		0.8993
2.22	3.89	16.6	Q14CN4|K2C72_HUMAN	Keratin, type II cytoskeletal 72 - Homo sapiens	1.1701		1.4424		1.5029
30.75	30.86	24.1	A3KMH1|A3KMH1_HUMAN	KIAA0564 protein (Fragment) - Homo sapiens	0.8171	0.0015	0.8104	0.0001	0.8045	0.0063
5.02	5.14	23.7	A4D229|A4D229_HUMAN	KIAA1228 protein - Homo sapiens	0.907	0.4935	1.1697	0.3116	0.9423	0.6412
8.49	8.83	21.7	Q86UP2|KTN1_HUMAN	Kinectin - Homo sapiens	0.936	0.3958	0.7152	0.0098	0.7371	0.0015
2.3	2.37	13.7	Q96G23|LASS2_HUMAN	LAG1 longevity assurance homolog 2 - Homo sapiens	1.119	0.4895	1.1513	0.3629	1.0484	0.7883
1.8	1.81	15.1	Q59G12|Q59G12_HUMAN	Lamina-associated polypeptide 2, isoforms beta/gamma variant (Fragment) - Homo sapiens
5.66	5.72	16.6	Q14739|LBR_HUMAN	Lamin-B receptor - Homo sapiens	0.8478	0.1551	0.8678	0.2224	1.0504	0.6784
4.75	8.79	31.6	P20700|LMNB1_HUMAN	Lamin-B1 - Homo sapiens	0.5205	0.0003	0.3178	0	0.3897	0.0002
5.22	5.25	14.5	P48449|ERG7_HUMAN	Lanosterol synthase - Homo sapiens	1.0436	0.8167	1.0202	0.7935	0.9364	0.6548
7.95	7.98	31.8	Q53FS4|Q53FS4_HUMAN	Lectin, mannose-binding, 1 variant (Fragment) - Homo sapiens	0.9956	0.9555	1.0037	0.966	1.0498	0.6248
25.23	25.28	36.7	O95202|LETM1_HUMAN	Leucine zipper-EF-hand-containing transmembrane protein 1, mitochondrial precursor - Homo sapiens	0.8724	0.0296	0.857	0.0169	0.7078	0
2.55	2.55	7.9	Q8N386|LRC25_HUMAN	Leucine-rich repeat-containing protein 25 precursor - Homo sapiens	1.3075	0.1244	0.9156	0.3387	1.0135	0.898
15.75	15.95	46.6	Q96AG4|LRC59_HUMAN	Leucine-rich repeat-containing protein 59 - Homo sapiens	0.8421	0.0061	0.9497	0.2295	0.8866	0.0384
3.75	3.9	13.1	Q8TDW0|LRC8C_HUMAN	Leucine-rich repeat-containing protein 8C - Homo sapiens	1.1418	0.44	0.8841	0.4956	1.0725	0.6627
10.41	16.83	44.2	Q9UIP6|Q9UIP6_HUMAN	Leucocyte antigen B - Homo sapiens	1.1446	0.0798	0.9494	0.2566	0.8272	0.012
7.16	7.28	10.8	Q9UIQ6|LCAP_HUMAN	Leucyl-cystinyl aminopeptidase - Homo sapiens	0.8845	0.2322	0.871	0.3554	0.8236	0.3928
2.2	7.69	34.9	Q29884|Q29884_HUMAN	Leukocyte antigen-DQ beta chain precursor - Homo sapiens	1.1676	0.3349	1.0461	0.8675	0.9936	0.925
42.35	42.45	30	P08575|CD45_HUMAN	Leukocyte common antigen precursor - Homo sapiens	1.457	0	1.106	0.1438	1.2419	0.0011
1.54	1.83	12.4	O75022|LIRB3_HUMAN	Leukocyte immunoglobulin-like receptor subfamily B member 3 precursor - Homo sapiens	1.0422	0.6888	0.6642	0.1191	0.7943	0.3885
4.19	4.19	10.5	Q8NHJ6|LIRB4_HUMAN	Leukocyte immunoglobulin-like receptor subfamily B member 4 precursor - Homo sapiens	1.1267		0.9367		1.316
6.12	6.13	19.5	Q08722|CD47_HUMAN	Leukocyte surface antigen CD47 precursor - Homo sapiens	1.4177	0.0133	1.1751	0.102	1.3716	0.0042
2	2	3.7	P19397|CD53_HUMAN	Leukocyte surface antigen CD53 - Homo sapiens	1.784	0.0341	1.3904	0.3432	1.8036	0.0119
5.9	5.9	14.8	P16150|LEUK_HUMAN	Leukosialin precursor - Homo sapiens	2.0192	0.0001	1.3974	0.0275	1.9395	0.0017
12.28	12.28	48	Q6IBA7|Q6IBA7_HUMAN	LGALS3 protein - Homo sapiens	1.0701	0.2326	0.9735	0.6648	0.7706	0.0024
2	2	3.9	Q6ZUX7|LHPL2_HUMAN	Lipoma HMGIC fusion partner-like 2 protein - Homo sapiens	0.8379		0.4622		0.2909
23.26	23.26	35.4	P23141|EST1_HUMAN	Liver carboxylesterase 1 precursor - Homo sapiens	0.8799	0.026	1.0343	0.5874	0.934	0.3952
5.53	5.63	23.1	Q5U077|Q5U077_HUMAN	L-lactate dehydrogenase - Homo sapiens	1.0021	0.9884	1.4916	0.3975	1.31	0.0957
2.41	4.49	14.5	P00338|LDHA_HUMAN	L-lactate dehydrogenase A chain - Homo sapiens	1.1936	0.1072	1.498	0.0659	1.1463	0.3521
35.38	35.44	39.3	P36776|LONM_HUMAN	Lon protease homolog, mitochondrial precursor - Homo sapiens	0.85	0.0003	0.8597	0.0003	0.8183	0
4.03	4.13	20.6	Q6PCB7|S27A1_HUMAN	Long-chain fatty acid transport protein 1 - Homo sapiens	0.8507	0.195	0.7311	0.1557	0.7725	0.5292
9.88	9.88	23.4	Q5K4L6|S27A3_HUMAN	Long-chain fatty acid transport protein 3 - Homo sapiens	1.0493	0.4557	1.1955	0.0118	1.2479	0.008
21.21	21.22	33.2	P33121|ACSL1_HUMAN	Long-chain-fatty-acid--CoA ligase 1 - Homo sapiens	1.0452	0.4687	0.9868	0.8354	1.0798	0.21
15.84	15.89	27.4	O95573|ACSL3_HUMAN	Long-chain-fatty-acid--CoA ligase 3 - Homo sapiens	1.1194	0.3684	1.3673	0.0579	1.4035	0.0306
4.8	7.35	20.4	O60488|ACSL4_HUMAN	Long-chain-fatty-acid--CoA ligase 4 - Homo sapiens	0.9022	0.322	0.9207	0.4124	1.1181	0.2406
2	2	7.4	P31995|FCG2C_HUMAN	Low affinity immunoglobulin gamma Fc region receptor II-c precursor - Homo sapiens	1.2537	0.2301	0.9462	0.8975	1.1834	0.2916
2.14	2.15	9	Q6IAT6|Q6IAT6_HUMAN	LTA4H protein - Homo sapiens
6.8	6.8	27	Q7Z4W1|DCXR_HUMAN	L-xylulose reductase - Homo sapiens	1.0837	0.4838	1.133	0.4569	1.0765	0.6287
20.86	20.89	30.9	Q5TBN4|Q5TBN4_HUMAN	Lymphocyte cytosolic protein 1 - Homo sapiens	1.6175	0	1.8579	0	3.3255	0
10.62	10.63	44	Q53H48|Q53H48_HUMAN	Lymphocyte-specific protein 1 variant (Fragment) - Homo sapiens	1.4652	0.0043	1.0777	0.3748	1.6235	0.041
12.03	12.09	32	Q6NUK7|Q6NUK7_HUMAN	LYN protein (Fragment) - Homo sapiens	1.0862	0.5894	1.0876	0.5855	1.3973	0.0719
2.14	2.19	13.5	Q6IAQ1|Q6IAQ1_HUMAN	LYPLA1 protein - Homo sapiens	1.0886		1.137		0.7273
2	2.02	25	Q9NU23|LYRM2_HUMAN	LYR motif-containing protein 2 - Homo sapiens	1.4144		1.1558		0.5214
1.68	1.91	26.9	Q5U5X0|LYRM7_HUMAN	LYR motif-containing protein 7 - Homo sapiens	1.2759	0.0516	0.8407	0.3661	0.8485	0.4167
2.12	2.14	9.9	Q6P1A2|MBOA5_HUMAN	Lysophosphatidylcholine acyltransferase - Homo sapiens	0.7346		0.9271		0.7704
19.54	19.55	30.5	Q7L5N7|PCAT2_HUMAN	Lysophosphatidylcholine acyltransferase 2 - Homo sapiens	1.046	0.3967	1.2879	0.0001	1.3681	0
3.02	3.03	14.9	P11117|PPAL_HUMAN	Lysosomal acid phosphatase precursor - Homo sapiens	1.1115	0.312	1.1663	0.2339	0.9438	0.5849
7.73	7.77	13.7	P10253|LYAG_HUMAN	Lysosomal alpha-glucosidase precursor - Homo sapiens	1.2158	0.0222	1.7257	0	1.3897	0.0001
4.04	4.16	12	Q9UD93|Q9UD93_HUMAN	Lysosomal membrane glycoprotein LAMP-2 homolog - Homo sapiens	0.9195	0.8366	1.28	0.2613	1.6194	0.086
3.7	3.73	14.5	P42785|PCP_HUMAN	Lysosomal Pro-X carboxypeptidase precursor - Homo sapiens	1.1442	0.4409	1.5492	0.0761	1.5295	0.0384
13.78	13.78	29.6	P11279|LAMP1_HUMAN	Lysosome-associated membrane glycoprotein 1 precursor - Homo sapiens	1.1514	0.0366	1.1184	0.1225	0.8762	0.008
7.71	7.72	28.8	Q8N6Z9|Q8N6Z9_HUMAN	Lysosome-associated membrane protein-3 variant - Homo sapiens	0.9404	0.1052	0.7806	0	0.6874	0
12.99	12.99	61.5	P61626|LYSC_HUMAN	Lysozyme C precursor - Homo sapiens	0.7964	0.0003	0.5705	0	0.4301	0
5.56	5.57	20.6	Q6I9U3|Q6I9U3_HUMAN	M6PR protein - Homo sapiens	1.0017	0.9858	0.9209	0.5307	1.2769	0.0996
8.59	8.6	24.8	P21757|MSRE_HUMAN	Macrophage scavenger receptor types I and II - Homo sapiens	0.8806	0.0963	0.624	0	0.569	0.0006
2.2	2.23	12.6	Q9HD23|MRS2_HUMAN	Magnesium transporter MRS2 homolog, mitochondrial precursor - Homo sapiens	0.7384	0.0565	0.758	0.0292	0.6614	0.1152
3.19	3.19	16.9	Q14728|MFS10_HUMAN	Major facilitator superfamily domain-containing protein 10 - Homo sapiens	0.9658	0.8394	1.2326	0.2935	0.9599	0.7631
2.15	18.03	43.9	Q5SUL4|Q5SUL4_HUMAN	Major histocompatibility complex, class I, A - Homo sapiens	1.377	0.0152	1.0003	0.9987	1.1691	0.3653
10.76	11.51	29.8	Q5SQ73|Q5SQ73_HUMAN	Major histocompatibility complex, class II, DP beta 1 - Homo sapiens	1.1754	0.1643	1.0459	0.7601	0.9848	0.9127
6.14	6.19	30.1	Q5SP06|Q5SP06_HUMAN	Major histocompatibility complex, class II, DR alpha - Homo sapiens	0.9568	0.2358	0.7349	0.0051	0.8253	0.0245
2	2.01	9.7	Q86XR1|Q86XR1_HUMAN	Major prion protein (Fragment) - Homo sapiens
3.8	3.83	9.5	Q14764|MVP_HUMAN	Major vault protein - Homo sapiens	1.7057	0.1305	1.7548	0.3405	5.7906	0.0078
38.12	38.12	76.6	A8K414|A8K414_HUMAN	Malate dehydrogenase - Homo sapiens	0.8444	0.001	0.8678	0.0014	0.5696	0
1.33	1.34	22.2	P40925|MDHC_HUMAN	Malate dehydrogenase, cytoplasmic - Homo sapiens	1.0457		1.1368		0.9057
2.1	2.17	19.1	O95822|DCMC_HUMAN	Malonyl-CoA decarboxylase, mitochondrial precursor - Homo sapiens	1.0913	0.4139	1.077	0.6384	1.1018	0.6132
58.31	58.32	36.5	Q5VSK2|Q5VSK2_HUMAN	Mannose receptor C type 1-like protein 1 - Homo sapiens	1.0753	0.0393	0.7101	0	0.532	0
3.41	3.41	24.7	O60664|M6PBP_HUMAN	Mannose-6-phosphate receptor-binding protein 1 - Homo sapiens	0.8722	0.0433	1.1432	0.5899	1.3688	0.4048
7.1	7.17	20.2	Q9BUU8|Q9BUU8_HUMAN	Mannose-P-dolichol utilization defect 1 - Homo sapiens	0.8269	0.2587	0.9547	0.798	0.9751	0.8465
30.94	30.99	34.1	Q59E90|Q59E90_HUMAN	Mannosidase, alpha, class 2B, member 1 variant (Fragment) - Homo sapiens	1.1633	0.0469	1.6134	0	1.4036	0.0025
3.07	3.11	13.8	P33908|MA1A1_HUMAN	Mannosyl-oligosaccharide 1,2-alpha-mannosidase IA - Homo sapiens	1.0059	0.9246	0.4129	0.0024	0.4778	0.0051
3.58	3.59	17.6	Q8IX19|MCEM1_HUMAN	Mast cell-expressed membrane protein 1 - Homo sapiens	1.2752	0.0614	0.9799	0.8456	1.2973	0.0326
4.45	4.87	12.7	P50281|MMP14_HUMAN	Matrix metalloproteinase-14 precursor - Homo sapiens	0.9181	0.5255	0.8559	0.4857	1.0306	0.8616
6.04	6.06	12.3	P14780|MMP9_HUMAN	Matrix metalloproteinase-9 precursor - Homo sapiens	0.7311	0	0.2962	0.0003	0.277	0
12.26	12.26	48.8	P63233|M1_I72A2	Matrix protein 1 - Influenza A virus (strain A/Udorn/307/1972 H3N2)	2.4154	0.0164	8.1686	0	16.6169	0
2.01	2.04	13	P42679|MATK_HUMAN	Megakaryocyte-associated tyrosine-protein kinase - Homo sapiens
7.49	7.63	14.1	Q5JRA6|MIA3_HUMAN	Melanoma inhibitory activity protein 3 precursor - Homo sapiens	0.8833	0.1581	0.8854	0.4088	0.9475	0.6242
47.47	47.47	34.3	Q59E93|Q59E93_HUMAN	Membrane alanine aminopeptidase variant (Fragment) - Homo sapiens	1.4011	0	1.2789	0.0017	1.2576	0.003
10.11	10.11	32.7	O15173|PGRC2_HUMAN	Membrane-associated progesterone receptor component 2 - Homo sapiens	1.1172	0.4172	1.3072	0.0298	1.3146	0.0225
2.36	2.46	14.2	Q96N66|MBOA7_HUMAN	Membrane-bound O-acyltransferase domain-containing protein 7 - Homo sapiens	0.9126	0.6316	1.106	0.5882	1.007	0.9638
12.33	12.36	38.5	Q14696|MESD2_HUMAN	Mesoderm development candidate 2 - Homo sapiens	0.9534	0.6763	0.9951	0.9604	0.8856	0.2764
3.1	3.12	13.9	Q658P3|STEA3_HUMAN	Metalloreductase STEAP3 - Homo sapiens	1.303	0.2375	0.8438	0.4307	0.9237	0.7892
6.67	6.71	31.8	B1AVR9|B1AVR9_HUMAN	Metaxin 1 - Homo sapiens	0.9783	0.8187	0.9487	0.3632	0.8191	0.043
2.56	2.56	13.4	Q8IZ68|Q8IZ68_HUMAN	Metaxin 2 - Homo sapiens	0.8803	0.3928	0.8015	0.1705	0.7958	0.1484
2.57	2.58	22.9	Q9HCC0|MCCB_HUMAN	Methylcrotonoyl-CoA carboxylase beta chain, mitochondrial precursor - Homo sapiens	0.964	0.6728	0.8853	0.1655	0.7815	0.0507
2.16	2.32	13.8	Q96RQ3|MCCA_HUMAN	Methylcrotonoyl-CoA carboxylase subunit alpha, mitochondrial precursor - Homo sapiens	0.9198	0.6234	0.8988	0.6715	0.9241	0.6326
2.01	2.06	7.7	Q8IVH4|MMAA_HUMAN	Methylmalonic aciduria type A protein, mitochondrial precursor - Homo sapiens	0.4	0.0125	0.5037	0.0165	0.3087	0.0088
1.52	1.53	8	Q96PE7|MCEE_HUMAN	Methylmalonyl-CoA epimerase, mitochondrial precursor - Homo sapiens
5.99	6.12	19.9	P22033|MUTA_HUMAN	Methylmalonyl-CoA mutase, mitochondrial precursor - Homo sapiens	0.8534	0.014	0.8408	0.0481	0.6391	0.0002
2.29	2.3	13.7	Q6IBE3|Q6IBE3_HUMAN	MGAT1 protein - Homo sapiens	1.0807	0.1903	0.7437	0.0483	0.7251	0.019
2.38	2.38	19.2	Q6GMR2|Q6GMR2_HUMAN	MGC70857 protein - Homo sapiens	0.8352	0.122	0.6297	0.125	0.6405	0.2433
2.21	2.23	18.1	Q6LET6|Q6LET6_HUMAN	MGST1 protein (Fragment) - Homo sapiens
22.17	22.17	60.8	A7M780|A7M780_HUMAN	MHC class I antigen (Fragment) - Homo sapiens	1.7219	0.2101	1.609	0.2081	1.5487	0.283
3.89	15.38	52.7	Q6F3H8|Q6F3H8_HUMAN	MHC class I antigen (Fragment) - Homo sapiens	1.0882	0.535	0.8532	0.0935	0.9824	0.8868
6.16	18.87	52.2	Q6R741|Q6R741_HUMAN	MHC class I antigen precursor (Fragment) - Homo sapiens	0.9153	0.1914	0.7785	0.3673	0.8448	0.7558
8.88	8.9	38.7	Q5Y7F6|Q5Y7F6_HUMAN	MHC class II antigen - Homo sapiens
1.36	8.28	48.4	Q3LAB3|Q3LAB3_HUMAN	MHC class II antigen (Fragment) - Homo sapiens	0.9513	0.6026	0.7607	0.0377	0.8777	0.1495
2	2	12.9	Q99735|MGST2_HUMAN	Microsomal glutathione S-transferase 2 - Homo sapiens
5.52	5.57	21.1	Q5VV89|Q5VV89_HUMAN	Microsomal glutathione S-transferase 3 - Homo sapiens	0.9172	0.2422	0.9913	0.902	0.9336	0.2334
2	3.02	52.3	Q596K9|Q596K9_HUMAN	Migration-inducing protein 12 - Homo sapiens
4.7	4.72	42.6	Q8N183|MIMIT_HUMAN	Mimitin, mitochondrial precursor - Homo sapiens	0.9415	0.7754	1.126	0.5958	0.743	0.0256
11.91	11.94	17.2	Q8TCT9|HM13_HUMAN	Minor histocompatibility antigen H13 - Homo sapiens	0.8812	0.0468	1.0398	0.391	1.0556	0.1958
2	2.04	17.5	Q9UDX5|MTP18_HUMAN	Mitochondrial 18 kDa protein - Homo sapiens	1.2424	0.3106	0.9362	0.5332	0.6937	0.0404
2.99	3	30.1	Q9Y399|RT02_HUMAN	Mitochondrial 28S ribosomal protein S2 - Homo sapiens	1.2719	0.0017	1.1092	0.3968	1.0634	0.6389
10.3	10.35	25.8	P82650|RT22_HUMAN	Mitochondrial 28S ribosomal protein S22 - Homo sapiens	0.8044	0.0491	0.7477	0.0715	0.6243	0.0083
2	2	12.7	P82663|RT25_HUMAN	Mitochondrial 28S ribosomal protein S25 - Homo sapiens
5.1	5.11	27.3	Q9Y2Q9|RT28_HUMAN	Mitochondrial 28S ribosomal protein S28 - Homo sapiens	1.1289		1.6203		1.9754
4.04	4.15	22.3	Q9NP92|RT30_HUMAN	Mitochondrial 28S ribosomal protein S30 - Homo sapiens	1.0083	0.9216	0.9277	0.4092	0.7493	0.0253
2.01	2.31	36.8	Q9Y291|RT33_HUMAN	Mitochondrial 28S ribosomal protein S33 - Homo sapiens
5.44	5.44	25.2	P82930|RT34_HUMAN	Mitochondrial 28S ribosomal protein S34 - Homo sapiens	0.9413	0.6163	0.8842	0.1297	0.6835	0.1236
4.01	4.02	44.7	P82909|RT36_HUMAN	Mitochondrial 28S ribosomal protein S36 - Homo sapiens	0.8261	0.3042	1.0003	0.9968	0.8975	0.7158
5.88	5.91	41.6	P82932|RT06_HUMAN	Mitochondrial 28S ribosomal protein S6 - Homo sapiens	0.9939	0.9157	0.8211	0.0788	0.5994	0.0173
2.88	2.89	18.2	Q9P0M9|RM27_HUMAN	Mitochondrial 39S ribosomal protein L27 - Homo sapiens	1.0077	0.9372	1.0624	0.4477	1.1411	0.2404
10.34	10.36	38.2	Q9NYK5|RM39_HUMAN	Mitochondrial 39S ribosomal protein L39 - Homo sapiens	1.0032	0.9461	0.833	0.0062	0.6876	0.0011
6.3	6.31	25.7	Q9BYD3|RM04_HUMAN	Mitochondrial 39S ribosomal protein L4 - Homo sapiens	0.9439	0.6895	0.931	0.5962	0.7937	0.1029
4.34	4.7	31.9	Q13405|RM49_HUMAN	Mitochondrial 39S ribosomal protein L49 - Homo sapiens	1.2013	0.5752	0.9367	0.8287	1.1345	0.7541
5.77	5.77	25.9	Q8N5N7|RM50_HUMAN	Mitochondrial 39S ribosomal protein L50 - Homo sapiens	0.6246	0.3677	0.7812	0.2275	0.3882	0.2159
28.98	29.07	48.4	Q53FB6|Q53FB6_HUMAN	Mitochondrial aldehyde dehydrogenase 2 variant (Fragment) - Homo sapiens	0.9807	0.8851	0.9393	0.4171	0.6995	0
11.16	11.18	35.9	O43772|MCAT_HUMAN	Mitochondrial carnitine/acylcarnitine carrier protein - Homo sapiens	1.1003	0.3091	0.9878	0.8989	0.843	0.136
3.32	3.32	25.7	Q8N8R3|MCATL_HUMAN	Mitochondrial carnitine/acylcarnitine carrier protein CACL - Homo sapiens	0.9844	0.895	0.8931	0.6256	0.8431	0.6465
10.59	10.64	34.3	Q9Y6C9|MTCH2_HUMAN	Mitochondrial carrier homolog 2 - Homo sapiens	1.173	0.0416	0.9073	0.4529	0.896	0.28
9.32	9.35	29.4	Q9HC21|DNC_HUMAN	Mitochondrial deoxynucleotide carrier - Homo sapiens	1.1665	0.3944	1.0361	0.8499	0.7988	0.5251
2.83	2.88	30.7	Q9UBX3|DIC_HUMAN	Mitochondrial dicarboxylate carrier - Homo sapiens	1.1646	0.371	1.2371	0.3652	1.2476	0.396
6.33	6.34	21.4	Q9H936|GHC1_HUMAN	Mitochondrial glutamate carrier 1 - Homo sapiens	1.4033	0.0133	1.2035	0.2156	1.1637	0.3201
2.44	2.47	44.4	P62072|TIM10_HUMAN	Mitochondrial import inner membrane translocase subunit Tim10 - Homo sapiens	0.9518	0.7165	0.8212	0.0984	0.5282	0.0275
3.1	3.11	33.7	Q9Y5L4|TIM13_HUMAN	Mitochondrial import inner membrane translocase subunit Tim13 - Homo sapiens
4.05	4.05	37.1	Q96DA6|TIM14_HUMAN	Mitochondrial import inner membrane translocase subunit TIM14 - Homo sapiens	1.0163	0.8373	0.9053	0.3417	0.7612	0.0101
3.35	3.35	39.7	O14925|TIM23_HUMAN	Mitochondrial import inner membrane translocase subunit Tim23 - Homo sapiens
1.77	1.78	25.3	Q9Y5J9|TIM8B_HUMAN	Mitochondrial import inner membrane translocase subunit Tim8 B - Homo sapiens	0.7912	0.4162	0.4492	0.0757	0.3006	0.0861
2	2	16.9	Q9Y5J7|TIM9_HUMAN	Mitochondrial import inner membrane translocase subunit Tim9 - Homo sapiens	1.0025	0.9896	0.9393	0.5749	0.5898	0.0078
4.06	4.11	26.9	Q15388|TOM20_HUMAN	Mitochondrial import receptor subunit TOM20 homolog - Homo sapiens	0.8435	0.067	0.9092	0.3568	0.8457	0.0706
4	4.03	15.5	Q9NS69|TOM22_HUMAN	Mitochondrial import receptor subunit TOM22 homolog - Homo sapiens
8.59	8.61	16.9	O96008|TOM40_HUMAN	Mitochondrial import receptor subunit TOM40 homolog - Homo sapiens	1.2221	0.0825	0.9246	0.5015	0.8526	0.4555
62.62	62.67	67.5	Q16891|IMMT_HUMAN	Mitochondrial inner membrane protein - Homo sapiens	0.9451	0.3472	0.9513	0.3241	0.8817	0.0319
3.6	3.67	20.3	Q99797|MIPEP_HUMAN	Mitochondrial intermediate peptidase, mitochondrial precursor - Homo sapiens	0.8843	0.3604	0.8257	0.2665	0.6408	0.0531
4.19	4.55	16.2	Q8N4Q1|MIA40_HUMAN	Mitochondrial intermembrane space import and assembly protein 40 - Homo sapiens	0.9748	0.8233	0.8706	0.3704	0.5687	0.0244
24.08	24.09	41.4	O94826|TOM70_HUMAN	Mitochondrial precursor proteins import receptor - Homo sapiens	0.9921	0.9309	0.9318	0.3109	0.8418	0.0752
3.25	4.41	14.1	Q8IXI2|MIRO1_HUMAN	Mitochondrial Rho GTPase 1 - Homo sapiens	1.4321		0.9725		1.2831
2.27	5.46	10.8	Q8IXI1|MIRO2_HUMAN	Mitochondrial Rho GTPase 2 - Homo sapiens	1.0223	0.7922	0.7712	0.0313	0.8796	0.0542
1.52	1.53	18.6	Q9BQC6|RT63_HUMAN	Mitochondrial ribosomal protein 63 - Homo sapiens	0.811	0.0801	0.6802	0.0406	0.6342	0.001
5.62	5.62	36	Q5QPA5|Q5QPA5_HUMAN	Mitochondrial ribosomal protein S18A (Fragment) - Homo sapiens	0.8738	0.1997	0.8215	0.0709	0.7118	0.0353
1.54	1.55	20.7	Q5TB11|Q5TB11_HUMAN	Mitochondrial ribosomal protein S21 - Homo sapiens
7.97	7.98	31.1	Q9Y3D9|RT23_HUMAN	Mitochondrial ribosomal protein S23 - Homo sapiens	1.0871	0.5104	1.1294	0.1814	0.8724	0.1529
7.92	8.01	28.3	Q6P1S1|Q6P1S1_HUMAN	Mitochondrial ribosomal protein S27 - Homo sapiens	0.8226	0.3401	0.7933	0.1586	0.6401	0.0321
7.07	7.16	27.8	Q6PG40|Q6PG40_HUMAN	Mitochondrial ribosomal protein S9 - Homo sapiens	1.3463	0.4142	1.887	0.2603	1.7526	0.3263
9.8	10.3	30.9	O75439|MPPB_HUMAN	Mitochondrial-processing peptidase subunit beta, mitochondrial precursor - Homo sapiens	0.9337	0.2497	0.8085	0.0086	0.5391	0.0001
4.71	4.83	14	O95140|MFN2_HUMAN	Mitofusin-2 - Homo sapiens	1.002	0.9925	0.8141	0.0954	0.7508	0.0077
27.85	27.88	35.9	P26038|MOES_HUMAN	Moesin - Homo sapiens	1.7854	0	1.5683	0	1.6231	0
12.61	12.61	18.3	O15427|MOT4_HUMAN	Monocarboxylate transporter 4 - Homo sapiens	1.4077	0.0426	0.9233	0.4655	0.9982	0.993
4.18	4.19	16.2	Q8NHP6|MSPD2_HUMAN	Motile sperm domain-containing protein 2 - Homo sapiens	0.9503	0.4915	1.0167	0.9366	1.0296	0.8664
2.53	2.59	16.8	Q6FHN9|Q6FHN9_HUMAN	MPST protein (Fragment) - Homo sapiens	0.9581	0.795	0.9992	0.9882	1.0878	0.481
4.24	4.33	22.7	Q6IBT2|Q6IBT2_HUMAN	MRPL3 protein - Homo sapiens	1.1705	0.2602	1.199	0.2935	1.2917	0.3071
4.81	4.81	25.4	A4FVA6|A4FVA6_HUMAN	MTCH1 protein (Fragment) - Homo sapiens	1.2211	0.3835	1.1965	0.4132	1.376	0.1173
8.1	8.19	32.4	Q5VUU6|Q5VUU6_HUMAN	Myeloid cell nuclear differentiation antigen - Homo sapiens	1.2724	0.0062	1.6837	0.0001	2.3133	0
3.99	3.99	12.7	Q96S97|MYADM_HUMAN	Myeloid-associated differentiation marker - Homo sapiens	1.1656	0.2213	0.7663	0.0559	0.8585	0.6422
8.73	8.75	16.9	P05164|PERM_HUMAN	Myeloperoxidase precursor - Homo sapiens	1.0548	0.4586	1.546	0	1.1687	0.01
2.18	2.57	15.7	Q4LE56|Q4LE56_HUMAN	MYO1C variant protein (Fragment) - Homo sapiens	1.387	0.6875	1.3339	0.7593	1.6046	0.6013
10.07	10.28	22.1	B0I1T2|B0I1T2_HUMAN	MYO1G variant protein - Homo sapiens	1.2005	0.237	0.8889	0.4754	0.9737	0.8297
105.26	105.35	40.8	Q9NZM1|MYOF_HUMAN	Myoferlin - Homo sapiens	1.1308	0.0001	0.9471	0.048	1.0106	0.7346
9.7	9.7	46.2	Q53X45|Q53X45_HUMAN	Myosin regulatory light chain - Homo sapiens	1.0929	0.2014	1.0733	0.3443	1.9109	0
13.81	13.82	66.9	Q561V9|Q561V9_HUMAN	Myosin, light chain 6, alkali, smooth muscle and non-muscle - Homo sapiens	1.0188	0.7745	1.1855	0.0314	2.0625	0
14.1	14.24	29.7	O00160|MYO1F_HUMAN	Myosin-If - Homo sapiens	1.3873	0.006	1.6891	0.0021	2.7161	0
4.14	4.82	15.5	Q9Y4I1|MYO5A_HUMAN	Myosin-Va - Homo sapiens
5.51	5.52	16.3	P34059|GALNS_HUMAN	N-acetylgalactosamine-6-sulfatase precursor - Homo sapiens	1.0936	0.3112	1.1169	0.2431	1.0514	0.5884
9.13	9.27	24.4	Q86SF2|GALT7_HUMAN	N-acetylgalactosaminyltransferase 7 - Homo sapiens	1.1233	0.2259	0.6368	0.014	0.6429	0.0214
3.48	3.51	14.4	Q9UK23|NAGPA_HUMAN	N-acetylglucosamine-1-phosphodiester alpha-N-acetylglucosaminidase precursor - Homo sapiens
1.41	1.41	12.1	Q9UJJ9|GNPTG_HUMAN	N-acetylglucosamine-1-phosphotransferase subunit gamma precursor - Homo sapiens	0.9534	0.5998	0.5052	0.0195	0.6652	0.0866
3	3.09	11.8	Q3T906|GNPTA_HUMAN	N-acetylglucosamine-1-phosphotransferase subunits alpha/beta precursor - Homo sapiens	1.003	0.986	0.6972	0.0073	0.7878	0.071
12.85	12.95	28.1	P15586|GNS_HUMAN	N-acetylglucosamine-6-sulfatase precursor - Homo sapiens	1.0739	0.365	1.1658	0.0874	0.9712	0.7228
2.25	2.26	9.5	Q02083|ASAHL_HUMAN	N-acylethanolamine-hydrolyzing acid amidase precursor - Homo sapiens	1.0757	0.5762	1.0461	0.4337	0.8916	0.1834
14.8	15.1	30.1	P23368|MAOM_HUMAN	NAD-dependent malic enzyme, mitochondrial precursor - Homo sapiens	0.8827	0.0088	0.7952	0.0004	0.6314	0
10.6	10.62	26.6	Q5VTW0|Q5VTW0_HUMAN	NADH dehydrogenase (Ubiquinone) Fe-S protein 2, 49kDa - Homo sapiens	1.005	0.9685	0.9502	0.6498	0.8465	0.1104
6.53	6.54	37.1	Q53FM7|Q53FM7_HUMAN	NADH dehydrogenase (Ubiquinone) Fe-S protein 3, 30kDa (NADH-coenzyme Q reductase) variant (Fragment) - Homo sapiens	0.9282	0.3387	1.0442	0.6619	0.9368	0.5652
5.38	5.45	28.5	Q8WU60|Q8WU60_HUMAN	NADH dehydrogenase (Ubiquinone) flavoprotein 3, 10kDa - Homo sapiens	0.7846	0.0656	0.7504	0.0307	0.6878	0.0182
4.27	4.98	23.4	Q9UI09|NDUAC_HUMAN	NADH dehydrogenase [ubiquinone] 1 alpha subcomplex subunit 12 - Homo sapiens	0.7657	0.0763	0.7912	0.0203	0.7249	0.0194
4.04	4.04	37.5	Q9P0J0|NDUAD_HUMAN	NADH dehydrogenase [ubiquinone] 1 alpha subcomplex subunit 13 - Homo sapiens	0.9026	0.3051	0.7616	0.0341	0.7207	0.0373
4.06	4.11	45.5	O43678|NDUA2_HUMAN	NADH dehydrogenase [ubiquinone] 1 alpha subcomplex subunit 2 - Homo sapiens	0.9482	0.5301	0.7285	0.0459	0.6844	0.0119
5.06	5.06	44.4	O00483|NDUA4_HUMAN	NADH dehydrogenase [ubiquinone] 1 alpha subcomplex subunit 4 - Homo sapiens	0.9036	0.2597	0.7022	0.0001	0.5111	0
2.92	2.96	39.5	P51970|NDUA8_HUMAN	NADH dehydrogenase [ubiquinone] 1 alpha subcomplex subunit 8 - Homo sapiens	0.9984	0.9893	0.7159	0.0026	0.7171	0.0054
8.53	8.55	30.2	Q16795|NDUA9_HUMAN	NADH dehydrogenase [ubiquinone] 1 alpha subcomplex subunit 9, mitochondrial precursor - Homo sapiens	0.9015	0.2901	0.7641	0.0147	0.7826	0.0918
6.24	6.25	35.5	O96000|NDUBA_HUMAN	NADH dehydrogenase [ubiquinone] 1 beta subcomplex subunit 10 - Homo sapiens	0.6759	0.2314	0.7244	0.165	0.5001	0.1227
6.02	6.02	36.6	Q9NX14|NDUBB_HUMAN	NADH dehydrogenase [ubiquinone] 1 beta subcomplex subunit 11, mitochondrial precursor - Homo sapiens
2.12	2.12	34.3	O95178|NDUB2_HUMAN	NADH dehydrogenase [ubiquinone] 1 beta subcomplex subunit 2, mitochondrial precursor - Homo sapiens	1.0534	0.1144	0.6914	0.1039	0.6429	0.146
4.01	4.12	53.5	O95168|NDUB4_HUMAN	NADH dehydrogenase [ubiquinone] 1 beta subcomplex subunit 4 - Homo sapiens	1.0108	0.9691	0.9225	0.7887	0.8233	0.6891
5.53	5.59	39.8	O95139|NDUB6_HUMAN	NADH dehydrogenase [ubiquinone] 1 beta subcomplex subunit 6 - Homo sapiens	1.0379	0.6089	0.9875	0.8829	0.7421	0.0174
2.85	2.85	22.6	O95169|NDUB8_HUMAN	NADH dehydrogenase [ubiquinone] 1 beta subcomplex subunit 8, mitochondrial precursor - Homo sapiens	0.9293	0.4096	0.809	0.1422	0.8342	0.0695
8.77	8.79	37.4	Q9Y6M9|NDUB9_HUMAN	NADH dehydrogenase [ubiquinone] 1 beta subcomplex subunit 9 - Homo sapiens	0.7834	0.2177	0.6723	0.0049	0.6172	0.047
2.11	2.18	26.9	O43181|NDUS4_HUMAN	NADH dehydrogenase [ubiquinone] iron-sulfur protein 4, mitochondrial precursor - Homo sapiens	0.9179	0.4468	1.0247	0.4775	0.8383	0.0701
9.71	9.75	42.6	Q9UHQ9|NB5R1_HUMAN	NADH-cytochrome b5 reductase 1 - Homo sapiens	0.9545	0.5547	1.0237	0.7781	0.9219	0.3012
10.49	10.49	35.9	P00387|NB5R3_HUMAN	NADH-cytochrome b5 reductase 3 - Homo sapiens	1.0185	0.7832	0.941	0.4709	0.9865	0.8847
15.92	16.13	27	P28331|NDUS1_HUMAN	NADH-ubiquinone oxidoreductase 75 kDa subunit, mitochondrial precursor - Homo sapiens	0.9247	0.1392	0.8694	0.0681	0.7965	0.0016
2.02	2.02	5.9	Q305G4|Q305G4_HUMAN	NADH-ubiquinone oxidoreductase chain 4 - Homo sapiens	1.0481	0.8419	1.2184		0.8448	0.4979
3.38	3.38	33.3	Q6FGG4|Q6FGG4_HUMAN	NDUFA3 protein - Homo sapiens	1.0256	0.7797	0.7296	0.0349	0.6425	0.0439
4.31	4.38	46.9	Q6FGW0|Q6FGW0_HUMAN	NDUFA6 protein (Fragment) - Homo sapiens	0.8617	0.2858	0.8753	0.5801	0.6436	0.004
6.09	6.09	36.7	Q6IB80|Q6IB80_HUMAN	NDUFB3 protein - Homo sapiens	1.0791	0.5201	0.7725	0.0472	0.7041	0.1968
2.5	2.54	36.5	Q561V6|Q561V6_HUMAN	NDUFB5 protein - Homo sapiens	0.9346	0.688	0.9605	0.8142	0.7975	0.0752
2.73	2.79	25.5	Q6ICN9|Q6ICN9_HUMAN	NDUFB7 protein (Fragment) - Homo sapiens	0.8593	0.314	0.6669	0.0327	0.6225	0.0019
3.83	3.83	27.7	Q6FIH8|Q6FIH8_HUMAN	NDUFC2 protein - Homo sapiens	0.9904	0.9505	1.0545	0.7086	0.8169	0.2068
2.29	2.29	13.2	Q6IBA0|Q6IBA0_HUMAN	NDUFS5 protein - Homo sapiens	0.861	0.1684	0.6838	0.0191	0.706	0.0092
2.96	3.01	23.4	Q6IBC4|Q6IBC4_HUMAN	NDUFS6 protein - Homo sapiens	1.0884	0.4678	1.0292	0.8015	0.9916	0.931
8.67	8.75	23.9	Q6IBR3|Q6IBR3_HUMAN	NDUFV1 protein - Homo sapiens	1.0046	0.9744	0.935	0.6996	0.7888	0.3617
21.58	21.6	34.8	P03483|NRAM_I72A2	Neuraminidase - Influenza A virus (strain A/Udorn/307/1972 H3N2)	5.4701	0	11.9315	0	10.5405	0
120.29	120.31	49.5	Q09666|AHNK_HUMAN	Neuroblast differentiation-associated protein AHNAK - Homo sapiens	1.6965	0	1.1793	0	1.8225	0
2.09	2.31	13.9	Q9BYT8|NEUL_HUMAN	Neurolysin, mitochondrial precursor - Homo sapiens	0.8018	0.0428	0.6024	0.0512	0.3677	0.0111
20.56	20.76	24.7	Q8IY17|PLPL6_HUMAN	Neuropathy target esterase - Homo sapiens	1.1098	0.1925	1.1018	0.3281	1.1569	0.1058
2.41	2.44	6.9	Q5T7F3|Q5T7F3_HUMAN	Neuropilin 1 - Homo sapiens	1.0741	0.5432	0.7952	0.0182	0.8976	0.2289
4.52	4.52	11	Q9Y639|NPTN_HUMAN	Neuroplastin precursor - Homo sapiens	1.0871	0.3604	0.8804	0.0846	0.933	0.3335
42.73	42.73	35.1	Q14697|GANAB_HUMAN	Neutral alpha-glucosidase AB precursor - Homo sapiens	1.1344	0.0026	1.1472	0.0048	1.1297	0.0062
7.57	7.58	12.2	Q71UA6|Q71UA6_HUMAN	Neutral amino acid transporter - Homo sapiens	1.2619	0.1839	1.2235	0.1091	1.3273	0.0362
5.53	5.73	23.6	P19878|NCF2_HUMAN	Neutrophil cytosol factor 2 - Homo sapiens	1.0311	0.9151	4.0797	0.0107	8.7973	0.0018
3.77	3.78	28.1	Q6FHM6|Q6FHM6_HUMAN	NHP2L1 protein - Homo sapiens
12.19	12.2	30.9	Q969V3|NCLN_HUMAN	Nicalin precursor - Homo sapiens	1.0147	0.8934	1.0413	0.688	1.0083	0.9325
12.25	12.36	18.9	Q92542|NICA_HUMAN	Nicastrin precursor - Homo sapiens	0.7096	0.0157	0.7864	0.0652	0.8577	0.0717
55.53	55.57	44.8	Q2TB59|Q2TB59_HUMAN	Nicotinamide nucleotide transhydrogenase - Homo sapiens	0.9863	0.7109	0.9147	0.0302	0.8324	0.0001
12.22	12.31	12.4	Q59GR1|Q59GR1_HUMAN	Niemann-Pick disease, type C1 variant (Fragment) - Homo sapiens	0.9928	0.9054	1.0058	0.9522	0.889	0.0963
2.12	2.13	6.3	Q86UT6|NLRX1_HUMAN	NLR family member X1 - Homo sapiens	0.8252	0.1836	0.637	0.1512	0.4404	0.1334
16.47	16.55	22.9	P69849|NOMO3_HUMAN	Nodal modulator 3 precursor - Homo sapiens	1.0172	0.7314	0.9738	0.6143	0.8767	0.0609
136.25	136.25	54	Q60FE2|Q60FE2_HUMAN	Non-muscle myosin heavy polypeptide 9 - Homo sapiens	0.9955	0.8832	1.1473	0	1.7519	0
22.98	23.03	61.6	P03495|NS1_I72A2	Non-structural protein 1 - Influenza A virus (strain A/Udorn/307/1972 H3N2)	1.957	0.0028	7.3605	0	9.4266	0
4.81	4.81	41	Q9C002|NMES1_HUMAN	Normal mucosa of esophagus-specific gene 1 protein - Homo sapiens	0.97	0.7697	1.0575	0.6493	0.7111	0.3568
5.28	5.42	25.2	Q5JTA8|Q5JTA8_HUMAN	Novel protein - Homo sapiens	1.0507	0.5412	1.0223	0.8179	1.0118	0.8791
2.17	2.18	47.1	Q5VTU8|Q5VTU8_HUMAN	Novel protein similar to ATP synthase - Homo sapiens	0.8683	0.0916	0.9922	0.9354	0.9074	0.2871
8.25	8.28	30.7	Q546Z2|Q546Z2_HUMAN	NS5ATP1 - Homo sapiens	0.9728	0.7329	0.9194	0.5451	0.6655	0.0068
1.72	1.72	31.4	P69258|NEP_I72A2	Nuclear export protein - Influenza A virus (strain A/Udorn/307/1972 H3N2)	1.653	0.2866	3.7326	0.1875	3.8911	0.0613
2.4	2.87	12.4	Q8TEM1|PO210_HUMAN	Nuclear pore membrane glycoprotein 210 precursor - Homo sapiens	1.1063	0.5775	1.0188	0.9414	1.0951	0.461
19.26	19.42	38	Q53GX6|Q53GX6_HUMAN	Nucleobindin 1 variant (Fragment) - Homo sapiens	1.0509	0.3326	0.5723	0	0.63	0
5.25	5.34	27.6	P80303|NUCB2_HUMAN	Nucleobindin-2 precursor - Homo sapiens	1.281	0.0185	0.8923	0.4348	1.0377	0.7319
2.06	2.08	7.6	Q9Y2X3|NOL5_HUMAN	Nucleolar protein 5 - Homo sapiens
22.11	22.2	34.2	P19338|NUCL_HUMAN	Nucleolin - Homo sapiens	0.9772	0.7208	1.0288	0.6106	0.8792	0.0197
7.5	7.54	28.2	P06748|NPM_HUMAN	Nucleophosmin - Homo sapiens	1.0295	0.6997	1.1626	0.0445	1.915	0
38.51	38.53	61.2	P06827|NCAP_I72A2	Nucleoprotein - Influenza A virus (strain A/Udorn/307/1972 H3N2)	1.7244	0	6.7359	0	12.2461	0
4.65	4.67	29.1	Q32Q12|Q32Q12_HUMAN	Nucleoside diphosphate kinase - Homo sapiens	0.7225	0.1407	1.3646	0.5016	1.8438	0.1648
4	4.14	30.1	Q9NUF9|Q9NUF9_HUMAN	Nucleoside diphosphate kinase (Fragment) - Homo sapiens	1.1864	0.2793	1.132	0.0449	1.7734	0.1186
2.07	2.08	11.9	Q9H173|SIL1_HUMAN	Nucleotide exchange factor SIL1 precursor - Homo sapiens	0.9695		0.6962		0.4984
11.56	13.45	33.7	Q6IAV9|Q6IAV9_HUMAN	OAT protein - Homo sapiens	0.7951	0.0034	0.798	0.0048	0.6385	0
16.51	16.53	47.3	Q9NX40|OCAD1_HUMAN	OCIA domain-containing protein 1 - Homo sapiens	0.7187	0.0016	0.8033	0.0596	0.8814	0.1932
3.5	3.51	34.6	Q9H6K4|OPA3_HUMAN	Optic atrophy 3 protein - Homo sapiens	0.9865	0.9122	1.0128	0.8531	0.9156	0.5797
2.86	2.88	18.3	Q53FV1|ORML2_HUMAN	ORM1-like protein 2 - Homo sapiens	1.2467	0.6405	1.4053	0.5651	1.0931	0.8469
2.32	2.37	10.2	Q86WC4|OSTM1_HUMAN	Osteopetrosis-associated transmembrane protein 1 precursor - Homo sapiens	1.1681	0.5247	1.3518	0.1986	0.9036	0.5211
1.82	1.94	26.9	Q9BUP3|HTAI2_HUMAN	Oxidoreductase HTATIP2 - Homo sapiens	1.1558	0.0958	1.2501	0.1503	1.1651	0.392
4.89	5	18.6	Q9BZF1|OSBL8_HUMAN	Oxysterol-binding protein-related protein 8 - Homo sapiens	1.0896	0.251	1.4445	0.0013	1.817	0.0005
52.95	53.12	58.3	A7BI36|A7BI36_HUMAN	p180/ribosome receptor - Homo sapiens	0.6027	0	0.9578	0.3002	1.2987	0.0055
2.33	2.33	8.5	Q99571|P2RX4_HUMAN	P2X purinoceptor 4 - Homo sapiens	1.0098	0.944	1.0414	0.7062	1.0327	0.8654
2.43	2.85	12.1	Q9UQ90|SPG7_HUMAN	Paraplegin - Homo sapiens	0.8293	0.3987	1.0853		0.8981	0.6734
1.95	1.97	11.1	Q540U8|Q540U8_HUMAN	PC cell-derived growth factor - Homo sapiens	1.0402	0.942	0.9	0.8835	0.7553	0.6524
37.34	37.34	47.5	Q6IB91|Q6IB91_HUMAN	PCK2 protein - Homo sapiens	0.9597	0.3942	0.8557	0.0001	0.6311	0
4.27	4.39	29.7	Q6NUS1|Q6NUS1_HUMAN	PDCD6IP protein - Homo sapiens	0.9936	0.9389	1.3893	0.1033	2.2873	0.0036
3.51	3.58	19.2	Q7L124|Q7L124_HUMAN	PECI protein - Homo sapiens	1.5399	0.0882	1.2893	0.0271	1.3433	0.1217
1.71	1.71	9.2	Q9UBV8|PEF1_HUMAN	Peflin - Homo sapiens
3.38	3.45	16.8	Q96EY7|PTCD3_HUMAN	Pentatricopeptide repeat-containing protein 3, mitochondrial precursor - Homo sapiens	0.8501	0.2221	0.9388	0.477	0.8218	0.3453
10.14	10.16	25	Q5SXM9|Q5SXM9_HUMAN	Peptidase (Mitochondrial processing) alpha - Homo sapiens	0.8771	0.1239	0.8575	0.0501	0.6721	0.0031
2.09	2.11	12.5	Q8N697|Q8N697_HUMAN	Peptide/histidine transporter - Homo sapiens	0.9229	0.8124	0.9723	0.3101	1.2539	0.2763
21.55	21.59	55.6	Q6IBH5|Q6IBH5_HUMAN	Peptidyl-prolyl cis-trans isomerase - Homo sapiens	0.9613	0.2529	1.0503	0.153	0.9264	0.0379
3.55	4.3	37.8	Q71V99|Q71V99_HUMAN	Peptidyl-prolyl cis-trans isomerase - Homo sapiens	0.9496	0.893	1.1388	0.2406	1.2424	0.083
2.74	2.77	17.6	Q53XJ5|Q53XJ5_HUMAN	Peptidyl-prolyl cis-trans isomerase - Homo sapiens	0.9733	0.899	0.9338	0.7057	0.8983	0.6281
11.96	12.21	55.1	P30405|PPIF_HUMAN	Peptidyl-prolyl cis-trans isomerase, mitochondrial precursor - Homo sapiens	0.8241	0.0014	0.8098	0.0003	0.4822	0
3.55	3.55	42	Q13850|Q13850_HUMAN	Peripheral benzodiazepine receptor - Homo sapiens	0.8204	0.0013	0.959	0.4408	0.8292	0.0003
14.53	14.54	54.3	Q06830|PRDX1_HUMAN	Peroxiredoxin-1 - Homo sapiens	1.3296	0.0199	2.2415	0	3.9113	0
3.65	8.64	27.7	Q13162|PRDX4_HUMAN	Peroxiredoxin-4 - Homo sapiens	1.0673	0.5623	1.2293	0.0201	1.2633	0.0288
8.47	8.67	34.1	P30044|PRDX5_HUMAN	Peroxiredoxin-5, mitochondrial precursor - Homo sapiens	0.8233	0.3438	0.9169	0.4543	0.6984	0.4014
10.86	10.87	26.9	Q53EK4|Q53EK4_HUMAN	Peroxisomal long-chain acyl-coA thioesterase variant (Fragment) - Homo sapiens	0.8828	0.0817	0.7501	0.0011	0.4527	0
4.56	4.58	21.2	O96011|PX11B_HUMAN	Peroxisomal membrane protein 11B - Homo sapiens	1.0549	0.3777	0.9623	0.9167	0.8068	0.2969
6.63	6.69	17.8	O75381|PEX14_HUMAN	Peroxisomal membrane protein PEX14 - Homo sapiens	0.8049	0.2409	0.8589	0.3196	0.7054	0.0598
2.01	2.05	16.1	Q9Y5Y5|PEX16_HUMAN	Peroxisomal membrane protein PEX16 - Homo sapiens	0.7365		0.8407		0.6265
41.14	41.15	46.1	P51659|DHB4_HUMAN	Peroxisomal multifunctional enzyme type 2 - Homo sapiens	0.9744	0.5484	0.8755	0.0543	0.7329	0
2.2	2.24	10.2	Q53GP4|Q53GP4_HUMAN	PET112-like variant (Fragment) - Homo sapiens	1.2232	0.158	0.8964	0.2157	0.9923
4.49	4.87	22.6	Q6IB11|Q6IB11_HUMAN	PGRMC1 protein - Homo sapiens	0.8466	0.1106	1	1	1.0194	0.8435
24.23	26.06	65.8	Q6FHP5|Q6FHP5_HUMAN	PHB protein (Fragment) - Homo sapiens	0.9606	0.467	0.9158	0.0469	0.8447	0.0085
2	2.03	10.6	O95363|SYFM_HUMAN	Phenylalanyl-tRNA synthetase, mitochondrial precursor - Homo sapiens
4.23	4.24	12.6	O95674|CDS2_HUMAN	Phosphatidate cytidylyltransferase 2 - Homo sapiens	1.1383	0.1755	1.1344		1.0974	0.8088
17.03	17.03	21.6	Q9NTJ5|SAC1_HUMAN	Phosphatidylinositide phosphatase SAC1 - Homo sapiens	1.144	0.0588	1.271	0.0155	1.3662	0.0006
21.66	21.72	57.6	Q9BTU6|P4K2A_HUMAN	Phosphatidylinositol 4-kinase type 2-alpha - Homo sapiens	0.9666	0.5793	0.8779	0.008	0.7865	0
2.02	2.08	14.3	P48426|PI42A_HUMAN	Phosphatidylinositol-5-phosphate 4-kinase type-2 alpha - Homo sapiens	3.9229				5.2367
2	2.01	9.2	Q9BVG9|PTSS2_HUMAN	Phosphatidylserine synthase 2 - Homo sapiens
1.55	1.88	21.8	O14943|O14943_HUMAN	Phosphofructokinase-P (Fragment) - Homo sapiens	2.1388		1.9756	0.5993	2.6592	0.4934
2.7	2.76	27.6	P00558|PGK1_HUMAN	Phosphoglycerate kinase 1 - Homo sapiens	1.2746	0.0623	1.6884	0.0068	2.1342	0.0005
10.03	10.03	31.5	Q96HS1|PGAM5_HUMAN	Phosphoglycerate mutase family member 5 precursor - Homo sapiens	1.0903	0.382	0.9924	0.9535	0.8497	0.2339
1.34	1.62	9.8	Q5VTT1|Q5VTT1_HUMAN	Phospholipase A2, group VII - Homo sapiens
9.94	9.97	23.1	Q8IV08|PLD3_HUMAN	Phospholipase D3 - Homo sapiens	0.9958	0.9416	0.7637	0	0.5807	0
1.83	2.43	10.5	Q59HH3|Q59HH3_HUMAN	Phosphoribosylglycinamide formyltransferase, phosphoribosylglycinamide synthetase, phosphoribosylaminoimidazole synthetase isoform 1 variant (Fragment) - Homo sapiens	0.9141	0.5056	1.3018	0.5146	2.4889	0.0762
7.15	7.2	16	Q4LE54|Q4LE54_HUMAN	PICALM variant protein (Fragment) - Homo sapiens	0.9242	0.3184	0.5009	0.0008	0.5417	0.0011
10.67	10.72	19.1	Q9NS13|Q9NS13_HUMAN	Placenta apolipoprotein B48 receptor type 2 - Homo sapiens	0.7406	0.0175	0.8606	0.2249	1.2744	0.429
2.88	3.07	16.1	Q9Y646|PGCP_HUMAN	Plasma glutamate carboxypeptidase precursor - Homo sapiens	1.3576		1.7456		1.5994
12.34	12.4	19.2	P20020|AT2B1_HUMAN	Plasma membrane calcium-transporting ATPase 1 - Homo sapiens	1.1046	0.1025	1.086	0.1259	1.2308	0.0289
4.89	5	11.8	P16284|PECA1_HUMAN	Platelet endothelial cell adhesion molecule precursor - Homo sapiens	1.0127		0.759		0.6109
2.4	2.47	16.7	P16671|CD36_HUMAN	Platelet glycoprotein 4 - Homo sapiens	1.2584	0.0027	0.7462	0.0034	0.8263	0.0147
1.57	1.57	7.4	Q9H7M9|GI24_HUMAN	Platelet receptor Gi24 precursor - Homo sapiens	1.1577	0.6951	1.0478	0.865	1.297	0.5525
4.11	4.16	24.1	Q8TD55|PKHO2_HUMAN	Pleckstrin homology domain-containing family O member 2 - Homo sapiens	1.3557	0.0977	2.5474	0.0084	4.241	0.0016
53.97	54.39	30.3	Q15149|PLEC1_HUMAN	Plectin-1 - Homo sapiens	0.8873	0.0515	1.3358	0.0006	2.2604	0
5.88	5.97	24.3	Q6FGQ1|Q6FGQ1_HUMAN	PLEK protein (Fragment) - Homo sapiens	1.5497	0.0167	2.7152	0.0002	5.416	0
2.18	2.19	12.9	Q6UX71|PXDC2_HUMAN	Plexin domain-containing protein 2 precursor - Homo sapiens	1.1291	0.4455	0.8998	0.8822	1.1914	0.8622
8.18	8.29	13.1	O15031|PLXB2_HUMAN	Plexin-B2 precursor - Homo sapiens	1.1531	0.0532	0.782	0.0053	0.8753	0.0415
9.6	9.62	23	Q6IPF4|Q6IPF4_HUMAN	Poly(RC) binding protein 2 - Homo sapiens	1.6822		6.8481	0.0485	12.7526	0.039
5.21	5.26	15.9	P11940|PABP1_HUMAN	Polyadenylate-binding protein 1 - Homo sapiens	1.0964	0.5724	3.0808	0.0002	6.3459	0.0001
5.73	6.09	16.8	Q1K9E2|PA_I72A2	Polymerase acidic protein - Influenza A virus (strain A/Udorn/307/1972 H3N2)	2.4268	0.0315	5.2385	0.0009	8.3371	0.0003
4.22	4.37	17.3	Q8QPG7|PB2_I00A0	Polymerase basic protein 2 - Influenza A virus (strain A/Duck/Hong Kong/2986.1/2000 H5N1 genotype C)	1.612	0.6352	2.3392	0.5768	2.3793	0.6032
2	2.18	11.3	Q10472|GALT1_HUMAN	Polypeptide N-acetylgalactosaminyltransferase 1 - Homo sapiens
3.74	3.74	25.3	Q8IXK2|GLT12_HUMAN	Polypeptide N-acetylgalactosaminyltransferase 12 - Homo sapiens	1.1615	0.3344	0.7171	0.2945	0.9024	0.7962
7.9	7.95	23.8	Q10471|GALT2_HUMAN	Polypeptide N-acetylgalactosaminyltransferase 2 - Homo sapiens	1.3291	0.0053	0.6187	0.0001	0.7749	0.0022
2.05	2.06	11.7	Q9BUQ0|Q9BUQ0_HUMAN	Polypyrimidine tract binding protein 1 - Homo sapiens	0.8085	0.2131	1.4383	0.0775	3.3263	0.0016
8.41	9.1	25.2	Q8TCS8|PNPT1_HUMAN	Polyribonucleotide nucleotidyltransferase 1, mitochondrial precursor - Homo sapiens	1.2945	0.0597	1.2973	0.0443	1.0988	0.5049
9.66	9.7	33.3	Q6FGQ4|Q6FGQ4_HUMAN	PPT1 protein (Fragment) - Homo sapiens	1.0986	0.5858	1.1138	0.1365	0.8499	0.009
1.34	1.38	9.6	Q8N2U9|PQLC1_HUMAN	PQ-loop repeat-containing protein 1 - Homo sapiens					1.0803
5.45	5.45	23.9	O75915|PRAF3_HUMAN	PRA1 family protein 3 - Homo sapiens	0.6859	0.0006	1.0948	0.5375	1.3715	0.2734
3.05	3.06	22.2	Q9UI14|PRAF1_HUMAN	Prenylated Rab acceptor protein 1 - Homo sapiens	1.2708	0.41	0.647	0.2849	0.6957	0.2191
13.2	13.32	20.4	Q5JRX3|PREP_HUMAN	Presequence protease, mitochondrial precursor - Homo sapiens	0.9182	0.1916	0.8474	0.0159	0.66	0.0001
10.58	10.61	21.9	Q5JTZ9|SYAM_HUMAN	Probable alanyl-tRNA synthetase, mitochondrial precursor - Homo sapiens	0.9882	0.9348	1.1186	0.4566	1.189	0.5264
1.31	1.36	8.7	Q9NUL7|DDX28_HUMAN	Probable ATP-dependent RNA helicase DDX28 - Homo sapiens
8.95	8.96	26.5	P17844|DDX5_HUMAN	Probable ATP-dependent RNA helicase DDX5 - Homo sapiens	0.9714	0.8185	1.2735	0.0628	1.748	0.0001
25.78	25.81	26.7	Q9HD20|AT131_HUMAN	Probable cation-transporting ATPase 13A1 - Homo sapiens	0.9398	0.346	1.088	0.4002	0.9996	0.9961
3.86	4.01	18.1	Q9HA77|SYCM_HUMAN	Probable cysteinyl-tRNA synthetase, mitochondrial precursor - Homo sapiens	0.9075	0.3656	0.8392	0.2079	0.8279	0.3333
4.4	4.41	12.2	Q86WU2|LDHD_HUMAN	Probable D-lactate dehydrogenase, mitochondrial precursor - Homo sapiens	0.858	0.2142	0.7484	0.0273	0.697	0.0191
9.25	9.5	21.7	P49590|SYHM_HUMAN	Probable histidyl-tRNA synthetase, mitochondrial precursor - Homo sapiens	0.9413	0.4867	0.965	0.7598	0.7592	0.0867
2.33	2.81	14	Q8N490|PNKD_HUMAN	Probable hydrolase PNKD - Homo sapiens	0.9002	0.1683	0.9082	0.6953	0.8012	0.2437
10.96	11.04	21.4	Q8NBX0|SCPDH_HUMAN	Probable saccharopine dehydrogenase - Homo sapiens	0.8819	0.3581	0.91	0.444	0.9697	0.8322
10.09	10.14	25.8	Q9H3G5|CPVL_HUMAN	Probable serine carboxypeptidase CPVL precursor - Homo sapiens	1.3307	0.0023	1.596	0.0001	1.3157	0.013
3.56	3.58	13.6	Q02809|PLOD1_HUMAN	Procollagen-lysine,2-oxoglutarate 5-dioxygenase 1 precursor - Homo sapiens	1.5265		0.9344		1.2617
12.07	12.1	25.6	O60568|PLOD3_HUMAN	Procollagen-lysine,2-oxoglutarate 5-dioxygenase 3 precursor - Homo sapiens	1.08	0.2413	1.1066	0.1661	1.1409	0.1449
6.89	6.96	25.5	Q5VSQ6|Q5VSQ6_HUMAN	Procollagen-proline, 2-oxoglutarate 4-dioxygenase (Proline 4-hydroxylase), alpha polypeptide I - Homo sapiens	0.8069	0.269	0.8794	0.2256	0.9296	0.6785
2	2.04	15	Q53Y44|Q53Y44_HUMAN	Profilin 1 - Homo sapiens
30.14	31.37	38.9	Q6UYC3|Q6UYC3_HUMAN	Progerin - Homo sapiens	0.5776	0	0.3082	0	0.4045	0
32.22	32.23	68.9	Q99623|PHB2_HUMAN	Prohibitin-2 - Homo sapiens	0.9953	0.9216	0.9505	0.2019	0.8572	0.0014
1.52	1.54	8.7	O94903|PROSC_HUMAN	Proline synthetase co-transcribed bacterial homolog protein - Homo sapiens
1.9	2.16	20	O43586|PPIP1_HUMAN	Proline-serine-threonine phosphatase-interacting protein 1 - Homo sapiens	0.7639	0.1353	0.8216	0.4912	1.0691	0.7414
77.68	77.7	18.5	Q07954|LRP1_HUMAN	Prolow-density lipoprotein receptor-related protein 1 precursor - Homo sapiens	1.0851	0.0484	0.7124	0	0.7397	0
3	3.12	17.4	Q8WXQ7|Q8WXQ7_HUMAN	Propionyl-CoA carboxylase alpha subunit - Homo sapiens	1.0003	0.9995	1.2416	0.7117	1.2085	0.7733
2.22	2.23	16	P05166|PCCB_HUMAN	Propionyl-CoA carboxylase beta chain, mitochondrial precursor - Homo sapiens	0.7329	0.2285	0.5944	0.1121	0.5159	0.0167
22.84	23.01	40.6	Q59EN5|Q59EN5_HUMAN	Prosaposin variant (Fragment) - Homo sapiens	0.9619	0.5352	0.8771	0.531	0.7164	0.0173
12.91	12.92	32.9	Q9H7Z7|PGES2_HUMAN	Prostaglandin E synthase 2 - Homo sapiens	0.9236	0.3672	0.794	0.0076	0.6904	0.0009
11.03	11.06	23	P23219|PGH1_HUMAN	Prostaglandin G/H synthase 1 precursor - Homo sapiens	0.9266	0.3856	1.0817	0.3158	1.0205	0.7424
2.01	5.74	54.8	Q86W19|Q86W19_HUMAN	Protease serine 1 (Fragment) - Homo sapiens
2.22	3.93	25.3	Q7Z5F3|Q7Z5F3_HUMAN	Protease serine 2 isoform B - Homo sapiens	0.685	0	1.0343	0.5636	1.0983	0.1829
5.17	5.41	13.7	Q59EG8|Q59EG8_HUMAN	Proteasome 26S non-ATPase subunit 2 variant (Fragment) - Homo sapiens	1.0481	0.4743	2.6265	0.0138	8.7972	0.0002
6.74	6.74	30.7	P55145|ARMET_HUMAN	Protein ARMET precursor - Homo sapiens	1.0294	0.6953	1.1221	0.3386	0.9908	0.9344
6.77	6.77	25.3	Q9Y2B0|CNPY2_HUMAN	Protein canopy homolog 2 precursor - Homo sapiens	0.9251	0.6013	0.9541	0.764	0.9332	0.5058
3.51	3.58	24.8	Q9BT09|CNPY3_HUMAN	Protein canopy homolog 3 precursor - Homo sapiens	0.9655	0.6627	1.1116	0.4822	1.2779	0.511
49.76	49.78	62	P30101|PDIA3_HUMAN	Protein disulfide-isomerase A3 precursor - Homo sapiens	0.9378	0.0207	0.9702	0.3942	0.9523	0.1152
2.86	2.86	13.5	Q14554|PDIA5_HUMAN	Protein disulfide-isomerase A5 precursor - Homo sapiens	0.9123	0.4368	1.1636	0.4792	0.7648	0.3853
48.1	48.16	66.3	P07237|PDIA1_HUMAN	Protein disulfide-isomerase precursor - Homo sapiens	0.921	0.0008	0.9974	0.9383	0.9035	0.0004
9.96	10.08	27.3	Q96JJ7|TXD10_HUMAN	Protein disulfide-isomerase TXNDC10 precursor - Homo sapiens	0.8677	0.131	1.2245	0.125	1.1756	0.2802
5.56	5.56	40.2	Q99497|PARK7_HUMAN	Protein DJ-1 - Homo sapiens	0.9889	0.8639	1.0155	0.8355	0.7411	0.0192
2.03	2.03	7.7	Q86VR2|F134C_HUMAN	Protein FAM134C - Homo sapiens
8.12	8.15	31.7	Q92520|FAM3C_HUMAN	Protein FAM3C precursor - Homo sapiens	1.0187	0.7087	0.6514	0	0.7662	0.0015
3.29	3.37	18.5	Q9NUQ9|FA49B_HUMAN	Protein FAM49B - Homo sapiens	1.3944	0.0268	1.0895	0.5436	1.1562	0.3297
1.71	1.81	11.7	Q96LZ7|FA82A_HUMAN	Protein FAM82A - Homo sapiens	1.078		1.0584		1.0982
2.34	2.55	18.5	Q96DB5|FA82B_HUMAN	Protein FAM82B - Homo sapiens	0.7323	0.1674	0.4387	0.0094	0.4191	0.077
3.76	3.84	14	Q96TC7|FA82C_HUMAN	Protein FAM82C - Homo sapiens	0.8396	0.2062	0.8749	0.5261	1.4963	0.5495
2.56	2.59	12	Q9NPR9|GP108_HUMAN	Protein GPR108 precursor - Homo sapiens	1.2848	0.4468	0.8563	0.588	0.9814	0.9671
2.83	2.95	19.7	Q8N5M9|JAGN1_HUMAN	Protein jagunal homolog 1 - Homo sapiens
2.25	2.32	11.9	P05771|KPCB_HUMAN	Protein kinase C beta type - Homo sapiens
2.65	2.81	17.6	Q86XJ6|Q86XJ6_HUMAN	Protein kinase C, delta - Homo sapiens	0.9525	0.6302	1.6137	0.0171	3.1802	0.0004
8.82	8.98	17.5	Q86UE4|LYRIC_HUMAN	Protein LYRIC - Homo sapiens	0.8243	0.3196	0.9094	0.4392	1.2436	0.1527
2.84	4.37	25.7	Q9BPW8|NIPS1_HUMAN	Protein NipSnap homolog 1 - Homo sapiens	1.0027	0.9773	1.1439	0.0808	1.0628	0.6322
2.64	2.79	20.2	Q9UFN0|NPS3A_HUMAN	Protein NipSnap homolog 3A - Homo sapiens
5.9	5.99	41.5	Q5XKP0|QIL1_HUMAN	Protein QIL1 - Homo sapiens	0.9093	0.2113	0.9432	0.3498	0.8333	0.0633
2.02	2.02	9.8	Q9P258|RCC2_HUMAN	Protein RCC2 - Homo sapiens
3.24	3.26	10.9	Q96AA3|RFT1_HUMAN	Protein RFT1 homolog - Homo sapiens	0.8697	0.7321	0.9738	0.9221	1.3246	0.2703
6.09	6.15	42.3	P60903|S10AA_HUMAN	Protein S100-A10 - Homo sapiens	1.3191	0.0001	1.516	0	2.5506	0
6.22	6.29	50.5	P31949|S10AB_HUMAN	Protein S100-A11 - Homo sapiens	2.0948	0	2.1017	0	3.3348	0
7.34	7.34	42.6	P26447|S10A4_HUMAN	Protein S100-A4 - Homo sapiens	1.948	0.0134	5.2507	0	13.1474	0
3.33	3.41	30	P06703|S10A6_HUMAN	Protein S100-A6 - Homo sapiens	1.2287	0.1372	1.8356	0.0101	3.0011	0.0003
5.97	6.01	46.2	P05109|S10A8_HUMAN	Protein S100-A8 - Homo sapiens	1.3126	0.2041	5.3916	0.0001	9.3503	0
3.95	3.96	36	P06702|S10A9_HUMAN	Protein S100-A9 - Homo sapiens
5.85	5.94	9.7	Q9UBV2|SE1L1_HUMAN	Protein sel-1 homolog 1 precursor - Homo sapiens	0.7968	0.1102	1.0322	0.5969	0.9694	0.7348
2.18	2.18	8	Q9H2V7|SPNS1_HUMAN	Protein spinster homolog 1 - Homo sapiens	1.1039	0.2646	1.0736	0.3235	0.8262	0.1351
7.77	8.15	17.7	Q969Z0|TBRG4_HUMAN	Protein TBRG4 - Homo sapiens	0.8707	0.2415	0.9289	0.3436	0.8172	0.1365
9.63	9.67	27.3	P61619|S61A1_HUMAN	Protein transport protein Sec61 subunit alpha isoform 1 - Homo sapiens	0.9796	0.6828	1.0364	0.6395	0.9715	0.6917
4.18	4.18	52.1	P60468|SC61B_HUMAN	Protein transport protein Sec61 subunit beta - Homo sapiens	1.0735	0.7903	1.1723	0.5499	1.2386	0.588
1.36	1.38	5.7	Q9C0H2|TTYH3_HUMAN	Protein tweety homolog 3 - Homo sapiens	0.72		0.5275		0.4969
2.2	2.22	13	Q9P035|PTAD1_HUMAN	Protein tyrosine phosphatase-like protein PTPLAD1 - Homo sapiens	1.0318		0.7992		0.7857
5.04	5.04	17.4	O75695|XRP2_HUMAN	Protein XRP2 - Homo sapiens	1.3748	0.0093	1.1243	0.2782	1.2811	0.0698
2.72	2.72	20.9	Q9GZM5|YIPF3_HUMAN	Protein YIPF3 - Homo sapiens	0.8094	0.1741	0.6445	0.2839	0.7095	0.4366
4.18	4.19	20.5	Q9BSR8|YIPF4_HUMAN	Protein YIPF4 - Homo sapiens	1.1738	0.3293	0.6916	0.0052	0.7738	0.0308
3.53	3.53	13.9	Q8WUK0|PTPM1_HUMAN	Protein-tyrosine phosphatase mitochondrial 1, mitochondrial precursor - Homo sapiens	0.8603	0.7844	0.6226	0.0373	0.6112	0.3418
1.49	1.5	13.8	O60704|TPST2_HUMAN	Protein-tyrosine sulfotransferase 2 - Homo sapiens	1.0957	0.571	0.7532	0.2629	1.0164	0.8044
2	2	12.5	Q04941|PLP2_HUMAN	Proteolipid protein 2 - Homo sapiens	1.4322		0.9427		1.8293
2	2.01	17.6	Q15254|Q15254_HUMAN	Prothymosin alpha precursor - Homo sapiens
7	10.14	25	P09769|FGR_HUMAN	Proto-oncogene tyrosine-protein kinase FGR - Homo sapiens	1.0721	0.6086	1.0502	0.7308	1.4567	0.0423
7.41	7.43	29.6	A1A508|A1A508_HUMAN	PRSS3 protein - Homo sapiens	0.4919	0.1006	0.7998	0.0286	1.0185	0.9335
2.03	2.04	13.5	Q6IBN0|Q6IBN0_HUMAN	PSMD3 protein - Homo sapiens	1.2491		1.6031		3.0528
1.48	1.51	39.8	Q9H0N5|PHS2_HUMAN	Pterin-4-alpha-carbinolamine dehydratase 2 - Homo sapiens	1.1438	0.0641	1.0388	0.5012	0.9862	0.8698
2.79	2.82	13.4	O43865|SAHH2_HUMAN	Putative adenosylhomocysteinase 2 - Homo sapiens	1.3612	0.4446	1.8551	0.1773	4.0482	0.0519
5.98	5.98	17.3	Q16740|CLPP_HUMAN	Putative ATP-dependent Clp protease proteolytic subunit, mitochondrial precursor - Homo sapiens	1.1306	0.4729	1.1227	0.6005	0.757	0.2687
2.12	2.16	13.2	O43824|GTPB6_HUMAN	Putative GTP-binding protein 6 - Homo sapiens	0.7206		0.4972		0.598
4.77	4.91	13.9	Q6P4A8|PLBL1_HUMAN	Putative phospholipase B-like 1 precursor - Homo sapiens	1.1936	0.0041	1.5602	0.0065	1.5168	0.0011
10.21	10.29	23.1	Q8NHP8|PLBL2_HUMAN	Putative phospholipase B-like 2 precursor - Homo sapiens	1.0504	0.6391	1.4106	0.0058	1.1763	0.1444
1.43	1.43	19.3	Q53YB2|Q53YB2_HUMAN	Putative receptor protein - Homo sapiens	0.872	0.2349	0.9227	0.4611	0.9345	0.8191
3.86	3.87	37.2	Q86Z22|Q86Z22_HUMAN	Putative uncharacterized protein - Homo sapiens	1.5335	0.0533	1.5282	0.0356	1.6717	0.0182
6.03	6.07	21.7	Q99785|Q99785_HUMAN	Putative uncharacterized protein (Fragment) - Homo sapiens
3.12	3.22	17.1	Q9BU08|Q9BU08_HUMAN	Putative uncharacterized protein (Fragment) - Homo sapiens	1.126	0.1513	1.5897	0.0927	3.9747	0.0578
2.77	2.8	22	Q53R19|Q53R19_HUMAN	Putative uncharacterized protein ARPC2 - Homo sapiens	1.3696	0.1192	1.2432	0.3881	1.9239	0.0554
2.67	2.69	17.8	Q53SA7|Q53SA7_HUMAN	Putative uncharacterized protein CAPG - Homo sapiens	1.3178	0.1597	2.193	0.0573	3.5797	0.026
4.22	7.82	39.2	Q5JQ44|Q5JQ44_HUMAN	Putative uncharacterized protein DKFZp547A0616 (Fragment) - Homo sapiens	1.1432	0.1668	0.9118	0.2949	0.9694	0.7423
13.48	13.56	21.2	Q63HL4|Q63HL4_HUMAN	Putative uncharacterized protein DKFZp686G04235 - Homo sapiens	0.9703	0.6854	1.2656	0.0085	1.6501	0
6.49	6.49	15.6	Q68CT7|Q68CT7_HUMAN	Putative uncharacterized protein DKFZp686G12159 - Homo sapiens	0.9854	0.8859	0.9895	0.909	0.8933	0.2656
3.34	3.34	15.1	Q5HYM5|Q5HYM5_HUMAN	Putative uncharacterized protein DKFZp686H10220 - Homo sapiens	0.8364	0.6208	0.6627	0.1876	0.8591	0.6302
2.52	2.82	13	Q7Z3U5|Q7Z3U5_HUMAN	Putative uncharacterized protein DKFZp686L0869 - Homo sapiens	1.5218	0.2119	1.2771	0.3373	3.604	0.0021
3.96	10.73	23.2	Q68E10|Q68E10_HUMAN	Putative uncharacterized protein DKFZp686M1669 - Homo sapiens	1.0344	0.8928	1.5724	0.1384	3.3307	0.051
7.71	7.77	23.9	Q7Z349|Q7Z349_HUMAN	Putative uncharacterized protein DKFZp686M22160 (Fragment) - Homo sapiens	0.7897	0.124	0.9991	0.9957	1.3111	0.5359
2.96	2.96	14.9	Q68D50|Q68D50_HUMAN	Putative uncharacterized protein DKFZp779I1858 - Homo sapiens	0.9119	0.2785	0.7813	0.0518	0.68	0.0005
1.83	2.78	17.8	Q68DQ4|Q68DQ4_HUMAN	Putative uncharacterized protein DKFZp779L0468 - Homo sapiens	0.9284		0.8329		1.627
3.54	3.55	17.2	Q68DD1|Q68DD1_HUMAN	Putative uncharacterized protein DKFZp781B1032 - Homo sapiens	1.0615	0.7118	0.9348	0.1817	1.0038	0.9719
47.81	47.91	53.8	Q549T6|Q549T6_HUMAN	Putative uncharacterized protein ERP70 - Homo sapiens	0.9389	0.1076	1.0381	0.379	0.9121	0.0409
1.84	1.84	17.8	Q53SC2|Q53SC2_HUMAN	Putative uncharacterized protein IL1RN - Homo sapiens	1.8358		2.2796		3.0854
5.94	6.04	17	Q53RX7|Q53RX7_HUMAN	Putative uncharacterized protein ITGA6 - Homo sapiens	1.0003	0.9972	0.5378	0	0.6277	0
3.53	3.53	31.4	Q96BN9|Q96BN9_HUMAN	Putative uncharacterized protein LOC552891 - Homo sapiens
8.79	8.82	18.4	Q4ZFY5|Q4ZFY5_HUMAN	Putative uncharacterized protein MRPS5 - Homo sapiens	0.897	0.3291	1.058	0.4909	0.9469	0.7777
24.05	24.06	50.5	Q53RC7|Q53RC7_HUMAN	Putative uncharacterized protein P5 - Homo sapiens	0.9927	0.8824	0.9519	0.3519	0.962	0.3747
5.01	9.56	25	Q53SS8|Q53SS8_HUMAN	Putative uncharacterized protein PCBP1 - Homo sapiens	0.8181	0.3294	2.8144	0.0945	4.9699	0.0564
2.14	2.2	20.3	Q75L23|Q75L23_HUMAN	Putative uncharacterized protein PSMC2 (Fragment) - Homo sapiens	2.1476		5.7117	0.0149	16.5371	0.0151
2.55	2.57	27.8	Q75MH1|Q75MH1_HUMAN	Putative uncharacterized protein RPS26 - Homo sapiens	0.7143	0.3682	1.4476	0.2777	3.4327	0.013
3.96	3.97	28.9	Q57Z92|Q57Z92_HUMAN	Putative uncharacterized protein RPS7 - Homo sapiens	1.0484	0.7945	1.7337	0.0432	3.7725	0.0166
35.24	35.3	35.4	P11498|PYC_HUMAN	Pyruvate carboxylase, mitochondrial precursor - Homo sapiens	0.9318	0.1143	0.8757	0.0059	0.798	0.0049
14.99	15.01	44.6	Q5JPT8|Q5JPT8_HUMAN	Pyruvate dehydrogenase (Lipoamide) alpha 1 - Homo sapiens	0.8928	0.0379	0.8939	0.0195	0.7646	0.0001
12.1	12.13	37.3	P11177|ODPB_HUMAN	Pyruvate dehydrogenase E1 component subunit beta, mitochondrial precursor - Homo sapiens	0.9353	0.4769	0.9433	0.527	0.735	0.0233
11.34	12.21	27.5	O00330|ODPX_HUMAN	Pyruvate dehydrogenase protein X component, mitochondrial precursor - Homo sapiens	0.8523	0.015	0.9505	0.3423	0.7769	0.0166
22.05	22.11	44.3	P14618|KPYM_HUMAN	Pyruvate kinase isozymes M1/M2 - Homo sapiens	1.2108	0.0513	1.5811	0.0002	2.8504	0
2.42	2.5	8.3	Q6WKZ4|RFIP1_HUMAN	Rab11 family-interacting protein 1 - Homo sapiens	0.8044	0.1603	1.0428	0.7494	0.9883	0.9544
16.5	16.52	57.3	Q6FI42|Q6FI42_HUMAN	RAB11B protein - Homo sapiens	0.9525	0.5377	0.9475	0.5384	0.9627	0.6174
2.72	5.9	32.4	Q504R6|Q504R6_HUMAN	RAB13 protein (Fragment) - Homo sapiens	1.0148	0.8456	1.0185	0.9025	1.2889	0.0216
5.68	22.22	72.2	Q5U0I6|Q5U0I6_HUMAN	RAB1A, member RAS oncogene family - Homo sapiens	0.9327	0.3981	0.8456	0.1099	0.973	0.8046
1.71	5.65	46	Q6FI44|Q6FI44_HUMAN	RAB5A protein - Homo sapiens
14.04	14.04	53.7	Q6FH55|Q6FH55_HUMAN	RAB5C protein - Homo sapiens	0.986	0.9399	1.1869	0.1107	1.333	0.0607
7.8	9.84	52.4	Q53ET8|Q53ET8_HUMAN	RAB6A, member RAS oncogene family isoform a variant (Fragment) - Homo sapiens	1.1382	0.0247	0.8111	0.0011	0.8426	0.0102
4.24	12.95	54.6	Q6FHV5|Q6FHV5_HUMAN	RAB8A protein - Homo sapiens	1.1033	0.5991	0.872	0.2523	1.4687	0.1658
5.53	5.56	23.5	Q8WXG1|RSAD2_HUMAN	Radical S-adenosyl methionine domain-containing protein 2 - Homo sapiens	4.7062	0.0063	7.6258	0.0007	8.4104	0.0006
3.05	13.49	51.6	Q5U0C3|Q5U0C3_HUMAN	RAP1A, member of RAS oncogene family - Homo sapiens
34.1	34.46	28.5	P46940|IQGA1_HUMAN	Ras GTPase-activating-like protein IQGAP1 - Homo sapiens	1.2449	0.0404	0.9628	0.6691	1.6738	0
5.28	10.2	16.1	Q13576|IQGA2_HUMAN	Ras GTPase-activating-like protein IQGAP2 - Homo sapiens	1.3092	0.3533	2.3307	0.0061	4.7737	0
8.07	9.17	26.4	Q53HM4|Q53HM4_HUMAN	Ras homolog gene family, member A variant (Fragment) - Homo sapiens	1.0408	0.7281	1.2229	0.0219	1.6938	0
10.98	10.99	44.8	P15153|RAC2_HUMAN	Ras-related C3 botulinum toxin substrate 2 precursor - Homo sapiens	0.9535	0.527	1.2273	0.0268	1.7813	0
1.54	1.66	13.8	Q9HB90|RRAGC_HUMAN	Ras-related GTP-binding protein C - Homo sapiens	3.5536		6.3624		6.8539
5.72	11.67	57	P61026|RAB10_HUMAN	Ras-related protein Rab-10 - Homo sapiens	1.0768	0.3976	1.0985	0.2421	1.0011	0.9889
10.69	12.69	49.8	P61106|RAB14_HUMAN	Ras-related protein Rab-14 - Homo sapiens	1.0641	0.535	1.1585	0.224	1.4573	0.0045
7.22	7.27	36.4	Q9NP72|RAB18_HUMAN	Ras-related protein Rab-18 - Homo sapiens	0.9615	0.6752	0.9335	0.1002	1.1474	0.3207
24.57	24.58	74.1	Q9H0U4|RAB1B_HUMAN	Ras-related protein Rab-1B - Homo sapiens	1.03	0.848	1.0653	0.6837	1.4589	0.047
2.18	4.21	29.8	Q9UL25|RAB21_HUMAN	Ras-related protein Rab-21 - Homo sapiens	1.1301	0.4725	1.2042	0.3944	0.9546	0.7966
1.62	3.64	29	P51159|RB27A_HUMAN	Ras-related protein Rab-27A - Homo sapiens	1.0402	0.7597	1.1678	0.2088	1.4056	0.0937
7.04	7.65	45.3	P61019|RAB2A_HUMAN	Ras-related protein Rab-2A - Homo sapiens	1.0917	0.1715	0.8373	0.1329	0.7857	0.225
5.9	5.92	44.3	Q13636|RAB31_HUMAN	Ras-related protein Rab-31 - Homo sapiens	0.8938	0.3366	0.8277	0.0222	1.0883	0.3393
7.46	7.52	35.1	Q13637|RAB32_HUMAN	Ras-related protein Rab-32 - Homo sapiens	0.978	0.8595	1.0013	0.9928	0.8552	0.0533
5.3	10.76	32.8	Q15286|RAB35_HUMAN	Ras-related protein Rab-35 - Homo sapiens	1.1674	0.0904	0.9959	0.932	1.3806	0.0876
2.23	5.93	38.8	O95716|RAB3D_HUMAN	Ras-related protein Rab-3D - Homo sapiens	1.1645	0.4476	1.2304	0.6132	1.9729	0.1188
2.02	4.04	19.2	P61018|RAB4B_HUMAN	Ras-related protein Rab-4B - Homo sapiens	1.2784	0.0785	1.3733	0.2529	1.2168	0.0221
4.14	9.59	51.6	P61020|RAB5B_HUMAN	Ras-related protein Rab-5B - Homo sapiens	0.8388	0.3686	1.544	0.3136	2.8373	0.0029
21.31	22.16	70	P51149|RAB7A_HUMAN	Ras-related protein Rab-7a - Homo sapiens	0.9946	0.912	0.9654	0.5384	0.932	0.2667
7.21	12.89	58.9	Q92930|RAB8B_HUMAN	Ras-related protein Rab-8B - Homo sapiens	1.1396	0.1238	1.0993	0.2541	1.039	0.7001
4	5.12	25.2	P11233|RALA_HUMAN	Ras-related protein Ral-A precursor - Homo sapiens	1.0619	0.573	0.9629	0.8141	0.9792	0.8057
13.16	14.27	55.4	P61224|RAP1B_HUMAN	Ras-related protein Rap-1b precursor - Homo sapiens	1.1988	0.6134	1.2528	0.4643	1.5628	0.3177
8.06	8.1	34.9	Q00765|REEP5_HUMAN	Receptor expression-enhancing protein 5 - Homo sapiens	0.6347	0.0023	0.903	0.0939	1.0112	0.9215
4.34	4.37	14.6	O75787|RENR_HUMAN	Renin receptor precursor - Homo sapiens	0.8329	0.0536	0.8033	0.3399	0.8137	0.132
4.18	4.18	20.1	Q9P0H9|Q9P0H9_HUMAN	RER1 protein - Homo sapiens	1.4515	0.1405	1.053	0.6327	1.1051	0.4545
4.44	4.5	16.9	Q15293|RCN1_HUMAN	Reticulocalbin-1 precursor - Homo sapiens	0.9187	0.6223	0.9486	0.634	0.879	0.2188
11.52	11.56	25.1	Q16799|RTN1_HUMAN	Reticulon-1 - Homo sapiens	0.9975	0.9961	1.3004	0.0849	1.71	0.0231
4.01	5.43	8.6	O95197|RTN3_HUMAN	Reticulon-3 - Homo sapiens	0.6953		0.8557		1.0382
18.45	18.54	15.9	Q9NQC3|RTN4_HUMAN	Reticulon-4 - Homo sapiens	0.8783	0.3163	1.3541	0.0001	1.9239	0.0006
12.4	12.44	28.1	Q9HB40|RISC_HUMAN	Retinoid-inducible serine carboxypeptidase precursor - Homo sapiens	0.964	0.6415	1.4189	0.001	1.279	0.0011
10.08	10.13	25.2	Q8TC12|RDH11_HUMAN	Retinol dehydrogenase 11 - Homo sapiens	0.732	0.0076	0.9492	0.5894	1.1562	0.0931
3.04	3.06	26	Q8NBN7|RDH13_HUMAN	Retinol dehydrogenase 13 - Homo sapiens	0.695	0.0912	0.8025	0.3944	0.5464	0.0297
3.02	3.1	36	Q9HBH5|RDH14_HUMAN	Retinol dehydrogenase 14 - Homo sapiens	0.9084		0.7791		0.7998
3.19	3.24	12.1	Q8N5I0|Q8N5I0_HUMAN	RFTN1 protein (Fragment) - Homo sapiens
2.01	2.01	11.1	Q6I9S5|Q6I9S5_HUMAN	RGS19 protein - Homo sapiens
2.54	2.6	18.9	P52566|GDIR2_HUMAN	Rho GDP-dissociation inhibitor 2 - Homo sapiens	1.3815	0.158	3.6073	0.1774	6.7779	0.0921
3.34	3.39	13.4	Q07960|RHG01_HUMAN	Rho GTPase-activating protein 1 - Homo sapiens	2.6526				4.6558
4.18	4.18	13.2	Q6NTF9|RHBD2_HUMAN	Rhomboid domain-containing protein 2 - Homo sapiens	1.2791	0.0518	0.9108	0.3952	1.1148	0.4151
2.44	2.44	18.9	A6XND5|A6XND5_HUMAN	Ribonuclease T2 - Homo sapiens	1.3425	0.0161	1.8579	0.1025	1.4327	0.1666
46.1	46.1	59.5	Q53EP4|Q53EP4_HUMAN	Ribophorin I variant (Fragment) - Homo sapiens	0.9842	0.6746	1.0034	0.9307	0.9807	0.563
8.82	8.87	71.1	Q59FI9|Q59FI9_HUMAN	Ribosomal protein L12 variant (Fragment) - Homo sapiens	0.8023	0.0602	1.1261	0.2213	1.4533	0.0003
2.92	2.93	43.4	Q642I1|Q642I1_HUMAN	Ribosomal protein L15 - Homo sapiens	0.9472	0.7081	1.2154	0.0537	1.4548	0.0291
5.44	5.45	26.4	Q6NZ52|Q6NZ52_HUMAN	Ribosomal protein L27a - Homo sapiens	0.9654	0.7917	1.1161	0.2365	1.745	0.0932
3.77	3.78	23.6	Q6IPI1|Q6IPI1_HUMAN	Ribosomal protein L29 - Homo sapiens	0.7235	0.0758	1.2192	0.0718	2.4769	0.0096
9.54	9.55	29	Q96QL0|Q96QL0_HUMAN	Ribosomal protein L3 - Homo sapiens	0.7893	0.0123	1.2895	0.0075	1.9009	0.0002
9.91	10.13	29.3	Q59GY2|Q59GY2_HUMAN	Ribosomal protein L4 variant (Fragment) - Homo sapiens	0.8087	0.0058	1.2292	0.0264	1.8502	0
5.75	5.76	22.8	Q59GX9|Q59GX9_HUMAN	Ribosomal protein L5 variant (Fragment) - Homo sapiens	0.9329	0.3578	1.1418	0.1118	1.153	0.2988
9.5	9.62	35.3	Q5T8U4|Q5T8U4_HUMAN	Ribosomal protein L7a - Homo sapiens	0.7757	0.0044	1.0119	0.9119	1.6062	0.0553
4.28	4.28	40.1	Q5SUJ3|Q5SUJ3_HUMAN	Ribosomal protein S18 - Homo sapiens	1.1723	0.3614	1.649	0.0375	4.0354	0.0007
10.05	10.06	57.3	Q8WVX7|Q8WVX7_HUMAN	Ribosomal protein S19 (Fragment) - Homo sapiens	1.0442	0.763	1.2467	0.0588	3.4044	0
2	3.62	41.7	Q5T4L6|Q5T4L6_HUMAN	Ribosomal protein S27 - Homo sapiens	1.5369		1.8014		4.4882
6.48	6.71	31.4	Q6NXR8|Q6NXR8_HUMAN	Ribosomal protein S3A - Homo sapiens	0.9425	0.5927	1.7782	0.0002	3.8833	0
4.19	4.77	27.3	Q96DV6|Q96DV6_HUMAN	Ribosomal protein S6 - Homo sapiens	1.2766	0.2459	2.3322	0.0472	7.6968	0.0353
4.1	4.16	16.1	Q15418|KS6A1_HUMAN	Ribosomal protein S6 kinase alpha-1 - Homo sapiens	1.1576	0.0928	2.3983	0.3019	5.4641	0.1349
4.15	4.16	35.1	Q5JR95|Q5JR95_HUMAN	Ribosomal protein S8 - Homo sapiens	0.87	0.2573	1.3506	0.2212	2.0561	0.0753
7.34	7.46	26.3	Q96E11|RRFM_HUMAN	Ribosome recycling factor, mitochondrial precursor - Homo sapiens	0.9134	0.2837	0.8459	0.0957	0.6434	0.003
2	2	7.8	Q96K19|RN170_HUMAN	RING finger protein 170 - Homo sapiens
7.13	7.19	24.9	Q7L0Y3|RG9D1_HUMAN	RNA (guanine-9-)-methyltransferase domain-containing protein 1, mitochondrial precursor - Homo sapiens	0.8798	0.0821	0.8642	0.192	0.6925	0.0285
4.01	4.01	17.1	Q9HC36|RMTL1_HUMAN	RNA methyltransferase-like protein 1 - Homo sapiens	1.1593	0.3207	0.6761	0.134	0.6497	0.4818
2.49	3.19	26.1	Q9UKM9|RALY_HUMAN	RNA-binding protein Raly - Homo sapiens
1.39	1.62	16	Q0A461|RDRP_I68A3	RNA-directed RNA polymerase catalytic subunit - Influenza A virus (strain A/Turkey/Ontario/6118/1968 H8N4)	1.3394		1.9941		3.6408
6.83	6.83	26.9	Q6FHT8|Q6FHT8_HUMAN	RNP24 protein - Homo sapiens	1.227	0.017	1.0112	0.8759	1.07	0.4245
8.34	8.34	49.3	Q9BSQ6|Q9BSQ6_HUMAN	RPL13A protein (Fragment) - Homo sapiens	0.8619	0.55	1.276	0.3375	1.979	0
9.8	9.86	59.1	Q6IPH7|Q6IPH7_HUMAN	RPL14 protein - Homo sapiens	1.0264	0.7734	1.3025	0.1438	1.419	0.0842
4.2	4.32	37.5	Q6IAX2|Q6IAX2_HUMAN	RPL21 protein - Homo sapiens	0.8135	0.0844	1.2903	0.004	2.0635	0.0013
14.04	14.04	76.5	Q6FG96|Q6FG96_HUMAN	RPLP2 protein - Homo sapiens	0.8964	0.1617	0.9425	0.6486	0.8129	0.3312
6.79	6.81	48.1	Q96IR1|Q96IR1_HUMAN	RPS4X protein (Fragment) - Homo sapiens	0.9716	0.8596	1.5583	0.0107	3.062	0
16.5	16.51	31.3	Q9Y3Z3|SAMH1_HUMAN	SAM domain and HD domain-containing protein 1 - Homo sapiens	1.1044	0.348	2.1313	0	3.6216	0
41.4	41.45	37	P16615|AT2A2_HUMAN	Sarcoplasmic/endoplasmic reticulum calcium ATPase 2 - Homo sapiens	0.9391	0.2574	1.1051	0.0856	1.0928	0.1047
14.57	14.58	23.5	Q9UL12|SARDH_HUMAN	Sarcosine dehydrogenase, mitochondrial precursor - Homo sapiens	0.8954	0.143	0.8776	0.0313	0.7257	0.0002
3.21	3.24	16.6	Q6FG23|Q6FG23_HUMAN	SCAMP1 protein (Fragment) - Homo sapiens	1.2703	0.6934	1.2109	0.7993	1.2366	0.7422
8.4	8.4	11.9	Q6IBK3|Q6IBK3_HUMAN	SCAMP2 protein - Homo sapiens	1.0633	0.4475	1.0363	0.7233	1.0394	0.7179
11.78	12.02	22.6	Q53Y63|Q53Y63_HUMAN	Scavenger receptor class B, member 2 - Homo sapiens	0.9459	0.3009	1.0398	0.4757	0.886	0.043
3.11	3.13	9	Q86VB7|C163A_HUMAN	Scavenger receptor cysteine-rich type 1 protein M130 precursor - Homo sapiens	1.1673	0.1491	0.8971	0.5773	0.7907	0.2755
4.02	4.04	19.3	O75880|SCO1_HUMAN	SCO1 protein homolog, mitochondrial precursor - Homo sapiens	0.8783	0.3149	0.8622	0.1319	0.7534	0.0065
6.66	6.71	30.8	O43819|SCO2_HUMAN	SCO2 protein homolog, mitochondrial precursor - Homo sapiens	1.1647	0.1246	0.7957	0.1448	0.8401	0.3922
2	2.01	5.7	Q969E2|SCAM4_HUMAN	Secretory carrier-associated membrane protein 4 - Homo sapiens	1.239	0.5207	0.8129	0.3115	0.9931	0.9067
1.54	1.76	2.8	Q13018|PLA2R_HUMAN	Secretory phospholipase A2 receptor precursor - Homo sapiens
2.81	2.86	14.4	Q9NZV5|SELN_HUMAN	Selenoprotein N precursor - Homo sapiens	1.2107		0.8131		0.7548
2.22	2.32	27.6	P35270|SPRE_HUMAN	Sepiapterin reductase - Homo sapiens	1.0355		0.9316		0.8111
14.02	14.04	31.4	P83111|LACTB_HUMAN	Serine beta-lactamase-like protein LACTB, mitochondrial precursor - Homo sapiens	0.8661	0.0042	0.9482	0.2221	0.819	0.0003
31.64	31.78	47.4	Q8N1A5|Q8N1A5_HUMAN	Serine hydroxymethyltransferase - Homo sapiens	0.956	0.3321	0.9137	0.0661	0.7312	0
2	2	8.6	Q9NRX5|SERC1_HUMAN	Serine incorporator 1 - Homo sapiens
7.57	7.59	20.5	O15269|SPTC1_HUMAN	Serine palmitoyltransferase 1 - Homo sapiens	1.0893	0.057	0.9873	0.7541	0.9376	0.774
2.81	2.99	15.9	Q6NSK0|Q6NSK0_HUMAN	Serine/threonine kinase 10 - Homo sapiens	1.4914	0.2701	1.8068	0.2941	2.629	0.0764
5.96	6.01	20.1	P50454|SERPH_HUMAN	Serpin H1 precursor - Homo sapiens	0.9759	0.8684	1.0144	0.913	1	1
29.21	29.24	37.6	P02768|ALBU_HUMAN	Serum albumin precursor - Homo sapiens	1.153	0.0026	0.8654	0.0264	1.6415	0
2.3	2.58	13.5	Q9NP81|SYSM_HUMAN	Seryl-tRNA synthetase, mitochondrial precursor - Homo sapiens	0.9815	0.9146	1.0226	0.8593	0.8411	0.3475
9.67	9.73	30.6	P16219|ACADS_HUMAN	Short-chain specific acyl-CoA dehydrogenase, mitochondrial precursor - Homo sapiens	0.791	0.0272	0.7478	0.0327	0.8028	0.2127
4.01	4.01	12	Q9Y286|SIGL7_HUMAN	Sialic acid-binding Ig-like lectin 7 precursor - Homo sapiens
3.02	3.02	8.2	Q9Y336|SIGL9_HUMAN	Sialic acid-binding Ig-like lectin 9 precursor - Homo sapiens
1.72	1.72	5.5	Q99519|NEUR1_HUMAN	Sialidase-1 precursor - Homo sapiens
11.28	15.29	32	Q9H9B4|SFXN1_HUMAN	Sideroflexin-1 - Homo sapiens	0.8524	0.1747	0.811	0.1719	0.7976	0.0875
19.69	19.7	52.3	Q9BWM7|SFXN3_HUMAN	Sideroflexin-3 - Homo sapiens	0.9486	0.3438	0.8656	0.0168	0.758	0.0039
1.7	1.7	13.2	Q8TD22|SFXN5_HUMAN	Sideroflexin-5 - Homo sapiens	1.0679	0.8221	0.9557	0.899	0.8426	0.4943
1.63	1.64	6.3	Q99720|OPRS1_HUMAN	Sigma 1-type opioid receptor - Homo sapiens	0.4481	0.003	1.1035	0.5769	1.1484	0.4236
2	2	15.7	Q9Y6A9|SPCS1_HUMAN	Signal peptidase complex subunit 1 - Homo sapiens
7.95	8.03	42	Q15005|SPCS2_HUMAN	Signal peptidase complex subunit 2 - Homo sapiens	1.0005	0.9951	1.1797	0.0285	1.1161	0.1502
2.02	2.02	11.7	P61009|SPCS3_HUMAN	Signal peptidase complex subunit 3 - Homo sapiens	0.9423	0.4717	0.7984	0.0711	0.7828	0.0223
2.14	2.15	47.1	P37108|SRP14_HUMAN	Signal recognition particle 14 kDa protein - Homo sapiens	0.9118		1.0985		1.3183
7.49	7.81	32.1	Q9Y5M8|SRPRB_HUMAN	Signal recognition particle receptor subunit beta - Homo sapiens	1.1071	0.51	1.2941	0.0617	1.3954	0.0582
11.83	11.88	25	A2A2E1|A2A2E1_HUMAN	Signal-regulatory protein alpha - Homo sapiens	1.2032	0.5692	0.7402	0.0766	0.6579	0.1531
29.61	29.62	48.8	Q8TA92|Q8TA92_HUMAN	Similar to AFG3 ATPase family gene 3-like 2 (Fragment) - Homo sapiens	0.829	0.0021	0.9533	0.2563	0.9028	0.0682
7.82	7.83	37.3	Q9BTQ7|Q9BTQ7_HUMAN	Similar to ribosomal protein L23 (Fragment) - Homo sapiens	1.0148	0.8753	2.6193	0.0106	4.9672	0.0053
1.5	1.55	12.9	A4D2F6|A4D2F6_HUMAN	Similar to Splicing factor, arginine/serine-rich, 46kD - Homo sapiens	0.8428	0.4588	1.0653	0.7842	1.3444	0.3511
12.12	12.15	61.5	Q567R6|Q567R6_HUMAN	Single-stranded DNA binding protein 1 - Homo sapiens	0.7399	0.0032	0.7198	0.0205	0.6323	0
2	2.01	10	Q5T295|Q5T295_HUMAN	Sirtuin (Silent mating type information regulation 2 homolog) 5 - Homo sapiens
2.04	2.06	9	Q9UIB8|SLAF5_HUMAN	SLAM family member 5 precursor - Homo sapiens	1.1507	0.5423	0.5821	0.0945	0.5901	0.1281
22.78	22.81	54.5	Q6IBH0|Q6IBH0_HUMAN	SLC25A11 protein - Homo sapiens	1.0133	0.8988	0.9753	0.7584	0.9015	0.3342
2.57	2.7	11.8	Q8NCG7|DGLB_HUMAN	Sn1-specific diacylglycerol lipase beta - Homo sapiens	0.8371	0.6027	0.8483	0.2205	0.7936
60.23	60.24	42.7	P05023|AT1A1_HUMAN	Sodium/potassium-transporting ATPase subunit alpha-1 precursor - Homo sapiens	1.4214	0	1.1008	0.0382	1.3002	0
12.42	12.45	36.2	P54709|AT1B3_HUMAN	Sodium/potassium-transporting ATPase subunit beta-3 - Homo sapiens	1.4404	0.0014	1.1185	0.1727	1.2698	0.0014
11.18	11.18	13.9	Q53F03|Q53F03_HUMAN	Solute carrier family 1, member 4 variant (Fragment) - Homo sapiens	1.3181	0.0118	1.0003	0.9973	1.2493	0.0696
5.69	5.86	13.3	A0AV76|A0AV76_HUMAN	Solute carrier family 12 (Potassium/chloride transporters), member 6 - Homo sapiens	0.9643	0.7556	0.9286	0.6331	0.9402	0.7644
2.98	3.16	13.1	Q9Y666|S12A7_HUMAN	Solute carrier family 12 member 7 - Homo sapiens	1.5207		2.117		4.5658
2	2.06	9.2	Q5T8R6|Q5T8R6_HUMAN	Solute carrier family 16, member 1 - Homo sapiens	2.4822		2.1529		2.2273
2.08	2.12	12.3	P11169|GTR3_HUMAN	Solute carrier family 2, facilitated glucose transporter member 3 - Homo sapiens	1.1384	0.663	1.279	0.4331	1.2194	0.3502
4.08	4.1	10	Q96BI1|S22AI_HUMAN	Solute carrier family 22 member 18 - Homo sapiens	0.8297	0.494	1.1237	0.5014	1.1794	0.4256
6.64	14.69	26.4	Q96AM8|Q96AM8_HUMAN	Solute carrier family 25 (Mitochondrial carrier, Aralar), member 12 - Homo sapiens	0.8882	0.1592	1.074	0.5001	0.8888	0.3284
2	2.19	14	Q3KQZ1|S2535_HUMAN	Solute carrier family 25 member 35 - Homo sapiens	0.8575	0.1319	0.7583	0.3343	0.622	0.1657
2.1	2.19	18.3	Q8TBP6|S2540_HUMAN	Solute carrier family 25 member 40 - Homo sapiens	1.1347	0.3016	1.188	0.2678	0.8257	0.2866
2.16	2.23	9.2	Q8NBI5|S43A3_HUMAN	Solute carrier family 43 member 3 - Homo sapiens	1.399	0.2961	1.098	0.3622	1.5798	0.0601
2.09	2.1	10.5	Q8IV97|Q8IV97_HUMAN	Solute carrier family 7 (Cationic amino acid transporter, y+ system), member 5 - Homo sapiens	1.5191	0.0635	1.1157	0.1122	1.0659	0.1942
10.07	10.15	21.5	Q99523|SORT_HUMAN	Sortilin precursor - Homo sapiens	1.0453	0.7443	0.6704	0.0016	0.7004	0.0117
9.02	9.06	20.5	Q9Y512|SAM50_HUMAN	Sorting and assembly machinery component 50 homolog - Homo sapiens	1.3382	0.0004	1.1103	0.1762	0.9251	0.1877
1.36	1.61	16.3	Q9UNH7|SNX6_HUMAN	Sorting nexin-6 - Homo sapiens
5.19	5.19	29.1	Q6IAM7|Q6IAM7_HUMAN	SPC18 protein - Homo sapiens	0.9404	0.394	0.8334	0.0731	0.9018	0.3532
4.55	4.63	19.5	O95470|SGPL1_HUMAN	Sphingosine-1-phosphate lyase 1 - Homo sapiens	0.9531	0.8516	0.8487	0.4784	1.0459	0.8506
2.07	2.12	12.2	Q9BX95|SGPP1_HUMAN	Sphingosine-1-phosphate phosphatase 1 - Homo sapiens
3.29	3.36	13.5	Q5T6N7|Q5T6N7_HUMAN	Spleen tyrosine kinase - Homo sapiens	1.2737	0.0109	2.0302	0.0369	3.3996	0.0655
4.39	4.44	30	Q5SZ71|Q5SZ71_HUMAN	Splicing factor proline/glutamine-rich - Homo sapiens	0.5413		0.7303		2.1848	0.173
1.42	1.42	27.4	P84103|SFRS3_HUMAN	Splicing factor, arginine/serine-rich 3 - Homo sapiens	0.7762	0.1212	1.2238	0.1443	2.1924	0.0411
4.34	4.35	32.8	Q08170|SFRS4_HUMAN	Splicing factor, arginine/serine-rich 4 - Homo sapiens	0.8148	0.3607	1.2433	0.29	2.2727	0.018
4.02	4.03	32.4	Q8WW59|SPRY4_HUMAN	SPRY domain-containing protein 4 - Homo sapiens	1.148	0.4895	1.2814	0.7746	1.2101	0.8292
11.93	11.93	76.1	Q9GZT3|SLIRP_HUMAN	SRA stem-loop-interacting RNA-binding protein, mitochondrial precursor - Homo sapiens	0.8558	0.0356	0.7395	0.0002	0.5783	0
13.59	13.68	28.2	Q6IAX9|Q6IAX9_HUMAN	SRPR protein - Homo sapiens	0.9242	0.5159	1.4184	0.0026	1.837	0
13.04	13.07	24	Q7KZF4|SND1_HUMAN	Staphylococcal nuclease domain-containing protein 1 - Homo sapiens	0.9373	0.3006	1.021	0.7897	2.0173	0
2.06	2.1	9.7	Q14849|STAR3_HUMAN	StAR-related lipid transfer protein 3 - Homo sapiens	1.0482		1.2333		0.9546
21.22	21.23	27.2	Q5VVZ1|Q5VVZ1_HUMAN	Sterol carrier protein 2 - Homo sapiens	1.0328	0.4999	0.8918	0.1875	0.799	0.0267
9.2	9.23	21.5	P35610|SOAT1_HUMAN	Sterol O-acyltransferase 1 - Homo sapiens	0.8761	0.2092	0.9295	0.2883	0.9977	0.9867
13.42	13.53	36.7	Q15738|NSDHL_HUMAN	Sterol-4-alpha-carboxylate 3-dehydrogenase, decarboxylating - Homo sapiens	0.9857	0.9099	1.0824	0.5392	1.2081	0.2099
1.7	1.7	6.3	P08842|STS_HUMAN	Steryl-sulfatase precursor - Homo sapiens
12.29	12.32	35.7	Q9UJZ1|STML2_HUMAN	Stomatin-like protein 2 - Homo sapiens	0.8392	0.1257	0.8751	0.2472	0.752	0.0039
2.07	2.1	5.3	O43815|STRN_HUMAN	Striatin - Homo sapiens	0.8953		0.5841		0.8208
2.94	2.94	21.3	Q99470|SDF2_HUMAN	Stromal cell-derived factor 2 precursor - Homo sapiens	0.9237	0.2462	1.1686	0.0459	1.0573	0.624
2.8	2.95	14.2	Q8N382|Q8N382_HUMAN	Stromal interaction molecule 1 - Homo sapiens	0.9704	0.8608	1.1445	0.3035	1.2855	0.1042
16.54	16.65	58.2	P21912|DHSB_HUMAN	Succinate dehydrogenase [ubiquinone] iron-sulfur subunit, mitochondrial precursor - Homo sapiens	1.0115	0.8059	1.026	0.6221	0.8841	0.0169
29.79	29.79	38.4	Q59GW8|Q59GW8_HUMAN	Succinate dehydrogenase complex, subunit A, flavoprotein variant (Fragment) - Homo sapiens	0.9712	0.5553	0.9618	0.4511	0.8442	0.0042
3.08	3.13	12.1	Q546H9|Q546H9_HUMAN	Succinic semialdehyde dehydrogenase precursor - Homo sapiens	0.6903	0.0226	0.8228	0.3302	0.5819	0.1517
21.27	21.29	36.3	Q9P2R7|SUCB1_HUMAN	Succinyl-CoA ligase [ADP-forming] beta-chain, mitochondrial precursor - Homo sapiens	0.8625	0.0083	0.9303	0.1356	0.807	0.0049
33.15	33.22	54.6	Q96I99|SUCB2_HUMAN	Succinyl-CoA ligase [GDP-forming] beta-chain, mitochondrial precursor - Homo sapiens	0.9219	0.0364	0.9519	0.2236	0.7012	0
8.56	9.53	21.7	P55809|SCOT_HUMAN	Succinyl-CoA:3-ketoacid-coenzyme A transferase 1, mitochondrial precursor - Homo sapiens	0.9722	0.7723	0.994	0.9635	0.8904	0.5042
11.05	11.06	31.5	Q6IAL5|Q6IAL5_HUMAN	SUCLG1 protein - Homo sapiens	1.0061	0.9681	0.8852	0.2538	0.7942	0.0116
2.51	2.51	4.8	Q8TED4|SPX2_HUMAN	Sugar phosphate exchanger 2 - Homo sapiens	0.6255	0.0087	0.6916	0.0198	0.8551	0.0662
2.01	2.01	9.4	Q8NBK3|SUMF1_HUMAN	Sulfatase-modifying factor 1 precursor - Homo sapiens
4.89	4.89	22.3	Q8NBJ7|SUMF2_HUMAN	Sulfatase-modifying factor 2 precursor - Homo sapiens	0.973	0.7675	1.0607	0.6257	1.0428	0.3824
41.84	41.84	55.8	Q9Y6N5|SQRD_HUMAN	Sulfide:quinone oxidoreductase, mitochondrial precursor - Homo sapiens	1.0728	0.0901	0.9963	0.9374	0.8838	0.0161
9.3	9.46	34.7	P04179|SODM_HUMAN	Superoxide dismutase [Mn], mitochondrial precursor - Homo sapiens	0.8967	0.0344	0.9501	0.4372	0.6272	0
2.14	2.14	18.3	Q5T8T3|Q5T8T3_HUMAN	Surfeit 1 - Homo sapiens	1.1598	0.1856	0.9527	0.5386	0.8267	0.0251
2.81	2.81	18.6	Q5T8U6|Q5T8U6_HUMAN	Surfeit 4 - Homo sapiens	0.9541	0.6922	1.59	0.0446	1.8146	0.0209
4.91	4.94	27.3	Q9NZ01|GPSN2_HUMAN	Synaptic glycoprotein SC2 - Homo sapiens	0.9563	0.7076	1.1337	0.3126	1.0582	0.6158
14.68	14.68	28.8	Q99536|VAT1_HUMAN	Synaptic vesicle membrane protein VAT-1 homolog - Homo sapiens	0.854	0.354	1.2952	0.1283	1.2319	0.195
4	4	12.9	O43759|SNG1_HUMAN	Synaptogyrin-1 - Homo sapiens	1.0429	0.573	0.8085	0.2827	0.5197	0.0039
7.27	7.27	30.4	O43760|SNG2_HUMAN	Synaptogyrin-2 - Homo sapiens	1.0916	0.2964	0.9687	0.6725	0.9192	0.5624
2.02	2.04	10.8	Q16563|SYPL1_HUMAN	Synaptophysin-like protein 1 - Homo sapiens	1.1368		1.0142		1.1045
2.82	2.83	24.6	O00161|SNP23_HUMAN	Synaptosomal-associated protein 23 - Homo sapiens	1.2643	0.0548	0.9529	0.7289	0.9766	0.9199
2	2.12	11.4	Q53YE2|Q53YE2_HUMAN	Syntaxin 3A - Homo sapiens
7.47	7.48	28.6	Q86Y82|STX12_HUMAN	Syntaxin-12 - Homo sapiens	0.8501	0.1992	0.6869	0.0039	0.649	0.0136
7.06	7.07	32.2	O15400|STX7_HUMAN	Syntaxin-7 - Homo sapiens	1.0001	0.9996	0.6728	0.0636	0.3763	0.0493
3.71	3.82	24.2	Q9UNK0|STX8_HUMAN	Syntaxin-8 - Homo sapiens	1.0293	0.8919	1.1715	0.0349	1.3425	0.41
7.81	7.84	20.1	Q15833|STXB2_HUMAN	Syntaxin-binding protein 2 - Homo sapiens	1.2432	0.0783	1.0357	0.7122	1.2222	0.1006
6.19	6.21	21.8	O00186|STXB3_HUMAN	Syntaxin-binding protein 3 - Homo sapiens	1.1527	0.1732	0.8694	0.4932	1.093	0.4772
4.84	5.6	32.9	O00560|SDCB1_HUMAN	Syntenin-1 - Homo sapiens	0.8368	0.1926	0.8139	0.0229	0.7987	0.0475
28.94	29.08	25.9	Q9Y490|TLN1_HUMAN	Talin-1 - Homo sapiens	1.3861	0.001	1.244	0.0085	2.4385	0
7.56	7.59	18.5	A2ABC0|A2ABC0_HUMAN	TAP binding protein - Homo sapiens	0.9161	0.4112	0.9719	0.6616	1.0636	0.3121
1.52	1.67	3.6	Q9BX59|TPSNR_HUMAN	Tapasin-related protein precursor - Homo sapiens
4.72	4.72	18.2	P13686|PPA5_HUMAN	Tartrate-resistant acid phosphatase type 5 precursor - Homo sapiens	1.05	0.5955	0.8227	0.1596	0.7498	0.0688
2	2.09	9.3	Q8TC07|TBC15_HUMAN	TBC1 domain family member 15 - Homo sapiens
4.89	4.89	21.9	P29016|CD1B_HUMAN	T-cell surface glycoprotein CD1b precursor - Homo sapiens
22.57	22.59	28.2	Q8WVC5|Q8WVC5_HUMAN	T-cell, immune regulator 1, ATPase, H+ transporting, lysosomal V0 subunit A3 - Homo sapiens	1.091	0.1217	1.1312	0.0522	1.1764	0.0098
5.28	5.3	14.4	P78371|TCPB_HUMAN	T-complex protein 1 subunit beta - Homo sapiens	1.168	0.6535	0.944	0.8351	1.3885	0.3683
6.6	6.6	19.2	Q9Y6I9|TX264_HUMAN	Testis-expressed sequence 264 protein precursor - Homo sapiens	0.8993	0.4617	1.0638	0.5623	1.0192	0.7308
2.07	2.08	12.1	Q15006|TTC35_HUMAN	Tetratricopeptide repeat protein 35 - Homo sapiens	0.999	0.992	1.2153	0.1853	1.1279	0.3557
2.61	2.75	19.9	Q6LES8|Q6LES8_HUMAN	TFAM protein (Fragment) - Homo sapiens	0.9049	0.3834	0.8965	0.3632	0.8423	0.0143
5.85	5.85	34.3	Q9NPJ3|THEM2_HUMAN	Thioesterase superfamily member 2 - Homo sapiens	0.821	0.2072	0.8187	0.1225	0.508	0.0034
6.82	6.83	25.7	Q9H3N1|TXND1_HUMAN	Thioredoxin domain-containing protein 1 precursor - Homo sapiens	1.1504	0.1541	1.1229	0.2042	1.2058	0.0473
4.17	4.32	30.2	O95881|TXD12_HUMAN	Thioredoxin domain-containing protein 12 precursor - Homo sapiens
6	6.03	17.5	Q9H1E5|TXD13_HUMAN	Thioredoxin domain-containing protein 13 precursor - Homo sapiens	0.8684	0.2857	1.0387	0.279	1.0841	0.5447
3.93	3.94	14.9	Q9Y320|TXD14_HUMAN	Thioredoxin domain-containing protein 14 precursor - Homo sapiens	0.9002	0.1394	1.0761	0.3638	1.104	0.3081
16.36	16.63	37.2	Q9BS26|TXND4_HUMAN	Thioredoxin domain-containing protein 4 precursor - Homo sapiens	1.1476	0.1384	1.0482	0.6269	1.0594	0.5372
12.62	12.76	30.8	Q8NBS9|TXND5_HUMAN	Thioredoxin domain-containing protein 5 precursor - Homo sapiens	0.9026	0.061	1.0246	0.7458	0.929	0.1913
7.26	7.29	24	Q9NNW7|TRXR2_HUMAN	Thioredoxin reductase 2, mitochondrial precursor - Homo sapiens	1.0361	0.8019	0.8554	0.2227	0.6291	0.0566
3.19	3.21	21.7	Q99757|THIOM_HUMAN	Thioredoxin, mitochondrial precursor - Homo sapiens	0.8648	0.0282	0.7692	0.0117	0.5769	0.0033
19.25	19.25	45.3	P30048|PRDX3_HUMAN	Thioredoxin-dependent peroxide reductase, mitochondrial precursor - Homo sapiens	0.9018	0.0427	0.8702	0.0023	0.7363	0
4.09	4.11	39.7	Q86V81|THOC4_HUMAN	THO complex subunit 4 - Homo sapiens	0.8493	0.6369	0.8758	0.7287	0.7813	0.5892
15.48	15.67	35.2	Q53F23|Q53F23_HUMAN	Thromboxane A synthase 1 (Platelet, cytochrome P450, family 5, subfamily A) isoform TXS-I variant (Fragment) - Homo sapiens	0.9033	0.0545	1.1349	0.0118	1.0458	0.2918
2.99	2.99	12.5	Q9BVV7|TI21L_HUMAN	TIM21-like protein, mitochondrial precursor - Homo sapiens	1.1103	0.4342	1.1501	0.4647	0.9455	0.7731
5.16	8.69	12.1	Q8WZ42|TITIN_HUMAN	Titin - Homo sapiens	0.8555	0.013	0.9932	0.9195	1.1909	0.037
3.02	3.05	46.2	Q0P5U7|Q0P5U7_HUMAN	TMSB4X protein (Fragment) - Homo sapiens	1.0994	0.8146	1.2315	0.7145	1.2991	0.5136
10.27	10.4	16.4	Q9NR97|TLR8_HUMAN	Toll-like receptor 8 precursor - Homo sapiens	1.0718	0.421	0.9281	0.4184	0.9774	0.4143
6.56	6.56	24.3	Q9NXH8|CI167_HUMAN	Torsin family protein C9orf167 - Homo sapiens	0.8751	0.3248	0.8368	0.2132	0.7903	0.1029
4.07	4.19	17.8	Q5JTV8|TOIP1_HUMAN	Torsin-1A-interacting protein 1 - Homo sapiens	0.9379	0.6802	1.1915	0.1541	1.3742	0.031
2.35	2.36	10.6	Q8NFQ8|TOIP2_HUMAN	Torsin-1A-interacting protein 2 - Homo sapiens	0.907	0.5189	0.9106	0.3408	0.7414	0.1658
1.73	1.75	9.2	Q6FGS1|Q6FGS1_HUMAN	TPD52L2 protein - Homo sapiens	0.6334		0.7474		0.5394
14.06	14.08	57.1	Q8TCG3|Q8TCG3_HUMAN	TPMsk3 (Fragment) - Homo sapiens	2.3251	0.0026	3.8444	0.0001	10.3631	0
2.41	2.44	18.4	Q9H4I3|TRABD_HUMAN	TraB domain-containing protein - Homo sapiens	1.0395	0.7916	0.981	0.9005	0.8969	0.4097
2.06	2.06	7.8	Q6FHL3|Q6FHL3_HUMAN	TRAM1 protein - Homo sapiens					1.1891
1.82	1.84	10.7	Q9BV79|MECR_HUMAN	Trans-2-enoyl-CoA reductase, mitochondrial precursor - Homo sapiens	0.8055	0.2488	0.932	0.6423	0.9001	0.5518
3.83	3.87	20.4	Q9Y4P3|TBL2_HUMAN	Transducin beta-like 2 protein - Homo sapiens	0.9001	0.3144	0.8802	0.4652	0.8301	0.088
45.91	46.02	47.9	Q1HE24|Q1HE24_HUMAN	Transferrin receptor - Homo sapiens	0.9444	0.603	0.4773	0.0162	0.5374	0.0079
30.68	30.7	39.5	Q53H26|Q53H26_HUMAN	Transferrin variant (Fragment) - Homo sapiens	1.1871	0.09	0.8072	0.0336	0.8665	0.1449
5.2	5.21	11.2	Q6B838|Q6B838_HUMAN	Transglutaminase 2 - Homo sapiens	2.1066	0.0275	3.7938	0.0055	9.1721	0.0002
7	7	22.1	O43493|TGON2_HUMAN	Trans-Golgi network integral membrane protein 2 precursor - Homo sapiens	1.2289	0.2933	0.848	0.2003	0.7885	0.3636
10.51	10.6	20.4	Q9Y5S1|TRPV2_HUMAN	Transient receptor potential cation channel subfamily V member 2 - Homo sapiens	1.1955	0.2056	0.8703	0.2031	0.9407	0.7319
13.44	13.67	47.3	Q53G69|Q53G69_HUMAN	Translocase of inner mitochondrial membrane 44 homolog (Fragment) - Homo sapiens	1.0254	0.6493	1.0511	0.4883	0.827	0.0739
10.37	10.4	28.9	Q0VAB1|Q0VAB1_HUMAN	Translocase of inner mitochondrial membrane 50 homolog - Homo sapiens	0.82	0.0131	0.8203	0.0003	0.704	0.0032
12.73	12.73	20.3	Q99442|SEC62_HUMAN	Translocation protein SEC62 - Homo sapiens	1.0151	0.8441	1.137	0.0501	1.1356	0.1121
10.75	10.9	21.2	Q9UGP8|SEC63_HUMAN	Translocation protein SEC63 homolog - Homo sapiens	0.908	0.3362	1.0368	0.6634	1.0513	0.3795
6.07	6.07	13.3	P43307|SSRA_HUMAN	Translocon-associated protein subunit alpha precursor - Homo sapiens	0.966	0.7676	1.0876	0.4521	1.0318	0.7747
2.08	2.08	14.5	P51571|SSRD_HUMAN	Translocon-associated protein subunit delta precursor - Homo sapiens	1.2798	0.6563	1.2904	0.3715	1.1814	0.8301
5.63	5.68	21.6	Q9UNL2|SSRG_HUMAN	Translocon-associated protein subunit gamma - Homo sapiens	0.9299	0.3143	0.9516	0.8845	0.8225	0.3646
4	4.01	9.4	O15321|TM9S1_HUMAN	Transmembrane 9 superfamily member 1 precursor - Homo sapiens
2.26	2.59	9.7	Q99805|TM9S2_HUMAN	Transmembrane 9 superfamily member 2 precursor - Homo sapiens	1.2496	0.074	0.7543	0.2373	0.8458	0.0665
10.29	10.39	20.9	Q9HD45|TM9S3_HUMAN	Transmembrane 9 superfamily member 3 precursor - Homo sapiens	1.1671	0.0521	0.6214	0	0.6876	0
8.27	8.27	15.1	Q92544|TM9S4_HUMAN	Transmembrane 9 superfamily member 4 precursor - Homo sapiens	0.9925	0.9105	0.5598	0	0.5918	0
5.85	5.86	29.8	Q9UM00|TMCO1_HUMAN	Transmembrane and coiled-coil domain-containing protein 1 - Homo sapiens	1.208	0.0142	1.1905	0.0685	1.3223	0.0285
2.45	2.47	6.2	Q6UWJ1|TMCO3_HUMAN	Transmembrane and coiled-coil domain-containing protein 3 precursor - Homo sapiens	1.089	0.7618	1.1574	0.4805	1.199	0.163
3.28	3.29	15	Q13445|TMED1_HUMAN	Transmembrane emp24 domain-containing protein 1 precursor - Homo sapiens	1.1233	0.5301	1.0605	0.6708	1.2435	0.0271
2.15	2.15	13.8	Q9Y3Q3|TMED3_HUMAN	Transmembrane emp24 domain-containing protein 3 precursor - Homo sapiens
7.73	7.74	28.6	Q7Z7H5|TMED4_HUMAN	Transmembrane emp24 domain-containing protein 4 precursor - Homo sapiens	1.2658	0.052	0.8833	0.5684	1.086	0.676
1.88	1.89	21	Q9Y3A6|TMED5_HUMAN	Transmembrane emp24 domain-containing protein 5 precursor - Homo sapiens	1.247	0.2364	1.0881	0.5055	1.1845	0.1374
4.55	4.58	20.5	Q9Y3B3|TMED7_HUMAN	Transmembrane emp24 domain-containing protein 7 precursor - Homo sapiens	1.0675	0.6699	0.7865	0.0834	0.8173	0.1579
4.36	6.37	27.6	Q9BVK6|TMED9_HUMAN	Transmembrane emp24 domain-containing protein 9 precursor - Homo sapiens	1.1334	0.1104	1.0405	0.5854	1.3635	0.0132
6.03	6.26	25.1	Q9BVC6|TM109_HUMAN	Transmembrane protein 109 precursor - Homo sapiens	0.8136	0.0857	1.039	0.5795	0.9574	0.585
2.53	2.53	21.1	Q9P0I2|TM111_HUMAN	Transmembrane protein 111 - Homo sapiens	0.77		0.7556		0.7072
1.67	1.67	22.6	Q9H061|T126A_HUMAN	Transmembrane protein 126A - Homo sapiens	1.1276	0.2808	1.1269	0.3728	0.8062	0.3444
2	2.02	12.2	Q8IUX1|T126B_HUMAN	Transmembrane protein 126B - Homo sapiens
5	5	24.5	Q9NX00|TM160_HUMAN	Transmembrane protein 160 - Homo sapiens	0.3692		0.7467		0.7022
2.64	2.67	14.8	Q9HC07|TM165_HUMAN	Transmembrane protein 165 - Homo sapiens	3.4636		0.9102		1.6584
3.22	3.24	13.2	Q4KMQ2|TM16F_HUMAN	Transmembrane protein 16F - Homo sapiens	1.0178	0.8288	0.8669	0.0226	1.0539	0.492
2.02	2.13	9.7	Q9NW15|TM16K_HUMAN	Transmembrane protein 16K - Homo sapiens	1.1892	0.007	1.0011	0.9973	1.0414	0.9496
2	2.05	13.3	Q8IY95|TM192_HUMAN	Transmembrane protein 192 - Homo sapiens
3.08	3.08	25.9	Q6UW68|TM205_HUMAN	Transmembrane protein 205 - Homo sapiens	0.984	0.9201	1.2127	0.1017	1.1929	0.1122
5.99	6.03	27.1	P57088|TMM33_HUMAN	Transmembrane protein 33 - Homo sapiens	0.9357	0.2587	1.0126	0.849	1.0217	0.7209
8.98	9.01	22.5	Q9BTV4|TMM43_HUMAN	Transmembrane protein 43 - Homo sapiens	0.8112	0.0026	1.0202	0.7849	1.0343	0.6342
3.78	3.83	12.1	O94886|TM63A_HUMAN	Transmembrane protein 63A - Homo sapiens	1.2424	0.111	0.8831	0.032	0.6706	0.313
2.05	2.05	9.2	Q9BUB7|TMM70_HUMAN	Transmembrane protein 70 - Homo sapiens
2.14	2.6	24.6	Q5J8M3|TMM85_HUMAN	Transmembrane protein 85 - Homo sapiens	1.7539	0.41	1.7124	0.4878	0.7906
4	4.01	30.9	Q9BV81|TMM93_HUMAN	Transmembrane protein 93 - Homo sapiens	1.2008	0.3627	0.9109	0.5279	0.9309	0.5689
10.22	10.28	23.1	Q96CP4|Q96CP4_HUMAN	Transporter 1, ATP-binding cassette, sub-family B - Homo sapiens	1.0624		1.7554		1.5563
18.96	21.99	37.3	Q9BV61|Q9BV61_HUMAN	TRAP1 protein (Fragment) - Homo sapiens	0.9316	0.1221	0.8911	0.0406	0.64	0
12.96	13.03	37.6	P53007|TXTP_HUMAN	Tricarboxylate transport protein, mitochondrial precursor - Homo sapiens	1.0005	0.9957	0.9154	0.1674	0.7921	0.0144
56.39	56.52	52.7	P40939|ECHA_HUMAN	Trifunctional enzyme subunit alpha, mitochondrial precursor - Homo sapiens	0.9197	0.01	0.8818	0.0007	0.7461	0
39.21	39.23	50.8	P55084|ECHB_HUMAN	Trifunctional enzyme subunit beta, mitochondrial precursor - Homo sapiens	0.9152	0.0034	0.9022	0.0028	0.7928	0
1.94	1.95	12.4	Q9NVV0|TM38B_HUMAN	Trimeric intracellular cation channel type B - Homo sapiens
4.05	4.11	27.7	Q53HE2|Q53HE2_HUMAN	Triosephosphate isomerase (Fragment) - Homo sapiens	2.0925		2.8713		3.0133
19.1	19.11	23.8	O14773|TPP1_HUMAN	Tripeptidyl-peptidase 1 precursor - Homo sapiens	1.1723	0.0084	1.2988	0.0199	1.1004	0.2646
2	2.17	15.6	Q9NYL9|TMOD3_HUMAN	Tropomodulin-3 - Homo sapiens	1.0521	0.8183	1.1574	0.5205	2.626	0.0855
2.02	7.3	41.5	Q5U0D9|Q5U0D9_HUMAN	Tropomyosin 4 - Homo sapiens	1.3874	0.536	2.0226	0.2999	3.5598	0.1448
6.91	6.91	22.9	Q6IB06|Q6IB06_HUMAN	TST protein - Homo sapiens	0.8094	0.0084	0.8611	0.006	0.7797	0.0103
22.6	22.62	41.9	Q71U36|TBA1A_HUMAN	Tubulin alpha-1A chain - Homo sapiens	1.345	0.1386	4.1522	0	8.1644	0
4.08	25.95	44.8	P04350|TBB4_HUMAN	Tubulin beta-4 chain - Homo sapiens	0.9883		1.3886	0.041	2.1687	0.0716
28.26	28.27	50.9	Q5SU16|Q5SU16_HUMAN	Tubulin, beta - Homo sapiens	1.2298		2.5592		8.0116	0.0017
5.42	5.43	18.8	P25942|TNR5_HUMAN	Tumor necrosis factor receptor superfamily member 5 precursor - Homo sapiens	1.3983	0.0441	1.1059	0.5364	1.0063	0.9632
57.35	57.49	48.4	Q5CAQ5|Q5CAQ5_HUMAN	Tumor rejection antigen (Gp96) 1 - Homo sapiens	0.9073	0.0013	1.0298	0.3947	1.0408	0.1772
4	4	36.2	Q53X69|Q53X69_HUMAN	TXN protein (Fragment) - Homo sapiens	1.5164	0.111	2.3113	0.0948	3.8538	0.0041
6.6	6.61	24.5	Q6RW13|ATRAP_HUMAN	Type-1 angiotensin II receptor-associated protein - Homo sapiens	1.0633	0.7182	0.9104	0.7514	1.2603	0.3259
2.01	7.41	16.3	P08631|HCK_HUMAN	Tyrosine-protein kinase HCK - Homo sapiens	1.1498		1.6511		2.0836
9.01	9.1	25.5	P18031|PTN1_HUMAN	Tyrosine-protein phosphatase non-receptor type 1 - Homo sapiens	0.7535	0.0994	1.2235	0.083	2.0604	0
1.7	11.59	25.2	P78324|SHPS1_HUMAN	Tyrosine-protein phosphatase non-receptor type substrate 1 precursor - Homo sapiens	1.2267	0.3546	0.6395	0.117	0.6681	0.0285
3.78	3.89	18.4	P54577|SYYC_HUMAN	Tyrosyl-tRNA synthetase, cytoplasmic - Homo sapiens	1.138	0.4763	1.8434	0.0731	6.2401	0.0087
4.61	4.72	30.4	Q9Y2Z4|SYYM_HUMAN	Tyrosyl-tRNA synthetase, mitochondrial precursor - Homo sapiens	0.9394	0.2491	0.7896	0.0087	0.6525	0.034
2.05	2.05	16.7	Q9NVA1|UQCC_HUMAN	Ubiquinol-cytochrome c reductase complex chaperone CBP3 homolog - Homo sapiens	0.8828	0.478	0.9741	0.8085	1.0959	0.7417
4.06	4.06	17	O75208|COQ9_HUMAN	Ubiquinone biosynthesis protein COQ9, mitochondrial precursor - Homo sapiens	1.0217	0.8683	1.0272	0.9159	0.9879	0.9679
12.03	12.03	59.4	Q3MIH3|Q3MIH3_HUMAN	Ubiquitin A-52 residue ribosomal protein fusion product 1 - Homo sapiens	0.9735	0.4261	1.005	0.8997	1.0461	0.2589
1.58	1.62	7.9	Q5JRR8|Q5JRR8_HUMAN	Ubiquitin-like modifier activating enzyme 1 - Homo sapiens	1.6009		1.5323		2.6355
29.87	30.74	25.4	Q9NYU2|UGGG1_HUMAN	UDP-glucose:glycoprotein glucosyltransferase 1 precursor - Homo sapiens	1.0258	0.5952	1.1371	0.0033	1.0778	0.1146
3.59	3.64	15.7	Q9H3H5|GPT_HUMAN	UDP-N-acetylglucosamine--dolichyl-phosphate N-acetylglucosaminephosphotransferase - Homo sapiens	0.9815	0.8818	1.1299	0.1773	1.0197	0.8791
4.01	4.08	12.9	Q2T9F7|Q2T9F7_HUMAN	UNC84B protein - Homo sapiens
3.73	3.78	12.5	Q86TW2|ADCK1_HUMAN	Uncharacterized aarF domain-containing protein kinase 1 precursor - Homo sapiens	1.4324	0.1211	1.5454	0.1877	1.2732	0.1329
1.31	1.32	35.4	Q96HJ9|CG055_HUMAN	Uncharacterized C7orf55 protein - Homo sapiens
1.61	1.62	8.3	Q6NUT3|CS028_HUMAN	Uncharacterized MFS-type transporter C19orf28 - Homo sapiens	1.6028	0.3011	1.4078	0.4704	2.288	0.1889
25.87	25.89	36	A6NN80|A6NN80_HUMAN	Uncharacterized protein ANXA6 (Fragment) - Homo sapiens	1.5764	0	1.9188	0	2.9802	0
6.45	16.11	22.2	A8MYK9|A8MYK9_HUMAN	Uncharacterized protein ATP2A3 - Homo sapiens	1.1448	0.3013	1.3283	0.0553	1.3433	0.2325
2.27	2.34	27.9	A6NFI0|A6NFI0_HUMAN	Uncharacterized protein BCAP29 - Homo sapiens	0.8582	0.254	1.1124	0.3409	1.2834	0.0917
15.05	15.08	45.9	Q9BRX8|CJ058_HUMAN	Uncharacterized protein C10orf58 precursor - Homo sapiens	0.7366	0.0027	0.9222	0.2531	1.0361	0.753
2.02	2.04	35.1	Q96I36|CL062_HUMAN	Uncharacterized protein C12orf62 - Homo sapiens	0.6792	0.3819	0.7374	0.4677	0.495	0.1668
2.09	2.19	12.8	Q9BQA9|CQ062_HUMAN	Uncharacterized protein C17orf62 - Homo sapiens	1.0909	0.4907	1.4021	0.1109	1.2936	0.1347
2	2	33.8	A1L188|CQ089_HUMAN	Uncharacterized protein C17orf89 - Homo sapiens
5.14	5.14	16.5	Q96ND0|CR019_HUMAN	Uncharacterized protein C18orf19 - Homo sapiens	1.1782	0.3153	1.0994	0.561	1.0481	0.8388
2.46	2.46	23.7	Q8TCD1|CR032_HUMAN	Uncharacterized protein C18orf32 - Homo sapiens
2.04	2.11	12.3	Q96DM3|MIC1_HUMAN	Uncharacterized protein C18orf8 - Homo sapiens
2	2	17.9	A8MPU7|A8MPU7_HUMAN	Uncharacterized protein C1orf151 - Homo sapiens	1.3855	0.0219	1.311	0.0417	1.2517	0.0029
3.57	3.58	21.3	Q96HY6|CT116_HUMAN	Uncharacterized protein C20orf116 precursor - Homo sapiens	1.0404	0.5094	1.1277	0.0568	1.2656	0.1677
2.16	2.17	10.2	Q8N357|CB018_HUMAN	Uncharacterized protein C2orf18 precursor - Homo sapiens	0.9303	0.8066	0.9236	0.1769	0.9235	0.5255
2.83	2.83	16.8	Q8WWC4|CB047_HUMAN	Uncharacterized protein C2orf47, mitochondrial precursor - Homo sapiens	1.0369	0.7699	0.9633	0.805	0.9903	0.9401
5.93	6.04	33.7	Q9NPL8|CC001_HUMAN	Uncharacterized protein C3orf1 - Homo sapiens	0.8442	0.0631	0.8055	0.0256	0.6717	0.0004
2.99	2.99	14.7	Q9BU61|CC060_HUMAN	Uncharacterized protein C3orf60 - Homo sapiens	0.7409	0.0154	0.637	0.2344	0.783	0.2342
1.78	1.92	11.7	Q8NC60|CD014_HUMAN	Uncharacterized protein C4orf14 - Homo sapiens	1.0441				0.9029
2.75	2.86	23.8	Q9BRT2|CF125_HUMAN	Uncharacterized protein C6orf125 - Homo sapiens	0.8381	0.6971	1.0584	0.6211	0.8574	0.6775
3.12	3.15	68.6	Q8N4H5|CI105_HUMAN	Uncharacterized protein C9orf105 - Homo sapiens	0.9205	0.2847	0.7988	0.0001	0.7629	0.0017
5.78	5.84	27.2	Q9HBL7|CI046_HUMAN	Uncharacterized protein C9orf46 - Homo sapiens	1.236	0.0376	1.0142	0.8612	0.772	0.0481
1.36	1.67	15.5	A8MVS8|A8MVS8_HUMAN	Uncharacterized protein CAMK2D - Homo sapiens
11.04	11.05	14.3	A8MZ46|A8MZ46_HUMAN	Uncharacterized protein CD97 (Fragment) - Homo sapiens	1.3268	0.0387	1.0343	0.7719	1.1088	0.2736
2.22	2.23	13.9	A6ND69|A6ND69_HUMAN	Uncharacterized protein HNRNPL - Homo sapiens
14.94	15.15	27.1	Q8N766|K0090_HUMAN	Uncharacterized protein KIAA0090 precursor - Homo sapiens	0.9396	0.314	0.9181	0.3056	0.8509	0.0177
6.21	6.21	18.8	Q14165|K0152_HUMAN	Uncharacterized protein KIAA0152 precursor - Homo sapiens	0.9337	0.2274	0.9607	0.7773	0.9083	0.6124
5.52	5.58	18.8	Q8IYS2|K2013_HUMAN	Uncharacterized protein KIAA2013 precursor - Homo sapiens	1.0381	0.7116	0.6218	0.0021	0.7561	0.0719
1.54	9.25	30.8	A6NHY4|A6NHY4_HUMAN	Uncharacterized protein TUBA4A - Homo sapiens	1.0322	0.5751	1.3874	0.4509	2.1825	0.3981
6.41	6.41	33.1	A8MWB3|A8MWB3_HUMAN	Uncharacterized protein VAMP2 - Homo sapiens	0.8969	0.6453	0.8945	0.6475	0.8043	0.2559
2.59	2.6	39.4	Q9P032|CF066_HUMAN	UPF0240 protein C6orf66 - Homo sapiens	0.7295	0.3672	0.7077	0.363	0.7229	0.2294
1.71	1.78	44.3	Q9NRP2|CP061_HUMAN	UPF0287 protein C16orf61 - Homo sapiens
4.07	4.12	12.7	Q7Z3D6|CN159_HUMAN	UPF0317 protein C14orf159, mitochondrial precursor - Homo sapiens	0.9997		1.1385		0.8443
2.02	2.02	23.1	Q5VUM1|CF057_HUMAN	UPF0369 protein C6orf57 precursor - Homo sapiens	0.9698		0.8211		0.4894
5.56	5.56	18.6	Q6IAA8|CK059_HUMAN	UPF0404 protein C11orf59 - Homo sapiens	0.9245	0.4335	1.2666	0.0065	1.4383	0.0079
2.22	2.28	28.5	Q4G0N4|CE033_HUMAN	UPF0465 protein C5orf33 - Homo sapiens	0.6415	0.3301	0.6533	0.1288	0.8783	0.5439
1.92	1.92	29.9	Q9H4I9|CV032_HUMAN	UPF0466 protein C22orf32, mitochondrial precursor - Homo sapiens	0.7026	0.0442	0.6877	0.0577	0.581	0.0102
4.96	4.99	35.5	Q9NPA0|CO024_HUMAN	UPF0480 protein C15orf24 precursor - Homo sapiens	0.9892	0.7802	1.0873	0.2189	1.1586	0.0946
5.52	5.52	18.7	Q5UCC4|CS063_HUMAN	UPF0510 protein C19orf63 precursor - Homo sapiens	0.8784	0.2416	0.946	0.607	0.8425	0.3607
2.03	2.1	14.3	Q8IWB1|K1754_HUMAN	UPF0525 protein KIAA1754 precursor - Homo sapiens
3.77	3.86	16.7	Q6NUQ4|U535_HUMAN	UPF0535 membrane protein - Homo sapiens	0.7394	0.0147	0.7051	0.0647	0.747	0.0106
10	10.13	23.4	O94874|K0776_HUMAN	UPF0555 protein KIAA0776 - Homo sapiens	0.9579	0.662	1.4841	0.0505	1.8979	0.019
7.84	7.89	27.7	Q969H8|CS010_HUMAN	UPF0556 protein C19orf10 precursor - Homo sapiens	1.0455	0.6295	1.1153	0.1967	0.9808	0.8285
7.32	7.33	64.9	Q6FGD1|Q6FGD1_HUMAN	UQCRB protein - Homo sapiens	0.9152	0.2945	0.8477	0.018	0.7851	0.0015
4.92	4.94	16.7	Q03405|UPAR_HUMAN	Urokinase plasminogen activator surface receptor precursor - Homo sapiens
3.32	4.1	13.6	P46939|UTRO_HUMAN	Utrophin - Homo sapiens	1.1233	0.2913	1.3748	0.6346	1.511	0.4263
32.59	32.62	42.9	P38606|VATA_HUMAN	Vacuolar ATP synthase catalytic subunit A - Homo sapiens	1.1487	0.0106	1.6944	0	1.6736	0
24.73	24.77	42.9	P21281|VATB2_HUMAN	Vacuolar ATP synthase subunit B, brain isoform - Homo sapiens	1.1926	0.0004	1.5458	0	1.5443	0
1.55	3.68	13	Q9H269|VPS16_HUMAN	Vacuolar protein sorting-associated protein 16 homolog - Homo sapiens
1.75	2.01	11.7	Q9P253|VPS18_HUMAN	Vacuolar protein sorting-associated protein 18 homolog - Homo sapiens
24.47	24.49	46.9	P21283|VATC1_HUMAN	Vacuolar proton pump subunit C 1 - Homo sapiens	1.2994	0.0004	1.7142	0	1.6258	0
8.98	9.11	38.1	Q9Y5K8|VATD_HUMAN	Vacuolar proton pump subunit D - Homo sapiens	1.3785	0.0145	1.619	0.1244	1.4772	0.0395
13.57	13.59	28.5	P61421|VA0D1_HUMAN	Vacuolar proton pump subunit d 1 - Homo sapiens	1.0071	0.9209	1.019	0.8255	1.0111	0.8923
5.7	5.7	52.9	Q16864|VATF_HUMAN	Vacuolar proton pump subunit F - Homo sapiens	1.0426	0.6715	1.315	0.0276	1.1454	0.2819
11.27	11.33	31.3	Q9UI12|VATH_HUMAN	Vacuolar proton pump subunit H - Homo sapiens	1.3295	0.0233	1.8748	0	1.6977	0
22.17	22.36	20.3	Q93050|VPP1_HUMAN	Vacuolar proton translocating ATPase 116 kDa subunit a isoform 1 - Homo sapiens	1.1523	0.0718	1.002	0.971	1.0112	0.9098
8.63	8.93	26.6	Q2TAI5|Q2TAI5_HUMAN	Valosin-containing protein - Homo sapiens	1.0264	0.781	1.2317	0.2802	1.1789	0.3471
5.74	5.78	28.9	P50552|VASP_HUMAN	Vasodilator-stimulated phosphoprotein - Homo sapiens	1.0253	0.9778	1.1874	0.8644	2.4498	0.4846
1.37	1.42	13.5	Q96D37|Q96D37_HUMAN	VAV1 protein - Homo sapiens	0.9483		2.7895		4.4906
4.12	4.37	15.4	Q8IWB7|WDFY1_HUMAN	WD repeat and FYVE domain-containing protein 1 - Homo sapiens	1.168	0.2884	0.8379	0.3433	0.823	0.2489
2.03	2.08	9.9	Q59ER5|Q59ER5_HUMAN	WD repeat-containing protein 1 isoform 1 variant (Fragment) - Homo sapiens	1.8317		1.448		2.1689
50.89	50.92	57.4	P49748|ACADV_HUMAN	Very long-chain specific acyl-CoA dehydrogenase, mitochondrial precursor - Homo sapiens	0.8791	0.0039	0.8731	0.0013	0.8015	0
2.97	2.99	22.5	Q9Y3E0|GOT1B_HUMAN	Vesicle transport protein GOT1B - Homo sapiens	1.2305	0.0433	1.1876	0.0191	1.227	0.0115
2.01	2.01	10	O95562|SFT2B_HUMAN	Vesicle transport protein SFT2B - Homo sapiens	0.8253	0.6422	0.9152	0.8257	2.2551	0.1803
4.14	4.16	20.3	Q9UEU0|VTI1B_HUMAN	Vesicle transport through interaction with t-SNAREs homolog 1B - Homo sapiens	1.1841	0.5154	1.0489	0.5004	1.0966	0.6669
2.34	2.39	23.2	P51809|VAMP7_HUMAN	Vesicle-associated membrane protein 7 - Homo sapiens	0.9602	0.7129	0.9452	0.7036	0.7917	0.4513
7.52	7.52	39	Q9BV40|VAMP8_HUMAN	Vesicle-associated membrane protein 8 - Homo sapiens	1.0739	0.6392	1.0216	0.8962	1.1729	0.2768
15.03	15.03	36.1	Q9P0L0|VAPA_HUMAN	Vesicle-associated membrane protein-associated protein A - Homo sapiens	0.7922	0.0129	0.9111	0.1088	1.0981	0.4429
30.97	30.99	40.5	P46459|NSF_HUMAN	Vesicle-fusing ATPase - Homo sapiens	1.0808	0.042	0.9732	0.4732	1.2877	0
14.69	14.7	42.8	O75396|SC22B_HUMAN	Vesicle-trafficking protein SEC22b - Homo sapiens	1.07	0.6005	1.1695	0.1032	1.3726	0.0237
11.79	11.8	29.2	Q12907|LMAN2_HUMAN	Vesicular integral-membrane protein VIP36 precursor - Homo sapiens	1.2856	0.0003	1.0965	0.1956	1.1052	0.1772
1.71	1.72	14.2	Q96LL9|WBS18_HUMAN	Williams-Beuren syndrome chromosomal region 18 protein - Homo sapiens	1.1333		1.1381
60.97	60.99	78.3	Q53HU8|Q53HU8_HUMAN	Vimentin variant (Fragment) - Homo sapiens	1.1291	0.0162	2.65	0	5.854	0
2.06	2.23	13.8	P18206|VINC_HUMAN	Vinculin - Homo sapiens
4.21	4.22	12.7	O76024|WFS1_HUMAN	Wolframin - Homo sapiens	0.9287	0.0841	1.0789	0.0633	0.9822	0.8882
17.74	19.1	46.6	P21796|VDAC1_HUMAN	Voltage-dependent anion-selective channel protein 1 - Homo sapiens	1.0775	0.357	0.9516	0.7147	0.8528	0.0035
19.96	19.96	44.6	P45880|VDAC2_HUMAN	Voltage-dependent anion-selective channel protein 2 - Homo sapiens	1.1607	0.0322	1.0531	0.6022	0.9164	0.3119
10.5	14	46.6	Q9Y277|VDAC3_HUMAN	Voltage-dependent anion-selective channel protein 3 - Homo sapiens	1.3709	0.0288	1.162	0.3265	0.9637	0.7924
2.48	2.48	11	Q9Y279|VSIG4_HUMAN	V-set and immunoglobulin domain-containing protein 4 precursor - Homo sapiens
1.56	1.58	10.4	Q96DZ1|XTP3B_HUMAN	XTP3-transactivated gene B protein precursor - Homo sapiens	0.8801	0.3338	0.8841	0.2392	1.1412	0.4741
6.15	6.15	34.2	Q6PKI6|Q6PKI6_HUMAN	YBX1 protein (Fragment) - Homo sapiens	1.0166	0.9539	1.84	0.0497	2.6108	0.0039
4	4.01	11	Q9Y6M5|ZNT1_HUMAN	Zinc transporter 1 - Homo sapiens	1.5312	0.3774	0.9428	0.8503	1.028	0.9103
3.25	3.31	8.8	Q8NEW0|ZNT7_HUMAN	Zinc transporter 7 - Homo sapiens	0.9703	0.9155	0.6275	0.0793	0.6974	0.2425
2	2.01	8.1	Q92504|S39A7_HUMAN	Zinc transporter SLC39A7 - Homo sapiens	1.0524	0.7693	1.0073	0.952	0.9622	0.7366
5.68	5.68	15.2	Q8N1S5|S39AB_HUMAN	Zinc transporter ZIP11 - Homo sapiens	1.4135	0.3436	1.4998	0.3532	1.9708	0.2779

## Sheet: mitochondrial II
Unused	Total	Seq.cov			iTRAQ	p-Value	iTRAQ	p-Value
ProtScore	ProtScore	(%)	SwissProt Access	Protein Name	115:114	115:114	116:114	116:114
2.15	3.06	26.1	Q15118|PDK1_HUMAN	[Pyruvate dehydrogenase [lipoamide]] kinase isozyme 1, mitochondrial precursor - Homo sapiens	0.6714	0.1582	0.6916	0.0305
3.54	3.61	33.5	Q15120|PDK3_HUMAN	[Pyruvate dehydrogenase [lipoamide]] kinase isozyme 3, mitochondrial precursor - Homo sapiens	0.9426	0.7871	0.8836	0.3195
2.62	3.91	24	P31946|1433B_HUMAN	14-3-3 protein beta/alpha - Homo sapiens
5.25	5.25	23.1	P62258|1433E_HUMAN	14-3-3 protein epsilon - Homo sapiens
3.76	5	24.7	P61981|1433G_HUMAN	14-3-3 protein gamma - Homo sapiens	1.4265		1.3052
2.02	3.87	28.6	P63104|1433Z_HUMAN	14-3-3 protein zeta/delta - Homo sapiens
2	2.02	9.9	Q8NF37|PCAT1_HUMAN	1-acylglycerophosphocholine O-acyltransferase 1 - Homo sapiens
4	4.03	15.1	Q9NUQ2|PLCE_HUMAN	1-acyl-sn-glycerol-3-phosphate acyltransferase epsilon - Homo sapiens	0.9202	0.2427	0.8126	0.067
9.87	9.9	41.3	P09543|CN37_HUMAN	2',3'-cyclic-nucleotide 3'-phosphodiesterase - Homo sapiens	1.1082	0.2203	1.0882	0.2389
2.33	2.33	35.4	Q4VXZ8|Q4VXZ8_HUMAN	2,4-dienoyl CoA reductase 2, peroxisomal - Homo sapiens	0.9055	0.4332	1.0358	0.7191
33.66	33.66	62.1	Q16698|DECR_HUMAN	2,4-dienoyl-CoA reductase, mitochondrial precursor - Homo sapiens	0.961	0.087	1.0128	0.5692
5.03	5.08	14.6	Q6L8Q7|PDE25_HUMAN	2',5'-phosphodiesterase - Homo sapiens	1.1144	0.3793	1.0369	0.7484
5.07	5.27	18.4	Q15392|DHC24_HUMAN	24-dehydrocholesterol reductase precursor - Homo sapiens	0.964	0.4551	1.0395	0.3063
9.68	9.71	44.7	P82914|RT15_HUMAN	28S ribosomal protein S15, mitochondrial precursor - Homo sapiens	0.9993	0.9915	0.834	0.0349
6.34	6.35	31.4	Q9Y3D3|RT16_HUMAN	28S ribosomal protein S16, mitochondrial precursor - Homo sapiens	1.041	0.5468	1.0108	0.8065
4.15	4.15	40.8	Q9Y2R5|RT17_HUMAN	28S ribosomal protein S17, mitochondrial precursor - Homo sapiens	1.1244	0.1904	1.0506	0.5369
4.32	4.32	42.3	Q9NVS2|RT18A_HUMAN	28S ribosomal protein S18a, mitochondrial precursor - Homo sapiens	0.9359	0.7132	1.0411	0.5613
11.21	11.21	39.9	Q9Y676|RT18B_HUMAN	28S ribosomal protein S18b, mitochondrial precursor - Homo sapiens	0.8434	0.2547	0.8761	0.2769
1.7	1.71	19.8	Q96EL2|RT24_HUMAN	28S ribosomal protein S24, mitochondrial precursor - Homo sapiens	0.8658	0.0495	0.9645	0.4622
3.77	3.77	45.4	Q9BYN8|RT26_HUMAN	28S ribosomal protein S26, mitochondrial precursor - Homo sapiens	0.9505	0.3552	0.8529	0.045
7.81	7.83	36.8	P82673|RT35_HUMAN	28S ribosomal protein S35, mitochondrial precursor - Homo sapiens	0.9877	0.749	1.0004	0.9925
12.83	12.86	55.8	Q9Y2R9|RT07_HUMAN	28S ribosomal protein S7, mitochondrial precursor - Homo sapiens	0.9173	0.2072	0.9014	0.0608
2.1	2.1	33	Q96SZ5|AEDO_HUMAN	2-aminoethanethiol dioxygenase - Homo sapiens	0.9361	0.5404	0.9896	0.9636
4.95	5	20.4	Q9UJ83|HACL1_HUMAN	2-hydroxyacyl-CoA lyase 1 - Homo sapiens	1.0524	0.7869	1.2814	0.0044
41.39	41.42	42.2	Q02218|ODO1_HUMAN	2-oxoglutarate dehydrogenase E1 component, mitochondrial precursor - Homo sapiens	0.9416	0.017	1.0229	0.353
4	4	18.4	Q9H2F3|3BHS7_HUMAN	3 beta-hydroxysteroid dehydrogenase type 7 - Homo sapiens	0.9236	0.7301	1.1476	0.1269
11.68	11.7	51.3	P42126|D3D2_HUMAN	3,2-trans-enoyl-CoA isomerase, mitochondrial precursor - Homo sapiens	0.8397	0.0151	0.8259	0.0093
4.01	4.01	35.2	Q7Z7H8|RM10_HUMAN	39S ribosomal protein L10, mitochondrial precursor - Homo sapiens	1.0714	0.6001	0.9652	0.6163
16.09	16.11	84.9	Q9Y3B7|RM11_HUMAN	39S ribosomal protein L11, mitochondrial precursor - Homo sapiens	1.0682	0.2878	0.852	0.0362
17.55	17.59	73.7	P52815|RM12_HUMAN	39S ribosomal protein L12, mitochondrial precursor - Homo sapiens	0.9836	0.7443	0.9864	0.8054
8.79	8.8	38.2	Q9BYD1|RM13_HUMAN	39S ribosomal protein L13, mitochondrial - Homo sapiens	0.8662	0.0501	0.9202	0.2125
2.03	2.03	19.3	Q6P1L8|RM14_HUMAN	39S ribosomal protein L14, mitochondrial precursor - Homo sapiens	1.1144	0.2914	1.0088	0.9525
14.19	14.26	56.1	Q9P015|RM15_HUMAN	39S ribosomal protein L15, mitochondrial precursor - Homo sapiens	1.0394	0.4258	0.9432	0.3084
5.7	5.7	39	Q9NX20|RM16_HUMAN	39S ribosomal protein L16, mitochondrial precursor - Homo sapiens	1.0467	0.4784	0.9427	0.2584
6.74	6.91	57.7	Q9NRX2|RM17_HUMAN	39S ribosomal protein L17, mitochondrial precursor - Homo sapiens	0.8045	0.0232	0.8738	0.1042
2.17	2.17	28.3	Q9H0U6|RM18_HUMAN	39S ribosomal protein L18, mitochondrial precursor - Homo sapiens	0.6866	0.0038	0.8668	0.1889
7.64	7.64	47.6	P49406|RM19_HUMAN	39S ribosomal protein L19, mitochondrial precursor - Homo sapiens	0.9761	0.6295	0.9292	0.0812
3.32	3.34	34.8	Q5T653|RM02_HUMAN	39S ribosomal protein L2, mitochondrial precursor - Homo sapiens	0.9342	0.334	0.9496	0.123
4.5	4.52	45	Q9BYC9|RM20_HUMAN	39S ribosomal protein L20, mitochondrial precursor - Homo sapiens	0.8638	0.0667	0.891	0.2203
1.47	1.47	36.4	Q7Z2W9|RM21_HUMAN	39S ribosomal protein L21, mitochondrial precursor - Homo sapiens	0.957	0.5338	0.9891	0.7294
8.07	8.09	50.5	Q9NWU5|RM22_HUMAN	39S ribosomal protein L22, mitochondrial precursor - Homo sapiens	0.887	0.3157	0.9053	0.1354
7.68	7.68	45.8	Q96A35|RM24_HUMAN	39S ribosomal protein L24, mitochondrial precursor - Homo sapiens	0.9826	0.6152	1.0064	0.8988
2.63	2.63	26.6	Q9BYC8|RM32_HUMAN	39S ribosomal protein L32, mitochondrial precursor - Homo sapiens	1.0008	0.9903	1.0417	0.4199
2.92	2.92	53.3	Q9BQ48|RM34_HUMAN	39S ribosomal protein L34, mitochondrial precursor - Homo sapiens	1.0941		0.8807
2.16	2.16	25	Q9NZE8|RM35_HUMAN	39S ribosomal protein L35, mitochondrial precursor - Homo sapiens	1.1951	0.0547	1.0215	0.7966
15.46	15.54	49.2	Q9BZE1|RM37_HUMAN	39S ribosomal protein L37, mitochondrial precursor - Homo sapiens	0.9532	0.3273	0.9979	0.9716
12.13	12.14	37.6	Q96DV4|RM38_HUMAN	39S ribosomal protein L38, mitochondrial precursor - Homo sapiens	0.96	0.5726	0.9089	0.0584
5.19	5.23	36.9	Q9NQ50|RM40_HUMAN	39S ribosomal protein L40, mitochondrial precursor - Homo sapiens	1.075	0.2975	0.934	0.5862
3.59	3.6	30.7	Q8IXM3|RM41_HUMAN	39S ribosomal protein L41, mitochondrial precursor - Homo sapiens	0.7559	0.0833	0.9721	0.7701
6.71	6.81	37	Q9H9J2|RM44_HUMAN	39S ribosomal protein L44, mitochondrial precursor - Homo sapiens	0.9409	0.3912	1.0892	0.381
5.25	5.29	30.4	Q9BRJ2|RM45_HUMAN	39S ribosomal protein L45, mitochondrial precursor - Homo sapiens	1.0496	0.2026	0.9329	0.1925
11.44	11.45	38.4	Q9H2W6|RM46_HUMAN	39S ribosomal protein L46, mitochondrial precursor - Homo sapiens	0.9359	0.1793	1.0037	0.9539
2	2.02	16	Q96GC5|RM48_HUMAN	39S ribosomal protein L48, mitochondrial precursor - Homo sapiens	0.8297	0.2598	0.9738	0.5443
2.08	2.08	51.6	Q4U2R6|RM51_HUMAN	39S ribosomal protein L51, mitochondrial precursor - Homo sapiens	1.0343	0.5091	0.92	0.0969
4.01	4.01	68.8	Q96EL3|RM53_HUMAN	39S ribosomal protein L53, mitochondrial precursor - Homo sapiens	0.914	0.1669	0.8308	0.0176
1.55	1.55	35.9	Q7Z7F7|RM55_HUMAN	39S ribosomal protein L55, mitochondrial precursor - Homo sapiens	1.0928	0.2981	1.0212	0.9203
10.24	10.62	64.4	Q9BYD2|RM09_HUMAN	39S ribosomal protein L9, mitochondrial precursor - Homo sapiens	1.0187	0.7572	0.9223	0.2619
18.7	18.7	69.3	Q99714|HCD2_HUMAN	3-hydroxyacyl-CoA dehydrogenase type-2 - Homo sapiens	0.9731	0.5901	0.9179	0.0769
16.05	16.06	52.6	Q6NVY1|HIBCH_HUMAN	3-hydroxyisobutyryl-CoA hydrolase, mitochondrial precursor - Homo sapiens	1.0682	0.0248	1.0147	0.6443
16.47	16.5	49.1	P09110|THIK_HUMAN	3-ketoacyl-CoA thiolase, peroxisomal precursor - Homo sapiens	0.9645	0.5655	0.8233	0.0188
2.11	2.19	11.1	Q9NWU1|OXSM_HUMAN	3-oxoacyl-[acyl-carrier-protein] synthase, mitochondrial precursor - Homo sapiens	1.2175	0.5302	1.1588	0.1867
2.96	2.98	25.2	P62263|RS14_HUMAN	40S ribosomal protein S14 - Homo sapiens	1.9581		1.6507
4.55	4.58	50.5	P46781|RS9_HUMAN	40S ribosomal protein S9 - Homo sapiens	0.7947	0.004	1.3724	0.0006
10.06	10.1	30.7	Q9BRK5|CAB45_HUMAN	45 kDa calcium-binding protein precursor - Homo sapiens	1.2358	0.001	0.8912	0.223
26.39	26.41	45	P08195|4F2_HUMAN	4F2 cell-surface antigen heavy chain - Homo sapiens	1.1294	0.0004	1.0494	0.1638
14.17	16.12	44.5	P49189|AL9A1_HUMAN	4-trimethylaminobutyraldehyde dehydrogenase - Homo sapiens	0.9903	0.8214	0.9631	0.7165
5.53	5.54	32.5	P49914|MTHFS_HUMAN	5-formyltetrahydrofolate cyclo-ligase - Homo sapiens	1.0659	0.6101	0.9265	0.2523
1.32	1.33	46.6	P56378|68MP_HUMAN	6.8 kDa mitochondrial proteolipid - Homo sapiens	0.8311	0.1105	1.0536	0.3804
110.85	110.87	80.5	P10809|CH60_HUMAN	60 kDa heat shock protein, mitochondrial precursor - Homo sapiens	1.0062	0.8387	1.0097	0.7159
13.79	13.79	44.8	P05388|RLA0_HUMAN	60S acidic ribosomal protein P0 - Homo sapiens	1.0852	0.2018	1.1586	0.0052
6.68	6.86	45.6	P62906|RL10A_HUMAN	60S ribosomal protein L10a - Homo sapiens	1.1362	0.0712	1.2281	0.0004
8.87	8.88	55	Q6NZ55|Q6NZ55_HUMAN	60S ribosomal protein L13 - Homo sapiens
2	8.88	55	Q567Q8|Q567Q8_HUMAN	60S ribosomal protein L13 - Homo sapiens
3.02	3.03	45.3	P40429|RL13A_HUMAN	60S ribosomal protein L13a - Homo sapiens	1.5188	0.0105	1.0904	0.2231
2.11	2.11	26.1	P18621|RL17_HUMAN	60S ribosomal protein L17 - Homo sapiens	1.1691	0.466	1.49	0.2447
10.17	10.17	48.4	Q07020|RL18_HUMAN	60S ribosomal protein L18 - Homo sapiens	1.0357	0.6868	1.2001	0.0341
4.22	4.23	48.9	Q02543|RL18A_HUMAN	60S ribosomal protein L18a - Homo sapiens	1.1459	0.0209	1.1024	0.0304
2.83	2.83	27.3	P35268|RL22_HUMAN	60S ribosomal protein L22 - Homo sapiens	1.6953	0.0363	1.6341	0.1899
7.51	7.51	58.1	P61353|RL27_HUMAN	60S ribosomal protein L27 - Homo sapiens	1.4073	0.0001	1.1679	0.0707
2.8	3.26	50.4	P46779|RL28_HUMAN	60S ribosomal protein L28 - Homo sapiens	1.4709	0.1196	1.1795	0.3578
7.67	7.71	30.5	P39023|RL3_HUMAN	60S ribosomal protein L3 - Homo sapiens	1.1905	0.0254	1.3868	0
2.87	2.87	47	P62888|RL30_HUMAN	60S ribosomal protein L30 - Homo sapiens	1.5248	0.0001	1.5455	0.01
1.71	1.73	39	P42766|RL35_HUMAN	60S ribosomal protein L35 - Homo sapiens	1.1492	0.0597	1.2116	0.229
3.82	3.82	71.8	P18077|RL35A_HUMAN	60S ribosomal protein L35a - Homo sapiens	1.0444	0.5223	1.2003	0.0006
4.49	4.49	37.1	Q9Y3U8|RL36_HUMAN	60S ribosomal protein L36 - Homo sapiens	1.3703	0.0011	1.2102	0.0075
8.42	8.43	44.3	P36578|RL4_HUMAN	60S ribosomal protein L4 - Homo sapiens	1.5246	0	1.0355	0.5487
9.74	9.83	54.2	Q02878|RL6_HUMAN	60S ribosomal protein L6 - Homo sapiens	1.3905	0	1.1591	0.0483
6.77	6.77	33.1	P62917|RL8_HUMAN	60S ribosomal protein L8 - Homo sapiens	1.3536	0.0001	1.2482	0.0039
3.68	3.76	20.7	P52209|6PGD_HUMAN	6-phosphogluconate dehydrogenase, decarboxylating - Homo sapiens	1.5869	0.0388	1.6661	0.0119
84.42	84.58	67.4	P11021|GRP78_HUMAN	78 kDa glucose-regulated protein precursor - Homo sapiens	0.9462	0.0221	1.1775	0
5.79	5.79	22.1	Q9UBM7|DHCR7_HUMAN	7-dehydrocholesterol reductase - Homo sapiens	0.8538	0.0047	1.12	0.0275
8.03	8.06	31.4	Q96PT8|Q96PT8_HUMAN	ABC-transporter - Homo sapiens	1.122	0.1773	1.1633	0.0406
14.29	14.43	41.2	Q9NUJ1|ABHDA_HUMAN	Abhydrolase domain-containing protein 10, mitochondrial precursor - Homo sapiens	0.9819	0.7001	0.9719	0.5282
5.4	5.43	26	Q8NFV4|ABHDB_HUMAN	Abhydrolase domain-containing protein 11 - Homo sapiens	0.8666	0.2253	0.8492	0.0312
7.82	7.83	31.2	Q8N2K0|ABD12_HUMAN	Abhydrolase domain-containing protein 12 - Homo sapiens	0.8189	0.338	0.9774	0.8546
6.18	6.21	29.3	A1L0T0|ILVBL_HUMAN	Acetolactate synthase-like protein - Homo sapiens	0.9214	0.1369	1.1609	0.0142
34.86	34.9	61.6	P24752|THIL_HUMAN	Acetyl-CoA acetyltransferase, mitochondrial precursor - Homo sapiens	1.1168	0.0041	0.8935	0.0001
18.87	18.91	58.7	Q13510|ASAH1_HUMAN	Acid ceramidase precursor - Homo sapiens	1.0302	0.4585	1.093	0.1175
2.27	2.35	60.2	Q7Z612|Q7Z612_HUMAN	Acidic ribosomal phosphoprotein P1 - Homo sapiens	1.0157	0.7793	1.0234	0.7743
67.79	67.87	65.1	Q99798|ACON_HUMAN	Aconitate hydratase, mitochondrial precursor - Homo sapiens	0.9338	0.0097	0.9087	0
2.01	31.61	54.2	Q13707|Q13707_HUMAN	ACTA2 protein (Fragment) - Homo sapiens
80.66	80.66	79.3	Q96HG5|Q96HG5_HUMAN	Actin, beta (Fragment) - Homo sapiens	1.3625	0	1.4821	0
10.51	10.93	30.6	Q1HE25|Q1HE25_HUMAN	Actinin alpha 1 isoform b - Homo sapiens	2.2697	0	1.2946	0.0591
7.95	8.04	34.5	P61160|ARP2_HUMAN	Actin-related protein 2 - Homo sapiens	1.5733	0.018	1.4715	0.0062
4.5	4.5	30.6	O15143|ARC1B_HUMAN	Actin-related protein 2/3 complex subunit 1B - Homo sapiens	1.366	0.0429	1.3498	0.1219
5.79	5.91	48.8	P59998|ARPC4_HUMAN	Actin-related protein 2/3 complex subunit 4 - Homo sapiens	1.3946	0.0078	1.2759	0.0594
3.51	3.61	48.3	O15511|ARPC5_HUMAN	Actin-related protein 2/3 complex subunit 5 - Homo sapiens	1.5089	0.0024	1.2094	0.0993
2	2.02	34.3	Q59G24|Q59G24_HUMAN	Activated RNA polymerase II transcription cofactor 4 variant (Fragment) - Homo sapiens	1.3488		1.5783
7.64	7.64	33.8	Q49SH3|Q49SH3_HUMAN	Activin receptor interacting protein 5 - Homo sapiens	1.0208	0.6919	1.0619	0.3587
9.5	9.52	52.6	O14561|ACPM_HUMAN	Acyl carrier protein, mitochondrial precursor - Homo sapiens	1.0934	0.153	1.1193	0.0522
29.72	30.08	56.2	Q9H845|ACAD9_HUMAN	Acyl-CoA dehydrogenase family member 9, mitochondrial precursor - Homo sapiens	0.98	0.5413	1.0217	0.5046
15.06	15.08	33.3	Q96CM8|ACSF2_HUMAN	Acyl-CoA synthetase family member 2, mitochondrial precursor - Homo sapiens	0.9163	0.0812	0.8611	0.0008
10.81	10.83	34.9	Q4G176|ACSF3_HUMAN	Acyl-CoA synthetase family member 3, mitochondrial precursor - Homo sapiens	0.9962	0.9543	0.9394	0.2616
12.16	14.09	33.6	Q5JWV8|Q5JWV8_HUMAN	Acyl-CoA synthetase long-chain family member 4 - Homo sapiens	1.0555	0.2506	0.9766	0.7278
16.23	16.23	40	Q7Z5G3|Q7Z5G3_HUMAN	Acyl-CoA synthetase short-chain family member 1 - Homo sapiens	1.0092	0.8568	0.8945	0.0304
3.56	3.63	15.7	Q92604|LGAT1_HUMAN	Acyl-CoA:lysophosphatidylglycerol acyltransferase 1 - Homo sapiens	0.8988	0.3029	1.048	0.7097
2.04	2.07	11.4	Q5T8D3|ACBD5_HUMAN	Acyl-CoA-binding domain-containing protein 5 - Homo sapiens
3.06	3.09	48.3	P07108|ACBP_HUMAN	Acyl-CoA-binding protein - Homo sapiens	0.9898	0.9499	1.1153	0.2865
28.5	28.5	54.8	Q5T4U5|Q5T4U5_HUMAN	Acyl-Coenzyme A dehydrogenase, C-4 to C-12 straight chain - Homo sapiens	0.9115	0.0006	0.9385	0.0052
13.62	13.63	35.4	Q5SQN6|Q5SQN6_HUMAN	Acyl-Coenzyme A dehydrogenase, short/branched chain - Homo sapiens	1.0033	0.9544	0.8986	0.0536
3.73	3.75	17.6	Q15067|ACOX1_HUMAN	Acyl-coenzyme A oxidase 1, peroxisomal - Homo sapiens	0.9237	0.1466	0.9742	0.5522
9.67	9.74	32.1	O15254|ACOX3_HUMAN	Acyl-coenzyme A oxidase 3, peroxisomal - Homo sapiens	1.0794	0.148	1.0002	0.9962
20.23	20.25	48.3	Q9Y305|ACOT9_HUMAN	Acyl-coenzyme A thioesterase 9 - Homo sapiens	1.0264	0.6804	1.0435	0.1601
12.37	12.4	30.8	Q53H12|AGK_HUMAN	Acylglycerol kinase, mitochondrial precursor - Homo sapiens	0.9433	0.2695	0.9897	0.8539
3.59	3.62	14.4	O14672|ADA10_HUMAN	ADAM 10 precursor - Homo sapiens	0.9585	0.6389	0.9592	0.8103
5.67	16.65	34.4	Q53ET1|Q53ET1_HUMAN	Adaptor-related protein complex 2, alpha 2 subunit variant (Fragment) - Homo sapiens	1.0601	0.3728	0.8176	0.0449
5.68	5.68	20.4	Q8TB61|S35B2_HUMAN	Adenosine 3'-phospho 5'-phosphosulfate transporter 1 - Homo sapiens	1.0285	0.8087	1.0012	0.984
3.9	3.95	16.5	P51828|ADCY7_HUMAN	Adenylate cyclase type 7 - Homo sapiens	1.0443	0.865	0.9306	0.4987
27.69	27.72	77.2	Q5EB54|Q5EB54_HUMAN	Adenylate kinase 2 - Homo sapiens	0.9694	0.3201	0.8375	0
12.39	12.4	50.7	P27144|KAD4_HUMAN	Adenylate kinase isoenzyme 4, mitochondrial - Homo sapiens	1.0571	0.3616	0.9231	0.0635
1.8	1.84	24.8	Q01518|CAP1_HUMAN	Adenylyl cyclase-associated protein 1 - Homo sapiens	1.5483	0.1308	1.3381	0.3743
15.87	15.87	27.4	Q9HDC9|APMAP_HUMAN	Adipocyte plasma membrane-associated protein - Homo sapiens	0.935	0.0496	1.1642	0.0011
9.67	41.61	78.9	Q59EI9|Q59EI9_HUMAN	ADP,ATP carrier protein, liver isoform T2 variant (Fragment) - Homo sapiens	0.967	0.8882	0.8609	0.2384
43.58	43.59	75.5	P05141|ADT2_HUMAN	ADP/ATP translocase 2 - Homo sapiens	1.0812	0.4391	0.8948	0.0539
10.11	10.14	34.2	Q9BRR6|ADPGK_HUMAN	ADP-dependent glucokinase - Homo sapiens	0.9523	0.3554	0.9719	0.8367
3.61	3.62	37.4	Q9BW91|NUDT9_HUMAN	ADP-ribose pyrophosphatase, mitochondrial precursor - Homo sapiens	1.0715	0.1574	0.9867	0.928
5.42	5.46	48.1	P61204|ARF3_HUMAN	ADP-ribosylation factor 3 - Homo sapiens	1.485	0.0053	1.2587	0.0241
2.36	2.38	27	Q9NXU5|ARL15_HUMAN	ADP-ribosylation factor-like protein 15 - Homo sapiens	1.2479	0.0602	1.1337	0.3093
2.01	7.78	46.2	Q96BM9|ARL8A_HUMAN	ADP-ribosylation factor-like protein 8A - Homo sapiens	1.6529	0.1319	1.1359	0.0625
8.79	8.83	51.6	Q9NVJ2|ARL8B_HUMAN	ADP-ribosylation factor-like protein 8B - Homo sapiens	1.1768	0.0578	1.0416	0.395
6.31	6.35	56	P10109|ADX_HUMAN	Adrenodoxin, mitochondrial precursor - Homo sapiens	0.9573	0.239	0.8635	0.0007
2.01	2.02	29.5	Q6P4F2|ADXL_HUMAN	Adrenodoxin-like protein, mitochondrial precursor - Homo sapiens	0.5925	0.4204	0.6794	0.1212
9.2	9.21	25.6	O43488|ARK72_HUMAN	Aflatoxin B1 aldehyde reductase member 2 - Homo sapiens	0.9979	0.9801	1.015	0.869
2.16	2.19	16.1	Q6FGA4|Q6FGA4_HUMAN	AKR1B1 protein - Homo sapiens	1.0394	0.7078	1.0054	0.9312
18.59	18.67	36.4	Q3KQU2|Q3KQU2_HUMAN	Aldehyde dehydrogenase 18 family, member A1 - Homo sapiens	1.0068	0.8664	1	1
3.98	7.72	32.3	P43353|AL3B1_HUMAN	Aldehyde dehydrogenase 3B1 - Homo sapiens	0.9944	0.9229	0.8598	0.0107
17.2	17.2	47.1	Q5JNV6|Q5JNV6_HUMAN	Aldehyde dehydrogenase 4 family, member A1 - Homo sapiens	1.0085	0.843	0.8921	0.005
12.59	12.61	41.3	Q53H94|Q53H94_HUMAN	Aldehyde dehydrogenase 6A1 variant (Fragment) - Homo sapiens	1.0109	0.8217	0.944	0.1596
5.66	7.45	34.8	P30837|AL1B1_HUMAN	Aldehyde dehydrogenase X, mitochondrial precursor - Homo sapiens	1.0546	0.4489	1.0714	0.5268
18.61	20.36	47	Q6I9T3|Q6I9T3_HUMAN	ALDH3A2 protein - Homo sapiens	1.0166	0.6967	1.0697	0.2488
22.76	22.77	43.6	O00116|ADAS_HUMAN	Alkyldihydroxyacetonephosphate synthase, peroxisomal precursor - Homo sapiens	0.9396	0.2437	1.0023	0.9579
11.96	12.02	25.9	Q6NUM9|RETST_HUMAN	All-trans-retinol 13,14-reductase precursor - Homo sapiens	0.9924	0.9042	1.0715	0.1353
5.88	5.89	22.8	Q10469|MGAT2_HUMAN	Alpha-1,6-mannosyl-glycoprotein 2-beta-N-acetylglucosaminyltransferase - Homo sapiens	1.1517	0.1774	0.8391	0.0773
2.85	2.89	11.1	P01023|A2MG_HUMAN	Alpha-2-macroglobulin precursor - Homo sapiens	0.7049	0.0637	0.5856	0.1196
18.35	18.39	59.4	P30533|AMRP_HUMAN	Alpha-2-macroglobulin receptor-associated protein precursor - Homo sapiens	1.0203	0.5133	1.1485	0
2.97	4.98	24.1	O43707|ACTN4_HUMAN	Alpha-actinin-4 - Homo sapiens	1.6237	0.2846	1.232	0.0267
9.71	9.72	32.8	Q6LER7|Q6LER7_HUMAN	Alpha-galactosidase A (Fragment) - Homo sapiens	0.9867	0.8613	0.9615	0.3771
29.34	29.36	58.9	Q7LDY7|Q7LDY7_HUMAN	Alpha-KG-E2 - Homo sapiens	0.9469	0.1108	1.0724	0.0563
10.01	10.09	20.1	Q16706|MA2A1_HUMAN	Alpha-mannosidase 2 - Homo sapiens	1.1807	0.015	1.0249	0.6524
7.58	7.59	27.3	P17050|NAGAB_HUMAN	Alpha-N-acetylgalactosaminidase precursor - Homo sapiens	0.877	0.0802	0.9475	0.4159
9.41	9.41	29.1	P54802|ANAG_HUMAN	Alpha-N-acetylglucosaminidase precursor - Homo sapiens	0.9399	0.2883	0.8521	0.014
11.34	11.37	33.9	P54920|SNAA_HUMAN	Alpha-soluble NSF attachment protein - Homo sapiens	0.9704	0.56	0.9198	0.2248
6.67	6.72	21	P27338|AOFB_HUMAN	Amine oxidase [flavin-containing] B - Homo sapiens	0.8736	0.0198	1.0103	0.8641
10.11	10.19	23.9	P12821|ACE_HUMAN	Angiotensin-converting enzyme, somatic isoform precursor - Homo sapiens	1.1447	0.073	0.9497	0.4368
1.33	1.42	12.5	Q92625|ANS1A_HUMAN	Ankyrin repeat and SAM domain-containing protein 1A - Homo sapiens
1.39	1.82	20.9	Q8N283|ANR35_HUMAN	Ankyrin repeat domain-containing protein 35 - Homo sapiens
1.34	3.5	14.2	Q01484|ANK2_HUMAN	Ankyrin-2 - Homo sapiens	0.8952	0.2639	1.0632	0.7538
17.01	17.05	52	Q5TZZ9|Q5TZZ9_HUMAN	Annexin A1 - Homo sapiens	1.6644	0	1.8787	0
42.13	42.14	71.7	Q8TBV2|Q8TBV2_HUMAN	Annexin A2 - Homo sapiens	1.8659	0	1.3205	0
28.63	28.7	45.8	P08133|ANXA6_HUMAN	Annexin A6 - Homo sapiens	1.7022	0	1.6882	0
2.22	2.23	21.9	Q53HM8|Q53HM8_HUMAN	Annexin VII isoform 1 variant (Fragment) - Homo sapiens	1.7363	0.03	1.5203	0.0561
16.93	16.94	41.2	Q6ICS0|Q6ICS0_HUMAN	ANXA11 protein (Fragment) - Homo sapiens	1.2854	0	1.2388	0
12.14	13.83	40.5	Q6P452|Q6P452_HUMAN	ANXA4 protein - Homo sapiens	1.3938	0	1.1793	0.0093
15.04	16.28	41.3	Q6FHB3|Q6FHB3_HUMAN	ANXA5 protein (Fragment) - Homo sapiens	1.8297	0	1.9456	0
5.68	5.79	31.9	O43747|AP1G1_HUMAN	AP-1 complex subunit gamma-1 - Homo sapiens	1.098	0.6194	1.0014	0.9946
2.02	12.24	32.8	Q86X54|Q86X54_HUMAN	AP1B1 protein - Homo sapiens	1.1531	0.2155	0.8566	0.2795
35.23	35.26	48.9	O95782|AP2A1_HUMAN	AP-2 complex subunit alpha-1 - Homo sapiens	1.0415	0.6177	0.7983	0.0008
10.54	10.54	44.8	Q96CW1|AP2M1_HUMAN	AP-2 complex subunit mu-1 - Homo sapiens	1.1831	0.0006	0.8594	0.0265
5.97	5.99	23.2	Q0VD83|AB48R_HUMAN	Apolipoprotein B-100 receptor - Homo sapiens	1.4717	0.2137	1.4454	0.0867
2.37	2.37	19.3	P02654|APOC1_HUMAN	Apolipoprotein C-I precursor - Homo sapiens	0.9651	0.8077	1.9764	0.0796
24.94	25	62.8	P02649|APOE_HUMAN	Apolipoprotein E precursor - Homo sapiens	0.8088	0	0.6755	0
5.96	5.96	30.3	Q9BUR5|APOO_HUMAN	Apolipoprotein O precursor - Homo sapiens	0.9075	0.3723	0.8304	0.0197
9.24	9.25	51.3	Q9BQE5|APOL2_HUMAN	Apolipoprotein-L2 - Homo sapiens	1.1643	0.0008	1.1198	0.0085
26.39	26.39	54.8	O95831|AIFM1_HUMAN	Apoptosis-inducing factor 1, mitochondrial precursor - Homo sapiens	0.9306	0.0465	0.9278	0.0208
3	3.02	21.7	P09917|LOX5_HUMAN	Arachidonate 5-lipoxygenase - Homo sapiens	0.8093	0.0103	1.0187	0.8613
6.79	6.79	45.3	P20292|AL5AP_HUMAN	Arachidonate 5-lipoxygenase-activating protein - Homo sapiens	0.762	0.0164	0.9398	0.6381
13.35	13.39	57.6	Q6ICQ8|Q6ICQ8_HUMAN	ARHG protein (Fragment) - Homo sapiens	1.1446	0.0093	0.9732	0.5854
2.76	2.81	19.9	Q9NVT9|ARMC1_HUMAN	Armadillo repeat-containing protein 1 - Homo sapiens	1.0406	0.7252	0.98	0.9432
1.62	1.66	22.4	Q8N2F6|ARM10_HUMAN	Armadillo repeat-containing protein 10 - Homo sapiens	1.505	0.1325	1.4013	0.0464
2.59	2.63	22.4	Q9UH62|ARMX3_HUMAN	Armadillo repeat-containing X-linked protein 3 - Homo sapiens	1.078	0.5706	1.152	0.1376
2.7	2.73	17.8	Q59EM5|Q59EM5_HUMAN	Arrestin beta 2 isoform 1 variant (Fragment) - Homo sapiens	1.0077	0.9743	0.861	0.5724
17.1	17.11	47.1	Q6PIU2|ADCL1_HUMAN	Arylacetamide deacetylase-like 1 - Homo sapiens	0.9101	0.0113	1.1503	0.0002
7.04	7.06	23.3	P15848|ARSB_HUMAN	Arylsulfatase B precursor - Homo sapiens	1.0499	0.5034	0.9198	0.1831
38.88	38.89	61.2	P00505|AATM_HUMAN	Aspartate aminotransferase, mitochondrial precursor - Homo sapiens	0.8694	0.0002	0.8741	0
22.11	22.12	34.7	Q12797|ASPH_HUMAN	Aspartyl/asparaginyl beta-hydroxylase - Homo sapiens	1.0166	0.7511	1.0873	0.0751
2.07	2.11	19.8	P14868|SYDC_HUMAN	Aspartyl-tRNA synthetase, cytoplasmic - Homo sapiens
5.51	5.6	25.7	Q6DD88|ATLA3_HUMAN	Atlastin-3 - Homo sapiens	0.9757	0.7025	1.1682	0.042
3.03	3.05	34.5	A6YWX8|A6YWX8_HUMAN	ATP synthase F0 subunit 6 - Homo sapiens	1.1006	0.3916	0.6258	0.0118
19.41	20.27	59.4	Q6I9V2|Q6I9V2_HUMAN	ATP synthase gamma chain - Homo sapiens	0.9734	0.3272	1.0114	0.6094
2.02	2.02	9.2	Q06055|AT5G2_HUMAN	ATP synthase lipid-binding protein, mitochondrial precursor - Homo sapiens	1.0576	0.1984	0.9117	0.0204
4.04	4.08	23.2	Q8N5M1|ATPF2_HUMAN	ATP synthase mitochondrial F1 complex assembly factor 2, mitochondrial precursor - Homo sapiens	0.8791	0.1029	0.8847	0.4205
2	2.01	30.9	Q5S8Z2|Q5S8Z2_HUMAN	ATP synthase protein 8 - Homo sapiens	0.8954	0.4539	1.0592	0.5819
1.71	2.68	29.2	Q4GDK0|Q4GDK0_HUMAN	ATP synthase subunit a - Homo sapiens	1.0442	0.4708	0.9229	0.6289
116.85	116.85	85.5	P25705|ATPA_HUMAN	ATP synthase subunit alpha, mitochondrial precursor - Homo sapiens	1.0134	0.4414	1.0171	0.3139
137.41	137.41	94.1	P06576|ATPB_HUMAN	ATP synthase subunit beta, mitochondrial precursor - Homo sapiens	0.9586	0.0286	0.9695	0.0923
15.52	15.53	73.3	O75947|ATP5H_HUMAN	ATP synthase subunit d, mitochondrial - Homo sapiens	1.0608	0.0213	1.0486	0.0429
8.03	8.05	68.1	P56385|ATP5I_HUMAN	ATP synthase subunit e, mitochondrial - Homo sapiens	0.9566	0.4343	0.9655	0.5273
12.59	12.6	71.8	O75964|ATP5L_HUMAN	ATP synthase subunit g, mitochondrial - Homo sapiens	1.0391	0.4352	1.0787	0.0823
36.18	36.21	83.6	P48047|ATPO_HUMAN	ATP synthase subunit O, mitochondrial precursor - Homo sapiens	0.9411	0.2033	0.8659	0
1.41	1.46	32.1	Q99766|ATP5S_HUMAN	ATP synthase subunit s, mitochondrial precursor - Homo sapiens	0.9627	0.6279	1.0841	0.5632
3.55	3.63	30	Q9NW81|AT5SL_HUMAN	ATP synthase subunit s-like protein - Homo sapiens	1.1059	0.2685	0.9064	0.2044
6.63	6.64	36.6	Q6LEU2|Q6LEU2_HUMAN	ATP1B1 protein (Fragment) - Homo sapiens	1.0586	0.2045	1.173	0.0022
33.25	33.51	76.2	Q6FG90|Q6FG90_HUMAN	ATP5D protein - Homo sapiens	1.0458	0.5063	1.0273	0.7519
15.16	15.23	75	Q6IB54|Q6IB54_HUMAN	ATP5J protein - Homo sapiens	1.0651	0.1793	1.1045	0.0228
7.21	7.28	44.7	Q6IBB3|Q6IBB3_HUMAN	ATP5J2 protein - Homo sapiens	1.2391	0.2856	1.2736	0.1851
12.22	12.22	55.9	Q6IB33|Q6IB33_HUMAN	ATP6V1G1 protein - Homo sapiens	0.9799	0.6898	1.0785	0.2293
32.37	32.39	57.7	Q9NVI7|ATD3A_HUMAN	ATPase family AAA domain-containing protein 3A - Homo sapiens	0.9816	0.6509	0.9701	0.5347
2.1	20.77	44.9	Q5T9A4|ATD3B_HUMAN	ATPase family AAA domain-containing protein 3B - Homo sapiens	0.8893	0.1832	1.0057	0.9406
11.78	11.8	57.5	Q9UII2|ATIF1_HUMAN	ATPase inhibitor, mitochondrial precursor - Homo sapiens	1.2143	0	1.2042	0.0356
23.22	23.23	74.3	Q53Y06|Q53Y06_HUMAN	ATPase, H+ transporting, lysosomal 31kDa, V1 subunit E isoform 1 - Homo sapiens	0.8859	0.0002	0.9803	0.566
12.68	12.76	47	Q9NRK6|ABCBA_HUMAN	ATP-binding cassette sub-family B member 10, mitochondrial precursor - Homo sapiens	0.8586	0.0465	0.9048	0.3212
6.44	6.46	30.7	O75027|ABCB7_HUMAN	ATP-binding cassette sub-family B member 7, mitochondrial precursor - Homo sapiens	0.8638	0.0096	0.9568	0.2724
7.77	7.84	35.4	Q9NUT2|ABCB8_HUMAN	ATP-binding cassette sub-family B member 8, mitochondrial precursor - Homo sapiens	1.0486	0.7256	0.9968	0.9762
11.28	11.34	26.7	P33897|ABCD1_HUMAN	ATP-binding cassette sub-family D member 1 - Homo sapiens	0.8488	0.0332	0.8917	0.1788
5.82	6.32	24.6	P28288|ABCD3_HUMAN	ATP-binding cassette sub-family D member 3 - Homo sapiens	0.981	0.758	1.1165	0.1335
2.75	2.91	16.2	Q59H05|Q59H05_HUMAN	ATP-binding cassette, sub-family C, member 3 isoform MRP3 variant (Fragment) - Homo sapiens	1.064	0.7789	0.9799	0.8855
15.25	15.28	46	O76031|CLPX_HUMAN	ATP-dependent Clp protease ATP-binding subunit clpX-like, mitochondrial precursor - Homo sapiens	0.8269	0.0069	0.8327	0.0613
12.6	12.66	25.5	Q96TA2|YMEL1_HUMAN	ATP-dependent metalloprotease YME1L1 - Homo sapiens	1.0291	0.4886	1.104	0.0505
6.25	6.45	28.2	Q8IYB8|SUV3_HUMAN	ATP-dependent RNA helicase SUPV3L1, mitochondrial precursor - Homo sapiens	1.0586	0.4185	1.0032	0.9606
8.04	8.06	24.7	Q6UW11|Q6UW11_HUMAN	ATWD578 - Homo sapiens	0.8996	0.1158	0.8519	0.0274
2.06	2.06	18.9	Q6UWH2|Q6UWH2_HUMAN	AVLL5809 - Homo sapiens	1.0475	0.8372	1.0462	0.6043
5	5.03	28.4	Q5U676|Q5U676_HUMAN	B3GAT3 protein (Fragment) - Homo sapiens	1.0123	0.8525	0.9915	0.8674
8.2	8.2	36	Q6I9T6|Q6I9T6_HUMAN	BAK1 protein - Homo sapiens	0.9496	0.0986	0.8161	0.0142
1.7	1.71	28.1	O75531|BAF_HUMAN	Barrier-to-autointegration factor - Homo sapiens	0.8859		0.9937
2.06	2.09	46.9	Q9NYG7|Q9NYG7_HUMAN	Bax-sigma - Homo sapiens	1.5376	0.0312	1.8086	0.0037
20.19	20.51	52.4	Q53G72|Q53G72_HUMAN	B-cell receptor-associated protein 31 variant (Fragment) - Homo sapiens	1.0178	0.3679	1.1336	0
8.98	9.18	40.6	Q96G95|Q96G95_HUMAN	BCKDK protein - Homo sapiens	1.0546	0.4363	1.0867	0.2448
4.53	4.53	20.2	Q96LW7|BINCA_HUMAN	Bcl10-interacting CARD protein - Homo sapiens	0.9721	0.8309	0.8922	0.2912
8.86	8.89	27	Q9BXK5|B2L13_HUMAN	Bcl-2-like 13 protein - Homo sapiens	1.1485	0.3632	1.1653	0.0615
2.83	2.88	27.3	Q13884|SNTB1_HUMAN	Beta-1-syntrophin - Homo sapiens	1.309	0.0306	1.1361	0.3309
5.05	5.05	18.3	P02749|APOH_HUMAN	Beta-2-glycoprotein 1 precursor - Homo sapiens	0.8436	0.0078	1.2661	0.0008
4.33	4.34	47.1	Q540F8|Q540F8_HUMAN	Beta-2-microglobulin - Homo sapiens	1.1112	0.0758	1.2669	0.002
7.19	8	32.5	P16278|BGAL_HUMAN	Beta-galactosidase precursor - Homo sapiens	1.0178	0.8392	0.9321	0.3388
1.7	1.7	11.3	P15907|SIAT1_HUMAN	Beta-galactoside alpha-2,6-sialyltransferase 1 - Homo sapiens	1.0306	0.8592	0.9208	0.4457
11.31	11.31	27.3	P08236|BGLR_HUMAN	Beta-glucuronidase precursor - Homo sapiens	0.9398	0.1512	1.0024	0.9508
23.36	23.36	41.7	P07686|HEXB_HUMAN	Beta-hexosaminidase beta chain precursor - Homo sapiens	1.001	0.9799	0.876	0.014
5.32	5.35	29.2	Q53H82|LACB2_HUMAN	Beta-lactamase-like protein 2 - Homo sapiens	0.9544	0.3913	0.8023	0.0129
2.05	2.06	19.7	Q13057|COASY_HUMAN	Bifunctional coenzyme A synthase - Homo sapiens	0.5771		0.9425
10.36	10.37	51.4	P13995|MTDC_HUMAN	Bifunctional methylenetetrahydrofolate dehydrogenase/cyclohydrolase, mitochondrial precursor - Homo sapiens	0.8875	0.2	0.8765	0.0126
1.33	1.37	14.1	Q13867|BLMH_HUMAN	Bleomycin hydrolase - Homo sapiens
4.35	4.36	59.8	Q53S33|BOLA3_HUMAN	BolA-like protein 3 - Homo sapiens	0.9028	0.2258	0.8855	0.028
2	2.01	11.7	Q10589|BST2_HUMAN	Bone marrow stromal antigen 2 precursor - Homo sapiens	1.0635	0.4976	0.8773	0.4247
11.64	11.67	53.7	P80723|BASP_HUMAN	Brain acid soluble protein 1 - Homo sapiens	1.1614	0.2427	1.0635	0.6906
2.36	2.37	24.4	O95563|BR44_HUMAN	Brain protein 44 - Homo sapiens	1.0058	0.9174	0.946	0.6709
5.07	5.11	45	Q59EI3|Q59EI3_HUMAN	Branched chain keto acid dehydrogenase E1, alpha polypeptide variant (Fragment) - Homo sapiens	0.9306	0.554	0.9144	0.1062
10.63	10.65	37.2	O15382|BCAT2_HUMAN	Branched-chain-amino-acid aminotransferase, mitochondrial precursor - Homo sapiens	1.0876	0.0965	0.9617	0.3759
2.03	2.03	25.9	Q8WY22|BRI3B_HUMAN	BRI3-binding protein - Homo sapiens	0.8916	0.1005	1.1512	0.2913
2	2.01	8.9	Q96BF6|BTBDE_HUMAN	BTB/POZ domain-containing protein 14A - Homo sapiens
2.66	2.66	15.6	Q2TA85|Q2TA85_HUMAN	C10orf54 protein (Fragment) - Homo sapiens	1.2319	0.0933	0.9301	0.4729
7.07	7.1	32.7	Q6IA66|Q6IA66_HUMAN	C14orf159 protein - Homo sapiens	1.212	0.0302	1.0323	0.6062
4	4	48.7	Q96G68|Q96G68_HUMAN	C1orf151 protein (Fragment) - Homo sapiens	0.8426	0.1365	1.0432	0.5907
6.18	6.2	19.1	P21730|C5AR_HUMAN	C5a anaphylatoxin chemotactic receptor - Homo sapiens	1.0202	0.8058	1.1381	0.0835
9.24	9.46	31.2	O75844|FACE1_HUMAN	CAAX prenyl protease 1 homolog - Homo sapiens	0.9812	0.7687	0.9603	0.4664
1.68	1.68	20.9	Q99828|CIB1_HUMAN	Calcium and integrin-binding protein 1 - Homo sapiens	0.9108	0.5706	0.7731	0.0132
7.02	7.05	22.7	Q9BPX6|CBAA1_HUMAN	Calcium-binding atopy-related autoantigen 1 - Homo sapiens	0.9167	0.0445	0.9426	0.1241
27.29	27.46	51	Q9UJS0|CMC2_HUMAN	Calcium-binding mitochondrial carrier protein Aralar2 - Homo sapiens	0.9088	0.3184	0.999	0.9836
30.48	30.57	59.3	Q6NUK1|SCMC1_HUMAN	Calcium-binding mitochondrial carrier protein SCaMC-1 - Homo sapiens	0.9423	0.1335	0.9332	0.0385
4.96	5.06	19.2	Q6KCM7|SCMC2_HUMAN	Calcium-binding mitochondrial carrier protein SCaMC-2 - Homo sapiens	0.8053	0.1717	0.8197	0.0549
11.63	11.63	50.3	Q99653|CHP1_HUMAN	Calcium-binding protein p22 - Homo sapiens	0.9339	0.2022	1.013	0.7773
5.51	6.5	21.4	Q9NP80|PLPL8_HUMAN	Calcium-independent phospholipase A2-gamma - Homo sapiens	1.0027	0.9644	1.0564	0.4223
4.85	4.9	19.4	P98194|AT2C1_HUMAN	Calcium-transporting ATPase type 2C member 1 - Homo sapiens	0.9474	0.3825	0.9214	0.2564
15.64	15.64	54.4	P62158|CALM_HUMAN	Calmodulin - Homo sapiens	1.5569	0	1.0027	0.9574
37.82	37.86	47.1	P27824|CALX_HUMAN	Calnexin precursor - Homo sapiens	0.9317	0.0186	1.2407	0
33.43	33.43	53.5	Q6IAT4|Q6IAT4_HUMAN	CALR protein - Homo sapiens	0.9632	0.1353	1.1992	0
13.71	13.72	38.1	Q6IAW5|Q6IAW5_HUMAN	CALU protein - Homo sapiens	0.9636	0.4248	1.0379	0.5246
9.32	9.35	35.2	B1AK88|B1AK88_HUMAN	Capping protein (Actin filament) muscle Z-line, beta - Homo sapiens	1.0928	0.0364	1.0839	0.0968
3.66	3.7	28.5	P16152|CBR1_HUMAN	Carbonyl reductase [NADPH] 1 - Homo sapiens	0.9671	0.7695	0.9175	0.4969
2.28	2.29	28.3	Q8N4T8|CBR4_HUMAN	Carbonyl reductase 4 - Homo sapiens	0.8897	0.3745	0.9911	0.9421
2.3	2.36	18.7	O75976|CBPD_HUMAN	Carboxypeptidase D precursor - Homo sapiens	0.9311	0.5338	0.8963	0.4489
12.32	12.36	25.3	P14384|CBPM_HUMAN	Carboxypeptidase M precursor - Homo sapiens	1.1483	0	1.0704	0.0609
9.48	9.51	31.6	P43155|CACP_HUMAN	Carnitine O-acetyltransferase - Homo sapiens	1.0675	0.3242	1.0118	0.8592
34.06	34.09	47.4	P23786|CPT2_HUMAN	Carnitine O-palmitoyltransferase 2, mitochondrial precursor - Homo sapiens	0.8992	0	0.9558	0.0045
24.51	24.53	42.3	P50416|CPT1A_HUMAN	Carnitine O-palmitoyltransferase I, liver isoform - Homo sapiens	0.9716	0.5728	1.1133	0.1833
10	10.05	32.8	Q59EV6|Q59EV6_HUMAN	Carrier family 6 , member 8 variant (Fragment) - Homo sapiens	0.947	0.3274	0.905	0.0331
18.75	18.81	41	Q9H078|CLPB_HUMAN	Caseinolytic peptidase B protein homolog - Homo sapiens	0.9273	0.0252	0.885	0.0051
18.69	18.69	37.8	Q9NZK5|CECR1_HUMAN	Cat eye syndrome critical region protein 1 precursor - Homo sapiens	0.9643	0.4185	0.8865	0.0004
8.4	8.41	36.6	Q9BXW7|CECR5_HUMAN	Cat eye syndrome critical region protein 5 precursor - Homo sapiens	0.8604	0.0277	0.8869	0.03
31.3	31.35	45.7	P04040|CATA_HUMAN	Catalase - Homo sapiens	0.9088	0.0082	1.0314	0.256
9.36	9.36	45	P21964|COMT_HUMAN	Catechol O-methyltransferase - Homo sapiens	1.0253	0.599	1.1826	0.041
4.11	4.14	34.1	P49913|CAMP_HUMAN	Cathelicidin antimicrobial peptide precursor - Homo sapiens	0.9121	0.1569	0.8942	0.0956
31.53	31.53	53.7	P07858|CATB_HUMAN	Cathepsin B precursor - Homo sapiens	0.8933	0.0188	0.7913	0
28.64	28.66	47.6	P07339|CATD_HUMAN	Cathepsin D precursor - Homo sapiens	0.9051	0.0338	0.7773	0
7.56	7.58	26	Q96NY6|Q96NY6_HUMAN	Cathepsin H - Homo sapiens	1.0604	0.5506	0.9114	0.1083
9.58	9.6	27.9	P07711|CATL1_HUMAN	Cathepsin L1 precursor - Homo sapiens	1.1195	0.2147	1.0214	0.7365
8.64	8.64	32	Q9UBR2|CATZ_HUMAN	Cathepsin Z precursor - Homo sapiens	0.8728	0.003	0.8087	0
7.28	7.38	28.4	Q9BYI0|Q9BYI0_HUMAN	Cation chloride cotransporter 6 - Homo sapiens	1.0628	0.4367	0.9534	0.5021
19.24	19.27	22.8	P11717|MPRI_HUMAN	Cation-independent mannose-6-phosphate receptor precursor - Homo sapiens	0.8591	0.0007	0.7355	0
23.48	23.48	47.2	Q53XT5|Q53XT5_HUMAN	CD14 antigen - Homo sapiens	1.2113	0.0002	0.6324	0
11.46	11.54	26.4	Q13740|CD166_HUMAN	CD166 antigen precursor - Homo sapiens	1.1163	0.1113	1.2331	0.0154
1.95	1.95	15.4	Q546G0|Q546G0_HUMAN	CD33 antigen - Homo sapiens	1.417		1.009
23.53	23.53	30.2	Q9H5A7|Q9H5A7_HUMAN	CD44 molecule (Fragment) - Homo sapiens	1.3379	0	1.2909	0
2.6	2.6	22.1	Q9BRW0|Q9BRW0_HUMAN	CD58 protein - Homo sapiens	1.0742	0.1294	1.0971	0.0362
4	4	18.8	Q6FHM9|Q6FHM9_HUMAN	CD59 protein - Homo sapiens	1.0521	0.8508	1.1623	0.2103
3.31	3.32	17.1	P21926|CD9_HUMAN	CD9 antigen - Homo sapiens	1.3361	0	1.2807	0.0017
8.55	8.55	17.5	P48960|CD97_HUMAN	CD97 antigen precursor - Homo sapiens	1.1271	0.1712	0.991	0.9026
7.22	7.22	30.8	Q6ICV7|Q6ICV7_HUMAN	CD99 protein (Fragment) - Homo sapiens	1.2526	0.0368	0.8673	0.2154
5.7	6	50.9	Q9NZ45|CISD1_HUMAN	CDGSH iron sulfur domain-containing protein 1 - Homo sapiens	0.9821	0.8624	0.9162	0.4495
10.2	10.21	45.9	Q8N5K1|CISD2_HUMAN	CDGSH iron sulfur domain-containing protein 2 - Homo sapiens	1.0271	0.7661	1.1413	0.0317
1.7	1.7	7.8	Q9NUS9|Q9NUS9_HUMAN	cDNA FLJ11160 fis, clone PLACE1007014, weakly similar to 36 KD NUCLEOLAR PROTEIN HNP36 - Homo sapiens	0.8909	0.4366	0.5277	0.0199
7.53	7.54	39.3	Q96ND2|Q96ND2_HUMAN	cDNA FLJ31051 fis, clone HSYRA2000605, weakly similar to MYOSIN HEAVY CHAIN, CLONE 203 - Homo sapiens	1.0183	0.8054	1.149	0.1237
2.38	2.39	27.8	Q8NB01|Q8NB01_HUMAN	cDNA FLJ34453 fis, clone HLUNG2002429, highly similar to Homo sapiens cartilage-associated protein - Homo sapiens	1.021	0.7454	1.2298	0.2716
2.13	2.15	17.2	Q6ZUY8|Q6ZUY8_HUMAN	cDNA FLJ43203 fis, clone FEBRA2008468, highly similar to LYSOSOMAL ACID LIPASE/CHOLESTERYL ESTER HYDROLASE - Homo sapiens	0.7904	0.1952	0.8305	0.3396
1.97	4.27	35.2	Q6ZS74|Q6ZS74_HUMAN	cDNA FLJ45773 fis, clone NETRP2003448, highly similar to Ras-related protein RAL-B - Homo sapiens	1.1048	0.1647	0.9935	0.9339
26.25	26.33	33.4	A8K596|A8K596_HUMAN	cDNA FLJ75087, highly similar to Homo sapiens sarcosine dehydrogenase (SARDH), mRNA - Homo sapiens	1.062	0.1188	1.0108	0.8312
9.59	10	94.3	A8K674|A8K674_HUMAN	cDNA FLJ75516, highly similar to Xenopus tropicalis ubiquitin C, mRNA - Homo sapiens	0.9333	0.023	1.0933	0.0043
6.1	6.22	23.9	A8K693|A8K693_HUMAN	cDNA FLJ75713, highly similar to Homo sapiens kynurenine 3-monooxygenase - Homo sapiens	1.1472	0.0049	1.0985	0.3399
11.74	11.74	30.1	A8K7T4|A8K7T4_HUMAN	cDNA FLJ75774, highly similar to Homo sapiens lectin, mannose-binding 2 (LMAN2), mRNA - Homo sapiens	0.9992	0.983	1.1137	0.0002
44.43	44.57	48.3	A8K6Q8|A8K6Q8_HUMAN	cDNA FLJ75881, highly similar to Homo sapiens transferrin receptor - Homo sapiens	0.969	0.5314	0.9405	0.0098
12.96	13.44	27.1	A8K4A8|A8K4A8_HUMAN	cDNA FLJ76156, highly similar to Homo sapiens aspartyl-tRNA synthetase 2 (DARS2), mRNA - Homo sapiens	1.0316	0.4973	0.9104	0.2787
6.14	6.14	25.5	A8K335|A8K335_HUMAN	cDNA FLJ76254, highly similar to Homo sapiens gamma-glutamyl hydrolase (GGH), mRNA - Homo sapiens	1.0159	0.8265	0.9881	0.8878
9.94	9.95	25.3	A8K3S7|A8K3S7_HUMAN	cDNA FLJ76270, highly similar to Homo sapiens platelet/endothelial cell adhesion molecule - Homo sapiens	1.0962	0.1644	0.9718	0.6346
1.97	1.99	22.4	A8KAQ6|A8KAQ6_HUMAN	cDNA FLJ76490, highly similar to Homo sapiens ancient ubiquitous protein 1 (AUP1), transcript variant 2, mRNA - Homo sapiens	1.0106	0.931	1.0824	0.5082
2.78	2.91	11.9	A8K0M6|A8K0M6_HUMAN	cDNA FLJ76697 - Homo sapiens	0.8217	0.0708	0.8066	0.3545
5.46	5.53	32.8	A8K4E9|A8K4E9_HUMAN	cDNA FLJ77100 - Homo sapiens	1.0305	0.6703	1.0084	0.9168
42.45	42.46	54.9	A8K844|A8K844_HUMAN	cDNA FLJ77173, highly similar to Homo sapiens carboxylesterase 1 - Homo sapiens	0.9264	0.0396	1.1531	0.0001
2.55	2.69	13.6	A8K8K3|A8K8K3_HUMAN	cDNA FLJ77183 - Homo sapiens	1.0811	0.7217	0.8765	0.1955
3.1	3.17	26.3	A8KAJ7|A8KAJ7_HUMAN	cDNA FLJ77222, highly similar to Homo sapiens UDP-N-acetyl-alpha-D-galactosamine:polypeptide N-acetylgalactosaminyltransferase 1 - Homo sapiens	1.0605	0.6126	0.8842	0.2872
1.41	1.73	11.8	A8K6W1|A8K6W1_HUMAN	cDNA FLJ77470, highly similar to Homo sapiens egf-like module containing, mucin-like, hormone receptor-like 2 (EMR2), transcript variant 1, mRNA - Homo sapiens	0.9544	0.8436	1.0033	0.9939
10.02	10.15	43	A8K642|A8K642_HUMAN	cDNA FLJ77498, highly similar to Homo sapiens nucleobindin 2 (NUCB2), mRNA - Homo sapiens	1.1828	0.0651	1.0316	0.6793
4.19	4.21	22.3	A8K6E3|A8K6E3_HUMAN	cDNA FLJ77562, highly similar to Homo sapiens STEAP family member 3 (STEAP3), transcript variant 1, mRNA - Homo sapiens	0.8765	0.2842	0.9109	0.1644
4.65	4.67	23.7	A8K701|A8K701_HUMAN	cDNA FLJ77574, highly similar to Homo sapiens iduronidase, alpha-L-(IDUA), mRNA - Homo sapiens	0.9079	0.1353	0.857	0.0327
1.59	6.39	18.1	A8K1I1|A8K1I1_HUMAN	cDNA FLJ77650 - Homo sapiens	1.2344	0.3218	1.0473	0.8326
11.29	11.29	37.6	A8K3F6|A8K3F6_HUMAN	cDNA FLJ77654, highly similar to Homo sapiens guanine nucleotide binding protein (G protein), beta polypeptide 4 (GNB4), mRNA - Homo sapiens	1.132	0.4149	1.4549	0.1467
4.63	4.64	33.1	A8K7H3|A8K7H3_HUMAN	cDNA FLJ77670, highly similar to Homo sapiens ribosomal protein S15a (RPS15A), mRNA - Homo sapiens	0.8741	0.1606	1.2587	0.0037
5.43	5.51	24.9	A8K968|A8K968_HUMAN	cDNA FLJ77757 - Homo sapiens	2.0942	0.0071	1.7426	0.0006
30.19	30.3	41	A8K7J7|A8K7J7_HUMAN	cDNA FLJ78173, highly similar to Homo sapiens hexokinase 1 (HK1) mRNA - Homo sapiens	1.1555	0	0.9242	0.0053
104.32	104.34	69.1	A8K1V1|A8K1V1_HUMAN	cDNA FLJ78366, highly similar to Homo sapiens leucine-rich PPR-motif containing (LRPPRC), mRNA - Homo sapiens	0.9448	0.0023	0.9707	0.1204
16.16	16.19	28.4	A8K916|A8K916_HUMAN	cDNA FLJ78481, highly similar to Homo sapiens adaptor-related protein complex 2, beta 1 subunit, mRNA - Homo sapiens	1.1425	0.1626	1.0584	0.2758
2.16	2.2	23.1	A8K4W0|A8K4W0_HUMAN	cDNA FLJ78591, highly similar to Homo sapiens ribosomal protein S3A (RPS3A), mRNA - Homo sapiens	1.0996	0.2056	1.5755	0.0557
2.29	2.32	24.1	A8K088|A8K088_HUMAN	cDNA FLJ78614, highly similar to Homo sapiens eukaryotic translation initiation factor 4A, isoform 1 (EIF4A1), mRNA - Homo sapiens	1.0177		1.6558
5.23	5.23	13.7	A8K6Q6|A8K6Q6_HUMAN	cDNA FLJ78639 - Homo sapiens	0.9699	0.633	0.8727	0.7233
5.77	5.77	20.6	A8K6Q1|A8K6Q1_HUMAN	cDNA FLJ78673, highly similar to Homo sapiens NOD9 protein (NOD9), transcript variant 1, mRNA - Homo sapiens	1.198	0.0263	0.9874	0.8441
30.37	30.53	58.4	Q8NCF7|Q8NCF7_HUMAN	cDNA FLJ90278 fis, clone NT2RP1000325, highly similar to Phosphate carrier protein, mitochondrialprecursor - Homo sapiens	0.9441	0.0578	0.9501	0.0523
6.55	6.63	33.4	Q8NBT4|Q8NBT4_HUMAN	cDNA FLJ90803 fis, clone Y79AA1000270, highly similar to Vacuolar ATP synthase subunit S1 - Homo sapiens	0.8655	0.022	0.8679	0.2199
3.12	3.13	19.7	Q53HA5|Q53HA5_HUMAN	CDP-diacylglycerol--inositol 3-phosphatidyltransferase isoform 1 variant (Fragment) - Homo sapiens	0.7313	0.0002	0.8092	0.1304
4.02	7.42	23.6	P60953|CDC42_HUMAN	Cell division control protein 42 homolog precursor - Homo sapiens	1.2396	0.0011	1.2761	0.0186
4.31	4.35	35	Q08ES8|Q08ES8_HUMAN	Cell growth-inhibiting protein 34 - Homo sapiens	1.2339	0.0372	1.2606	0.0014
14.96	14.98	55.9	Q08ET0|Q08ET0_HUMAN	Cell proliferation-inducing protein 47 - Homo sapiens	0.9248	0.122	0.9898	0.7965
14.82	14.84	40.1	Q54A51|Q54A51_HUMAN	Cervical EMMPRIN - Homo sapiens	1.0182	0.639	1.082	0.0374
2.41	2.45	28.6	Q8NI60|ADCK3_HUMAN	Chaperone activity of bc1 complex-like, mitochondrial precursor - Homo sapiens	1.249	0.0361	1.0049	0.9574
1.45	1.49	20.8	Q53HU0|Q53HU0_HUMAN	Chaperonin containing TCP1, subunit 8 (Theta) variant (Fragment) - Homo sapiens	1.0795	0.7349	1.1717	0.2157
6.01	6.1	29	Q9H444|CHM4B_HUMAN	Charged multivesicular body protein 4b - Homo sapiens	0.762	0.101	0.9351	0.4864
7.55	7.56	38.2	Q9BWS9|CHID1_HUMAN	Chitinase domain-containing protein 1 precursor - Homo sapiens	0.9181	0.1791	1.0049	0.9393
4.11	5.54	26.9	P36222|CH3L1_HUMAN	Chitinase-3-like protein 1 precursor - Homo sapiens	0.8322	0.1138	0.735	0.0163
2.79	2.88	19.5	Q5VX50|Q5VX50_HUMAN	Chitobiase, di-N-acetyl- - Homo sapiens	1.0181	0.7078	0.8996	0.0503
4.06	4.08	21.6	Q9BT22|ALG1_HUMAN	Chitobiosyldiphosphodolichol beta-mannosyltransferase - Homo sapiens	1.0108	0.8805	1.045	0.4022
11.57	11.59	23.1	P51798|CLCN7_HUMAN	Chloride channel protein 7 - Homo sapiens	0.8491	0.011	0.9017	0.1301
2.03	2.06	21.6	Q5SRT3|Q5SRT3_HUMAN	Chloride intracellular channel 1 - Homo sapiens	1.1743	0.4885	1.2563	0.2191
2.03	2.06	22.5	Q9Y696|CLIC4_HUMAN	Chloride intracellular channel protein 4 - Homo sapiens	1.2126	0.3322	0.9928	0.8399
2	2.03	14.4	Q9Y6K0|CEPT1_HUMAN	Choline/ethanolaminephosphotransferase 1 - Homo sapiens	0.867	0.5107	1.2358	0.4818
5.97	5.97	44.7	Q8N0X4|CLYBL_HUMAN	Citrate lyase subunit beta-like protein, mitochondrial precursor - Homo sapiens	1.0278	0.4954	0.9397	0.2943
27.55	27.6	54.7	O75390|CISY_HUMAN	Citrate synthase, mitochondrial precursor - Homo sapiens	1.0374	0.1065	1.0223	0.3356
2	2	17.6	Q96MX0|CKLF3_HUMAN	CKLF-like MARVEL transmembrane domain-containing protein 3 - Homo sapiens	0.8981	0.4608	1.0139	0.9419
4.3	4.3	26.2	Q9NX76|CKLF6_HUMAN	CKLF-like MARVEL transmembrane domain-containing protein 6 - Homo sapiens	1.2584	0.0333	0.9416	0.5213
12.91	13.14	24	Q00610|CLH1_HUMAN	Clathrin heavy chain 1 - Homo sapiens	1.6645	0	1.8494	0
11.74	11.75	20.3	O96005|CLPT1_HUMAN	Cleft lip and palate transmembrane protein 1 - Homo sapiens	0.871	0.0566	1.0263	0.7579
2.01	2.02	19.7	Q8TDQ1|CLM1_HUMAN	CMRF35-like molecule 1 precursor - Homo sapiens
4.81	4.81	36.6	Q14019|COTL1_HUMAN	Coactosin-like protein - Homo sapiens	2.2473	0.0015	1.9412	0.0001
11.06	11.1	46	Q96EY8|MMAB_HUMAN	Cob(I)yrinic acid a,c-diamide adenosyltransferase, mitochondrial precursor - Homo sapiens	1.113	0.1536	0.9558	0.5896
5.46	5.48	30.2	Q8IWL3|HSC20_HUMAN	Co-chaperone protein HscB, mitochondrial precursor - Homo sapiens	1.0299	0.8292	0.9478	0.4777
2.05	2.15	16.8	Q5T061|Q5T061_HUMAN	Coenzyme Q3 homolog, methyltransferase - Homo sapiens			1.2263
5.19	5.19	42.4	Q9BTT7|Q9BTT7_HUMAN	Coenzyme Q7 homolog, ubiquinone - Homo sapiens	0.9167	0.4076	0.7986	0.0358
9.02	9.09	53.6	P23528|COF1_HUMAN	Cofilin-1 - Homo sapiens	2.1051	0	1.6361	0
9.79	9.84	37.9	Q8NE86|C109A_HUMAN	Coiled-coil domain-containing protein 109A - Homo sapiens	0.9237	0.3379	0.9814	0.5591
1.83	1.84	12.8	Q9NWR8|C109B_HUMAN	Coiled-coil domain-containing protein 109B - Homo sapiens	1.0263	0.84	0.8338	0.6383
3.98	3.99	36.7	Q9BSH4|CCD44_HUMAN	Coiled-coil domain-containing protein 44 - Homo sapiens	1.0266	0.5921	1.0357	0.6759
7.14	7.14	15.7	Q96A33|CCD47_HUMAN	Coiled-coil domain-containing protein 47 precursor - Homo sapiens	0.7531	0.0066	0.9943	0.9529
10.84	10.9	38.4	Q96ER9|CCD51_HUMAN	Coiled-coil domain-containing protein 51 - Homo sapiens	0.9812	0.7386	0.8636	0.0467
8.13	8.13	66	Q9Y2R0|CCD56_HUMAN	Coiled-coil domain-containing protein 56 - Homo sapiens	0.928	0.168	0.9948	0.9508
5.29	5.29	48.6	Q4VC31|CCD58_HUMAN	Coiled-coil domain-containing protein 58 - Homo sapiens	0.8706	0.1365	0.8714	0.0341
1.79	1.81	33.7	Q96AQ8|CC90A_HUMAN	Coiled-coil domain-containing protein 90A, mitochondrial precursor - Homo sapiens	1.1718	0.2758	1.1396	0.6558
3.87	3.88	43.7	Q9GZT6|CC90B_HUMAN	Coiled-coil domain-containing protein 90B, mitochondrial precursor - Homo sapiens	0.9361	0.4902	0.8435	0.07
18.2	18.27	62.1	Q9NX63|CHCH3_HUMAN	Coiled-coil-helix-coiled-coil-helix domain-containing protein 3, mitochondrial precursor - Homo sapiens	1.0115	0.7484	1.0753	0.025
2.12	2.12	30	Q9BSY4|CHCH5_HUMAN	Coiled-coil-helix-coiled-coil-helix domain-containing protein 5 - Homo sapiens
5.06	5.08	35.7	Q9BRQ6|CHCH6_HUMAN	Coiled-coil-helix-coiled-coil-helix domain-containing protein 6 - Homo sapiens	0.9137	0.5749	1.1426	0.3577
2	2	17.2	Q9NYJ1|CHCH8_HUMAN	Coiled-coil-helix-coiled-coil-helix domain-containing protein 8 - Homo sapiens
1.35	1.48	37	P12107|COBA1_HUMAN	Collagen alpha-1(XI) chain precursor - Homo sapiens	1.0689	0.3654	1.0747	0.4493
1.56	1.65	27.4	Q5KU26|COL12_HUMAN	Collectin-12 - Homo sapiens	0.8843	0.4102	0.7464	0.2447
16.32	16.35	46.5	Q07021|C1QBP_HUMAN	Complement component 1 Q subcomponent-binding protein, mitochondrial precursor - Homo sapiens	0.9879	0.9149	1.0012	0.9928
2.14	2.15	24.5	Q9Y375|CIA30_HUMAN	Complex I intermediate-associated protein 30, mitochondrial precursor - Homo sapiens	1.0214	0.8159	0.9865	0.7969
2	6.06	39	Q9BWC7|Q9BWC7_HUMAN	COMT protein - Homo sapiens	0.9565	0.5651	1.0909	0.5118
2.07	2.09	20.7	O75131|CPNE3_HUMAN	Copine-3 - Homo sapiens	1.2321	0.3454	1.0658	0.3696
10.41	10.42	38.3	Q53F08|Q53F08_HUMAN	Coproporphyrinogen oxidase variant (Fragment) - Homo sapiens	0.9206	0.0652	0.761	0
5.85	5.91	44.4	O75367|H2AY_HUMAN	Core histone macro-H2A.1 - Homo sapiens	0.5143	0	0.6402	0
4.46	4.5	28.2	P31146|COR1A_HUMAN	Coronin-1A - Homo sapiens	1.3975	0.2867	1.1649	0.5324
9.33	9.36	30.6	A7MAP1|A7MAP1_HUMAN	Coronin-1C_i3 protein - Homo sapiens	1.2929	0.008	0.9436	0.2506
5.27	5.33	34.6	P28845|DHI1_HUMAN	Corticosteroid 11-beta-dehydrogenase isozyme 1 - Homo sapiens	0.8394	0.1361	0.9637	0.7549
4.99	5.01	49.1	Q6FGA0|Q6FGA0_HUMAN	COX7A2L protein - Homo sapiens	0.9022	0.1042	0.9025	0.0797
5.8	5.91	24	Q59FD2|Q59FD2_HUMAN	CTAGE family, member 5 isoform 1 variant (Fragment) - Homo sapiens	1.0374	0.8144	1.0546	0.6813
6.16	6.16	23.1	Q6IBJ6|Q6IBJ6_HUMAN	CTSG protein - Homo sapiens	0.9762	0.7966	1.186	0.0742
11.87	12.14	42	Q6FHS5|Q6FHS5_HUMAN	CTSS protein - Homo sapiens	0.9695	0.3314	0.8157	0
3.3	3.31	19.7	Q9NY25|CLC5A_HUMAN	C-type lectin domain family 5 member A - Homo sapiens	1.3266	0.0695	1.0795	0.2456
2.22	2.22	51	Q76LA1|Q76LA1_HUMAN	Cystatin B - Homo sapiens	1.1009	0.1037	1.25	0.0064
2.09	2.1	40.4	P01034|CYTC_HUMAN	Cystatin-C precursor - Homo sapiens	1.0772		0.8919
13.06	13.07	48.4	Q9Y697|NFS1_HUMAN	Cysteine desulfurase, mitochondrial precursor - Homo sapiens	1.0839	0.2925	1.0218	0.737
22.27	22.29	35.6	P04839|CY24B_HUMAN	Cytochrome b-245 heavy chain - Homo sapiens	1.0357	0.3395	1.1379	0.0001
10.89	10.89	52.3	P13498|CY24A_HUMAN	Cytochrome b-245 light chain - Homo sapiens	1.1166	0.0264	0.906	0.0544
6.08	6.1	46.2	Q59F44|Q59F44_HUMAN	Cytochrome b-5 isoform 1 variant (Fragment) - Homo sapiens	1.0641	0.7237	1.0955	0.1308
2.35	2.35	10.4	O14569|C56D2_HUMAN	Cytochrome b561 domain-containing protein 2 - Homo sapiens	0.9081	0.649	1.0651	0.5323
31.05	31.05	59.2	P31930|QCR1_HUMAN	Cytochrome b-c1 complex subunit 1, mitochondrial precursor - Homo sapiens	0.9291	0.0385	0.921	0.0389
42.71	42.71	69.1	P22695|QCR2_HUMAN	Cytochrome b-c1 complex subunit 2, mitochondrial precursor - Homo sapiens	0.9648	0.2051	0.9796	0.4563
7.25	7.34	53.8	P07919|QCR6_HUMAN	Cytochrome b-c1 complex subunit 6, mitochondrial precursor - Homo sapiens	1.1703	0.0004	1.1587	0.0018
4.61	4.61	58.5	O14949|QCR8_HUMAN	Cytochrome b-c1 complex subunit 8 - Homo sapiens	0.9441	0.1062	0.8437	0.0009
6.26	6.26	50.8	Q9UDW1|QCR9_HUMAN	Cytochrome b-c1 complex subunit 9 - Homo sapiens	0.9707	0.816	0.9482	0.628
16.02	16.03	62.8	P47985|UCRI_HUMAN	Cytochrome b-c1 complex subunit Rieske, mitochondrial precursor - Homo sapiens	0.9733	0.5082	0.9625	0.5419
14.95	15.15	65.7	P99999|CYC_HUMAN	Cytochrome c - Homo sapiens	0.7927	0	0.8843	0.0002
5.9	5.9	21.7	Q7KZN9|COX15_HUMAN	Cytochrome c oxidase assembly protein COX15 homolog - Homo sapiens	0.948	0.4234	0.869	0.0405
2.1	2.11	40	Q49B96|COX19_HUMAN	Cytochrome c oxidase assembly protein COX19 - Homo sapiens	1.3395		0.8205
3.28	3.28	55.6	Q14061|COX17_HUMAN	Cytochrome c oxidase copper chaperone - Homo sapiens	1.0367	0.6769	0.9009	0.1888
6.4	6.41	45.9	P12074|CX6A1_HUMAN	Cytochrome c oxidase polypeptide VIa-liver, mitochondrial precursor - Homo sapiens
6.82	6.82	57.3	P09669|COX6C_HUMAN	Cytochrome c oxidase polypeptide VIc precursor - Homo sapiens	1.0806	0.0052	1.0742	0.0038
8.48	8.48	41	Q4GW12|Q4GW12_HUMAN	Cytochrome c oxidase subunit 2 - Homo sapiens	0.9757	0.4304	0.9863	0.6305
2.51	2.51	47.6	P15954|COX7C_HUMAN	Cytochrome c oxidase subunit 7C, mitochondrial precursor - Homo sapiens	1.1161	0.1184	1.1411	0.0004
11.22	11.22	56.2	Q6P666|Q6P666_HUMAN	Cytochrome c oxidase subunit IV isoform 1 - Homo sapiens	1.044	0.1831	1.0289	0.4435
20.89	20.95	73.3	Q8TB65|Q8TB65_HUMAN	Cytochrome c oxidase subunit Va - Homo sapiens	0.9942	0.8869	1.0471	0.1892
21.3	21.3	72.9	Q53YB7|Q53YB7_HUMAN	Cytochrome c oxidase subunit Vb - Homo sapiens	0.9798	0.5409	0.9868	0.7074
4.77	4.77	41.9	P14854|CX6B1_HUMAN	Cytochrome c oxidase subunit VIb isoform 1 - Homo sapiens	0.9822	0.6615	1.0374	0.2697
5.52	5.53	33.7	Q496I0|Q496I0_HUMAN	Cytochrome c oxidase subunit VIIa polypeptide 2 - Homo sapiens	0.8775	0.4495	0.7947	0.0017
2	2	30.4	Q53XN1|Q53XN1_HUMAN	Cytochrome c oxidase subunit VIII - Homo sapiens	0.7796	0.0059	0.9505	0.4556
5.98	5.98	34.3	P53701|CCHL_HUMAN	Cytochrome c-type heme lyase - Homo sapiens	0.9389	0.3915	1.0393	0.5917
3.75	3.81	16	Q6UW02|CP20A_HUMAN	Cytochrome P450 20A1 - Homo sapiens	0.9954	0.9455	1.0752	0.3582
30.88	30.93	59.5	Q02318|CP27A_HUMAN	Cytochrome P450 27, mitochondrial precursor - Homo sapiens	0.9753	0.3088	0.9085	0.0013
9.54	9.56	26.6	Q96SQ9|CP2S1_HUMAN	Cytochrome P450 2S1 - Homo sapiens	0.8463	0.1385	0.9877	0.8352
3.27	3.3	21.2	Q5TZW8|Q5TZW8_HUMAN	Cytochrome P450, family 1, subfamily B, polypeptide 1 - Homo sapiens	0.872		0.4345
2.36	2.58	15	Q7L576|CYFP1_HUMAN	Cytoplasmic FMR1-interacting protein 1 - Homo sapiens	1.1397	0.0993	1.3633	0.0087
49.89	50.29	72.6	Q07065|CKAP4_HUMAN	Cytoskeleton-associated protein 4 - Homo sapiens	0.9764	0.2384	1.145	0
17.38	17.43	38.5	P28838|AMPL_HUMAN	Cytosol aminopeptidase - Homo sapiens	1.0117	0.8148	1.0662	0.2395
13.47	13.49	30.3	Q02338|BDH_HUMAN	D-beta-hydroxybutyrate dehydrogenase, mitochondrial precursor - Homo sapiens	0.987	0.7318	1.0175	0.5905
2.45	2.73	21.3	Q6IC98|DEAIN_HUMAN	Death-inducing protein - Homo sapiens
2.23	2.39	15.6	Q92608|DOCK2_HUMAN	Dedicator of cytokinesis protein 2 - Homo sapiens	1.0473	0.652	1.0364	0.8007
13.25	13.41	26.3	Q8NF50|DOCK8_HUMAN	Dedicator of cytokinesis protein 8 - Homo sapiens	0.8341	0.0004	0.9902	0.8412
2.11	2.12	19.8	Q96LJ7|DHRS1_HUMAN	Dehydrogenase/reductase SDR family member 1 - Homo sapiens	1.2049	0.0361	1.0482	0.2282
9.76	9.77	46.9	Q9BTZ2|DHRS4_HUMAN	Dehydrogenase/reductase SDR family member 4 - Homo sapiens	0.9005	0.0416	0.8977	0.0686
15.03	15.16	38.1	Q9Y394|DHRS7_HUMAN	Dehydrogenase/reductase SDR family member 7 precursor - Homo sapiens	0.8885	0.0033	1.0306	0.4125
8.43	8.43	38.8	Q6IAN0|DRS7B_HUMAN	Dehydrogenase/reductase SDR family member 7B - Homo sapiens	0.8661	0.1605	0.9351	0.6681
5.64	5.64	26	Q9BPW9|DHRS9_HUMAN	Dehydrogenase/reductase SDR family member 9 precursor - Homo sapiens	0.8477	0.1557	1.0586	0.7803
24.52	24.53	64.3	Q13011|ECH1_HUMAN	Delta(3,5)-Delta(2,4)-dienoyl-CoA isomerase, mitochondrial precursor - Homo sapiens	0.9633	0.2194	0.8667	0
2.25	2.25	25	O00115|DNS2A_HUMAN	Deoxyribonuclease-2-alpha precursor - Homo sapiens	1.0328	0.6129	0.7891	0.0011
5.15	5.16	48	P33316|DUT_HUMAN	Deoxyuridine 5'-triphosphate nucleotidohydrolase, mitochondrial precursor - Homo sapiens	1.0411	0.8308	0.9021	0.4654
14.6	14.62	39.3	Q9NR28|DBLOH_HUMAN	Diablo homolog, mitochondrial precursor - Homo sapiens	0.9026	0.0132	0.8295	0.0038
28.67	28.67	57.5	Q53EP3|Q53EP3_HUMAN	Dihydrolipoamide S-acetyltransferase (E2 component of pyruvate dehydrogenase complex) variant (Fragment) - Homo sapiens	1.0218	0.6462	1.0809	0.0539
25.54	25.63	43.4	P09622|DLDH_HUMAN	Dihydrolipoyl dehydrogenase, mitochondrial precursor - Homo sapiens	1.0125	0.633	0.954	0.1323
6.39	6.45	23.8	Q02127|PYRD_HUMAN	Dihydroorotate dehydrogenase, mitochondrial precursor - Homo sapiens	0.9032	0.1958	0.8378	0.0008
3.07	3.17	28.3	P09417|DHPR_HUMAN	Dihydropteridine reductase - Homo sapiens	1.0909	0.1699	1.0654	0.803
3.51	3.55	16.6	Q86U75|Q86U75_HUMAN	Dihydropyrimidinase-like 2 - Homo sapiens	0.876	0.1429	1.235	0.0025
9.11	9.69	25.1	P53634|CATC_HUMAN	Dipeptidyl-peptidase 1 precursor - Homo sapiens	0.8225	0.0005	0.9245	0.1406
5.12	5.14	32.3	Q9UHL4|DPP2_HUMAN	Dipeptidyl-peptidase 2 precursor - Homo sapiens	1.1858	0.1338	1.2149	0.1853
5.28	5.31	20.6	P98082|DAB2_HUMAN	Disabled homolog 2 - Homo sapiens	1.4041	0.011	0.8235	0.2375
2	2	10.3	Q96SL1|DIRC2_HUMAN	Disrupted in renal carcinoma protein 2 - Homo sapiens			0.9681
8.58	8.82	26.3	O00411|RPOM_HUMAN	DNA-directed RNA polymerase, mitochondrial precursor - Homo sapiens	0.9429	0.3368	0.9241	0.3117
2.09	2.15	27	Q5T7Q0|Q5T7Q0_HUMAN	DnaJ (Hsp40) homolog, subfamily A, member 1 - Homo sapiens	1.0456	0.6667	1.117	0.4378
9.21	9.42	20.5	Q3L0T1|Q3L0T1_HUMAN	DnaJ domain-containing protein RME-8 - Homo sapiens	0.8975	0.1603	0.9775	0.6157
5.78	5.79	26.7	Q96EY1|DNJA3_HUMAN	DnaJ homolog subfamily A member 3, mitochondrial precursor - Homo sapiens	1.1967	0.0417	1.124	0.1668
12.84	12.87	43.9	Q9UBS4|DJB11_HUMAN	DnaJ homolog subfamily B member 11 precursor - Homo sapiens	0.9976	0.9649	1.1464	0.0128
1.93	1.94	12.3	Q9NXW2|DJB12_HUMAN	DnaJ homolog subfamily B member 12 - Homo sapiens	0.7835		1.2766	0.6446
11.23	11.29	23.1	Q8IXB1|DJC10_HUMAN	DnaJ homolog subfamily C member 10 precursor - Homo sapiens	0.9806	0.7056	1.0637	0.1644
9.62	9.64	29.3	Q9NVH1|DJC11_HUMAN	DnaJ homolog subfamily C member 11 - Homo sapiens	1.0439	0.4516	1.0578	0.2692
13.39	13.73	39.1	Q13217|DNJC3_HUMAN	DnaJ homolog subfamily C member 3 precursor - Homo sapiens	0.9827	0.4686	1.0726	0.0447
5.81	5.87	23.7	Q9H3Z4|DNJC5_HUMAN	DnaJ homolog subfamily C member 5 - Homo sapiens	0.9819	0.7901	0.9807	0.7031
2.67	2.67	34.8	Q5SXM8|DNLZ_HUMAN	DNL-type zinc finger protein - Homo sapiens	1.0155	0.9389	0.9538	0.7796
13.21	13.33	34.2	Q5VWA5|Q5VWA5_HUMAN	Dolichyl-diphosphooligosaccharide-protein glycosyltransferase - Homo sapiens	0.9811	0.7531	1.0743	0.6331
20.88	20.92	39.9	P04844|RPN2_HUMAN	Dolichyl-diphosphooligosaccharide--protein glycosyltransferase subunit 2 precursor - Homo sapiens	0.9578	0.2597	1.1161	0.0033
5.57	5.57	30.1	P61803|DAD1_HUMAN	Dolichyl-diphosphooligosaccharide--protein glycosyltransferase subunit DAD1 - Homo sapiens	0.824	0.0461	0.9578	0.3518
15.24	15.26	25.7	P46977|STT3A_HUMAN	Dolichyl-diphosphooligosaccharide--protein glycosyltransferase subunit STT3A - Homo sapiens	0.8818	0.0063	1.0546	0.1206
11.06	13.45	20.9	Q8TCJ2|STT3B_HUMAN	Dolichyl-diphosphooligosaccharide--protein glycosyltransferase subunit STT3B - Homo sapiens	0.8601	0.0012	1.2296	0.0002
5.26	5.29	29.6	Q9Y673|ALG5_HUMAN	Dolichyl-phosphate beta-glucosyltransferase - Homo sapiens	0.8732	0.0126	1.0995	0.1812
4.85	4.89	45.6	Q5QPK0|Q5QPK0_HUMAN	Dolichyl-phosphate mannosyltransferase polypeptide 1, catalytic subunit (Fragment) - Homo sapiens	1.0445	0.433	1.142	0.0377
4.01	4.03	36.1	Q5SR62|Q5SR62_HUMAN	Dolichyl-phosphate mannosyltransferase polypeptide 3 - Homo sapiens	1.012	0.8469	0.9556	0.6166
2.04	2.14	20.7	Q9UJU6|DBNL_HUMAN	Drebrin-like protein - Homo sapiens
4.52	4.53	41	Q6FGU2|Q6FGU2_HUMAN	DTYMK protein (Fragment) - Homo sapiens	1.1129	0.0401	1.0869	0.2056
34.74	34.87	45.3	O60313|OPA1_HUMAN	Dynamin-like 120 kDa protein, mitochondrial precursor - Homo sapiens	1.0164	0.6578	0.9818	0.7511
10.12	12.05	21.5	Q0H395|Q0H395_HUMAN	Dysferlin_v1 - Homo sapiens	0.9534	0.4333	0.9819	0.8181
7.51	7.64	49.4	Q96A26|E2IG5_HUMAN	E2-induced gene 5 protein - Homo sapiens	0.9718	0.5479	1.0025	0.9549
2.58	2.67	19.8	Q86TM6|SYVN1_HUMAN	E3 ubiquitin-protein ligase synoviolin precursor - Homo sapiens	0.9499	0.6683	1.1092	0.2734
4.43	4.51	36.1	Q86YH3|Q86YH3_HUMAN	EARS2 protein - Homo sapiens	0.9519	0.6712	0.9084	0.3337
6.55	6.56	20.3	Q5T561|Q5T561_HUMAN	Ectonucleoside triphosphate diphosphohydrolase 1 - Homo sapiens	1.0018	0.9743	1.1215	0.1465
5.58	5.68	43.8	Q96C19|EFHD2_HUMAN	EF-hand domain-containing protein D2 - Homo sapiens	1.0828	0.3115	1.2011	0.0159
2.27	2.3	21.5	Q8N3D4|EH1L1_HUMAN	EH domain-binding protein 1-like protein 1 - Homo sapiens	1.0089	0.9035	1.0624	0.7287
25.51	25.52	57.3	P38117|ETFB_HUMAN	Electron transfer flavoprotein subunit beta - Homo sapiens	0.9519	0.0676	0.9479	0.0466
15.47	15.5	32.6	Q547S8|Q547S8_HUMAN	Electron transfer flavoprotein ubiquinone oxidoreductase - Homo sapiens	1.0105	0.8114	0.9623	0.5291
29.21	29.22	76.9	Q53XN3|Q53XN3_HUMAN	Electron-transfer-flavoprotein, alpha polypeptide - Homo sapiens	1.0118	0.7856	0.8903	0.0008
4.45	4.46	21.8	Q8IZ81|ELMD2_HUMAN	ELMO domain-containing protein 2 - Homo sapiens	0.9584	0.5513	1.1346	0.3077
8.87	8.92	38.7	Q53HQ7|Q53HQ7_HUMAN	Elongation factor 1-alpha (Fragment) - Homo sapiens	1.4916	0	2.8314	0
4.18	4.21	19.8	P13639|EF2_HUMAN	Elongation factor 2 - Homo sapiens	1.3891	0.055	1.5455	0.0046
29.17	29.18	41.4	Q96RP9|EFG1_HUMAN	Elongation factor G 1, mitochondrial precursor - Homo sapiens	0.9698	0.2896	0.9674	0.1774
2.38	2.93	16.2	A0AR28|A0AR28_HUMAN	Elongation factor G isoform - Homo sapiens	0.9413	0.5162	1.0512	0.7198
10.3	10.3	45.5	P43897|EFTS_HUMAN	Elongation factor Ts, mitochondrial precursor - Homo sapiens	0.9872	0.8078	0.9505	0.4423
59	59	74.1	P49411|EFTU_HUMAN	Elongation factor Tu, mitochondrial precursor - Homo sapiens	1.0478	0.0594	0.9298	0.0034
2	2.01	11.8	Q9BW60|ELOV1_HUMAN	Elongation of very long chain fatty acids protein 1 - Homo sapiens	0.8148		0.5798
2	2.01	8	Q9NYP7|ELOV5_HUMAN	Elongation of very long chain fatty acids protein 5 - Homo sapiens	0.858		0.6785
2.01	2.02	10.1	Q9UI08|EVL_HUMAN	Ena/VASP-like protein - Homo sapiens	0.9801		1.1028
2.11	2.21	17.8	Q5T9C0|Q5T9C0_HUMAN	Endoglin - Homo sapiens	0.8879	0.4904	0.8015	0.219
18.68	18.8	31.8	Q9NZ08|ERAP1_HUMAN	Endoplasmic reticulum aminopeptidase 1 - Homo sapiens	1.0473	0.3431	1.1266	0.0019
10.39	10.95	21.9	Q6P179|ERAP2_HUMAN	Endoplasmic reticulum aminopeptidase 2 - Homo sapiens	0.9851	0.8027	1.0551	0.2977
9.88	9.94	21.8	Q7Z2K6|ERMP1_HUMAN	Endoplasmic reticulum metallopeptidase 1 - Homo sapiens	1.0509	0.5861	0.9841	0.8618
21.49	21.55	76.6	P30040|ERP29_HUMAN	Endoplasmic reticulum protein ERp29 precursor - Homo sapiens	1.0058	0.8587	1.1135	0.0016
2.59	2.65	13.1	Q969X5|ERGI1_HUMAN	Endoplasmic reticulum-Golgi intermediate compartment protein 1 - Homo sapiens	1.1817	0.265	1.2286	0.1405
3.53	3.55	27.7	Q9Y282|ERGI3_HUMAN	Endoplasmic reticulum-Golgi intermediate compartment protein 3 - Homo sapiens	1.1337	0.1705	1.2453	0.0297
6.24	6.28	34.6	Q53FT9|Q53FT9_HUMAN	Enolase (Fragment) - Homo sapiens	1.525	0	1.583	0
1.38	1.39	39.9	Q96DC8|Q96DC8_HUMAN	Enoyl Coenzyme A hydratase domain containing 3 - Homo sapiens	0.685		0.8754
27.12	27.12	72.1	P30084|ECHM_HUMAN	Enoyl-CoA hydratase, mitochondrial precursor - Homo sapiens	1.0526	0.1826	1.0449	0.13
2.5	2.59	25	Q58EZ5|Q58EZ5_HUMAN	Enoyl-Coenzyme A, hydratase/3-hydroxyacyl Coenzyme A dehydrogenase - Homo sapiens	0.9662	0.5906	1.1162	0.3461
2	2	14.4	P12724|ECP_HUMAN	Eosinophil cationic protein precursor - Homo sapiens
5.88	5.89	24.4	Q6FGZ3|Q6FGZ3_HUMAN	EPHX1 protein (Fragment) - Homo sapiens	0.9278	0.3377	1.1791	0.0063
1.48	2.14	18.6	Q9UBC2|EP15R_HUMAN	Epidermal growth factor receptor substrate 15-like 1 - Homo sapiens	1.0996	0.8768	0.922	0.8544
7.86	7.86	40.4	P61916|NPC2_HUMAN	Epididymal secretory protein E1 precursor - Homo sapiens	0.9309	0.1568	0.9528	0.1608
4.74	7.22	31.6	B0QZ42|B0QZ42_HUMAN	ER lipid raft associated 1 - Homo sapiens	0.9505	0.5429	1.0135	0.8313
2.03	2.05	17.2	Q6IPC5|Q6IPC5_HUMAN	ER lumen protein retaining receptor - Homo sapiens	1.0509	0.3357	0.6381	0.1214
10.44	10.45	33.6	O94905|ERLN2_HUMAN	Erlin-2 - Homo sapiens	0.9524	0.2355	1.1613	0.0033
6.73	6.74	41	P27105|STOM_HUMAN	Erythrocyte band 7 integral membrane protein - Homo sapiens	0.9129	0.3424	0.6634	0.0035
2.18	3.02	20.1	Q5T4F0|Q5T4F0_HUMAN	Erythrocyte membrane protein band 4.1-like 2 - Homo sapiens	1.0179	0.9468	1.2177	0.5236
12.09	12.1	50.7	P30042|ES1_HUMAN	ES1 protein homolog, mitochondrial precursor - Homo sapiens	0.9307	0.0732	0.8942	0.0708
6.26	6.29	41.3	Q8NBQ5|DHB11_HUMAN	Estradiol 17-beta-dehydrogenase 11 precursor - Homo sapiens	0.9992	0.9872	1.1179	0.0526
13.48	13.49	40.1	Q53GQ0|DHB12_HUMAN	Estradiol 17-beta-dehydrogenase 12 - Homo sapiens	0.9124	0.0914	1.0983	0.0856
3.02	3.03	37.9	Q92506|DHB8_HUMAN	Estradiol 17-beta-dehydrogenase 8 - Homo sapiens	0.9245	0.4921	1.0026	0.9881
20.04	20.04	58.3	O95571|ETHE1_HUMAN	ETHE1 protein, mitochondrial precursor - Homo sapiens	0.9955	0.9356	0.9104	0.0941
2.05	2.06	14.2	Q53YD7|Q53YD7_HUMAN	Eukaryotic translation elongation factor 1 gamma - Homo sapiens
13.66	13.66	39.7	Q9BQ95|ECSIT_HUMAN	Evolutionarily conserved signaling intermediate in Toll pathway, mitochondrial precursor - Homo sapiens	0.9257	0.2175	0.9312	0.293
26.15	26.16	39.1	Q9BSJ8|ESYT1_HUMAN	Extended-synaptotagmin-1 - Homo sapiens	1.0252	0.6148	1.196	0.0006
1.86	9.27	34.1	Q6NUR7|Q6NUR7_HUMAN	Ezrin - Homo sapiens	1.6676	0.0054	1.4778	0.0059
4.01	4.03	24.1	P52907|CAZA1_HUMAN	F-actin-capping protein subunit alpha-1 - Homo sapiens	0.9624	0.7476	0.9603	0.1136
7.36	7.38	30.7	Q96CU9|FXRD1_HUMAN	FAD-dependent oxidoreductase domain-containing protein 1 - Homo sapiens	1.0311	0.5409	0.9541	0.5536
1.31	1.31	12.9	Q96G29|Q96G29_HUMAN	Farnesyl diphosphate synthase - Homo sapiens	1.0688		0.9726
1.87	2.01	18.7	Q9NYY8|FAKD2_HUMAN	FAST kinase domain-containing protein 2 - Homo sapiens	1.0494	0.3625	1.055	0.8032
3.72	3.76	13.4	Q7L8L6|FAKD5_HUMAN	FAST kinase domain-containing protein 5 - Homo sapiens	0.986	0.8708	0.9767	0.8368
2.32	2.4	31.1	Q01469|FABP5_HUMAN	Fatty acid-binding protein, epidermal - Homo sapiens	1.5491	0.0526	1.5157	0.0236
6.53	6.54	24.9	Q8WVX9|FACR1_HUMAN	Fatty acyl-CoA reductase 1 - Homo sapiens	0.9706	0.7462	1.0752	0.4669
1.71	1.72	10.2	Q5QNW7|Q5QNW7_HUMAN	Fc of IgG, high affinity Ia, receptor - Homo sapiens
2.03	2.03	8.5	Q8WW64|Q8WW64_HUMAN	Fc of IgG, low affinity IIa, receptor - Homo sapiens	1.0194	0.8223	0.924	0.2155
2.85	2.94	19.2	Q6IAX1|Q6IAX1_HUMAN	FDFT1 protein - Homo sapiens	0.8814	0.3767	0.9781	0.8834
7.14	7.16	19	Q86UX7|URP2_HUMAN	Fermitin family homolog 3 - Homo sapiens	1.1357	0.2802	1.6911	0.005
20.23	20.24	55.2	Q6GSK2|Q6GSK2_HUMAN	Ferredoxin reductase - Homo sapiens	0.9564	0.2313	0.947	0.2163
3.79	3.79	36.1	Q6NZ44|Q6NZ44_HUMAN	Ferritin - Homo sapiens	0.8221	0.1785	0.6326	0.0066
4.42	4.76	40.6	Q96CU0|Q96CU0_HUMAN	Ferritin, light polypeptide - Homo sapiens	1.0779	0.0867	0.9301	0.2011
12.31	12.31	41.6	Q7KZA3|Q7KZA3_HUMAN	Ferrochelatase - Homo sapiens	0.9977	0.9489	0.9983	0.968
2.61	2.63	21.2	Q53GD2|Q53GD2_HUMAN	Fibrinogen-like 2 variant (Fragment) - Homo sapiens	0.9218	0.6463	0.8907	0.4615
12.79	12.79	41.1	Q5VYV5|Q5VYV5_HUMAN	Ficolin (Collagen/fibrinogen domain containing) 1 - Homo sapiens	1.0034	0.9539	0.9863	0.7908
65.2	65.22	40.9	Q5HY55|Q5HY55_HUMAN	Filamin A, alpha - Homo sapiens	1.5166	0	1.5141	0
5.85	7.91	23.1	Q6ZNI9|Q6ZNI9_HUMAN	FLJ00395 protein (Fragment) - Homo sapiens	1.1327	0.1796	1.122	0.2828
10.47	10.51	38.8	Q6FG43|Q6FG43_HUMAN	FLOT2 protein - Homo sapiens	1.1964	0.0004	1.1941	0.0285
8.29	8.34	45.4	Q5ST80|Q5ST80_HUMAN	Flotillin 1 - Homo sapiens	1.0892	0.0358	1.1094	0.2317
2.8	3.14	17.5	O95466|FMNL_HUMAN	Formin-like protein 1 - Homo sapiens	1.0374	0.8077	1.0695	0.6763
11.39	11.66	43.8	Q16595|FRDA_HUMAN	Frataxin, mitochondrial precursor - Homo sapiens	1.0078	0.9298	0.9445	0.5649
10.35	10.35	45.3	Q6FI10|Q6FI10_HUMAN	Fructose-bisphosphate aldolase - Homo sapiens	1.4958	0	1.8345	0
2.79	2.79	21.7	Q86SZ6|Q86SZ6_HUMAN	Full-length cDNA clone CS0DJ012YD11 of T cells (Jurkat cell line) of Homo sapiens - Homo sapiens	0.9701	0.6232	0.9138	0.4331
2.79	2.82	25.4	Q53XC0|Q53XC0_HUMAN	Full-length cDNA clone CS0DL010YH08 of B cells (Ramos cell line) of Homo sapiens - Homo sapiens	1.3456	0.2771	1.2449	0.599
2.17	2.2	16.3	Q53XB6|Q53XB6_HUMAN	Full-length cDNA clone CS0DM004YH09 of Fetal liver of Homo sapiens - Homo sapiens	1.2335	0.0027	1.6317	0.029
36.59	36.59	66.1	P07954|FUMH_HUMAN	Fumarate hydratase, mitochondrial precursor - Homo sapiens	0.9523	0.0559	0.9296	0.0027
8.57	8.58	51.3	Q6P587|FAHD1_HUMAN	Fumarylacetoacetate hydrolase domain-containing protein 1 - Homo sapiens	0.9408	0.6648	0.8994	0.6933
7.16	7.17	23.6	Q96GK7|FAH2A_HUMAN	Fumarylacetoacetate hydrolase domain-containing protein 2A - Homo sapiens	0.9917	0.9633	1.1184	0.247
7.18	7.2	46.8	Q5HYP8|Q5HYP8_HUMAN	FUN14 domain containing 2 (Fragment) - Homo sapiens	1.0708	0.2936	1.0945	0.2229
2.18	2.31	35.7	Q8TBR3|Q8TBR3_HUMAN	Fusion - Homo sapiens	0.8525	0.1023	0.9376	0.7802
2	2.05	9.7	P54803|GALC_HUMAN	Galactocerebrosidase precursor - Homo sapiens	0.9104		1.107
13.25	13.25	65.2	P09382|LEG1_HUMAN	Galectin-1 - Homo sapiens	1.9585	0	2.7837	0
15.29	15.29	46.2	O00182|LEG9_HUMAN	Galectin-9 - Homo sapiens	1.0674	0.6076	1.4247	0.0046
1.52	12.72	38.8	Q3B8N2|LEG9L_HUMAN	Galectin-9-like protein - Homo sapiens
14.46	14.48	65.5	P13284|GILT_HUMAN	Gamma-interferon-inducible lysosomal thiol reductase precursor - Homo sapiens	1.0771	0.032	0.925	0.0762
4.91	4.99	32.4	Q99747|SNAG_HUMAN	Gamma-soluble NSF attachment protein - Homo sapiens	0.9591	0.588	0.9668	0.3732
8.94	8.95	50.8	P17900|SAP3_HUMAN	Ganglioside GM2 activator precursor - Homo sapiens	0.9315	0.1246	0.7608	0
3.79	3.79	38.2	O43716|GATCL_HUMAN	GatC-like protein - Homo sapiens	0.816	0.1441	0.9141	0.1366
11.57	11.59	42.7	Q53X96|Q53X96_HUMAN	GBAS protein (Fragment) - Homo sapiens	0.9073	0.0509	0.9254	0.2176
5.67	5.69	28.2	O95479|G6PE_HUMAN	GDH/6PGL endoplasmic bifunctional protein precursor - Homo sapiens	0.8344	0.0233	0.9216	0.2565
1.58	1.74	11.1	Q9H488|OFUT1_HUMAN	GDP-fucose protein O-fucosyltransferase 1 precursor - Homo sapiens	0.813	0.6904	1.1095	0.4323
16.62	16.67	36.6	Q5T0I2|Q5T0I2_HUMAN	Gelsolin - Homo sapiens	1.2037	0.045	1.9656	0
1.64	1.65	9.8	Q6EVH4|Q6EVH4_HUMAN	Gene expressed in odontoblast protein - Homo sapiens	1.1325		0.9993
7.55	7.55	31.9	Q8N2G8|GHDC_HUMAN	GH3 domain-containing protein precursor - Homo sapiens	0.9696	0.4013	1.0187	0.8315
7.74	7.76	28	A8K8D9|A8K8D9_HUMAN	Glucose-6-phosphate 1-dehydrogenase - Homo sapiens	1.0533	0.5887	1.2652	0.0848
29.15	29.15	45.8	P14314|GLU2B_HUMAN	Glucosidase 2 subunit beta precursor - Homo sapiens	0.967	0.2373	1.1385	0
11.23	11.24	30.4	P04062|GLCM_HUMAN	Glucosylceramidase precursor - Homo sapiens	0.939	0.1066	1.0227	0.4943
48.65	48.69	68.8	P00367|DHE3_HUMAN	Glutamate dehydrogenase 1, mitochondrial precursor - Homo sapiens	0.9787	0.4599	0.9783	0.3376
14.42	14.43	42.2	O94925|GLSK_HUMAN	Glutaminase kidney isoform, mitochondrial precursor - Homo sapiens	0.9287	0.0784	0.9503	0.1193
2.38	2.41	47.2	P35754|GLRX1_HUMAN	Glutaredoxin-1 - Homo sapiens	1.1019	0.1905	1.2508	0.1271
12.13	12.14	60.5	Q86SX6|GLRX5_HUMAN	Glutaredoxin-related protein 5 - Homo sapiens	0.927	0.3577	0.8816	0.1439
10.64	10.65	34.9	Q92947|GCDH_HUMAN	Glutaryl-CoA dehydrogenase, mitochondrial precursor - Homo sapiens	1.0221	0.7476	1.0192	0.7314
11.79	11.82	52.7	P07203|GPX1_HUMAN	Glutathione peroxidase 1 - Homo sapiens	0.8936	0.041	0.9212	0.1299
7.94	7.95	25.9	P00390|GSHR_HUMAN	Glutathione reductase, mitochondrial precursor - Homo sapiens	0.9705	0.6148	0.9901	0.8575
20.23	20.26	61.5	Q9Y2Q3|GSTK1_HUMAN	Glutathione S-transferase kappa 1 - Homo sapiens	1.0196	0.4844	0.9177	0.0015
2.01	2.03	18.7	P78417|GSTO1_HUMAN	Glutathione transferase omega-1 - Homo sapiens
14.62	14.67	44.2	Q53X65|Q53X65_HUMAN	Glyceraldehyde 3-phosphate dehydrogenase (Fragment) - Homo sapiens	1.2285	0.0001	1.6486	0
13.01	13.07	30	Q6IQ27|Q6IQ27_HUMAN	Glycerol kinase - Homo sapiens	1.0122	0.7675	1.0214	0.607
3.53	3.57	14.8	Q8N335|GPD1L_HUMAN	Glycerol-3-phosphate dehydrogenase 1-like protein - Homo sapiens	1.1537	0.3053	1.1255	0.4658
44.03	44.03	56.4	P43304|GPDM_HUMAN	Glycerol-3-phosphate dehydrogenase, mitochondrial precursor - Homo sapiens	0.9554	0.1064	1.0279	0.1914
5.42	5.54	23.1	Q59EC9|Q59EC9_HUMAN	Glyceronephosphate O-acyltransferase variant (Fragment) - Homo sapiens	0.9888	0.8735	1.1056	0.1775
2.91	2.92	14.2	Q9NZC3|GDE1_HUMAN	Glycerophosphodiester phosphodiesterase 1 - Homo sapiens	0.9372	0.4259	1.061	0.6186
23.79	23.82	46.5	Q8NBJ5|GT251_HUMAN	Glycosyltransferase 25 family member 1 precursor - Homo sapiens	0.9695	0.3614	1.1214	0.0009
4.83	5.18	23.3	P41250|SYG_HUMAN	Glycyl-tRNA synthetase - Homo sapiens	0.9889	0.8071	0.9876	0.8155
2.2	2.23	11.3	O75487|GPC4_HUMAN	Glypican-4 precursor - Homo sapiens	0.8131	0.1343	0.7501	0.0386
6.02	11.03	35.8	Q5FWY2|Q5FWY2_HUMAN	GNAS complex locus - Homo sapiens	1.2833	0.0328	1.0217	0.8248
3.06	10.94	42.4	Q6FHM2|Q6FHM2_HUMAN	GNB2 protein - Homo sapiens	0.8512	0.037	0.9366	0.6211
33.57	33.72	36.8	Q6P9D1|Q6P9D1_HUMAN	Golgi apparatus protein 1 - Homo sapiens	0.9906	0.7511	0.8154	0
7.3	7.32	24.1	O00461|GOLI4_HUMAN	Golgi integral membrane protein 4 - Homo sapiens	1.0384	0.8245	0.9556	0.7997
2.1	2.17	31.9	Q8NBJ4|GOLM1_HUMAN	Golgi membrane protein 1 - Homo sapiens	1.2621	0.1731	1.0564	0.7547
2.04	2.13	21.8	Q9H4A6|GOLP3_HUMAN	Golgi phosphoprotein 3 - Homo sapiens	1.4628	0.0434	1.8217	0.3314
2.28	2.28	29.6	O95249|GOSR1_HUMAN	Golgi SNAP receptor complex member 1 - Homo sapiens	1.188	0.0562	1.0027	0.9788
4.8	4.81	45.5	Q9H4G4|GAPR1_HUMAN	Golgi-associated plant pathogenesis-related protein 1 - Homo sapiens	0.9829	0.8042	0.9865	0.7937
6.14	7.93	22.4	Q14789|GOGB1_HUMAN	Golgin subfamily B member 1 - Homo sapiens	1.1931	0.0228	1.0163	0.8224
2.6	2.92	11.2	Q92538|GBF1_HUMAN	Golgi-specific brefeldin A-resistance guanine nucleotide exchange factor 1 - Homo sapiens	1.0301	0.9244	1.2167	0.568
6.46	6.46	26.5	Q96S52|PIGS_HUMAN	GPI transamidase component PIG-S - Homo sapiens	1.0091	0.9383	1.0546	0.5063
2.08	2.09	20.6	Q969N2|PIGT_HUMAN	GPI transamidase component PIG-T precursor - Homo sapiens	1.0115	0.9472	1.2679	0.2036
3.56	3.58	16.7	Q92643|GPI8_HUMAN	GPI-anchor transamidase precursor - Homo sapiens	0.9249	0.2774	0.9948	0.966
7.05	7.07	34	Q5M7Z5|Q5M7Z5_HUMAN	GRHPR protein (Fragment) - Homo sapiens	0.9197	0.3883	1.0113	0.8617
5.84	5.99	21.9	Q12849|GRSF1_HUMAN	G-rich sequence factor 1 - Homo sapiens	0.9381	0.3123	0.9196	0.3555
1.37	1.86	41.9	Q8TAE8|G45IP_HUMAN	Growth arrest and DNA-damage-inducible proteins-interacting protein 1 - Homo sapiens	1.2101	0.0131	0.9624	0.6079
3	3.01	30.2	Q5VT94|Q5VT94_HUMAN	Growth hormone inducible transmembrane protein - Homo sapiens	0.9087	0.1601	1.0322	0.5462
14.04	14.05	38.8	Q2TU34|Q2TU34_HUMAN	Growth-inhibiting protein 17 - Homo sapiens	1.6216	0	1.7877	0
12.16	12.21	62.7	Q9HAV7|GRPE1_HUMAN	GrpE protein homolog 1, mitochondrial precursor - Homo sapiens	0.9831	0.6883	1.0503	0.3024
6.53	6.57	34.3	Q6IB17|Q6IB17_HUMAN	GSTZ1 protein - Homo sapiens	1.1037	0.2456	0.9781	0.7581
12.87	12.88	60.4	Q9UIJ7|KAD3_HUMAN	GTP:AMP phosphotransferase mitochondrial - Homo sapiens	1.0462	0.2194	0.8838	0.0001
7.08	7.12	40.5	Q8WWP7|GIMA1_HUMAN	GTPase IMAP family member 1 - Homo sapiens	0.9478	0.4609	1.1772	0.0022
2.94	5.03	29.6	P01116|RASK_HUMAN	GTPase KRas precursor - Homo sapiens	1.0296	0.8302	1.0635	0.2034
3.01	3.16	24.7	O75616|ERAL_HUMAN	GTP-binding protein era homolog - Homo sapiens	0.8572	0.1328	0.8615	0.033
5.55	5.66	35.9	Q9NR31|SAR1A_HUMAN	GTP-binding protein SAR1a - Homo sapiens	1.0584	0.4618	1.5661	0.0058
3.22	13.16	33.3	Q5TZX1|Q5TZX1_HUMAN	Guanine nucleotide binding protein (G protein), alpha inhibiting activity polypeptide 3 - Homo sapiens	1.1944	0.1641	1.1565	0.1754
4.71	4.94	33.1	Q6NT27|Q6NT27_HUMAN	Guanine nucleotide binding protein (G protein), q polypeptide - Homo sapiens	1.1866	0.0763	1.1581	0.0647
1.76	8.02	44.1	Q03113|GNA12_HUMAN	Guanine nucleotide-binding protein alpha-12 subunit - Homo sapiens	1.0822		1.0495
9.03	13.06	36.3	Q14344|GNA13_HUMAN	Guanine nucleotide-binding protein alpha-13 subunit - Homo sapiens	1.0754	0.2408	0.9371	0.3468
17.69	17.78	54.6	P04899|GNAI2_HUMAN	Guanine nucleotide-binding protein G(i), alpha-2 subunit - Homo sapiens	0.9978	0.9808	0.9633	0.4628
2.32	2.33	57.4	P50151|GBG10_HUMAN	Guanine nucleotide-binding protein G(I)/G(S)/G(O) subunit gamma-10 precursor - Homo sapiens	1.1149	0.6731	0.9977	0.9912
4.12	4.25	55.9	P63218|GBG5_HUMAN	Guanine nucleotide-binding protein G(I)/G(S)/G(O) subunit gamma-5 precursor - Homo sapiens	0.9894	0.8941	0.7976	0.0003
3.99	10.23	37.6	P62873|GBB1_HUMAN	Guanine nucleotide-binding protein G(I)/G(S)/G(T) subunit beta-1 - Homo sapiens	1.064	0.118	1.1201	0.051
14.79	14.79	23.9	Q9P2X2|Q9P2X2_HUMAN	HASCT1 - Homo sapiens	1.3341	0.0505	1.4887	0.0024
4.39	4.43	20.1	Q1HDL3|Q1HDL3_HUMAN	HBeAg-binding protein 2 binding protein A - Homo sapiens	0.9935	0.9645	0.9073	0.6363
2.51	2.51	15.4	Q6IBK9|Q6IBK9_HUMAN	HCLS1 protein - Homo sapiens	1.7215		1.8707
2.36	2.37	38	O00165|HAX1_HUMAN	HCLS1-associated protein X-1 - Homo sapiens	0.881	0.0673	0.8391	0.1231
4.27	4.36	24.2	Q96BR5|CA163_HUMAN	Hcp beta-lactamase-like protein C1orf163 - Homo sapiens	0.9802	0.649	0.9383	0.2417
6.83	22.22	46.8	Q59EJ3|Q59EJ3_HUMAN	Heat shock 70kDa protein 1A variant (Fragment) - Homo sapiens	1.1857	0.04	1.1057	0.0846
90.45	90.46	81	Q1HB43|Q1HB43_HUMAN	Heat shock 70kDa protein 9B - Homo sapiens	0.9775	0.1818	0.9878	0.4585
31.87	42.51	56.7	P11142|HSP7C_HUMAN	Heat shock cognate 71 kDa protein - Homo sapiens	1.043	0.2202	1.0275	0.3739
23.81	24.73	55.1	Q12931|TRAP1_HUMAN	Heat shock protein 75 kDa, mitochondrial precursor - Homo sapiens	0.9974	0.9676	1.0233	0.6209
2.13	2.18	16.1	P04792|HSPB1_HUMAN	Heat shock protein beta-1 - Homo sapiens	1.1654		4.106
3.13	10.86	22.8	P07900|HS90A_HUMAN	Heat shock protein HSP 90-alpha - Homo sapiens	1.1446	0.2747	1.4757	0.1299
7.73	12.9	28.3	P08238|HS90B_HUMAN	Heat shock protein HSP 90-beta - Homo sapiens	1.1206	0.5	1.678	0.0028
27.99	29.01	41	P19106|HEMA_I72A2	Hemagglutinin precursor - Influenza A virus (strain A/Udorn/307/1972 H3N2)	1.8552	0	7.5807	0
2.01	2.01	11.8	Q96DI8|Q96DI8_HUMAN	Heme oxygenase (Decycling) 1 - Homo sapiens	1.2981		0.9522
7.53	7.56	40.2	Q9NRV9|HEBP1_HUMAN	Heme-binding protein 1 - Homo sapiens	1.0024	0.9816	0.8435	0.0211
4.73	4.74	24.2	Q7LGA3|HS2ST_HUMAN	Heparan sulfate 2-O-sulfotransferase 1 - Homo sapiens	1.0332	0.5714	0.8343	0.02
3.19	3.19	22.2	Q9UK40|Q9UK40_HUMAN	Hepatopoietin - Homo sapiens	1.064	0.8699	0.6956	0.208
2.09	6.62	38.7	P09651|ROA1_HUMAN	Heterogeneous nuclear ribonucleoprotein A1 - Homo sapiens	0.9469	0.5741	1.5272	0.2949
2.08	4.67	35.2	P51991|ROA3_HUMAN	Heterogeneous nuclear ribonucleoprotein A3 - Homo sapiens	0.6886	0.0004	1.4639	0.0136
8.75	8.76	30.3	P22626|ROA2_HUMAN	Heterogeneous nuclear ribonucleoproteins A2/B1 - Homo sapiens	0.848	0.0996	1.7706	0.0533
5.75	5.8	22.8	Q59H08|Q59H08_HUMAN	Hexokinase 3 variant (Fragment) - Homo sapiens	1.0563	0.6811	1.2334	0.4077
2.77	2.77	39.5	P30273|FCERG_HUMAN	High affinity immunoglobulin epsilon receptor subunit gamma precursor - Homo sapiens	1.5446	0.1247	1.4601	0.1457
2.22	2.22	19.2	Q5U071|Q5U071_HUMAN	High-mobility group box 2 - Homo sapiens	1.205	0.0309	0.9988	0.9893
2.01	2.01	30	Q3B790|Q3B790_HUMAN	High-mobility group nucleosome binding domain 1 - Homo sapiens	0.951		0.8569
14.94	14.98	81	Q9BX68|HINT2_HUMAN	Histidine triad nucleotide-binding protein 2 - Homo sapiens	1.1025	0.0798	0.9141	0.1622
14.4	14.42	58.2	P16403|H12_HUMAN	Histone H1.2 - Homo sapiens	0.5716	0.012	0.6106	0.0128
5.9	10.48	40.7	P16401|H15_HUMAN	Histone H1.5 - Homo sapiens	0.5494	0	0.4713	0.0004
13.64	13.64	75	Q99878|H2A1J_HUMAN	Histone H2A type 1-J - Homo sapiens	0.4844	0	0.6045	0
3.01	5.51	53.1	Q71UI9|H2AV_HUMAN	Histone H2AV - Homo sapiens
9.22	9.22	72.2	Q99880|H2B1L_HUMAN	Histone H2B type 1-L - Homo sapiens	0.569	0	0.4484	0
2.95	3.11	22.3	Q6DN03|H2B2C_HUMAN	Histone H2B type 2-C - Homo sapiens	0.4561	0	0.4649	0
7.65	7.65	47.8	Q71DI3|H32_HUMAN	Histone H3.2 - Homo sapiens	0.5762	0	0.507	0
16.65	16.65	78.6	P62805|H4_HUMAN	Histone H4 - Homo sapiens	0.5235	0	0.4415	0
2	3.4	31.6	Q99525|H4G_HUMAN	Histone H4-like protein type G - Homo sapiens
6.79	6.79	38.5	P04233|HG2A_HUMAN	HLA class II histocompatibility antigen gamma chain - Homo sapiens	0.8831	0.0027	0.8059	0.0042
4.62	4.69	24.8	B0UXB6|B0UXB6_HUMAN	HLA-B associated transcript 5 - Homo sapiens	0.8927	0.4184	1.1398	0.4614
2.06	2.13	22.3	Q95HB9|Q95HB9_HUMAN	HLA-DPA1 protein - Homo sapiens
2.05	2.07	22.4	Q6DKG8|Q6DKG8_HUMAN	HLA-DQA1 protein - Homo sapiens	0.9629	0.4411	0.9367	0.3153
3.64	10.75	76.1	Q29703|Q29703_HUMAN	HLA-drb5 (Fragment) - Homo sapiens	1.0049	0.9084	0.8357	0.0027
12.38	12.39	36.6	Q6IBC0|Q6IBC0_HUMAN	HMGCL protein - Homo sapiens	0.9135	0.0354	0.8813	0.0097
6.8	6.86	31.6	Q6IBP2|Q6IBP2_HUMAN	HMOX2 protein - Homo sapiens	1.0592	0.6078	1.2763	0.1007
4.33	4.36	20.3	Q6IBM4|Q6IBM4_HUMAN	HNRPH1 protein - Homo sapiens	1.0041	0.9439	2.5679	0
2.82	2.93	34.3	Q6IBN1|Q6IBN1_HUMAN	HNRPK protein - Homo sapiens	1.0406	0.7637	1.6661	0.215
3.1	3.32	31.9	Q9BV64|Q9BV64_HUMAN	HNRPR protein - Homo sapiens	1.1008	0.2976	1.2348	0.0971
2	17.38	48.9	Q6W898|Q6W898_HUMAN	HSD-33 - Homo sapiens	0.9814	0.8144	1.0616	0.4319
17.79	17.79	82.4	Q53X54|Q53X54_HUMAN	HSPE1 protein (Fragment) - Homo sapiens	0.9953	0.8964	1.0042	0.8762
17.02	17.39	57.6	Q16836|HCDH_HUMAN	Hydroxyacyl-coenzyme A dehydrogenase, mitochondrial precursor - Homo sapiens	0.9792	0.4183	0.9609	0.1179
6.09	6.1	35	Q16775|GLO2_HUMAN	Hydroxyacylglutathione hydrolase - Homo sapiens	0.8181	0.3445	0.7492	0.0778
1.74	1.74	24.8	Q7Z5J1|DHI1L_HUMAN	Hydroxysteroid 11-beta-dehydrogenase 1-like protein precursor - Homo sapiens
10.08	10.16	31.1	Q6YN16|HSDL2_HUMAN	Hydroxysteroid dehydrogenase-like protein 2 - Homo sapiens	1.028	0.5998	1.0118	0.7951
37.8	37.8	47.6	Q9Y4L1|HYOU1_HUMAN	Hypoxia up-regulated protein 1 precursor - Homo sapiens	0.9671	0.3072	1.0556	0.1682
8.66	8.66	56.8	Q14197|ICT1_HUMAN	Immature colon carcinoma transcript 1 protein precursor - Homo sapiens	0.9817	0.7205	0.9879	0.7474
3.05	3.05	40.2	Q9Y5U9|IR3IP_HUMAN	Immediate early response 3-interacting protein 1 - Homo sapiens	1.0389	0.9292	0.9819	0.94
6	34.52	53.2	Q3B7X4|Q3B7X4_HUMAN	IMMT protein - Homo sapiens
2.17	2.33	18.7	Q93033|IGSF2_HUMAN	Immunoglobulin superfamily member 2 precursor - Homo sapiens	1.0093	0.9028	0.9454	0.6088
1.78	1.8	14.5	O95976|IGSF6_HUMAN	Immunoglobulin superfamily member 6 precursor - Homo sapiens	0.7587		0.6619
4.79	4.81	21.9	Q8N8Q8|COX18_HUMAN	Inner membrane protein COX18, mitochondrial precursor - Homo sapiens	1.038	0.5214	0.9535	0.4791
10.2	10.21	29.9	Q15070|OXA1L_HUMAN	Inner membrane protein OXA1L, mitochondrial precursor - Homo sapiens	0.9541	0.6042	0.8343	0.0035
16.89	17.15	65.9	Q9H2U2|IPYR2_HUMAN	Inorganic pyrophosphatase 2, mitochondrial precursor - Homo sapiens	1.0291	0.5215	0.9669	0.4391
27.06	27.18	29.9	Q14643|ITPR1_HUMAN	Inositol 1,4,5-trisphosphate receptor type 1 - Homo sapiens	0.981	0.5797	1.0344	0.5162
16.2	20.67	28.6	Q14571|ITPR2_HUMAN	Inositol 1,4,5-trisphosphate receptor type 2 - Homo sapiens	0.9303	0.1592	0.9888	0.8592
6.52	6.76	29.5	Q9NX62|IMPA3_HUMAN	Inositol monophosphatase 3 - Homo sapiens	0.8689	0.1583	1.0678	0.2944
14.73	14.73	23.5	P08648|ITA5_HUMAN	Integrin alpha-5 precursor - Homo sapiens	1.1818	0.009	1.1524	0.0076
18.67	18.71	24.9	P20701|ITAL_HUMAN	Integrin alpha-L precursor - Homo sapiens	0.9973	0.9634	1.0551	0.322
56.76	56.76	42.5	P11215|ITAM_HUMAN	Integrin alpha-M precursor - Homo sapiens	0.9461	0.0916	1.0212	0.5095
3.47	3.48	16.5	P06756|ITAV_HUMAN	Integrin alpha-V precursor - Homo sapiens	1.0419	0.6758	0.8631	0.1895
30.49	34.67	35.9	P20702|ITAX_HUMAN	Integrin alpha-X precursor - Homo sapiens	1.0424	0.2632	1.0839	0.0011
68.63	68.63	57	Q6PJ75|Q6PJ75_HUMAN	Integrin beta (Fragment) - Homo sapiens	0.9725	0.2353	0.9934	0.7371
17.18	18.6	24.1	Q7Z3V1|Q7Z3V1_HUMAN	Integrin beta (Fragment) - Homo sapiens	1.1021	0.0113	1.1284	0.0009
3.98	4.18	19.9	P05106|ITB3_HUMAN	Integrin beta-3 precursor - Homo sapiens	0.8507	0.1037	0.9366	0.8625
14.23	14.24	29.7	P05362|ICAM1_HUMAN	Intercellular adhesion molecule 1 precursor - Homo sapiens	1.3297	0.0196	1.1939	0.2268
6.52	6.55	24.3	Q6PD68|Q6PD68_HUMAN	Intercellular adhesion molecule 3 - Homo sapiens	0.9815	0.8381	1.1364	0.1086
8.73	8.73	29	Q1WMJ3|Q1WMJ3_HUMAN	Interleukin-4 induced protein-1 variant 2 - Homo sapiens	1.2398	0.0004	1.1619	0.0036
2.03	2.03	23.3	Q9BUE6|ISCA1_HUMAN	Iron-sulfur cluster assembly 1 homolog, mitochondrial precursor - Homo sapiens
6.73	6.75	51.5	Q9H1K1|ISCU_HUMAN	Iron-sulfur cluster assembly enzyme ISCU, mitochondrial precursor - Homo sapiens	1.0246	0.6447	1.0591	0.3959
7.92	7.98	32.7	Q7Z5B2|Q7Z5B2_HUMAN	Iron-sulfur cluster scaffold protein Nfu - Homo sapiens	1.0491	0.5926	1.0508	0.5392
8.73	8.74	26.7	Q9UKU7|ACAD8_HUMAN	Isobutyryl-CoA dehydrogenase, mitochondrial precursor - Homo sapiens	0.9209	0.137	0.907	0.1076
27.75	27.75	63.1	P50213|IDH3A_HUMAN	Isocitrate dehydrogenase [NAD] subunit alpha, mitochondrial precursor - Homo sapiens	0.9999	0.9968	0.94	0.02
25.44	26.26	60.3	O43837|IDH3B_HUMAN	Isocitrate dehydrogenase [NAD] subunit beta, mitochondrial precursor - Homo sapiens	1.0139	0.7537	0.9271	0.1148
6.2	7.19	34.6	P51553|IDH3G_HUMAN	Isocitrate dehydrogenase [NAD] subunit gamma, mitochondrial precursor - Homo sapiens	0.8771	0.0007	0.9995	0.9896
51.21	51.28	72.1	P48735|IDHP_HUMAN	Isocitrate dehydrogenase [NADP], mitochondrial precursor - Homo sapiens	0.936	0.0807	0.9033	0
39.94	39.98	44.1	Q9NSE4|SYIM_HUMAN	Isoleucyl-tRNA synthetase, mitochondrial precursor - Homo sapiens	0.9625	0.3151	1.004	0.9107
2.88	2.89	19.4	Q13907|IDI1_HUMAN	Isopentenyl-diphosphate Delta-isomerase 1 - Homo sapiens	0.835	0.3846	0.8983	0.4753
16.85	16.85	36.6	Q53XZ9|Q53XZ9_HUMAN	Isovaleryl Coenzyme A dehydrogenase - Homo sapiens	1.0103	0.7594	0.9381	0.08
2.87	2.87	32.2	Q6IB19|Q6IB19_HUMAN	JTB protein - Homo sapiens	1.117	0.3282	1.0208	0.7661
3.91	3.91	24.4	Q9Y624|JAM1_HUMAN	Junctional adhesion molecule A precursor - Homo sapiens	1.1772	0.5625	0.9838	0.8817
2	2.02	16.1	Q7Z5N2|Q7Z5N2_HUMAN	Kangai 1 - Homo sapiens	0.7642	0.2285	1.0279	0.7071
1.35	22.24	41.9	Q9BYX7|ACTK_HUMAN	Kappa-actin - Homo sapiens	0.7854	0.4663	1.3906	0.5102
2.1	2.23	14.2	Q7Z4H8|KDEL2_HUMAN	KDEL motif-containing protein 2 precursor - Homo sapiens	1.1438	0.3212	1.3114	0.0269
3.88	4.06	23.3	P13645|K1C10_HUMAN	Keratin, type I cytoskeletal 10 - Homo sapiens	1.1738	0.0191	0.7813	0.2514
11.3	13.34	45.2	P04264|K2C1_HUMAN	Keratin, type II cytoskeletal 1 - Homo sapiens	1.3423	0.0002	0.6732	0.0201
2.96	3.01	23.2	Q8N5L5|Q8N5L5_HUMAN	KIAA0391 - Homo sapiens	0.8407	0.0002	0.9443	0.3799
39.63	39.69	40.3	A3KMH1|A3KMH1_HUMAN	KIAA0564 protein (Fragment) - Homo sapiens	0.9857	0.6903	0.9567	0.1805
10.28	10.46	32.3	A4D229|A4D229_HUMAN	KIAA1228 protein - Homo sapiens	0.9578	0.7379	1.178	0.0791
11.74	11.98	31.5	Q86UP2|KTN1_HUMAN	Kinectin - Homo sapiens	1.259	0.1455	1.0658	0.4285
3.06	3.07	22.5	O43278|SPIT1_HUMAN	Kunitz-type protease inhibitor 1 precursor - Homo sapiens	1.5857	0.1073	0.7874	0.2659
8.97	9.04	36.8	Q6YP21|KAT3_HUMAN	Kynurenine--oxoglutarate transaminase 3 - Homo sapiens	0.9704	0.7118	1.1329	0.1565
2.3	2.31	27.9	Q9H9P8|L2HDH_HUMAN	L-2-hydroxyglutarate dehydrogenase, mitochondrial precursor - Homo sapiens	1.1328	0.2239	1.0403	0.6188
1.74	1.75	15.3	Q96G23|LASS2_HUMAN	LAG1 longevity assurance homolog 2 - Homo sapiens	0.7876	0.3957	0.9734	0.9447
2.23	2.24	13.3	Q6ZMG9|LASS6_HUMAN	LAG1 longevity assurance homolog 6 - Homo sapiens	0.8217	0.0835	0.911	0.4843
17.88	17.91	54.7	Q5TCJ2|Q5TCJ2_HUMAN	Lamin A/C - Homo sapiens	0.4782	0	0.7745	0.0028
5.06	5.12	19	Q14739|LBR_HUMAN	Lamin-B receptor - Homo sapiens	0.8438	0.0171	0.8024	0.0499
12.13	13.04	41.5	P20700|LMNB1_HUMAN	Lamin-B1 - Homo sapiens	0.7113	0.0252	0.9037	0.3325
3.78	4.91	35.5	Q03252|LMNB2_HUMAN	Lamin-B2 - Homo sapiens	0.8561	0.4429	0.876	0.15
10.85	10.87	24	P48449|ERG7_HUMAN	Lanosterol synthase - Homo sapiens	0.9953	0.9527	1.0621	0.4617
2.04	2.08	25.9	Q5T3Q4|Q5T3Q4_HUMAN	Lectin, galactoside-binding, soluble, 8 - Homo sapiens
12.38	12.51	30.2	Q53FS4|Q53FS4_HUMAN	Lectin, mannose-binding, 1 variant (Fragment) - Homo sapiens	0.9479	0.1724	1.0253	0.6174
7.18	7.19	33.8	Q8NC56|LEMD2_HUMAN	LEM domain-containing protein 2 - Homo sapiens	0.9291	0.3786	0.9545	0.4314
2.56	2.56	29.7	Q6P1Q0|LTMD1_HUMAN	LETM1 domain-containing protein 1 - Homo sapiens	0.976	0.8577	1.0343	0.7384
30.31	30.34	53.7	O95202|LETM1_HUMAN	Leucine zipper-EF-hand-containing transmembrane protein 1, mitochondrial precursor - Homo sapiens	0.9853	0.595	0.9426	0.033
2.07	2.09	9.1	Q96II8|LRCH3_HUMAN	Leucine-rich repeat and calponin homology domain-containing protein 3 precursor - Homo sapiens	2.019		1.6906
2.13	2.13	15.7	Q8N386|LRC25_HUMAN	Leucine-rich repeat-containing protein 25 precursor - Homo sapiens	1.1659	0.0576	0.9313	0.5427
12.02	12.05	45	Q96AG4|LRC59_HUMAN	Leucine-rich repeat-containing protein 59 - Homo sapiens	0.9966	0.9394	1.2201	0.0014
3.39	3.51	17.6	Q8TDW0|LRC8C_HUMAN	Leucine-rich repeat-containing protein 8C - Homo sapiens	0.8708	0.1107	0.9784	0.6222
4.23	4.3	14.5	Q9UIQ6|LCAP_HUMAN	Leucyl-cystinyl aminopeptidase - Homo sapiens	0.7558	0.204	0.844	0.2918
3.29	3.29	45.2	Q5MK14|Q5MK14_HUMAN	Leukemia-associated protein (Fragment) - Homo sapiens	1.8505	0.1383	1.1697	0.2505
45.43	45.44	31.6	P08575|CD45_HUMAN	Leukocyte common antigen precursor - Homo sapiens	1.0853	0.0083	1.1347	0
2.07	2.07	41.2	P08246|ELNE_HUMAN	Leukocyte elastase precursor - Homo sapiens	0.9793	0.8633	0.9938	0.9546
2.44	2.46	15.1	O75019|LIRA1_HUMAN	Leukocyte immunoglobulin-like receptor subfamily A member 1 precursor - Homo sapiens	0.8488	0.4608	0.8764	0.3324
4.01	4.15	12.4	O75022|LIRB3_HUMAN	Leukocyte immunoglobulin-like receptor subfamily B member 3 precursor - Homo sapiens	0.9578	0.6853	0.9084	0.3719
5.23	5.24	25	Q8NHJ6|LIRB4_HUMAN	Leukocyte immunoglobulin-like receptor subfamily B member 4 precursor - Homo sapiens	0.8641	0.1845	0.733	0.114
5.66	5.68	17	Q08722|CD47_HUMAN	Leukocyte surface antigen CD47 precursor - Homo sapiens	1.0655	0.3719	1.3099	0.0043
6.61	6.61	21	P16150|LEUK_HUMAN	Leukosialin precursor - Homo sapiens	2.5278	0.0102	1.7332	0.0006
12.6	12.6	55.6	Q6IBA7|Q6IBA7_HUMAN	LGALS3 protein - Homo sapiens	1.3594	0	1.0842	0.0554
1.31	1.65	12.9	Q9BU23|LMF2_HUMAN	Lipase maturation factor 2 - Homo sapiens	0.9296	0.6448	1.1046	0.2009
9.13	9.16	41.1	P11182|ODB2_HUMAN	Lipoamide acyltransferase component of branched-chain alpha-keto acid dehydrogenase complex, mitochondrial precursor - Homo sapiens	0.904	0.0213	0.9439	0.374
1.72	3.49	26.9	Q5U077|Q5U077_HUMAN	L-lactate dehydrogenase - Homo sapiens	1.1467	0.1426	1.1163	0.1988
5.19	5.23	28.3	P00338|LDHA_HUMAN	L-lactate dehydrogenase A chain - Homo sapiens	1.2225	0.0407	1.7168	0.019
48.04	48.06	53.3	P36776|LONM_HUMAN	Lon protease homolog, mitochondrial precursor - Homo sapiens	0.9558	0.1067	0.8811	0
7.61	7.63	21.5	Q6PCB7|S27A1_HUMAN	Long-chain fatty acid transport protein 1 - Homo sapiens	0.851	0.1952	1.0749	0.3019
18.26	18.26	26.8	Q5K4L6|S27A3_HUMAN	Long-chain fatty acid transport protein 3 - Homo sapiens	0.9047	0.0478	1.1616	0.0036
1.55	4.24	26.7	Q6P1M0|S27A4_HUMAN	Long-chain fatty acid transport protein 4 - Homo sapiens	0.8572	0.482	0.9574	0.8655
22.42	22.43	38.8	P33121|ACSL1_HUMAN	Long-chain-fatty-acid--CoA ligase 1 - Homo sapiens	1.0924	0.0592	1.0728	0.0845
15.04	15.05	31	O95573|ACSL3_HUMAN	Long-chain-fatty-acid--CoA ligase 3 - Homo sapiens	0.9288	0.0752	1.1777	0.0437
2.18	2.67	19	Q9ULC5|ACSL5_HUMAN	Long-chain-fatty-acid--CoA ligase 5 - Homo sapiens	0.9419	0.2027	0.9932	0.9303
5.14	5.37	17.8	Q6IAT6|Q6IAT6_HUMAN	LTA4H protein - Homo sapiens	2.7887	0.0344	2.9661	0.0401
12.59	12.59	54.9	Q7Z4W1|DCXR_HUMAN	L-xylulose reductase - Homo sapiens	0.9989	0.9805	0.9415	0.238
2.25	2.29	11.1	O60449|LY75_HUMAN	Lymphocyte antigen 75 precursor - Homo sapiens	1.23	0.0271	1.0819	0.0702
21.74	21.77	38	Q5TBN4|Q5TBN4_HUMAN	Lymphocyte cytosolic protein 1 - Homo sapiens	1.5823	0.0005	1.6326	0.0004
18.72	18.72	47.5	Q53H48|Q53H48_HUMAN	Lymphocyte-specific protein 1 variant (Fragment) - Homo sapiens	1.8537	0.0268	1.2861	0.0302
7.04	7.06	30.9	Q6NUK7|Q6NUK7_HUMAN	LYN protein (Fragment) - Homo sapiens	1.0857	0.4583	1.0568	0.7227
8.48	8.56	54.3	Q6IAQ1|Q6IAQ1_HUMAN	LYPLA1 protein - Homo sapiens	1.0499	0.5541	1.0976	0.3426
2.16	2.19	46.6	Q9NU23|LYRM2_HUMAN	LYR motif-containing protein 2 - Homo sapiens	0.9599	0.7154	0.9707	0.7198
1.73	1.76	14.2	Q6P1A2|MBOA5_HUMAN	Lysophosphatidylcholine acyltransferase - Homo sapiens	0.8329	0.1259	1.1725	0.5061
10.08	10.1	32.4	Q7L5N7|PCAT2_HUMAN	Lysophosphatidylcholine acyltransferase 2 - Homo sapiens	0.9722	0.571	1.1125	0.0951
3.51	3.51	34.6	Q5VWZ2|LYPL1_HUMAN	Lysophospholipase-like protein 1 - Homo sapiens	0.8484	0.3396	0.7893	0.1255
5.55	5.55	22.2	P11117|PPAL_HUMAN	Lysosomal acid phosphatase precursor - Homo sapiens	0.8979	0.0283	0.9704	0.6248
24.77	24.8	30.9	P10253|LYAG_HUMAN	Lysosomal alpha-glucosidase precursor - Homo sapiens	0.9323	0.0956	0.9828	0.7838
52.52	52.55	53.7	O00754|MA2B1_HUMAN	Lysosomal alpha-mannosidase precursor - Homo sapiens	0.9456	0.0739	0.9395	0.0128
3.04	3.05	14.6	Q9UD93|Q9UD93_HUMAN	Lysosomal membrane glycoprotein LAMP-2 homolog - Homo sapiens	0.6822	0	0.7956	0.0021
4.12	4.17	18.1	P42785|PCP_HUMAN	Lysosomal Pro-X carboxypeptidase precursor - Homo sapiens	0.9094	0.0134	0.865	0.0605
11.24	11.25	31.9	Q8WU33|Q8WU33_HUMAN	Lysosomal-associated membrane protein 1 - Homo sapiens	0.8186	0	0.946	0.0433
7.24	7.24	28.8	Q8N6Z9|Q8N6Z9_HUMAN	Lysosome-associated membrane protein-3 variant - Homo sapiens	0.9914	0.7611	0.9446	0.0592
14.53	14.53	73.6	P61626|LYSC_HUMAN	Lysozyme C precursor - Homo sapiens	0.876	0.0003	0.5613	0
4.67	4.69	27.1	Q6I9U3|Q6I9U3_HUMAN	M6PR protein - Homo sapiens	0.903	0.1681	0.9193	0.3881
2.11	2.11	25.5	Q9BQ69|MACD1_HUMAN	MACRO domain-containing protein 1 - Homo sapiens	1.0083	0.9196	1.0712	0.6596
4.02	4.03	9.3	Q9UBG0|MRC2_HUMAN	Macrophage mannose receptor 2 precursor - Homo sapiens	1.1038	0.5821	0.8967	0.663
12.86	12.88	38.4	P21757|MSRE_HUMAN	Macrophage scavenger receptor types I and II - Homo sapiens	0.996	0.9444	0.734	0.0001
2.21	2.22	29.6	Q9HD23|MRS2_HUMAN	Magnesium transporter MRS2 homolog, mitochondrial precursor - Homo sapiens	0.9508	0.7223	1.1866	0.334
1.4	1.48	7.2	Q96JB8|MPP4_HUMAN	MAGUK p55 subfamily member 4 - Homo sapiens	1.0998	0.4576	1.227	0.4705
6.86	10.46	37.6	Q5SQ73|Q5SQ73_HUMAN	Major histocompatibility complex, class II, DP beta 1 - Homo sapiens	0.9308	0.579	0.9237	0.1798
1.72	8.92	51.9	Q5STE0|Q5STE0_HUMAN	Major histocompatibility complex, class II, DR beta 3 - Homo sapiens	0.8667		0.6918
2	2.01	12.2	Q86XR1|Q86XR1_HUMAN	Major prion protein (Fragment) - Homo sapiens
42.5	42.52	79.6	A8K414|A8K414_HUMAN	Malate dehydrogenase - Homo sapiens	0.8874	0	0.9315	0.0148
4.63	4.65	28.5	Q8IVS2|FABD_HUMAN	Malonyl CoA-acyl carrier protein transacylase, mitochondrial precursor - Homo sapiens	0.9223	0.2434	0.9337	0.6238
10.26	10.27	39.6	O95822|DCMC_HUMAN	Malonyl-CoA decarboxylase, mitochondrial precursor - Homo sapiens	0.999	0.9826	0.8863	0.0724
63.03	63.04	41.6	Q5VSK2|Q5VSK2_HUMAN	Mannose receptor C type 1-like protein 1 - Homo sapiens	1.0875	0.0028	0.7625	0
4.82	4.84	32.6	Q59G70|Q59G70_HUMAN	Mannosyl (Alpha-1,3-)-glycoprotein beta-1,2-N-acetylglucosaminyltransferase variant (Fragment) - Homo sapiens	1.0854	0.1163	0.9677	0.479
5.51	5.54	29.6	P33908|MA1A1_HUMAN	Mannosyl-oligosaccharide 1,2-alpha-mannosidase IA - Homo sapiens	0.9546	0.5964	0.7364	0.0163
17.06	17.08	38.9	Q13724|GCS1_HUMAN	Mannosyl-oligosaccharide glucosidase - Homo sapiens	0.9702	0.5744	1.0895	0.1311
2.12	2.14	15.6	Q9NZD8|SPG21_HUMAN	Maspardin - Homo sapiens	1.1602	0.3445	1.2049	0.4101
5.37	5.39	18.9	P50281|MMP14_HUMAN	Matrix metalloproteinase-14 precursor - Homo sapiens	1.2271	0.0049	1.2038	0.2592
1.55	1.69	15.8	Q8N119|MMP21_HUMAN	Matrix metalloproteinase-21 precursor - Homo sapiens	0.869	0.0595	0.834	0.2257
2.17	2.17	13.7	P14780|MMP9_HUMAN	Matrix metalloproteinase-9 precursor - Homo sapiens	0.8677	0.0352	0.751	0.0338
8.37	8.37	42.5	P63233|M1_I72A2	Matrix protein 1 - Influenza A virus (strain A/Udorn/307/1972 H3N2)	1.2468	0.158	5.1874	0
2.19	2.2	42.6	Q5HYP9|Q5HYP9_HUMAN	Mature T-cell proliferation 1 - Homo sapiens	0.6399	0.4765	0.7948	0.5613
1.31	1.34	19.3	B0QY84|B0QY84_HUMAN	Megakaryoblastic leukemia (Translocation) 1 - Homo sapiens
7.88	7.97	17.5	Q5JRA6|MIA3_HUMAN	Melanoma inhibitory activity protein 3 precursor - Homo sapiens	1.0496	0.5487	1.2136	0.0084
39.77	39.77	38.7	Q59E93|Q59E93_HUMAN	Membrane alanine aminopeptidase variant (Fragment) - Homo sapiens	1.0745	0.0088	1.0242	0.3685
10.52	10.52	39.5	O15173|PGRC2_HUMAN	Membrane-associated progesterone receptor component 2 - Homo sapiens	1.003	0.9814	1.0573	0.562
1.76	1.89	14.7	Q6ZNC8|MBOA1_HUMAN	Membrane-bound O-acyltransferase domain-containing protein 1 - Homo sapiens	0.991	0.7694	0.9073	0.1001
2.05	2.08	9.3	Q96N66|MBOA7_HUMAN	Membrane-bound O-acyltransferase domain-containing protein 7 - Homo sapiens	0.8268	0.0768	0.9013	0.2363
14.05	14.05	57.7	Q14696|MESD2_HUMAN	Mesoderm development candidate 2 - Homo sapiens	0.9674	0.5046	1.0531	0.2843
13.76	13.81	50.4	B1AVR9|B1AVR9_HUMAN	Metaxin 1 - Homo sapiens	0.9355	0.3106	0.8927	0.3128
4.24	4.25	26.9	Q8IZ68|Q8IZ68_HUMAN	Metaxin 2 - Homo sapiens	1.0873	0.3772	0.9256	0.2759
2.01	2.02	25.3	Q9Y3D2|MSRB2_HUMAN	Methionine-R-sulfoxide reductase B2, mitochondrial precursor - Homo sapiens	0.8653	0.6694	0.7475	0.3708
2.04	2.14	20.3	Q96DP5|FMT_HUMAN	Methionyl-tRNA formyltransferase, mitochondrial precursor - Homo sapiens	0.8493	0.2025	1.2347	0.3874
5.39	5.4	26.1	Q96GW9|SYMM_HUMAN	Methionyl-tRNA synthetase, mitochondrial precursor - Homo sapiens	0.9216	0.1933	0.8471	0.1126
14.96	14.98	41.9	Q9HCC0|MCCB_HUMAN	Methylcrotonoyl-CoA carboxylase beta chain, mitochondrial precursor - Homo sapiens	0.948	0.2335	0.9533	0.2759
3.73	5.81	24.7	Q96RQ3|MCCA_HUMAN	Methylcrotonoyl-CoA carboxylase subunit alpha, mitochondrial precursor - Homo sapiens	1.0742	0.2328	1.0163	0.6162
2.35	2.37	13.6	Q8IVH4|MMAA_HUMAN	Methylmalonic aciduria type A protein, mitochondrial precursor - Homo sapiens	1.1218	0.4319	0.9385	0.6028
3.74	3.83	31.8	Q96PE7|MCEE_HUMAN	Methylmalonyl-CoA epimerase, mitochondrial precursor - Homo sapiens	1.0518	0.544	1.0434	0.5573
10.99	11.19	30.7	P22033|MUTA_HUMAN	Methylmalonyl-CoA mutase, mitochondrial precursor - Homo sapiens	1.0511	0.1243	0.989	0.8065
2.85	2.85	25	Q9H8H3|MET7A_HUMAN	Methyltransferase-like protein 7A precursor - Homo sapiens	1.1442	0.2386	1.1172	0.0145
2.71	2.72	29.1	Q6UX53|MET7B_HUMAN	Methyltransferase-like protein 7B precursor - Homo sapiens	1.1494	0.2385	1.1799	0.3401
2.03	2.04	21.3	Q6LET6|Q6LET6_HUMAN	MGST1 protein (Fragment) - Homo sapiens	0.9374	0.6084	0.8012	0.5442
4.6	4.61	30.6	Q30118|Q30118_HUMAN	MHC cell surface glycoprotein precursor - Homo sapiens	1.0545	0.7308	0.949	0.6525
28.14	28.14	56.9	A4H284|A4H284_HUMAN	MHC class I antigen - Homo sapiens	0.9804	0.7501	1.1388	0.2538
4.35	19.31	56.6	Q546L8|Q546L8_HUMAN	MHC class I antigen - Homo sapiens	0.932	0.4311	0.8237	0.1051
2.15	10.57	69.6	Q860B1|Q860B1_HUMAN	MHC class I antigen (Fragment) - Homo sapiens	0.8955	0.3693	0.7829	0.0929
8.7	21.15	59.1	Q6R741|Q6R741_HUMAN	MHC class I antigen precursor (Fragment) - Homo sapiens	0.9532	0.3504	0.8977	0.1436
6.9	6.95	51.3	Q5Y7D6|Q5Y7D6_HUMAN	MHC class II antigen - Homo sapiens	1.0601	0.4732	0.861	0.0409
2.19	2.19	18.6	Q58ZE2|Q58ZE2_HUMAN	MHC class II antigen - Homo sapiens	0.7843	0	0.8984	0.0061
17.13	17.13	79.1	Q3LA86|Q3LA86_HUMAN	MHC class II antigen (Fragment) - Homo sapiens	1.0133	0.8372	0.9815	0.6973
2.09	10.47	87.6	Q5DUF5|Q5DUF5_HUMAN	MHC class II antigen (Fragment) - Homo sapiens	0.6244	0.0516	0.8026	0.1059
2	2.02	13.6	Q99735|MGST2_HUMAN	Microsomal glutathione S-transferase 2 - Homo sapiens	0.7928	0.5256	0.6992	0.2214
5.89	5.91	44.6	Q5VV89|Q5VV89_HUMAN	Microsomal glutathione S-transferase 3 - Homo sapiens	0.9827	0.6731	1.0209	0.8199
1.39	2.46	14	Q9NU22|MDN1_HUMAN	Midasin - Homo sapiens	0.9515	0.3781	0.8655	0.388
8.34	8.35	49.7	Q8N183|MIMIT_HUMAN	Mimitin, mitochondrial precursor - Homo sapiens	1.2352	0.0031	1.1021	0.2796
12.76	12.79	28.6	Q8TCT9|HM13_HUMAN	Minor histocompatibility antigen H13 - Homo sapiens	0.8933	0.0178	1.048	0.3645
2.75	2.75	25.9	Q9UDX5|MTP18_HUMAN	Mitochondrial 18 kDa protein - Homo sapiens	1.071	0.3607	1.0281	0.76
3.66	3.67	23.4	P82664|RT10_HUMAN	Mitochondrial 28S ribosomal protein S10 - Homo sapiens	0.8866	0.4384	0.8891	0.2052
2.04	2.04	32.8	O60783|RT14_HUMAN	Mitochondrial 28S ribosomal protein S14 - Homo sapiens	1.1108	0.3846	1.2181	0.2336
8.12	8.13	45.9	Q9Y399|RT02_HUMAN	Mitochondrial 28S ribosomal protein S2 - Homo sapiens	0.9787	0.7893	1.012	0.8541
18.48	18.53	55.6	P82650|RT22_HUMAN	Mitochondrial 28S ribosomal protein S22 - Homo sapiens	0.9035	0.0387	0.9	0.0232
4.3	4.3	36.4	P82663|RT25_HUMAN	Mitochondrial 28S ribosomal protein S25 - Homo sapiens	0.8819	0.1927	0.9908	0.9027
13.99	14.04	41.8	Q92552|RT27_HUMAN	Mitochondrial 28S ribosomal protein S27 - Homo sapiens
6.49	6.52	39.6	Q9Y2Q9|RT28_HUMAN	Mitochondrial 28S ribosomal protein S28 - Homo sapiens	1.0733	0.3429	0.904	0.467
3.58	3.59	21	Q9NP92|RT30_HUMAN	Mitochondrial 28S ribosomal protein S30 - Homo sapiens	1.0144	0.8648	0.9961	0.94
2.08	2.1	48.1	Q9Y291|RT33_HUMAN	Mitochondrial 28S ribosomal protein S33 - Homo sapiens	0.7231	0.003	0.8268	0.1821
5.91	6.07	35.3	P82930|RT34_HUMAN	Mitochondrial 28S ribosomal protein S34 - Homo sapiens	0.9873	0.8961	0.9174	0.3115
8.02	8.03	64.1	P82909|RT36_HUMAN	Mitochondrial 28S ribosomal protein S36 - Homo sapiens	1.0262	0.5591	0.8678	0.0431
6.53	6.56	60	P82932|RT06_HUMAN	Mitochondrial 28S ribosomal protein S6 - Homo sapiens	1.0186	0.715	0.9042	0.077
5.06	5.06	59.5	Q16540|RM23_HUMAN	Mitochondrial 39S ribosomal protein L23 - Homo sapiens	0.8037	0.0703	0.8545	0.0417
3.1	3.12	32.4	Q9P0M9|RM27_HUMAN	Mitochondrial 39S ribosomal protein L27 - Homo sapiens	0.9169	0.2224	1.1071	0.0459
9.35	9.4	45.6	Q9NYK5|RM39_HUMAN	Mitochondrial 39S ribosomal protein L39 - Homo sapiens	0.9129	0.0723	0.9641	0.5266
7.27	7.3	48.2	Q9BYD3|RM04_HUMAN	Mitochondrial 39S ribosomal protein L4 - Homo sapiens	0.927	0.1627	0.8273	0.0463
9.39	9.39	48.2	Q13405|RM49_HUMAN	Mitochondrial 39S ribosomal protein L49 - Homo sapiens	0.9739	0.6684	0.9827	0.7818
8.47	8.47	62.7	Q8N5N7|RM50_HUMAN	Mitochondrial 39S ribosomal protein L50 - Homo sapiens	0.797	0.1688	0.8758	0.3281
58.97	58.98	72.3	Q53FB6|Q53FB6_HUMAN	Mitochondrial aldehyde dehydrogenase 2 variant (Fragment) - Homo sapiens	0.9559	0.1157	0.9072	0.0002
2.08	2.08	6.7	Q7Z434|MAVS_HUMAN	Mitochondrial antiviral-signaling protein - Homo sapiens
12.72	12.72	46.8	O43772|MCAT_HUMAN	Mitochondrial carnitine/acylcarnitine carrier protein - Homo sapiens	0.9401	0.1685	0.79	0.0002
5.89	5.89	33	Q8N8R3|MCATL_HUMAN	Mitochondrial carnitine/acylcarnitine carrier protein CACL - Homo sapiens	0.9395	0.2706	0.763	0.0003
9.53	9.55	31.4	Q9Y6C9|MTCH2_HUMAN	Mitochondrial carrier homolog 2 - Homo sapiens	1.1369	0.0053	0.9092	0.0072
4.82	5.64	16.2	Q9Y276|BCS1_HUMAN	Mitochondrial chaperone BCS1 - Homo sapiens	1.0259	0.8202	1.1627	0.0682
12.18	12.36	47.8	Q6LAP8|Q6LAP8_HUMAN	Mitochondrial citrate transport protein (Fragment) - Homo sapiens	0.9732	0.5461	0.889	0.0474
12.26	12.27	53.8	Q9HC21|DNC_HUMAN	Mitochondrial deoxynucleotide carrier - Homo sapiens	1.0749	0.0264	1.0176	0.6783
10.1	10.19	40.1	Q9UBX3|DIC_HUMAN	Mitochondrial dicarboxylate carrier - Homo sapiens	1.0065	0.9524	0.9276	0.8348
2.2	2.2	25.7	Q8WVM0|TFB1M_HUMAN	Mitochondrial dimethyladenosine transferase 1, mitochondrial precursor - Homo sapiens	0.8576	0.0046	0.9875	0.8973
8	8.01	36.9	Q9H5Q4|TFB2M_HUMAN	Mitochondrial dimethyladenosine transferase 2, mitochondrial precursor - Homo sapiens	0.9582	0.4193	0.8917	0.0512
2.07	2.1	35.5	Q9Y3D6|FIS1_HUMAN	Mitochondrial fission 1 protein - Homo sapiens	1.0024	0.9882	0.8589	0.2591
2.86	2.87	21	Q9H2D1|MFTC_HUMAN	Mitochondrial folate transporter/carrier - Homo sapiens	0.9512	0.628	0.882	0.301
5.2	5.23	36.2	Q9H936|GHC1_HUMAN	Mitochondrial glutamate carrier 1 - Homo sapiens	0.9358	0.2506	0.9935	0.8448
2.21	2.28	40	P62072|TIM10_HUMAN	Mitochondrial import inner membrane translocase subunit Tim10 - Homo sapiens	1.1844	0.1335	0.8528	0.1883
10	10.01	63.2	Q9Y5L4|TIM13_HUMAN	Mitochondrial import inner membrane translocase subunit Tim13 - Homo sapiens	0.8132	0.1099	0.9536	0.607
8.78	8.79	77.6	Q96DA6|TIM14_HUMAN	Mitochondrial import inner membrane translocase subunit TIM14 - Homo sapiens	1.0087	0.9118	0.9832	0.778
1.53	1.53	19.1	Q9Y584|TIM22_HUMAN	Mitochondrial import inner membrane translocase subunit Tim22 - Homo sapiens	0.9723	0.5643	0.8427	0.2692
4.07	4.07	24.9	O14925|TIM23_HUMAN	Mitochondrial import inner membrane translocase subunit Tim23 - Homo sapiens	0.6643	0.3648	0.7805	0.2412
1.85	1.85	18.1	Q9Y5J9|TIM8B_HUMAN	Mitochondrial import inner membrane translocase subunit Tim8 B - Homo sapiens	0.9202	0.5868	0.9187	0.2655
4	4	30.3	Q9Y5J7|TIM9_HUMAN	Mitochondrial import inner membrane translocase subunit Tim9 - Homo sapiens	1.2224	0.0362	1.1179	0.3134
2.11	2.19	42.1	Q15388|TOM20_HUMAN	Mitochondrial import receptor subunit TOM20 homolog - Homo sapiens	1.2676	0.0168	1.275	0.0894
5.82	5.83	38	Q9NS69|TOM22_HUMAN	Mitochondrial import receptor subunit TOM22 homolog - Homo sapiens	0.7401	0.0313	1.0032	0.9861
11.87	11.89	27.1	O96008|TOM40_HUMAN	Mitochondrial import receptor subunit TOM40 homolog - Homo sapiens	1.0793	0.089	1.1464	0.0071
5.73	5.76	72.7	Q9P0U1|TOM7_HUMAN	Mitochondrial import receptor subunit TOM7 homolog - Homo sapiens	0.9976	0.9786	0.6886	0.0008
82.82	82.87	67.8	Q16891|IMMT_HUMAN	Mitochondrial inner membrane protein - Homo sapiens	1.0276	0.2679	1.0591	0.0319
19.31	19.39	44.2	Q99797|MIPEP_HUMAN	Mitochondrial intermediate peptidase, mitochondrial precursor - Homo sapiens	0.9954	0.9518	0.9717	0.6663
6.07	6.14	31.7	Q8N4Q1|MIA40_HUMAN	Mitochondrial intermembrane space import and assembly protein 40 - Homo sapiens	1.0469	0.7836	0.8743	0.2117
25.09	25.09	48.4	A5YVE9|A5YVE9_HUMAN	Mitochondrial PDHA1 - Homo sapiens	0.9631	0.141	0.9713	0.2974
26.79	26.8	48.8	O94826|TOM70_HUMAN	Mitochondrial precursor proteins import receptor - Homo sapiens	1.2108	0.0001	1.209	0
6.09	6.96	21.4	Q8IXI2|MIRO1_HUMAN	Mitochondrial Rho GTPase 1 - Homo sapiens	0.9963	0.9857	1.0724	0.7107
4.19	5.4	23.1	Q8IXI1|MIRO2_HUMAN	Mitochondrial Rho GTPase 2 - Homo sapiens	0.925	0.6249	0.9315	0.6816
4.67	4.79	46.5	Q4TT38|Q4TT38_HUMAN	Mitochondrial ribosomal protein L28 - Homo sapiens	0.9884	0.8341	1.003	0.9637
11.11	11.11	65.4	B1AL10|B1AL10_HUMAN	Mitochondrial ribosomal protein L43 - Homo sapiens	0.9391	0.2945	0.9492	0.419
5.2	5.2	41.2	Q53FX9|Q53FX9_HUMAN	Mitochondrial ribosomal protein S11 isoform a variant (Fragment) - Homo sapiens	0.8888	0.6151	0.9425	0.4335
2.86	2.86	47.1	Q5TB11|Q5TB11_HUMAN	Mitochondrial ribosomal protein S21 - Homo sapiens	0.9767	0.6494	0.8345	0.2634
8.56	8.63	56.3	Q9Y3D9|RT23_HUMAN	Mitochondrial ribosomal protein S23 - Homo sapiens	0.9476	0.4179	0.8789	0.1136
2	14.03	41.8	Q6P1S1|Q6P1S1_HUMAN	Mitochondrial ribosomal protein S27 - Homo sapiens
8.88	8.98	35.6	Q6PG40|Q6PG40_HUMAN	Mitochondrial ribosomal protein S9 - Homo sapiens	1.2066	0.0757	2.251	0.0087
19.13	19.71	46.6	O75439|MPPB_HUMAN	Mitochondrial-processing peptidase subunit beta, mitochondrial precursor - Homo sapiens	0.8861	0.0358	0.8626	0.0046
6.41	6.42	21.3	O95140|MFN2_HUMAN	Mitofusin-2 - Homo sapiens	1.2175	0.0244	1.1179	0.1206
1.75	1.77	32.3	Q9UHA4|MK1I1_HUMAN	Mitogen-activated protein kinase kinase 1-interacting protein 1 - Homo sapiens	1.5224	0.3617	1.437	0.1691
28.97	28.97	48.7	P26038|MOES_HUMAN	Moesin - Homo sapiens	1.9988	0	1.4105	0
12.35	12.36	21.5	O15427|MOT4_HUMAN	Monocarboxylate transporter 4 - Homo sapiens	1.1564	0.1313	0.9445	0.4422
3.72	3.72	27	Q5VT66|MOSC1_HUMAN	MOSC domain-containing protein 1, mitochondrial precursor - Homo sapiens	0.9843	0.825	1.04	0.6631
2.04	2.07	11	Q8NHP6|MSPD2_HUMAN	Motile sperm domain-containing protein 2 - Homo sapiens	0.9456	0.6732	1.0643	0.4423
4.71	4.72	32.7	Q6FHN9|Q6FHN9_HUMAN	MPST protein (Fragment) - Homo sapiens	1.0666	0.1644	0.9017	0.1301
6.91	6.95	31.1	Q6LC01|Q6LC01_HUMAN	MRNA encoding beta-tubulin. (Fragment) - Homo sapiens	1.0961	0.4625	1.7111	0.0501
12.22	12.27	44	Q6IBT2|Q6IBT2_HUMAN	MRPL3 protein - Homo sapiens	0.9521	0.4116	0.9583	0.2904
7.86	8.08	44.8	Q8N5D1|Q8N5D1_HUMAN	MRPL47 protein - Homo sapiens	1.0158	0.8482	1.0775	0.2754
4.44	4.45	23.2	Q8IW90|Q8IW90_HUMAN	MTCH1 protein (Fragment) - Homo sapiens	0.8995	0.3508	0.8821	0.0225
5.17	5.34	20	P33527|MRP1_HUMAN	Multidrug resistance-associated protein 1 - Homo sapiens	1.0317	0.6935	0.9601	0.4123
3.04	3.07	27	Q5VUU6|Q5VUU6_HUMAN	Myeloid cell nuclear differentiation antigen - Homo sapiens	0.9887	0.925	1.0545	0.4753
3.96	3.96	15.5	Q96S97|MYADM_HUMAN	Myeloid-associated differentiation marker - Homo sapiens	1.0941	0.5725	1.1381	0.4239
19.36	19.36	43.8	P05164|PERM_HUMAN	Myeloperoxidase precursor - Homo sapiens	0.9041	0.003	0.9425	0.257
4.9	5.21	28.7	Q4LE56|Q4LE56_HUMAN	MYO1C variant protein (Fragment) - Homo sapiens	1.1397	0.0313	1.0477	0.3908
16.07	16.24	37.5	B0I1T2|B0I1T2_HUMAN	MYO1G variant protein - Homo sapiens	1.1087	0.2578	0.8799	0.068
101.85	102	45.5	Q9NZM1|MYOF_HUMAN	Myoferlin - Homo sapiens	0.951	0.0133	0.9816	0.2714
11	11.04	49.1	Q53X45|Q53X45_HUMAN	Myosin regulatory light chain - Homo sapiens	1.0947	0.0513	1.5463	0
14.09	14.13	47.7	Q561V9|Q561V9_HUMAN	Myosin, light chain 6, alkali, smooth muscle and non-muscle - Homo sapiens	1.3442	0	1.4721	0
5.33	6.01	28.3	O94832|MYO1D_HUMAN	Myosin-Id - Homo sapiens	1.0732	0.5429	0.9937	0.9592
1.39	1.77	20.2	Q9Y4I1|MYO5A_HUMAN	Myosin-Va - Homo sapiens	1.0094	0.9349	0.7884	0.5593
6.84	6.84	29.8	P29966|MARCS_HUMAN	Myristoylated alanine-rich C-kinase substrate - Homo sapiens	1.1939	0.1259	1.2806	0.0729
2.06	2.06	9.8	P20933|ASPG_HUMAN	N(4)-(beta-N-acetylglucosaminyl)-L-asparaginase precursor - Homo sapiens	0.9743	0.8688	0.9235	0.6033
9.73	9.74	33.7	P34059|GALNS_HUMAN	N-acetylgalactosamine-6-sulfatase precursor - Homo sapiens	1.0364	0.8364	0.9102	0.1748
13.64	13.68	34.1	Q86SF2|GALT7_HUMAN	N-acetylgalactosaminyltransferase 7 - Homo sapiens	1.0111	0.8662	0.8403	0.0855
3.38	3.45	28.7	Q9UK23|NAGPA_HUMAN	N-acetylglucosamine-1-phosphodiester alpha-N-acetylglucosaminidase precursor - Homo sapiens	1.0947	0.4469	0.7866	0.0464
5.4	5.44	19.9	Q3T906|GNPTA_HUMAN	N-acetylglucosamine-1-phosphotransferase subunits alpha/beta precursor - Homo sapiens	1.1089	0.0453	0.9425	0.2237
12.6	12.61	28.1	P15586|GNS_HUMAN	N-acetylglucosamine-6-sulfatase precursor - Homo sapiens	0.9391	0.4147	0.8562	0.0171
1.56	1.58	18.2	P59044|NALP6_HUMAN	NACHT, LRR and PYD domains-containing protein 6 - Homo sapiens
4.77	4.78	23.1	Q02083|ASAHL_HUMAN	N-acylethanolamine-hydrolyzing acid amidase precursor - Homo sapiens	1.0063	0.9065	0.9329	0.427
2	2.01	17.1	Q9NXA8|SIRT5_HUMAN	NAD-dependent deacetylase sirtuin-5 - Homo sapiens	0.9789		1.1898	0.5943
27.7	27.71	45.2	P23368|MAOM_HUMAN	NAD-dependent malic enzyme, mitochondrial precursor - Homo sapiens	1.0187	0.509	1.0083	0.8257
3.83	3.85	28.6	Q549M5|Q549M5_HUMAN	NADH dehydrogenase - Homo sapiens	0.9786	0.475	0.9782	0.6157
17.55	17.57	48.2	Q5VTW0|Q5VTW0_HUMAN	NADH dehydrogenase (Ubiquinone) Fe-S protein 2, 49kDa - Homo sapiens	0.7894	0.0015	0.7481	0
12.68	12.76	54.2	Q6IPW4|Q6IPW4_HUMAN	NADH dehydrogenase (Ubiquinone) flavoprotein 2, 24kDa - Homo sapiens	0.9399	0.4309	0.9619	0.0505
12.43	12.52	41.9	Q8WU60|Q8WU60_HUMAN	NADH dehydrogenase (Ubiquinone) flavoprotein 3, 10kDa - Homo sapiens	1.0032	0.9569	0.8758	0.0258
9.38	9.41	35.5	O95299|NDUAA_HUMAN	NADH dehydrogenase [ubiquinone] 1 alpha subcomplex subunit 10, mitochondrial precursor - Homo sapiens	0.8664	0.0616	0.8966	0.0389
4.61	4.85	27.6	Q9UI09|NDUAC_HUMAN	NADH dehydrogenase [ubiquinone] 1 alpha subcomplex subunit 12 - Homo sapiens	1.0533	0.3001	0.932	0.2889
4.54	4.54	45.1	Q9P0J0|NDUAD_HUMAN	NADH dehydrogenase [ubiquinone] 1 alpha subcomplex subunit 13 - Homo sapiens	0.9789	0.6584	0.969	0.461
6.18	6.29	53.5	O43678|NDUA2_HUMAN	NADH dehydrogenase [ubiquinone] 1 alpha subcomplex subunit 2 - Homo sapiens	0.9847	0.8119	0.9595	0.5155
7.49	7.49	46.9	O00483|NDUA4_HUMAN	NADH dehydrogenase [ubiquinone] 1 alpha subcomplex subunit 4 - Homo sapiens	1.0924	0.1591	0.9557	0.2795
7.35	7.4	38.4	P51970|NDUA8_HUMAN	NADH dehydrogenase [ubiquinone] 1 alpha subcomplex subunit 8 - Homo sapiens	0.9102	0.0038	1.0276	0.524
14.55	14.58	46.4	Q16795|NDUA9_HUMAN	NADH dehydrogenase [ubiquinone] 1 alpha subcomplex subunit 9, mitochondrial precursor - Homo sapiens	0.9765	0.6317	0.9638	0.391
2.12	2.12	51.7	O75438|NDUB1_HUMAN	NADH dehydrogenase [ubiquinone] 1 beta subcomplex subunit 1 - Homo sapiens	1.101	0.0401	1.1084	0.0482
14.19	14.19	50	O96000|NDUBA_HUMAN	NADH dehydrogenase [ubiquinone] 1 beta subcomplex subunit 10 - Homo sapiens	1.0105	0.8901	0.9769	0.7065
8.1	8.1	60.5	O95168|NDUB4_HUMAN	NADH dehydrogenase [ubiquinone] 1 beta subcomplex subunit 4 - Homo sapiens	1.0265	0.3786	0.9631	0.4048
2.4	2.4	36.5	O43674|NDUB5_HUMAN	NADH dehydrogenase [ubiquinone] 1 beta subcomplex subunit 5, mitochondrial precursor - Homo sapiens	0.8566	0.002	1.0027	0.9794
6.39	6.46	53.9	O95139|NDUB6_HUMAN	NADH dehydrogenase [ubiquinone] 1 beta subcomplex subunit 6 - Homo sapiens	1.0274	0.5358	1.0274	0.6707
3.7	3.7	30.6	O95169|NDUB8_HUMAN	NADH dehydrogenase [ubiquinone] 1 beta subcomplex subunit 8, mitochondrial precursor - Homo sapiens	1.2074	0.0178	1.0453	0.6403
11.56	11.56	53.1	Q9Y6M9|NDUB9_HUMAN	NADH dehydrogenase [ubiquinone] 1 beta subcomplex subunit 9 - Homo sapiens	1.0413	0.5142	0.8384	0.0066
11.41	11.41	61	O75489|NDUS3_HUMAN	NADH dehydrogenase [ubiquinone] iron-sulfur protein 3, mitochondrial precursor - Homo sapiens	1.0709	0.2218	0.8824	0.118
5.78	5.78	46.9	O43181|NDUS4_HUMAN	NADH dehydrogenase [ubiquinone] iron-sulfur protein 4, mitochondrial precursor - Homo sapiens	0.9444	0.5911	0.894	0.3841
11.53	11.53	66.2	Q7LD69|Q7LD69_HUMAN	NADH:ubiquinone oxidoreductase PSST subunit - Homo sapiens	0.9654	0.6535	0.9715	0.751
14.78	14.79	50.2	Q9UHQ9|NB5R1_HUMAN	NADH-cytochrome b5 reductase 1 - Homo sapiens	1.0601	0.2418	1.0007	0.9852
11.45	11.46	38.5	P00387|NB5R3_HUMAN	NADH-cytochrome b5 reductase 3 - Homo sapiens	0.9797	0.7276	1.046	0.2855
29.7	29.9	45.1	P28331|NDUS1_HUMAN	NADH-ubiquinone oxidoreductase 75 kDa subunit, mitochondrial precursor - Homo sapiens	0.8781	0.0064	0.832	0
2	2	29.6	A4ZN04|A4ZN04_HUMAN	NADH-ubiquinone oxidoreductase chain 3 - Homo sapiens
2.63	2.64	33.3	Q6FGG4|Q6FGG4_HUMAN	NDUFA3 protein - Homo sapiens	0.8828	0.2635	0.8909	0.2899
4.68	4.79	68	Q6FGW0|Q6FGW0_HUMAN	NDUFA6 protein (Fragment) - Homo sapiens	1.0466	0.4606	0.946	0.3118
9.88	9.88	57	Q32Q14|Q32Q14_HUMAN	NDUFA7 protein (Fragment) - Homo sapiens	1.0941	0.164	0.9958	0.9434
4.28	4.28	48	Q6IB80|Q6IB80_HUMAN	NDUFB3 protein - Homo sapiens	1.0493	0.5881	0.9318	0.1886
2.49	2.5	18.2	Q6ICN9|Q6ICN9_HUMAN	NDUFB7 protein (Fragment) - Homo sapiens	1.0332	0.4471	1.0671	0.1803
2.04	2.04	18.9	Q6IBA0|Q6IBA0_HUMAN	NDUFS5 protein - Homo sapiens	0.8487	0.2284	0.9814	0.7889
4.22	4.23	50.8	Q6IBC4|Q6IBC4_HUMAN	NDUFS6 protein - Homo sapiens	0.9901	0.8382	0.8625	0.0416
15.35	15.42	39.7	Q6IBR3|Q6IBR3_HUMAN	NDUFV1 protein - Homo sapiens	0.9629	0.2985	0.9991	0.9803
2.41	2.41	23.3	Q53Y03|Q53Y03_HUMAN	Neighbor of COX4 - Homo sapiens	1.0169	0.9204	1.1946	0.1557
2.47	3.85	17.4	Q8NF91|SYNE1_HUMAN	Nesprin-1 - Homo sapiens	1.0997	0.2768	1.1881	0.0471
17.05	17.07	31.3	P03483|NRAM_I72A2	Neuraminidase - Influenza A virus (strain A/Udorn/307/1972 H3N2)	1.8407	0	5.336	0
106.71	106.85	58.5	Q09666|AHNK_HUMAN	Neuroblast differentiation-associated protein AHNAK - Homo sapiens	1.9071	0	1.3314	0
5.91	5.95	27.8	Q9BYT8|NEUL_HUMAN	Neurolysin, mitochondrial precursor - Homo sapiens	0.9483	0.4258	0.8782	0.0625
8.25	8.25	45.6	Q7Z4X2|Q7Z4X2_HUMAN	Neuronal protein - Homo sapiens	1.049	0.3895	0.8631	0.3864
18.26	18.37	33.2	Q8IY17|PLPL6_HUMAN	Neuropathy target esterase - Homo sapiens	1.0677	0.4815	1.3425	0.0009
3.88	3.95	15.3	Q5T7F3|Q5T7F3_HUMAN	Neuropilin 1 - Homo sapiens	1.1673	0.2692	0.9038	0.3742
47.82	47.84	43.8	Q14697|GANAB_HUMAN	Neutral alpha-glucosidase AB precursor - Homo sapiens	0.8784	0.0005	1.064	0.0624
9.12	9.13	27.5	Q71UA6|Q71UA6_HUMAN	Neutral amino acid transporter - Homo sapiens	1.0267	0.7711	0.8286	0.1777
2	4.02	71.8	Q9UDI2|Q9UDI2_HUMAN	Neutrophil cytosolic factor 3; NCF-3 (Fragments) - Homo sapiens
2.39	2.39	28.1	Q6FHM6|Q6FHM6_HUMAN	NHP2L1 protein - Homo sapiens	0.7547	0.0632	0.9069	0.5249
15.76	15.77	36.2	Q969V3|NCLN_HUMAN	Nicalin precursor - Homo sapiens	0.7969	0	0.9734	0.5545
9.08	9.12	22.8	Q92542|NICA_HUMAN	Nicastrin precursor - Homo sapiens	0.936	0.181	0.9465	0.4391
61.82	61.82	54.9	Q2TB59|Q2TB59_HUMAN	Nicotinamide nucleotide transhydrogenase - Homo sapiens	0.9658	0.1045	0.9433	0.0278
14.46	14.67	19.1	Q59GR1|Q59GR1_HUMAN	Niemann-Pick disease, type C1 variant (Fragment) - Homo sapiens	0.9689	0.4581	0.9514	0.1731
3.97	4.01	32.2	Q9NQR4|NIT2_HUMAN	Nitrilase homolog 2 - Homo sapiens	1.0207	0.8709	1.0248	0.8266
19.36	19.48	25.4	P69849|NOMO3_HUMAN	Nodal modulator 3 precursor - Homo sapiens	0.9517	0.5218	1.0953	0.1375
4.01	4.09	18.2	Q96RL8|Q96RL8_HUMAN	NOGO-interacting mitochondrial protein - Homo sapiens	0.8246	0.2929	0.8051	0.2795
118.16	118.17	57.1	Q60FE2|Q60FE2_HUMAN	Non-muscle myosin heavy polypeptide 9 - Homo sapiens	1.195	0	1.6416	0
12.58	12.62	54.4	P03495|NS1_I72A2	Non-structural protein 1 - Influenza A virus (strain A/Udorn/307/1972 H3N2)	1.6935	0.002	5.8358	0
5.8	5.81	37.3	Q9C002|NMES1_HUMAN	Normal mucosa of esophagus-specific gene 1 protein - Homo sapiens	0.9727	0.8059	0.9199	0.3495
1.64	1.65	25.8	Q5TEF9|Q5TEF9_HUMAN	Novel enoyl-CoA hydratase/isomerase family protein (Fragment) - Homo sapiens	1.0811	0.6101	1.126	0.28
3.14	3.16	20	Q5JTA8|Q5JTA8_HUMAN	Novel protein - Homo sapiens	0.9282	0.2186	1.0802	0.0891
3.24	3.25	42.6	Q5JVH5|Q5JVH5_HUMAN	Novel protein similar to ribosomal protein 26 RPS26 - Homo sapiens	0.8074	0.1882	1.2774	0.1833
2	2.01	25	Q5T1D1|Q5T1D1_HUMAN	Novel protein similar to ribosomal protein L29 RPL29 (Fragment) - Homo sapiens
10.21	10.22	39.3	Q546Z2|Q546Z2_HUMAN	NS5ATP1 - Homo sapiens	1.062	0.4693	0.9752	0.7401
5.52	5.62	18.3	Q8TEM1|PO210_HUMAN	Nuclear pore membrane glycoprotein 210 precursor - Homo sapiens	0.8063	0.0226	0.8485	0.0396
8.04	8.04	33	P67809|YBOX1_HUMAN	Nuclease-sensitive element-binding protein 1 - Homo sapiens	1.0535	0.7046	1.283	0.2501
22.51	22.56	52.7	Q53GX6|Q53GX6_HUMAN	Nucleobindin 1 variant (Fragment) - Homo sapiens	1.2141	0	0.8996	0.0083
15.71	15.86	42	P19338|NUCL_HUMAN	Nucleolin - Homo sapiens	1.4889	0	1.1454	0.1015
5.32	5.33	32.3	P06748|NPM_HUMAN	Nucleophosmin - Homo sapiens	1.0422	0.5606	1.2971	0.0012
22.1	22.13	57.4	P06827|NCAP_I72A2	Nucleoprotein - Influenza A virus (strain A/Udorn/307/1972 H3N2)	1.2434	0.0022	5.0238	0
4.92	4.94	30.8	Q32Q12|Q32Q12_HUMAN	Nucleoside diphosphate kinase - Homo sapiens	2.2405	0.0651	2.1838	0.0771
2	4.93	31.1	Q86XQ2|Q86XQ2_HUMAN	Nucleoside diphosphate kinase - Homo sapiens	2.055		1.7466
4.2	4.23	38.6	Q9NUF9|Q9NUF9_HUMAN	Nucleoside diphosphate kinase (Fragment) - Homo sapiens	0.951	0.4977	0.8794	0.0983
2.72	2.72	45.7	Q53HM5|Q53HM5_HUMAN	Nucleoside diphosphate kinase (Fragment) - Homo sapiens	1.1875	0.3267	1.0296	0.8379
2.04	2.05	23.1	P53370|NUDT6_HUMAN	Nucleoside diphosphate-linked moiety X motif 6 - Homo sapiens	0.9048	0.7432	0.8097	0.2462
11.05	12.37	42.6	Q6IAV9|Q6IAV9_HUMAN	OAT protein - Homo sapiens	0.8774	0.0073	0.9608	0.4058
10.16	10.16	42	Q9NX40|OCAD1_HUMAN	OCIA domain-containing protein 1 - Homo sapiens	0.9429	0.2805	0.9691	0.2975
3.7	3.7	41.3	Q9H6K4|OPA3_HUMAN	Optic atrophy 3 protein - Homo sapiens	0.9555	0.2675	0.989	0.9586
4.71	4.74	24.3	Q6IBL2|Q6IBL2_HUMAN	OS-9 protein - Homo sapiens	0.9827	0.8534	1.0979	0.316
4.05	4.05	41.9	Q96B49|OBTP_HUMAN	Overexpressed breast tumor protein - Homo sapiens
5.61	5.64	47.1	Q9BUP3|HTAI2_HUMAN	Oxidoreductase HTATIP2 - Homo sapiens	0.9709	0.6315	0.9226	0.1882
2.68	2.68	18.9	Q96HP4|OXND1_HUMAN	Oxidoreductase NAD-binding domain-containing protein 1 precursor - Homo sapiens	1.0298	0.8104	0.9514	0.6916
28.24	28.33	42.1	A7BI36|A7BI36_HUMAN	p180/ribosome receptor - Homo sapiens	1.1733	0.0014	1.1962	0.0248
4.16	4.17	14.2	Q99571|P2RX4_HUMAN	P2X purinoceptor 4 - Homo sapiens	0.9765	0.6853	0.9896	0.8201
4.35	4.37	17.1	Q99572|P2RX7_HUMAN	P2X purinoceptor 7 - Homo sapiens	1.1056	0.5274	1.0966	0.4492
3.02	3.36	27.2	Q9UQ90|SPG7_HUMAN	Paraplegin - Homo sapiens	1.0087	0.8959	0.8545	0.206
11.57	11.58	23.9	Q540U8|Q540U8_HUMAN	PC cell-derived growth factor - Homo sapiens	0.7923	0.0695	0.6051	0.0746
51.68	51.68	61.4	Q6IB91|Q6IB91_HUMAN	PCK2 protein - Homo sapiens	1.0182	0.4371	0.8269	0
2.99	3.17	27.1	Q6NUS1|Q6NUS1_HUMAN	PDCD6IP protein - Homo sapiens	0.9854	0.8659	1.1227	0.267
4.18	4.2	22.3	Q6IBN4|Q6IBN4_HUMAN	PECI protein - Homo sapiens	0.799	0.0342	0.9507	0.3873
10.67	10.7	32.5	Q96EY7|PTCD3_HUMAN	Pentatricopeptide repeat-containing protein 3, mitochondrial precursor - Homo sapiens	0.9163	0.0664	0.9052	0.022
15.11	15.12	33.9	Q5SXM9|Q5SXM9_HUMAN	Peptidase (Mitochondrial processing) alpha - Homo sapiens	0.8693	0.0006	0.8417	0.0001
3.41	3.41	24.3	Q9UJ68|MSRA_HUMAN	Peptide methionine sulfoxide reductase - Homo sapiens	1.0945	0.2123	1.0716	0.2886
1.43	1.44	17.7	Q8N697|Q8N697_HUMAN	Peptide/histidine transporter - Homo sapiens	0.8269	0.5578	0.861	0.8052
21.61	21.62	62	A8K534|A8K534_HUMAN	Peptidyl-prolyl cis-trans isomerase - Homo sapiens	0.9912	0.6945	1.1856	0
4.89	5.33	65.2	Q71V99|Q71V99_HUMAN	Peptidyl-prolyl cis-trans isomerase - Homo sapiens	1.2126	0.0007	1.1305	0.006
4.4	4.55	33.1	Q53XJ5|Q53XJ5_HUMAN	Peptidyl-prolyl cis-trans isomerase - Homo sapiens	0.7915	0.1569	0.9684	0.7471
12.79	12.92	78.7	P30405|PPIF_HUMAN	Peptidyl-prolyl cis-trans isomerase, mitochondrial precursor - Homo sapiens	0.9857	0.5762	1.0382	0.0891
10.63	10.63	45.6	Q13850|Q13850_HUMAN	Peripheral benzodiazepine receptor - Homo sapiens	0.9288	0.1328	0.4491	0
11.05	11.05	50.8	Q06830|PRDX1_HUMAN	Peroxiredoxin-1 - Homo sapiens	1.9806	0.0001	1.6724	0.0003
2.64	6.92	25.1	Q13162|PRDX4_HUMAN	Peroxiredoxin-4 - Homo sapiens	0.9717	0.6509	1.0441	0.3222
15.63	15.68	64	P30044|PRDX5_HUMAN	Peroxiredoxin-5, mitochondrial precursor - Homo sapiens	1.0127	0.8878	0.9016	0.1177
15.15	15.16	45.8	Q53EK4|Q53EK4_HUMAN	Peroxisomal long-chain acyl-coA thioesterase variant (Fragment) - Homo sapiens	1.0507	0.1764	0.9321	0.0389
6.52	6.54	42.5	O96011|PX11B_HUMAN	Peroxisomal membrane protein 11B - Homo sapiens	0.8074	0.0242	0.9884	0.87
4.9	4.93	26.8	O75381|PEX14_HUMAN	Peroxisomal membrane protein PEX14 - Homo sapiens	0.9515	0.7172	1.0506	0.6156
43.79	43.79	53.5	P51659|DHB4_HUMAN	Peroxisomal multifunctional enzyme type 2 - Homo sapiens	0.9447	0.025	0.9833	0.4063
3.88	3.93	19.6	Q53GP4|Q53GP4_HUMAN	PET112-like variant (Fragment) - Homo sapiens	0.8395	0.1216	0.8877	0.2087
2.02	2.1	19.3	Q6FGP5|Q6FGP5_HUMAN	PEX3 protein (Fragment) - Homo sapiens	0.9453		1.1026
2.86	4.6	38.5	Q6IB11|Q6IB11_HUMAN	PGRMC1 protein - Homo sapiens	1.0221	0.8633	1.0631	0.4838
5.02	5.03	20.4	Q8TA85|Q8TA85_HUMAN	PGS1 protein (Fragment) - Homo sapiens	0.8402	0.1994	0.9257	0.3807
5.61	5.63	20.4	O95363|SYFM_HUMAN	Phenylalanyl-tRNA synthetase, mitochondrial precursor - Homo sapiens	0.84	0.1335	0.9341	0.4359
1.8	1.85	14.2	B1AKX0|B1AKX0_HUMAN	Phosphatase and actin regulator 3 - Homo sapiens	0.9968	0.9916	0.9461	0.8739
4.01	4.01	15.5	O95674|CDS2_HUMAN	Phosphatidate cytidylyltransferase 2 - Homo sapiens	0.862	0.6086	1.1973	0.5476
11.78	11.79	22.3	Q9NTJ5|SAC1_HUMAN	Phosphatidylinositide phosphatase SAC1 - Homo sapiens	1.0045	0.9427	1.0504	0.3506
17.45	17.5	43.8	Q9BTU6|P4K2A_HUMAN	Phosphatidylinositol 4-kinase type 2-alpha - Homo sapiens	0.8765	0.0105	0.8833	0.0311
2.01	2.04	20.7	P48426|PI42A_HUMAN	Phosphatidylinositol-5-phosphate 4-kinase type-2 alpha - Homo sapiens	1.385		1.0043
3.28	3.34	23.3	Q9UG56|PISD_HUMAN	Phosphatidylserine decarboxylase proenzyme - Homo sapiens	0.9127	0.0844	0.9312	0.299
1.44	1.5	28.1	P00558|PGK1_HUMAN	Phosphoglycerate kinase 1 - Homo sapiens	1.6088	0.0008	1.5509	0.0001
10.7	10.7	42.2	Q96HS1|PGAM5_HUMAN	Phosphoglycerate mutase family member 5 precursor - Homo sapiens	0.9085	0.113	0.8836	0.0059
1.68	2.12	15.9	Q59EA4|Q59EA4_HUMAN	Phospholipase D1 variant (Fragment) - Homo sapiens	0.9321	0.3642	0.9384	0.3714
12.16	12.17	34.9	Q8IV08|PLD3_HUMAN	Phospholipase D3 - Homo sapiens	0.9448	0.151	0.7067	0
2.77	2.88	18.4	Q4LE69|Q4LE69_HUMAN	PIK4CA variant protein (Fragment) - Homo sapiens	1.0236	0.8296	1.0976	0.4533
1.4	1.4	18.3	P53801|PTTG_HUMAN	Pituitary tumor-transforming gene 1 protein-interacting protein precursor - Homo sapiens	1.0423	0.5412	0.8446	0.4961
1.4	1.46	20.3	Q9BTY2|FUCO2_HUMAN	Plasma alpha-L-fucosidase precursor - Homo sapiens	1.0731	0.4206	0.988	0.8864
6.14	6.89	20.6	Q9Y646|PGCP_HUMAN	Plasma glutamate carboxypeptidase precursor - Homo sapiens	0.8208	0.2524	0.8359	0.108
15.68	15.71	27	P20020|AT2B1_HUMAN	Plasma membrane calcium-transporting ATPase 1 - Homo sapiens	1.1727	0.2071	1.2714	0.0497
53.75	54.34	42.6	Q6S377|Q6S377_HUMAN	Plectin 10 - Homo sapiens	1.1465	0.0099	1.2305	0
4.03	4.04	18.9	Q6UX71|PXDC2_HUMAN	Plexin domain-containing protein 2 precursor - Homo sapiens	1.0413	0.7907	0.7043	0.3399
7.08	7.49	24	O15031|PLXB2_HUMAN	Plexin-B2 precursor - Homo sapiens	1.1216	0.1932	0.988	0.8964
3.36	3.46	19.8	Q9NVV4|PAPD1_HUMAN	Poly(A) RNA polymerase, mitochondrial precursor - Homo sapiens	1.0328	0.4277	0.96	0.3251
4.21	4.24	29.5	Q9NX46|ARHL2_HUMAN	Poly(ADP-ribose) glycohydrolase ARH3 - Homo sapiens	0.8985	0.1939	0.8944	0.3203
2.17	2.39	19.3	O89752|PA_I97A1	Polymerase acidic protein - Influenza A virus (strain A/Hong Kong/156/1997 H5N1 genotype Gs/Gd)	1.3333		1.9694
5.39	5.77	39.9	Q9Y2S7|PDIP2_HUMAN	Polymerase delta-interacting protein 2 - Homo sapiens	1.0135	0.8379	0.8491	0.017
4.2	4.2	31.3	Q8IXK2|GLT12_HUMAN	Polypeptide N-acetylgalactosaminyltransferase 12 - Homo sapiens	0.9796	0.8276	0.9548	0.6011
8.35	8.36	27	Q10471|GALT2_HUMAN	Polypeptide N-acetylgalactosaminyltransferase 2 - Homo sapiens	1.0279	0.6845	1.0211	0.7631
18.29	18.38	40	Q8TCS8|PNPT1_HUMAN	Polyribonucleotide nucleotidyltransferase 1, mitochondrial precursor - Homo sapiens	1.0506	0.2705	1.0118	0.8257
2.83	2.85	12.4	Q6P1N1|Q6P1N1_HUMAN	PPM2C protein (Fragment) - Homo sapiens	1.1385	0.2454	0.9576	0.7017
13.39	13.5	45.8	Q6FGQ4|Q6FGQ4_HUMAN	PPT1 protein (Fragment) - Homo sapiens	0.8939	0.0063	0.7606	0
7.2	7.22	19.7	O75915|PRAF3_HUMAN	PRA1 family protein 3 - Homo sapiens	1.0378	0.741	1.458	0.0024
2.23	2.28	13.9	Q9UHG3|PCYOX_HUMAN	Prenylcysteine oxidase 1 precursor - Homo sapiens	1.0569	0.5803	1.3412	0.0589
2.02	2.06	10.6	B1AP22|B1AP22_HUMAN	Presenilin 2 - Homo sapiens	1.2689	0.185	1.0866	0.2762
2	2.01	7.1	Q9H300|PARL_HUMAN	Presenilins-associated rhomboid-like protein, mitochondrial precursor - Homo sapiens	0.8341	0.0931	0.7842	0.0058
43.01	43.06	43.5	Q5JRX3|PREP_HUMAN	Presequence protease, mitochondrial precursor - Homo sapiens	0.9869	0.6713	0.9628	0.268
6.47	6.59	24.9	Q3SY69|AL1L2_HUMAN	Probable 10-formyltetrahydrofolate dehydrogenase ALDH1L2 - Homo sapiens	0.9322	0.345	0.814	0.0051
17.22	17.23	34.3	Q5JTZ9|SYAM_HUMAN	Probable alanyl-tRNA synthetase, mitochondrial precursor - Homo sapiens	1.0139	0.8216	0.9147	0.0732
4.26	4.44	19	Q5T160|SYRM_HUMAN	Probable arginyl-tRNA synthetase, mitochondrial precursor - Homo sapiens	0.9731	0.5457	0.9496	0.5443
5.18	5.22	29.8	Q96I59|SYNM_HUMAN	Probable asparaginyl-tRNA synthetase, mitochondrial precursor - Homo sapiens	0.9519	0.5325	0.989	0.9127
2.93	2.96	28.9	Q9NUL7|DDX28_HUMAN	Probable ATP-dependent RNA helicase DDX28 - Homo sapiens	0.8314	0.0055	0.8408	0.1298
7.57	7.58	31.8	P17844|DDX5_HUMAN	Probable ATP-dependent RNA helicase DDX5 - Homo sapiens	1.0724	0.5642	1.3669	0.017
21.6	21.64	34.4	Q9HD20|AT131_HUMAN	Probable cation-transporting ATPase 13A1 - Homo sapiens	0.9934	0.8911	1.0749	0.2168
21.17	21.22	48.2	Q9HA77|SYCM_HUMAN	Probable cysteinyl-tRNA synthetase, mitochondrial precursor - Homo sapiens	0.9932	0.8321	0.9111	0.0021
8.81	8.81	25.4	Q86WU2|LDHD_HUMAN	Probable D-lactate dehydrogenase, mitochondrial precursor - Homo sapiens	0.855	0.0169	0.8586	0.0014
1.32	2.22	15.8	O95714|HERC2_HUMAN	Probable E3 ubiquitin-protein ligase HERC2 - Homo sapiens	0.9184	0.3283	0.9429	0.5236
1.7	1.7	11.4	Q9UKR5|ERG28_HUMAN	Probable ergosterol biosynthetic protein 28 - Homo sapiens	0.8481	0.0081	0.6503	0.0081
11.35	11.43	32	P49590|SYHM_HUMAN	Probable histidyl-tRNA synthetase, mitochondrial precursor - Homo sapiens	1.1068	0.0359	0.9818	0.7072
2.95	3.53	35.1	Q8N490|PNKD_HUMAN	Probable hydrolase PNKD - Homo sapiens	1.0424	0.5045	1.0527	0.6577
13.35	13.45	24.9	Q15031|SYLM_HUMAN	Probable leucyl-tRNA synthetase, mitochondrial precursor - Homo sapiens	0.9293	0.1114	0.9686	0.3884
2.59	2.6	42.1	Q86Y79|PTH_HUMAN	Probable peptidyl-tRNA hydrolase - Homo sapiens	1.0605	0.6038	0.9109	0.5038
11.36	11.39	35.7	Q8NBX0|SCPDH_HUMAN	Probable saccharopine dehydrogenase - Homo sapiens	0.957	0.4196	1.0396	0.5996
12.33	12.38	33.6	Q9H3G5|CPVL_HUMAN	Probable serine carboxypeptidase CPVL precursor - Homo sapiens	0.8985	0.0664	0.9487	0.2886
6.24	7.47	22.1	Q02809|PLOD1_HUMAN	Procollagen-lysine,2-oxoglutarate 5-dioxygenase 1 precursor - Homo sapiens	0.8486	0.1796	1.0184	0.8482
19.92	19.93	37.7	O60568|PLOD3_HUMAN	Procollagen-lysine,2-oxoglutarate 5-dioxygenase 3 precursor - Homo sapiens	0.9807	0.6537	1.05	0.2464
6.42	6.46	21	Q5VSQ6|Q5VSQ6_HUMAN	Procollagen-proline, 2-oxoglutarate 4-dioxygenase (Proline 4-hydroxylase), alpha polypeptide I - Homo sapiens	1.0303	0.6206	1.0773	0.3877
3.72	3.74	32.9	Q53Y44|Q53Y44_HUMAN	Profilin 1 - Homo sapiens	1.0123	0.9423	1.0547	0.7977
37.97	37.99	76.5	P35232|PHB_HUMAN	Prohibitin - Homo sapiens	0.9087	0.0107	0.9328	0.0045
35.64	37.65	87.3	Q99623|PHB2_HUMAN	Prohibitin-2 - Homo sapiens	0.9989	0.9677	1.0112	0.6291
5.22	5.24	27.8	Q9HCU5|PREB_HUMAN	Prolactin regulatory element-binding protein - Homo sapiens	0.7606	0.0415	0.8532	0.1631
3.62	3.65	20	O94903|PROSC_HUMAN	Proline synthetase co-transcribed bacterial homolog protein - Homo sapiens	0.8685	0.6818	0.842	0.7322
80.59	80.6	25.6	Q07954|LRP1_HUMAN	Prolow-density lipoprotein receptor-related protein 1 precursor - Homo sapiens	0.9784	0.2715	0.8173	0
6.66	6.66	20.2	Q32P28|P3H1_HUMAN	Prolyl 3-hydroxylase 1 precursor - Homo sapiens	0.9856	0.9182	1.2683	0.0188
10.95	10.95	42.4	Q59GV0|Q59GV0_HUMAN	Propionyl Coenzyme A carboxylase, beta polypeptide variant (Fragment) - Homo sapiens	0.8528	0.0754	0.8504	0.051
19.18	19.23	43.5	Q8WXQ7|Q8WXQ7_HUMAN	Propionyl-CoA carboxylase alpha subunit - Homo sapiens	0.8851	0.076	0.9824	0.858
34.49	34.53	43.5	B1AVU8|B1AVU8_HUMAN	Prosaposin - Homo sapiens	0.984	0.8015	0.9941	0.9368
15.28	15.28	51.5	Q9H7Z7|PGES2_HUMAN	Prostaglandin E synthase 2 - Homo sapiens	1.0703	0.3547	1.0366	0.3903
9.11	9.12	28	P23219|PGH1_HUMAN	Prostaglandin G/H synthase 1 precursor - Homo sapiens	0.9065	0.0936	1.033	0.7044
8.02	8.02	33	P55145|ARMET_HUMAN	Protein ARMET precursor - Homo sapiens	1.0176	0.83	1.133	0.0964
1.35	1.59	15.8	Q9UPA5|BSN_HUMAN	Protein bassoon - Homo sapiens	0.7207	0.1365	0.9612	0.7994
6.01	6.01	25.3	Q9Y2B0|CNPY2_HUMAN	Protein canopy homolog 2 precursor - Homo sapiens	1.0123	0.9376	1.1781	0.2768
4.51	4.52	35.6	Q9BT09|CNPY3_HUMAN	Protein canopy homolog 3 precursor - Homo sapiens	0.9444	0.6343	0.9339	0.5675
3.92	4.04	36.1	Q13948|CASP_HUMAN	Protein CASP - Homo sapiens	1.0927	0.2827	1.0924	0.1543
1.99	2.06	24.5	Q9P003|CNIH4_HUMAN	Protein cornichon homolog 4 - Homo sapiens
56.24	56.26	75	P30101|PDIA3_HUMAN	Protein disulfide-isomerase A3 precursor - Homo sapiens	0.9183	0.0005	1.1163	0
3.36	3.37	18.7	Q14554|PDIA5_HUMAN	Protein disulfide-isomerase A5 precursor - Homo sapiens	0.9601	0.5635	0.9995	0.9945
54.66	54.83	79.7	P07237|PDIA1_HUMAN	Protein disulfide-isomerase precursor - Homo sapiens	0.968	0.0795	1.183	0
7.58	7.77	34.8	Q96JJ7|TXD10_HUMAN	Protein disulfide-isomerase TXNDC10 precursor - Homo sapiens	1.0212	0.7983	1.0805	0.3106
10.04	10.04	82.5	Q99497|PARK7_HUMAN	Protein DJ-1 - Homo sapiens	1.0824	0.2151	0.9225	0.1343
1.71	1.71	28.3	Q9NX18|EMI5_HUMAN	Protein EMI5 homolog, mitochondrial precursor - Homo sapiens	0.9538		1.0077
2.12	2.12	18.8	Q9NUU6|F105A_HUMAN	Protein FAM105A - Homo sapiens	0.8905	0.0123	1.1338	0.0064
7.43	7.5	57.2	Q96C01|F136A_HUMAN	Protein FAM136A - Homo sapiens	0.9775	0.6306	0.8885	0.0164
2	2	28.5	Q9H2X8|FA14A_HUMAN	Protein FAM14A precursor - Homo sapiens	0.9178	0.4287	0.9334	0.4083
8.18	8.22	41.4	Q92520|FAM3C_HUMAN	Protein FAM3C precursor - Homo sapiens	1.0198	0.6963	1.0202	0.7322
1.95	2.01	20.4	Q9NUQ9|FA49B_HUMAN	Protein FAM49B - Homo sapiens	1.3597	0.0181	1.0036	0.9558
8.38	8.42	28.7	Q96DB5|FA82B_HUMAN	Protein FAM82B - Homo sapiens	0.9478	0.4464	0.766	0.0034
2.42	2.5	28.1	Q96TC7|FA82C_HUMAN	Protein FAM82C - Homo sapiens	1.0152	0.9202	0.9335	0.4592
3.17	3.32	18.6	Q8N5M9|JAGN1_HUMAN	Protein jagunal homolog 1 - Homo sapiens
2.99	3.13	23.1	Q86XJ6|Q86XJ6_HUMAN	Protein kinase C, delta - Homo sapiens	1.4482	0.0003	1.4587	0
2.01	2.08	14.3	Q9C0E8|LNP_HUMAN	Protein lunapark - Homo sapiens	1.2854	0.4699	1.7013	0.1659
9.89	9.94	22.9	Q86UE4|LYRIC_HUMAN	Protein LYRIC - Homo sapiens	1.1223	0.3686	0.9802	0.8844
2	2	24.7	Q9NQG1|MANBL_HUMAN	Protein MANBAL - Homo sapiens
2.32	3.45	23.9	Q9BPW8|NIPS1_HUMAN	Protein NipSnap homolog 1 - Homo sapiens	0.9846	0.7016	0.9512	0.2376
3.16	3.18	24.7	Q9UFN0|NPS3A_HUMAN	Protein NipSnap homolog 3A - Homo sapiens
1.73	1.73	11.2	Q5SWX8|ODR4_HUMAN	Protein ODR4 homolog - Homo sapiens	1.0555	0.8274	1.1887	0.4854
4.83	4.84	57.6	Q5XKP0|QIL1_HUMAN	Protein QIL1 - Homo sapiens	1.0678	0.1543	1.2031	0.0713
2.92	2.94	13.3	Q96AA3|RFT1_HUMAN	Protein RFT1 homolog - Homo sapiens	0.9193	0.3718	0.9965	0.9682
5.84	6	50.5	P60903|S10AA_HUMAN	Protein S100-A10 - Homo sapiens	2.035	0	1.3378	0
4.04	4.05	34.3	P31949|S10AB_HUMAN	Protein S100-A11 - Homo sapiens	3.1452	0	2.6198	0
4.35	4.35	39.6	P26447|S10A4_HUMAN	Protein S100-A4 - Homo sapiens	1.5269	0.001	2.3012	0
2.54	2.64	38.9	P06703|S10A6_HUMAN	Protein S100-A6 - Homo sapiens	1.1994	0.2117	1.4432	0.0051
4.27	4.3	37.6	P05109|S10A8_HUMAN	Protein S100-A8 - Homo sapiens	1.4451	0.0227	2.2983	0.0017
2	2.59	22.8	P06702|S10A9_HUMAN	Protein S100-A9 - Homo sapiens	2.7905	0.0347	5.3849	0.0134
1.7	1.93	18.8	Q9NVU7|SDA1_HUMAN	Protein SDA1 homolog - Homo sapiens
8.56	8.62	19.8	Q9UBV2|SE1L1_HUMAN	Protein sel-1 homolog 1 precursor - Homo sapiens	1.0301	0.5427	1.103	0.1356
3.12	3.12	24.1	Q9H2V7|SPNS1_HUMAN	Protein spinster homolog 1 - Homo sapiens	1.048	0.446	0.9591	0.4088
13.18	13.41	32.5	Q969Z0|TBRG4_HUMAN	Protein TBRG4 - Homo sapiens	1.1078	0.24	1.0296	0.4407
12.18	12.24	32.4	P61619|S61A1_HUMAN	Protein transport protein Sec61 subunit alpha isoform 1 - Homo sapiens	1.0098	0.7706	0.9741	0.6267
3.32	3.32	18.4	Q9C0H2|TTYH3_HUMAN	Protein tweety homolog 3 - Homo sapiens	0.9209	0.6004	0.8996	0.8005
2	2.12	19.9	Q9P035|PTAD1_HUMAN	Protein tyrosine phosphatase-like protein PTPLAD1 - Homo sapiens
11.74	11.74	32.3	O75695|XRP2_HUMAN	Protein XRP2 - Homo sapiens	1.2304	0.003	1.1424	0.006
1.4	1.4	15.4	Q9GZM5|YIPF3_HUMAN	Protein YIPF3 - Homo sapiens	0.8763	0.3121	0.6885	0.1501
1.7	1.7	5.1	Q969M3|YIPF5_HUMAN	Protein YIPF5 - Homo sapiens	0.9092	0.4156	1.1902	0.2348
2	2	11.9	Q96EC8|YIPF6_HUMAN	Protein YIPF6 - Homo sapiens	1.143		0.9677
1.8	1.8	14.5	P22061|PIMT_HUMAN	Protein-L-isoaspartate(D-aspartate) O-methyltransferase - Homo sapiens	0.835	0.4093	0.9328	0.7955
10.59	10.59	40.3	Q8WUK0|PTPM1_HUMAN	Protein-tyrosine phosphatase mitochondrial 1, mitochondrial precursor - Homo sapiens	1.0542	0.29	0.8716	0.0552
2	2.01	9.4	Q6Y1H2|Q6Y1H2_HUMAN	Protein-tyrosine phosphatase-like member B - Homo sapiens	1.0454	0.7282	1.1318	0.4836
2.33	2.33	26.8	O60704|TPST2_HUMAN	Protein-tyrosine sulfotransferase 2 - Homo sapiens	0.9507	0.4653	1.0099	0.9192
2.94	2.94	11.2	Q04941|PLP2_HUMAN	Proteolipid protein 2 - Homo sapiens
3.87	5.43	16.4	P09769|FGR_HUMAN	Proto-oncogene tyrosine-protein kinase FGR - Homo sapiens	1.3472	0.0019	1.3728	0.0229
3.38	3.4	23.3	Q5VTW8|Q5VTW8_HUMAN	Protoporphyrinogen oxidase - Homo sapiens	1.0534	0.4697	0.8508	0.2635
1.7	1.7	6.8	Q14242|SELPL_HUMAN	P-selectin glycoprotein ligand 1 precursor - Homo sapiens
2.03	2.08	23	Q6IBN0|Q6IBN0_HUMAN	PSMD3 protein - Homo sapiens	1.0308		1.0485
20.54	20.55	47.3	Q16740|CLPP_HUMAN	Putative ATP-dependent Clp protease proteolytic subunit, mitochondrial precursor - Homo sapiens	0.9489	0.3789	1.0183	0.7462
15.21	15.72	29.9	Q7L2E3|DHX30_HUMAN	Putative ATP-dependent RNA helicase DHX30 - Homo sapiens	1.0169	0.7679	1.0111	0.8375
2.2	2.25	15.4	O43824|GTPB6_HUMAN	Putative GTP-binding protein 6 - Homo sapiens	0.9485	0.8224	0.8763	0.4307
1.47	1.47	18.6	P58557|CU057_HUMAN	Putative metalloprotease C21orf57 - Homo sapiens	1.1484	0.0033	0.991	0.8882
3.76	3.76	22.1	Q96CB9|NSUN4_HUMAN	Putative methyltransferase NSUN4 - Homo sapiens	0.9543	0.5439	1.1154	0.338
8.94	8.99	23.6	Q8NHP8|PLBL2_HUMAN	Putative phospholipase B-like 2 precursor - Homo sapiens	0.9245	0.0724	0.8332	0.0159
2.7	2.7	25.5	Q53YB2|Q53YB2_HUMAN	Putative receptor protein - Homo sapiens	0.9218	0.1538	0.9855	0.8745
2.01	2.25	21.9	A6NJ78|ME5D1_HUMAN	Putative S-adenosyl-L-methionine-dependent methyltransferase METT5D1 - Homo sapiens
4.15	4.17	26	Q9HBR0|S38AA_HUMAN	Putative sodium-coupled neutral amino acid transporter 10 - Homo sapiens	0.9656	0.7978	0.9587	0.6862
2.99	2.99	31.7	Q5T440|CA069_HUMAN	Putative transferase C1orf69, mitochondrial precursor - Homo sapiens	1.001	0.9948	0.9766	0.8158
4.51	4.54	49.6	Q86Z22|Q86Z22_HUMAN	Putative uncharacterized protein - Homo sapiens	1.1229	0.1091	1.3454	0.0122
1.61	2.26	17.7	Q9Y520|Q9Y520_HUMAN	Putative uncharacterized protein - Homo sapiens	1.0685	0.7168	1.388	0.3554
12.86	12.86	52.7	Q8TBT6|Q8TBT6_HUMAN	Putative uncharacterized protein (Fragment) - Homo sapiens	0.9731	0.6346	0.9681	0.3976
7.88	7.94	16.8	Q59ED7|Q59ED7_HUMAN	Putative uncharacterized protein (Fragment) - Homo sapiens	1.1792	0.0319	1.3239	0
2	2	12.8	Q9UEL4|Q9UEL4_HUMAN	Putative uncharacterized protein (Fragment) - Homo sapiens	1.1624		1.8177
6.62	6.64	35.7	Q53R19|Q53R19_HUMAN	Putative uncharacterized protein ARPC2 - Homo sapiens	1.2268	0.0707	1.2063	0.0738
4.78	4.78	25.3	Q53SA7|Q53SA7_HUMAN	Putative uncharacterized protein CAPG - Homo sapiens	1.158	0.7495	1.2792	0.7533
3.86	3.86	19.2	Q9UFM8|Q9UFM8_HUMAN	Putative uncharacterized protein DKFZp566H1924 (Fragment) - Homo sapiens	1.0704	0.4518	1.1236	0.1612
14.78	14.82	37.5	Q9UFU8|Q9UFU8_HUMAN	Putative uncharacterized protein DKFZp586G1517 (Fragment) - Homo sapiens	1.0129	0.7862	0.9882	0.7798
2.01	2.21	59.2	Q5JPE2|Q5JPE2_HUMAN	Putative uncharacterized protein DKFZp667I093 - Homo sapiens
10.65	10.66	37.7	Q68CT7|Q68CT7_HUMAN	Putative uncharacterized protein DKFZp686G12159 - Homo sapiens	0.9024	0.083	0.9972	0.9642
4.53	4.53	23.3	Q5HYM5|Q5HYM5_HUMAN	Putative uncharacterized protein DKFZp686H10220 - Homo sapiens	0.9418	0.475	0.7941	0.004
1.41	1.57	19.6	Q6MZZ3|Q6MZZ3_HUMAN	Putative uncharacterized protein DKFZp686I0746 - Homo sapiens	1.0699	0.7632	0.864	0.529
17.31	17.32	68.5	Q5HYB6|Q5HYB6_HUMAN	Putative uncharacterized protein DKFZp686J1372 - Homo sapiens	1.7058	0.0004	2.0388	0.0005
2.48	9.29	26.4	Q7Z3S1|Q7Z3S1_HUMAN	Putative uncharacterized protein DKFZp686K08109 - Homo sapiens	0.9636	0.6159	0.9835	0.7955
5.34	5.41	31.3	Q7Z349|Q7Z349_HUMAN	Putative uncharacterized protein DKFZp686M22160 (Fragment) - Homo sapiens	1.0772	0.2852	0.9926	0.8785
11.09	13.12	25.1	Q6AI32|Q6AI32_HUMAN	Putative uncharacterized protein DKFZp781C13106 - Homo sapiens	1.0265	0.3011	0.7847	0
1.71	1.76	48.3	Q5H9R2|Q5H9R2_HUMAN	Putative uncharacterized protein DKFZp781K1356 - Homo sapiens	1.009	0.8788	0.9863	0.7839
50.09	50.24	59.1	Q549T6|Q549T6_HUMAN	Putative uncharacterized protein ERP70 - Homo sapiens	0.9422	0.022	1.1236	0
15.88	15.9	39.8	Q4ZFY5|Q4ZFY5_HUMAN	Putative uncharacterized protein MRPS5 - Homo sapiens	1.066	0.0969	0.9065	0.0369
23.49	23.53	67.7	Q53RC7|Q53RC7_HUMAN	Putative uncharacterized protein P5 - Homo sapiens	0.8767	0.0081	1.0532	0.1757
1.59	1.59	30.4	Q6UXU1|YC002_HUMAN	Putative uncharacterized protein UNQ6490/PRO21339 precursor - Homo sapiens
3.23	3.23	29.1	Q96C36|P5CR2_HUMAN	Pyrroline-5-carboxylate reductase 2 - Homo sapiens	1.0078	0.8718	0.8778	0.298
38.9	38.95	49.7	P11498|PYC_HUMAN	Pyruvate carboxylase, mitochondrial precursor - Homo sapiens	0.9436	0.0719	0.8936	0.0014
25	25.01	61.8	P11177|ODPB_HUMAN	Pyruvate dehydrogenase E1 component subunit beta, mitochondrial precursor - Homo sapiens	0.993	0.9074	0.9395	0.164
6.25	6.34	18	Q8NCN5|PDPR_HUMAN	Pyruvate dehydrogenase phosphatase regulatory subunit, mitochondrial precursor - Homo sapiens	1.0744	0.2158	1.0886	0.3153
20.05	20.92	44.7	O00330|ODPX_HUMAN	Pyruvate dehydrogenase protein X component, mitochondrial precursor - Homo sapiens	1.0102	0.8369	0.9958	0.9192
16.58	16.81	47.5	P14618|KPYM_HUMAN	Pyruvate kinase isozymes M1/M2 - Homo sapiens	1.4019	0.0002	1.5881	0
3.4	3.4	22.2	Q08257|QOR_HUMAN	Quinone oxidoreductase - Homo sapiens	0.9469	0.5726	0.8867	0.4792
3.18	3.25	18.5	Q6WKZ4|RFIP1_HUMAN	Rab11 family-interacting protein 1 - Homo sapiens	1.0525	0.2606	0.8993	0.3778
14.75	14.77	49.5	Q6FI42|Q6FI42_HUMAN	RAB11B protein - Homo sapiens	0.9976	0.936	1.0036	0.911
5.93	8.66	50.8	Q504R6|Q504R6_HUMAN	RAB13 protein (Fragment) - Homo sapiens	0.9897	0.8824	1.0922	0.5116
27.41	27.41	76.6	Q5U0I6|Q5U0I6_HUMAN	RAB1A, member RAS oncogene family - Homo sapiens	0.9851	0.8797	1.1385	0.0123
5.12	7.22	41.2	Q6IAS8|Q6IAS8_HUMAN	RAB27A protein - Homo sapiens	1.0213	0.8682	1.239	0.0081
5.24	8.19	50.7	Q6FI44|Q6FI44_HUMAN	RAB5A protein - Homo sapiens	1.0939	0.8416	1.2821	0.5398
12.35	12.53	49.5	Q6FH55|Q6FH55_HUMAN	RAB5C protein - Homo sapiens	0.9379	0.201	1.264	0.015
4.31	12.42	72.9	Q6FHV5|Q6FHV5_HUMAN	RAB8A protein - Homo sapiens	1.2256	0.0411	1.3216	0.0113
12.57	13.38	64.1	Q5U0C3|Q5U0C3_HUMAN	RAP1A, member of RAS oncogene family - Homo sapiens	1.1054	0.7528	1.1046	0.5153
29.08	29.34	35.5	P46940|IQGA1_HUMAN	Ras GTPase-activating-like protein IQGAP1 - Homo sapiens	1.7365	0	1.1523	0.0008
2.45	4.17	24.1	Q13576|IQGA2_HUMAN	Ras GTPase-activating-like protein IQGAP2 - Homo sapiens	1.0666	0.811	0.9441	0.8922
6.25	9.04	43	Q53HM4|Q53HM4_HUMAN	Ras homolog gene family, member A variant (Fragment) - Homo sapiens	1.456	0	1.5304	0
2.67	9.63	42.7	P63000|RAC1_HUMAN	Ras-related C3 botulinum toxin substrate 1 precursor - Homo sapiens	1.126	0.3927	0.8482	0.0045
8.58	9.98	45.3	P15153|RAC2_HUMAN	Ras-related C3 botulinum toxin substrate 2 precursor - Homo sapiens	1.2172	0.0006	1.3961	0
5.11	10.63	51.5	P61026|RAB10_HUMAN	Ras-related protein Rab-10 - Homo sapiens	1.0154	0.7122	1.0426	0.2983
4.76	7.42	48.4	P61106|RAB14_HUMAN	Ras-related protein Rab-14 - Homo sapiens	1.0897	0.5098	1.0707	0.5843
8.86	8.95	64.6	Q9NP72|RAB18_HUMAN	Ras-related protein Rab-18 - Homo sapiens	0.9274	0.1582	0.8865	0.1049
6.11	21.75	68.2	Q9H0U4|RAB1B_HUMAN	Ras-related protein Rab-1B - Homo sapiens	1.2788	0.0021	1.2759	0.0023
2.41	4.47	40	Q9UL25|RAB21_HUMAN	Ras-related protein Rab-21 - Homo sapiens	0.9511	0.3931	1.1611	0.3582
3.7	3.73	29.1	Q969Q5|RAB24_HUMAN	Ras-related protein Rab-24 - Homo sapiens	1.0377	0.7455	0.8318	0.2774
12.97	13.03	53.8	P61019|RAB2A_HUMAN	Ras-related protein Rab-2A - Homo sapiens	1.0009	0.9882	1.0127	0.8302
10.14	10.17	53.6	Q13636|RAB31_HUMAN	Ras-related protein Rab-31 - Homo sapiens	1.0709	0.322	1.0453	0.6195
3.56	3.61	44.9	Q13637|RAB32_HUMAN	Ras-related protein Rab-32 - Homo sapiens	1.0299	0.6046	1.0826	0.071
5.4	10.42	37.8	Q15286|RAB35_HUMAN	Ras-related protein Rab-35 - Homo sapiens	1.0786	0.3522	1.1207	0.0784
2.12	5.82	45.1	P61020|RAB5B_HUMAN	Ras-related protein Rab-5B - Homo sapiens	1.0247	0.6922	0.7368	0.3166
8.7	10.74	59.1	P20340|RAB6A_HUMAN	Ras-related protein Rab-6A - Homo sapiens	1.0993	0.0956	0.9783	0.7505
21.31	21.49	66.7	P51149|RAB7A_HUMAN	Ras-related protein Rab-7a - Homo sapiens	1.0069	0.8682	1.0677	0.041
7.3	12.72	69.6	Q92930|RAB8B_HUMAN	Ras-related protein Rab-8B - Homo sapiens	1.1479	0.119	1.103	0.0523
3.37	3.38	26.9	P51151|RAB9A_HUMAN	Ras-related protein Rab-9A - Homo sapiens	0.8218	0.1746	0.9912	0.8582
5.26	6.06	55.3	P11233|RALA_HUMAN	Ras-related protein Ral-A precursor - Homo sapiens	1.0517	0.2998	1.1819	0.0373
3.67	13.05	64.1	P61224|RAP1B_HUMAN	Ras-related protein Rap-1b precursor - Homo sapiens	1.2959	0.1693	1.2397	0.144
8.08	10.12	57.9	P61225|RAP2B_HUMAN	Ras-related protein Rap-2b precursor - Homo sapiens	1.2114	0.022	1.0355	0.5286
4.91	4.94	33.3	Q00765|REEP5_HUMAN	Receptor expression-enhancing protein 5 - Homo sapiens	1.082	0.2377	1.1855	0.0046
4.71	4.8	18.5	Q12913|PTPRJ_HUMAN	Receptor-type tyrosine-protein phosphatase eta precursor - Homo sapiens	1.1823	0.1046	1.1201	0.3906
4.25	4.27	22	O75787|RENR_HUMAN	Renin receptor precursor - Homo sapiens	0.8332	0.164	0.9134	0.2346
4.84	4.85	28.5	Q9P0H9|Q9P0H9_HUMAN	RER1 protein - Homo sapiens	1.0201	0.885	0.8693	0.008
3.63	3.64	15.5	Q53XN8|Q53XN8_HUMAN	Reticulocalbin 2, EF-hand calcium binding domain - Homo sapiens	0.9758	0.9327	1.0182	0.9697
6.81	6.86	23.9	Q15293|RCN1_HUMAN	Reticulocalbin-1 precursor - Homo sapiens	1.0332	0.4734	1.1397	0.0208
4.25	4.31	23.1	Q16799|RTN1_HUMAN	Reticulon-1 - Homo sapiens	1.0363	0.7887	1.0326	0.7403
2.02	3.73	12.9	O95197|RTN3_HUMAN	Reticulon-3 - Homo sapiens	0.9271	0.3392	1.3892	0.1852
14.91	14.99	20.8	Q9NQC3|RTN4_HUMAN	Reticulon-4 - Homo sapiens	1.1392	0.2907	1.2484	0.0183
13.36	13.37	36.9	Q9HB40|RISC_HUMAN	Retinoid-inducible serine carboxypeptidase precursor - Homo sapiens	1.0665	0.2406	0.8429	0.0052
11.09	11.1	32.7	Q8TC12|RDH11_HUMAN	Retinol dehydrogenase 11 - Homo sapiens	1.0958	0.4833	1.2725	0.0242
4.76	4.92	37.8	Q8NBN7|RDH13_HUMAN	Retinol dehydrogenase 13 - Homo sapiens	1.1027	0.2081	0.976	0.8375
5.56	5.69	44.9	Q9HBH5|RDH14_HUMAN	Retinol dehydrogenase 14 - Homo sapiens	0.8895	0.383	0.867	0.0904
4.97	5.02	24.2	Q8N5I0|Q8N5I0_HUMAN	RFTN1 protein (Fragment) - Homo sapiens	1.0762	0.3868	1.2828	0.1087
2.07	2.09	22.1	Q6I9S5|Q6I9S5_HUMAN	RGS19 protein - Homo sapiens	1.2978	0.211	1.1318	0.392
3.06	3.19	25.9	P52566|GDIR2_HUMAN	Rho GDP-dissociation inhibitor 2 - Homo sapiens	1.5036	0.1252	2.0785	0.0653
2.04	2.05	23.4	Q6NTF9|RHBD2_HUMAN	Rhomboid domain-containing protein 2 - Homo sapiens	0.9895	0.9115	0.8151	0.0283
3.51	3.51	26.4	A6XND5|A6XND5_HUMAN	Ribonuclease T2 - Homo sapiens	1.0118	0.8989	0.9031	0.4278
48.96	48.96	58	Q53EP4|Q53EP4_HUMAN	Ribophorin I variant (Fragment) - Homo sapiens	0.9155	0.0006	1.1275	0
4.14	4.14	30.4	Q5HY50|Q5HY50_HUMAN	Ribosomal protein L10 (Fragment) - Homo sapiens	1.2522	0.2715	1.9116	0.0005
5.34	5.36	59.4	Q59FI9|Q59FI9_HUMAN	Ribosomal protein L12 variant (Fragment) - Homo sapiens	1.1888	0.1603	1.2599	0.0528
2.17	2.17	48.3	Q642I1|Q642I1_HUMAN	Ribosomal protein L15 - Homo sapiens	1.2777	0.0397	1.3278	0.0769
8.73	8.75	34.3	Q59GX9|Q59GX9_HUMAN	Ribosomal protein L5 variant (Fragment) - Homo sapiens	1.5775	0	1.0566	0.1181
4.97	5.11	37.6	Q5T8U4|Q5T8U4_HUMAN	Ribosomal protein L7a - Homo sapiens	1.1379	0.087	1.3912	0.0232
2.04	2.04	43.4	Q5SUJ3|Q5SUJ3_HUMAN	Ribosomal protein S18 - Homo sapiens	1.2626	0.0878	1.5037	0.1491
3.4	3.41	45.2	Q8WVX7|Q8WVX7_HUMAN	Ribosomal protein S19 (Fragment) - Homo sapiens	1.2774	0.2077	1.3751	0.1493
4.08	4.09	53.9	Q6IPX5|Q6IPX5_HUMAN	Ribosomal protein S2 - Homo sapiens	0.8457	0.0972	1.2045	0.061
2.01	2.04	15.9	Q49A11|Q49A11_HUMAN	Ribosomal protein S27 - Homo sapiens	1.4601	0.2758	1.5793	0.265
1.87	1.99	41.2	Q53G83|Q53G83_HUMAN	Ribosomal protein S3 variant (Fragment) - Homo sapiens	1.2131	0.1072	1.3324	0.1339
3.39	3.39	33.5	Q53HV1|Q53HV1_HUMAN	Ribosomal protein S4, X-linked X isoform variant (Fragment) - Homo sapiens	0.8155	0.0004	1.3832	0
3.13	3.38	34.5	Q96DV6|Q96DV6_HUMAN	Ribosomal protein S6 - Homo sapiens	1.0335	0.6809	1.3671	0.3143
8.47	8.55	41.2	Q96E11|RRFM_HUMAN	Ribosome recycling factor, mitochondrial precursor - Homo sapiens	1.0037	0.9524	0.9697	0.6527
1.71	1.73	14	Q5M7Z0|PTD16_HUMAN	RING finger and transmembrane domain-containing protein PTD016 - Homo sapiens	1.7047		1.5379
15.45	15.56	42.1	Q7L0Y3|RG9D1_HUMAN	RNA (guanine-9-)-methyltransferase domain-containing protein 1, mitochondrial precursor - Homo sapiens	0.9439	0.0984	0.8875	0.0455
7.44	7.52	31	Q9HC36|RMTL1_HUMAN	RNA methyltransferase-like protein 1 - Homo sapiens	1.0437	0.2725	0.9023	0.0188
2.09	2.11	16.3	Q6IBJ9|Q6IBJ9_HUMAN	RNF13 protein - Homo sapiens
6.41	6.41	39.3	Q6FHT8|Q6FHT8_HUMAN	RNP24 protein - Homo sapiens	0.8434	0.0013	0.9757	0.6121
2.23	2.25	34.4	Q6IAX2|Q6IAX2_HUMAN	RPL21 protein - Homo sapiens	2.3377	0.1262	1.5113	0.1075
2.27	2.28	33.1	Q6IBH6|Q6IBH6_HUMAN	RPL26 protein - Homo sapiens	1.7523	0.1244	1.2651	0.3648
2	2	19.8	Q6IRZ0|Q6IRZ0_HUMAN	RPL31 protein - Homo sapiens	1.3985	0.0496	1.4665	0.0508
19.49	19.49	38.4	Q3KQU0|Q3KQU0_HUMAN	RPL7 protein - Homo sapiens	1.1786	0.0008	1.2185	0.0001
14.17	14.17	72.2	Q6FG96|Q6FG96_HUMAN	RPLP2 protein - Homo sapiens	1.1611	0.0449	1.3292	0
8.57	8.57	61	Q6FH12|Q6FH12_HUMAN	RRAS protein - Homo sapiens	1.0149	0.8763	1.0744	0.5409
2.81	2.85	22.8	Q9Y3Z3|SAMH1_HUMAN	SAM domain and HD domain-containing protein 1 - Homo sapiens	1.1997	0.0468	1.3515	0.006
44.43	44.53	39.3	P16615|AT2A2_HUMAN	Sarcoplasmic/endoplasmic reticulum calcium ATPase 2 - Homo sapiens	0.9518	0.1155	1.1212	0.0008
7.24	7.24	30.4	Q6IBK3|Q6IBK3_HUMAN	SCAMP2 protein - Homo sapiens	1.0668	0.5674	0.9803	0.872
12.1	12.18	28.2	Q53Y63|Q53Y63_HUMAN	Scavenger receptor class B, member 2 - Homo sapiens	0.9837	0.8114	1.0318	0.6025
4.75	4.75	13.1	Q86VB7|C163A_HUMAN	Scavenger receptor cysteine-rich type 1 protein M130 precursor - Homo sapiens	1.0152	0.817	0.809	0.0305
8.33	8.36	31.9	O75880|SCO1_HUMAN	SCO1 protein homolog, mitochondrial precursor - Homo sapiens	0.9977	0.969	0.9712	0.5517
6.12	6.13	41	O43819|SCO2_HUMAN	SCO2 protein homolog, mitochondrial precursor - Homo sapiens	0.8637	0.2061	0.9002	0.4502
2.08	2.08	7.4	Q969E2|SCAM4_HUMAN	Secretory carrier-associated membrane protein 4 - Homo sapiens	1.0372	0.5826	0.908	0.4744
1.65	1.68	23.9	Q9NZV5|SELN_HUMAN	Selenoprotein N precursor - Homo sapiens
6.33	6.44	66.3	P35270|SPRE_HUMAN	Sepiapterin reductase - Homo sapiens	1	1	0.9621	0.5016
24.77	24.78	39.5	P83111|LACTB_HUMAN	Serine beta-lactamase-like protein LACTB, mitochondrial precursor - Homo sapiens	0.9308	0.0119	0.8631	0
39.07	39.12	69.4	Q53ET4|Q53ET4_HUMAN	Serine hydroxymethyltransferase (Fragment) - Homo sapiens	0.9513	0.1903	0.9584	0.0711
2.01	2.01	8.2	Q9NRX5|SERC1_HUMAN	Serine incorporator 1 - Homo sapiens
3.93	3.94	20.7	O15269|SPTC1_HUMAN	Serine palmitoyltransferase 1 - Homo sapiens	0.9168	0.4438	1.1069	0.1913
2.52	3.01	29.9	O43464|HTRA2_HUMAN	Serine protease HTRA2, mitochondrial precursor - Homo sapiens	0.8984	0.0773	0.9941	0.976
2.27	2.27	17.3	P62136|PP1A_HUMAN	Serine/threonine-protein phosphatase PP1-alpha catalytic subunit - Homo sapiens	1.8132	0.0562	1.3481	0.0322
4.1	4.11	19.9	P50454|SERPH_HUMAN	Serpin H1 precursor - Homo sapiens	1.1257	0.2799	1.0847	0.5692
22.34	22.36	38.3	P02768|ALBU_HUMAN	Serum albumin precursor - Homo sapiens	1.3591	0	1.4363	0
5.13	5.19	38	Q9NP81|SYSM_HUMAN	Seryl-tRNA synthetase, mitochondrial precursor - Homo sapiens	0.9219	0.3161	0.9376	0.6146
2.09	2.09	12	Q9BU04|Q9BU04_HUMAN	Ses2 protein (Fragment) - Homo sapiens	1.1976	0.831	0.8578	0.7767
18.42	18.49	52.2	P16219|ACADS_HUMAN	Short-chain specific acyl-CoA dehydrogenase, mitochondrial precursor - Homo sapiens	0.9813	0.7439	0.9372	0.4712
4.23	4.24	15.5	Q9HAT2|SIAE_HUMAN	Sialate O-acetylesterase precursor - Homo sapiens	1.0844	0.7991	0.995	0.9463
6.05	6.05	15.4	Q9Y286|SIGL7_HUMAN	Sialic acid-binding Ig-like lectin 7 precursor - Homo sapiens
4.07	4.08	16.4	Q9Y336|SIGL9_HUMAN	Sialic acid-binding Ig-like lectin 9 precursor - Homo sapiens	0.9782		0.8139
2.93	2.93	14.9	Q99519|NEUR1_HUMAN	Sialidase-1 precursor - Homo sapiens	1	1	0.8843	0.1626
1.47	1.5	18.8	Q9NRA2|S17A5_HUMAN	Sialin - Homo sapiens	1.0481	0.6223	0.9854	0.8216
15.4	21.77	59.6	Q9H9B4|SFXN1_HUMAN	Sideroflexin-1 - Homo sapiens	0.9242	0.2507	0.8903	0.0239
4.97	6.64	43.5	Q96NB2|SFXN2_HUMAN	Sideroflexin-2 - Homo sapiens	0.9848	0.9107	0.9571	0.572
29.68	29.69	60.7	Q9BWM7|SFXN3_HUMAN	Sideroflexin-3 - Homo sapiens	1.0211	0.6383	0.8528	0.0102
6.34	6.35	35	Q6P4A7|SFXN4_HUMAN	Sideroflexin-4 - Homo sapiens	1.0081	0.9519	1.0844	0.4087
4.37	4.37	32.1	Q8TD22|SFXN5_HUMAN	Sideroflexin-5 - Homo sapiens	0.9806	0.7581	0.9356	0.6254
1.64	1.72	13.6	Q24JR2|Q24JR2_HUMAN	SIDT2 protein - Homo sapiens	0.9707	0.5565	0.9441	0.291
2	2	15.7	Q9Y6A9|SPCS1_HUMAN	Signal peptidase complex subunit 1 - Homo sapiens	1.1732	0.064	1.031	0.089
5.24	5.25	31.4	Q15005|SPCS2_HUMAN	Signal peptidase complex subunit 2 - Homo sapiens	0.9821	0.7286	1.1504	0.0004
2.03	2.03	27.8	P61009|SPCS3_HUMAN	Signal peptidase complex subunit 3 - Homo sapiens	0.7949	0.1892	1.167	0.3175
9.38	9.88	39.1	Q9Y5M8|SRPRB_HUMAN	Signal recognition particle receptor subunit beta - Homo sapiens	0.9618	0.4837	1.0584	0.2541
16.78	16.8	38.2	A2A2E1|A2A2E1_HUMAN	Signal-regulatory protein alpha - Homo sapiens	1.2053	0.0781	0.9812	0.8547
35.46	35.54	50.6	Q8TA92|Q8TA92_HUMAN	Similar to AFG3 ATPase family gene 3-like 2 (Fragment) - Homo sapiens	1.0235	0.504	0.9482	0.3336
2.58	2.59	61.3	Q9BS10|Q9BS10_HUMAN	Similar to ribosomal protein S8 (Fragment) - Homo sapiens	0.9701	0.9457	1.3767	0.5612
5	5	30.6	Q6P2Q7|Q6P2Q7_HUMAN	Similar to RIKEN cDNA C030006K11 gene - Homo sapiens	1.0232	0.8905	0.9524	0.5903
2	2	28.9	Q8WVW9|Q8WVW9_HUMAN	Similar to signal recognition particle 9kD (Fragment) - Homo sapiens	1.2407		1.4899
13.38	13.39	73.6	Q04837|SSB_HUMAN	Single-stranded DNA-binding protein, mitochondrial precursor - Homo sapiens	0.9269	0.0355	0.8298	0
5.18	5.18	20.9	Q9UIB8|SLAF5_HUMAN	SLAM family member 5 precursor - Homo sapiens	1.2097	0.0002	0.9744	0.6108
31.06	31.06	72.9	Q6IBH0|Q6IBH0_HUMAN	SLC25A11 protein - Homo sapiens	0.9247	0.0772	0.9135	0.0441
7.04	7.14	21.9	Q8TAG3|Q8TAG3_HUMAN	SLC4A2 protein - Homo sapiens	1.2339	0.0405	1.068	0.8303
2.91	3.03	16.4	Q8NCG7|DGLB_HUMAN	Sn1-specific diacylglycerol lipase beta - Homo sapiens	0.9092	0.4631	1.0255	0.7684
2.12	2.12	66.2	Q5SXU8|Q5SXU8_HUMAN	SNAP-associated protein - Homo sapiens	1.1613	0.722	0.9891	0.9801
3.27	3.37	19.3	Q96T83|SL9A7_HUMAN	Sodium/hydrogen exchanger 7 - Homo sapiens	1.0144	0.9481	1.0438	0.721
64.72	64.72	51.9	P05023|AT1A1_HUMAN	Sodium/potassium-transporting ATPase subunit alpha-1 precursor - Homo sapiens	1.016	0.5909	1.083	0.0028
15.36	15.38	38.4	P54709|AT1B3_HUMAN	Sodium/potassium-transporting ATPase subunit beta-3 - Homo sapiens	0.9863	0.7532	1.1269	0.0074
7.49	7.64	17.7	Q9UHW9|S12A6_HUMAN	Solute carrier family 12 member 6 - Homo sapiens	1.0929	0.4112	1.0216	0.8012
1.41	1.56	18.5	Q9Y666|S12A7_HUMAN	Solute carrier family 12 member 7 - Homo sapiens	1.0369	0.7671	0.9685	0.6323
3.12	3.16	15.8	Q5T8R6|Q5T8R6_HUMAN	Solute carrier family 16, member 1 - Homo sapiens	1.0781	0.6919	1.1637	0.382
4.1	4.14	17.9	P11169|GTR3_HUMAN	Solute carrier family 2, facilitated glucose transporter member 3 - Homo sapiens	1.0622	0.4388	0.9745	0.753
2.41	2.44	21.9	Q9UGQ3|GTR6_HUMAN	Solute carrier family 2, facilitated glucose transporter member 6 - Homo sapiens	0.9805	0.9283	0.8389	0.0917
3.39	3.39	16.2	Q96BI1|S22AI_HUMAN	Solute carrier family 22 member 18 - Homo sapiens	0.9356	0.5372	1.0578	0.5359
8.27	20.39	42.3	Q96AM8|Q96AM8_HUMAN	Solute carrier family 25 (Mitochondrial carrier, Aralar), member 12 - Homo sapiens	0.8969	0.1145	0.9659	0.6136
2.51	2.55	19.7	Q3KQZ1|S2535_HUMAN	Solute carrier family 25 member 35 - Homo sapiens	0.8203	0.3048	0.76	0.1426
2.95	3.15	19.8	Q8TBP6|S2540_HUMAN	Solute carrier family 25 member 40 - Homo sapiens	0.9692	0.6509	0.8139	0.0578
2.83	2.83	10	Q96AG3|S2546_HUMAN	Solute carrier family 25 member 46 - Homo sapiens	0.8602	0.1948	0.8402	0.343
2.25	2.26	9.4	Q9HAS3|S28A3_HUMAN	Solute carrier family 28 member 3 - Homo sapiens	1.1386	0.452	0.5832	0.2528
1.71	1.74	17.6	Q96K37|S35E1_HUMAN	Solute carrier family 35 member E1 - Homo sapiens
2	2.02	12.8	Q59GD7|Q59GD7_HUMAN	Solute carrier family 6 (Neurotransmitter transporter, taurine), member 6 variant (Fragment) - Homo sapiens	0.9692	0.6876	0.8476	0.1889
3.64	3.65	14.8	Q8IV97|Q8IV97_HUMAN	Solute carrier family 7 (Cationic amino acid transporter, y+ system), member 5 - Homo sapiens	1.1634	0.7211	0.9077	0.7343
11.39	11.44	26.7	Q99523|SORT_HUMAN	Sortilin precursor - Homo sapiens	0.7941	0.0006	0.7641	0
18.26	18.34	37.7	Q9Y512|SAM50_HUMAN	Sorting and assembly machinery component 50 homolog - Homo sapiens	0.9459	0.2206	1.0678	0.0158
2.32	2.34	10.9	Q6IBK4|Q6IBK4_HUMAN	SPARC protein - Homo sapiens	0.7821	0.0017	0.9014	0.2776
2.97	3.14	13.4	Q96JI7|SPTCS_HUMAN	Spatacsin - Homo sapiens	0.9422	0.3241	0.9279	0.6651
6.23	6.23	42.5	Q6IAM7|Q6IAM7_HUMAN	SPC18 protein - Homo sapiens	0.9801	0.8074	0.9643	0.4742
2.09	2.12	15.8	Q8TB22|SPT20_HUMAN	Spermatogenesis-associated protein 20 precursor - Homo sapiens	0.9353	0.5149	1.0051	0.9309
3.18	3.25	22.9	O95470|SGPL1_HUMAN	Sphingosine-1-phosphate lyase 1 - Homo sapiens	1.0164	0.7966	1.1315	0.1228
1.9	1.9	40.9	P84103|SFRS3_HUMAN	Splicing factor, arginine/serine-rich 3 - Homo sapiens	0.9032	0.2722	1.5478	0.0362
4.47	4.48	34.3	Q8WW59|SPRY4_HUMAN	SPRY domain-containing protein 4 - Homo sapiens	1.1222	0.2781	1.2559	0.1099
10.27	10.27	78.9	Q9GZT3|SLIRP_HUMAN	SRA stem-loop-interacting RNA-binding protein, mitochondrial precursor - Homo sapiens	0.9431	0.0643	1.0078	0.7963
6.04	6.14	17.6	Q6IAX9|Q6IAX9_HUMAN	SRPR protein - Homo sapiens	1.0142	0.8007	1.2869	0.0002
8.03	8.06	31.8	Q7KZF4|SND1_HUMAN	Staphylococcal nuclease domain-containing protein 1 - Homo sapiens	1.6454	0.0011	1.2405	0.0146
29.72	29.76	38.2	Q5VVZ1|Q5VVZ1_HUMAN	Sterol carrier protein 2 - Homo sapiens	1.0309	0.2675	1.008	0.8177
11.99	12.02	23.8	P35610|SOAT1_HUMAN	Sterol O-acyltransferase 1 - Homo sapiens	0.9093	0.3246	1.115	0.199
7.1	7.17	33.8	Q15738|NSDHL_HUMAN	Sterol-4-alpha-carboxylate 3-dehydrogenase, decarboxylating - Homo sapiens	0.9937	0.9163	1.2154	0.0034
16.95	16.96	60.7	Q9UJZ1|STML2_HUMAN	Stomatin-like protein 2 - Homo sapiens	1.096	0.0908	0.9525	0.3001
2.11	2.11	25.1	Q99470|SDF2_HUMAN	Stromal cell-derived factor 2 precursor - Homo sapiens	0.7934	0.0379	0.9	0.2911
4.22	4.38	16.8	Q8N382|Q8N382_HUMAN	Stromal interaction molecule 1 - Homo sapiens	1.1879	0.0089	1.2926	0.0036
38.18	38.19	50.3	P31040|DHSA_HUMAN	Succinate dehydrogenase [ubiquinone] flavoprotein subunit, mitochondrial precursor - Homo sapiens	1.0042	0.9048	0.9854	0.6291
25.85	25.96	66.1	P21912|DHSB_HUMAN	Succinate dehydrogenase [ubiquinone] iron-sulfur subunit, mitochondrial precursor - Homo sapiens	1.0415	0.3755	0.9622	0.1974
4.66	4.66	34.3	Q99643|C560_HUMAN	Succinate dehydrogenase cytochrome b560 subunit, mitochondrial precursor - Homo sapiens	1.1925	0.1891	1.3701	0.1114
11.83	11.9	30.5	Q546H9|Q546H9_HUMAN	Succinic semialdehyde dehydrogenase precursor - Homo sapiens	0.9512	0.6787	0.9003	0.036
22.26	22.37	38.4	Q9P2R7|SUCB1_HUMAN	Succinyl-CoA ligase [ADP-forming] beta-chain, mitochondrial precursor - Homo sapiens	1.1162	0.0021	0.9834	0.7031
33.35	33.4	58.8	Q96I99|SUCB2_HUMAN	Succinyl-CoA ligase [GDP-forming] beta-chain, mitochondrial precursor - Homo sapiens	1.2556	0	1.068	0.0496
13.7	13.75	41.2	P55809|SCOT_HUMAN	Succinyl-CoA:3-ketoacid-coenzyme A transferase 1, mitochondrial precursor - Homo sapiens	1.0571	0.1328	1.0841	0.027
13.72	13.75	41.7	Q6IAL5|Q6IAL5_HUMAN	SUCLG1 protein - Homo sapiens	1.0585	0.2942	1.0595	0.2656
3.51	3.51	11.4	Q8TED4|SPX2_HUMAN	Sugar phosphate exchanger 2 - Homo sapiens	0.8855	0.1382	1.2312	0.0075
2.02	2.03	17.6	Q8NBK3|SUMF1_HUMAN	Sulfatase-modifying factor 1 precursor - Homo sapiens	0.9862	0.8937	1.0747	0.5499
10.07	10.07	44.2	Q8NBJ7|SUMF2_HUMAN	Sulfatase-modifying factor 2 precursor - Homo sapiens	0.8216	0.1294	1.0068	0.9313
66.25	66.25	75.1	Q9Y6N5|SQRD_HUMAN	Sulfide:quinone oxidoreductase, mitochondrial precursor - Homo sapiens	0.9399	0.016	0.9857	0.5624
2.03	2.04	44.8	Q6NR85|Q6NR85_HUMAN	Superoxide dismutase [Cu-Zn] - Homo sapiens	0.9107	0.1662	1.1391	0.4036
7.16	7.36	42.3	P04179|SODM_HUMAN	Superoxide dismutase [Mn], mitochondrial precursor - Homo sapiens	1.073	0.015	1.2006	0
7.45	7.45	55	Q5T8T3|Q5T8T3_HUMAN	Surfeit 1 - Homo sapiens	0.9778	0.7205	0.8369	0.0182
2.08	2.09	26.6	Q5T8U7|Q5T8U7_HUMAN	Surfeit 4 - Homo sapiens	1.0252	0.7054	1.2738	0.3054
4.69	4.72	26.6	Q9NZ01|GPSN2_HUMAN	Synaptic glycoprotein SC2 - Homo sapiens	0.8928	0.087	1.0555	0.366
19.1	19.11	54.2	Q99536|VAT1_HUMAN	Synaptic vesicle membrane protein VAT-1 homolog - Homo sapiens	1.022	0.7285	1.0526	0.4277
2.89	2.89	18.9	O43759|SNG1_HUMAN	Synaptogyrin-1 - Homo sapiens	0.7136		0.4429
4.6	4.6	28.1	O43760|SNG2_HUMAN	Synaptogyrin-2 - Homo sapiens	0.8495	0.1119	0.7848	0.0063
2.06	2.06	20.8	Q16563|SYPL1_HUMAN	Synaptophysin-like protein 1 - Homo sapiens	0.9058	0.1467	1.0033	0.967
4.51	4.54	43.6	O00161|SNP23_HUMAN	Synaptosomal-associated protein 23 - Homo sapiens	1.0113	0.9087	1.0431	0.7245
4.03	4.04	33.3	O95721|SNP29_HUMAN	Synaptosomal-associated protein 29 - Homo sapiens	1.2495	0.3986	0.8994	0.828
2.67	2.71	29.1	Q53YE2|Q53YE2_HUMAN	Syntaxin 3A - Homo sapiens	1.035	0.6435	1.0438	0.6903
13.01	13.02	31.7	Q53GF4|Q53GF4_HUMAN	Syntaxin binding protein 2 variant (Fragment) - Homo sapiens	1.2597	0.0071	1.06	0.335
7.13	7.15	41.3	Q86Y82|STX12_HUMAN	Syntaxin-12 - Homo sapiens	0.9919	0.8973	1.0255	0.5534
9.02	9.04	51.3	O15400|STX7_HUMAN	Syntaxin-7 - Homo sapiens	1.0901	0.37	1.0008	0.9956
4.08	4.14	35.2	Q9UNK0|STX8_HUMAN	Syntaxin-8 - Homo sapiens	0.9818	0.8076	1.1037	0.3423
3.04	3.08	19.3	O00186|STXB3_HUMAN	Syntaxin-binding protein 3 - Homo sapiens	1.2708	0.2258	1.1824	0.2766
20.36	20.39	33.5	Q9Y490|TLN1_HUMAN	Talin-1 - Homo sapiens	1.1818	0.065	1.1737	0.0432
8.6	8.61	27	A2ABC0|A2ABC0_HUMAN	TAP binding protein - Homo sapiens	0.9406	0.2386	1.0471	0.3604
3.76	3.97	13.9	Q9BX59|TPSNR_HUMAN	Tapasin-related protein precursor - Homo sapiens	0.8359	0.0545	1.2454	0.2472
4.48	4.48	14.2	P13686|PPA5_HUMAN	Tartrate-resistant acid phosphatase type 5 precursor - Homo sapiens	0.9607	0.6781	0.7607	0.0168
22.73	22.76	33	Q8WVC5|Q8WVC5_HUMAN	T-cell, immune regulator 1, ATPase, H+ transporting, lysosomal V0 subunit A3 - Homo sapiens	0.9121	0.0046	0.9451	0.0694
2.91	2.93	17.2	P78371|TCPB_HUMAN	T-complex protein 1 subunit beta - Homo sapiens	1.155	0.5131	1.1568	0.381
2.46	2.51	22.7	Q9Y6I9|TX264_HUMAN	Testis-expressed sequence 264 protein precursor - Homo sapiens	0.8528	0.1329	1.1951	0.1712
2.11	2.2	31.1	Q2M248|Q2M248_HUMAN	Tetratricopeptide repeat domain 19 - Homo sapiens	0.8732	0.1044	0.8261	0.1106
4.17	4.17	16.5	Q15006|TTC35_HUMAN	Tetratricopeptide repeat protein 35 - Homo sapiens	0.9288	0.197	1.0531	0.4133
4.63	4.7	36.2	Q6LES8|Q6LES8_HUMAN	TFAM protein (Fragment) - Homo sapiens	1.1219	0.0086	1.012	0.8346
7.05	7.05	31.4	Q9NPJ3|THEM2_HUMAN	Thioesterase superfamily member 2 - Homo sapiens	0.9097	0.1254	0.837	0.027
6.01	6.01	16.8	Q9H3N1|TXND1_HUMAN	Thioredoxin domain-containing protein 1 precursor - Homo sapiens	0.962	0.6555	1.0502	0.4541
6.13	6.13	29.1	O95881|TXD12_HUMAN	Thioredoxin domain-containing protein 12 precursor - Homo sapiens	0.9656	0.6063	1.2131	0.0095
6.01	6.03	29.5	Q9H1E5|TXD13_HUMAN	Thioredoxin domain-containing protein 13 precursor - Homo sapiens	0.9655	0.7232	0.9334	0.6572
2.11	2.12	30.1	Q9Y320|TXD14_HUMAN	Thioredoxin domain-containing protein 14 precursor - Homo sapiens	1.0447	0.5528	1.6889	0.0965
16.21	16.24	44.8	Q9BS26|TXND4_HUMAN	Thioredoxin domain-containing protein 4 precursor - Homo sapiens	0.9519	0.1273	0.9284	0.0238
16.02	16.2	44	Q8NBS9|TXND5_HUMAN	Thioredoxin domain-containing protein 5 precursor - Homo sapiens	0.9537	0.4732	1.0615	0.3332
3.52	13.26	34.6	Q59ET7|Q59ET7_HUMAN	Thioredoxin reductase 2 isoform 1 variant (Fragment) - Homo sapiens
14.4	14.42	36.8	Q9NNW7|TRXR2_HUMAN	Thioredoxin reductase 2, mitochondrial precursor - Homo sapiens	0.9385	0.7274	1.1255	0.1641
5.77	5.79	44	Q99757|THIOM_HUMAN	Thioredoxin, mitochondrial precursor - Homo sapiens	0.9891	0.884	0.9961	0.9528
23.91	23.91	56.3	P30048|PRDX3_HUMAN	Thioredoxin-dependent peroxide reductase, mitochondrial precursor - Homo sapiens	1.1357	0.0004	0.9806	0.5371
2.48	2.5	54.5	Q86V81|THOC4_HUMAN	THO complex subunit 4 - Homo sapiens	0.8839	0.0429	0.9878	0.8721
8.67	8.73	33.3	Q9BW92|SYTM_HUMAN	Threonyl-tRNA synthetase, mitochondrial precursor - Homo sapiens	1.0224	0.5723	1.048	0.3726
18.76	18.82	47.4	Q53F23|Q53F23_HUMAN	Thromboxane A synthase 1 (Platelet, cytochrome P450, family 5, subfamily A) isoform TXS-I variant (Fragment) - Homo sapiens	1.0384	0.1921	1.1308	0.0007
2.42	2.45	79.5	Q5T4B6|Q5T4B6_HUMAN	Thymosin-like 4 - Homo sapiens	2.3723	0	2.1462	0
9.02	9.03	38.7	Q9BVV7|TI21L_HUMAN	TIM21-like protein, mitochondrial precursor - Homo sapiens	0.9687	0.6342	1.0509	0.5154
5.04	5.06	21.5	P04066|FUCO_HUMAN	Tissue alpha-L-fucosidase precursor - Homo sapiens	1.0862	0.3001	0.897	0.1016
6.33	9.48	18.8	Q8WZ42|TITIN_HUMAN	Titin - Homo sapiens	0.9618	0.3852	1.0397	0.2081
3.51	3.64	17.2	O60603|TLR2_HUMAN	Toll-like receptor 2 precursor - Homo sapiens	1.1117	0.2292	0.9698	0.7562
10.83	11.07	27.6	Q9NR97|TLR8_HUMAN	Toll-like receptor 8 precursor - Homo sapiens	0.9841	0.6879	0.8018	0
7.13	7.13	29.1	Q9NXH8|CI167_HUMAN	Torsin family protein C9orf167 - Homo sapiens	0.9974	0.9757	0.9524	0.5184
3.07	3.08	25.9	O14656|TOR1A_HUMAN	Torsin-1A precursor - Homo sapiens	1.0178	0.8766	1.2662	0.2881
6.76	6.9	34.5	Q5JTV8|TOIP1_HUMAN	Torsin-1A-interacting protein 1 - Homo sapiens	0.9426	0.4276	1.067	0.3414
4.07	4.1	25.1	Q8NFQ8|TOIP2_HUMAN	Torsin-1A-interacting protein 2 - Homo sapiens	1.0674	0.6281	1.2754	0.0283
2.03	2.04	23.8	O14657|TOR1B_HUMAN	Torsin-1B precursor - Homo sapiens
2.4	2.4	39.5	O43715|TRIA1_HUMAN	TP53-regulated inhibitor of apoptosis 1 - Homo sapiens	1.1826	0.1434	0.9387	0.4275
7.31	7.35	30.9	Q9H4I3|TRABD_HUMAN	TraB domain-containing protein - Homo sapiens	1.0012	0.9911	1.1619	0.1487
7.1	7.1	27.6	Q9BV79|MECR_HUMAN	Trans-2-enoyl-CoA reductase, mitochondrial precursor - Homo sapiens	0.9097	0.1894	0.9475	0.4448
4.91	4.91	26.8	Q9Y4P3|TBL2_HUMAN	Transducin beta-like 2 protein - Homo sapiens	0.9058	0.0245	1.0709	0.2118
15.67	15.7	31.5	Q06AH7|Q06AH7_HUMAN	Transferrin - Homo sapiens	1.0408	0.6501	1.06	0.1449
6.01	6.03	23.3	P01137|TGFB1_HUMAN	Transforming growth factor beta-1 precursor - Homo sapiens	0.9037	0.6981	1	0.9998
8.64	8.65	37.1	O43493|TGON2_HUMAN	Trans-Golgi network integral membrane protein 2 precursor - Homo sapiens	1.1477	0.1941	0.9173	0.4613
15.99	16.08	33.5	Q9Y5S1|TRPV2_HUMAN	Transient receptor potential cation channel subfamily V member 2 - Homo sapiens	1.0704	0.4368	1.0009	0.9826
6.08	6.25	23.6	Q53EM5|Q53EM5_HUMAN	Transketolase variant (Fragment) - Homo sapiens	1.3556	0.0122	1.5987	0.0501
6.98	7.02	21.2	P46199|IF2M_HUMAN	Translation initiation factor IF-2, mitochondrial precursor - Homo sapiens	1.1062	0.6186	1.2459	0.014
16.28	16.29	44.7	Q53G69|Q53G69_HUMAN	Translocase of inner mitochondrial membrane 44 homolog (Fragment) - Homo sapiens	1.0076	0.8877	0.941	0.1205
16.32	16.32	39.5	Q0VAB1|Q0VAB1_HUMAN	Translocase of inner mitochondrial membrane 50 homolog - Homo sapiens	1.02	0.6589	1.0085	0.8666
9.26	9.27	22.1	Q99442|SEC62_HUMAN	Translocation protein SEC62 - Homo sapiens	1.0466	0.4144	1.2146	0.0007
15.73	15.79	28.9	Q9UGP8|SEC63_HUMAN	Translocation protein SEC63 homolog - Homo sapiens	1.0074	0.877	1.0782	0.2745
4.47	4.47	14.3	P43307|SSRA_HUMAN	Translocon-associated protein subunit alpha precursor - Homo sapiens	1.0071	0.8602	1.1799	0.0019
2.05	2.05	23.1	P51571|SSRD_HUMAN	Translocon-associated protein subunit delta precursor - Homo sapiens	1.1258	0.5035	1.1355	0.2051
3.16	3.23	20	Q9UNL2|SSRG_HUMAN	Translocon-associated protein subunit gamma - Homo sapiens	0.7905	0.0687	1.0803	0.7337
2.02	2.08	11.1	Q9NS93|TM7S3_HUMAN	Transmembrane 7 superfamily member 3 precursor - Homo sapiens	1.1211		0.8948	0.152
5.54	5.84	24.4	Q99805|TM9S2_HUMAN	Transmembrane 9 superfamily member 2 precursor - Homo sapiens	0.9661	0.5625	0.8048	0.012
10.37	10.5	22.8	Q9HD45|TM9S3_HUMAN	Transmembrane 9 superfamily member 3 precursor - Homo sapiens	1.0508	0.3675	0.9034	0.2043
7.81	7.82	16	Q92544|TM9S4_HUMAN	Transmembrane 9 superfamily member 4 precursor - Homo sapiens	1.0371	0.4386	0.9867	0.82
3.36	3.38	35.1	Q9UM00|TMCO1_HUMAN	Transmembrane and coiled-coil domain-containing protein 1 - Homo sapiens	0.9982	0.9829	1.3536	0
1.59	1.63	13	Q6UWJ1|TMCO3_HUMAN	Transmembrane and coiled-coil domain-containing protein 3 precursor - Homo sapiens	1.1575	0.1813	0.9481	0.7875
2.1	2.11	21.6	Q13445|TMED1_HUMAN	Transmembrane emp24 domain-containing protein 1 precursor - Homo sapiens	0.7048	0.049	0.9344	0.3527
12.24	12.24	38.8	P49755|TMEDA_HUMAN	Transmembrane emp24 domain-containing protein 10 precursor - Homo sapiens	1.0038	0.9275	1.0647	0.1585
1.74	1.75	41	Q9Y3Q3|TMED3_HUMAN	Transmembrane emp24 domain-containing protein 3 precursor - Homo sapiens	0.9234	0.593	0.9368	0.6694
6.29	6.3	28.2	Q7Z7H5|TMED4_HUMAN	Transmembrane emp24 domain-containing protein 4 precursor - Homo sapiens	0.9815	0.7364	0.9323	0.5316
4.28	4.31	24	Q9Y3A6|TMED5_HUMAN	Transmembrane emp24 domain-containing protein 5 precursor - Homo sapiens	0.8542	0.0138	0.9299	0.6188
3.58	3.58	33	Q9Y3B3|TMED7_HUMAN	Transmembrane emp24 domain-containing protein 7 precursor - Homo sapiens	0.9591	0.3023	0.7646	0.0157
4.77	4.84	28	Q9BVK6|TMED9_HUMAN	Transmembrane emp24 domain-containing protein 9 precursor - Homo sapiens	0.978	0.6989	1.1819	0.023
18.57	18.57	22	Q14956|GPNMB_HUMAN	Transmembrane glycoprotein NMB precursor - Homo sapiens	1.0303	0.6865	0.9463	0.382
6.21	6.24	20.2	Q9BVC6|TM109_HUMAN	Transmembrane protein 109 precursor - Homo sapiens	0.9516	0.3657	1.1627	0.0084
2.06	2.06	20.3	Q9P0I2|TM111_HUMAN	Transmembrane protein 111 - Homo sapiens	0.78	0.0721	0.8459	0.2893
7.85	7.85	45.6	Q9H061|T126A_HUMAN	Transmembrane protein 126A - Homo sapiens	1.0487	0.5821	0.9305	0.2796
2.94	2.94	28.2	Q9NX00|TM160_HUMAN	Transmembrane protein 160 - Homo sapiens	0.8298	0.2447	0.5519	0.1966
3.14	3.28	15.4	Q4KMQ2|TM16F_HUMAN	Transmembrane protein 16F - Homo sapiens	0.9532	0.6691	1.0599	0.5455
2.06	2.07	11.1	Q86WV6|TM173_HUMAN	Transmembrane protein 173 - Homo sapiens	0.8534	0.1836	0.6591	0.2598
1.57	1.58	10.1	Q96HH6|TMM19_HUMAN	Transmembrane protein 19 - Homo sapiens	1.067	0.3285	1.1419	0.1918
6.13	6.17	24.7	Q8IY95|TM192_HUMAN	Transmembrane protein 192 - Homo sapiens	1.1694	0.1303	1.2506	0.0692
4.49	4.49	34.4	Q6UW68|TM205_HUMAN	Transmembrane protein 205 - Homo sapiens	1.0199		0.9237
2	2	10.7	Q8N4V1|TMM32_HUMAN	Transmembrane protein 32 precursor - Homo sapiens	0.8484		0.6551
5.03	5.13	27.5	P57088|TMM33_HUMAN	Transmembrane protein 33 - Homo sapiens	0.8659	0.005	0.9024	0.0753
2	2	12.1	Q96HV5|TM41A_HUMAN	Transmembrane protein 41A precursor - Homo sapiens	0.8197	0.0162	1.0984	0.3843
11.13	11.19	40.8	Q9BTV4|TMM43_HUMAN	Transmembrane protein 43 - Homo sapiens	0.9671	0.5218	1.1895	0.0007
5.95	6.07	19.6	O94886|TM63A_HUMAN	Transmembrane protein 63A - Homo sapiens	0.9133	0.572	0.9832	0.7352
4.47	4.47	45	Q6PI78|TMM65_HUMAN	Transmembrane protein 65 - Homo sapiens	1.1577	0.3216	0.9323	0.6322
4	4	24.2	Q9BUB7|TMM70_HUMAN	Transmembrane protein 70 - Homo sapiens	0.5212	0.504	0.7214	0.7189
2.17	3.71	39.9	Q5J8M3|TMM85_HUMAN	Transmembrane protein 85 - Homo sapiens	0.9697	0.8374	1.073	0.6099
4.01	4.01	36.4	Q9BV81|TMM93_HUMAN	Transmembrane protein 93 - Homo sapiens	1.2253	0.1072	1.2639	0.4535
7.21	7.38	24.6	B1AZV3|B1AZV3_HUMAN	Transporter 1 ATP-binding cassette sub-family B - Homo sapiens	0.9648	0.9203	1.3062	0.4784
71.18	71.28	69.1	P40939|ECHA_HUMAN	Trifunctional enzyme subunit alpha, mitochondrial precursor - Homo sapiens	0.9939	0.7711	0.9923	0.6839
47.81	47.81	66.7	P55084|ECHB_HUMAN	Trifunctional enzyme subunit beta, mitochondrial precursor - Homo sapiens	0.9387	0.0102	0.9428	0.0025
4.07	4.11	32.9	Q53HE2|Q53HE2_HUMAN	Triosephosphate isomerase (Fragment) - Homo sapiens	0.843	0.0842	0.9701	0.6882
18.31	18.35	38.5	O14773|TPP1_HUMAN	Tripeptidyl-peptidase 1 precursor - Homo sapiens	0.9127	0.1376	0.9375	0.0165
9.29	9.34	37.9	Q9Y606|TRUA_HUMAN	tRNA pseudouridine synthase A - Homo sapiens	1.0166	0.8364	1.0469	0.4886
2.58	2.59	28.1	Q96Q11|TRNT1_HUMAN	tRNA-nucleotidyltransferase 1, mitochondrial precursor - Homo sapiens	0.9818	0.8268	0.9659	0.5546
4.29	8.87	50	Q5U0D9|Q5U0D9_HUMAN	Tropomyosin 4 - Homo sapiens	1.709	0.0682	1.7088	0.0153
2.83	2.84	19.8	P07477|TRY1_HUMAN	Trypsin-1 precursor - Homo sapiens	1.1091	0.2343	1.2447	0.2977
4.24	4.24	34.7	Q6IB06|Q6IB06_HUMAN	TST protein - Homo sapiens	1.0818	0.1908	0.9467	0.0556
15.78	15.79	31.6	Q9BQE3|TBA1C_HUMAN	Tubulin alpha-1C chain - Homo sapiens	1.2909	0.0097	2.6499	0
4.66	4.66	13.4	P25942|TNR5_HUMAN	Tumor necrosis factor receptor superfamily member 5 precursor - Homo sapiens	1.0514	0.7354	1.0361	0.7846
57.75	57.84	54.6	Q5CAQ5|Q5CAQ5_HUMAN	Tumor rejection antigen (Gp96) 1 - Homo sapiens	0.9817	0.313	1.1445	0
3.71	3.71	37.1	Q53X69|Q53X69_HUMAN	TXN protein (Fragment) - Homo sapiens	0.9002	0.4871	1.5133	0.1267
3.21	3.22	34.6	Q6RW13|ATRAP_HUMAN	Type-1 angiotensin II receptor-associated protein - Homo sapiens	0.7301	0.1174	0.6633	0.0482
2.01	2.01	29.2	Q6FGA5|Q6FGA5_HUMAN	TYROBP protein - Homo sapiens	1.133	0.4051	1.1014	0.6179
2	14.8	36.4	P78324|SHPS1_HUMAN	Tyrosine-protein phosphatase non-receptor type substrate 1 precursor - Homo sapiens	1.215	0.0875	0.7928	0.2331
5.6	5.8	34.4	Q9Y2Z4|SYYM_HUMAN	Tyrosyl-tRNA synthetase, mitochondrial precursor - Homo sapiens	1.0354	0.4587	1.0264	0.4473
2.03	2.04	18.1	Q9NVA1|UQCC_HUMAN	Ubiquinol-cytochrome c reductase complex chaperone CBP3 homolog - Homo sapiens	0.9808	0.8331	0.7652	0.0542
6.41	6.43	20.8	Q5HYK3|COQ5_HUMAN	Ubiquinone biosynthesis methyltransferase COQ5, mitochondrial precursor - Homo sapiens	0.9642	0.7293	0.7252	0.0944
2.18	2.18	13.9	Q9Y2Z9|COQ6_HUMAN	Ubiquinone biosynthesis monooxygenase COQ6 - Homo sapiens	0.8905	0.4612	0.787	0.3182
6.82	6.93	35.8	O75208|COQ9_HUMAN	Ubiquinone biosynthesis protein COQ9, mitochondrial precursor - Homo sapiens	0.7455	0.0011	0.8437	0.0069
1.88	1.89	18.2	Q9Y385|UB2J1_HUMAN	Ubiquitin-conjugating enzyme E2 J1 - Homo sapiens	1.0152	0.9858	1.108	0.7351
2.51	2.53	16.9	Q5JRR8|Q5JRR8_HUMAN	Ubiquitin-like modifier activating enzyme 1 - Homo sapiens	1.1081		1.3202
4.28	4.3	20	Q96CS3|UBXD8_HUMAN	UBX domain-containing protein 8 - Homo sapiens	1.0506	0.7902	1.2681	0.3386
34.38	34.41	34.2	Q9NYU2|UGGG1_HUMAN	UDP-glucose:glycoprotein glucosyltransferase 1 precursor - Homo sapiens	0.9284	0.0195	1.0932	0.0018
2.72	2.82	21.4	Q8NBZ7|UXS1_HUMAN	UDP-glucuronic acid decarboxylase 1 - Homo sapiens	1.176	0.1764	1.0567	0.697
1.57	1.57	9.1	Q9H3H5|GPT_HUMAN	UDP-N-acetylglucosamine--dolichyl-phosphate N-acetylglucosaminephosphotransferase - Homo sapiens	0.9031	0.5014	1.1115	0.153
2.79	2.85	23.2	Q504T5|Q504T5_HUMAN	UNC84B protein - Homo sapiens
3.6	3.61	17.7	Q86TW2|ADCK1_HUMAN	Uncharacterized aarF domain-containing protein kinase 1 precursor - Homo sapiens	0.7655	0.163	0.7903	0.4105
2.85	2.88	22.2	Q96D53|ADCK4_HUMAN	Uncharacterized aarF domain-containing protein kinase 4 - Homo sapiens	1.0097		0.8162
2.1	2.11	25.7	Q3MIX3|ADCK5_HUMAN	Uncharacterized aarF domain-containing protein kinase 5 - Homo sapiens	0.7419	0.401	0.8719	0.6596
48.57	48.59	78.8	A8MVT9|A8MVT9_HUMAN	Uncharacterized protein ACAA2 (Fragment) - Homo sapiens	1.0361	0.1987	0.9187	0.0006
4.07	12.64	27.9	A8MYK9|A8MYK9_HUMAN	Uncharacterized protein ATP2A3 - Homo sapiens	0.892	0.338	1.0532	0.6537
1.88	1.91	24.4	A6NFI0|A6NFI0_HUMAN	Uncharacterized protein BCAP29 - Homo sapiens	0.9829	0.8509	1.0616	0.6855
11.45	11.54	54.1	Q9BRX8|CJ058_HUMAN	Uncharacterized protein C10orf58 precursor - Homo sapiens	1.0845	0.0721	1.0724	0.1376
2.08	2.08	15	Q96QE5|Q96QE5_HUMAN	Uncharacterized protein C17orf42 - Homo sapiens	0.8857	0.176	1.0165	0.838
2.39	2.46	18.2	Q9BQA9|CQ062_HUMAN	Uncharacterized protein C17orf62 - Homo sapiens	0.8948	0.2923	0.8053	0.1723
2.3	2.3	55.4	A1L188|CQ089_HUMAN	Uncharacterized protein C17orf89 - Homo sapiens	0.816	0.4803	0.9265	0.5354
3.75	3.75	22.8	Q96ND0|CR019_HUMAN	Uncharacterized protein C18orf19 - Homo sapiens	0.8633	0.2822	0.8609	0.3036
2.16	2.33	27.7	Q96DM3|MIC1_HUMAN	Uncharacterized protein C18orf8 - Homo sapiens	0.8666	0.1741	1.0672	0.5711
3.69	3.7	23.5	Q9BSF4|CS052_HUMAN	Uncharacterized protein C19orf52 - Homo sapiens	0.8356	0.1646	0.9568	0.8178
1.7	1.73	7.8	Q9H7T9|CA135_HUMAN	Uncharacterized protein C1orf135 - Homo sapiens
2	2.01	27.2	Q5JTJ3|CA031_HUMAN	Uncharacterized protein C1orf31 - Homo sapiens
4.03	4.2	25.2	Q96HY6|CT116_HUMAN	Uncharacterized protein C20orf116 precursor - Homo sapiens	1.217	0.2817	1.0916	0.5659
3.32	3.33	17.4	Q9BQP7|CT072_HUMAN	Uncharacterized protein C20orf72 - Homo sapiens	0.937	0.5991	0.9344	0.719
2.41	2.41	14.3	Q8N357|CB018_HUMAN	Uncharacterized protein C2orf18 precursor - Homo sapiens	0.8596	0.2075	0.8479	0.2007
4.1	4.1	23.1	Q9GZY8|CB033_HUMAN	Uncharacterized protein C2orf33 - Homo sapiens	0.9426	0.7039	0.7593	0.2617
3.9	3.92	24.7	Q8WWC4|CB047_HUMAN	Uncharacterized protein C2orf47, mitochondrial precursor - Homo sapiens	1.112	0.0153	1.0031	0.9481
10.26	10.28	43.2	Q9NPL8|CC001_HUMAN	Uncharacterized protein C3orf1 - Homo sapiens	1.0509	0.2765	1.1169	0.1593
4.83	4.83	35.3	Q9BU61|CC060_HUMAN	Uncharacterized protein C3orf60 - Homo sapiens	0.8301	0.0569	0.9248	0.3533
5.56	5.57	50	Q7Z7K0|CC068_HUMAN	Uncharacterized protein C3orf68 - Homo sapiens	0.8374	0.1231	0.8698	0.0463
2.79	2.82	27.8	Q8NC60|CD014_HUMAN	Uncharacterized protein C4orf14 - Homo sapiens	1.0631	0.7361	1.2669	0.4738
2.03	2.03	33.3	Q8N8J7|CD032_HUMAN	Uncharacterized protein C4orf32 - Homo sapiens	1.0118		1.2181
2.71	2.84	26.3	Q9P0P8|CF203_HUMAN	Uncharacterized protein C6orf203 - Homo sapiens	0.8528	0.0038	0.8036	0.017
1.8	1.84	25.3	O95766|CG028_HUMAN	Uncharacterized protein C7orf28 - Homo sapiens	1.0365	0.8794	0.9131	0.5183
1.97	1.99	21.4	Q96EH3|CG030_HUMAN	Uncharacterized protein C7orf30 - Homo sapiens	1.1438	0.1281	0.9147	0.4049
4.88	4.88	70.6	Q8N4H5|CI105_HUMAN	Uncharacterized protein C9orf105 - Homo sapiens	1.027	0.6558	0.8982	0.0473
6.59	6.68	40.8	Q9HBL7|CI046_HUMAN	Uncharacterized protein C9orf46 - Homo sapiens	0.9622	0.2835	1.0214	0.589
1.7	3.73	23.4	A8MW68|A8MW68_HUMAN	Uncharacterized protein CAPZA2 - Homo sapiens	0.8956	0.0581	1.1603	0.4039
6.94	6.95	46	A6NIH1|A6NIH1_HUMAN	Uncharacterized protein ENSP00000350479 - Homo sapiens	1.3613	0.0046	1.1897	0.0031
2	2	44.3	A8MYH7|A8MYH7_HUMAN	Uncharacterized protein ENSP00000381615 (Fragment) - Homo sapiens
15.04	15.16	35.7	A8MYW1|A8MYW1_HUMAN	Uncharacterized protein ERO1L - Homo sapiens	0.9399	0.0674	1.0209	0.5723
16.37	16.49	31.4	Q8N766|K0090_HUMAN	Uncharacterized protein KIAA0090 precursor - Homo sapiens	0.8352	0.0031	0.9759	0.5674
9.09	9.11	34.2	Q14165|K0152_HUMAN	Uncharacterized protein KIAA0152 precursor - Homo sapiens	1.0125	0.8292	1.1929	0.0067
5.58	5.6	29.3	Q8IYS2|K2013_HUMAN	Uncharacterized protein KIAA2013 precursor - Homo sapiens	1.0688	0.2469	1.0766	0.3374
2.13	2.21	36.5	A8MPQ9|A8MPQ9_HUMAN	Uncharacterized protein LYRM7 (Fragment) - Homo sapiens	0.8358	0.1036	0.9604	0.5206
8.58	8.7	42.2	A6NG03|A6NG03_HUMAN	Uncharacterized protein MRPL1 - Homo sapiens	0.9704	0.5853	0.9769	0.757
7.5	7.54	32.7	A8MW24|A8MW24_HUMAN	Uncharacterized protein PICALM - Homo sapiens	1.3691	0.0122	0.6885	0
1.64	1.78	19.3	A6NIA8|A6NIA8_HUMAN	Uncharacterized protein SLC4A7 - Homo sapiens	1.1468	0.3566	0.9957	0.967
3.16	3.16	38.1	A8MWB3|A8MWB3_HUMAN	Uncharacterized protein VAMP2 - Homo sapiens	1.0474	0.6748	1.1211	0.037
13.64	13.67	40.8	A6NDZ0|A6NDZ0_HUMAN	Uncharacterized protein VAPA - Homo sapiens	1.1661	0.0727	1.101	0.142
1.52	1.52	71.4	Q9P032|CF066_HUMAN	UPF0240 protein C6orf66 - Homo sapiens	1.0268	0.6714	1.0145	0.6365
2.08	2.09	32.9	Q9NRP2|CP061_HUMAN	UPF0287 protein C16orf61 - Homo sapiens	1.1115	0.2087	1.0329	0.5861
2.01	2.02	21.4	Q96GQ5|CP058_HUMAN	UPF0420 protein C16orf58 - Homo sapiens	1.0191	0.8982	0.8412	0.5154
6.28	6.35	38.5	Q4G0N4|CE033_HUMAN	UPF0465 protein C5orf33 - Homo sapiens	0.9801	0.6505	0.9097	0.1106
4.06	4.08	37.6	Q9NPA0|CO024_HUMAN	UPF0480 protein C15orf24 precursor - Homo sapiens	0.9482	0.6892	1.1755	0.173
3.07	3.08	30.9	Q5UCC4|CS063_HUMAN	UPF0510 protein C19orf63 precursor - Homo sapiens	1.0316	0.6638	0.9342	0.2473
2.52	2.52	29.7	Q7L592|CB056_HUMAN	UPF0511 protein C2orf56, mitochondrial precursor - Homo sapiens	1.0747	0.7063	0.8927	0.1673
4.46	4.58	22.5	Q6NUQ4|U535_HUMAN	UPF0535 membrane protein - Homo sapiens	0.8672	0.1823	0.9605	0.6361
1.71	1.73	20.3	Q9H6V9|CB043_HUMAN	UPF0554 protein C2orf43 - Homo sapiens	0.798		0.8555
4.3	4.37	27.7	O94874|K0776_HUMAN	UPF0555 protein KIAA0776 - Homo sapiens	1.2676	0.0284	1.2437	0.0024
7.02	7.13	24.3	Q969H8|CS010_HUMAN	UPF0556 protein C19orf10 precursor - Homo sapiens	0.9877	0.8793	1.0811	0.3703
3.72	3.72	51.7	Q96IX5|USMG5_HUMAN	Up-regulated during skeletal muscle growth protein 5 - Homo sapiens	0.8037	0.1915	0.8859	0.1143
8.37	8.38	56.8	Q6FGD1|Q6FGD1_HUMAN	UQCRB protein - Homo sapiens	1.0508	0.5759	1.0437	0.2614
1.49	1.51	24.2	Q03405|UPAR_HUMAN	Urokinase plasminogen activator surface receptor precursor - Homo sapiens	1.048	0.8243	1.0488	0.2293
5.01	5.64	21.8	P46939|UTRO_HUMAN	Utrophin - Homo sapiens	1.1123	0.2165	1.3067	0.2468
41.15	41.18	51.4	P38606|VATA_HUMAN	Vacuolar ATP synthase catalytic subunit A - Homo sapiens	0.9228	0.0169	1.0926	0.0005
31.49	31.5	55.6	P21281|VATB2_HUMAN	Vacuolar ATP synthase subunit B, brain isoform - Homo sapiens	0.8588	0.0001	1.0785	0.0079
1.35	2.05	15.3	Q5THJ4|VP13D_HUMAN	Vacuolar protein sorting-associated protein 13D - Homo sapiens	0.9062	0.645	1.04	0.7407
2.04	2.59	18.7	Q9H269|VPS16_HUMAN	Vacuolar protein sorting-associated protein 16 homolog - Homo sapiens	1.0551	0.7816	1.0756	0.6343
2.28	2.34	16.6	Q9P253|VPS18_HUMAN	Vacuolar protein sorting-associated protein 18 homolog - Homo sapiens	0.9	0.388	1.1412	0.4287
2.92	2.93	11.5	Q9UBQ0|VPS29_HUMAN	Vacuolar protein sorting-associated protein 29 - Homo sapiens	1.5079	0.0241	1.2159	0.1251
2.73	2.83	14.7	Q96QK1|VPS35_HUMAN	Vacuolar protein sorting-associated protein 35 - Homo sapiens	1.2573	0.1594	1.0534	0.8859
18.76	18.77	47.9	P21283|VATC1_HUMAN	Vacuolar proton pump subunit C 1 - Homo sapiens	0.8658	0.0016	1.0538	0.0642
11.67	11.7	39.3	Q9Y5K8|VATD_HUMAN	Vacuolar proton pump subunit D - Homo sapiens	0.8874	0.1029	0.8891	0.0916
10.66	10.68	31.6	P61421|VA0D1_HUMAN	Vacuolar proton pump subunit d 1 - Homo sapiens	1.0179	0.5198	1.0579	0.1065
6.52	6.52	79.8	Q16864|VATF_HUMAN	Vacuolar proton pump subunit F - Homo sapiens	0.7933	0.0247	1.0335	0.3276
11.65	11.71	34	Q9UI12|VATH_HUMAN	Vacuolar proton pump subunit H - Homo sapiens	0.7997	0.0331	1.1732	0.162
17.91	18.19	23.5	Q93050|VPP1_HUMAN	Vacuolar proton translocating ATPase 116 kDa subunit a isoform 1 - Homo sapiens	0.921	0.1414	0.895	0.0805
4.64	4.64	29.9	Q86WA6|BPHL_HUMAN	Valacyclovir hydrolase precursor - Homo sapiens	0.89	0.0327	0.8578	0.1396
7.7	8.01	30	Q2TAI5|Q2TAI5_HUMAN	Valosin-containing protein - Homo sapiens	1.1531	0.0118	1.1951	0.0028
2.31	2.33	14.4	Q59FI1|Q59FI1_HUMAN	Valyl-tRNA synthetase-like protein (Fragment) - Homo sapiens	0.9579	0.6739	1.2814	0.3706
6.02	6.04	41.3	P50552|VASP_HUMAN	Vasodilator-stimulated phosphoprotein - Homo sapiens	1.3894		1.4127
4.11	4.21	20.5	Q8IWB7|WDFY1_HUMAN	WD repeat and FYVE domain-containing protein 1 - Homo sapiens	0.8822	0.0442	0.7868	0.0086
63.98	63.98	73	P49748|ACADV_HUMAN	Very long-chain specific acyl-CoA dehydrogenase, mitochondrial precursor - Homo sapiens	0.9158	0.0003	0.9306	0.0003
2.13	2.16	22.5	Q9Y3E0|GOT1B_HUMAN	Vesicle transport protein GOT1B - Homo sapiens	0.7905		0.5882
4.02	4.02	26.7	Q9UEU0|VTI1B_HUMAN	Vesicle transport through interaction with t-SNAREs homolog 1B - Homo sapiens	1.1745	0.4059	1.2475	0.1495
6.02	6.02	55	Q9BV40|VAMP8_HUMAN	Vesicle-associated membrane protein 8 - Homo sapiens	0.9156	0.3303	0.9749	0.6649
33.72	33.73	54.4	P46459|NSF_HUMAN	Vesicle-fusing ATPase - Homo sapiens	1.2387	0	1.0739	0.0713
8.91	8.91	35.8	O75396|SC22B_HUMAN	Vesicle-trafficking protein SEC22b - Homo sapiens	1.0198	0.8558	1.2633	0.202
32.3	32.32	65	Q53HU8|Q53HU8_HUMAN	Vimentin variant (Fragment) - Homo sapiens	1.12	0.0347	2.2344	0
2.36	2.58	27.3	P18206|VINC_HUMAN	Vinculin - Homo sapiens	1.3052	0.6765	1.1995	0.2573
2.01	2.01	13.6	Q8N0U8|VKORL_HUMAN	Vitamin K epoxide reductase complex subunit 1-like protein 1 - Homo sapiens	0.8457	0.686	0.9184	0.3119
1.5	1.5	11.1	O76024|WFS1_HUMAN	Wolframin - Homo sapiens	0.929	0.4708	1.0472	0.6654
21.36	22.59	68.2	P21796|VDAC1_HUMAN	Voltage-dependent anion-selective channel protein 1 - Homo sapiens	0.9872	0.7952	1.0012	0.9667
27.41	27.41	52.4	P45880|VDAC2_HUMAN	Voltage-dependent anion-selective channel protein 2 - Homo sapiens	0.9937	0.9018	1.0621	0.0939
11.72	14.93	51.2	Q9Y277|VDAC3_HUMAN	Voltage-dependent anion-selective channel protein 3 - Homo sapiens	1.0387	0.4881	1.2608	0
6.9	6.9	25.8	Q9Y279|VSIG4_HUMAN	V-set and immunoglobulin domain-containing protein 4 precursor - Homo sapiens	1.2226	0.1313	0.5925	0.06
1.36	1.6	19.9	Q9UMN6|WBP7_HUMAN	WW domain-binding protein 7 - Homo sapiens	0.9624	0.7218	1.0169	0.8558
5.56	5.58	19.5	Q96DZ1|XTP3B_HUMAN	XTP3-transactivated gene B protein precursor - Homo sapiens	0.8345	0.1374	1.0155	0.8529
2.13	2.38	13.2	Q9BQ52|RNZ2_HUMAN	Zinc phosphodiesterase ELAC protein 2 - Homo sapiens	0.9712	0.8176	0.8778	0.5686
4.75	4.76	12.4	Q9Y6M5|ZNT1_HUMAN	Zinc transporter 1 - Homo sapiens	1.0641	0.4421	1.0896	0.1288
2.01	2.1	9	Q8TAD4|ZNT5_HUMAN	Zinc transporter 5 - Homo sapiens	1.6261		1.5575
2.91	2.94	15.4	Q8NEW0|ZNT7_HUMAN	Zinc transporter 7 - Homo sapiens	0.929	0.281	0.7754	0.0001
2.03	2.03	13.6	Q92504|S39A7_HUMAN	Zinc transporter SLC39A7 - Homo sapiens	0.9608	0.4837	1.0818	0.0756
3.01	3.01	17.8	Q8N1S5|S39AB_HUMAN	Zinc transporter ZIP11 - Homo sapiens	0.8924	0.4206	0.8871	0.5468
2.41	2.42	20.7	Q8N4Q0|ZADH2_HUMAN	Zinc-binding alcohol dehydrogenase domain-containing protein 2 - Homo sapiens	1.0405	0.5742	0.9958	0.9467

## Sheet: cytoplasmic I
Unused	Total	Seq.cov			iTRAQ	p-Value	iTRAQ	p-Value	iTRAQ	p-Value
ProtScore	ProtScore	(%)	SwissProt Access	Protein Name	115:114	115:114	116:114	116:114	117:114	117:114
1.55	1.56	16.8	Q9NRX4|PHP14_HUMAN	14 kDa phosphohistidine phosphatase - Homo sapiens	0.9214	0.4229	0.9989	0.9945	0.8822	0.2057
4.77	17.65	54.5	P31946|1433B_HUMAN	14-3-3 protein beta/alpha - Homo sapiens	0.8516	0.0728	1.0171	0.8145	0.9766	0.6744
7.47	10.99	45.9	P62258|1433E_HUMAN	14-3-3 protein epsilon - Homo sapiens	0.817	0.0882	1.0624	0.556	0.9941	0.9576
6.22	14.32	51.2	Q04917|1433F_HUMAN	14-3-3 protein eta - Homo sapiens	0.9083	0.3913	0.9808	0.3834	0.8037	0.3801
16.89	21.27	51.4	P61981|1433G_HUMAN	14-3-3 protein gamma - Homo sapiens	0.8554	0.0313	0.8341	0.0114	0.8665	0.0914
5.49	14.14	40	P27348|1433T_HUMAN	14-3-3 protein theta - Homo sapiens	1.0242	0.882	1.1595	0.304	1.1414	0.3567
22.29	22.33	62.4	P63104|1433Z_HUMAN	14-3-3 protein zeta/delta - Homo sapiens	0.849	0.0195	0.9115	0.0981	1.0668	0.202
5	5	17	Q16698|DECR_HUMAN	2,4-dienoyl-CoA reductase, mitochondrial precursor - Homo sapiens	1.911	0.0121	1.471	0.0373	2.476	0.0021
4.64	4.81	25.5	P17980|PRS6A_HUMAN	26S protease regulatory subunit 6A - Homo sapiens	0.8577	0.0566	1.0188	0.8795	0.8571	0.5861
4.88	5.25	23.7	P62333|PRS10_HUMAN	26S protease regulatory subunit S10B - Homo sapiens	0.781	0.0208	0.8102	0.0042	0.7329	0.0026
1.63	1.9	17.5	Q15008|PSMD6_HUMAN	26S proteasome non-ATPase regulatory subunit 6 - Homo sapiens	0.7011	0.3989	0.6681	0.2658	0.5828	0.159
3.81	3.82	15.1	P51665|PSD7_HUMAN	26S proteasome non-ATPase regulatory subunit 7 - Homo sapiens	0.8563	0.1151	1.052	0.6431	0.8113	0.118
2	2.01	7.6	O00233|PSMD9_HUMAN	26S proteasome non-ATPase regulatory subunit 9 - Homo sapiens	0.7528	0.0453	0.7566	0.0716	0.4264	0.2726
4.63	4.65	22.1	Q13442|HAP28_HUMAN	28 kDa heat- and acid-stable phosphoprotein - Homo sapiens	0.6231	0.0068	0.8822	0.5456	0.6839	0.3122
1.73	1.77	19.2	P52815|RM12_HUMAN	39S ribosomal protein L12, mitochondrial precursor - Homo sapiens	1.9715	0.0004	1.5446	0.0199	2.5044	0.0003
2.38	2.5	12.7	Q6NVY1|HIBCH_HUMAN	3-hydroxyisobutyryl-CoA hydrolase, mitochondrial precursor - Homo sapiens
5.43	5.45	18.1	P42765|THIM_HUMAN	3-ketoacyl-CoA thiolase, mitochondrial - Homo sapiens	2.2425	0.0001	1.7494	0.0022	3.2577	0.0001
1.79	1.82	15.1	P09110|THIK_HUMAN	3-ketoacyl-CoA thiolase, peroxisomal precursor - Homo sapiens
8.66	10.38	50.9	P46783|RS10_HUMAN	40S ribosomal protein S10 - Homo sapiens	1.1609	0.0223	0.8916	0.0249	0.9807	0.7143
7.75	7.76	34.2	P62280|RS11_HUMAN	40S ribosomal protein S11 - Homo sapiens	1.2265	0.0017	0.9527	0.3591	0.9654	0.4721
2.01	2.02	26.5	Q76M58|Q76M58_HUMAN	40S ribosomal protein S12 - Homo sapiens	1.1737	0.0026	0.9743	0.6666	1.1537	0.0294
10.37	10.37	67.5	P62277|RS13_HUMAN	40S ribosomal protein S13 - Homo sapiens	1.224	0.0001	0.884	0.0032	0.9578	0.4097
11.69	11.69	39.7	P62263|RS14_HUMAN	40S ribosomal protein S14 - Homo sapiens	1.323	0.0119	0.9458	0.5692	1.1451	0.0693
1.99	1.99	44.6	P62244|RS15A_HUMAN	40S ribosomal protein S15a - Homo sapiens	1.2159	0.0013	0.9139	0.2171	1.0347	0.556
16.71	16.71	76	P62249|RS16_HUMAN	40S ribosomal protein S16 - Homo sapiens	1.4786	0	1.1248	0.0674	1.4509	0.0001
1.78	2.38	23.7	P08708|RS17_HUMAN	40S ribosomal protein S17 - Homo sapiens	1.4517	0.1253	0.9027	0.2798	1.0994	0.4339
6.87	6.87	56.3	P60866|RS20_HUMAN	40S ribosomal protein S20 - Homo sapiens	1.2311	0.072	0.846	0.0626	0.9795	0.813
7.45	7.49	37.8	P62266|RS23_HUMAN	40S ribosomal protein S23 - Homo sapiens	1.0973	0.228	0.9021	0.1949	0.9801	0.7888
2.23	2.24	41.7	Q7Z3D1|Q7Z3D1_HUMAN	40S ribosomal protein S24 - Homo sapiens	0.8823	0.5642	0.9797	0.6683	0.9602	0.8081
5.69	5.73	44.8	P62851|RS25_HUMAN	40S ribosomal protein S25 - Homo sapiens	1.1996	0.0632	1.0392	0.6558	1.1368	0.1516
3.73	3.76	30.4	P62854|RS26_HUMAN	40S ribosomal protein S26 - Homo sapiens	1.1108	0.2432	0.8224	0.0552	0.9352	0.4011
16.69	16.69	62	P62701|RS4X_HUMAN	40S ribosomal protein S4, X isoform - Homo sapiens	1.2828	0	0.934	0.1172	1.003	0.9385
7.49	7.49	28.9	P46782|RS5_HUMAN	40S ribosomal protein S5 - Homo sapiens	1.232	0.0346	0.8863	0.0565	1.0508	0.4721
8.12	8.13	52.6	P46781|RS9_HUMAN	40S ribosomal protein S9 - Homo sapiens	1.2694	0.0009	0.8361	0.0199	0.8108	0.036
8.6	8.66	31.5	P08865|RSSA_HUMAN	40S ribosomal protein SA - Homo sapiens	1.4949	0.0363	1.1068	0.3824	1.3443	0.03
2.09	2.3	14.9	P08195|4F2_HUMAN	4F2 cell-surface antigen heavy chain - Homo sapiens	1.5812	0.0033	1.0654	0.5701	1.453	0.0058
6.35	8.55	20	P49189|AL9A1_HUMAN	4-trimethylaminobutyraldehyde dehydrogenase - Homo sapiens	1.019	0.8575	0.9111	0.3386	0.9955	0.966
13.28	13.33	22.5	P10809|CH60_HUMAN	60 kDa heat shock protein, mitochondrial precursor - Homo sapiens	2.1428	0	1.4648	0	3.2987	0
9.13	9.14	30.3	Q53HK9|Q53HK9_HUMAN	60S acidic ribosomal protein P0 (Fragment) - Homo sapiens	1.1158	0.1162	0.7928	0.0051	0.9951	0.9267
5.96	5.99	44.7	P62906|RL10A_HUMAN	60S ribosomal protein L10a - Homo sapiens	1.0093	0.9077	0.7582	0.006	0.8823	0.0666
9.84	9.93	51.7	Q6NZ55|Q6NZ55_HUMAN	60S ribosomal protein L13 - Homo sapiens	0.997	0.9797	0.706	0.0022	0.5137	0.0015
5.88	5.89	24.5	P84098|RL19_HUMAN	60S ribosomal protein L19 - Homo sapiens	1.0222	0.8075	0.7825	0.0001	0.7134	0.0002
10.76	11.01	46.8	P62750|RL23A_HUMAN	60S ribosomal protein L23a - Homo sapiens	0.9301	0.1963	0.8491	0.0072	0.94	0.4417
7.15	7.17	43.3	P83731|RL24_HUMAN	60S ribosomal protein L24 - Homo sapiens	0.893	0.1578	0.7456	0.0117	0.6928	0.0001
4.08	4.08	21.4	Q8WTY3|Q8WTY3_HUMAN	60S ribosomal protein L27 - Homo sapiens	1.2653	0.0154	0.844	0.197	0.8842	0.1362
2.45	2.45	25.5	P46779|RL28_HUMAN	60S ribosomal protein L28 - Homo sapiens	0.9831	0.8785	0.9179	0.1734	0.6863	0.0003
4.59	4.59	27.8	P62888|RL30_HUMAN	60S ribosomal protein L30 - Homo sapiens	1.3163	0.0689	1.0026	0.9869	1.3567	0.0307
1.76	1.76	31.6	P49207|RL34_HUMAN	60S ribosomal protein L34 - Homo sapiens	0.963	0.819	0.948	0.69	1.0164	0.8933
2	2.09	36.6	P42766|RL35_HUMAN	60S ribosomal protein L35 - Homo sapiens
2.78	2.78	55.5	P18077|RL35A_HUMAN	60S ribosomal protein L35a - Homo sapiens	1.0884	0.1831	0.9053	0.1641	0.6853	0.135
2.35	2.35	20	Q9Y3U8|RL36_HUMAN	60S ribosomal protein L36 - Homo sapiens	0.9677	0.7347	0.6543	0.0106	0.6948	0.0131
3.59	3.62	46.2	Q969Q0|RL36L_HUMAN	60S ribosomal protein L36a-like - Homo sapiens	1.1986	0.0816	0.9367	0.4941	0.8835	0.1523
9.44	9.44	30.1	Q9HBB3|Q9HBB3_HUMAN	60S ribosomal protein L6 - Homo sapiens	0.9999	0.9989	0.8062	0.0006	0.7794	0.0026
9.16	9.16	36.2	P62917|RL8_HUMAN	60S ribosomal protein L8 - Homo sapiens	1.1488	0.0112	0.854	0.0136	0.9389	0.1122
5.5	5.5	17.4	P17858|K6PL_HUMAN	6-phosphofructokinase, liver type - Homo sapiens	0.6372	0.0056	0.7503	0.0045	0.6225	0.024
26.88	26.88	37.9	P52209|6PGD_HUMAN	6-phosphogluconate dehydrogenase, decarboxylating - Homo sapiens	0.8302	0	0.9692	0.2398	0.919	0.0035
10.26	10.27	25.6	Q9UK67|Q9UK67_HUMAN	70 kDa SHP-1L protein - Homo sapiens	0.8534	0.0017	0.9244	0.1421	0.6658	0.0001
22.85	28.04	43	P11021|GRP78_HUMAN	78 kDa glucose-regulated protein precursor - Homo sapiens	1.7785	0	1.0799	0.0108	2.0316	0
4.33	4.33	13.9	Q9BWD1|THIC_HUMAN	Acetyl-CoA acetyltransferase, cytosolic - Homo sapiens	0.8644	0.0148	0.7903	0.0004	0.7978	0.0009
4.69	7.42	26.3	Q92688|AN32B_HUMAN	Acidic leucine-rich nuclear phosphoprotein 32 family member B - Homo sapiens	1.112		0.9578		0.7504
18.1	18.11	20.2	Q4LE36|Q4LE36_HUMAN	ACLY variant protein (Fragment) - Homo sapiens	0.812	0.0005	1.0489	0.2621	0.8726	0.0017
7.63	7.69	16	Q5VZA7|Q5VZA7_HUMAN	Aconitase 1, soluble - Homo sapiens	0.8636	0.0452	0.9201	0.3073	0.7547	0.0065
9.43	9.55	26.4	Q99798|ACON_HUMAN	Aconitate hydratase, mitochondrial precursor - Homo sapiens	1.7407	0	1.554	0	2.3827	0
2.47	29.83	52.4	Q13707|Q13707_HUMAN	ACTA2 protein (Fragment) - Homo sapiens	0.9514	0.8008	0.8331	0.2662	0.8468	0.2607
10.63	10.64	43.8	Q2LE71|Q2LE71_HUMAN	Actin related protein 2/3 complex - Homo sapiens	0.9398	0.1792	0.8919	0.0136	1.0035	0.954
31.88	31.89	32.3	Q1HE25|Q1HE25_HUMAN	Actinin alpha 1 isoform b - Homo sapiens	0.8417	0.0206	1.2278	0.0001	1.5324	0
3.57	21.47	71.8	Q562Y8|Q562Y8_HUMAN	Actin-like protein (Fragment) - Homo sapiens
2	23.11	64.1	Q562Z4|Q562Z4_HUMAN	Actin-like protein (Fragment) - Homo sapiens
13.68	13.7	41.1	P61160|ARP2_HUMAN	Actin-related protein 2 - Homo sapiens	0.9336	0.134	0.9638	0.3499	1.1654	0.0044
7.65	8.76	31.2	O15143|ARC1B_HUMAN	Actin-related protein 2/3 complex subunit 1B - Homo sapiens	1.018	0.7492	1.1257	0.0704	1.0961	0.3323
6.07	6.09	44	P59998|ARPC4_HUMAN	Actin-related protein 2/3 complex subunit 4 - Homo sapiens	1.2294	0.0024	1.2812	0.0117	1.6469	0.0001
10.01	10.02	67.5	O15511|ARPC5_HUMAN	Actin-related protein 2/3 complex subunit 5 - Homo sapiens	0.8388	0	0.9042	0.0026	1.0413	0.2032
6.32	6.36	37.3	Q59G24|Q59G24_HUMAN	Activated RNA polymerase II transcription cofactor 4 variant (Fragment) - Homo sapiens	0.7172	0.1188	0.7268	0.4444	0.671	0.0986
2.16	2.17	15.7	O95433|AHSA1_HUMAN	Activator of 90 kDa heat shock protein ATPase homolog 1 - Homo sapiens	1.1247	0.2057	1.1493	0.2357	1.0453	0.7644
3.54	3.54	33.3	O14561|ACPM_HUMAN	Acyl carrier protein, mitochondrial precursor - Homo sapiens	1.1317	0.732	1.8166	0.0383	1.7455	0.2663
4.06	4.07	11.5	P13798|ACPH_HUMAN	Acylamino-acid-releasing enzyme - Homo sapiens	1.0352	0.7661	1.1949	0.1364	1.1224	0.1954
8.11	8.14	63.2	P07108|ACBP_HUMAN	Acyl-CoA-binding protein - Homo sapiens	0.7701	0.0051	0.9511	0.4918	0.8342	0.005
1.41	1.41	5.9	Q5T4U5|Q5T4U5_HUMAN	Acyl-Coenzyme A dehydrogenase, C-4 to C-12 straight chain - Homo sapiens	0.9594	0.7823	1.2618	0.0551	1.5311	0.1766
3.14	3.16	18.3	Q53HR2|Q53HR2_HUMAN	Acyl-Coenzyme A dehydrogenase, very long chain variant (Fragment) - Homo sapiens	2.143		1.4809		1.8021
6.09	6.1	22.8	P07741|APT_HUMAN	Adenine phosphoribosyltransferase - Homo sapiens	0.9264	0.5646	0.9939	0.9473	0.9053	0.162
2.02	2.09	15.9	Q86U79|Q86U79_HUMAN	Adenosine kinase - Homo sapiens	0.7888	0.2912	0.9673	0.5617	0.8653	0.2319
2.38	2.4	15.2	Q5T694|Q5T694_HUMAN	Adenosine monophosphate deaminase 2 - Homo sapiens	0.9631	0.8842	0.9814	0.8497	1.2539	0.0698
10.01	10.01	23.8	P23526|SAHH_HUMAN	Adenosylhomocysteinase - Homo sapiens	1.1102	0.3274	1.2491	0.0092	1.1804	0.1623
7.7	7.71	28	Q5EB54|Q5EB54_HUMAN	Adenylate kinase 2 - Homo sapiens	1.6068	0.0253	2.0039	0.0127	1.8292	0.0219
3.83	3.84	12.3	P30520|PURA2_HUMAN	Adenylosuccinate synthetase isozyme 2 - Homo sapiens	0.8285	0.1842	0.9103	0.5448	0.9163	0.4275
22.24	22.24	38.5	Q01518|CAP1_HUMAN	Adenylyl cyclase-associated protein 1 - Homo sapiens	0.8934	0.0255	1.0553	0.3298	1.2147	0.0035
7.33	7.51	39.8	P61204|ARF3_HUMAN	ADP-ribosylation factor 3 - Homo sapiens	1.2208	0.0664	1.4142	0.0034	1.305	0.0213
3.15	3.16	33.7	P10109|ADX_HUMAN	Adrenodoxin, mitochondrial precursor - Homo sapiens	2.0369	0.0246	1.4428	0.0162	1.8472	0.0196
4.55	4.55	18.9	O43488|ARK72_HUMAN	Aflatoxin B1 aldehyde reductase member 2 - Homo sapiens	0.9333	0.6251	1.0298	0.5855	1.2522	0.0464
3.6	3.64	10.7	Q2TSD3|Q2TSD3_HUMAN	Aging-associated gene 6 protein - Homo sapiens	1.3872	0.0048	1.1186	0.2576	0.9522	0.6828
9.42	9.43	30.6	Q2TU77|Q2TU77_HUMAN	Aging-associated protein 2 - Homo sapiens	0.8083	0.0247	0.8811	0.0486	0.843	0.0664
2.78	2.82	22.1	O00170|AIP_HUMAN	AH receptor-interacting protein - Homo sapiens	0.9911	0.9517	1.0319	0.7746	0.9058	0.6271
1.58	1.97	7.7	Q12802|AKP13_HUMAN	A-kinase anchor protein 13 - Homo sapiens	0.9274	0.6711	1.0348	0.8628	0.8823	0.6441
5.56	5.97	25.8	Q6IAZ4|Q6IAZ4_HUMAN	AKR1A1 protein - Homo sapiens	0.8511	0.101	0.9057	0.2351	0.8074	0.0523
2.12	2.16	16.5	Q6FGA4|Q6FGA4_HUMAN	AKR1B1 protein - Homo sapiens	0.9466	0.7276	1.0131	0.9163	1.0113	0.9585
8.56	8.61	15.4	P49588|SYAC_HUMAN	Alanyl-tRNA synthetase, cytoplasmic - Homo sapiens	0.878	0.0202	0.8223	0.0172	0.7702	0.0024
4.55	4.56	21.9	Q6IRT1|Q6IRT1_HUMAN	Alcohol dehydrogenase 5 (Class III), chi polypeptide - Homo sapiens	0.8796	0.1611	0.961	0.6878	0.9534	0.6294
1.72	3.96	29.5	Q5SYR1|Q5SYR1_HUMAN	Aldehyde dehydrogenase 1 family, member A1 - Homo sapiens
1.71	1.73	15.6	Q8IZ83|A16A1_HUMAN	Aldehyde dehydrogenase family 16 member A1 - Homo sapiens	1.0263	0.8998	1.0173	0.8204	1.1647	0.5019
3.91	3.93	17.8	Q96C23|GALM_HUMAN	Aldose 1-epimerase - Homo sapiens	0.9857	0.8844	0.9617	0.7346	0.8953	0.4851
3.84	4.52	53.1	Q4V347|Q4V347_HUMAN	Allograft inflammatory factor 1 - Homo sapiens	0.9165	0.1557	1.0494	0.1335	0.9085	0.0589
2.19	2.21	20.1	P01009|A1AT_HUMAN	Alpha-1-antitrypsin precursor - Homo sapiens	1.7911	0.0006	1.1745	0.2145	1.6403	0.0073
2.54	2.55	22.4	P30533|AMRP_HUMAN	Alpha-2-macroglobulin receptor-associated protein precursor - Homo sapiens	1.6625	0.0996	0.9016	0.3467	1.4961	0.0918
7.08	14.65	28.3	O43707|ACTN4_HUMAN	Alpha-actinin-4 - Homo sapiens	0.9038	0.1454	1.2856	0.0001	1.4963	0
5.31	5.31	15.2	P61163|ACTZ_HUMAN	Alpha-centractin - Homo sapiens	0.8842	0.1979	0.9131	0.4673	1.2767	0.048
50.18	50.18	65	P06733|ENOA_HUMAN	Alpha-enolase - Homo sapiens	0.8366	0	0.9579	0.0531	0.9286	0.0071
2.33	2.36	11.3	Q7LDY7|Q7LDY7_HUMAN	Alpha-KG-E2 - Homo sapiens	1.7432	0.1404	0.9492	0.8266	1.6918	0.3203
1.45	1.62	14.4	Q14769|Q14769_HUMAN	Alpha-N-acetylglucosaminidase - Homo sapiens	1.8117	0.0139	1.2739	0.1799	2.2587	0.2183
2.68	2.69	12.2	P54920|SNAA_HUMAN	Alpha-soluble NSF attachment protein - Homo sapiens	1.1347	0.2788	1.1013	0.2327	1.4445	0.0064
1.93	1.99	14.1	P40222|TXLNA_HUMAN	Alpha-taxilin - Homo sapiens	0.7224	0.1393	0.5018	0.0109	0.5699	0.1051
2.28	2.35	11.7	Q9H4A4|AMPB_HUMAN	Aminopeptidase B - Homo sapiens	0.5163		0.6878		0.7354
2.07	2.15	22.1	Q6FI81|CPIN1_HUMAN	Anamorsin - Homo sapiens	0.9454		0.9074		0.8262
40.07	41.8	80.3	Q5TZZ9|Q5TZZ9_HUMAN	Annexin A1 - Homo sapiens	1.1075	0.0009	1.0827	0.0012	1.458	0
81.47	81.47	82.9	Q8TBV2|Q8TBV2_HUMAN	Annexin A2 - Homo sapiens	1.5014	0	1.1738	0	1.8541	0
9.9	10.6	29.1	Q5T0M7|Q5T0M7_HUMAN	Annexin A7 - Homo sapiens	1.1408	0.0215	1.1376	0.0162	1.8588	0
26.23	26.5	42.4	Q6ICS0|Q6ICS0_HUMAN	ANXA11 protein (Fragment) - Homo sapiens	1.3188	0	0.8786	0.0499	1.4164	0
21.61	25.44	57.6	Q6LES2|Q6LES2_HUMAN	ANXA4 protein (Fragment) - Homo sapiens	1.2835	0.0001	1.0679	0.2271	1.9102	0
35.22	35.76	66.3	Q6FHB3|Q6FHB3_HUMAN	ANXA5 protein (Fragment) - Homo sapiens	1.0551	0.1435	1.0206	0.477	1.9125	0
2.04	2.08	12.5	O43747|AP1G1_HUMAN	AP-1 complex subunit gamma-1 - Homo sapiens	1.2362		1.028		1.253
3.53	3.57	13	Q20WL3|Q20WL3_HUMAN	AP1B1 protein - Homo sapiens	1.1966	0.5796	1.3978	0.187	1.5142	0.1071
7.14	7.14	20.4	Q5TZP7|Q5TZP7_HUMAN	APEX nuclease (Multifunctional DNA repair enzyme) 1 - Homo sapiens	0.816	0.1047	1.0073	0.9482	0.7928	0.0433
16.15	16.15	19.1	Q0VD83|AB48R_HUMAN	Apolipoprotein B-100 receptor - Homo sapiens	1.9922	0.0001	1.4769	0.0008	1.3832	0.0125
4.02	4.29	24.3	P02649|APOE_HUMAN	Apolipoprotein E precursor - Homo sapiens	0.9593	0.7983	0.4443	0.4034	0.6282	0.4497
9.24	9.25	26	Q59GW9|Q59GW9_HUMAN	Apolipoprotein L2 variant (Fragment) - Homo sapiens	1.6571	0.0003	1.1641	0.0183	1.0088	0.935
2.51	2.57	18.5	Q9ULZ3|ASC_HUMAN	Apoptosis-associated speck-like protein containing a CARD - Homo sapiens	0.6795	0.0235	0.84	0.0987	0.864	0.166
1.31	1.34	9.6	P09917|LOX5_HUMAN	Arachidonate 5-lipoxygenase - Homo sapiens	0.8604	0.5749	0.8269	0.4154	0.409	0.1058
1.87	3.2	17.6	P54136|SYRC_HUMAN	Arginyl-tRNA synthetase, cytoplasmic - Homo sapiens	0.7334	0.0072	0.8747	0.4125	0.7302	0.0331
1.78	3.79	34.6	Q6ICQ8|Q6ICQ8_HUMAN	ARHG protein (Fragment) - Homo sapiens	1.447	0.0998	1.035	0.6945	0.9404	0.6748
4.73	5.79	51.5	Q6IBM5|Q6IBM5_HUMAN	ARHGDIA protein - Homo sapiens	0.9367	0.406	1.0217	0.6335	1.0073	0.8762
2.03	2.07	11	Q6NX52|Q6NX52_HUMAN	ARHGEF1 protein - Homo sapiens	0.7653	0.4596	0.7325	0.0515	0.4713	0.0475
11.38	11.39	28.2	Q59FV6|Q59FV6_HUMAN	ARP3 actin-related protein 3 homolog variant (Fragment) - Homo sapiens	0.9184	0.1199	0.8269	0.0005	1.0284	0.6693
2.06	2.06	10.3	P15848|ARSB_HUMAN	Arylsulfatase B precursor - Homo sapiens	1.779	0.0809	0.8873	0.7751	1.5586	0.3049
3.25	3.26	22.3	Q53GU6|Q53GU6_HUMAN	Asparaginyl-tRNA synthetase variant (Fragment) - Homo sapiens	0.6763	0.0003	0.9631	0.5408	0.7132	0.0118
2.39	2.55	19.5	P00505|AATM_HUMAN	Aspartate aminotransferase, mitochondrial precursor - Homo sapiens	1.586	0.0032	1.3779	0.0243	2.1354	0.0009
2.83	3.08	14.8	P14868|SYDC_HUMAN	Aspartyl-tRNA synthetase, cytoplasmic - Homo sapiens	0.804	0.1194	0.9758	0.79	0.8034	0.0287
2.91	2.96	12.5	Q8WWM7|ATX2L_HUMAN	Ataxin-2-like protein - Homo sapiens	1.0748	0.7886	0.8937	0.7043	0.8124	0.0837
4.05	4.07	21.8	Q6DD88|ATLA3_HUMAN	Atlastin-3 - Homo sapiens	2.5754	0.0048	1.3039	0.0327	1.6591	0.04
2.18	3.12	20.6	Q8TAS0|Q8TAS0_HUMAN	ATP synthase gamma chain (Fragment) - Homo sapiens	2.1475	0.0002	1.065	0.488	1.281	0.0798
14.81	14.91	36.5	P25705|ATPA_HUMAN	ATP synthase subunit alpha, mitochondrial precursor - Homo sapiens	2.4458	0	1.3714	0	1.7546	0
9.84	9.84	28.4	P06576|ATPB_HUMAN	ATP synthase subunit beta, mitochondrial precursor - Homo sapiens	1.9117	0.0006	1.1162	0.2123	1.5536	0.0015
4.83	4.84	27	Q53GB3|Q53GB3_HUMAN	ATP synthase, H+ transporting, mitochondrial F0 complex, subunit b isoform 1 variant (Fragment) - Homo sapiens	1.7834	0.0174	0.849	0.251	0.9707	0.7465
2	2	8.5	Q6LEU9|Q6LEU9_HUMAN	ATP5G3 protein (Fragment) - Homo sapiens	2.6389	0.0047	1.2624	0.3077	1.3064	0.3168
6.1	6.11	39.8	Q6IB33|Q6IB33_HUMAN	ATP6V1G1 protein - Homo sapiens	1.0918	0.2696	0.744	0.0016	0.9166	0.2669
3	3.05	20.8	Q9UII2|ATIF1_HUMAN	ATPase inhibitor, mitochondrial precursor - Homo sapiens	1.9137	0.0842	1.245	0.1311	1.8596	0.0116
10.33	10.33	50.9	Q53Y06|Q53Y06_HUMAN	ATPase, H+ transporting, lysosomal 31kDa, V1 subunit E isoform 1 - Homo sapiens	1.1156	0.1326	0.8172	0.0042	0.9273	0.446
3.34	3.37	13.7	P61221|ABCE1_HUMAN	ATP-binding cassette sub-family E member 1 - Homo sapiens	0.8295	0.0031	1.004	0.9658	0.9666	0.7199
7.35	7.35	24.8	P12956|KU70_HUMAN	ATP-dependent DNA helicase 2 subunit 1 - Homo sapiens	0.9878	0.9344	1.6339	0.0001	1.7224	0.0144
7.15	7.2	22	P13010|KU86_HUMAN	ATP-dependent DNA helicase 2 subunit 2 - Homo sapiens	1.1395	0.0285	1.535	0	1.4887	0
3.92	3.96	32.8	Q6IAT8|Q6IAT8_HUMAN	B2M protein - Homo sapiens	1.6095	0.0075	0.9157	0.2819	1.4104	0.0111
2.13	2.93	9.2	Q9Y2J2|E41L3_HUMAN	Band 4.1-like protein 3 - Homo sapiens	1.8659	0.222	1.7916	0.044	1.8272	0.3987
6.92	7.32	27.9	Q7L1Q6|BZW1_HUMAN	Basic leucine zipper and W2 domain-containing protein 1 - Homo sapiens	0.686	0.0234	0.8103	0.0014	0.6618	0.0276
15.75	15.78	37.4	Q53G72|Q53G72_HUMAN	B-cell receptor-associated protein 31 variant (Fragment) - Homo sapiens	1.7766	0	1.6657	0	1.7801	0
2	2	11.8	Q53Y59|Q53Y59_HUMAN	Benzodiazapine receptor - Homo sapiens	1.7512		1.5726		1.6449
81.02	81.02	81.1	Q53GK6|Q53GK6_HUMAN	Beta actin variant (Fragment) - Homo sapiens	0.9181	0	1.0991	0	0.9499	0.0014
2.66	2.66	10.1	P02749|APOH_HUMAN	Beta-2-glycoprotein 1 precursor - Homo sapiens	1.9841	0.0001	1.8927	0.001	3.9549	0
2	5.11	12	P42025|ACTY_HUMAN	Beta-centractin - Homo sapiens
1.41	1.46	6	P08236|BGLR_HUMAN	Beta-glucuronidase precursor - Homo sapiens	1.272	0.0491	1.0915	0.0994	1.2455	0.1501
9.81	9.81	18.2	P07686|HEXB_HUMAN	Beta-hexosaminidase beta chain precursor - Homo sapiens	1.7758	0	0.9529	0.4456	1.5437	0
2	2	13.3	P55957|BID_HUMAN	BH3-interacting domain death agonist - Homo sapiens	0.543	0.3351	0.4998	0.0027	0.3144	0.0509
9.85	9.97	17.6	P07814|SYEP_HUMAN	Bifunctional aminoacyl-tRNA synthetase - Homo sapiens	0.7578	0.0048	1.0847	0.0431	0.8338	0.0285
2.02	2.24	21.6	P53004|BIEA_HUMAN	Biliverdin reductase A precursor - Homo sapiens	0.9695	0.7993	1.0892	0.6394	0.9313	0.5289
2.01	2.04	13.6	Q13867|BLMH_HUMAN	Bleomycin hydrolase - Homo sapiens
4	4.07	18.5	P80723|BASP_HUMAN	Brain acid soluble protein 1 - Homo sapiens
1.8	1.8	4.8	Q96BF6|BTBDE_HUMAN	BTB/POZ domain-containing protein 14A - Homo sapiens	0.7285		0.8065		1.1644
3.09	3.09	20.6	Q96CX2|KCD12_HUMAN	BTB/POZ domain-containing protein KCTD12 - Homo sapiens	1.02	0.8606	1.6462	0.0537	1.1751	0.7562
7.85	7.92	20.2	P11586|C1TC_HUMAN	C-1-tetrahydrofolate synthase, cytoplasmic - Homo sapiens	0.7973	0.0988	0.9032	0.2488	0.8312	0.0688
6.15	6.17	53	Q45RF0|Q45RF0_HUMAN	CAG-ISL 7 - Homo sapiens
1.48	1.51	18.2	Q9Y376|CAB39_HUMAN	Calcium-binding protein 39 - Homo sapiens	1.084	0.9093	1.1549	0.8154	0.8714	0.4209
2.01	2.05	19	Q99653|CHP1_HUMAN	Calcium-binding protein p22 - Homo sapiens	0.9903	0.8986	0.6188	0.0463	0.731	0.3614
4.15	4.66	35.5	Q9HB71|CYBP_HUMAN	Calcyclin-binding protein - Homo sapiens	0.8167	0.1414	0.8061	0.019	0.925	0.4815
20.51	20.52	58.4	P62158|CALM_HUMAN	Calmodulin - Homo sapiens	1.0485	0.2264	1.0951	0.034	1.5076	0
10.86	10.93	23.3	P27824|CALX_HUMAN	Calnexin precursor - Homo sapiens	1.9009	0	0.8884	0.3144	0.9392	0.4553
7.85	7.86	11.9	Q59EF6|Q59EF6_HUMAN	Calpain 2, large [catalytic] subunit variant (Fragment) - Homo sapiens	0.8509	0.2852	0.9498	0.6989	1.0165	0.9168
2.87	2.91	18.3	P04632|CPNS1_HUMAN	Calpain small subunit 1 - Homo sapiens	0.7857	0.0354	0.8109	0.0037	0.7725	0.123
2	9.79	21.6	Q7Z4K0|Q7Z4K0_HUMAN	Calpastatin - Homo sapiens
14.95	15.01	22.4	Q59HE3|Q59HE3_HUMAN	Calpastatin isoform a variant (Fragment) - Homo sapiens	0.6642	0.0295	0.7663	0.1254	0.6855	0.0346
17.37	17.37	35.7	Q6IAT4|Q6IAT4_HUMAN	CALR protein - Homo sapiens	1.7879	0	1.1576	0.0036	2.2569	0
2.64	2.66	13.3	Q6IAW5|Q6IAW5_HUMAN	CALU protein - Homo sapiens	2.076	0.0008	1.5739	0.0109	2.4562	0.0003
4.54	4.62	29.9	P17612|KAPCA_HUMAN	cAMP-dependent protein kinase catalytic subunit alpha - Homo sapiens	0.8589	0.105	1.1316	0.1466	0.9352	0.5699
3.69	3.7	9.2	Q6DHV4|Q6DHV4_HUMAN	CAPN1 protein - Homo sapiens	1.0814	0.3537	1.076	0.317	1.012	0.8551
17.8	18.16	35.7	Q32Q68|Q32Q68_HUMAN	Capping protein (Actin filament) muscle Z-line, beta - Homo sapiens	1.0214	0.6576	1.1091	0.0016	1.1238	0.02
2.35	2.38	13.8	Q14444|CAPR1_HUMAN	Caprin-1 - Homo sapiens	1.5732	0.2182	1.378	0.2079	1.6392	0.062
6.24	6.26	24.8	Q6JBY9|CPZIP_HUMAN	Capz-interacting protein - Homo sapiens	0.8814	0.1793	0.7626	0.1049	0.7804	0.0585
13.6	13.6	41.5	P00918|CAH2_HUMAN	Carbonic anhydrase 2 - Homo sapiens	0.7294	0	1.0408	0.437	1.0095	0.8168
9.36	9.38	39	P16152|CBR1_HUMAN	Carbonyl reductase [NADPH] 1 - Homo sapiens	0.6399	0.097	1.1089	0.4949	1.2468	0.1584
2.51	2.52	13.3	Q9NZK5|CECR1_HUMAN	Cat eye syndrome critical region protein 1 precursor - Homo sapiens	1.6644	0.0013	1.1915	0.0771	1.6386	0.0028
14.98	14.98	23.1	P04040|CATA_HUMAN	Catalase - Homo sapiens	1.0045	0.9473	0.8651	0.0138	1.1147	0.0142
9.62	9.62	22.4	P07858|CATB_HUMAN	Cathepsin B precursor - Homo sapiens	1.9271	0	0.8421	0.0021	0.8375	0.0223
16.46	16.47	39.3	P07339|CATD_HUMAN	Cathepsin D precursor - Homo sapiens	1.915	0	0.869	0	1.3844	0
6.23	6.23	17.3	Q96NY6|Q96NY6_HUMAN	Cathepsin H - Homo sapiens	1.6374	0.0003	1.0245	0.7666	1.2871	0.0269
6.6	6.61	26.7	Q9UBR2|CATZ_HUMAN	Cathepsin Z precursor - Homo sapiens	1.7697	0	0.8247	0.0137	0.6999	0.0046
2.56	2.57	16.3	Q53XT5|Q53XT5_HUMAN	CD14 antigen - Homo sapiens	1.7497	0.0582	0.4914	0.0646	0.4285	0.0861
13.72	13.72	14.1	Q9H5A7|Q9H5A7_HUMAN	CD44 molecule (Fragment) - Homo sapiens	1.6349	0	1.088	0.1849	1.6998	0
1.57	1.57	13.6	P21926|CD9_HUMAN	CD9 antigen - Homo sapiens	2.0737	0.0502	1.2079	0.284	1.4592	0.0358
8.91	8.95	34.1	Q6FG59|Q6FG59_HUMAN	CDC37 protein - Homo sapiens	0.8108	0.001	0.9778	0.7825	0.8601	0.0021
1.34	1.34	10.3	Q9H7U7|Q9H7U7_HUMAN	cDNA FLJ14249 fis, clone OVARC1001200, weakly similar to Mus musculus HS1 binding protein 3 - Homo sapiens	0.8597	0.0861	0.7042	0.4332	0.4687	0.2816
2.1	2.14	17.4	Q8N7G1|Q8N7G1_HUMAN	CDNA FLJ25678 fis, clone TST04067, highly similar to PURINE NUCLEOSIDE PHOSPHORYLASE - Homo sapiens	0.6854		1.0093	0.9861	1.1199	0.7784
1.86	1.89	16.2	Q6ZP37|Q6ZP37_HUMAN	CDNA FLJ26554 fis, clone LNF01773, highly similar to Galactokinase - Homo sapiens	0.633	0.0169	0.7408	0.1395	0.4549	0.0256
2.28	2.36	34.9	Q96MX4|Q96MX4_HUMAN	cDNA FLJ31747 fis, clone NT2RI2007377, highly similar to RNA-BINDING PROTEIN EWS - Homo sapiens	2.2711		8.5291		17.8484
1.53	1.55	8.7	Q541Z1|Q541Z1_HUMAN	cDNA FLJ34327 fis, clone FEBRA2009022, highly similar to TRANSLATION INITIATION FACTOR EIF-2B EPSILON SUBUNIT - Homo sapiens	0.8331	0.6982	0.8894	0.6935	0.8495	0.3289
2.48	2.51	10.9	Q8N9M2|Q8N9M2_HUMAN	cDNA FLJ36887 fis, clone BNGH42005504, highly similar to 26S PROTEASOME REGULATORY SUBUNIT S3 - Homo sapiens	0.6193		0.8293		0.6364
2	2.01	22	Q8N8Y7|Q8N8Y7_HUMAN	cDNA FLJ38696 fis, clone KIDNE2001931, highly similar to HETEROGENEOUS NUCLEAR RIBONUCLEOPROTEIN G - Homo sapiens	1.742	0.0811	4.7527	0.0196	2.9951	0.0392
2.03	2.08	20.6	Q6ZSI4|Q6ZSI4_HUMAN	cDNA FLJ45505 fis, clone BRTHA2020642, weakly similar to DRR1 protein - Homo sapiens	1.428	0.2396	1.883	0.1506	1.9206	0.1096
11.09	11.09	19.8	Q6ZR44|Q6ZR44_HUMAN	cDNA FLJ46672 fis, clone TRACH3009008, highly similar to Thioredoxin reductase - Homo sapiens	0.7855	0.0012	1.0946	0.1587	0.954	0.5285
2.7	2.75	13.3	A8K6Q8|A8K6Q8_HUMAN	cDNA FLJ75881, highly similar to Homo sapiens transferrin receptor - Homo sapiens	1.3622	0.1042	1.0934	0.7948	1.299	0.305
2.13	6.9	15.8	A8K4V1|A8K4V1_HUMAN	cDNA FLJ76812, highly similar to Homo sapiens IQ motif containing GTPase activating protein 2 (IQGAP2), mRNA - Homo sapiens	1.237	0.4064	1.0037	0.9785	1.0193	0.961
2.56	4.59	21.4	A8K525|A8K525_HUMAN	cDNA FLJ76817, highly similar to Homo sapiens non-POU domain containing, octamer-binding (NONO), mRNA - Homo sapiens	1.1814	0.4352	2.1469	0.0933	1.4186	0.3597
13.68	13.69	20.6	A8K6A7|A8K6A7_HUMAN	cDNA FLJ76867, highly similar to Homo sapiens mannosidase, alpha, class 2B, member 1 (MAN2B1), mRNA - Homo sapiens	1.6811	0	1.0627	0.3778	1.7834	0
4.92	4.92	27.3	A8K109|A8K109_HUMAN	cDNA FLJ78356, highly similar to Homo sapiens PIMT isozyme I - Homo sapiens	0.9836	0.8248	1.0768	0.4692	1.0292	0.5554
9.18	9.21	29.2	A8K2X8|A8K2X8_HUMAN	cDNA FLJ78433, highly similar to Homo sapiens chaperonin containing TCP1, subunit 5 - Homo sapiens	0.7003	0.0002	0.9936	0.8975	1.0914	0.1896
3.4	5.4	18.3	P60953|CDC42_HUMAN	Cell division control protein 42 homolog precursor - Homo sapiens	0.8388	0.3932	0.8017	0.1373	0.7165	0.1004
5.88	5.88	23.3	Q29971|Q29971_HUMAN	Cell surface glycoprotein - Homo sapiens	1.859	0.0071	0.8625	0.3778	1.4378	0.0639
11.1	11.11	56.5	P29373|RABP2_HUMAN	Cellular retinoic acid-binding protein 2 - Homo sapiens	0.9112	0.3674	1.1692	0.0356	1.1228	0.1699
2.04	2.34	12.7	Q5SW79|CE170_HUMAN	Centrosomal protein of 170 kDa - Homo sapiens	1.3971	0.256	0.9361	0.8247	0.9287	0.4016
3.07	3.08	17.5	Q54A51|Q54A51_HUMAN	Cervical EMMPRIN - Homo sapiens	1.7971	0.0014	1.0762	0.4526	1.5173	0.0044
4.83	6.9	28.9	Q5SZY0|Q5SZY0_HUMAN	Chaperonin containing TCP1, subunit 3 - Homo sapiens	0.8444	0.0442	0.9808	0.7853	1.0711	0.4176
17.29	17.3	32.5	Q53HU0|Q53HU0_HUMAN	Chaperonin containing TCP1, subunit 8 (Theta) variant (Fragment) - Homo sapiens	0.74	0	1.0745	0.0647	1.0232	0.6648
6.21	6.26	33	Q9H444|CHM4B_HUMAN	Charged multivesicular body protein 4b - Homo sapiens	0.9204	0.2291	0.7526	0.0293	0.799	0.067
2.56	2.58	13.7	Q9NZZ3|CHMP5_HUMAN	Charged multivesicular body protein 5 - Homo sapiens	0.9114	0.6483	0.7138	0.0005	0.6721	0.0102
8.92	8.93	36.1	Q5SRT3|Q5SRT3_HUMAN	Chloride intracellular channel 1 - Homo sapiens	0.8377	0.2815	0.77	0.0259	0.679	0.0519
2.14	4.94	24.5	Q9Y696|CLIC4_HUMAN	Chloride intracellular channel protein 4 - Homo sapiens	0.7703	0.0111	0.9084	0.1248	0.7906	0.0851
4.24	4.28	27.9	Q13185|CBX3_HUMAN	Chromobox protein homolog 3 - Homo sapiens	1.4517	0.0276	1.5921	0.1247	1.194	0.334
13.54	13.55	28.1	O75390|CISY_HUMAN	Citrate synthase, mitochondrial precursor - Homo sapiens	1.7822	0	1.5679	0	2.5778	0
15.67	15.8	20.5	Q00610|CLH1_HUMAN	Clathrin heavy chain 1 - Homo sapiens	1.2747	0.0002	1.6819	0	1.8653	0
5.61	5.64	15.7	P09496|CLCA_HUMAN	Clathrin light chain A - Homo sapiens	1.202	0.4325	1.1402	0.5746	1.443	0.1604
1.75	1.75	13.3	Q53Y37|Q53Y37_HUMAN	Clathrin, light polypeptide - Homo sapiens	1.4639	0.0768	1.3693	0.0174	1.9753	0.0109
2.02	2.04	16.7	O43809|CPSF5_HUMAN	Cleavage and polyadenylation specificity factor subunit 5 - Homo sapiens	1.3585	0.0095	2.3797	0.1016	2.012	0.1703
2.02	2.06	19.4	P33240|CSTF2_HUMAN	Cleavage stimulation factor 64 kDa subunit - Homo sapiens
2.01	2.03	9.6	O96005|CLPT1_HUMAN	Cleft lip and palate transmembrane protein 1 - Homo sapiens
10.66	10.66	52.1	Q14019|COTL1_HUMAN	Coactosin-like protein - Homo sapiens	0.9228	0.059	1.0306	0.5296	0.9752	0.6178
3.46	3.7	11.3	P53618|COPB_HUMAN	Coatomer subunit beta - Homo sapiens	0.7206	0.1727	0.978	0.8788	0.9546	0.8152
5.32	5.33	14.3	Q9Y678|COPG_HUMAN	Coatomer subunit gamma - Homo sapiens	0.6644	0.0037	0.922	0.0156	0.9028	0.3438
2	2.03	10	Q96EY8|MMAB_HUMAN	Cob(I)yrinic acid a,c-diamide adenosyltransferase, mitochondrial precursor - Homo sapiens	8.1919		3.9307		6.1344
18.63	18.72	82.5	P23528|COF1_HUMAN	Cofilin-1 - Homo sapiens	0.8546	0	1.0155	0.5346	0.9899	0.7583
2.01	2.19	12.7	Q6GSG7|Q6GSG7_HUMAN	Coiled-coil domain containing 6 - Homo sapiens	0.9392	0.8724	0.7783	0.0794	0.7159	0.0889
2	2.01	16.6	Q96CT7|CC124_HUMAN	Coiled-coil domain-containing protein 124 - Homo sapiens	0.994		0.6888		0.5303
2	2.01	21.9	Q9Y2S6|CCD72_HUMAN	Coiled-coil domain-containing protein 72 - Homo sapiens	0.8153	0.2911	0.8157	0.1678	0.8637	0.2271
2.15	2.15	18.7	Q9BWC7|Q9BWC7_HUMAN	COMT protein - Homo sapiens	1.554	0.0007	0.9287	0.4032	0.8986	0.0629
5.64	5.72	16.4	O75131|CPNE3_HUMAN	Copine-3 - Homo sapiens	1.5649	0.0941	1.297	0.4198	1.524	0.3085
7.44	7.46	11.8	Q17RK4|Q17RK4_HUMAN	Coronin 7 - Homo sapiens	1.0493	0.6284	0.9332	0.4828	0.8111	0.1742
12.07	13.38	23	Q59EA2|Q59EA2_HUMAN	Coronin, actin binding protein, 1C variant (Fragment) - Homo sapiens	1.5104	0.0002	1.638	0	1.8307	0
16.74	17.08	28.2	P31146|COR1A_HUMAN	Coronin-1A - Homo sapiens	1.0441	0.5292	1.2456	0.0012	1.3173	0
4.33	4.36	20.4	Q9BR76|COR1B_HUMAN	Coronin-1B - Homo sapiens	0.963	0.7666	1.184	0.1486	1.0322	0.7381
2.01	2.03	13.4	P28845|DHI1_HUMAN	Corticosteroid 11-beta-dehydrogenase isozyme 1 - Homo sapiens	1.2416	0.7585	1.1648	0.5442	0.9649	0.9185
3.98	3.98	64.3	Q6FHJ9|Q6FHJ9_HUMAN	COX5B protein (Fragment) - Homo sapiens	1.693	0.3427	1.0241	0.8371	0.9838	0.9553
3.95	4.36	52	Q6IB90|Q6IB90_HUMAN	CSTA protein - Homo sapiens	0.9115	0.3234	0.9603	0.7922	0.783	0.0422
11.73	11.73	28.1	Q6FHS5|Q6FHS5_HUMAN	CTSS protein - Homo sapiens	1.9566	0	1.05	0.3512	1.2922	0
2.05	2.09	12.3	Q13620|CUL4B_HUMAN	Cullin-4B - Homo sapiens	1.1483	0.6765	1.1454	0.0607	1.3583	0.0404
9.59	9.75	14.9	Q86VP6|CAND1_HUMAN	Cullin-associated NEDD8-dissociated protein 1 - Homo sapiens	0.9681	0.8137	1.0543	0.4242	1.1404	0.028
7.27	7.28	70.4	Q76LA1|Q76LA1_HUMAN	Cystatin B - Homo sapiens	0.9206	0.0693	1.0149	0.7549	0.9386	0.2293
3.12	3.12	33.8	Q53XY7|Q53XY7_HUMAN	Cysteine-rich protein 1 - Homo sapiens	0.8704	0.1272	1.0586	0.5114	1.0114	0.9113
2.08	2.16	21.2	P32320|CDD_HUMAN	Cytidine deaminase - Homo sapiens	0.8779	0.2915	0.9743	0.8537	0.8453	0.1053
4.97	5.02	15.1	P04839|CY24B_HUMAN	Cytochrome b-245 heavy chain - Homo sapiens	1.9776	0	1.2918	0.0238	1.3975	0.0451
2	2	15.4	P13498|CY24A_HUMAN	Cytochrome b-245 light chain - Homo sapiens	1.7933	0	1.0516	0.6119	1.2781	0.0288
9.57	9.57	49.5	P99999|CYC_HUMAN	Cytochrome c - Homo sapiens	1.9823	0.0306	2.4452	0.0051	2.4605	0.0122
4.04	4.04	42.7	Q8TB65|Q8TB65_HUMAN	Cytochrome c oxidase subunit Va - Homo sapiens
1.61	1.61	32.6	P14854|CX6B1_HUMAN	Cytochrome c oxidase subunit VIb isoform 1 - Homo sapiens	1.7178	0.0185	0.9552	0.5227	0.8361	0.0232
1.72	1.89	15.4	Q02318|CP27A_HUMAN	Cytochrome P450 27, mitochondrial precursor - Homo sapiens
11.76	12.03	14	Q14204|DYHC1_HUMAN	Cytoplasmic dynein 1 heavy chain 1 - Homo sapiens	0.9013	0.3025	0.9837	0.5862	0.8001	0.0341
6.01	6.01	12.3	Q7Z4X1|Q7Z4X1_HUMAN	Cytoplasmic dynein intermediate chain 2C - Homo sapiens	0.971	0.8884	0.9313	0.7659	0.8476	0.3943
3.63	3.73	10.9	Q7L576|CYFP1_HUMAN	Cytoplasmic FMR1-interacting protein 1 - Homo sapiens	1.1297	0.1566	1.1704	0.0777	1.1576	0.2275
7.14	7.46	17.3	Q07065|CKAP4_HUMAN	Cytoskeleton-associated protein 4 - Homo sapiens	1.8496	0.0007	0.9644	0.6819	1.1611	0.313
18.94	19.05	38.3	P28838|AMPL_HUMAN	Cytosol aminopeptidase - Homo sapiens	0.9706	0.6306	1.143	0.0817	1.183	0.0109
7.85	7.85	25.3	Q96KP4|CNDP2_HUMAN	Cytosolic non-specific dipeptidase - Homo sapiens	0.811	0.0138	0.8422	0.0133	0.8474	0.0015
2.31	2.31	22.5	Q6FGC3|Q6FGC3_HUMAN	DAP protein (Fragment) - Homo sapiens
1.77	1.77	13.8	Q59GX6|Q59GX6_HUMAN	DEAD/H (Asp-Glu-Ala-Asp/His) box polypeptide 3 variant (Fragment) - Homo sapiens	0.7381	0.1173	0.7705	0.2493	0.5517	0.0472
1.8	2.04	8.7	Q92608|DOCK2_HUMAN	Dedicator of cytokinesis protein 2 - Homo sapiens
1.52	1.7	7.6	Q8NF50|DOCK8_HUMAN	Dedicator of cytokinesis protein 8 - Homo sapiens	1.0445		1.4346		1.3314
6.12	6.14	34.1	Q13011|ECH1_HUMAN	Delta(3,5)-Delta(2,4)-dienoyl-CoA isomerase, mitochondrial precursor - Homo sapiens	2.4393	0.0005	1.9363	0.0001	4.1526	0
2.79	4.13	37.6	P60981|DEST_HUMAN	Destrin - Homo sapiens	0.8753	0.4215	1.1072	0.4789	1.02	0.8926
2.07	2.11	10.6	P09622|DLDH_HUMAN	Dihydrolipoyl dehydrogenase, mitochondrial precursor - Homo sapiens	2.1611	0.0058	1.5893	0.0261	2.5941	0.0173
13.31	13.31	18.9	Q59GB4|Q59GB4_HUMAN	Dihydropyrimidinase-like 2 variant (Fragment) - Homo sapiens	0.8678	0.0376	0.8655	0.0088	0.8063	0.0288
4.03	4.04	10.1	Q86TI2|DPP9_HUMAN	Dipeptidyl peptidase 9 - Homo sapiens
4	4.01	12.7	P53634|CATC_HUMAN	Dipeptidyl-peptidase 1 precursor - Homo sapiens	0.4244		0.7683		0.5179
9.48	9.51	21.6	Q9NY33|DPP3_HUMAN	Dipeptidyl-peptidase 3 - Homo sapiens	0.8749	0.0269	0.9385	0.1943	0.9445	0.3214
2.09	2.09	11.3	P53602|ERG19_HUMAN	Diphosphomevalonate decarboxylase - Homo sapiens	0.9709	0.8624	1.07	0.6363	0.7547	0.0287
2.43	2.48	9.6	P98082|DAB2_HUMAN	Disabled homolog 2 - Homo sapiens	0.7605	0.1974	0.6302	0.2315	0.443	0.1538
2.23	2.38	18.3	Q13217|DNJC3_HUMAN	DnaJ homolog subfamily C member 3 precursor - Homo sapiens	2.0168	0.0209	1.2429	0.2393	1.8421	0.0745
1.7	1.72	12.1	Q9H3Z4|DNJC5_HUMAN	DnaJ homolog subfamily C member 5 - Homo sapiens	2.1334	0.0192	1.2192	0.0983	1.6142	0.0723
1.56	1.6	18.2	Q99615|DNJC7_HUMAN	DnaJ homolog subfamily C member 7 - Homo sapiens	0.7548	0.2166	0.7333	0.1981	0.5299	0.2025
2.34	2.42	24.9	O75937|DNJC8_HUMAN	DnaJ homolog subfamily C member 8 - Homo sapiens	0.8991	0.0603	0.9914	0.8722	0.9198	0.4658
1.95	1.95	11.2	Q6FI51|Q6FI51_HUMAN	DNAJB1 protein - Homo sapiens	0.8142	0.2865	1.0925	0.5521	1.0357	0.8763
2.02	2.3	33.7	Q6FGH9|Q6FGH9_HUMAN	DNCL1 protein - Homo sapiens	1.1095	0.3989	1.0788	0.3195	0.8971	0.5225
4.04	4.04	21.4	O60496|DOK2_HUMAN	Docking protein 2 - Homo sapiens	0.8336	0.3042	0.634	0.051	0.5811	0.0375
2.8	2.82	10.1	Q7L591|DOK3_HUMAN	Docking protein 3 - Homo sapiens	0.9374	0.2454	0.6172	0.3486	0.6557	0.4129
2.02	2.05	11.6	Q2TA81|Q2TA81_HUMAN	DOK1 protein - Homo sapiens
2	2	8.3	Q8IYJ9|Q8IYJ9_HUMAN	DUSP3 protein - Homo sapiens
2.05	2.05	22.6	Q6NSA3|Q6NSA3_HUMAN	DUTP pyrophosphatase - Homo sapiens	1.0443		0.7223		1.0947
8.08	8.15	25.6	Q53H88|Q53H88_HUMAN	Dynactin 2 variant (Fragment) - Homo sapiens	0.8126	0.0155	0.9208	0.3815	1.0367	0.6423
[truncated: 660 more rows]

## Sheet: cytoplasmic II
Unused	Total	Seq.cov			iTRAQ	p-Value	iTRAQ	p-Value	iTRAQ	p-Value
[truncated: 1,124 more rows]

## Sheet: nuclear I
Unused	Total	Seq.cov			iTRAQ	p-Value	iTRAQ	p-Value	iTRAQ	p-Value
[truncated: 1,035 more rows]

[truncated: 3 more sheets: nuclear II, secretome I, secretome II]
